# Supplementary material for: A guanosine tetraphosphate (ppGpp) mediated brake on photosynthesis is required for acclimation to nitrogen limitation in Arabidopsis
Source: eLife journal article supplement (doi:10.7554/elife.75041), 2022-02-14
Supplement: fig1-data1 [file Fig_1_supp_2_data.xlsx]

## Sheet: data
Line	Treatment	GTP	G4P	ratio
1_WT1	noN	4.43546	39.2055	8.83912
1_WT1	noN	3.9516	32.6701	8.26755
1_WT1	noN	4.34517	30.0226	6.90941
1_WT1	noN	4.77916	44.8901	9.39288
2_OXRSH1	noN	6.7527	27.2938	4.0419
2_OXRSH1	noN	6.27465	20.1544	3.21203
2_OXRSH1	noN	6.5793	22.668	3.44536
2_OXRSH1	noN	7.05056	24.3464	3.45312
3_WT2	noN	5.02522	43.8793	8.73181
3_WT2	noN	4.27815	38.9112	9.09533
3_WT2	noN	5.06967	42.627	8.40824
3_WT2	noN	5.16592	42.3822	8.20419
4_rsh1-1	noN	3.9441	63.3489	16.0617
4_rsh1-1	noN	4.08376	55.0493	13.48
4_rsh1-1	noN	3.72755	52.6771	14.1319
4_rsh1-1	noN	4.49244	69.2775	15.4209
5_QM	noN	7.64443	3.60529	0.471623
5_QM	noN	6.45894	3.99536	0.618578
5_QM	noN	7.15364	1.7951	0.250935
5_QM	noN	7.56731	3.39327	0.448412
