# Supplementary material for: A guanosine tetraphosphate (ppGpp) mediated brake on photosynthesis is required for acclimation to nitrogen limitation in Arabidopsis
Source: eLife journal article supplement (doi:10.7554/elife.75041), 2022-02-14
Supplement: fig1-data1 [file Fig_1D_data.xlsx]

## Sheet: data
Line	Treatment	HOTES
1_WT1	N	2.83719
1_WT1	N	2.9638
1_WT1	N	3.90028
1_WT1	N	3.20756
2_OXRSH1	N	3.31471
2_OXRSH1	N	2.42966
2_OXRSH1	N	2.88239
2_OXRSH1	N	3.75746
3_rsh1-1	N	2.28376
3_rsh1-1	N	2.78112
3_rsh1-1	N	2.38878
3_rsh1-1	N	3.88283
4_QM	N	2.33477
4_QM	N	2.68106
4_QM	N	3.78824
4_QM	N	3.59844
1_WT1	no_N	8.26349
1_WT1	no_N	8.31895
1_WT1	no_N	8.17838
1_WT1	no_N	6.13746
2_OXRSH1	no_N	12.2247
2_OXRSH1	no_N	10.5587
2_OXRSH1	no_N	13.714
2_OXRSH1	no_N	11.9604
3_rsh1-1	no_N	5.56306
3_rsh1-1	no_N	7.42467
3_rsh1-1	no_N	6.88764
3_rsh1-1	no_N	6.86421
4_QM	no_N	10.197
4_QM	no_N	13.4186
4_QM	no_N	15.5974
4_QM	no_N	12.9265
