# Supplementary material for: A guanosine tetraphosphate (ppGpp) mediated brake on photosynthesis is required for acclimation to nitrogen limitation in Arabidopsis
Source: eLife journal article supplement (doi:10.7554/elife.75041), 2022-02-14
Supplement: fig1-data1 [file Fig_1E_data_1.xlsx]

## Sheet: data
Line	Treatment	G4P
01_D8_withN	NA	18.1529
01_D8_withN	NA	17.1139
01_D8_withN	NA	9.23003
01_D8_withN	NA	11.2135
02_D8_noN	NA	65.3466
02_D8_noN	NA	50.039
02_D8_noN	NA	37.9922
02_D8_noN	NA	41.1341
03_D12_noN	NA	12.9916
03_D12_noN	NA	12.5812
03_D12_noN	NA	7.56675
03_D12_noN	NA	7.91902
04_D16_noN	NA	29.103
04_D16_noN	NA	12.2643
04_D16_noN	NA	5.43471
04_D16_noN	NA	4.20248
