# Supplementary material for: A guanosine tetraphosphate (ppGpp) mediated brake on photosynthesis is required for acclimation to nitrogen limitation in Arabidopsis
Source: eLife journal article supplement (doi:10.7554/elife.75041), 2022-02-14
Supplement: fig1-data1 [file Fig_1E_data_2.xlsx]

## Sheet: data
Line	Treatment	GTP
01_D8_withN	NA	20.3922
01_D8_withN	NA	16.6629
01_D8_withN	NA	13.4428
01_D8_withN	NA	14.7905
02_D8_noN	NA	8.11358
02_D8_noN	NA	6.97241
02_D8_noN	NA	7.51313
02_D8_noN	NA	8.3589
03_D12_noN	NA	3.15367
03_D12_noN	NA	3.39811
03_D12_noN	NA	2.92506
03_D12_noN	NA	3.08999
04_D16_noN	NA	2.05706
04_D16_noN	NA	2.27097
04_D16_noN	NA	2.02169
04_D16_noN	NA	2.34815
