# Supplementary material for: A guanosine tetraphosphate (ppGpp) mediated brake on photosynthesis is required for acclimation to nitrogen limitation in Arabidopsis
Source: eLife journal article supplement (doi:10.7554/elife.75041), 2022-02-14
Supplement: fig1-data1 [file Fig_1F_data_1.xlsx]

## Sheet: data
Line	Treatment	G4P
1_WT1	noN	39.2055
1_WT1	noN	32.6701
1_WT1	noN	30.0226
1_WT1	noN	44.8901
2_OXRSH1	noN	27.2938
2_OXRSH1	noN	20.1544
2_OXRSH1	noN	22.668
2_OXRSH1	noN	24.3464
3_WT2	noN	43.8793
3_WT2	noN	38.9112
3_WT2	noN	42.627
3_WT2	noN	42.3822
4_rsh1-1	noN	63.3489
4_rsh1-1	noN	55.0493
4_rsh1-1	noN	52.6771
4_rsh1-1	noN	69.2775
5_QM	noN	3.60529
5_QM	noN	3.99536
5_QM	noN	1.7951
5_QM	noN	3.39327
