# Supplementary material for: A guanosine tetraphosphate (ppGpp) mediated brake on photosynthesis is required for acclimation to nitrogen limitation in Arabidopsis
Source: eLife journal article supplement (doi:10.7554/elife.75041), 2022-02-14
Supplement: fig1-data1 [file Fig_1F_data_2.xlsx]

## Sheet: Feuil1
Line	Treatment	GTP
1_WT1	noN	4.43546
1_WT1	noN	3.9516
1_WT1	noN	4.34517
1_WT1	noN	4.77916
2_OXRSH1	noN	6.7527
2_OXRSH1	noN	6.27465
2_OXRSH1	noN	6.5793
2_OXRSH1	noN	7.05056
3_WT2	noN	5.02522
3_WT2	noN	4.27815
3_WT2	noN	5.06967
3_WT2	noN	5.16592
4_rsh1-1	noN	3.9441
4_rsh1-1	noN	4.08376
4_rsh1-1	noN	3.72755
4_rsh1-1	noN	4.49244
5_QM	noN	7.64443
5_QM	noN	6.45894
5_QM	noN	7.15364
5_QM	noN	7.56731
