# Supplementary material for: A guanosine tetraphosphate (ppGpp) mediated brake on photosynthesis is required for acclimation to nitrogen limitation in Arabidopsis
Source: eLife journal article supplement (doi:10.7554/elife.75041), 2022-02-14
Supplement: fig2-data1 [file Fig_2_supp_1A_data.xlsx]

## Sheet: Sheet1
Line	Treatment	Fv/Fm	Fo	Fm
01_COL	N_08	0.848987	50.93	337.19
01_COL	N_08	0.841046	53.71	337.96
01_COL	N_08	0.843951	49.48	317.08
01_COL	N_08	0.851231	48.96	329.1
01_COL	N_08	0.844987	56.09	361.84
01_COL	N_08	0.852735	44.48	302.04
01_COL	N_08	0.845944	61.55	399.53
01_COL	N_08	0.848021	56.1	369.13
01_COL	N_08	0.853167	48	326.97
01_COL	N_08	0.848438	57.84	381.56
01_COL	N_08	0.847016	57.73	377.36
01_COL	N_08	0.849908	50.32	335.26
01_COL	N_08	0.853862	46.71	319.63
01_COL	N_08	0.847249	60.96	399.08
01_COL	N_08	0.850975	54.95	368.73
01_COL	N_08	0.860855	44.66	320.96
01_COL	N_08	0.848284	55.5	365.75
01_COL	N_08	0.851594	51.16	344.73
01_COL	N_08	0.854681	54.89	377.72
01_COL	N_08	0.843041	59.34	378.06
01_COL	N_08	0.851095	49.35	331.42
01_COL	N_08	0.846678	51.33	334.85
01_COL	N_08	0.854858	43.36	298.81
01_COL	N_08	0.851225	52.33	351.74
01_COL	N_08	0.850727	51.75	346.68
01_COL	N_08	0.852112	44.39	300.16
01_COL	N_08	0.837463	41.59	255.88
01_COL	N_08	0.845829	61.36	398
01_COL	N_08	0.851567	51.5	346.89
01_COL	N_08	0.852458	45.9	311.03
01_COL	N_08	0.846452	49.94	325.24
01_COL	N_08	0.857161	43.95	307.69
01_COL	N_08	0.854517	53.65	368.84
01_COL	N_08	0.857781	47.74	335.68
01_COL	N_08	0.855275	49.57	342.58
01_COL	N_08	0.849834	43.96	292.81
01_COL	N_08	0.85206	45.32	306.34
03_SM1	N_08	0.845289	55.88	361.19
03_SM1	N_08	0.844653	49.22	316.84
03_SM1	N_08	0.844567	52.9	340.34
03_SM1	N_08	0.846904	52.31	341.68
03_SM1	N_08	0.847929	47.65	313.34
03_SM1	N_08	0.853171	42.67	290.61
03_SM1	N_08	0.849395	41.1	272.9
03_SM1	N_08	0.850283	46.83	312.79
03_SM1	N_08	0.851239	41.01	275.61
03_SM1	N_08	0.853174	45.28	308.46
03_SM1	N_08	0.853099	40.12	273.11
03_SM1	N_08	0.855916	30.53	211.96
03_SM1	N_08	0.858669	31.62	223.66
03_SM1	N_08	0.854641	45.23	311.16
03_SM1	N_08	0.85528	43.28	299.13
03_SM1	N_08	0.853332	43.88	299.18
03_SM1	N_08	0.848879	48.88	323.45
03_SM1	N_08	0.860126	30.28	216.48
03_SM1	N_08	0.855362	37.58	259.89
03_SM1	N_08	0.856383	40.25	280.26
03_SM1	N_08	0.852016	30.14	203.67
03_SM1	N_08	0.858763	40.1	283.92
03_SM1	N_08	0.849792	44.06	293.26
03_SM1	N_08	0.849261	42.02	278.76
03_SM1	N_08	0.847726	47.61	312.66
03_SM1	N_08	0.836254	41.12	251.12
03_SM1	N_08	0.846362	40.96	266.6
03_SM1	N_08	0.854342	42.65	292.81
03_SM1	N_08	0.856294	37.48	260.81
03_SM1	N_08	0.84843	43.79	288.91
03_SM1	N_08	0.853257	38.85	264.68
03_SM1	N_08	0.852799	42.55	289.06
03_SM1	N_08	0.853241	37.44	255.18
03_SM1	N_08	0.859729	38.35	273.4
03_SM1	N_08	0.855134	37.59	259.55
03_SM1	N_08	0.847594	38.99	255.83
03_SM1	N_08	0.859578	36.74	261.64
03_SM1	N_08	0.851569	42.16	283.97
03_SM1	N_08	0.847438	35.91	235.38
03_SM1	N_08	0.863488	30.89	226.28
03_SM1	N_08	0.866137	24.94	186.31
04_QM	N_08	0.849751	52.24	347.69
04_QM	N_08	0.846097	49.92	324.36
04_QM	N_08	0.84636	51.6	335.85
04_QM	N_08	0.848719	46.27	305.92
04_QM	N_08	0.845777	52.85	342.62
04_QM	N_08	0.845678	49.38	319.98
04_QM	N_08	0.844993	62.55	403.53
04_QM	N_08	0.851566	49.96	336.58
04_QM	N_08	0.851694	48.14	324.6
04_QM	N_08	0.850132	52.05	347.24
04_QM	N_08	0.846217	54.35	353.42
04_QM	N_08	0.845014	56.7	365.84
04_QM	N_08	0.841421	62.11	391.73
04_QM	N_08	0.841762	56.32	355.92
04_QM	N_08	0.84128	61.55	387.79
04_QM	N_08	0.840656	58.17	365.06
04_QM	N_08	0.845627	56.38	365.22
04_QM	N_08	0.844262	49.26	316.3
04_QM	N_08	0.846851	54.42	355.34
04_QM	N_08	0.847697	54.52	357.97
04_QM	N_08	0.845905	61.34	398
04_QM	N_08	0.842016	58.04	367.38
04_QM	N_08	0.840853	63.02	396.05
04_QM	N_08	0.848202	45.38	298.95
04_QM	N_08	0.848084	54.38	357.96
04_QM	N_08	0.851288	53.05	356.73
04_QM	N_08	0.844989	52.71	340.04
04_QM	N_08	0.848987	48.22	319.31
04_QM	N_08	0.855105	45.8	316.09
04_QM	N_08	0.859577	43.52	309.92
04_QM	N_08	0.854363	51.34	352.52
04_QM	N_08	0.847672	47.01	308.61
04_QM	N_08	0.845159	38.3	247.35
04_QM	N_08	0.851237	49.12	330.19
04_QM	N_08	0.849535	49.87	331.44
04_QM	N_08	0.862125	38.82	281.56
04_QM	N_08	0.853526	47.27	322.72
04_QM	N_08	0.85411	41.51	284.53
04_QM	N_08	0.869104	30.61	233.85
02_OXRSH1	N_08	0.846469	47.63	310.23
02_OXRSH1	N_08	0.84389	39.51	253.09
02_OXRSH1	N_08	0.849711	37.42	248.92
02_OXRSH1	N_08	0.846567	41.13	268.13
02_OXRSH1	N_08	0.850798	41.52	278.28
02_OXRSH1	N_08	0.847264	49.65	325.07
02_OXRSH1	N_08	0.854482	41.01	281.82
02_OXRSH1	N_08	0.850648	45.37	303.78
02_OXRSH1	N_08	0.843352	45.24	288.8
02_OXRSH1	N_08	0.848599	46.05	304.16
02_OXRSH1	N_08	0.851336	43.13	290.05
02_OXRSH1	N_08	0.842417	41.55	263.67
02_OXRSH1	N_08	0.832351	39.84	237.64
02_OXRSH1	N_08	0.847475	42.55	278.97
02_OXRSH1	N_08	0.85318	40.17	273.6
02_OXRSH1	N_08	0.848748	49.9	329.98
02_OXRSH1	N_08	0.850331	48.65	325.05
02_OXRSH1	N_08	0.850035	47.65	317.74
02_OXRSH1	N_08	0.852179	44.33	299.89
02_OXRSH1	N_08	0.802022	42.29	213.61
02_OXRSH1	N_08	0.851275	44.14	296.79
02_OXRSH1	N_08	0.841883	42.32	267.65
02_OXRSH1	N_08	0.850168	47.35	316.02
02_OXRSH1	N_08	0.848435	49.83	328.77
02_OXRSH1	N_08	0.849728	49.97	332.53
02_OXRSH1	N_08	0.838014	33.22	205.08
02_OXRSH1	N_08	0.840257	47.29	296.1
02_OXRSH1	N_08	0.864599	31.57	233.16
02_OXRSH1	N_08	0.851852	48.52	327.51
02_OXRSH1	N_08	0.851263	46.83	314.85
02_OXRSH1	N_08	0.845699	49.58	321.32
02_OXRSH1	N_08	0.844212	43.7	280.51
02_OXRSH1	N_08	0.853702	43.19	295.22
02_OXRSH1	N_08	0.843411	43.43	277.35
02_OXRSH1	N_08	0.858352	33.14	233.96
02_OXRSH1	N_08	0.847994	33.3	219.07
02_OXRSH1	N_08	0.858457	37.69	266.28
02_OXRSH1	N_08	0.874437	25.66	204.36
02_OXRSH1	N_08	0.85836	38.4	271.18
02_OXRSH1	N_08	0.85692	38.46	268.8
02_OXRSH1	N_08	0.859225	39.32	279.31
02_OXRSH1	N_08	0.864159	32.84	241.68
01_COL	no_N_12	0.689539	220.44	710.04
01_COL	no_N_12	0.358251	287.94	448.68
01_COL	no_N_12	0.48586	305.62	594.43
01_COL	no_N_12	0.438198	269.21	479.19
01_COL	no_N_12	0.471837	274.27	519.29
01_COL	no_N_12	0.728797	181.6	669.61
01_COL	no_N_12	0.735548	146.49	553.9
01_COL	no_N_12	0.428853	313.32	548.58
01_COL	no_N_12	0.775603	149.24	665.07
01_COL	no_N_12	0.784048	148.05	685.57
01_COL	no_N_12	0.762353	169.77	714.38
01_COL	no_N_12	0.777569	168.98	759.74
01_COL	no_N_12	0.491764	336.31	661.72
01_COL	no_N_12	0.78465	142.82	663.2
01_COL	no_N_12	0.693937	221.55	723.87
01_COL	no_N_12	0.395556	270.15	446.94
01_COL	no_N_12	0.659017	214.41	628.8
01_COL	no_N_12	0.678517	205.99	640.75
01_COL	no_N_12	0.576132	240.49	567.37
01_COL	no_N_12	0.771763	168.72	739.23
01_COL	no_N_12	0.768049	170.87	736.62
01_COL	no_N_12	0.605188	249.17	631.11
01_COL	no_N_12	0.788819	143.84	681.17
01_COL	no_N_12	0.78146	160.66	735.15
01_COL	no_N_12	0.777115	158.35	710.41
01_COL	no_N_12	0.59702	259.6	644.2
01_COL	no_N_12	0.449243	237.69	431.57
01_COL	no_N_12	0.672456	161.81	494.01
01_COL	no_N_12	0.777678	148.82	669.39
01_COL	no_N_12	0.296653	281.81	400.67
01_COL	no_N_12	0.132038	295.22	340.13
01_COL	no_N_12	0.365432	116.31	183.29
01_COL	no_N_12	0.765963	185.46	792.44
01_COL	no_N_12	0.331378	437.65	654.54
01_COL	no_N_12	0.747495	174.4	690.68
01_COL	no_N_12	0.75893	148.48	615.92
01_COL	no_N_12	0.597535	265.54	659.76
01_COL	no_N_12	0.50878	244.21	497.15
01_COL	no_N_12	0.343173	284.8	433.6
01_COL	no_N_12	0.728684	197.45	727.75
01_COL	no_N_12	0.675122	190.46	586.25
01_COL	no_N_12	0.77575	161.13	718.53
01_COL	no_N_12	0.667994	208.46	627.88
01_COL	no_N_12	0.556557	258.9	583.84
01_COL	no_N_12	0.662573	198.92	589.52
01_COL	no_N_12	0.670099	207.96	630.37
01_COL	no_N_12	0.757587	188.04	775.7
01_COL	no_N_12	0.724296	188.86	685.01
01_COL	no_N_12	0.486607	307.82	599.58
01_COL	no_N_12	0.466107	216.91	406.28
01_COL	no_N_12	0.464357	300.86	561.68
01_COL	no_N_12	0.59064	78.81	192.52
01_COL	no_N_12	0.602042	215.98	542.72
01_COL	no_N_12	0.774826	156.79	696.35
01_COL	no_N_12	0.764804	176.79	751.67
01_COL	no_N_12	0.754041	178.65	726.3
01_COL	no_N_12	0.581531	317	757.5
01_COL	no_N_12	0.706363	188.32	641.37
01_COL	no_N_12	0.628292	128.28	345.11
01_COL	no_N_12	0.739061	190.23	729.02
01_COL	no_N_12	0.677443	217.2	673.4
01_COL	no_N_12	0.739508	133.7	513.26
01_COL	no_N_12	0.726427	204.74	748.43
01_COL	no_N_12	0.393928	250.35	413.07
01_COL	no_N_12	0.752402	186.58	753.56
01_COL	no_N_12	0.495265	242.53	480.51
01_COL	no_N_12	0.325185	295.09	437.29
01_COL	no_N_12	0.771982	162.47	712.53
01_COL	no_N_12	0.526584	243.26	513.84
01_COL	no_N_12	0.709692	205.41	707.56
01_COL	no_N_12	0.336553	348.92	525.92
01_COL	no_N_12	0.675089	183.75	565.54
01_COL	no_N_12	0.317853	172.75	253.23
01_COL	no_N_12	0.370777	383.82	609.99
01_COL	no_N_12	0.775206	152.95	680.4
01_COL	no_N_12	0.710415	209.68	724.07
01_COL	no_N_12	0.774216	165.9	734.73
01_COL	no_N_12	0.695772	143.27	470.93
01_COL	no_N_12	0.632923	260.89	710.75
01_COL	no_N_12	0.324618	307.92	455.92
01_COL	no_N_12	0.75961	168.1	699.28
01_COL	no_N_12	0.754302	166.06	675.87
01_COL	no_N_12	0.715322	187.55	658.78
01_COL	no_N_12	0.737411	178.08	678.17
01_COL	no_N_12	0.455027	292.22	536.21
01_COL	no_N_12	0.377932	361.44	581.03
01_COL	no_N_12	0.774136	161.8	716.36
01_COL	no_N_12	0.381215	312.86	505.62
01_COL	no_N_12	0.759196	162.09	673.12
01_COL	no_N_12	0.715932	165.87	583.91
01_COL	no_N_12	0.470366	259.69	490.32
01_COL	no_N_12	0.616303	136	354.42
01_COL	no_N_12	0.764363	145.9	619.13
01_COL	no_N_12	0.449403	254.42	462.08
01_COL	no_N_12	0.740123	150.17	577.85
01_COL	no_N_12	0.583722	239.21	574.64
01_COL	no_N_12	0.46101	281.8	522.83
01_COL	no_N_12	0.347404	330.55	506.5
01_COL	no_N_12	0.775661	152.05	677.77
01_COL	no_N_12	0.730242	171.21	634.68
01_COL	no_N_12	0.375102	259.43	415.14
01_COL	no_N_12	0.758465	164	678.99
01_COL	no_N_12	0.774618	45.34	201.17
01_COL	no_N_12	0.689647	63.08	203.22
03_SM1	no_N_12	0.180259	218.02	265.95
03_SM1	no_N_12	0.387537	473.44	773.01
03_SM1	no_N_12	0.613045	331.86	857.62
03_SM1	no_N_12	0.4331	453.9	800.67
03_SM1	no_N_12	0.284127	485.72	678.5
03_SM1	no_N_12	0.541589	347.43	757.9
03_SM1	no_N_12	0.461033	412.52	765.39
03_SM1	no_N_12	0.282036	421.95	587.69
03_SM1	no_N_12	0.175531	453.88	550.5
03_SM1	no_N_12	0.555312	362.83	815.92
03_SM1	no_N_12	0.273122	212.44	292.25
03_SM1	no_N_12	0.420789	356.68	615.82
03_SM1	no_N_12	0.338855	403.08	609.67
03_SM1	no_N_12	0.243674	349.09	461.56
03_SM1	no_N_12	0.260357	532.96	720.55
03_SM1	no_N_12	0.253158	530.37	710.15
03_SM1	no_N_12	0.424436	452.71	786.55
03_SM1	no_N_12	0.433868	437.36	772.54
03_SM1	no_N_12	0.206607	238.46	300.57
03_SM1	no_N_12	0.256791	511.38	688.07
03_SM1	no_N_12	0.479467	393.32	755.61
03_SM1	no_N_12	0.422669	439.98	762.11
03_SM1	no_N_12	0.246522	466.84	619.58
03_SM1	no_N_12	0.218194	430.04	550.06
03_SM1	no_N_12	0.211656	298.26	378.35
03_SM1	no_N_12	0.449067	384.06	697.09
03_SM1	no_N_12	0.387184	461.91	753.75
03_SM1	no_N_12	0.369652	460.86	731.12
03_SM1	no_N_12	0.201793	467.47	585.65
03_SM1	no_N_12	0.332924	478.36	717.1
03_SM1	no_N_12	0.539339	355.58	771.89
03_SM1	no_N_12	0.401121	420.09	701.46
03_SM1	no_N_12	0.427431	387.44	676.67
03_SM1	no_N_12	0.364257	399.53	628.43
03_SM1	no_N_12	0.18124	388.77	474.84
03_SM1	no_N_12	0.237432	553.96	726.44
03_SM1	no_N_12	0.449893	360.43	655.2
03_SM1	no_N_12	0.264312	458	622.56
03_SM1	no_N_12	0.346081	319.06	487.92
03_SM1	no_N_12	0.285542	540.23	756.14
03_SM1	no_N_12	0.60336	309.53	780.38
03_SM1	no_N_12	0.33172	476.27	712.68
03_SM1	no_N_12	0.445497	442.41	797.85
03_SM1	no_N_12	0.210742	579.86	734.69
03_SM1	no_N_12	0.311968	476.49	692.54
03_SM1	no_N_12	0.505236	394.53	797.39
03_SM1	no_N_12	0.460171	408.44	756.61
03_SM1	no_N_12	0.362437	482.62	756.96
03_SM1	no_N_12	0.206949	353.32	445.52
03_SM1	no_N_12	0.386765	421.09	686.67
03_SM1	no_N_12	0.305959	171.22	246.7
03_SM1	no_N_12	0.407371	102.92	173.65
03_SM1	no_N_12	0.312685	421.18	612.79
03_SM1	no_N_12	0.365154	456.66	719.34
03_SM1	no_N_12	0.29535	513.88	729.27
03_SM1	no_N_12	0.260399	411.07	555.8
03_SM1	no_N_12	0.199023	409.86	511.7
03_SM1	no_N_12	0.35453	412.61	639.24
03_SM1	no_N_12	0.389428	483.06	791.16
03_SM1	no_N_12	0.35294	414.72	640.93
03_SM1	no_N_12	0.396104	489.24	810.14
03_SM1	no_N_12	0.389755	325.59	533.54
03_SM1	no_N_12	0.26314	596.4	809.38
03_SM1	no_N_12	0.198085	634.82	791.63
03_SM1	no_N_12	0.240767	524.83	691.25
03_SM1	no_N_12	0.20197	401.02	502.5
03_SM1	no_N_12	0.301459	533.73	764.05
03_SM1	no_N_12	0.356914	408.07	634.55
03_SM1	no_N_12	0.448011	430.48	779.87
03_SM1	no_N_12	0.397885	402.61	668.66
03_SM1	no_N_12	0.660259	275.73	811.59
03_SM1	no_N_12	0.540751	369.98	805.62
03_SM1	no_N_12	0.405726	444.19	747.45
03_SM1	no_N_12	0.271739	550.58	756.02
03_SM1	no_N_12	0.240224	389.97	513.27
03_SM1	no_N_12	0.548645	380.79	843.66
03_SM1	no_N_12	0.241791	303.43	400.18
03_SM1	no_N_12	0.170239	328.27	395.62
03_SM1	no_N_12	0.553434	352.63	789.67
03_SM1	no_N_12	0.248105	195.41	259.89
03_SM1	no_N_12	0.333755	368.58	553.22
03_SM1	no_N_12	0.479792	440.59	846.95
03_SM1	no_N_12	0.562449	329.06	752.05
03_SM1	no_N_12	0.270313	533.54	731.19
03_SM1	no_N_12	0.437936	374.25	665.85
03_SM1	no_N_12	0.296295	334.46	475.27
03_SM1	no_N_12	0.265605	350.13	476.76
03_SM1	no_N_12	0.25231	553.59	740.4
03_SM1	no_N_12	0.505129	406.2	820.82
03_SM1	no_N_12	0.596225	316.14	782.96
03_SM1	no_N_12	0.615557	328.48	854.43
03_SM1	no_N_12	0.36484	472.46	743.86
03_SM1	no_N_12	0.545864	315.82	695.43
03_SM1	no_N_12	0.453652	382.41	699.92
03_SM1	no_N_12	0.491744	431.26	848.51
03_SM1	no_N_12	0.260312	378.21	511.31
03_SM1	no_N_12	0.498604	429.3	856.21
03_SM1	no_N_12	0.385686	503.39	819.45
03_SM1	no_N_12	0.409234	462.05	782.12
03_SM1	no_N_12	0.3108	422.79	613.45
03_SM1	no_N_12	0.334316	494.38	742.65
03_SM1	no_N_12	0.517724	352.23	730.35
03_SM1	no_N_12	0.711672	69.19	239.97
03_SM1	no_N_12	0.425431	179.03	311.59
03_SM1	no_N_12	0.469705	77.72	146.56
03_SM1	no_N_12	0.599186	124.14	309.72
03_SM1	no_N_12	0.560136	111.62	253.76
03_SM1	no_N_12	0.54685	63.16	139.38
03_SM1	no_N_12	0.647002	73.54	208.33
04_QM	no_N_12	0.797696	150.51	744.03
04_QM	no_N_12	0.70674	135.53	462.15
04_QM	no_N_12	0.792932	157.61	761.15
04_QM	no_N_12	0.682091	162.21	510.24
04_QM	no_N_12	0.7284	105.76	389.36
04_QM	no_N_12	0.73117	185.92	691.59
04_QM	no_N_12	0.760706	123.04	514.18
04_QM	no_N_12	0.787778	141.87	668.45
04_QM	no_N_12	0.69647	199.55	657.43
04_QM	no_N_12	0.751944	122.19	492.59
04_QM	no_N_12	0.718254	192.21	682.21
04_QM	no_N_12	0.759616	172.85	719.1
04_QM	no_N_12	0.804864	116.26	595.84
04_QM	no_N_12	0.653388	174.8	504.31
04_QM	no_N_12	0.764585	97.05	412.25
04_QM	no_N_12	0.788551	166.77	788.7
04_QM	no_N_12	0.749042	104.83	417.72
04_QM	no_N_12	0.727793	105.6	387.94
04_QM	no_N_12	0.76628	121.06	517.97
04_QM	no_N_12	0.779208	160.2	725.57
04_QM	no_N_12	0.740462	185.38	714.27
04_QM	no_N_12	0.77645	182.16	814.85
04_QM	no_N_12	0.593981	253.9	625.34
04_QM	no_N_12	0.809025	153.79	805.29
04_QM	no_N_12	0.798267	164.09	813.4
04_QM	no_N_12	0.694053	156.59	511.82
04_QM	no_N_12	0.766946	165.86	711.68
04_QM	no_N_12	0.720235	173.73	620.95
04_QM	no_N_12	0.683768	153.17	484.36
04_QM	no_N_12	0.71885	46.37	164.93
04_QM	no_N_12	0.794126	165.09	801.9
04_QM	no_N_12	0.746091	60.57	238.55
04_QM	no_N_12	0.742509	175.81	682.78
04_QM	no_N_12	0.770507	165.42	720.85
04_QM	no_N_12	0.760161	193.78	807.96
04_QM	no_N_12	0.693432	158.15	515.84
04_QM	no_N_12	0.805281	135.18	694.23
04_QM	no_N_12	0.771755	149.32	654.21
04_QM	no_N_12	0.758117	171.35	708.36
04_QM	no_N_12	0.799291	147.81	736.44
04_QM	no_N_12	0.673216	157.16	480.96
04_QM	no_N_12	0.769875	206.86	898.86
04_QM	no_N_12	0.687494	133.69	427.8
04_QM	no_N_12	0.775296	176.53	785.61
04_QM	no_N_12	0.785518	175.96	820.35
04_QM	no_N_12	0.750468	95.93	384.44
04_QM	no_N_12	0.792729	147.02	709.36
04_QM	no_N_12	0.737661	134.27	511.78
04_QM	no_N_12	0.745978	146.67	577.39
04_QM	no_N_12	0.627061	255.12	684.08
04_QM	no_N_12	0.777982	162.05	729.85
04_QM	no_N_12	0.753256	204.45	828.59
04_QM	no_N_12	0.741363	174.59	675.04
04_QM	no_N_12	0.71734	223.44	790.49
04_QM	no_N_12	0.800937	163.62	821.95
04_QM	no_N_12	0.703587	197.1	664.95
04_QM	no_N_12	0.713719	155.3	542.44
04_QM	no_N_12	0.709188	174.91	601.42
04_QM	no_N_12	0.739937	115.6	444.47
04_QM	no_N_12	0.672492	148.8	454.34
04_QM	no_N_12	0.736472	168.94	641.07
04_QM	no_N_12	0.725425	62.68	228.28
04_QM	no_N_12	0.733837	215.77	810.67
04_QM	no_N_12	0.687671	166.94	534.5
04_QM	no_N_12	0.736889	143.29	544.6
04_QM	no_N_12	0.756489	190.15	780.91
04_QM	no_N_12	0.774989	191.91	852.89
04_QM	no_N_12	0.709344	198.71	683.66
04_QM	no_N_12	0.778268	176	793.75
04_QM	no_N_12	0.690907	189.91	614.41
04_QM	no_N_12	0.768888	160.17	693.04
04_QM	no_N_12	0.676648	144.27	446.17
04_QM	no_N_12	0.753225	190.92	773.66
04_QM	no_N_12	0.629127	146.02	393.72
04_QM	no_N_12	0.789184	139.4	661.24
04_QM	no_N_12	0.789504	148.3	704.48
04_QM	no_N_12	0.772235	175.52	770.62
04_QM	no_N_12	0.743712	178.92	698.12
04_QM	no_N_12	0.779411	158.97	720.66
04_QM	no_N_12	0.761786	49.46	207.67
04_QM	no_N_12	0.758685	152.19	630.67
04_QM	no_N_12	0.746871	194.35	767.79
04_QM	no_N_12	0.795666	154.93	758.22
04_QM	no_N_12	0.769039	195.86	847.98
04_QM	no_N_12	0.706876	190.64	650.34
04_QM	no_N_12	0.801828	155.69	785.63
04_QM	no_N_12	0.706008	190.58	648.25
04_QM	no_N_12	0.739433	173.9	667.39
04_QM	no_N_12	0.735654	187.95	711
04_QM	no_N_12	0.778546	157.04	709.13
04_QM	no_N_12	0.708949	167.36	575.02
04_QM	no_N_12	0.731011	165.35	614.71
04_QM	no_N_12	0.660778	188.55	555.83
04_QM	no_N_12	0.748982	128.78	513.03
04_QM	no_N_12	0.731679	223.6	833.33
04_QM	no_N_12	0.789549	156.95	745.78
04_QM	no_N_12	0.786895	153.18	718.8
04_QM	no_N_12	0.725415	137.46	500.61
04_QM	no_N_12	0.801855	162.1	818.14
04_QM	no_N_12	0.816705	125.76	686.16
04_QM	no_N_12	0.719059	161.02	573.11
04_QM	no_N_12	0.710955	81.08	280.51
04_QM	no_N_12	0.734641	59.13	222.83
04_QM	no_N_12	0.683213	65.17	205.69
04_QM	no_N_12	0.794628	53.37	259.87
04_QM	no_N_12	0.74115	47.31	182.77
02_OXRSH1	no_N_12	0.816915	34.97	190.95
02_OXRSH1	no_N_12	0.758855	61.33	254.37
02_OXRSH1	no_N_12	0.742292	61.1	237.09
02_OXRSH1	no_N_12	0.743518	51.54	200.95
02_OXRSH1	no_N_12	0.71908	47.3	168.34
02_OXRSH1	no_N_12	0.754484	99.36	404.74
02_OXRSH1	no_N_12	0.772335	185.5	814.75
02_OXRSH1	no_N_12	0.730847	219.73	816.34
02_OXRSH1	no_N_12	0.720076	196.54	702.12
02_OXRSH1	no_N_12	0.754044	184.77	751.19
02_OXRSH1	no_N_12	0.760907	188.13	786.89
02_OXRSH1	no_N_12	0.728806	189.41	698.43
02_OXRSH1	no_N_12	0.722901	217.75	785.82
02_OXRSH1	no_N_12	0.777132	183.98	825.51
02_OXRSH1	no_N_12	0.737457	190	723.69
02_OXRSH1	no_N_12	0.697885	155.1	513.38
02_OXRSH1	no_N_12	0.777275	177.72	797.98
02_OXRSH1	no_N_12	0.794423	142.87	695.02
02_OXRSH1	no_N_12	0.681754	195.61	614.65
02_OXRSH1	no_N_12	0.746363	142.96	563.64
02_OXRSH1	no_N_12	0.756207	191	783.45
02_OXRSH1	no_N_12	0.731756	224.21	835.88
02_OXRSH1	no_N_12	0.75098	222.96	895.35
02_OXRSH1	no_N_12	0.759785	181.78	756.74
02_OXRSH1	no_N_12	0.735943	241.38	914.12
02_OXRSH1	no_N_12	0.815751	41.13	223.23
02_OXRSH1	no_N_12	0.757436	203.21	837.76
02_OXRSH1	no_N_12	0.762684	149.03	627.98
02_OXRSH1	no_N_12	0.755326	192	784.76
02_OXRSH1	no_N_12	0.742641	223.22	867.35
02_OXRSH1	no_N_12	0.737436	238.5	908.35
02_OXRSH1	no_N_12	0.744535	210.95	825.75
02_OXRSH1	no_N_12	0.729531	205.47	759.68
02_OXRSH1	no_N_12	0.667915	191.47	576.57
02_OXRSH1	no_N_12	0.661118	131.29	387.45
02_OXRSH1	no_N_12	0.668719	61.33	185.13
02_OXRSH1	no_N_12	0.647069	79.29	224.69
02_OXRSH1	no_N_12	0.76074	189.2	790.77
02_OXRSH1	no_N_12	0.739415	231.41	888.08
02_OXRSH1	no_N_12	0.781457	177.4	811.74
02_OXRSH1	no_N_12	0.681597	204.94	643.65
02_OXRSH1	no_N_12	0.644668	168.2	473.36
02_OXRSH1	no_N_12	0.676782	124.72	385.87
02_OXRSH1	no_N_12	0.742042	187.62	727.29
02_OXRSH1	no_N_12	0.719396	173.35	617.81
02_OXRSH1	no_N_12	0.792266	165.77	797.99
02_OXRSH1	no_N_12	0.632582	194.14	528.39
02_OXRSH1	no_N_12	0.605767	170.49	432.46
02_OXRSH1	no_N_12	0.651961	123.62	355.19
02_OXRSH1	no_N_12	0.681833	220	691.46
02_OXRSH1	no_N_12	0.715306	214.91	754.88
02_OXRSH1	no_N_12	0.74871	172.94	688.25
02_OXRSH1	no_N_12	0.728766	218.3	804.84
02_OXRSH1	no_N_12	0.714804	231.02	810.04
02_OXRSH1	no_N_12	0.630193	162.73	440.04
02_OXRSH1	no_N_12	0.767904	179.8	774.68
02_OXRSH1	no_N_12	0.696468	178.21	587.12
02_OXRSH1	no_N_12	0.364712	135.85	213.84
02_OXRSH1	no_N_12	0.731534	233.2	868.6
02_OXRSH1	no_N_12	0.779484	160.15	726.25
02_OXRSH1	no_N_12	0.655654	84.63	245.77
02_OXRSH1	no_N_12	0.655583	209.03	606.91
02_OXRSH1	no_N_12	0.69951	274.1	912.21
02_OXRSH1	no_N_12	0.622593	204.46	541.75
02_OXRSH1	no_N_12	0.575704	266.95	629.16
02_OXRSH1	no_N_12	0.686424	159.36	508.17
02_OXRSH1	no_N_12	0.613521	157.32	407.06
02_OXRSH1	no_N_12	0.66736	164.63	494.95
02_OXRSH1	no_N_12	0.758198	44.39	183.58
02_OXRSH1	no_N_12	0.697477	168.85	558.14
02_OXRSH1	no_N_12	0.660612	239.16	704.68
02_OXRSH1	no_N_12	0.775282	159.24	708.62
02_OXRSH1	no_N_12	0.774479	181.33	804.05
02_OXRSH1	no_N_12	0.702124	160.15	537.64
02_OXRSH1	no_N_12	0.716135	253.33	892.43
02_OXRSH1	no_N_12	0.762492	35.4	149.09
02_OXRSH1	no_N_12	0.515797	250.89	518.15
02_OXRSH1	no_N_12	0.744788	222.44	871.59
02_OXRSH1	no_N_12	0.73148	222.34	828.02
02_OXRSH1	no_N_12	0.667895	209.11	629.65
02_OXRSH1	no_N_12	0.697025	171.39	565.69
02_OXRSH1	no_N_12	0.658649	278.3	815.32
02_OXRSH1	no_N_12	0.748101	193.97	770.07
02_OXRSH1	no_N_12	0.754875	221.5	903.62
02_OXRSH1	no_N_12	0.712363	233.59	812.1
02_OXRSH1	no_N_12	0.705854	186.83	635.16
02_OXRSH1	no_N_12	0.694572	246.59	807.36
02_OXRSH1	no_N_12	0.66122	195.3	576.48
02_OXRSH1	no_N_12	0.699476	166.89	555.33
02_OXRSH1	no_N_12	0.736819	166.37	632.15
02_OXRSH1	no_N_12	0.415343	333.43	570.3
02_OXRSH1	no_N_12	0.794121	142.47	692.01
02_OXRSH1	no_N_12	0.647516	169.28	480.22
02_OXRSH1	no_N_12	0.718347	166.04	589.52
02_OXRSH1	no_N_12	0.763546	196.2	829.76
02_OXRSH1	no_N_12	0.697692	154.8	512.06
02_OXRSH1	no_N_12	0.650468	202.69	579.89
02_OXRSH1	no_N_12	0.647164	132.67	376.01
02_OXRSH1	no_N_12	0.651137	214.39	614.51
02_OXRSH1	no_N_12	0.72895	163.21	602.14
02_OXRSH1	no_N_12	0.713191	62.14	216.66
02_OXRSH1	no_N_12	0.719057	108.43	385.95
02_OXRSH1	no_N_12	0.790787	146.14	698.57
02_OXRSH1	no_N_12	0.732075	184.93	690.23
02_OXRSH1	no_N_12	0.641057	164.78	459.07
02_OXRSH1	no_N_12	0.725611	199.81	728.2
02_OXRSH1	no_N_12	0.749076	148.68	592.53
02_OXRSH1	no_N_12	0.69779	214.56	709.97
02_OXRSH1	no_N_12	0.723747	203.93	738.2
02_OXRSH1	no_N_12	0.781733	174	797.19
02_OXRSH1	no_N_12	0.74271	87.71	340.9
02_OXRSH1	no_N_12	0.726616	79.8	291.86
