# Supplementary material for: A guanosine tetraphosphate (ppGpp) mediated brake on photosynthesis is required for acclimation to nitrogen limitation in Arabidopsis
Source: eLife journal article supplement (doi:10.7554/elife.75041), 2022-02-14
Supplement: fig2-data1 [file Fig_2_supp_1B_data.xlsx]

## Sheet: Sheet1
Line	Day	Fv/Fm	Fo	Fm
01_COL	12	0.729797	196.97	728.97
01_COL	12	0.728737	165.88	611.51
01_COL	12	0.689714	159.4	513.72
01_COL	12	0.201402	207.38	259.68
01_COL	12	0.73002	191.06	707.72
01_COL	12	0.68553	148.65	472.7
01_COL	12	0.74033	158.23	609.35
01_COL	12	0.693526	164.16	535.64
01_COL	12	0.353102	234.85	363.04
01_COL	12	0.184902	247.04	303.08
01_COL	12	0.586328	219.66	531
01_COL	12	0.724652	173.07	628.55
01_COL	12	0.733981	172.84	649.69
01_COL	12	0.673668	143.88	440.87
01_COL	12	0.630668	176.83	478.81
01_COL	12	0.657697	216.37	632.13
01_COL	12	0.694274	169.25	553.6
01_COL	12	0.699506	176.85	588.53
01_COL	12	0.426802	256.38	447.28
01_COL	12	0.227909	311.84	403.89
01_COL	12	0.704225	196.04	662.8
01_COL	12	0.263671	309.84	420.79
01_COL	12	0.752196	172.38	695.63
01_COL	12	0.519918	251.51	523.89
01_COL	12	0.577291	209.42	495.4
01_COL	12	0.232006	244.99	319
01_COL	12	0.649943	191.88	548.11
01_COL	12	0.288409	204.06	286.78
01_COL	12	0.333808	191.75	287.83
01_COL	12	0.694087	191.22	625.08
01_COL	12	0.679338	213.42	665.56
01_COL	12	0.673995	200.47	614.93
01_COL	12	0.729803	181.44	671.51
01_COL	12	0.670169	191.49	580.57
01_COL	12	0.75359	151.02	612.88
01_COL	12	0.562293	178.44	407.67
01_COL	12	0.526698	247.22	522.33
01_COL	12	0.176556	233.15	283.14
01_COL	12	0.54558	82.2	180.89
01_COL	12	0.491571	102.84	202.27
01_COL	12	0.322647	248.04	366.19
01_COL	12	0.69506	187.42	614.58
01_COL	12	0.728636	216.51	797.82
01_COL	12	0.723583	200.93	726.91
01_COL	12	0.687585	195.41	625.45
01_COL	12	0.744883	233.58	915.58
01_COL	12	0.639909	184.5	512.37
01_COL	12	0.62288	188.56	500
01_COL	12	0.754795	179.99	734.04
01_COL	12	0.633223	160.63	437.95
01_COL	12	0.734888	178.46	673.15
01_COL	12	0.681119	225.43	706.94
01_COL	12	0.474563	229.39	436.57
01_COL	12	0.701374	182.75	611.97
01_COL	12	0.687703	204.53	654.89
01_COL	12	0.732171	188.45	703.62
01_COL	12	0.72942	196.43	725.96
01_COL	12	0.71471	189.06	662.66
01_COL	12	0.752945	166.52	673.98
01_COL	12	0.602022	140.53	353.11
01_COL	12	0.706159	186.73	635.48
01_COL	12	0.729853	189.9	702.95
01_COL	12	0.736188	183.03	693.79
01_COL	12	0.66835	185.91	560.53
01_COL	12	0.713881	210.95	737.28
01_COL	12	0.699379	200.43	666.72
01_COL	12	0.689231	165.82	533.58
01_COL	12	0.637694	170.86	471.59
01_COL	12	0.749531	145.68	581.63
01_COL	12	0.451486	214.99	391.95
01_COL	12	0.590074	210.05	512.41
01_COL	12	0.687723	201.55	645.42
01_COL	12	0.724211	192.79	699.05
01_COL	12	0.725926	199.64	728.38
01_COL	12	0.730086	174.36	646.02
01_COL	12	0.666755	176.58	529.88
01_COL	12	0.427252	221.98	387.57
01_COL	12	0.312174	179.43	260.88
01_COL	12	0.730944	187.47	696.77
01_COL	12	0.73739	191.81	730.4
01_COL	12	0.703488	181	610.43
01_COL	12	0.158135	288.28	342.43
01_COL	12	0.727385	198.3	727.4
01_COL	12	0.514171	164.23	338.02
01_COL	12	0.662492	175.97	521.38
01_COL	12	0.71843	191.03	678.41
01_COL	12	0.709905	162.52	560.23
01_COL	12	0.47463	214.34	407.96
01_COL	12	0.726176	198.29	724.15
01_COL	12	0.733158	178.39	668.56
01_COL	12	0.68729	197.79	632.47
01_COL	12	0.721594	194.67	699.23
01_COL	12	0.714938	204.62	717.81
01_COL	12	0.727629	54.15	198.81
01_COL	12	0.259259	147.81	199.53
01_COL	12	0.757998	177.09	731.77
01_COL	12	0.695611	181.16	595.16
01_COL	12	0.323087	249.07	367.95
02_SM2.	12	0.770619	174.14	759.13
02_SM2.	12	0.781324	147.23	673.28
02_SM2.	12	0.754355	120.43	490.26
02_SM2.	12	0.732025	179.87	671.22
02_SM2.	12	0.755742	199.81	818.03
02_SM2.	12	0.412351	206.96	352.2
02_SM2.	12	0.737809	152.64	582.21
02_SM2.	12	0.733444	206.77	775.71
02_SM2.	12	0.526847	199.33	421.28
02_SM2.	12	0.742916	142.9	555.85
02_SM2.	12	0.727002	145.71	533.74
02_SM2.	12	0.730121	186.26	690.16
02_SM2.	12	0.624405	241.38	642.66
02_SM2.	12	0.709476	190.36	655.23
02_SM2.	12	0.77024	158.18	688.5
02_SM2.	12	0.740215	158.57	610.39
02_SM2.	12	0.765629	220.06	938.94
02_SM2.	12	0.773834	134	592.53
02_SM2.	12	0.770865	172.83	754.27
02_SM2.	12	0.444395	100.67	181.19
02_SM2.	12	0.665951	214.67	642.63
02_SM2.	12	0.46704	347.01	651.1
02_SM2.	12	0.438161	214.01	380.91
02_SM2.	12	0.705451	229.2	778.14
02_SM2.	12	0.613097	224.82	581.05
02_SM2.	12	0.762198	179.93	756.68
02_SM2.	12	0.723297	160.64	580.55
02_SM2.	12	0.712474	83.44	290.2
02_SM2.	12	0.504791	87.35	176.39
02_SM2.	12	0.687207	108.17	345.82
02_SM2.	12	0.698781	213.26	707.99
02_SM2.	12	0.734453	214.01	805.92
02_SM2.	12	0.78322	190.99	881.03
02_SM2.	12	0.664417	190.46	567.55
02_SM2.	12	0.456386	208.9	384.28
02_SM2.	12	0.714209	180.08	630.11
02_SM2.	12	0.398201	283.73	471.47
02_SM2.	12	0.661509	162.53	480.16
02_SM2.	12	0.607113	208.14	529.77
02_SM2.	12	0.729722	193.22	714.93
02_SM2.	12	0.671251	161.36	490.83
02_SM2.	12	0.553448	182.26	408.15
02_SM2.	12	0.664457	145.27	432.94
02_SM2.	12	0.535268	191.07	411.14
02_SM2.	12	0.787813	111.5	525.48
02_SM2.	12	0.719684	163.49	583.2
02_SM2.	12	0.714407	145.09	508.03
02_SM2.	12	0.609924	199.29	510.9
02_SM2.	12	0.338562	210.41	318.11
02_SM2.	12	0.3984	449.72	747.54
02_SM2.	12	0.736613	191.98	728.89
02_SM2.	12	0.712259	193.67	673.07
02_SM2.	12	0.606999	192.7	490.33
02_SM2.	12	0.714752	198.33	695.29
02_SM2.	12	0.708508	135.2	463.82
02_SM2.	12	0.709945	206.27	711.14
02_SM2.	12	0.682639	192.34	606.06
02_SM2.	12	0.73529	154.71	584.45
02_SM2.	12	0.614141	240.83	624.14
02_SM2.	12	0.733695	181.79	682.6
02_SM2.	12	0.671742	189.28	576.62
02_SM2.	12	0.701067	151.26	506
02_SM2.	12	0.498712	165.4	329.95
02_SM2.	12	0.723461	150.17	543.07
02_SM2.	12	0.485401	164.08	318.85
02_SM2.	12	0.328143	141.09	210
02_SM2.	12	0.700179	152.27	507.87
02_SM2.	12	0.708645	133.26	457.38
02_SM2.	12	0.486559	244.29	475.79
02_SM2.	12	0.730812	204.17	758.43
02_SM2.	12	0.698283	217.01	719.25
02_SM2.	12	0.640155	173.33	481.68
02_SM2.	12	0.28054	212.15	294.86
02_SM2.	12	0.717181	118.21	417.97
02_SM2.	12	0.743658	158.55	618.51
02_SM2.	12	0.693885	158.43	517.55
02_SM2.	12	0.741937	184.75	715.91
02_SM2.	12	0.704036	182.66	617.17
02_SM2.	12	0.516657	212.27	439.15
02_SM2.	12	0.790485	121.28	578.86
02_SM2.	12	0.689029	206.27	663.31
02_SM2.	12	0.750484	162.33	650.58
02_SM2.	12	0.639633	161.74	448.82
03_SM3.	12	0.606252	201.54	511.85
03_SM3.	12	0.764403	104.69	444.36
03_SM3.	12	0.792374	144.62	696.54
03_SM3.	12	0.621184	176.2	465.16
03_SM3.	12	0.798075	148.36	734.73
03_SM3.	12	0.771986	113.43	497.47
03_SM3.	12	0.773712	145.55	643.25
03_SM3.	12	0.649046	92.35	263.14
03_SM3.	12	0.5922	109.38	268.22
03_SM3.	12	0.65485	85	246.27
03_SM3.	12	0.425364	130.54	227.17
03_SM3.	12	0.789145	99.07	469.85
03_SM3.	12	0.652277	174.47	501.75
03_SM3.	12	0.515274	143.3	295.61
03_SM3.	12	0.793763	148.98	722.42
03_SM3.	12	0.545866	152.63	336.09
03_SM3.	12	0.801841	102.02	514.84
03_SM3.	12	0.614051	106.19	275.14
03_SM3.	12	0.795143	124.67	608.57
03_SM3.	12	0.704977	55.43	187.85
03_SM3.	12	0.743888	94.79	370.15
03_SM3.	12	0.786505	109.98	515.14
03_SM3.	12	0.801812	152.04	767.1
03_SM3.	12	0.80424	124.28	634.91
03_SM3.	12	0.796006	141.35	692.96
03_SM3.	12	0.758262	110.82	458.43
03_SM3.	12	0.399986	175.69	292.81
03_SM3.	12	0.567082	169.02	390.42
03_SM3.	12	0.762275	113.05	475.55
03_SM3.	12	0.601296	143.39	359.64
03_SM3.	12	0.784926	39.75	184.82
03_SM3.	12	0.575664	121.07	285.34
03_SM3.	12	0.672637	131.6	402
03_SM3.	12	0.797885	151.98	751.95
03_SM3.	12	0.378299	219.28	352.71
03_SM3.	12	0.783482	169.29	781.92
03_SM3.	12	0.793895	129.16	626.67
03_SM3.	12	0.78568	121.42	566.49
03_SM3.	12	0.501742	117.3	235.42
03_SM3.	12	0.800679	131.59	660.19
03_SM3.	12	0.624413	146.31	389.55
03_SM3.	12	0.777108	123.95	556.1
03_SM3.	12	0.789305	102.63	487.15
03_SM3.	12	0.564348	173.59	398.46
03_SM3.	12	0.795256	140.51	686.27
03_SM3.	12	0.754297	153.09	623.07
03_SM3.	12	0.748708	123.47	491.34
03_SM3.	12	0.772246	108.47	476.26
03_SM3.	12	0.790664	126.55	604.53
03_SM3.	12	0.785313	111.85	520.99
03_SM3.	12	0.782418	112.96	519.16
03_SM3.	12	0.514241	223.93	460.99
03_SM3.	12	0.760934	115.88	484.72
03_SM3.	12	0.788669	143.13	677.23
03_SM3.	12	0.785509	158	736.58
03_SM3.	12	0.799117	131.53	654.76
03_SM3.	12	0.756093	99.78	409.05
03_SM3.	12	0.79647	119.24	585.86
03_SM3.	12	0.735646	120.54	455.98
03_SM3.	12	0.750459	135.98	544.92
03_SM3.	12	0.61348	198.13	512.6
03_SM3.	12	0.454791	116.92	214.45
03_SM3.	12	0.798704	110.91	551.03
03_SM3.	12	0.802777	121.16	614.28
03_SM3.	12	0.678865	161.21	502
03_SM3.	12	0.806523	133.75	691.35
03_SM3.	12	0.765777	104.65	446.84
03_SM3.	12	0.65847	148.34	434.34
03_SM3.	12	0.67303	149.53	457.32
03_SM3.	12	0.478085	104.43	200.09
03_SM3.	12	0.772103	113.53	498.12
03_SM3.	12	0.812388	48.22	257.02
03_SM3.	12	0.760324	159.38	664.94
03_SM3.	12	0.745769	99.9	392.91
03_SM3.	12	0.778915	141.93	641.97
03_SM3.	12	0.602087	142.21	357.39
03_SM3.	12	0.787049	118.16	554.87
03_SM3.	12	0.805764	125.57	646.43
03_SM3.	12	0.796098	124.05	608.38
03_SM3.	12	0.794143	116.41	565.49
03_SM3.	12	0.604573	68.31	172.75
03_SM3.	12	0.756498	110.18	452.48
03_SM3.	12	0.470035	87.9	165.86
03_SM3.	12	0.801338	125.95	633.99
03_SM3.	12	0.547586	148.61	328.46
03_SM3.	12	0.79087	110.31	527.47
03_SM3.	12	0.526638	174.05	367.71
03_SM3.	12	0.786641	120.36	564.12
03_SM3.	12	0.360249	165.66	258.96
03_SM3.	12	0.666208	123.79	370.86
03_SM3.	12	0.622413	68.77	182.13
03_SM3.	12	0.646262	161.63	456.92
03_SM3.	12	0.784443	125.63	582.77
03_SM3.	12	0.666469	106.79	320.18
03_SM3.	12	0.794055	125.62	609.97
03_SM3.	12	0.682326	128.62	404.88
03_SM3.	12	0.587555	56.74	137.57
03_SM3.	12	0.792063	116.21	558.92
03_SM3.	12	0.773203	94.74	417.73
03_SM3.	12	0.447406	134.33	243.09
03_SM3.	12	0.519987	102.07	212.64
03_SM3.	12	0.77426	72.72	322.14
03_SM3.	12	0.526336	162.32	342.69
03_SM3.	12	0.650973	73.33	210.07
04_DM23	12	0.819191	128.66	711.58
04_DM23	12	0.833097	101.19	606.28
04_DM23	12	0.818002	138.83	762.81
04_DM23	12	0.832945	78.21	468.17
04_DM23	12	0.797738	108.73	537.57
04_DM23	12	0.590753	116.57	284.84
04_DM23	12	0.632038	100.76	273.86
04_DM23	12	0.821722	119.48	670.19
04_DM23	12	0.837389	63.41	389.95
04_DM23	12	0.804049	34.75	177.34
04_DM23	12	0.807778	114.08	593.48
04_DM23	12	0.823967	109.66	622.95
04_DM23	12	0.828975	110.26	644.76
04_DM23	12	0.803241	91.78	466.46
04_DM23	12	0.708773	144.29	495.49
04_DM23	12	0.791716	81.61	391.82
04_DM23	12	0.719113	144.71	515.19
04_DM23	12	0.744965	43.18	169.31
04_DM23	12	0.715971	46.22	162.73
04_DM23	12	0.552693	95.16	212.74
04_DM23	12	0.817162	128.57	703.19
04_DM23	12	0.82852	107.55	627.13
04_DM23	12	0.805257	106.62	547.44
04_DM23	12	0.753256	134.12	543.56
04_DM23	12	0.763331	116.82	493.6
04_DM23	12	0.768086	116.58	502.73
04_DM23	12	0.770053	70.32	305.81
04_DM23	12	0.796384	51.8	254.4
04_DM23	12	0.789737	54.21	257.82
04_DM23	12	0.782705	42.24	194.39
04_DM23	12	0.820575	103.35	575.95
04_DM23	12	0.813101	134.35	718.89
04_DM23	12	0.824066	106.38	604.66
04_DM23	12	0.831429	93.53	554.84
04_DM23	12	0.828803	97.18	567.65
04_DM23	12	0.819495	117.7	652.06
04_DM23	12	0.827598	79.56	461.48
04_DM23	12	0.822177	103.95	584.57
04_DM23	12	0.819003	142.74	788.63
04_DM23	12	0.727175	141.58	518.94
04_DM23	12	0.714003	156.21	546.23
04_DM23	12	0.822666	116.64	657.8
04_DM23	12	0.825894	106.53	611.87
04_DM23	12	0.766918	57.53	246.78
04_DM23	12	0.802602	53.71	272.09
04_DM23	12	0.816201	154.7	841.68
04_DM23	12	0.799326	115.45	575.31
04_DM23	12	0.755139	108.17	441.76
04_DM23	12	0.828126	88.12	512.7
04_DM23	12	0.774724	120.16	533.39
04_DM23	12	0.742295	78.19	303.37
04_DM23	12	0.829482	87.15	511.09
04_DM23	12	0.795693	37.56	183.89
04_DM23	12	0.81596	33.8	183.71
04_DM23	12	0.793202	44.78	216.54
04_DM23	12	0.829527	91.68	537.74
04_DM23	12	0.564946	106.04	243.74
04_DM23	12	0.825128	113.81	650.82
04_DM23	12	0.808621	109.89	574.2
04_DM23	12	0.787195	79.25	372.36
04_DM23	12	0.755485	69.77	285.34
04_DM23	12	0.82836	90.54	527.5
04_DM23	12	0.772251	35.9	157.63
04_DM23	12	0.829747	84.1	493.97
04_DM23	12	0.824954	108.53	620.01
04_DM23	12	0.835815	79.39	483.54
04_DM23	12	0.713529	56.26	196.39
04_DM23	12	0.830145	94.03	553.59
04_DM23	12	0.751243	97.57	392.23
04_DM23	12	0.830974	90.49	535.36
04_DM23	12	0.751948	87.86	354.2
04_DM23	12	0.809479	81.4	427.25
04_DM23	12	0.77365	51.19	226.11
04_DM23	12	0.789369	51.91	246.45
04_DM23	12	0.832899	81.43	487.31
04_DM23	12	0.829447	64.58	378.65
04_DM23	12	0.824373	82.81	471.51
04_DM23	12	0.814833	98.31	530.98
04_DM23	12	0.774021	94.51	418.18
04_DM23	12	0.841594	76.96	485.84
04_DM23	12	0.721956	68.56	246.58
04_DM23	12	0.765329	79.14	337.28
04_DM23	12	0.721409	79.34	284.79
04_DM23	12	0.837247	95.65	587.7
04_DM23	12	0.838271	91.77	567.43
04_DM23	12	0.745522	83.97	329.97
04_DM23	12	0.834807	79.39	480.65
04_DM23	12	0.829813	102.25	600.81
04_DM23	12	0.834043	83.86	505.25
04_DM23	12	0.821614	106.04	594.44
04_DM23	12	0.829145	69.83	408.71
04_DM23	12	0.746052	63.03	248.2
05_C11.	12	0.688103	182.46	585
05_C11.	12	0.753533	158.17	641.75
05_C11.	12	0.712299	172.14	598.33
05_C11.	12	0.645617	159.77	450.84
05_C11.	12	0.686484	161.74	515.89
05_C11.	12	0.705476	156.89	532.69
05_C11.	12	0.745943	169.55	667.41
05_C11.	12	0.731169	162.82	605.66
05_C11.	12	0.64368	197.86	555.26
05_C11.	12	0.705954	179.77	611.4
05_C11.	12	0.696826	186.81	616.18
05_C11.	12	0.696396	161.25	531.12
05_C11.	12	0.695805	188.89	620.95
05_C11.	12	0.727136	166.78	611.22
05_C11.	12	0.698447	179.18	594.19
05_C11.	12	0.729476	188.52	696.87
05_C11.	12	0.734107	164.67	619.31
05_C11.	12	0.716318	192.78	679.6
05_C11.	12	0.711071	189.76	656.77
05_C11.	12	0.620027	146.02	384.29
05_C11.	12	0.742384	152.55	592.16
05_C11.	12	0.672062	154.79	472.04
05_C11.	12	0.729623	167.85	620.8
05_C11.	12	0.734813	188.1	709.31
05_C11.	12	0.69588	149.18	490.53
05_C11.	12	0.750135	166.11	664.8
05_C11.	12	0.660639	176.23	519.3
05_C11.	12	0.710122	146.71	506.11
05_C11.	12	0.656447	177.16	515.67
05_C11.	12	0.648434	155.08	441.14
05_C11.	12	0.561415	202.85	462.51
05_C11.	12	0.708669	167.98	576.63
05_C11.	12	0.741369	173.8	671.96
05_C11.	12	0.67184	156.69	477.45
05_C11.	12	0.753169	155.59	630.35
05_C11.	12	0.666448	172.77	517.97
05_C11.	12	0.643354	181.39	508.6
05_C11.	12	0.648367	158.85	451.75
05_C11.	12	0.613095	162.38	419.69
05_C11.	12	0.743425	144.48	563.11
05_C11.	12	0.613343	71.69	185.41
05_C11.	12	0.742143	180.41	699.69
05_C11.	12	0.738156	178.25	680.75
05_C11.	12	0.663392	140.48	417.37
05_C11.	12	0.397772	294.07	488.32
05_C11.	12	0.444827	154.86	278.94
05_C11.	12	0.671566	148.16	451.11
05_C11.	12	0.726794	160.97	589.19
05_C11.	12	0.512401	199.94	410.05
05_C11.	12	0.609636	171.37	439
05_C11.	12	0.588183	69.97	169.93
05_C11.	12	0.194869	229.43	284.96
05_C11.	12	0.621645	78.24	206.79
05_C11.	12	0.489918	170.24	333.75
05_C11.	12	0.744363	171.1	669.27
05_C11.	12	0.59063	182.29	445.27
05_C11.	12	0.676677	135.12	417.91
05_C11.	12	0.685905	142.9	454.99
05_C11.	12	0.750994	166.63	669.18
05_C11.	12	0.739418	166.89	640.45
05_C11.	12	0.716552	164.59	580.67
05_C11.	12	0.579348	200.27	476.07
05_C11.	12	0.684802	142.52	452.16
05_C11.	12	0.399394	214.03	356.34
05_C11.	12	0.665283	191.93	573.41
05_C11.	12	0.666813	174.75	524.48
05_C11.	12	0.727727	173.86	638.55
05_C11.	12	0.732617	148.09	553.85
05_C11.	12	0.66323	156.8	465.6
05_C11.	12	0.733726	147.54	554.09
05_C11.	12	0.530333	206.09	438.8
05_C11.	12	0.508402	205.95	418.94
05_C11.	12	0.749131	140.77	561.09
05_C11.	12	0.713375	156.37	545.59
05_C11.	12	0.642719	57.29	160.35
05_C11.	12	0.740527	145.17	559.48
05_C11.	12	0.742826	172.24	669.74
05_C11.	12	0.703892	185.87	627.71
05_C11.	12	0.752299	140.35	566.61
05_C11.	12	0.735638	221.3	837.11
05_C11.	12	0.705851	179.84	611.39
05_C11.	12	0.706799	177.46	605.25
05_C11.	12	0.688911	138.17	444.15
05_C11.	12	0.520422	158.16	329.79
05_C11.	12	0.682875	163.96	517.02
05_C11.	12	0.60776	168.73	430.17
05_C11.	12	0.562884	165.82	379.35
05_C11.	12	0.682451	144.11	453.82
05_C11.	12	0.677595	160.98	499.31
05_C11.	12	0.669702	174.08	527.04
05_C11.	12	0.735292	154.33	583.02
05_C11.	12	0.698487	167.56	555.73
05_C11.	12	0.700538	162.12	541.37
05_C11.	12	0.70064	190.86	637.56
05_C11.	12	0.724675	148.37	538.89
05_C11.	12	0.529337	185.46	394.04
05_C11.	12	0.69672	196.14	646.73
05_C11.	12	0.723789	147.56	534.23
05_C11.	12	0.742038	144.58	560.47
05_C11.	12	0.739172	167.9	643.72
05_C11.	12	0.734579	183.05	689.66
05_C11.	12	0.739146	159.4	611.07
05_C11.	12	0.711803	159.21	552.4
05_C11.	12	0.676249	148.33	458.13
05_C11.	12	0.733823	137.84	517.85
05_C11.	12	0.727399	178.07	653.19
05_C11.	12	0.732351	171.02	638.97
05_C11.	12	0.684529	156.54	496.21
06_C43.	12	0.703965	305.6	1032.31
06_C43.	12	0.704533	253.23	857.05
06_C43.	12	0.725365	225.44	820.87
06_C43.	12	0.712752	225.88	786.36
06_C43.	12	0.730811	195.31	725.55
06_C43.	12	0.355678	262.6	407.56
06_C43.	12	0.63231	157.57	428.54
06_C43.	12	0.712574	197.17	686.02
06_C43.	12	0.268413	319.25	436.38
06_C43.	12	0.261033	200.94	271.92
06_C43.	12	0.175905	198.92	241.38
06_C43.	12	0.631176	232.4	630.11
06_C43.	12	0.378822	231.19	372.18
06_C43.	12	0.619749	278.91	733.49
06_C43.	12	0.596964	229.13	568.51
06_C43.	12	0.66877	210.5	635.48
06_C43.	12	0.271103	251.72	345.33
06_C43.	12	0.193995	246.17	305.42
06_C43.	12	0.259896	287.75	388.81
06_C43.	12	0.225948	289.24	373.67
06_C43.	12	0.473398	85.33	162.02
06_C43.	12	0.699034	244.83	813.48
06_C43.	12	0.675769	244.82	755.08
06_C43.	12	0.68761	175.41	561.51
06_C43.	12	0.463163	244.32	455.11
06_C43.	12	0.675721	211.19	651.26
06_C43.	12	0.582266	177.7	425.39
06_C43.	12	0.66638	213.73	640.64
06_C43.	12	0.727599	194.2	712.92
06_C43.	12	0.658413	203.49	595.72
06_C43.	12	0.688327	269.12	863.47
06_C43.	12	0.680175	262.88	821.95
06_C43.	12	0.582903	183.36	439.61
06_C43.	12	0.700763	198.96	664.89
06_C43.	12	0.497555	209.65	417.26
06_C43.	12	0.491051	216.4	425.17
06_C43.	12	0.641546	186.74	520.96
06_C43.	12	0.417707	125.41	215.39
06_C43.	12	0.668695	122.51	369.75
06_C43.	12	0.662306	280.86	831.7
06_C43.	12	0.724617	242.36	880.12
06_C43.	12	0.719542	222.65	793.88
06_C43.	12	0.699928	236.64	788.61
06_C43.	12	0.689565	211.22	680.4
06_C43.	12	0.73606	172.25	652.61
06_C43.	12	0.715802	195.74	688.78
06_C43.	12	0.635946	156.9	430.98
06_C43.	12	0.232397	317.12	413.13
06_C43.	12	0.52694	228.19	482.37
06_C43.	12	0.370204	102.26	162.37
06_C43.	12	0.728634	239.25	881.65
06_C43.	12	0.627023	226.99	608.59
06_C43.	12	0.614678	259.31	672.97
06_C43.	12	0.670095	254.36	771.01
06_C43.	12	0.721276	203.8	731.19
06_C43.	12	0.52087	218.33	455.68
06_C43.	12	0.732173	181.94	679.32
06_C43.	12	0.431112	252.74	444.27
06_C43.	12	0.704542	271.08	917.49
06_C43.	12	0.722046	226.16	813.66
06_C43.	12	0.701405	228.85	766.39
06_C43.	12	0.689322	247.63	797.03
06_C43.	12	0.325503	292.88	434.22
06_C43.	12	0.268662	348.87	477.03
06_C43.	12	0.661602	206	608.78
06_C43.	12	0.559997	278.79	633.61
06_C43.	12	0.415322	124.25	212.51
06_C43.	12	0.737435	191.99	731.21
06_C43.	12	0.697262	226.43	747.94
06_C43.	12	0.340139	216.54	328.16
06_C43.	12	0.649492	169.05	482.3
06_C43.	12	0.582984	260.81	625.42
06_C43.	12	0.742516	127.47	495.06
06_C43.	12	0.562975	179.54	410.8
06_C43.	12	0.63791	215.82	596.04
06_C43.	12	0.711863	221.07	767.24
06_C43.	12	0.567863	232.67	538.44
06_C43.	12	0.450572	194.36	353.75
06_C43.	12	0.577731	213.56	505.72
06_C43.	12	0.528758	185.34	393.28
06_C43.	12	0.327446	267.71	398.05
06_C43.	12	0.675262	166.49	512.69
06_C43.	12	0.268047	178.15	243.39
06_C43.	12	0.348742	246.26	378.13
06_C43.	12	0.703993	279.54	944.37
06_C43.	12	0.722852	208.48	752.27
06_C43.	12	0.738746	219.31	839.45
06_C43.	12	0.727555	195.68	718.2
06_C43.	12	0.173446	295.65	357.69
06_C43.	12	0.58871	200.94	488.56
06_C43.	12	0.567582	180.84	418.23
06_C43.	12	0.28822	177.71	249.67
06_C43.	12	0.759348	41.9	174.11
07_C131	12	0.679158	213.02	663.94
07_C131	12	0.641902	231.17	645.55
07_C131	12	0.693602	169.95	554.67
07_C131	12	0.680635	211.26	661.5
07_C131	12	0.282393	231.5	322.6
07_C131	12	0.709763	172.7	595.03
07_C131	12	0.615101	197.08	512.03
07_C131	12	0.709055	175.6	603.55
07_C131	12	0.499923	193.87	387.68
07_C131	12	0.750834	204.66	821.38
07_C131	12	0.718902	223.22	794.1
07_C131	12	0.710158	179.25	618.44
07_C131	12	0.691269	178.86	579.34
07_C131	12	0.257226	236.67	318.63
07_C131	12	0.673028	189.31	579.01
07_C131	12	0.62527	180.48	481.6
07_C131	12	0.520943	293.14	611.91
07_C131	12	0.740075	207.95	800.04
07_C131	12	0.557887	133.58	302.14
07_C131	12	0.380652	237.38	383.29
07_C131	12	0.758897	191.59	794.64
07_C131	12	0.403941	144.89	243.08
07_C131	12	0.68329	163.22	515.33
07_C131	12	0.770384	109.97	478.93
07_C131	12	0.730657	170.68	633.69
07_C131	12	0.461327	215.13	399.37
07_C131	12	0.752736	186.85	755.67
07_C131	12	0.740209	178.1	685.55
07_C131	12	0.761792	189.58	795.86
07_C131	12	0.680329	218.31	682.92
07_C131	12	0.713241	186.68	651
07_C131	12	0.719659	179.71	641.04
07_C131	12	0.375098	167.34	267.77
07_C131	12	0.725856	169.58	618.58
07_C131	12	0.687431	228.31	730.43
07_C131	12	0.717575	207.09	733.22
07_C131	12	0.750132	189.16	757.04
07_C131	12	0.410911	264.99	449.83
07_C131	12	0.651366	217.53	623.95
07_C131	12	0.773602	186.42	823.46
07_C131	12	0.742264	186.98	725.47
07_C131	12	0.736139	196.84	746
07_C131	12	0.659291	212.81	624.61
07_C131	12	0.758874	189.46	785.73
07_C131	12	0.656644	188.08	547.77
07_C131	12	0.75191	185.69	748.52
07_C131	12	0.671705	208.96	636.5
07_C131	12	0.759458	157.62	655.27
07_C131	12	0.711465	171.09	592.96
07_C131	12	0.724559	178.72	648.85
07_C131	12	0.729963	182.2	674.76
07_C131	12	0.730607	179.13	664.94
07_C131	12	0.701631	128.77	431.58
07_C131	12	0.717387	212.72	752.69
07_C131	12	0.738164	166.85	637.23
07_C131	12	0.466794	290.16	544.18
07_C131	12	0.689809	135.33	436.28
07_C131	12	0.292117	312.58	441.57
07_C131	12	0.753564	178.04	722.46
07_C131	12	0.706721	179.51	612.08
07_C131	12	0.800207	142.58	713.64
07_C131	12	0.377912	198.44	318.99
07_C131	12	0.462134	152.26	283.1
07_C131	12	0.531075	235.71	502.66
07_C131	12	0.656951	153.83	448.42
07_C131	12	0.531559	237.57	507.15
07_C131	12	0.729668	146.52	542
07_C131	12	0.697425	168.95	558.34
07_C131	12	0.697694	176.74	584.64
07_C131	12	0.729732	189.32	700.49
07_C131	12	0.503331	237.08	477.34
07_C131	12	0.589616	159.82	389.44
07_C131	12	0.761133	197.67	827.53
07_C131	12	0.672578	146.42	447.16
07_C131	12	0.619788	210.47	553.56
07_C131	12	0.77601	166.83	744.81
07_C131	12	0.804777	42.09	215.6
07_C131	12	0.787119	129.4	607.85
07_C131	12	0.755721	155.31	635.79
07_C131	12	0.747235	175.29	693.49
07_C131	12	0.16992	287.05	345.81
07_C131	12	0.799781	36.57	182.7
07_C131	12	0.573936	193.22	453.5
07_C131	12	0.777187	54.44	244.33
08_CX3.	12	0.509773	372.68	760.22
08_CX3.	12	0.545131	308.46	678.13
08_CX3.	12	0.819217	96.84	535.67
08_CX3.	12	0.562812	312.83	715.55
08_CX3.	12	0.409893	333.93	565.88
08_CX3.	12	0.817767	80.23	440.26
08_CX3.	12	0.364201	349.81	550.19
08_CX3.	12	0.789425	56.55	268.55
08_CX3.	12	0.225541	251	324.11
08_CX3.	12	0.183964	235.41	288.48
08_CX3.	12	0.402183	503.81	842.75
08_CX3.	12	0.516263	370.32	765.54
08_CX3.	12	0.672155	247.53	754.99
08_CX3.	12	0.800198	92.91	465.06
08_CX3.	12	0.538797	265.63	575.95
08_CX3.	12	0.665959	286.25	856.93
08_CX3.	12	0.575918	300.93	709.58
08_CX3.	12	0.786119	75.9	354.87
08_CX3.	12	0.80659	80.54	416.42
08_CX3.	12	0.717454	57.83	204.71
08_CX3.	12	0.70729	59.83	204.4
08_CX3.	12	0.268125	195.33	266.89
08_CX3.	12	0.374191	387.92	619.87
08_CX3.	12	0.805836	138.13	711.41
08_CX3.	12	0.651426	285.96	820.37
08_CX3.	12	0.758969	89.15	369.87
08_CX3.	12	0.801363	74.29	374.05
08_CX3.	12	0.338372	376.84	569.58
08_CX3.	12	0.122608	352.14	401.36
08_CX3.	12	0.548494	247.8	548.83
08_CX3.	12	0.723295	58.75	212.32
08_CX3.	12	0.580722	219.97	524.64
08_CX3.	12	0.336486	106.62	160.69
08_CX3.	12	0.415282	213.9	365.8
08_CX3.	12	0.698256	44.13	146.25
08_CX3.	12	0.409351	166.38	281.69
08_CX3.	12	0.322348	236.06	348.35
08_CX3.	12	0.629346	277.06	747.49
08_CX3.	12	0.244444	174.09	230.4
08_CX3.	12	0.176028	300	364.09
08_CX3.	12	0.807273	124.23	644.59
08_CX3.	12	0.800755	86.07	431.98
08_CX3.	12	0.761359	98.63	413.34
08_CX3.	12	0.817764	119.27	654.48
08_CX3.	12	0.619051	268.4	704.53
08_CX3.	12	0.813005	99.73	533.33
08_CX3.	12	0.767556	93.21	401
08_CX3.	12	0.38591	539.81	879.04
08_CX3.	12	0.804689	147.04	752.85
08_CX3.	12	0.420945	468.71	809.44
08_CX3.	12	0.413275	454.96	775.44
08_CX3.	12	0.409621	501.84	850.03
08_CX3.	12	0.654866	238.37	690.66
08_CX3.	12	0.158398	348.29	413.83
08_CX3.	12	0.621205	354.93	936.97
08_CX3.	12	0.592189	333.1	816.8
08_CX3.	12	0.736126	195.66	741.49
08_CX3.	12	0.805979	136.83	705.18
08_CX3.	12	0.623723	288.04	765.5
08_CX3.	12	0.590575	325.01	793.82
08_CX3.	12	0.680533	260.72	816.11
08_CX3.	12	0.789727	61.08	290.48
08_CX3.	12	0.827279	89.15	516.15
08_CX3.	12	0.671016	243.55	740.31
08_CX3.	12	0.807696	80.06	416.32
08_CX3.	12	0.404461	304.91	511.99
08_CX3.	12	0.578955	324.95	771.77
08_CX3.	12	0.81482	61.49	332.11
08_CX3.	12	0.747345	58.53	231.62
08_CX3.	12	0.806332	121.66	628.19
08_CX3.	12	0.624153	281.07	747.83
08_CX3.	12	0.705244	204.38	693.42
08_CX3.	12	0.384677	405.11	658.37
08_CX3.	12	0.646213	259.34	733.04
08_CX3.	12	0.81594	118.38	643.16
08_CX3.	12	0.309768	339.87	492.4
08_CX3.	12	0.508047	372.61	757.43
08_CX3.	12	0.473861	202.2	384.29
08_CX3.	12	0.184367	295.83	362.7
08_CX3.	12	0.58603	337.42	815.06
08_CX3.	12	0.450885	415.4	756.49
08_CX3.	12	0.409131	437.17	739.86
08_CX3.	12	0.619303	210.07	551.83
08_CX3.	12	0.704567	69.49	235.18
08_CX3.	12	0.717701	199.43	706.45
08_CX3.	12	0.623566	244.74	650.18
08_CX3.	12	0.416624	453.89	778.04
08_CX3.	12	0.377367	278.18	446.78
08_CX3.	12	0.427778	411.22	718.62
08_CX3.	12	0.657221	208.31	607.71
08_CX3.	12	0.827869	95.87	556.96
08_CX3.	12	0.804053	41.97	214.14
08_CX3.	12	0.646422	276.49	781.95
08_CX3.	12	0.616603	293.41	765.29
08_CX3.	12	0.57277	223.78	523.77
08_CX3.	12	0.67782	217.41	674.84
08_CX3.	12	0.434165	370.82	655.35
08_CX3.	12	0.199842	181.82	227.23
08_CX3.	12	0.810572	45.87	242.15
