# Supplementary material for: A guanosine tetraphosphate (ppGpp) mediated brake on photosynthesis is required for acclimation to nitrogen limitation in Arabidopsis
Source: eLife journal article supplement (doi:10.7554/elife.75041), 2022-02-14
Supplement: fig2-data1 [file Fig_2_supp_1C_data.xlsx]

## Sheet: Sheet1
Line	Day	Fv/Fm	Fo	Fm
COL	12	0.604472	220.21	556.75
COL	12	0.71484	175.67	616.04
COL	12	0.775283	194.58	865.89
COL	12	0.775212	163.63	727.93
COL	12	0.776266	176.98	791.03
COL	12	0.438599	269.68	480.37
COL	12	0.649328	249.1	710.35
COL	12	0.613915	293.56	760.35
COL	12	0.551031	291.53	649.31
COL	12	0.375329	190.05	304.24
COL	12	0.773432	187.74	828.67
COL	12	0.733794	188.16	706.82
COL	12	0.660874	238.66	703.75
COL	12	0.715122	216.65	760.5
COL	12	0.383564	297.72	482.97
COL	12	0.734571	170.32	641.64
COL	12	0.647377	239.28	678.6
COL	12	0.418817	299.78	515.81
COL	12	0.460199	318.58	590.18
COL	12	0.4746	237.05	451.18
COL	12	0.312481	324	471.26
COL	12	0.202441	307.74	385.84
COL	12	0.769918	197.65	859.04
COL	12	0.77387	190.59	842.79
COL	12	0.770432	192.97	840.58
COL	12	0.765707	190.82	814.45
COL	12	0.776841	168.1	753.32
COL	12	0.767444	195.63	841.26
COL	12	0.423562	367.56	637.64
COL	12	0.699621	244.13	812.74
COL	12	0.38704	273.38	446
COL	12	0.775663	187.55	836.02
COL	12	0.767978	211.49	911.51
COL	12	0.788885	158.48	750.68
COL	12	0.776359	182.81	817.47
COL	12	0.772237	175.66	771.24
COL	12	0.697055	172.7	570.07
COL	12	0.551159	317.73	707.89
COL	12	0.786321	169.21	791.89
COL	12	0.766113	186.56	797.65
COL	12	0.769896	178.8	777.04
COL	12	0.766664	190.14	814.92
COL	12	0.764801	194.66	827.64
COL	12	0.688489	251.29	806.68
COL	12	0.635319	254.2	697.02
COL	12	0.767835	179.44	772.94
COL	12	0.733153	160.53	601.58
COL	12	0.448116	282.41	511.72
COL	12	0.766489	193.22	827.5
COL	12	0.325168	204.96	303.72
COL	12	0.674016	239.07	733.38
COL	12	0.435962	354.21	627.99
COL	12	0.449844	211.25	384
COL	12	0.767219	197.21	847.19
COL	12	0.777575	192.26	864.38
COL	12	0.765073	203.24	865.12
COL	12	0.785816	165.83	774.24
COL	12	0.599119	271.34	676.86
COL	12	0.570073	266.37	619.57
COL	12	0.772825	188.93	831.65
COL	12	0.470664	205.07	387.41
COL	12	0.771718	187.1	819.6
COL	12	0.23651	249.02	326.16
COL	12	0.769225	192.5	834.19
COL	12	0.760297	214.39	894.4
COL	12	0.769265	194.07	841.05
COL	12	0.767778	187.15	805.91
COL	12	0.77905	176.55	799.05
COL	12	0.70044	211.51	706.07
COL	12	0.63887	285.98	791.93
COL	12	0.598729	275.99	687.79
COL	12	0.655491	268.81	780.3
COL	12	0.540317	222.22	483.42
COL	12	0.774426	169.31	750.62
COL	12	0.780299	160.83	732.04
COL	12	0.591571	169.49	414.98
COL	12	0.7067	199.13	678.93
COL	12	0.772958	175.12	771.31
COL	12	0.76656	195.34	836.79
COL	12	0.339187	298.39	451.55
COL	12	0.684703	223.92	710.22
COL	12	0.705493	207.05	703.04
COL	12	0.358775	266.82	416.11
COL	12	0.698818	220.48	732.05
COL	12	0.437436	330.19	586.92
COL	12	0.770857	184.21	803.91
COL	12	0.65568	244.86	711.14
COL	12	0.688321	216.53	694.69
COL	12	0.727411	210.91	773.73
COL	12	0.430645	230.59	405.02
COL	12	0.77004	171.21	744.52
COL	12	0.532109	306.45	654.96
COL	12	0.790075	152.29	725.45
COL	12	0.79727	137.25	677.01
COL	12	0.784841	158.28	735.69
COL	12	0.78993	152.79	727.33
COL	12	0.690451	209.63	677.21
COL	12	0.789668	161.48	767.69
COL	12	0.697118	184.47	609.05
COL	12	0.44924	295.56	536.64
COL	12	0.431397	255.86	449.98
qrt1-2	12	0.790774	130.12	621.91
qrt1-2	12	0.787453	173.54	816.48
qrt1-2	12	0.647257	234.2	663.94
qrt1-2	12	0.69893	224.92	747.07
qrt1-2	12	0.610562	250.08	642.13
qrt1-2	12	0.432739	241.71	426.1
qrt1-2	12	0.791149	168.59	807.18
qrt1-2	12	0.61458	254.62	660.63
qrt1-2	12	0.685963	120	382.12
qrt1-2	12	0.79081	144.04	688.56
qrt1-2	12	0.741075	199.89	772
qrt1-2	12	0.696954	208.35	687.52
qrt1-2	12	0.418677	248.44	427.37
qrt1-2	12	0.653219	243.61	702.49
qrt1-2	12	0.561878	285.52	651.69
qrt1-2	12	0.747344	216.38	856.42
qrt1-2	12	0.762446	187.58	789.63
qrt1-2	12	0.654058	230.94	667.54
qrt1-2	12	0.735814	191.07	723.24
qrt1-2	12	0.231521	183.18	238.38
qrt1-2	12	0.774134	188.64	835.23
qrt1-2	12	0.585633	202	487.49
qrt1-2	12	0.788779	167.75	794.19
qrt1-2	12	0.706895	230.26	785.59
qrt1-2	12	0.717671	188.36	667.2
qrt1-2	12	0.727132	214.42	785.8
qrt1-2	12	0.78996	153.59	731.24
qrt1-2	12	0.686031	222.51	708.7
qrt1-2	12	0.461443	198.76	369.06
qrt1-2	12	0.754167	143.07	581.98
qrt1-2	12	0.24162	186.66	246.13
qrt1-2	12	0.225278	211.53	273.04
qrt1-2	12	0.542353	325.84	711.99
qrt1-2	12	0.70313	242.6	817.16
qrt1-2	12	0.569193	331.51	769.51
qrt1-2	12	0.622335	281.13	744.39
qrt1-2	12	0.663839	254.03	755.71
qrt1-2	12	0.770114	178.69	777.3
qrt1-2	12	0.774469	194.19	860.99
qrt1-2	12	0.65899	240.62	705.61
qrt1-2	12	0.615666	282.92	736.13
qrt1-2	12	0.711015	202.95	702.25
qrt1-2	12	0.690114	225.65	728.17
qrt1-2	12	0.781755	185.74	851.06
qrt1-2	12	0.703293	200.93	677.2
qrt1-2	12	0.773405	195.48	862.64
qrt1-2	12	0.776351	197.2	881.74
qrt1-2	12	0.774181	190.58	843.95
qrt1-2	12	0.698183	225.03	745.55
qrt1-2	12	0.770766	201.27	878.01
qrt1-2	12	0.699716	224.36	747.16
qrt1-2	12	0.236802	274.25	359.33
qrt1-2	12	0.793394	176.85	855.93
qrt1-2	12	0.784102	186.37	863.23
qrt1-2	12	0.776254	202.98	907.19
qrt1-2	12	0.764672	202.33	859.78
qrt1-2	12	0.720047	217.4	776.56
qrt1-2	12	0.77392	208.48	922.15
qrt1-2	12	0.786583	171.51	803.59
qrt1-2	12	0.710036	204.31	704.57
qrt1-2	12	0.404442	258.49	434.03
qrt1-2	12	0.355094	354.95	550.39
qrt1-2	12	0.600398	245.08	613.31
qrt1-2	12	0.794123	179.86	873.63
qrt1-2	12	0.716174	226.53	798.13
qrt1-2	12	0.641195	222.66	620.56
qrt1-2	12	0.780003	175.32	796.92
qrt1-2	12	0.774563	193.47	858.2
qrt1-2	12	0.703344	233.43	786.87
qrt1-2	12	0.628046	247.27	664.76
qrt1-2	12	0.572191	198.11	463.08
qrt1-2	12	0.276559	215.59	298.02
qrt1-2	12	0.787873	181.4	855.15
qrt1-2	12	0.717519	196.86	696.86
qrt1-2	12	0.785925	172.9	807.66
qrt1-2	12	0.782493	179.13	823.56
qrt1-2	12	0.79617	164.36	806.36
qrt1-2	12	0.781696	169.05	774.38
qrt1-2	12	0.713105	199.63	695.83
qrt1-2	12	0.569015	314.76	730.35
qrt1-2	12	0.781756	171.35	785.13
qrt1-2	12	0.494874	195.12	386.28
qrt1-2	12	0.719257	196.04	698.29
qrt1-2	12	0.575414	199.36	469.54
qrt1-2	12	0.790555	163.96	782.88
qrt1-2	12	0.786706	180.8	847.61
qrt1-2	12	0.788721	168.14	795.82
qrt1-2	12	0.659907	222.05	652.91
qrt1-2	12	0.508656	285.79	581.67
qrt1-2	12	0.752473	131.35	530.65
qrt1-2	12	0.685953	134.99	429.84
qrt1-2	12	0.808289	144.29	752.59
qrt1-2	12	0.788353	174.52	824.58
qrt1-2	12	0.795556	162.3	793.86
qrt1-2	12	0.712689	186.59	649.4
qrt1-2	12	0.547422	262.89	580.85
qrt1-2	12	0.735258	193.15	729.54
qrt1-2	12	0.696184	186.17	612.74
qrt1-2	12	0.527546	225.63	477.57
qrt1-2	12	0.533536	170.74	366.03
qrt1-2	12	0.417015	132.67	227.57
qrt1-2	12	0.254981	208.3	279.59
rsh1-1	12	0.575431	428.69	1009.73
rsh1-1	12	0.621563	309.24	817.15
rsh1-1	12	0.573832	378.19	887.42
rsh1-1	12	0.25728	342.02	460.51
rsh1-1	12	0.580062	382.02	909.73
rsh1-1	12	0.397134	387.51	642.78
rsh1-1	12	0.526454	306.28	646.78
rsh1-1	12	0.271878	445.05	611.23
rsh1-1	12	0.360086	495.13	773.76
rsh1-1	12	0.647355	271.11	768.79
rsh1-1	12	0.446465	391.1	706.55
rsh1-1	12	0.465309	390.87	731.02
rsh1-1	12	0.579213	383.88	912.29
rsh1-1	12	0.383936	419.09	680.27
rsh1-1	12	0.509733	408.51	833.24
rsh1-1	12	0.502851	408.91	822.51
rsh1-1	12	0.623937	306.95	816.22
rsh1-1	12	0.392897	452.01	744.52
rsh1-1	12	0.665612	175.47	524.75
rsh1-1	12	0.356666	434.72	675.73
rsh1-1	12	0.354487	544	842.74
rsh1-1	12	0.503633	441.92	890.33
rsh1-1	12	0.598013	358.91	892.84
rsh1-1	12	0.353783	544.04	841.9
rsh1-1	12	0.560349	385.13	875.99
rsh1-1	12	0.512661	405.12	831.29
rsh1-1	12	0.563028	368.03	842.25
rsh1-1	12	0.38521	463.97	754.68
rsh1-1	12	0.625767	315.13	842.07
rsh1-1	12	0.156693	392.87	465.88
rsh1-1	12	0.49552	452.65	897.26
rsh1-1	12	0.311473	454.49	660.09
rsh1-1	12	0.53585	411.2	885.92
rsh1-1	12	0.175416	385.32	467.29
rsh1-1	12	0.521946	416.49	871.24
rsh1-1	12	0.474687	369.31	703.01
rsh1-1	12	0.352015	531.05	819.54
rsh1-1	12	0.434788	441.38	780.91
rsh1-1	12	0.219935	351.64	450.77
rsh1-1	12	0.618965	345.22	905.98
rsh1-1	12	0.506002	431.67	873.83
rsh1-1	12	0.521558	422.01	882.05
rsh1-1	12	0.483286	460.77	891.75
rsh1-1	12	0.353291	520.4	804.69
rsh1-1	12	0.515272	429.45	885.96
rsh1-1	12	0.527986	418.45	886.5
rsh1-1	12	0.585138	374.21	902.01
rsh1-1	12	0.404871	481.37	808.85
rsh1-1	12	0.432305	393.64	693.4
rsh1-1	12	0.560859	378.32	861.5
rsh1-1	12	0.528388	441.25	935.62
rsh1-1	12	0.522916	405.13	849.18
rsh1-1	12	0.435263	469.8	831.91
rsh1-1	12	0.397394	497.22	825.1
rsh1-1	12	0.331893	584.64	875.07
rsh1-1	12	0.332518	540.27	809.43
rsh1-1	12	0.416851	426.9	732.06
rsh1-1	12	0.548995	337.37	748.04
rsh1-1	12	0.472148	409.93	776.6
rsh1-1	12	0.54079	382.82	833.65
rsh1-1	12	0.415836	547.28	936.86
rsh1-1	12	0.525201	448.32	944.21
rsh1-1	12	0.616543	349.36	911.08
rsh1-1	12	0.338305	625.93	945.95
rsh1-1	12	0.551068	375.59	836.63
rsh1-1	12	0.482425	475.33	918.36
rsh1-1	12	0.516868	419.32	867.9
rsh1-1	12	0.353612	454.34	702.89
rsh1-1	12	0.538122	414.42	897.25
rsh1-1	12	0.514657	426.01	877.75
rsh1-1	12	0.476462	470.31	898.33
rsh1-1	12	0.550507	403.11	896.81
rsh1-1	12	0.262951	521.16	707.09
rsh1-1	12	0.552045	377.98	843.79
rsh1-1	12	0.441239	404.94	724.71
rsh1-1	12	0.38675	464.11	756.82
rsh1-1	12	0.291972	476.68	673.25
rsh1-1	12	0.23824	452.28	593.73
rsh1-1	12	0.627919	331.84	891.85
rsh1-1	12	0.404007	527.43	884.96
rsh1-1	12	0.555551	413.79	931.04
rsh1-1	12	0.187515	342.69	421.78
rsh1-1	12	0.20572	391.85	493.34
rsh1-1	12	0.211668	515.37	653.76
rsh1-1	12	0.384376	486.94	790.97
rsh1-1	12	0.221995	411.59	529.02
rsh1-1	12	0.197679	493.54	615.14
rsh1-1	12	0.202167	468.36	587.04
rsh1-1	12	0.518026	405.21	840.73
rsh1-1	12	0.605204	369.64	936.28
rsh1-1	12	0.567814	316.01	731.19
rsh1-1	12	0.69703	82.81	273.36
rsh1-1	12	0.572318	385.29	900.88
rsh1-1	12	0.154295	346.68	409.93
rsh1-1	12	0.454991	406.07	745.07
rsh1-1	12	0.144264	363.2	424.43
rsh1-1	12	0.49898	407.79	813.92
rsh1-1	12	0.541966	402.09	877.86
rsh1_110	12	0.77546	135.51	603.5
rsh1_110	12	0.731508	191.68	713.95
rsh1_110	12	0.763591	158.28	669.56
rsh1_110	12	0.729297	146.16	539.89
rsh1_110	12	0.787039	114.49	537.61
rsh1_110	12	0.689486	99.2	319.47
rsh1_110	12	0.660903	152.77	450.52
rsh1_110	12	0.73298	122.57	459.03
rsh1_110	12	0.585829	119.18	287.78
rsh1_110	12	0.782332	137	629.4
rsh1_110	12	0.807831	153.17	797.06
rsh1_110	12	0.699221	169.6	563.87
rsh1_110	12	0.801533	157.69	794.49
rsh1_110	12	0.808538	154.66	807.73
rsh1_110	12	0.768917	143.75	622.07
rsh1_110	12	0.80725	160.89	834.76
rsh1_110	12	0.658313	136.62	399.84
rsh1_110	12	0.811834	139.46	741.1
rsh1_110	12	0.701732	109.16	365.98
rsh1_110	12	0.803277	164.48	836.1
rsh1_110	12	0.800937	155.46	780.96
rsh1_110	12	0.808439	143.1	747.02
rsh1_110	12	0.751911	144.12	580.96
rsh1_110	12	0.784405	145.38	674.32
rsh1_110	12	0.796461	195.64	961.24
rsh1_110	12	0.688999	208.66	670.93
rsh1_110	12	0.762289	155.09	652.39
rsh1_110	12	0.804679	150.37	769.86
rsh1_110	12	0.70145	145.39	487.02
rsh1_110	12	0.807105	151.65	786.18
rsh1_110	12	0.79919	160.19	797.72
rsh1_110	12	0.788675	171.93	813.58
rsh1_110	12	0.74371	144.74	564.75
rsh1_110	12	0.690867	118.38	382.91
rsh1_110	12	0.806406	149.9	774.3
rsh1_110	12	0.804164	156.61	799.65
rsh1_110	12	0.789259	138.75	658.39
rsh1_110	12	0.808145	148.91	776.21
rsh1_110	12	0.739851	86.83	333.77
rsh1_110	12	0.708663	79.5	272.88
rsh1_110	12	0.787509	154.97	729.35
rsh1_110	12	0.744278	120.01	469.26
rsh1_110	12	0.780865	155.06	707.6
rsh1_110	12	0.733426	163.13	611.95
rsh1_110	12	0.674583	119.08	365.9
rsh1_110	12	0.676882	151.39	468.56
rsh1_110	12	0.643869	140.85	395.5
rsh1_110	12	0.639433	102.08	283.11
rsh1_110	12	0.511043	168.47	344.55
rsh1_110	12	0.740059	147.8	568.59
rsh1_110	12	0.685497	185.45	589.66
rsh1_110	12	0.684447	124.41	394.26
rsh1_110	12	0.799416	169.76	846.33
rsh1_110	12	0.801197	162.41	816.99
rsh1_110	12	0.677929	184.84	573.91
rsh1_110	12	0.799016	156.09	776.63
rsh1_110	12	0.814035	141.72	762.08
rsh1_110	12	0.808008	136.03	708.52
rsh1_110	12	0.714276	163.57	572.44
rsh1_110	12	0.772339	155.49	682.99
rsh1_110	12	0.776677	149.43	669.12
rsh1_110	12	0.676371	175.43	542.04
rsh1_110	12	0.76024	143.3	597.68
rsh1_110	12	0.763582	142.82	604.1
rsh1_110	12	0.77892	142.33	643.84
rsh1_110	12	0.765216	161.59	688.25
rsh1_110	12	0.806941	154.09	798.15
rsh1_110	12	0.73273	131.96	493.77
rsh1_110	12	0.791566	139.04	667.07
rsh1_110	12	0.801115	152.72	767.93
rsh1_110	12	0.78825	114.11	538.89
rsh1_110	12	0.695571	141.18	463.72
rsh1_110	12	0.739081	154.19	590.95
rsh1_110	12	0.773949	135.99	601.59
rsh1_110	12	0.761687	154.52	648.35
rsh1_110	12	0.807095	146.88	761.41
rsh1_110	12	0.754519	148.42	604.61
rsh1_110	12	0.789601	155.47	738.93
rsh1_110	12	0.748239	146.93	583.61
rsh1_110	12	0.735016	90.42	341.19
rsh1_110	12	0.746265	154.56	609.14
rsh1_110	12	0.78714	149.07	700.32
rsh1_110	12	0.546027	101.64	223.89
rsh1_110	12	0.801232	147.46	741.87
rsh1_110	12	0.715643	167.06	587.5
rsh1_110	12	0.808607	128.26	670.19
rsh1_110	12	0.788906	136.38	646.11
rsh1_110	12	0.790621	150.19	717.31
rsh1_110	12	0.77251	163.82	720.12
rsh1_110	12	0.795878	139.54	683.61
rsh1_110	12	0.690491	105.09	339.57
rsh1_110	12	0.768077	127.3	548.89
rsh1_110	12	0.748368	127.21	505.54
rsh1_110	12	0.761431	159.8	669.87
rsh1_110	12	0.812452	118.96	634.29
rsh1_110	12	0.779677	151.43	687.31
rsh1_110	12	0.691084	150.3	486.54
rsh1_110	12	0.809973	143.44	754.84
rsh1_110	12	0.807316	138.8	720.35
rsh1_110	12	0.787278	109.13	512.97
rsh1_110	12	0.813133	144.22	771.78
rsh1_110	12	0.747884	130.78	518.73
rsh1_110	12	0.540204	153.64	334.17
rsh1_110	12	0.741994	92.25	357.55
