# Supplementary material for: A guanosine tetraphosphate (ppGpp) mediated brake on photosynthesis is required for acclimation to nitrogen limitation in Arabidopsis
Source: eLife journal article supplement (doi:10.7554/elife.75041), 2022-02-14
Supplement: fig2-data1 [file Fig_2_supp_1D_data.xlsx]

## Sheet: Sheet1
Line	Treatment	Fv/Fm	Fo	Fm
01_MESH_DEX0	no_N	0.806745	121.77	630.1
01_MESH_DEX0	no_N	0.794497	125.32	609.82
01_MESH_DEX0	no_N	0.806883	122.95	636.66
01_MESH_DEX0	no_N	0.355856	330.81	513.55
01_MESH_DEX0	no_N	0.772831	143.95	633.67
01_MESH_DEX0	no_N	0.76887	112.9	488.47
01_MESH_DEX0	no_N	0.345306	272.13	415.66
01_MESH_DEX0	no_N	0.727023	158.96	582.32
01_MESH_DEX0	no_N	0.782373	136.92	629.15
01_MESH_DEX0	no_N	0.539576	256.24	556.53
01_MESH_DEX0	no_N	0.754276	145.25	591.07
01_MESH_DEX0	no_N	0.667723	177.19	533.26
01_MESH_DEX0	no_N	0.572422	150.61	352.24
01_MESH_DEX0	no_N	0.480612	176.14	339.13
01_MESH_DEX0	no_N	0.773201	132.48	584.13
01_MESH_DEX0	no_N	0.725386	150.17	546.84
01_MESH_DEX0	no_N	0.74755	144.75	573.38
01_MESH_DEX0	no_N	0.404606	142.71	239.69
01_MESH_DEX0	no_N	0.771221	144.14	630.04
01_MESH_DEX0	no_N	0.371275	203.38	323.48
01_MESH_DEX0	no_N	0.789961	129.51	616.6
01_MESH_DEX0	no_N	0.583546	236.8	568.61
01_MESH_DEX0	no_N	0.758276	141.81	586.66
01_MESH_DEX0	no_N	0.368332	176.45	279.34
01_MESH_DEX0	no_N	0.700527	170.37	568.9
01_MESH_DEX0	no_N	0.745772	151.09	594.31
01_MESH_DEX0	no_N	0.607478	219.41	559
01_MESH_DEX0	no_N	0.706211	172.26	586.34
01_MESH_DEX0	no_N	0.748948	142.57	567.85
01_MESH_DEX0	no_N	0.217467	207.52	265.19
01_MESH_DEX0	no_N	0.702241	167.67	563.14
01_MESH_DEX0	no_N	0.786182	131.83	616.6
01_MESH_DEX0	no_N	0.606772	193.24	491.42
01_MESH_DEX0	no_N	0.659847	194.18	570.86
01_MESH_DEX0	no_N	0.764327	128.95	547.2
01_MESH_DEX0	no_N	0.649351	209.85	598.49
01_MESH_DEX0	no_N	0.770548	127.56	555.89
01_MESH_DEX0	no_N	0.813073	100.98	540.21
01_MESH_DEX0	no_N	0.542543	239.56	523.7
01_MESH_DEX0	no_N	0.783498	117.04	540.55
01_MESH_DEX0	no_N	0.713968	158.29	553.4
01_MESH_DEX0	no_N	0.693853	161.04	525.99
01_MESH_DEX0	no_N	0.339547	361.03	546.64
01_MESH_DEX0	no_N	0.759968	142.2	592.42
01_MESH_DEX0	no_N	0.786012	131.96	616.67
01_MESH_DEX0	no_N	0.747258	131.12	518.79
01_MESH_DEX0	no_N	0.565386	203.33	467.84
01_MESH_DEX0	no_N	0.408358	255.98	432.66
01_MESH_DEX0	no_N	0.734391	163.06	613.91
01_MESH_DEX0	no_N	0.33527	236.82	356.28
01_MESH_DEX0	no_N	0.677831	210.28	652.7
01_MESH_DEX0	no_N	0.782378	116.38	534.78
01_MESH_DEX0	no_N	0.755833	141.27	578.62
01_MESH_DEX0	no_N	0.743759	150.46	587.22
01_MESH_DEX0	no_N	0.634465	219.88	601.53
01_MESH_DEX0	no_N	0.742264	157.84	612.41
01_MESH_DEX0	no_N	0.330314	283.22	422.9
01_MESH_DEX0	no_N	0.766709	142.87	612.41
01_MESH_DEX0	no_N	0.777146	123.88	555.88
01_MESH_DEX0	no_N	0.597081	242.38	601.56
01_MESH_DEX0	no_N	0.788677	124.6	589.62
01_MESH_DEX0	no_N	0.68686	183.2	585.01
01_MESH_DEX0	no_N	0.500484	289.04	578.64
01_MESH_DEX0	no_N	0.595745	221.57	548.12
01_MESH_DEX0	no_N	0.542125	211.63	462.2
01_MESH_DEX0	no_N	0.673422	179.99	551.14
01_MESH_DEX0	no_N	0.385786	218.74	356.13
01_MESH_DEX0	no_N	0.747662	131.14	519.7
01_MESH_DEX0	no_N	0.433928	135.42	239.21
01_MESH_DEX0	no_N	0.757733	147.8	610.07
01_MESH_DEX0	no_N	0.7952	111.78	545.8
01_MESH_DEX0	no_N	0.777236	133.87	600.95
01_MESH_DEX0	no_N	0.796878	118.27	582.26
01_MESH_DEX0	no_N	0.770655	129.71	565.61
01_MESH_DEX0	no_N	0.728863	149.41	551.05
01_MESH_DEX0	no_N	0.787966	124.08	585.19
01_MESH_DEX0	no_N	0.423395	212.11	367.86
01_MESH_DEX0	no_N	0.435056	177.85	314.81
01_MESH_DEX0	no_N	0.645811	116.38	328.61
01_MESH_DEX0	no_N	0.750082	152.54	610.36
01_MESH_DEX0	no_N	0.689087	175.71	565.11
01_MESH_DEX0	no_N	0.77854	133.59	603.18
01_MESH_DEX0	no_N	0.798023	114.84	568.53
01_MESH_DEX0	no_N	0.749527	141.67	565.61
01_MESH_DEX0	no_N	0.334818	247.92	372.71
01_MESH_DEX0	no_N	0.757666	140.45	579.53
01_MESH_DEX0	no_N	0.735482	147.67	558.26
01_MESH_DEX0	no_N	0.536946	167.63	362.01
01_MESH_DEX0	no_N	0.81387	93.73	503.52
01_MESH_DEX0	no_N	0.809217	117.57	616.25
01_MESH_DEX0	no_N	0.775732	136.05	606.64
01_MESH_DEX0	no_N	0.647206	220.69	625.55
01_MESH_DEX0	no_N	0.782158	119.97	550.72
01_MESH_DEX0	no_N	0.38986	209.4	343.2
01_MESH_DEX0	no_N	0.454326	133.27	244.23
01_MESH_DEX0	no_N	0.601829	212.91	534.72
01_MESH_DEX0	no_N	0.775361	109.39	486.96
01_MESH_DEX0	no_N	0.535337	119.66	257.52
01_MESH_DEX0	no_N	0.375699	178.7	286.24
02_MESH_DEX0.1	no_N	0.805246	131.72	676.34
02_MESH_DEX0.1	no_N	0.818103	116.02	637.78
02_MESH_DEX0.1	no_N	0.821596	115.01	644.66
02_MESH_DEX0.1	no_N	0.801159	117.74	592.13
02_MESH_DEX0.1	no_N	0.800849	109.3	548.83
02_MESH_DEX0.1	no_N	0.821192	116.91	653.83
02_MESH_DEX0.1	no_N	0.79478	90.18	439.43
02_MESH_DEX0.1	no_N	0.83987	87.13	544.12
02_MESH_DEX0.1	no_N	0.770138	73.85	321.28
02_MESH_DEX0.1	no_N	0.818186	80.67	443.75
02_MESH_DEX0.1	no_N	0.724607	64.23	233.23
02_MESH_DEX0.1	no_N	0.792732	127.54	615.34
02_MESH_DEX0.1	no_N	0.795444	119.97	586.49
02_MESH_DEX0.1	no_N	0.800301	112.74	564.5
02_MESH_DEX0.1	no_N	0.794145	129.39	628.55
02_MESH_DEX0.1	no_N	0.732207	156.35	583.81
02_MESH_DEX0.1	no_N	0.800786	120.6	605.38
02_MESH_DEX0.1	no_N	0.80162	115.86	584.03
02_MESH_DEX0.1	no_N	0.77644	121.28	542.45
02_MESH_DEX0.1	no_N	0.820547	91.64	510.72
02_MESH_DEX0.1	no_N	0.731027	121.27	450.9
02_MESH_DEX0.1	no_N	0.762214	103.97	437.2
02_MESH_DEX0.1	no_N	0.780474	127.1	578.93
02_MESH_DEX0.1	no_N	0.809125	114.39	599.24
02_MESH_DEX0.1	no_N	0.788104	132.31	624.41
02_MESH_DEX0.1	no_N	0.648419	158.63	451.19
02_MESH_DEX0.1	no_N	0.723997	97.05	351.59
02_MESH_DEX0.1	no_N	0.800049	122.77	614
02_MESH_DEX0.1	no_N	0.802351	114	576.83
02_MESH_DEX0.1	no_N	0.824513	82.5	470.12
02_MESH_DEX0.1	no_N	0.640451	134.82	374.97
02_MESH_DEX0.1	no_N	0.74696	127.58	504.19
02_MESH_DEX0.1	no_N	0.779497	124.54	564.8
02_MESH_DEX0.1	no_N	0.761698	108.94	457.11
02_MESH_DEX0.1	no_N	0.679175	127.48	397.35
02_MESH_DEX0.1	no_N	0.746423	89.68	353.66
02_MESH_DEX0.1	no_N	0.807597	90.42	469.95
02_MESH_DEX0.1	no_N	0.746451	109.5	431.87
02_MESH_DEX0.1	no_N	0.792617	103.09	497.1
02_MESH_DEX0.1	no_N	0.793031	92.9	448.86
02_MESH_DEX0.1	no_N	0.79214	128.36	617.53
02_MESH_DEX0.1	no_N	0.785242	122.79	571.76
02_MESH_DEX0.1	no_N	0.804566	123.35	631.16
02_MESH_DEX0.1	no_N	0.821042	96.34	538.34
02_MESH_DEX0.1	no_N	0.773242	132.37	583.75
02_MESH_DEX0.1	no_N	0.783331	126.56	584.07
02_MESH_DEX0.1	no_N	0.773696	137.38	607.06
02_MESH_DEX0.1	no_N	0.791073	121.8	582.98
02_MESH_DEX0.1	no_N	0.768678	123.29	532.98
02_MESH_DEX0.1	no_N	0.812585	109.07	581.97
02_MESH_DEX0.1	no_N	0.745124	131.46	515.78
02_MESH_DEX0.1	no_N	0.771707	108.09	473.47
02_MESH_DEX0.1	no_N	0.770265	132.12	575.14
02_MESH_DEX0.1	no_N	0.785466	87.53	408
02_MESH_DEX0.1	no_N	0.813491	109.82	588.82
02_MESH_DEX0.1	no_N	0.774892	129.93	577.19
02_MESH_DEX0.1	no_N	0.804547	112.04	573.18
02_MESH_DEX0.1	no_N	0.80309	101.97	517.85
02_MESH_DEX0.1	no_N	0.796223	123.86	607.82
02_MESH_DEX0.1	no_N	0.737041	98.63	375.04
02_MESH_DEX0.1	no_N	0.803264	115.37	586.42
02_MESH_DEX0.1	no_N	0.787225	113.56	533.71
02_MESH_DEX0.1	no_N	0.786253	113.75	532.17
02_MESH_DEX0.1	no_N	0.757013	126.89	522.21
02_MESH_DEX0.1	no_N	0.801334	111.4	560.74
02_MESH_DEX0.1	no_N	0.774004	106.93	473.15
02_MESH_DEX0.1	no_N	0.699396	144.94	482.13
02_MESH_DEX0.1	no_N	0.798764	115.88	575.84
02_MESH_DEX0.1	no_N	0.799266	98.98	493.09
02_MESH_DEX0.1	no_N	0.80615	116.05	598.66
02_MESH_DEX0.1	no_N	0.805931	106.99	551.3
02_MESH_DEX0.1	no_N	0.810973	99.12	524.37
02_MESH_DEX0.1	no_N	0.800912	126.14	633.59
02_MESH_DEX0.1	no_N	0.816196	106.68	580.4
02_MESH_DEX0.1	no_N	0.816664	83.92	457.74
02_MESH_DEX0.1	no_N	0.704791	105.06	355.85
02_MESH_DEX0.1	no_N	0.717304	84.17	297.74
02_MESH_DEX0.1	no_N	0.833785	85.96	517.16
02_MESH_DEX0.1	no_N	0.800984	104.31	524.18
02_MESH_DEX0.1	no_N	0.678057	124.18	385.72
02_MESH_DEX0.1	no_N	0.818006	99.86	548.7
02_MESH_DEX0.1	no_N	0.791323	97.74	468.38
02_MESH_DEX0.1	no_N	0.75533	117.88	481.75
02_MESH_DEX0.1	no_N	0.754899	104.06	424.56
02_MESH_DEX0.1	no_N	0.804378	87.94	449.54
02_MESH_DEX0.1	no_N	0.771586	93.7	410.22
02_MESH_DEX0.1	no_N	0.809962	110.64	582.2
02_MESH_DEX0.1	no_N	0.823386	102.36	579.57
02_MESH_DEX0.1	no_N	0.802224	104.42	527.92
02_MESH_DEX0.1	no_N	0.753109	116.92	473.57
02_MESH_DEX0.1	no_N	0.831334	89.27	529.33
02_MESH_DEX0.1	no_N	0.816478	97.83	533.07
02_MESH_DEX0.1	no_N	0.77276	91.23	401.47
02_MESH_DEX0.1	no_N	0.764503	90.93	386.12
02_MESH_DEX0.1	no_N	0.846201	42.64	277.31
02_MESH_DEX0.1	no_N	0.759892	105.03	437.47
03_MESH_DEX10	no_N	0.804274	117.97	602.78
03_MESH_DEX10	no_N	0.773125	99.7	439.45
03_MESH_DEX10	no_N	0.825968	100.31	576.33
03_MESH_DEX10	no_N	0.809323	110.43	579.2
03_MESH_DEX10	no_N	0.797884	126.87	627.71
03_MESH_DEX10	no_N	0.827993	85.42	496.55
03_MESH_DEX10	no_N	0.792848	117.25	566.01
03_MESH_DEX10	no_N	0.812699	104.19	556.27
03_MESH_DEX10	no_N	0.817358	108.24	592.58
03_MESH_DEX10	no_N	0.825973	94.65	543.88
03_MESH_DEX10	no_N	0.788855	122.2	578.75
03_MESH_DEX10	no_N	0.790643	117.77	562.58
03_MESH_DEX10	no_N	0.801937	119.25	602.08
03_MESH_DEX10	no_N	0.802273	112.55	569.22
03_MESH_DEX10	no_N	0.74919	116.17	463.18
03_MESH_DEX10	no_N	0.726512	151.98	555.71
03_MESH_DEX10	no_N	0.792383	116.61	561.61
03_MESH_DEX10	no_N	0.74901	141.32	563.09
03_MESH_DEX10	no_N	0.813731	99.08	531.92
03_MESH_DEX10	no_N	0.81659	84.75	462.08
03_MESH_DEX10	no_N	0.737615	151.74	578.31
03_MESH_DEX10	no_N	0.772878	132.98	585.5
03_MESH_DEX10	no_N	0.819649	95.24	528.08
03_MESH_DEX10	no_N	0.749329	148.41	592.05
03_MESH_DEX10	no_N	0.810739	104.58	552.57
03_MESH_DEX10	no_N	0.808003	119.05	620.01
03_MESH_DEX10	no_N	0.772268	125.89	552.8
03_MESH_DEX10	no_N	0.798135	112.6	557.75
03_MESH_DEX10	no_N	0.784147	97.98	453.92
03_MESH_DEX10	no_N	0.757394	137.24	565.69
03_MESH_DEX10	no_N	0.754593	128.11	522.03
03_MESH_DEX10	no_N	0.780453	124.46	566.85
03_MESH_DEX10	no_N	0.77938	131.92	597.95
03_MESH_DEX10	no_N	0.775857	115.68	516.1
03_MESH_DEX10	no_N	0.77475	120.04	532.92
03_MESH_DEX10	no_N	0.759008	126.41	524.54
03_MESH_DEX10	no_N	0.752555	152.76	617.31
03_MESH_DEX10	no_N	0.702271	169.74	570.15
03_MESH_DEX10	no_N	0.76816	136.73	589.76
03_MESH_DEX10	no_N	0.76885	130.59	565
03_MESH_DEX10	no_N	0.723763	172.22	623.45
03_MESH_DEX10	no_N	0.786925	115.44	541.78
03_MESH_DEX10	no_N	0.803175	122.26	621.16
03_MESH_DEX10	no_N	0.762622	126.28	532.02
03_MESH_DEX10	no_N	0.650402	160.49	459.07
03_MESH_DEX10	no_N	0.784019	121.85	564.17
03_MESH_DEX10	no_N	0.800963	104.17	523.37
03_MESH_DEX10	no_N	0.778525	121.84	550.13
03_MESH_DEX10	no_N	0.743838	149.34	582.99
03_MESH_DEX10	no_N	0.787648	116.94	550.69
03_MESH_DEX10	no_N	0.751196	136.75	549.63
03_MESH_DEX10	no_N	0.790138	110.06	524.44
03_MESH_DEX10	no_N	0.793707	122.02	591.49
03_MESH_DEX10	no_N	0.773509	133.75	590.53
03_MESH_DEX10	no_N	0.811007	111.98	592.51
03_MESH_DEX10	no_N	0.775961	123.56	551.51
03_MESH_DEX10	no_N	0.805814	129	664.31
03_MESH_DEX10	no_N	0.780413	127.33	579.86
03_MESH_DEX10	no_N	0.783232	122.27	564.06
03_MESH_DEX10	no_N	0.814852	110.51	596.82
03_MESH_DEX10	no_N	0.708913	172.37	592.16
03_MESH_DEX10	no_N	0.743363	147.42	574.43
03_MESH_DEX10	no_N	0.811754	113.2	601.34
03_MESH_DEX10	no_N	0.775212	138.01	614
03_MESH_DEX10	no_N	0.803692	115.16	586.68
03_MESH_DEX10	no_N	0.635148	150.29	411.92
03_MESH_DEX10	no_N	0.761336	139.15	583.08
03_MESH_DEX10	no_N	0.76024	120.64	503.17
03_MESH_DEX10	no_N	0.727465	158.31	580.88
03_MESH_DEX10	no_N	0.81417	98.23	528.6
03_MESH_DEX10	no_N	0.800233	103.09	516.05
03_MESH_DEX10	no_N	0.768858	137.37	594.31
03_MESH_DEX10	no_N	0.760628	113.8	475.41
03_MESH_DEX10	no_N	0.774303	133.87	593.14
03_MESH_DEX10	no_N	0.745218	131.2	514.95
03_MESH_DEX10	no_N	0.778157	135.36	610.16
03_MESH_DEX10	no_N	0.794407	109.34	531.78
03_MESH_DEX10	no_N	0.804906	107.22	549.58
03_MESH_DEX10	no_N	0.759954	141.02	587.43
03_MESH_DEX10	no_N	0.72655	148.56	543.28
03_MESH_DEX10	no_N	0.795959	108.16	530.09
03_MESH_DEX10	no_N	0.77185	131.45	576.2
03_MESH_DEX10	no_N	0.787745	138.45	652.28
03_MESH_DEX10	no_N	0.766181	134.18	573.82
03_MESH_DEX10	no_N	0.819588	113.29	627.95
03_MESH_DEX10	no_N	0.832155	87.59	521.79
03_MESH_DEX10	no_N	0.805261	112.6	578.26
03_MESH_DEX10	no_N	0.808887	89.24	466.95
03_MESH_DEX10	no_N	0.80017	114.9	574.99
03_MESH_DEX10	no_N	0.735977	136.27	516.13
03_MESH_DEX10	no_N	0.823888	113.58	644.93
03_MESH_DEX10	no_N	0.814126	109.77	590.56
03_MESH_DEX10	no_N	0.827794	81.66	474.2
03_MESH_DEX10	no_N	0.685129	135.81	431.32
03_MESH_DEX10	no_N	0.763715	129.2	546.84
03_MESH_DEX10	no_N	0.773897	136.34	603
