# Supplementary material for: A guanosine tetraphosphate (ppGpp) mediated brake on photosynthesis is required for acclimation to nitrogen limitation in Arabidopsis
Source: eLife journal article supplement (doi:10.7554/elife.75041), 2022-02-14
Supplement: fig2-data1 [file Fig_2_supp_1E_data.xlsx]

## Sheet: data
Line	Treatment	Fv/Fm	Fo	Fm
01_COL	No N	0.733432	254.83	955.93
01_COL	No N	0.748741	253.39	1008.48
01_COL	No N	0.750888	244.74	982.45
01_COL	No N	0.740445	265.78	1024.02
01_COL	No N	0.726895	248.58	910.2
01_COL	No N	0.740362	264.88	1020.23
02_rsh1	No N	0.635098	418.77	1147.65
02_rsh1	No N	0.577555	436.58	1033.46
02_rsh1	No N	0.593532	456.22	1122.4
02_rsh1	No N	0.650584	391.86	1121.47
02_rsh1	No N	0.668842	339.02	1023.71
02_rsh1	No N	0.600847	426.25	1067.86
03_QM	No N	0.819011	183.02	1011.22
03_QM	No N	0.821348	168.29	942
03_QM	No N	0.824771	137.53	784.86
03_QM	No N	0.820562	188.67	1051.45
03_QM	No N	0.799049	175.84	875.04
03_QM	No N	0.818382	179.31	987.29
03_QM	No N	0.810833	194.07	1025.92
01_COL	N	0.829832	122.8	721.64
01_COL	N	0.806342	138.21	713.68
01_COL	N	0.811352	137.17	727.12
01_COL	N	0.817075	128.58	702.91
01_COL	N	0.801788	138.35	697.99
01_COL	N	0.795348	138.67	677.59
01_COL	N	0.826226	120.38	692.68
02_rsh1	N	0.79818	149.7	741.7
02_rsh1	N	0.806868	144.97	750.68
02_rsh1	N	0.768867	183.98	795.95
02_rsh1	N	0.808751	144.32	754.62
02_rsh1	N	0.806529	147.44	762.08
02_rsh1	N	0.817931	140.34	770.86
02_rsh1	N	0.794214	154	748.35
03_QM	N	0.807597	138.29	718.7
03_QM	N	0.823997	128.47	729.93
03_QM	N	0.813476	124.68	668.44
03_QM	N	0.818051	132.79	729.82
03_QM	N	0.811712	123.24	654.53
03_QM	N	0.823132	125.75	711.04
03_QM	N	0.814128	131.23	705.97
