# Supplementary material for: A guanosine tetraphosphate (ppGpp) mediated brake on photosynthesis is required for acclimation to nitrogen limitation in Arabidopsis
Source: eLife journal article supplement (doi:10.7554/elife.75041), 2022-02-14
Supplement: fig2-data1 [file Fig_2_supp_2A_data.xlsx]

## Sheet: -N
Light	Line	QY	ETR
27	01_COL	0.38	10.26
27	01_COL	0.31	8.37
27	01_COL	0.48	12.96
27	01_COL	0.41	11.07
27	01_COL	0.5	13.5
27	01_COL	0.28	7.56
27	01_COL	0.53	14.31
27	01_COL	0.16	4.32
27	01_COL	0.18	4.86
27	01_COL	0.28	7.56
27	01_COL	0.21	5.67
27	01_COL	0.33	8.91
27	01_COL	0.23	6.21
27	01_COL	0.12	3.24
27	01_COL	0.4	10.8
27	01_COL	0.31	8.37
27	01_COL	0.43	11.61
27	01_COL	0.5	13.5
27	01_COL	0.21	5.67
27	01_COL	0.54	14.58
27	01_COL	0.5	13.5
27	01_COL	0.25	6.75
27	01_COL	0.31	8.37
27	01_COL	0.45	12.15
27	01_COL	0.3	8.1
27	01_COL	0.4	10.8
27	01_COL	0.51	13.77
27	01_COL	0.53	14.31
27	01_COL	0.25	6.75
27	01_COL	0.31	8.37
27	01_COL	0.36	9.72
27	01_COL	0.52	14.04
27	01_COL	0.34	9.18
27	01_COL	0.21	5.67
27	01_COL	0.34	9.18
27	01_COL	0.41	11.07
27	01_COL	0.36	9.72
27	01_COL	0.3	8.1
27	01_COL	0.45	12.15
27	01_COL	0.48	12.96
27	01_COL	0.32	8.64
27	01_COL	0.36	9.72
27	01_COL	0.36	9.72
27	01_COL	0.42	11.34
27	01_COL	0.36	9.72
27	01_COL	0.28	7.56
27	01_COL	0.36	9.72
27	01_COL	0.3	8.1
27	01_COL	0.32	8.64
27	01_COL	0.13	3.51
27	01_COL	0.45	12.15
27	01_COL	0.5	13.5
27	01_COL	0.23	6.21
27	01_COL	0.45	12.15
27	01_COL	0.43	11.61
27	01_COL	0.54	14.58
27	01_COL	0.69	18.63
27	01_COL	0.53	14.31
27	01_COL	0.35	9.45
27	01_COL	0.45	12.15
27	01_COL	0.52	14.04
27	01_COL	0.49	13.23
27	01_COL	0.67	18.09
27	01_COL	0.58	15.66
27	01_COL	0.53	14.31
27	01_COL	0.49	13.23
27	01_COL	0.46	12.42
27	01_COL	0.63	17.01
65	01_COL	0.38	24.7
65	01_COL	0.27	17.55
65	01_COL	0.47	30.55
65	01_COL	0.35	22.75
65	01_COL	0.49	31.85
65	01_COL	0.26	16.9
65	01_COL	0.5	32.5
65	01_COL	0.14	9.1
65	01_COL	0.16	10.4
65	01_COL	0.24	15.6
65	01_COL	0.18	11.7
65	01_COL	0.32	20.8
65	01_COL	0.15	9.75
65	01_COL	0.07	4.55
65	01_COL	0.36	23.4
65	01_COL	0.29	18.85
65	01_COL	0.4	26
65	01_COL	0.44	28.6
65	01_COL	0.2	13
65	01_COL	0.51	33.15
65	01_COL	0.5	32.5
65	01_COL	0.24	15.6
65	01_COL	0.31	20.15
65	01_COL	0.43	27.95
65	01_COL	0.29	18.85
65	01_COL	0.36	23.4
65	01_COL	0.45	29.25
65	01_COL	0.5	32.5
65	01_COL	0.19	12.35
65	01_COL	0.25	16.25
65	01_COL	0.34	22.1
65	01_COL	0.44	28.6
65	01_COL	0.27	17.55
65	01_COL	0.18	11.7
65	01_COL	0.3	19.5
65	01_COL	0.36	23.4
65	01_COL	0.31	20.15
65	01_COL	0.23	14.95
65	01_COL	0.39	25.35
65	01_COL	0.44	28.6
65	01_COL	0.28	18.2
65	01_COL	0.32	20.8
65	01_COL	0.32	20.8
65	01_COL	0.38	24.7
65	01_COL	0.28	18.2
65	01_COL	0.21	13.65
65	01_COL	0.34	22.1
65	01_COL	0.26	16.9
65	01_COL	0.24	15.6
65	01_COL	0.11	7.15
65	01_COL	0.45	29.25
65	01_COL	0.48	31.2
65	01_COL	0.18	11.7
65	01_COL	0.39	25.35
65	01_COL	0.37	24.05
65	01_COL	0.52	33.8
65	01_COL	0.63	40.95
65	01_COL	0.47	30.55
65	01_COL	0.3	19.5
65	01_COL	0.45	29.25
65	01_COL	0.46	29.9
65	01_COL	0.49	31.85
65	01_COL	0.66	42.9
65	01_COL	0.57	37.05
65	01_COL	0.49	31.85
65	01_COL	0.46	29.9
65	01_COL	0.49	31.85
65	01_COL	0.6	39
124	01_COL	0.37	45.88
124	01_COL	0.18	22.32
124	01_COL	0.39	48.36
124	01_COL	0.25	31
124	01_COL	0.4	49.6
124	01_COL	0.2	24.8
124	01_COL	0.46	57.04
124	01_COL	0.1	12.4
124	01_COL	0.11	13.64
124	01_COL	0.16	19.84
124	01_COL	0.13	16.12
124	01_COL	0.25	31
124	01_COL	0.08	9.92
124	01_COL	0.03	3.72
124	01_COL	0.26	32.24
124	01_COL	0.2	24.8
124	01_COL	0.32	39.68
124	01_COL	0.36	44.64
124	01_COL	0.17	21.08
124	01_COL	0.42	52.08
124	01_COL	0.41	50.84
124	01_COL	0.16	19.84
124	01_COL	0.29	35.96
124	01_COL	0.37	45.88
124	01_COL	0.22	27.28
124	01_COL	0.26	32.24
124	01_COL	0.33	40.92
124	01_COL	0.42	52.08
124	01_COL	0.12	14.88
124	01_COL	0.16	19.84
124	01_COL	0.25	31
124	01_COL	0.34	42.16
124	01_COL	0.15	18.6
124	01_COL	0.11	13.64
124	01_COL	0.19	23.56
124	01_COL	0.28	34.72
124	01_COL	0.25	31
124	01_COL	0.16	19.84
124	01_COL	0.32	39.68
124	01_COL	0.31	38.44
124	01_COL	0.18	22.32
124	01_COL	0.26	32.24
124	01_COL	0.23	28.52
124	01_COL	0.27	33.48
124	01_COL	0.17	21.08
124	01_COL	0.11	13.64
124	01_COL	0.27	33.48
124	01_COL	0.15	18.6
124	01_COL	0.15	18.6
124	01_COL	0.06	7.44
124	01_COL	0.39	48.36
124	01_COL	0.42	52.08
124	01_COL	0.12	14.88
124	01_COL	0.26	32.24
124	01_COL	0.25	31
124	01_COL	0.45	55.8
124	01_COL	0.49	60.76
124	01_COL	0.36	44.64
124	01_COL	0.18	22.32
124	01_COL	0.41	50.84
124	01_COL	0.36	44.64
124	01_COL	0.45	55.8
124	01_COL	0.6	74.4
124	01_COL	0.53	65.72
124	01_COL	0.39	48.36
124	01_COL	0.36	44.64
124	01_COL	0.37	45.88
124	01_COL	0.54	66.96
217	01_COL	0.29	62.93
217	01_COL	0.11	23.87
217	01_COL	0.3	65.1
217	01_COL	0.17	36.89
217	01_COL	0.27	58.59
217	01_COL	0.12	26.04
217	01_COL	0.39	84.63
217	01_COL	0.02	4.34
217	01_COL	0.07	15.19
217	01_COL	0.1	21.7
217	01_COL	0.09	19.53
217	01_COL	0.17	36.89
217	01_COL	0.04	8.68
217	01_COL	0.02	4.34
217	01_COL	0.17	36.89
217	01_COL	0.12	26.04
217	01_COL	0.2	43.4
217	01_COL	0.29	62.93
217	01_COL	0.1	21.7
217	01_COL	0.31	67.27
217	01_COL	0.29	62.93
217	01_COL	0.11	23.87
217	01_COL	0.22	47.74
217	01_COL	0.29	62.93
217	01_COL	0.15	32.55
217	01_COL	0.17	36.89
217	01_COL	0.22	47.74
217	01_COL	0.29	62.93
217	01_COL	0.07	15.19
217	01_COL	0.1	21.7
217	01_COL	0.16	34.72
217	01_COL	0.24	52.08
217	01_COL	0.12	26.04
217	01_COL	0.06	13.02
217	01_COL	0.16	34.72
217	01_COL	0.17	36.89
217	01_COL	0.15	32.55
217	01_COL	0.09	19.53
217	01_COL	0.22	47.74
217	01_COL	0.21	45.57
217	01_COL	0.11	23.87
217	01_COL	0.16	34.72
217	01_COL	0.14	30.38
217	01_COL	0.19	41.23
217	01_COL	0.1	21.7
217	01_COL	0.07	15.19
217	01_COL	0.2	43.4
217	01_COL	0.1	21.7
217	01_COL	0.09	19.53
217	01_COL	0.05	10.85
217	01_COL	0.28	60.76
217	01_COL	0.32	69.44
217	01_COL	0.07	15.19
217	01_COL	0.14	30.38
217	01_COL	0.16	34.72
217	01_COL	0.36	78.12
217	01_COL	0.33	71.61
217	01_COL	0.24	52.08
217	01_COL	0.11	23.87
217	01_COL	0.32	69.44
217	01_COL	0.25	54.25
217	01_COL	0.39	84.63
217	01_COL	0.47	101.99
217	01_COL	0.44	95.48
217	01_COL	0.27	58.59
217	01_COL	0.24	52.08
217	01_COL	0.31	67.27
217	01_COL	0.41	88.97
325	01_COL	0.21	68.25
325	01_COL	0.07	22.75
325	01_COL	0.2	65
325	01_COL	0.12	39
325	01_COL	0.19	61.75
325	01_COL	0.1	32.5
325	01_COL	0.3	97.5
325	01_COL	0.06	19.5
325	01_COL	0.03	9.75
325	01_COL	0.05	16.25
325	01_COL	0.07	22.75
325	01_COL	0.13	42.25
325	01_COL	-0.01	-3.25
325	01_COL	-0.06	-19.5
325	01_COL	0.14	45.5
325	01_COL	0.08	26
325	01_COL	0.14	45.5
325	01_COL	0.21	68.25
325	01_COL	0.07	22.75
325	01_COL	0.23	74.75
325	01_COL	0.19	61.75
325	01_COL	0.06	19.5
325	01_COL	0.15	48.75
325	01_COL	0.23	74.75
325	01_COL	0.1	32.5
325	01_COL	0.12	39
325	01_COL	0.18	58.5
325	01_COL	0.22	71.5
325	01_COL	0.03	9.75
325	01_COL	0.07	22.75
325	01_COL	0.12	39
325	01_COL	0.16	52
325	01_COL	0.07	22.75
325	01_COL	0.02	6.5
325	01_COL	0.09	29.25
325	01_COL	0.13	42.25
325	01_COL	0.12	39
325	01_COL	0.06	19.5
325	01_COL	0.16	52
325	01_COL	0.13	42.25
325	01_COL	0.07	22.75
325	01_COL	0.12	39
325	01_COL	0.11	35.75
325	01_COL	0.14	45.5
325	01_COL	0.05	16.25
325	01_COL	0.05	16.25
325	01_COL	0.13	42.25
325	01_COL	0.06	19.5
325	01_COL	0.03	9.75
325	01_COL	-0.01	-3.25
325	01_COL	0.17	55.25
325	01_COL	0.23	74.75
325	01_COL	0.05	16.25
325	01_COL	0.1	32.5
325	01_COL	0.11	35.75
325	01_COL	0.25	81.25
325	01_COL	0.24	78
325	01_COL	0.16	52
325	01_COL	0.07	22.75
325	01_COL	0.24	78
325	01_COL	0.17	55.25
325	01_COL	0.3	97.5
325	01_COL	0.36	117
325	01_COL	0.35	113.75
325	01_COL	0.2	65
325	01_COL	0.17	55.25
325	01_COL	0.24	78
325	01_COL	0.41	133.25
480	01_COL	0.14	67.2
480	01_COL	0.03	14.4
480	01_COL	0.15	72
480	01_COL	0.07	33.6
480	01_COL	0.12	57.6
480	01_COL	0.05	24
480	01_COL	0.22	105.6
480	01_COL	-0.01	-4.8
480	01_COL	0.04	19.2
480	01_COL	0.03	14.4
480	01_COL	0.06	28.8
480	01_COL	0.08	38.4
480	01_COL	0	0
480	01_COL	-0.05	-24
480	01_COL	0.09	43.2
480	01_COL	0.05	24
480	01_COL	0.12	57.6
480	01_COL	0.16	76.8
480	01_COL	0.03	14.4
480	01_COL	0.15	72
480	01_COL	0.13	62.4
480	01_COL	0.06	28.8
480	01_COL	0.08	38.4
480	01_COL	0.16	76.8
480	01_COL	0.05	24
480	01_COL	0.07	33.6
480	01_COL	0.1	48
480	01_COL	0.13	62.4
480	01_COL	0	0
480	01_COL	0.05	24
480	01_COL	0.07	33.6
480	01_COL	0.11	52.8
480	01_COL	0.05	24
480	01_COL	0.02	9.6
480	01_COL	0.11	52.8
480	01_COL	0.09	43.2
480	01_COL	0.09	43.2
480	01_COL	0.03	14.4
480	01_COL	0.09	43.2
480	01_COL	0.12	57.6
480	01_COL	0.06	28.8
480	01_COL	0.09	43.2
480	01_COL	0.08	38.4
480	01_COL	0.1	48
480	01_COL	0.06	28.8
480	01_COL	0.03	14.4
480	01_COL	0.08	38.4
480	01_COL	0.04	19.2
480	01_COL	0.04	19.2
480	01_COL	-0.02	-9.6
480	01_COL	0.12	57.6
480	01_COL	0.15	72
480	01_COL	0.04	19.2
480	01_COL	0.07	33.6
480	01_COL	0.09	43.2
480	01_COL	0.18	86.4
480	01_COL	0.19	91.2
480	01_COL	0.11	52.8
480	01_COL	0.07	33.6
480	01_COL	0.17	81.6
480	01_COL	0.1	48
480	01_COL	0.21	100.8
480	01_COL	0.25	120
480	01_COL	0.23	110.4
480	01_COL	0.13	62.4
480	01_COL	0.14	67.2
480	01_COL	0.18	86.4
480	01_COL	0.11	52.8
665	01_COL	0.09	59.85
665	01_COL	0.04	26.6
665	01_COL	0.08	53.2
665	01_COL	0.06	39.9
665	01_COL	0.13	86.45
665	01_COL	0.06	39.9
665	01_COL	0.14	93.1
665	01_COL	0.04	26.6
665	01_COL	0.03	19.95
665	01_COL	0.01	6.65
665	01_COL	0.01	6.65
665	01_COL	0.05	33.25
665	01_COL	0	0
665	01_COL	-0.04	-26.6
665	01_COL	0.07	46.55
665	01_COL	0.05	33.25
665	01_COL	0.07	46.55
665	01_COL	0.12	79.8
665	01_COL	0.03	19.95
665	01_COL	0.1	66.5
665	01_COL	0.09	59.85
665	01_COL	0.03	19.95
665	01_COL	0.05	33.25
665	01_COL	0.13	86.45
665	01_COL	0.04	26.6
665	01_COL	0.05	33.25
665	01_COL	0.07	46.55
665	01_COL	0.09	59.85
665	01_COL	-0.03	-19.95
665	01_COL	0.02	13.3
665	01_COL	0.06	39.9
665	01_COL	0.05	33.25
665	01_COL	0.04	26.6
665	01_COL	0	0
665	01_COL	-0.03	-19.95
665	01_COL	0.08	53.2
665	01_COL	0.05	33.25
665	01_COL	0.05	33.25
665	01_COL	0.07	46.55
665	01_COL	0.08	53.2
665	01_COL	0.02	13.3
665	01_COL	0.06	39.9
665	01_COL	0.06	39.9
665	01_COL	0.06	39.9
665	01_COL	0.02	13.3
665	01_COL	0.03	19.95
665	01_COL	0.06	39.9
665	01_COL	0.04	26.6
665	01_COL	0.03	19.95
665	01_COL	0.01	6.65
665	01_COL	0.1	66.5
665	01_COL	0.11	73.15
665	01_COL	0.01	6.65
665	01_COL	0.05	33.25
665	01_COL	0.07	46.55
665	01_COL	0.11	73.15
665	01_COL	0.11	73.15
665	01_COL	0.05	33.25
665	01_COL	0.05	33.25
665	01_COL	0.11	73.15
665	01_COL	0.11	73.15
665	01_COL	0.14	93.1
665	01_COL	0.19	126.35
665	01_COL	0.17	113.05
665	01_COL	0.09	59.85
665	01_COL	0.1	66.5
665	01_COL	0.23	152.95
665	01_COL	0.11	73.15
866	01_COL	0.06	51.96
866	01_COL	0.03	25.98
866	01_COL	0.05	43.3
866	01_COL	0.04	34.64
866	01_COL	0.06	51.96
866	01_COL	0.03	25.98
866	01_COL	0.09	77.94
866	01_COL	0.02	17.32
866	01_COL	0.01	8.66
866	01_COL	0.04	34.64
866	01_COL	0.02	17.32
866	01_COL	0.07	60.62
866	01_COL	0.01	8.66
866	01_COL	0.03	25.98
866	01_COL	0.06	51.96
866	01_COL	0.03	25.98
866	01_COL	0.04	34.64
866	01_COL	0.05	43.3
866	01_COL	0.05	43.3
866	01_COL	0.07	60.62
866	01_COL	0.07	60.62
866	01_COL	0.03	25.98
866	01_COL	0.04	34.64
866	01_COL	0.11	95.26
866	01_COL	0.04	34.64
866	01_COL	0.04	34.64
866	01_COL	0.09	77.94
866	01_COL	0.09	77.94
866	01_COL	0	0
866	01_COL	0.02	17.32
866	01_COL	0.05	43.3
866	01_COL	0.1	86.6
866	01_COL	0.05	43.3
866	01_COL	0.01	8.66
866	01_COL	0	0
866	01_COL	0.05	43.3
866	01_COL	0.04	34.64
866	01_COL	0.04	34.64
866	01_COL	0.05	43.3
866	01_COL	0.04	34.64
866	01_COL	0.04	34.64
866	01_COL	0.04	34.64
866	01_COL	0.06	51.96
866	01_COL	0.06	51.96
866	01_COL	0.02	17.32
866	01_COL	0.04	34.64
866	01_COL	0.04	34.64
866	01_COL	0.02	17.32
866	01_COL	0.03	25.98
866	01_COL	-0.01	-8.66
866	01_COL	0.07	60.62
866	01_COL	0.07	60.62
866	01_COL	0.01	8.66
866	01_COL	0.09	77.94
866	01_COL	0.06	51.96
866	01_COL	0.09	77.94
866	01_COL	0.1	86.6
866	01_COL	0.07	60.62
866	01_COL	0.02	17.32
866	01_COL	0.1	86.6
866	01_COL	0.07	60.62
866	01_COL	0.1	86.6
866	01_COL	0.14	121.24
866	01_COL	0.13	112.58
866	01_COL	0.08	69.28
866	01_COL	0.07	60.62
866	01_COL	0.16	138.56
866	01_COL	0.13	112.58
1098	01_COL	0.06	65.88
1098	01_COL	0	0
1098	01_COL	0.05	54.9
1098	01_COL	0.05	54.9
1098	01_COL	0.05	54.9
1098	01_COL	0.01	10.98
1098	01_COL	0.1	109.8
1098	01_COL	0.06	65.88
1098	01_COL	0	0
1098	01_COL	0.04	43.92
1098	01_COL	0.04	43.92
1098	01_COL	0.03	32.94
1098	01_COL	-0.01	-10.98
1098	01_COL	-0.02	-21.96
1098	01_COL	0.04	43.92
1098	01_COL	0.03	32.94
1098	01_COL	0.04	43.92
1098	01_COL	0.09	98.82
1098	01_COL	0.01	10.98
1098	01_COL	0.06	65.88
1098	01_COL	0.05	54.9
1098	01_COL	0.01	10.98
1098	01_COL	0.01	10.98
1098	01_COL	0.07	76.86
1098	01_COL	0.03	32.94
1098	01_COL	0.04	43.92
1098	01_COL	0.07	76.86
1098	01_COL	0.06	65.88
1098	01_COL	0.02	21.96
1098	01_COL	0.04	43.92
1098	01_COL	0.05	54.9
1098	01_COL	0.05	54.9
1098	01_COL	-0.01	-10.98
1098	01_COL	0.01	10.98
1098	01_COL	0.05	54.9
1098	01_COL	0.01	10.98
1098	01_COL	0.02	21.96
1098	01_COL	0.03	32.94
1098	01_COL	0.04	43.92
1098	01_COL	0.05	54.9
1098	01_COL	0.01	10.98
1098	01_COL	0.03	32.94
1098	01_COL	0.01	10.98
1098	01_COL	0.05	54.9
1098	01_COL	0.01	10.98
1098	01_COL	0.03	32.94
1098	01_COL	0.03	32.94
1098	01_COL	0.01	10.98
1098	01_COL	0.01	10.98
1098	01_COL	0.01	10.98
1098	01_COL	0.06	65.88
1098	01_COL	0.07	76.86
1098	01_COL	0.01	10.98
1098	01_COL	0.06	65.88
1098	01_COL	0.04	43.92
1098	01_COL	0.07	76.86
1098	01_COL	0.09	98.82
1098	01_COL	0.05	54.9
1098	01_COL	0.03	32.94
1098	01_COL	0.06	65.88
1098	01_COL	0.07	76.86
1098	01_COL	0.09	98.82
1098	01_COL	0.1	109.8
1098	01_COL	0.08	87.84
1098	01_COL	0.06	65.88
1098	01_COL	0.07	76.86
1098	01_COL	0.1	109.8
1098	01_COL	0.12	131.76
27	02_OXRSH1	0.59	15.93
27	02_OXRSH1	0.59	15.93
27	02_OXRSH1	0.55	14.85
27	02_OXRSH1	0.62	16.74
27	02_OXRSH1	0.48	12.96
27	02_OXRSH1	0.64	17.28
27	02_OXRSH1	0.58	15.66
27	02_OXRSH1	0.53	14.31
27	02_OXRSH1	0.74	19.98
27	02_OXRSH1	0.61	16.47
27	02_OXRSH1	0.58	15.66
27	02_OXRSH1	0.51	13.77
27	02_OXRSH1	0.59	15.93
27	02_OXRSH1	0.3	8.1
27	02_OXRSH1	0.34	9.18
27	02_OXRSH1	0.51	13.77
27	02_OXRSH1	0.55	14.85
27	02_OXRSH1	0.36	9.72
27	02_OXRSH1	0.41	11.07
27	02_OXRSH1	0.38	10.26
27	02_OXRSH1	0.33	8.91
27	02_OXRSH1	0.53	14.31
27	02_OXRSH1	0.49	13.23
27	02_OXRSH1	0.56	15.12
27	02_OXRSH1	0.6	16.2
27	02_OXRSH1	0.48	12.96
27	02_OXRSH1	0.61	16.47
27	02_OXRSH1	0.64	17.28
27	02_OXRSH1	0.56	15.12
27	02_OXRSH1	0.22	5.94
27	02_OXRSH1	0.65	17.55
27	02_OXRSH1	0.57	15.39
27	02_OXRSH1	0.39	10.53
27	02_OXRSH1	0.6	16.2
27	02_OXRSH1	0.36	9.72
27	02_OXRSH1	0.52	14.04
27	02_OXRSH1	0.58	15.66
27	02_OXRSH1	0.48	12.96
27	02_OXRSH1	0.34	9.18
27	02_OXRSH1	0.29	7.83
27	02_OXRSH1	0.43	11.61
27	02_OXRSH1	0.63	17.01
27	02_OXRSH1	0.61	16.47
27	02_OXRSH1	0.53	14.31
27	02_OXRSH1	0.58	15.66
27	02_OXRSH1	0.5	13.5
27	02_OXRSH1	0.39	10.53
27	02_OXRSH1	0.41	11.07
27	02_OXRSH1	0.55	14.85
27	02_OXRSH1	0.56	15.12
27	02_OXRSH1	0.55	14.85
27	02_OXRSH1	0.51	13.77
27	02_OXRSH1	0.38	10.26
27	02_OXRSH1	0.36	9.72
27	02_OXRSH1	0.24	6.48
27	02_OXRSH1	0.42	11.34
27	02_OXRSH1	0.43	11.61
27	02_OXRSH1	0.55	14.85
27	02_OXRSH1	0.62	16.74
27	02_OXRSH1	0.65	17.55
27	02_OXRSH1	0.28	7.56
27	02_OXRSH1	0.58	15.66
27	02_OXRSH1	0.57	15.39
27	02_OXRSH1	0.51	13.77
27	02_OXRSH1	0.45	12.15
27	02_OXRSH1	0.57	15.39
27	02_OXRSH1	0.55	14.85
27	02_OXRSH1	0.62	16.74
27	02_OXRSH1	0.54	14.58
65	02_OXRSH1	0.54	35.1
65	02_OXRSH1	0.59	38.35
65	02_OXRSH1	0.48	31.2
65	02_OXRSH1	0.6	39
65	02_OXRSH1	0.42	27.3
65	02_OXRSH1	0.6	39
65	02_OXRSH1	0.57	37.05
65	02_OXRSH1	0.51	33.15
65	02_OXRSH1	0.72	46.8
65	02_OXRSH1	0.57	37.05
65	02_OXRSH1	0.56	36.4
65	02_OXRSH1	0.49	31.85
65	02_OXRSH1	0.56	36.4
65	02_OXRSH1	0.25	16.25
65	02_OXRSH1	0.27	17.55
65	02_OXRSH1	0.48	31.2
65	02_OXRSH1	0.48	31.2
65	02_OXRSH1	0.34	22.1
65	02_OXRSH1	0.36	23.4
65	02_OXRSH1	0.31	20.15
65	02_OXRSH1	0.3	19.5
65	02_OXRSH1	0.5	32.5
65	02_OXRSH1	0.45	29.25
65	02_OXRSH1	0.52	33.8
65	02_OXRSH1	0.58	37.7
65	02_OXRSH1	0.43	27.95
65	02_OXRSH1	0.56	36.4
65	02_OXRSH1	0.58	37.7
65	02_OXRSH1	0.52	33.8
65	02_OXRSH1	0.2	13
65	02_OXRSH1	0.58	37.7
65	02_OXRSH1	0.56	36.4
65	02_OXRSH1	0.37	24.05
65	02_OXRSH1	0.56	36.4
65	02_OXRSH1	0.29	18.85
65	02_OXRSH1	0.49	31.85
65	02_OXRSH1	0.53	34.45
65	02_OXRSH1	0.45	29.25
65	02_OXRSH1	0.3	19.5
65	02_OXRSH1	0.25	16.25
65	02_OXRSH1	0.42	27.3
65	02_OXRSH1	0.55	35.75
65	02_OXRSH1	0.56	36.4
65	02_OXRSH1	0.51	33.15
65	02_OXRSH1	0.53	34.45
65	02_OXRSH1	0.47	30.55
65	02_OXRSH1	0.32	20.8
65	02_OXRSH1	0.39	25.35
65	02_OXRSH1	0.49	31.85
65	02_OXRSH1	0.5	32.5
65	02_OXRSH1	0.51	33.15
65	02_OXRSH1	0.48	31.2
65	02_OXRSH1	0.35	22.75
65	02_OXRSH1	0.31	20.15
65	02_OXRSH1	0.19	12.35
65	02_OXRSH1	0.37	24.05
65	02_OXRSH1	0.41	26.65
65	02_OXRSH1	0.52	33.8
65	02_OXRSH1	0.58	37.7
65	02_OXRSH1	0.58	37.7
65	02_OXRSH1	0.25	16.25
65	02_OXRSH1	0.54	35.1
65	02_OXRSH1	0.51	33.15
65	02_OXRSH1	0.44	28.6
65	02_OXRSH1	0.44	28.6
65	02_OXRSH1	0.52	33.8
65	02_OXRSH1	0.51	33.15
65	02_OXRSH1	0.57	37.05
65	02_OXRSH1	0.5	32.5
124	02_OXRSH1	0.47	58.28
124	02_OXRSH1	0.57	70.68
124	02_OXRSH1	0.39	48.36
124	02_OXRSH1	0.59	73.16
124	02_OXRSH1	0.31	38.44
124	02_OXRSH1	0.48	59.52
124	02_OXRSH1	0.53	65.72
124	02_OXRSH1	0.38	47.12
124	02_OXRSH1	0.65	80.6
124	02_OXRSH1	0.45	55.8
124	02_OXRSH1	0.52	64.48
124	02_OXRSH1	0.41	50.84
124	02_OXRSH1	0.5	62
124	02_OXRSH1	0.16	19.84
124	02_OXRSH1	0.15	18.6
124	02_OXRSH1	0.39	48.36
124	02_OXRSH1	0.35	43.4
124	02_OXRSH1	0.27	33.48
124	02_OXRSH1	0.26	32.24
124	02_OXRSH1	0.24	29.76
124	02_OXRSH1	0.22	27.28
124	02_OXRSH1	0.41	50.84
124	02_OXRSH1	0.35	43.4
124	02_OXRSH1	0.4	49.6
124	02_OXRSH1	0.53	65.72
124	02_OXRSH1	0.34	42.16
124	02_OXRSH1	0.5	62
124	02_OXRSH1	0.46	57.04
124	02_OXRSH1	0.46	57.04
124	02_OXRSH1	0.13	16.12
124	02_OXRSH1	0.46	57.04
124	02_OXRSH1	0.53	65.72
124	02_OXRSH1	0.33	40.92
124	02_OXRSH1	0.47	58.28
124	02_OXRSH1	0.18	22.32
124	02_OXRSH1	0.41	50.84
124	02_OXRSH1	0.45	55.8
124	02_OXRSH1	0.36	44.64
124	02_OXRSH1	0.21	26.04
124	02_OXRSH1	0.15	18.6
124	02_OXRSH1	0.37	45.88
124	02_OXRSH1	0.42	52.08
124	02_OXRSH1	0.49	60.76
124	02_OXRSH1	0.46	57.04
124	02_OXRSH1	0.44	54.56
124	02_OXRSH1	0.43	53.32
124	02_OXRSH1	0.23	28.52
124	02_OXRSH1	0.31	38.44
124	02_OXRSH1	0.43	53.32
124	02_OXRSH1	0.41	50.84
124	02_OXRSH1	0.49	60.76
124	02_OXRSH1	0.38	47.12
124	02_OXRSH1	0.29	35.96
124	02_OXRSH1	0.21	26.04
124	02_OXRSH1	0.12	14.88
124	02_OXRSH1	0.28	34.72
124	02_OXRSH1	0.38	47.12
124	02_OXRSH1	0.44	54.56
124	02_OXRSH1	0.47	58.28
124	02_OXRSH1	0.48	59.52
124	02_OXRSH1	0.2	24.8
124	02_OXRSH1	0.47	58.28
124	02_OXRSH1	0.42	52.08
124	02_OXRSH1	0.36	44.64
124	02_OXRSH1	0.41	50.84
124	02_OXRSH1	0.46	57.04
124	02_OXRSH1	0.48	59.52
124	02_OXRSH1	0.46	57.04
124	02_OXRSH1	0.43	53.32
217	02_OXRSH1	0.36	78.12
217	02_OXRSH1	0.48	104.16
217	02_OXRSH1	0.26	56.42
217	02_OXRSH1	0.51	110.67
217	02_OXRSH1	0.2	43.4
217	02_OXRSH1	0.32	69.44
217	02_OXRSH1	0.43	93.31
217	02_OXRSH1	0.27	58.59
217	02_OXRSH1	0.55	119.35
217	02_OXRSH1	0.34	73.78
217	02_OXRSH1	0.42	91.14
217	02_OXRSH1	0.3	65.1
217	02_OXRSH1	0.4	86.8
217	02_OXRSH1	0.1	21.7
217	02_OXRSH1	0.07	15.19
217	02_OXRSH1	0.3	65.1
217	02_OXRSH1	0.23	49.91
217	02_OXRSH1	0.18	39.06
217	02_OXRSH1	0.17	36.89
217	02_OXRSH1	0.16	34.72
217	02_OXRSH1	0.14	30.38
217	02_OXRSH1	0.29	62.93
217	02_OXRSH1	0.27	58.59
217	02_OXRSH1	0.29	62.93
217	02_OXRSH1	0.43	93.31
217	02_OXRSH1	0.23	49.91
217	02_OXRSH1	0.4	86.8
217	02_OXRSH1	0.32	69.44
217	02_OXRSH1	0.35	75.95
217	02_OXRSH1	0.08	17.36
217	02_OXRSH1	0.27	58.59
217	02_OXRSH1	0.42	91.14
217	02_OXRSH1	0.24	52.08
217	02_OXRSH1	0.35	75.95
217	02_OXRSH1	0.1	21.7
217	02_OXRSH1	0.29	62.93
217	02_OXRSH1	0.33	71.61
217	02_OXRSH1	0.25	54.25
217	02_OXRSH1	0.13	28.21
217	02_OXRSH1	0.1	21.7
217	02_OXRSH1	0.26	56.42
217	02_OXRSH1	0.31	67.27
217	02_OXRSH1	0.38	82.46
217	02_OXRSH1	0.38	82.46
217	02_OXRSH1	0.35	75.95
217	02_OXRSH1	0.33	71.61
217	02_OXRSH1	0.15	32.55
217	02_OXRSH1	0.23	49.91
217	02_OXRSH1	0.34	73.78
217	02_OXRSH1	0.22	47.74
217	02_OXRSH1	0.39	84.63
217	02_OXRSH1	0.28	60.76
217	02_OXRSH1	0.26	56.42
217	02_OXRSH1	0.15	32.55
217	02_OXRSH1	0.06	13.02
217	02_OXRSH1	0.19	41.23
217	02_OXRSH1	0.31	67.27
217	02_OXRSH1	0.33	71.61
217	02_OXRSH1	0.33	71.61
217	02_OXRSH1	0.35	75.95
217	02_OXRSH1	0.13	28.21
217	02_OXRSH1	0.36	78.12
217	02_OXRSH1	0.33	71.61
217	02_OXRSH1	0.29	62.93
217	02_OXRSH1	0.33	71.61
217	02_OXRSH1	0.35	75.95
217	02_OXRSH1	0.37	80.29
217	02_OXRSH1	0.34	73.78
217	02_OXRSH1	0.33	71.61
325	02_OXRSH1	0.28	91
325	02_OXRSH1	0.38	123.5
325	02_OXRSH1	0.19	61.75
325	02_OXRSH1	0.41	133.25
325	02_OXRSH1	0.13	42.25
325	02_OXRSH1	0.21	68.25
325	02_OXRSH1	0.33	107.25
325	02_OXRSH1	0.18	58.5
325	02_OXRSH1	0.46	149.5
325	02_OXRSH1	0.23	74.75
325	02_OXRSH1	0.33	107.25
325	02_OXRSH1	0.22	71.5
325	02_OXRSH1	0.31	100.75
325	02_OXRSH1	0.06	19.5
325	02_OXRSH1	0.05	16.25
325	02_OXRSH1	0.24	78
325	02_OXRSH1	0.17	55.25
325	02_OXRSH1	0.13	42.25
325	02_OXRSH1	0.12	39
325	02_OXRSH1	0.13	42.25
325	02_OXRSH1	0.1	32.5
325	02_OXRSH1	0.22	71.5
325	02_OXRSH1	0.2	65
325	02_OXRSH1	0.23	74.75
325	02_OXRSH1	0.32	104
325	02_OXRSH1	0.17	55.25
325	02_OXRSH1	0.29	94.25
325	02_OXRSH1	0.21	68.25
325	02_OXRSH1	0.27	87.75
325	02_OXRSH1	0.07	22.75
325	02_OXRSH1	0.23	74.75
325	02_OXRSH1	0.3	97.5
325	02_OXRSH1	0.16	52
325	02_OXRSH1	0.29	94.25
325	02_OXRSH1	0.08	26
325	02_OXRSH1	0.19	61.75
325	02_OXRSH1	0.24	78
325	02_OXRSH1	0.19	61.75
325	02_OXRSH1	0.09	29.25
325	02_OXRSH1	0.08	26
325	02_OXRSH1	0.21	68.25
325	02_OXRSH1	0.21	68.25
325	02_OXRSH1	0.26	84.5
325	02_OXRSH1	0.28	91
325	02_OXRSH1	0.24	78
325	02_OXRSH1	0.24	78
325	02_OXRSH1	0.1	32.5
325	02_OXRSH1	0.17	55.25
325	02_OXRSH1	0.27	87.75
325	02_OXRSH1	0.2	65
325	02_OXRSH1	0.28	91
325	02_OXRSH1	0.19	61.75
325	02_OXRSH1	0.23	74.75
325	02_OXRSH1	0.1	32.5
325	02_OXRSH1	0.03	9.75
325	02_OXRSH1	0.14	45.5
325	02_OXRSH1	0.22	71.5
325	02_OXRSH1	0.21	68.25
325	02_OXRSH1	0.24	78
325	02_OXRSH1	0.22	71.5
325	02_OXRSH1	0.09	29.25
325	02_OXRSH1	0.25	81.25
325	02_OXRSH1	0.24	78
325	02_OXRSH1	0.22	71.5
325	02_OXRSH1	0.27	87.75
325	02_OXRSH1	0.26	84.5
325	02_OXRSH1	0.3	97.5
325	02_OXRSH1	0.28	91
325	02_OXRSH1	0.23	74.75
480	02_OXRSH1	0.2	96
480	02_OXRSH1	0.26	124.8
480	02_OXRSH1	0.15	72
480	02_OXRSH1	0.27	129.6
480	02_OXRSH1	0.09	43.2
480	02_OXRSH1	0.16	76.8
480	02_OXRSH1	0.25	120
480	02_OXRSH1	0.13	62.4
480	02_OXRSH1	0.41	196.8
480	02_OXRSH1	0.19	91.2
480	02_OXRSH1	0.26	124.8
480	02_OXRSH1	0.14	67.2
480	02_OXRSH1	0.25	120
480	02_OXRSH1	0.05	24
480	02_OXRSH1	0.02	9.6
480	02_OXRSH1	0.19	91.2
480	02_OXRSH1	0.12	57.6
480	02_OXRSH1	0.08	38.4
480	02_OXRSH1	0.09	43.2
480	02_OXRSH1	0.09	43.2
480	02_OXRSH1	0.07	33.6
480	02_OXRSH1	0.15	72
480	02_OXRSH1	0.15	72
480	02_OXRSH1	0.17	81.6
480	02_OXRSH1	0.22	105.6
480	02_OXRSH1	0.13	62.4
480	02_OXRSH1	0.22	105.6
480	02_OXRSH1	0.15	72
480	02_OXRSH1	0.18	86.4
480	02_OXRSH1	0.03	14.4
480	02_OXRSH1	0.18	86.4
480	02_OXRSH1	0.21	100.8
480	02_OXRSH1	0.11	52.8
480	02_OXRSH1	0.19	91.2
480	02_OXRSH1	0.04	19.2
480	02_OXRSH1	0.12	57.6
480	02_OXRSH1	0.16	76.8
480	02_OXRSH1	0.14	67.2
480	02_OXRSH1	0.07	33.6
480	02_OXRSH1	0.06	28.8
480	02_OXRSH1	0.14	67.2
480	02_OXRSH1	0.14	67.2
480	02_OXRSH1	0.16	76.8
480	02_OXRSH1	0.19	91.2
480	02_OXRSH1	0.18	86.4
480	02_OXRSH1	0.16	76.8
480	02_OXRSH1	0.07	33.6
480	02_OXRSH1	0.13	62.4
480	02_OXRSH1	0.21	100.8
480	02_OXRSH1	0.18	86.4
480	02_OXRSH1	0.22	105.6
480	02_OXRSH1	0.15	72
480	02_OXRSH1	0.15	72
480	02_OXRSH1	0.06	28.8
480	02_OXRSH1	0.02	9.6
480	02_OXRSH1	0.12	57.6
480	02_OXRSH1	0.14	67.2
480	02_OXRSH1	0.14	67.2
480	02_OXRSH1	0.19	91.2
480	02_OXRSH1	0.22	105.6
480	02_OXRSH1	0.08	38.4
480	02_OXRSH1	0.19	91.2
480	02_OXRSH1	0.19	91.2
480	02_OXRSH1	0.18	86.4
480	02_OXRSH1	0.29	139.2
480	02_OXRSH1	0.19	91.2
480	02_OXRSH1	0.24	115.2
480	02_OXRSH1	0.18	86.4
480	02_OXRSH1	0.19	91.2
665	02_OXRSH1	0.14	93.1
665	02_OXRSH1	0.19	126.35
665	02_OXRSH1	0.11	73.15
665	02_OXRSH1	0.18	119.7
665	02_OXRSH1	0.07	46.55
665	02_OXRSH1	0.13	86.45
665	02_OXRSH1	0.18	119.7
665	02_OXRSH1	0.1	66.5
665	02_OXRSH1	0.3	199.5
665	02_OXRSH1	0.15	99.75
665	02_OXRSH1	0.2	133
665	02_OXRSH1	0.1	66.5
665	02_OXRSH1	0.19	126.35
665	02_OXRSH1	0.03	19.95
665	02_OXRSH1	0.02	13.3
665	02_OXRSH1	0.15	99.75
665	02_OXRSH1	0.08	53.2
665	02_OXRSH1	0.06	39.9
665	02_OXRSH1	0.06	39.9
665	02_OXRSH1	0.05	33.25
665	02_OXRSH1	0.05	33.25
665	02_OXRSH1	0.12	79.8
665	02_OXRSH1	0.12	79.8
665	02_OXRSH1	0.11	73.15
665	02_OXRSH1	0.15	99.75
665	02_OXRSH1	0.1	66.5
665	02_OXRSH1	0.16	106.4
665	02_OXRSH1	0.11	73.15
665	02_OXRSH1	0.14	93.1
665	02_OXRSH1	0.02	13.3
665	02_OXRSH1	0.04	26.6
665	02_OXRSH1	0.15	99.75
665	02_OXRSH1	0.08	53.2
665	02_OXRSH1	0.13	86.45
665	02_OXRSH1	0.06	39.9
665	02_OXRSH1	0.09	59.85
665	02_OXRSH1	0.1	66.5
665	02_OXRSH1	0.11	73.15
665	02_OXRSH1	0.05	33.25
665	02_OXRSH1	0.03	19.95
665	02_OXRSH1	0.1	66.5
665	02_OXRSH1	0.11	73.15
665	02_OXRSH1	0.14	93.1
665	02_OXRSH1	0.12	79.8
665	02_OXRSH1	0.14	93.1
665	02_OXRSH1	0.11	73.15
665	02_OXRSH1	0.04	26.6
665	02_OXRSH1	0.11	73.15
665	02_OXRSH1	0.16	106.4
665	02_OXRSH1	0.08	53.2
665	02_OXRSH1	0.13	86.45
665	02_OXRSH1	0.11	73.15
665	02_OXRSH1	0.14	93.1
665	02_OXRSH1	0.06	39.9
665	02_OXRSH1	0.06	39.9
665	02_OXRSH1	0.08	53.2
665	02_OXRSH1	0.12	79.8
665	02_OXRSH1	0.1	66.5
665	02_OXRSH1	0.15	99.75
665	02_OXRSH1	0.11	73.15
665	02_OXRSH1	0.06	39.9
665	02_OXRSH1	0.14	93.1
665	02_OXRSH1	0.12	79.8
665	02_OXRSH1	0.1	66.5
665	02_OXRSH1	0.15	99.75
665	02_OXRSH1	0.16	106.4
665	02_OXRSH1	0.19	126.35
665	02_OXRSH1	0.13	86.45
665	02_OXRSH1	0.15	99.75
866	02_OXRSH1	0.12	103.92
866	02_OXRSH1	0.15	129.9
866	02_OXRSH1	0.09	77.94
866	02_OXRSH1	0.12	103.92
866	02_OXRSH1	0.08	69.28
866	02_OXRSH1	0.08	69.28
866	02_OXRSH1	0.15	129.9
866	02_OXRSH1	0.08	69.28
866	02_OXRSH1	0.29	251.14
866	02_OXRSH1	0.09	77.94
866	02_OXRSH1	0.17	147.22
866	02_OXRSH1	0.09	77.94
866	02_OXRSH1	0.15	129.9
866	02_OXRSH1	0.02	17.32
866	02_OXRSH1	0.02	17.32
866	02_OXRSH1	0.13	112.58
866	02_OXRSH1	0.07	60.62
866	02_OXRSH1	0.07	60.62
866	02_OXRSH1	0.05	43.3
866	02_OXRSH1	0.06	51.96
866	02_OXRSH1	0.05	43.3
866	02_OXRSH1	0.08	69.28
866	02_OXRSH1	0.09	77.94
866	02_OXRSH1	0.09	77.94
866	02_OXRSH1	0.12	103.92
866	02_OXRSH1	0.06	51.96
866	02_OXRSH1	0.14	121.24
866	02_OXRSH1	0.08	69.28
866	02_OXRSH1	0.12	103.92
866	02_OXRSH1	0.02	17.32
866	02_OXRSH1	0.13	112.58
866	02_OXRSH1	0.11	95.26
866	02_OXRSH1	0.08	69.28
866	02_OXRSH1	0.13	112.58
866	02_OXRSH1	0.03	25.98
866	02_OXRSH1	0.07	60.62
866	02_OXRSH1	0.11	95.26
866	02_OXRSH1	0.07	60.62
866	02_OXRSH1	0.04	34.64
866	02_OXRSH1	0.03	25.98
866	02_OXRSH1	0.09	77.94
866	02_OXRSH1	0.07	60.62
866	02_OXRSH1	0.09	77.94
866	02_OXRSH1	0.12	103.92
866	02_OXRSH1	0.09	77.94
866	02_OXRSH1	0.1	86.6
866	02_OXRSH1	0.08	69.28
866	02_OXRSH1	0.08	69.28
866	02_OXRSH1	0.11	95.26
866	02_OXRSH1	0.01	8.66
866	02_OXRSH1	0.11	95.26
866	02_OXRSH1	0.07	60.62
866	02_OXRSH1	0.1	86.6
866	02_OXRSH1	0.02	17.32
866	02_OXRSH1	0.03	25.98
866	02_OXRSH1	0.07	60.62
866	02_OXRSH1	0.09	77.94
866	02_OXRSH1	0.08	69.28
866	02_OXRSH1	0.09	77.94
866	02_OXRSH1	0.08	69.28
866	02_OXRSH1	0.04	34.64
866	02_OXRSH1	0.1	86.6
866	02_OXRSH1	0.1	86.6
866	02_OXRSH1	0.09	77.94
866	02_OXRSH1	0.16	138.56
866	02_OXRSH1	0.1	86.6
866	02_OXRSH1	0.18	155.88
866	02_OXRSH1	0.11	95.26
866	02_OXRSH1	0.1	86.6
1098	02_OXRSH1	0.07	76.86
1098	02_OXRSH1	0.12	131.76
1098	02_OXRSH1	0.08	87.84
1098	02_OXRSH1	0.09	98.82
1098	02_OXRSH1	0.06	65.88
1098	02_OXRSH1	0.06	65.88
1098	02_OXRSH1	0.11	120.78
1098	02_OXRSH1	0.05	54.9
1098	02_OXRSH1	0.2	219.6
1098	02_OXRSH1	0.08	87.84
1098	02_OXRSH1	0.12	131.76
1098	02_OXRSH1	0.05	54.9
1098	02_OXRSH1	0.12	131.76
1098	02_OXRSH1	0.01	10.98
1098	02_OXRSH1	0.05	54.9
1098	02_OXRSH1	0.11	120.78
1098	02_OXRSH1	0.05	54.9
1098	02_OXRSH1	0.06	65.88
1098	02_OXRSH1	0.04	43.92
1098	02_OXRSH1	0.04	43.92
1098	02_OXRSH1	0.04	43.92
1098	02_OXRSH1	0.07	76.86
1098	02_OXRSH1	0.06	65.88
1098	02_OXRSH1	0.07	76.86
1098	02_OXRSH1	0.08	87.84
1098	02_OXRSH1	0.08	87.84
1098	02_OXRSH1	0.12	131.76
1098	02_OXRSH1	0.05	54.9
1098	02_OXRSH1	0.07	76.86
1098	02_OXRSH1	0	0
1098	02_OXRSH1	0.04	43.92
1098	02_OXRSH1	0.08	87.84
1098	02_OXRSH1	0.04	43.92
1098	02_OXRSH1	0.09	98.82
1098	02_OXRSH1	0.02	21.96
1098	02_OXRSH1	0.04	43.92
1098	02_OXRSH1	0.06	65.88
1098	02_OXRSH1	0.05	54.9
1098	02_OXRSH1	0.03	32.94
1098	02_OXRSH1	0.04	43.92
1098	02_OXRSH1	0.07	76.86
1098	02_OXRSH1	0.1	109.8
1098	02_OXRSH1	0.1	109.8
1098	02_OXRSH1	0.06	65.88
1098	02_OXRSH1	0.08	87.84
1098	02_OXRSH1	0.05	54.9
1098	02_OXRSH1	0.06	65.88
1098	02_OXRSH1	0.07	76.86
1098	02_OXRSH1	0.1	109.8
1098	02_OXRSH1	0.12	131.76
1098	02_OXRSH1	0.05	54.9
1098	02_OXRSH1	0.06	65.88
1098	02_OXRSH1	0.08	87.84
1098	02_OXRSH1	0.03	32.94
1098	02_OXRSH1	0.04	43.92
1098	02_OXRSH1	0.07	76.86
1098	02_OXRSH1	0.05	54.9
1098	02_OXRSH1	0.08	87.84
1098	02_OXRSH1	0.11	120.78
1098	02_OXRSH1	0.1	109.8
1098	02_OXRSH1	0.05	54.9
1098	02_OXRSH1	0.09	98.82
1098	02_OXRSH1	0.07	76.86
1098	02_OXRSH1	0.06	65.88
1098	02_OXRSH1	0.11	120.78
1098	02_OXRSH1	0.09	98.82
1098	02_OXRSH1	0.14	153.72
1098	02_OXRSH1	0.1	109.8
1098	02_OXRSH1	0.07	76.86

## Sheet: +N
Light	Line	QY	ETR
27	01_col	0.710587	19.1858
27	01_col	0.732973	19.7903
27	01_col	0.710901	19.1943
27	01_col	0.676926	18.277
27	01_col	0.715408	19.316
27	01_col	0.736967	19.8981
27	01_col	0.690139	18.6338
27	01_col	0.740618	19.9967
27	01_col	0.699345	18.8823
27	01_col	0.745367	20.1249
27	01_col	0.682049	18.4153
27	01_col	0.743349	20.0704
27	01_col	0.709665	19.161
27	01_col	0.683083	18.4432
27	01_col	0.722432	19.5057
27	01_col	0.738882	19.9498
27	01_col	0.70658	19.0777
27	01_col	0.756164	20.4164
27	01_col	0.710111	19.173
27	01_col	0.749772	20.2438
27	01_col	0.741176	20.0118
27	01_col	0.736629	19.889
27	01_col	0.651734	17.5968
27	01_col	0.7065	19.0755
27	01_col	0.682365	18.4239
27	01_col	0.733123	19.7943
27	01_col	0.675666	18.243
27	01_col	0.744719	20.1074
27	01_col	0.736282	19.8796
27	01_col	0.749301	20.2311
27	01_col	0.725071	19.5769
27	01_col	0.758538	20.4805
27	01_col	0.753499	20.3445
27	01_col	0.713632	19.2681
27	01_col	0.758599	20.4822
27	01_col	0.678053	18.3074
27	01_col	0.719528	19.4273
27	01_col	0.69551	18.7788
27	01_col	0.694486	18.7511
27	01_col	0.723604	19.5373
27	01_col	0.751174	20.2817
27	01_col	0.727598	19.6452
27	01_col	0.667328	18.0178
27	01_col	0.745575	20.1305
27	01_col	0.683959	18.4669
27	01_col	0.760198	20.5254
27	01_col	0.715912	19.3296
27	01_col	0.726732	19.6218
27	01_col	0.693669	18.7291
27	01_col	0.759637	20.5102
27	01_col	0.742446	20.046
27	01_col	0.673628	18.188
27	01_col	0.709563	19.1582
27	01_col	0.722201	19.4994
27	01_col	0.726294	19.6099
27	01_col	0.734848	19.8409
27	01_col	0.750362	20.2598
27	01_col	0.724164	19.5524
27	01_col	0.757534	20.4534
27	01_col	0.752109	20.307
27	01_col	0.709849	19.1659
27	01_col	0.709392	19.1536
27	01_col	0.738537	19.9405
27	01_col	0.650368	17.5599
27	01_col	0.72215	19.4981
27	01_col	0.697513	18.8329
27	01_col	0.719086	19.4153
27	01_col	0.728716	19.6753
27	01_col	0.701378	18.9372
27	01_col	0.731547	19.7518
27	01_col	0.688892	18.6001
27	01_col	0.750556	20.265
27	01_col	0.674224	18.204
27	01_col	0.708515	19.1299
27	01_col	0.711941	19.2224
27	01_col	0.759497	20.5064
27	01_col	0.683304	18.4492
27	01_col	0.704298	19.016
27	01_col	0.676551	18.2669
27	01_col	0.702033	18.9549
27	01_col	0.750605	20.2663
27	01_col	0.69543	18.7766
27	01_col	0.742904	20.0584
27	01_col	0.73475	19.8383
27	01_col	0.727208	19.6346
27	01_col	0.696918	18.8168
27	01_col	0.702308	18.9623
27	01_col	0.71696	19.3579
27	01_col	0.729034	19.6839
27	01_col	0.700593	18.916
27	01_col	0.727292	19.6369
27	01_col	0.661034	17.8479
27	01_col	0.713628	19.268
27	01_col	0.750497	20.2634
27	01_col	0.66282	17.8961
27	01_col	0.729821	19.7052
27	01_col	0.704229	19.0142
27	01_col	0.748862	20.2193
27	01_col	0.724454	19.5603
27	01_col	0.754397	20.3687
27	01_col	0.725493	19.5883
27	01_col	0.753345	20.3403
27	01_col	0.762898	20.5982
27	01_col	0.731475	19.7498
27	01_col	0.788905	21.3004
27	01_col	0.744795	20.1095
27	01_col	0.755313	20.3935
27	01_col	0.767759	20.7295
27	01_col	0.769684	20.7815
27	01_col	0.73302	19.7915
27	01_col	0.738491	19.9393
27	01_col	0.76809	20.7384
27	01_col	0.727741	19.649
65	01_col	0.676728	43.9873
65	01_col	0.712315	46.3005
65	01_col	0.684531	44.4945
65	01_col	0.620546	40.3355
65	01_col	0.699636	45.4763
65	01_col	0.726757	47.2392
65	01_col	0.661545	43.0005
65	01_col	0.71348	46.3762
65	01_col	0.677847	44.06
65	01_col	0.730154	47.46
65	01_col	0.661904	43.0238
65	01_col	0.729314	47.4054
65	01_col	0.689835	44.8393
65	01_col	0.650023	42.2515
65	01_col	0.702168	45.6409
65	01_col	0.724172	47.0712
65	01_col	0.690788	44.9012
65	01_col	0.734496	47.7423
65	01_col	0.685301	44.5446
65	01_col	0.73515	47.7847
65	01_col	0.721236	46.8804
65	01_col	0.710836	46.2043
65	01_col	0.646847	42.045
65	01_col	0.679992	44.1995
65	01_col	0.642709	41.7761
65	01_col	0.713668	46.3884
65	01_col	0.656828	42.6938
65	01_col	0.726985	47.254
65	01_col	0.714472	46.4407
65	01_col	0.732143	47.5893
65	01_col	0.705123	45.833
65	01_col	0.737341	47.9272
65	01_col	0.731163	47.5256
65	01_col	0.677073	44.0098
65	01_col	0.737791	47.9564
65	01_col	0.617163	40.1156
65	01_col	0.687655	44.6976
65	01_col	0.670903	43.6087
65	01_col	0.634731	41.2575
65	01_col	0.702096	45.6363
65	01_col	0.734212	47.7238
65	01_col	0.707271	45.9726
65	01_col	0.610071	39.6546
65	01_col	0.720705	46.8458
65	01_col	0.661613	43.0048
65	01_col	0.736697	47.8853
65	01_col	0.689927	44.8453
65	01_col	0.705805	45.8773
65	01_col	0.657966	42.7678
65	01_col	0.742701	48.2755
65	01_col	0.718908	46.729
65	01_col	0.626142	40.6992
65	01_col	0.674304	43.8298
65	01_col	0.710218	46.1642
65	01_col	0.708245	46.0359
65	01_col	0.718688	46.7147
65	01_col	0.734805	47.7623
65	01_col	0.699152	45.4449
65	01_col	0.742426	48.2577
65	01_col	0.733413	47.6719
65	01_col	0.686166	44.6008
65	01_col	0.699704	45.4807
65	01_col	0.721191	46.8774
65	01_col	0.651002	42.3151
65	01_col	0.703728	45.7423
65	01_col	0.668329	43.4414
65	01_col	0.66729	43.3738
65	01_col	0.708592	46.0585
65	01_col	0.690248	44.8661
65	01_col	0.710305	46.1698
65	01_col	0.67076	43.5994
65	01_col	0.736424	47.8675
65	01_col	0.646093	41.996
65	01_col	0.689958	44.8472
65	01_col	0.690265	44.8672
65	01_col	0.744095	48.3662
65	01_col	0.668954	43.482
65	01_col	0.677151	44.0148
65	01_col	0.673794	43.7966
65	01_col	0.686301	44.6096
65	01_col	0.733355	47.668
65	01_col	0.680124	44.2081
65	01_col	0.724715	47.1065
65	01_col	0.718406	46.6964
65	01_col	0.696596	45.2787
65	01_col	0.658763	42.8196
65	01_col	0.687933	44.7157
65	01_col	0.697853	45.3604
65	01_col	0.708832	46.0741
65	01_col	0.671675	43.6589
65	01_col	0.712507	46.313
65	01_col	0.654501	42.5426
65	01_col	0.676617	43.9801
65	01_col	0.729544	47.4203
65	01_col	0.652154	42.39
65	01_col	0.690404	44.8763
65	01_col	0.688707	44.766
65	01_col	0.738834	48.0242
65	01_col	0.708884	46.0774
65	01_col	0.733069	47.6495
65	01_col	0.712027	46.2818
65	01_col	0.739789	48.0863
65	01_col	0.742157	48.2402
65	01_col	0.715472	46.5057
65	01_col	0.761886	49.5226
65	01_col	0.719472	46.7657
65	01_col	0.722149	46.9397
65	01_col	0.752938	48.9409
65	01_col	0.749155	48.6951
65	01_col	0.710961	46.2125
65	01_col	0.697308	45.325
65	01_col	0.744554	48.396
65	01_col	0.703336	45.7168
124	01_col	0.583165	72.3125
124	01_col	0.665208	82.4858
124	01_col	0.615527	76.3253
124	01_col	0.505162	62.6401
124	01_col	0.615344	76.3026
124	01_col	0.67894	84.1886
124	01_col	0.591716	73.3728
124	01_col	0.666213	82.6104
124	01_col	0.620761	76.9743
124	01_col	0.684631	84.8943
124	01_col	0.607015	75.2699
124	01_col	0.681476	84.5031
124	01_col	0.630722	78.2095
124	01_col	0.575344	71.3426
124	01_col	0.653729	81.0624
124	01_col	0.672069	83.3365
124	01_col	0.642574	79.6792
124	01_col	0.693436	85.986
124	01_col	0.627559	77.8173
124	01_col	0.690585	85.6326
124	01_col	0.665966	82.5797
124	01_col	0.67187	83.3119
124	01_col	0.586419	72.716
124	01_col	0.590389	73.2082
124	01_col	0.560319	69.4795
124	01_col	0.648967	80.4719
124	01_col	0.601548	74.592
124	01_col	0.680005	84.3206
124	01_col	0.66605	82.5902
124	01_col	0.685348	84.9831
124	01_col	0.660209	81.866
124	01_col	0.696442	86.3588
124	01_col	0.683551	84.7603
124	01_col	0.63068	78.2043
124	01_col	0.695581	86.2521
124	01_col	0.511591	63.4373
124	01_col	0.604156	74.9153
124	01_col	0.606303	75.1815
124	01_col	0.530889	65.8303
124	01_col	0.653515	81.0359
124	01_col	0.68883	85.4149
124	01_col	0.666935	82.6999
124	01_col	0.501665	62.2065
124	01_col	0.666667	82.6667
124	01_col	0.602883	74.7575
124	01_col	0.790799	98.0591
124	01_col	0.627572	77.8189
124	01_col	0.6523	80.8852
124	01_col	0.593342	73.5744
124	01_col	0.697522	86.4927
124	01_col	0.667416	82.7596
124	01_col	0.555353	68.8637
124	01_col	0.622035	77.1323
124	01_col	0.661981	82.0857
124	01_col	0.668866	82.9393
124	01_col	0.667446	82.7633
124	01_col	0.687006	85.1888
124	01_col	0.639914	79.3493
124	01_col	0.696446	86.3594
124	01_col	0.682445	84.6231
124	01_col	0.626505	77.6866
124	01_col	0.647573	80.299
124	01_col	0.668076	82.8414
124	01_col	0.575938	71.4163
124	01_col	0.641433	79.5377
124	01_col	0.565662	70.1421
124	01_col	0.57149	70.8647
124	01_col	0.645975	80.1009
124	01_col	0.617113	76.522
124	01_col	0.657152	81.4869
124	01_col	0.614834	76.2394
124	01_col	0.692088	85.8189
124	01_col	0.598779	74.2486
124	01_col	0.625868	77.6076
124	01_col	0.623154	77.2711
124	01_col	0.69656	86.3734
124	01_col	0.600557	74.4691
124	01_col	0.604361	74.9408
124	01_col	0.630731	78.2107
124	01_col	0.611874	75.8724
124	01_col	0.690964	85.6795
124	01_col	0.62902	77.9985
124	01_col	0.677773	84.0438
124	01_col	0.657005	81.4687
124	01_col	0.621475	77.0629
124	01_col	0.547321	67.8678
124	01_col	0.635566	78.8101
124	01_col	0.644471	79.9144
124	01_col	0.643236	79.7612
124	01_col	0.592638	73.4871
124	01_col	0.666373	82.6302
124	01_col	0.583847	72.397
124	01_col	0.62659	77.6971
124	01_col	0.682737	84.6594
124	01_col	0.591336	73.3257
124	01_col	0.638227	79.1402
124	01_col	0.637044	78.9935
124	01_col	0.686367	85.1095
124	01_col	0.628813	77.9728
124	01_col	0.677424	84.0005
124	01_col	0.660105	81.853
124	01_col	0.687153	85.207
124	01_col	0.692349	85.8512
124	01_col	0.652404	80.8981
124	01_col	0.706394	87.5929
124	01_col	0.65721	81.4941
124	01_col	0.676721	83.9134
124	01_col	0.717941	89.0246
124	01_col	0.713237	88.4414
124	01_col	0.655008	81.221
124	01_col	0.608396	75.441
124	01_col	0.704264	87.3287
124	01_col	0.634672	78.6994
217	01_col	0.489437	106.208
217	01_col	0.594593	129.027
217	01_col	0.502417	109.024
217	01_col	0.38442	83.4192
217	01_col	0.531692	115.377
217	01_col	0.608614	132.069
217	01_col	0.47821	103.771
217	01_col	0.597689	129.699
217	01_col	0.534954	116.085
217	01_col	0.628392	136.361
217	01_col	0.529974	115.004
217	01_col	0.615139	133.485
217	01_col	0.560262	121.577
217	01_col	0.469116	101.798
217	01_col	0.574023	124.563
217	01_col	0.597463	129.649
217	01_col	0.554648	120.359
217	01_col	0.621624	134.892
217	01_col	0.5335	115.769
217	01_col	0.616221	133.72
217	01_col	0.578298	125.491
217	01_col	0.615624	133.59
217	01_col	0.495446	107.512
217	01_col	0.51804	112.415
217	01_col	0.442471	96.0161
217	01_col	0.567818	123.216
217	01_col	0.525592	114.053
217	01_col	0.599579	130.109
217	01_col	0.580405	125.948
217	01_col	0.615486	133.56
217	01_col	0.586871	127.351
217	01_col	0.633481	137.465
217	01_col	0.61591	133.652
217	01_col	0.533771	115.828
217	01_col	0.621838	134.939
217	01_col	0.372546	80.8426
217	01_col	0.459433	99.6969
217	01_col	0.500298	108.565
217	01_col	0.415649	90.1958
217	01_col	0.578361	125.504
217	01_col	0.62481	135.584
217	01_col	0.582013	126.297
217	01_col	0.381643	82.8164
217	01_col	0.577928	125.41
217	01_col	0.539854	117.148
217	01_col	0.708337	153.709
217	01_col	0.525155	113.959
217	01_col	0.556988	120.866
217	01_col	0.478738	103.886
217	01_col	0.621486	134.862
217	01_col	0.583217	126.558
217	01_col	0.447533	97.1146
217	01_col	0.529839	114.975
217	01_col	0.588762	127.761
217	01_col	0.599889	130.176
217	01_col	0.597754	129.713
217	01_col	0.613586	133.148
217	01_col	0.567833	123.22
217	01_col	0.628804	136.45
217	01_col	0.6179	134.084
217	01_col	0.538604	116.877
217	01_col	0.555816	120.612
217	01_col	0.597255	129.604
217	01_col	0.499782	108.453
217	01_col	0.552462	119.884
217	01_col	0.466054	101.134
217	01_col	0.439606	95.3944
217	01_col	0.57275	124.287
217	01_col	0.548631	119.053
217	01_col	0.589608	127.945
217	01_col	0.537343	116.603
217	01_col	0.639303	138.729
217	01_col	0.493185	107.021
217	01_col	0.555371	120.516
217	01_col	0.534489	115.984
217	01_col	0.639201	138.707
217	01_col	0.519296	112.687
217	01_col	0.50745	110.117
217	01_col	0.539655	117.105
217	01_col	0.51895	112.612
217	01_col	0.622739	135.134
217	01_col	0.552354	119.861
217	01_col	0.616399	133.759
217	01_col	0.580933	126.063
217	01_col	0.532283	115.505
217	01_col	0.433203	94.0051
217	01_col	0.564717	122.543
217	01_col	0.567675	123.186
217	01_col	0.550475	119.453
217	01_col	0.50096	108.708
217	01_col	0.565604	122.736
217	01_col	0.481812	104.553
217	01_col	0.522439	113.369
217	01_col	0.609784	132.323
217	01_col	0.48588	105.436
217	01_col	0.51432	111.607
217	01_col	0.567648	123.18
217	01_col	0.618932	134.308
217	01_col	0.594033	128.905
217	01_col	0.60311	130.875
217	01_col	0.595749	129.278
217	01_col	0.616258	133.728
217	01_col	0.633611	137.494
217	01_col	0.581108	126.101
217	01_col	0.638788	138.617
217	01_col	0.564366	122.467
217	01_col	0.573251	124.396
217	01_col	0.640636	139.018
217	01_col	0.662838	143.836
217	01_col	0.575731	124.934
217	01_col	0.4848	105.201
217	01_col	0.645978	140.177
217	01_col	0.534899	116.073
325	01_col	0.389037	126.437
325	01_col	0.525396	170.754
325	01_col	0.385804	125.386
325	01_col	0.317623	103.227
325	01_col	0.409856	133.203
325	01_col	0.537072	174.548
325	01_col	0.392791	127.657
325	01_col	0.527344	171.387
325	01_col	0.444395	144.428
325	01_col	0.5584	181.48
325	01_col	0.445489	144.784
325	01_col	0.536881	174.486
325	01_col	0.470007	152.752
325	01_col	0.37967	123.393
325	01_col	0.49797	161.84
325	01_col	0.527849	171.551
325	01_col	0.490754	159.495
325	01_col	0.558239	181.428
325	01_col	0.45983	149.445
325	01_col	0.543519	176.644
325	01_col	0.511349	166.188
325	01_col	0.555629	180.579
325	01_col	0.422827	137.419
325	01_col	0.44252	143.819
325	01_col	0.353973	115.041
325	01_col	0.473754	153.97
325	01_col	0.43273	140.637
325	01_col	0.524525	170.47
325	01_col	0.491906	159.869
325	01_col	0.539869	175.458
325	01_col	0.508134	165.143
325	01_col	0.556826	180.968
325	01_col	0.542525	176.321
325	01_col	0.437405	142.156
325	01_col	0.547274	177.864
325	01_col	0.277175	90.0819
325	01_col	0.36203	117.66
325	01_col	0.376451	122.347
325	01_col	0.31942	103.812
325	01_col	0.494563	160.733
325	01_col	0.555406	180.507
325	01_col	0.503316	163.578
325	01_col	0.307016	99.7804
325	01_col	0.48005	156.016
325	01_col	0.454967	147.864
325	01_col	0.697376	226.647
325	01_col	0.436559	141.882
325	01_col	0.480398	156.129
325	01_col	0.380777	123.752
325	01_col	0.556894	180.991
325	01_col	0.490167	159.304
325	01_col	0.339921	110.474
325	01_col	0.456006	148.202
325	01_col	0.513948	167.033
325	01_col	0.531827	172.844
325	01_col	0.513282	166.817
325	01_col	0.544888	177.088
325	01_col	0.452264	146.986
325	01_col	0.561626	182.528
325	01_col	0.545314	177.227
325	01_col	0.460354	149.615
325	01_col	0.472559	153.582
325	01_col	0.517528	168.196
325	01_col	0.466083	151.477
325	01_col	0.462363	150.268
325	01_col	0.34899	113.422
325	01_col	0.333716	108.458
325	01_col	0.490735	159.489
325	01_col	0.45272	147.134
325	01_col	0.514956	167.361
325	01_col	0.442596	143.844
325	01_col	0.568675	184.819
325	01_col	0.416508	135.365
325	01_col	0.486396	158.079
325	01_col	0.436884	141.987
325	01_col	0.563678	183.195
325	01_col	0.438141	142.396
325	01_col	0.407009	132.278
325	01_col	0.43028	139.841
325	01_col	0.406215	132.02
325	01_col	0.537459	174.674
325	01_col	0.470715	152.982
325	01_col	0.542122	176.19
325	01_col	0.483959	157.287
325	01_col	0.413468	134.377
325	01_col	0.349648	113.636
325	01_col	0.468884	152.387
325	01_col	0.47134	153.185
325	01_col	0.458443	148.994
325	01_col	0.405866	131.906
325	01_col	0.479224	155.748
325	01_col	0.389536	126.599
325	01_col	0.432834	140.671
325	01_col	0.539562	175.358
325	01_col	0.401292	130.42
325	01_col	0.403111	131.011
325	01_col	0.493495	160.386
325	01_col	0.534985	173.87
325	01_col	0.529969	172.24
325	01_col	0.527495	171.436
325	01_col	0.536225	174.273
325	01_col	0.543086	176.503
325	01_col	0.562313	182.752
325	01_col	0.502459	163.299
325	01_col	0.561265	182.411
325	01_col	0.48407	157.323
325	01_col	0.4586	149.045
325	01_col	0.581123	188.865
325	01_col	0.594847	193.325
325	01_col	0.495386	161.001
325	01_col	0.419943	136.481
325	01_col	0.526092	170.98
325	01_col	0.459851	149.452
480	01_col	0.305318	146.553
480	01_col	0.435809	209.188
480	01_col	0.280769	134.769
480	01_col	0.220834	106
480	01_col	0.308963	148.302
480	01_col	0.437635	210.065
480	01_col	0.304605	146.21
480	01_col	0.441731	212.031
480	01_col	0.370997	178.079
480	01_col	0.472829	226.958
480	01_col	0.357935	171.809
480	01_col	0.457366	219.536
480	01_col	0.377259	181.084
480	01_col	0.283198	135.935
480	01_col	0.424979	203.99
480	01_col	0.445347	213.767
480	01_col	0.39622	190.186
480	01_col	0.477528	229.213
480	01_col	0.354677	170.245
480	01_col	0.466676	224.005
480	01_col	0.392606	188.451
480	01_col	0.473997	227.519
480	01_col	0.318841	153.043
480	01_col	0.323869	155.457
480	01_col	0.26315	126.312
480	01_col	0.37994	182.371
480	01_col	0.355753	170.761
480	01_col	0.437271	209.89
480	01_col	0.396813	190.47
480	01_col	0.46257	222.034
480	01_col	0.432145	207.43
480	01_col	0.467591	224.444
480	01_col	0.444609	213.412
480	01_col	0.356879	171.302
480	01_col	0.470817	225.992
480	01_col	0.199343	95.6847
480	01_col	0.261269	125.409
480	01_col	0.292721	140.506
480	01_col	0.242141	116.228
480	01_col	0.408595	196.126
480	01_col	0.465442	223.412
480	01_col	0.404724	194.267
480	01_col	0.205607	98.6916
480	01_col	0.386904	185.714
480	01_col	0.367448	176.375
480	01_col	0.571088	274.122
480	01_col	0.32773	157.31
480	01_col	0.389359	186.893
480	01_col	0.291141	139.748
480	01_col	0.457737	219.714
480	01_col	0.367144	176.229
480	01_col	0.249447	119.734
480	01_col	0.361781	173.655
480	01_col	0.425929	204.446
480	01_col	0.440785	211.577
480	01_col	0.414935	199.169
480	01_col	0.448972	215.506
480	01_col	0.363183	174.328
480	01_col	0.480963	230.862
480	01_col	0.466623	223.979
480	01_col	0.352872	169.379
480	01_col	0.371772	178.451
480	01_col	0.442693	212.493
480	01_col	0.313686	150.569
480	01_col	0.351672	168.803
480	01_col	0.272278	130.694
480	01_col	0.224069	107.553
480	01_col	0.379338	182.082
480	01_col	0.332474	159.587
480	01_col	0.439427	210.925
480	01_col	0.349873	167.939
480	01_col	0.47773	229.311
480	01_col	0.324243	155.637
480	01_col	0.398497	191.279
480	01_col	0.334257	160.443
480	01_col	0.487922	234.203
480	01_col	0.354316	170.072
480	01_col	0.333787	160.218
480	01_col	0.328875	157.86
480	01_col	0.312427	149.965
480	01_col	0.454012	217.926
480	01_col	0.375595	180.286
480	01_col	0.451571	216.754
480	01_col	0.384435	184.529
480	01_col	0.317962	152.622
480	01_col	0.256371	123.058
480	01_col	0.374798	179.903
480	01_col	0.383242	183.956
480	01_col	0.33411	160.373
480	01_col	0.292724	140.508
480	01_col	0.377281	181.095
480	01_col	0.307708	147.7
480	01_col	0.344577	165.397
480	01_col	0.451034	216.496
480	01_col	0.319115	153.175
480	01_col	0.328358	157.612
480	01_col	0.402276	193.092
480	01_col	0.473016	227.048
480	01_col	0.450408	216.196
480	01_col	0.434303	208.465
480	01_col	0.442023	212.171
480	01_col	0.443518	212.889
480	01_col	0.472967	227.024
480	01_col	0.399204	191.618
480	01_col	0.448479	215.27
480	01_col	0.395438	189.81
480	01_col	0.33756	162.029
480	01_col	0.526039	252.499
480	01_col	0.513017	246.248
480	01_col	0.395534	189.856
480	01_col	0.315954	151.658
480	01_col	0.406221	194.986
480	01_col	0.339847	163.127
665	01_col	0.208466	138.63
665	01_col	0.359172	238.85
665	01_col	0.217065	144.348
665	01_col	0.175439	116.667
665	01_col	0.243036	161.619
665	01_col	0.365674	243.173
665	01_col	0.246535	163.946
665	01_col	0.342379	227.682
665	01_col	0.269696	179.348
665	01_col	0.395107	262.746
665	01_col	0.284229	189.012
665	01_col	0.369136	245.476
665	01_col	0.323042	214.823
665	01_col	0.195094	129.738
665	01_col	0.313373	208.393
665	01_col	0.365373	242.973
665	01_col	0.306151	203.59
665	01_col	0.37632	250.252
665	01_col	0.289585	192.574
665	01_col	0.377697	251.169
665	01_col	0.282941	188.156
665	01_col	0.407948	271.285
665	01_col	0.264362	175.801
665	01_col	0.23335	155.178
665	01_col	0.184277	122.544
665	01_col	0.276212	183.681
665	01_col	0.283126	188.279
665	01_col	0.362349	240.962
665	01_col	0.330059	219.489
665	01_col	0.381205	253.501
665	01_col	0.385012	256.033
665	01_col	0.382687	254.487
665	01_col	0.380343	252.928
665	01_col	0.24514	163.018
665	01_col	0.374041	248.737
665	01_col	0.163113	108.47
665	01_col	0.201634	134.087
665	01_col	0.267717	178.031
665	01_col	0.176873	117.62
665	01_col	0.339712	225.909
665	01_col	0.384979	256.011
665	01_col	0.323399	215.06
665	01_col	0.143989	95.7529
665	01_col	0.332151	220.881
665	01_col	0.319052	212.169
665	01_col	0.576451	383.34
665	01_col	0.256775	170.756
665	01_col	0.309535	205.841
665	01_col	0.212442	141.274
665	01_col	0.385127	256.109
665	01_col	0.289614	192.593
665	01_col	0.232481	154.6
665	01_col	0.276265	183.716
665	01_col	0.377885	251.294
665	01_col	0.36712	244.135
665	01_col	0.334332	222.331
665	01_col	0.363293	241.59
665	01_col	0.290217	192.994
665	01_col	0.404843	269.22
665	01_col	0.385396	256.289
665	01_col	0.305268	203.003
665	01_col	0.304725	202.642
665	01_col	0.350287	232.941
665	01_col	0.271043	180.244
665	01_col	0.267179	177.674
665	01_col	0.221557	147.336
665	01_col	0.20481	136.198
665	01_col	0.301422	200.446
665	01_col	0.257629	171.324
665	01_col	0.360382	239.654
665	01_col	0.295177	196.293
665	01_col	0.408739	271.811
665	01_col	0.254825	169.459
665	01_col	0.321385	213.721
665	01_col	0.265523	176.573
665	01_col	0.40378	268.514
665	01_col	0.27996	186.173
665	01_col	0.267315	177.764
665	01_col	0.267213	177.697
665	01_col	0.242746	161.426
665	01_col	0.364284	242.249
665	01_col	0.289565	192.561
665	01_col	0.371559	247.087
665	01_col	0.305742	203.319
665	01_col	0.260046	172.931
665	01_col	0.17469	116.169
665	01_col	0.283242	188.356
665	01_col	0.305569	203.203
665	01_col	0.248362	165.161
665	01_col	0.227942	151.581
665	01_col	0.320745	213.296
665	01_col	0.243067	161.64
665	01_col	0.287425	191.137
665	01_col	0.366222	243.538
665	01_col	0.224061	149.001
665	01_col	0.264821	176.106
665	01_col	0.305656	203.261
665	01_col	0.374425	248.993
665	01_col	0.306477	203.807
665	01_col	0.342572	227.81
665	01_col	0.35617	236.853
665	01_col	0.392122	260.761
665	01_col	0.385867	256.602
665	01_col	0.326148	216.888
665	01_col	0.371179	246.834
665	01_col	0.319257	212.306
665	01_col	0.278256	185.04
665	01_col	0.4695	312.218
665	01_col	0.437143	290.7
665	01_col	0.333656	221.881
665	01_col	0.224024	148.976
665	01_col	0.334826	222.659
665	01_col	0.278577	185.254
866	01_col	0.19518	169.026
866	01_col	0.309271	267.829
866	01_col	0.168174	145.638
866	01_col	0.149171	129.182
866	01_col	0.188407	163.161
866	01_col	0.287729	249.173
866	01_col	0.220454	190.913
866	01_col	0.302958	262.361
866	01_col	0.215427	186.56
866	01_col	0.327401	283.529
866	01_col	0.228343	197.745
866	01_col	0.300896	260.576
866	01_col	0.250943	217.317
866	01_col	0.193658	167.708
866	01_col	0.276587	239.525
866	01_col	0.303467	262.802
866	01_col	0.272961	236.385
866	01_col	0.295181	255.627
866	01_col	0.2189	189.568
866	01_col	0.316165	273.799
866	01_col	0.220849	191.255
866	01_col	0.349234	302.437
866	01_col	0.202291	175.184
866	01_col	0.179987	155.869
866	01_col	0.137545	119.114
866	01_col	0.209143	181.118
866	01_col	0.210649	182.422
866	01_col	0.292519	253.322
866	01_col	0.26314	227.879
866	01_col	0.321889	278.756
866	01_col	0.289259	250.498
866	01_col	0.306543	265.466
866	01_col	0.307327	266.145
866	01_col	0.186099	161.161
866	01_col	0.294371	254.925
866	01_col	0.095963	83.1039
866	01_col	0.138943	120.324
866	01_col	0.200474	173.61
866	01_col	0.129156	111.849
866	01_col	0.268211	232.271
866	01_col	0.30805	266.771
866	01_col	0.244712	211.921
866	01_col	0.094021	81.4222
866	01_col	0.217303	188.184
866	01_col	0.239833	207.696
866	01_col	0.378428	327.719
866	01_col	0.201526	174.521
866	01_col	0.27044	234.201
866	01_col	0.178951	154.971
866	01_col	0.310423	268.826
866	01_col	0.22009	190.598
866	01_col	0.153463	132.899
866	01_col	0.223061	193.171
866	01_col	0.307061	265.915
866	01_col	0.307608	266.389
866	01_col	0.298812	258.771
866	01_col	0.310758	269.116
866	01_col	0.181924	157.546
866	01_col	0.322016	278.865
866	01_col	0.308593	267.242
866	01_col	0.222696	192.855
866	01_col	0.225588	195.36
866	01_col	0.280217	242.668
866	01_col	0.157936	136.773
866	01_col	0.209372	181.316
866	01_col	0.169878	147.115
866	01_col	0.117672	101.904
866	01_col	0.231105	200.137
866	01_col	0.209192	181.16
866	01_col	0.299478	259.348
866	01_col	0.234217	202.832
866	01_col	0.339698	294.178
866	01_col	0.223673	193.701
866	01_col	0.276688	239.612
866	01_col	0.201468	174.471
866	01_col	0.327572	283.677
866	01_col	0.204712	177.281
866	01_col	0.199096	172.417
866	01_col	0.213431	184.832
866	01_col	0.183861	159.223
866	01_col	0.310448	268.848
866	01_col	0.241401	209.053
866	01_col	0.305368	264.448
866	01_col	0.261249	226.242
866	01_col	0.200948	174.021
866	01_col	0.143514	124.283
866	01_col	0.236686	204.97
866	01_col	0.254255	220.184
866	01_col	0.180758	156.536
866	01_col	0.190817	165.247
866	01_col	0.229549	198.79
866	01_col	0.187175	162.093
866	01_col	0.218484	189.208
866	01_col	0.301799	261.358
866	01_col	0.169242	146.564
866	01_col	0.200594	173.714
866	01_col	0.255617	221.364
866	01_col	0.320649	277.682
866	01_col	0.201891	174.837
866	01_col	0.282188	244.375
866	01_col	0.305892	264.903
866	01_col	0.298252	258.286
866	01_col	0.321199	278.159
866	01_col	0.24052	208.291
866	01_col	0.280483	242.898
866	01_col	0.25859	223.939
866	01_col	0.216161	187.195
866	01_col	0.352515	305.278
866	01_col	0.371339	321.58
866	01_col	0.297532	257.663
866	01_col	0.119537	103.519
866	01_col	0.229499	198.746
866	01_col	0.215734	186.826
1098	01_col	0.169683	186.312
1098	01_col	0.227992	250.335
1098	01_col	0.110407	121.226
1098	01_col	0.0760915	83.5485
1098	01_col	0.149135	163.751
1098	01_col	0.236989	260.213
1098	01_col	0.136085	149.421
1098	01_col	0.231876	254.6
1098	01_col	0.169642	186.267
1098	01_col	0.247575	271.837
1098	01_col	0.171321	188.111
1098	01_col	0.252419	277.156
1098	01_col	0.214073	235.052
1098	01_col	0.159551	175.187
1098	01_col	0.219883	241.431
1098	01_col	0.244058	267.976
1098	01_col	0.224427	246.42
1098	01_col	0.225608	247.718
1098	01_col	0.197558	216.918
1098	01_col	0.253777	278.647
1098	01_col	0.194287	213.327
1098	01_col	0.302441	332.08
1098	01_col	0.155116	170.317
1098	01_col	0.129421	142.105
1098	01_col	0.12364	135.756
1098	01_col	0.171769	188.603
1098	01_col	0.196623	215.892
1098	01_col	0.23789	261.203
1098	01_col	0.219316	240.809
1098	01_col	0.27289	299.633
1098	01_col	0.256302	281.42
1098	01_col	0.262997	288.771
1098	01_col	0.265181	291.169
1098	01_col	0.139217	152.86
1098	01_col	0.251107	275.716
1098	01_col	0.0809731	88.9085
1098	01_col	0.126594	139
1098	01_col	0.170317	187.008
1098	01_col	0.109639	120.383
1098	01_col	0.245228	269.261
1098	01_col	0.265013	290.985
1098	01_col	0.212664	233.505
1098	01_col	0.0634731	69.6934
1098	01_col	0.194948	214.052
1098	01_col	0.221909	243.656
1098	01_col	0.342461	376.022
1098	01_col	0.173976	191.026
1098	01_col	0.193426	212.382
1098	01_col	0.147897	162.391
1098	01_col	0.262693	288.437
1098	01_col	0.20184	221.62
1098	01_col	0.181169	198.924
1098	01_col	0.177789	195.212
1098	01_col	0.225224	247.296
1098	01_col	0.24087	264.475
1098	01_col	0.21831	239.705
1098	01_col	0.246706	270.883
1098	01_col	0.134247	147.403
1098	01_col	0.278738	306.054
1098	01_col	0.266266	292.36
1098	01_col	0.190092	208.721
1098	01_col	0.195016	214.127
1098	01_col	0.224087	246.048
1098	01_col	0.107506	118.041
1098	01_col	0.154373	169.501
1098	01_col	0.105651	116.005
1098	01_col	0.110472	121.298
1098	01_col	0.17178	188.615
1098	01_col	0.153926	169.011
1098	01_col	0.230592	253.19
1098	01_col	0.179906	197.537
1098	01_col	0.291668	320.252
1098	01_col	0.170722	187.453
1098	01_col	0.220886	242.533
1098	01_col	0.182475	200.357
1098	01_col	0.252731	277.499
1098	01_col	0.150338	165.071
1098	01_col	0.148264	162.794
1098	01_col	0.231223	253.883
1098	01_col	0.144132	158.257
1098	01_col	0.254232	279.147
1098	01_col	0.19125	209.993
1098	01_col	0.25611	281.209
1098	01_col	0.18846	206.929
1098	01_col	0.172904	189.849
1098	01_col	0.130175	142.933
1098	01_col	0.193879	212.88
1098	01_col	0.176969	194.312
1098	01_col	0.146367	160.711
1098	01_col	0.101153	111.066
1098	01_col	0.187755	206.155
1098	01_col	0.156978	172.362
1098	01_col	0.190895	209.603
1098	01_col	0.247244	271.473
1098	01_col	0.162014	177.892
1098	01_col	0.224053	246.01
1098	01_col	0.207354	227.674
1098	01_col	0.259553	284.989
1098	01_col	0.233427	256.302
1098	01_col	0.218445	239.853
1098	01_col	0.235716	258.816
1098	01_col	0.248823	273.207
1098	01_col	0.26212	287.807
1098	01_col	0.227492	249.786
1098	01_col	0.251182	275.798
1098	01_col	0.186827	205.136
1098	01_col	0.163945	180.012
1098	01_col	0.349299	383.53
1098	01_col	0.325938	357.88
1098	01_col	0.23195	254.681
1098	01_col	0.0862612	94.7148
1098	01_col	0.307976	338.158
1098	01_col	0.186525	204.804
27	02_OXRSH1	0.735985	19.8716
27	02_OXRSH1	0.730955	19.7358
27	02_OXRSH1	0.671796	18.1385
27	02_OXRSH1	0.716631	19.349
27	02_OXRSH1	0.690026	18.6307
27	02_OXRSH1	0.700212	18.9057
27	02_OXRSH1	0.711058	19.1986
27	02_OXRSH1	0.731498	19.7504
27	02_OXRSH1	0.720949	19.4656
27	02_OXRSH1	0.690166	18.6345
27	02_OXRSH1	0.721775	19.4879
27	02_OXRSH1	0.726742	19.622
27	02_OXRSH1	0.708419	19.1273
27	02_OXRSH1	0.73733	19.9079
27	02_OXRSH1	0.737184	19.904
27	02_OXRSH1	0.644928	17.413
27	02_OXRSH1	0.678783	18.3271
27	02_OXRSH1	0.679812	18.3549
27	02_OXRSH1	0.706697	19.0808
27	02_OXRSH1	0.710738	19.1899
27	02_OXRSH1	0.669733	18.0828
27	02_OXRSH1	0.728356	19.6656
27	02_OXRSH1	0.732105	19.7668
27	02_OXRSH1	0.734278	19.8255
27	02_OXRSH1	0.701817	18.9491
27	02_OXRSH1	0.730883	19.7338
27	02_OXRSH1	0.694087	18.7403
27	02_OXRSH1	0.701861	18.9503
27	02_OXRSH1	0.681365	18.3969
27	02_OXRSH1	0.75069	20.2686
27	02_OXRSH1	0.733906	19.8155
27	02_OXRSH1	0.749434	20.2347
27	02_OXRSH1	0.756669	20.4301
27	02_OXRSH1	0.716368	19.3419
27	02_OXRSH1	0.696983	18.8185
27	02_OXRSH1	0.651866	17.6004
27	02_OXRSH1	0.69859	18.8619
27	02_OXRSH1	0.724035	19.549
27	02_OXRSH1	0.730395	19.7207
27	02_OXRSH1	0.658468	17.7786
27	02_OXRSH1	0.731158	19.7413
27	02_OXRSH1	0.653922	17.6559
27	02_OXRSH1	0.71529	19.3128
27	02_OXRSH1	0.659896	17.8172
27	02_OXRSH1	0.666677	18.0003
27	02_OXRSH1	0.746082	20.1442
27	02_OXRSH1	0.708929	19.1411
27	02_OXRSH1	0.706149	19.066
27	02_OXRSH1	0.723753	19.5413
27	02_OXRSH1	0.686063	18.5237
27	02_OXRSH1	0.751413	20.2882
27	02_OXRSH1	0.763997	20.6279
27	02_OXRSH1	0.740577	19.9956
27	02_OXRSH1	0.723656	19.5387
27	02_OXRSH1	0.652171	17.6086
27	02_OXRSH1	0.755044	20.3862
27	02_OXRSH1	0.670556	18.105
27	02_OXRSH1	0.669896	18.0872
27	02_OXRSH1	0.693078	18.7131
27	02_OXRSH1	0.719322	19.4217
27	02_OXRSH1	0.736879	19.8957
27	02_OXRSH1	0.715992	19.3318
27	02_OXRSH1	0.730053	19.7114
27	02_OXRSH1	0.743818	20.0831
27	02_OXRSH1	0.735544	19.8597
27	02_OXRSH1	0.714984	19.3046
27	02_OXRSH1	0.704148	19.012
27	02_OXRSH1	0.736167	19.8765
27	02_OXRSH1	0.728273	19.6634
27	02_OXRSH1	0.730802	19.7317
27	02_OXRSH1	0.74021	19.9857
27	02_OXRSH1	0.750085	20.2523
27	02_OXRSH1	0.735306	19.8533
27	02_OXRSH1	0.772469	20.8566
27	02_OXRSH1	0.744201	20.0934
27	02_OXRSH1	0.709424	19.1544
27	02_OXRSH1	0.703695	18.9998
27	02_OXRSH1	0.728863	19.6793
27	02_OXRSH1	0.711303	19.2052
27	02_OXRSH1	0.724229	19.5542
27	02_OXRSH1	0.662953	17.8997
27	02_OXRSH1	0.75497	20.3842
27	02_OXRSH1	0.734829	19.8404
27	02_OXRSH1	0.679536	18.3475
27	02_OXRSH1	0.690383	18.6404
27	02_OXRSH1	0.67664	18.2693
27	02_OXRSH1	0.69455	18.7529
27	02_OXRSH1	0.692765	18.7047
27	02_OXRSH1	0.67504	18.2261
27	02_OXRSH1	0.699663	18.8909
27	02_OXRSH1	0.730511	19.7238
27	02_OXRSH1	0.737364	19.9088
27	02_OXRSH1	0.755115	20.3881
27	02_OXRSH1	0.757806	20.4608
27	02_OXRSH1	0.741146	20.0109
27	02_OXRSH1	0.747838	20.1916
27	02_OXRSH1	0.773855	20.8941
27	02_OXRSH1	0.690036	18.631
27	02_OXRSH1	0.704107	19.0109
27	02_OXRSH1	0.725947	19.6006
27	02_OXRSH1	0.662022	17.8746
27	02_OXRSH1	0.723526	19.5352
27	02_OXRSH1	0.745731	20.1347
27	02_OXRSH1	0.70926	19.15
27	02_OXRSH1	0.749521	20.2371
27	02_OXRSH1	0.718902	19.4104
27	02_OXRSH1	0.75046	20.2624
27	02_OXRSH1	0.747936	20.1943
27	02_OXRSH1	0.72983	19.7054
27	02_OXRSH1	0.779946	21.0585
27	02_OXRSH1	0.711481	19.21
27	02_OXRSH1	0.697961	18.8449
27	02_OXRSH1	0.751191	20.2822
27	02_OXRSH1	0.665301	17.9631
27	02_OXRSH1	0.800574	21.6155
65	02_OXRSH1	0.723176	47.0064
65	02_OXRSH1	0.713824	46.3985
65	02_OXRSH1	0.663265	43.1122
65	02_OXRSH1	0.708621	46.0603
65	02_OXRSH1	0.666934	43.3507
65	02_OXRSH1	0.679813	44.1878
65	02_OXRSH1	0.699843	45.4898
65	02_OXRSH1	0.711682	46.2593
65	02_OXRSH1	0.714966	46.4728
65	02_OXRSH1	0.671554	43.651
65	02_OXRSH1	0.707822	46.0085
65	02_OXRSH1	0.710229	46.1649
65	02_OXRSH1	0.695303	45.1947
65	02_OXRSH1	0.719825	46.7886
65	02_OXRSH1	0.726716	47.2365
65	02_OXRSH1	0.5945	38.6425
65	02_OXRSH1	0.652252	42.3964
65	02_OXRSH1	0.663433	43.1231
65	02_OXRSH1	0.689815	44.838
65	02_OXRSH1	0.702236	45.6453
65	02_OXRSH1	0.663756	43.1442
65	02_OXRSH1	0.709281	46.1033
65	02_OXRSH1	0.714455	46.4396
65	02_OXRSH1	0.720016	46.801
65	02_OXRSH1	0.684602	44.4991
65	02_OXRSH1	0.704674	45.8038
65	02_OXRSH1	0.668206	43.4334
65	02_OXRSH1	0.668984	43.484
65	02_OXRSH1	0.652601	42.419
65	02_OXRSH1	0.739274	48.0528
65	02_OXRSH1	0.718358	46.6933
65	02_OXRSH1	0.702928	45.6903
65	02_OXRSH1	0.726144	47.1993
65	02_OXRSH1	0.703274	45.7128
65	02_OXRSH1	0.674006	43.8104
65	02_OXRSH1	0.631535	41.0498
65	02_OXRSH1	0.65676	42.6894
65	02_OXRSH1	0.712488	46.3117
65	02_OXRSH1	0.71414	46.4191
65	02_OXRSH1	0.651879	42.3721
65	02_OXRSH1	0.713685	46.3896
65	02_OXRSH1	0.635541	41.3101
65	02_OXRSH1	0.707048	45.9581
65	02_OXRSH1	0.654037	42.5124
65	02_OXRSH1	0.655886	42.6326
65	02_OXRSH1	0.727024	47.2565
65	02_OXRSH1	0.685547	44.5605
65	02_OXRSH1	0.690314	44.8704
65	02_OXRSH1	0.707489	45.9868
65	02_OXRSH1	0.64804	42.1226
65	02_OXRSH1	0.737703	47.9507
65	02_OXRSH1	0.745739	48.473
65	02_OXRSH1	0.726236	47.2054
65	02_OXRSH1	0.710493	46.182
65	02_OXRSH1	0.58585	38.0803
65	02_OXRSH1	0.736543	47.8753
65	02_OXRSH1	0.644253	41.8764
65	02_OXRSH1	0.657146	42.7145
65	02_OXRSH1	0.675863	43.9311
65	02_OXRSH1	0.699156	45.4451
65	02_OXRSH1	0.720946	46.8615
65	02_OXRSH1	0.703289	45.7138
65	02_OXRSH1	0.713066	46.3493
65	02_OXRSH1	0.724483	47.0914
65	02_OXRSH1	0.718996	46.7348
65	02_OXRSH1	0.695931	45.2355
65	02_OXRSH1	0.682211	44.3437
65	02_OXRSH1	0.717805	46.6573
65	02_OXRSH1	0.702059	45.6339
65	02_OXRSH1	0.718328	46.6913
65	02_OXRSH1	0.712314	46.3004
65	02_OXRSH1	0.724835	47.1143
65	02_OXRSH1	0.709644	46.1269
65	02_OXRSH1	0.755247	49.0911
65	02_OXRSH1	0.727416	47.282
65	02_OXRSH1	0.691778	44.9656
65	02_OXRSH1	0.663246	43.111
65	02_OXRSH1	0.704125	45.7681
65	02_OXRSH1	0.690716	44.8965
65	02_OXRSH1	0.690174	44.8613
65	02_OXRSH1	0.65713	42.7135
65	02_OXRSH1	0.740098	48.1064
65	02_OXRSH1	0.72371	47.0412
65	02_OXRSH1	0.670203	43.5632
65	02_OXRSH1	0.666437	43.3184
65	02_OXRSH1	0.658241	42.7856
65	02_OXRSH1	0.628566	40.8568
65	02_OXRSH1	0.651044	42.3179
65	02_OXRSH1	0.64385	41.8502
65	02_OXRSH1	0.677999	44.0699
65	02_OXRSH1	0.716612	46.5798
65	02_OXRSH1	0.719875	46.7919
65	02_OXRSH1	0.739177	48.0465
65	02_OXRSH1	0.745898	48.4834
65	02_OXRSH1	0.70881	46.0727
65	02_OXRSH1	0.72712	47.2628
65	02_OXRSH1	0.745973	48.4883
65	02_OXRSH1	0.678665	44.1132
65	02_OXRSH1	0.689863	44.8411
65	02_OXRSH1	0.710793	46.2015
65	02_OXRSH1	0.664937	43.2209
65	02_OXRSH1	0.731998	47.5799
65	02_OXRSH1	0.733507	47.678
65	02_OXRSH1	0.694513	45.1434
65	02_OXRSH1	0.739082	48.0404
65	02_OXRSH1	0.680625	44.2406
65	02_OXRSH1	0.731823	47.5685
65	02_OXRSH1	0.741954	48.227
65	02_OXRSH1	0.714542	46.4452
65	02_OXRSH1	0.758337	49.2919
65	02_OXRSH1	0.681067	44.2693
65	02_OXRSH1	0.666416	43.317
65	02_OXRSH1	0.743258	48.3118
65	02_OXRSH1	0.651867	42.3713
65	02_OXRSH1	0.814999	52.9749
124	02_OXRSH1	0.683031	84.6958
124	02_OXRSH1	0.670728	83.1702
124	02_OXRSH1	0.612983	76.0099
124	02_OXRSH1	0.670146	83.0981
124	02_OXRSH1	0.619493	76.8171
124	02_OXRSH1	0.638364	79.1571
124	02_OXRSH1	0.646213	80.1304
124	02_OXRSH1	0.667626	82.7856
124	02_OXRSH1	0.630379	78.167
124	02_OXRSH1	0.599769	74.3714
124	02_OXRSH1	0.665865	82.5673
124	02_OXRSH1	0.666229	82.6124
124	02_OXRSH1	0.634165	78.6365
124	02_OXRSH1	0.68364	84.7714
124	02_OXRSH1	0.67357	83.5227
124	02_OXRSH1	0.486844	60.3687
124	02_OXRSH1	0.548711	68.0401
124	02_OXRSH1	0.603943	74.8889
124	02_OXRSH1	0.631377	78.2907
124	02_OXRSH1	0.631626	78.3216
124	02_OXRSH1	0.570537	70.7465
124	02_OXRSH1	0.666822	82.6859
124	02_OXRSH1	0.666618	82.6606
124	02_OXRSH1	0.666999	82.7079
124	02_OXRSH1	0.642605	79.683
124	02_OXRSH1	0.678006	84.0728
124	02_OXRSH1	0.616473	76.4427
124	02_OXRSH1	0.58444	72.4706
124	02_OXRSH1	0.575192	71.3239
124	02_OXRSH1	0.697114	86.4421
124	02_OXRSH1	0.681421	84.4962
124	02_OXRSH1	0.65313	80.9881
124	02_OXRSH1	0.650006	80.6007
124	02_OXRSH1	0.649348	80.5191
124	02_OXRSH1	0.611412	75.8151
124	02_OXRSH1	0.580266	71.953
124	02_OXRSH1	0.549409	68.1267
124	02_OXRSH1	0.655928	81.3351
124	02_OXRSH1	0.670093	83.0916
124	02_OXRSH1	0.565326	70.1004
124	02_OXRSH1	0.669105	82.969
124	02_OXRSH1	0.59026	73.1923
124	02_OXRSH1	0.632527	78.4334
124	02_OXRSH1	0.607542	75.3352
124	02_OXRSH1	0.589984	73.1581
124	02_OXRSH1	0.684249	84.8469
124	02_OXRSH1	0.63368	78.5764
124	02_OXRSH1	0.630688	78.2053
124	02_OXRSH1	0.660103	81.8527
124	02_OXRSH1	0.582357	72.2123
124	02_OXRSH1	0.703385	87.2198
124	02_OXRSH1	0.704127	87.3117
124	02_OXRSH1	0.693673	86.0155
124	02_OXRSH1	0.666378	82.6309
124	02_OXRSH1	0.5337	66.1788
124	02_OXRSH1	0.68937	85.4819
124	02_OXRSH1	0.586055	72.6708
124	02_OXRSH1	0.605403	75.07
124	02_OXRSH1	0.615008	76.261
124	02_OXRSH1	0.628283	77.907
124	02_OXRSH1	0.66445	82.3918
124	02_OXRSH1	0.65598	81.3415
124	02_OXRSH1	0.668931	82.9475
124	02_OXRSH1	0.684278	84.8505
124	02_OXRSH1	0.679103	84.2088
124	02_OXRSH1	0.62981	78.0965
124	02_OXRSH1	0.626217	77.6509
124	02_OXRSH1	0.668763	82.9267
124	02_OXRSH1	0.656332	81.3851
124	02_OXRSH1	0.670276	83.1143
124	02_OXRSH1	0.685005	84.9406
124	02_OXRSH1	0.693903	86.044
124	02_OXRSH1	0.680395	84.369
124	02_OXRSH1	0.704208	87.3218
124	02_OXRSH1	0.667701	82.7949
124	02_OXRSH1	0.62867	77.9551
124	02_OXRSH1	0.57328	71.0867
124	02_OXRSH1	0.624069	77.3845
124	02_OXRSH1	0.616992	76.507
124	02_OXRSH1	0.67448	83.6356
124	02_OXRSH1	0.608717	75.4809
124	02_OXRSH1	0.705158	87.4396
124	02_OXRSH1	0.686775	85.1602
124	02_OXRSH1	0.600991	74.5229
124	02_OXRSH1	0.589343	73.0785
124	02_OXRSH1	0.610539	75.7068
124	02_OXRSH1	0.526881	65.3333
124	02_OXRSH1	0.528784	65.5692
124	02_OXRSH1	0.534678	66.3001
124	02_OXRSH1	0.625543	77.5673
124	02_OXRSH1	0.673138	83.4691
124	02_OXRSH1	0.684193	84.8399
124	02_OXRSH1	0.682903	84.68
124	02_OXRSH1	0.710263	88.0726
124	02_OXRSH1	0.656296	81.3807
124	02_OXRSH1	0.690826	85.6624
124	02_OXRSH1	0.711303	88.2016
124	02_OXRSH1	0.622034	77.1322
124	02_OXRSH1	0.62147	77.0623
124	02_OXRSH1	0.664537	82.4026
124	02_OXRSH1	0.589443	73.0909
124	02_OXRSH1	0.642293	79.6443
124	02_OXRSH1	0.696442	86.3588
124	02_OXRSH1	0.633906	78.6043
124	02_OXRSH1	0.704532	87.362
124	02_OXRSH1	0.606989	75.2667
124	02_OXRSH1	0.689759	85.5302
124	02_OXRSH1	0.693858	86.0384
124	02_OXRSH1	0.657567	81.5384
124	02_OXRSH1	0.718016	89.034
124	02_OXRSH1	0.625057	77.507
124	02_OXRSH1	0.60186	74.6306
124	02_OXRSH1	0.697061	86.4355
124	02_OXRSH1	0.58209	72.1792
124	02_OXRSH1	0.752304	93.2857
217	02_OXRSH1	0.623823	135.37
217	02_OXRSH1	0.614756	133.402
217	02_OXRSH1	0.511829	111.067
217	02_OXRSH1	0.596235	129.383
217	02_OXRSH1	0.521447	113.154
217	02_OXRSH1	0.562608	122.086
217	02_OXRSH1	0.572648	124.265
217	02_OXRSH1	0.595225	129.164
217	02_OXRSH1	0.543685	117.98
217	02_OXRSH1	0.526186	114.182
217	02_OXRSH1	0.607391	131.804
217	02_OXRSH1	0.604297	131.132
217	02_OXRSH1	0.543788	118.002
217	02_OXRSH1	0.608006	131.937
217	02_OXRSH1	0.630036	136.718
217	02_OXRSH1	0.363267	78.8289
217	02_OXRSH1	0.430796	93.4828
217	02_OXRSH1	0.512181	111.143
217	02_OXRSH1	0.554828	120.398
217	02_OXRSH1	0.51491	111.736
217	02_OXRSH1	0.424167	92.0443
217	02_OXRSH1	0.604575	131.193
217	02_OXRSH1	0.598205	129.811
217	02_OXRSH1	0.581132	126.106
217	02_OXRSH1	0.560507	121.63
217	02_OXRSH1	0.610372	132.451
217	02_OXRSH1	0.48749	105.785
217	02_OXRSH1	0.430807	93.4851
217	02_OXRSH1	0.459158	99.6372
217	02_OXRSH1	0.637228	138.278
217	02_OXRSH1	0.608628	132.072
217	02_OXRSH1	0.577453	125.307
217	02_OXRSH1	0.525091	113.945
217	02_OXRSH1	0.570765	123.856
217	02_OXRSH1	0.520752	113.003
217	02_OXRSH1	0.455502	98.8439
217	02_OXRSH1	0.435154	94.4285
217	02_OXRSH1	0.57715	125.242
217	02_OXRSH1	0.591812	128.423
217	02_OXRSH1	0.464773	100.856
217	02_OXRSH1	0.612364	132.883
217	02_OXRSH1	0.504146	109.4
217	02_OXRSH1	0.547857	118.885
217	02_OXRSH1	0.515989	111.97
217	02_OXRSH1	0.482836	104.776
217	02_OXRSH1	0.617909	134.086
217	02_OXRSH1	0.555996	120.651
217	02_OXRSH1	0.544023	118.053
217	02_OXRSH1	0.574757	124.722
217	02_OXRSH1	0.472528	102.539
217	02_OXRSH1	0.639581	138.789
217	02_OXRSH1	0.637733	138.388
217	02_OXRSH1	0.623756	135.355
217	02_OXRSH1	0.541348	117.472
217	02_OXRSH1	0.440736	95.6398
217	02_OXRSH1	0.606138	131.532
217	02_OXRSH1	0.474492	102.965
217	02_OXRSH1	0.521167	113.093
217	02_OXRSH1	0.508317	110.305
217	02_OXRSH1	0.536857	116.498
217	02_OXRSH1	0.562067	121.969
217	02_OXRSH1	0.600029	130.206
217	02_OXRSH1	0.607004	131.72
217	02_OXRSH1	0.622894	135.168
217	02_OXRSH1	0.613475	133.124
217	02_OXRSH1	0.530624	115.145
217	02_OXRSH1	0.517252	112.244
217	02_OXRSH1	0.592487	128.57
217	02_OXRSH1	0.614045	133.248
217	02_OXRSH1	0.611137	132.617
217	02_OXRSH1	0.632317	137.213
217	02_OXRSH1	0.634916	137.777
217	02_OXRSH1	0.627228	136.109
217	02_OXRSH1	0.63477	137.745
217	02_OXRSH1	0.625575	135.75
217	02_OXRSH1	0.542836	117.795
217	02_OXRSH1	0.516159	112.007
217	02_OXRSH1	0.507452	110.117
217	02_OXRSH1	0.526087	114.161
217	02_OXRSH1	0.601119	130.443
217	02_OXRSH1	0.523068	113.506
217	02_OXRSH1	0.629926	136.694
217	02_OXRSH1	0.629673	136.639
217	02_OXRSH1	0.51563	111.892
217	02_OXRSH1	0.476914	103.49
217	02_OXRSH1	0.533156	115.695
217	02_OXRSH1	0.414994	90.0538
217	02_OXRSH1	0.416128	90.2998
217	02_OXRSH1	0.408289	88.5986
217	02_OXRSH1	0.547438	118.794
217	02_OXRSH1	0.609111	132.177
217	02_OXRSH1	0.62008	134.557
217	02_OXRSH1	0.595942	129.319
217	02_OXRSH1	0.646515	140.294
217	02_OXRSH1	0.555267	120.493
217	02_OXRSH1	0.625571	135.749
217	02_OXRSH1	0.640301	138.945
217	02_OXRSH1	0.533472	115.763
217	02_OXRSH1	0.561611	121.87
217	02_OXRSH1	0.606727	131.66
217	02_OXRSH1	0.489339	106.187
217	02_OXRSH1	0.544329	118.119
217	02_OXRSH1	0.640198	138.923
217	02_OXRSH1	0.549463	119.234
217	02_OXRSH1	0.650358	141.128
217	02_OXRSH1	0.54876	119.081
217	02_OXRSH1	0.634217	137.625
217	02_OXRSH1	0.604439	131.163
217	02_OXRSH1	0.58744	127.475
217	02_OXRSH1	0.652975	141.696
217	02_OXRSH1	0.513016	111.325
217	02_OXRSH1	0.529636	114.931
217	02_OXRSH1	0.636507	138.122
217	02_OXRSH1	0.477585	103.636
217	02_OXRSH1	0.73751	160.04
325	02_OXRSH1	0.570843	185.524
325	02_OXRSH1	0.54564	177.333
325	02_OXRSH1	0.42295	137.459
325	02_OXRSH1	0.560027	182.009
325	02_OXRSH1	0.449219	145.996
325	02_OXRSH1	0.499076	162.2
325	02_OXRSH1	0.478098	155.382
325	02_OXRSH1	0.527668	171.492
325	02_OXRSH1	0.462598	150.344
325	02_OXRSH1	0.427513	138.942
325	02_OXRSH1	0.545784	177.38
325	02_OXRSH1	0.541691	176.05
325	02_OXRSH1	0.460807	149.762
325	02_OXRSH1	0.539555	175.355
325	02_OXRSH1	0.56485	183.576
325	02_OXRSH1	0.279333	90.7831
325	02_OXRSH1	0.344629	112.004
325	02_OXRSH1	0.409208	132.993
325	02_OXRSH1	0.502616	163.35
325	02_OXRSH1	0.409655	133.138
325	02_OXRSH1	0.366396	119.079
325	02_OXRSH1	0.534409	173.683
325	02_OXRSH1	0.521797	169.584
325	02_OXRSH1	0.498795	162.108
325	02_OXRSH1	0.456823	148.468
325	02_OXRSH1	0.540878	175.785
325	02_OXRSH1	0.398097	129.382
325	02_OXRSH1	0.340759	110.747
325	02_OXRSH1	0.374742	121.791
325	02_OXRSH1	0.546821	177.717
325	02_OXRSH1	0.550535	178.924
325	02_OXRSH1	0.477502	155.188
325	02_OXRSH1	0.45779	148.782
325	02_OXRSH1	0.503246	163.555
325	02_OXRSH1	0.450265	146.336
325	02_OXRSH1	0.376686	122.423
325	02_OXRSH1	0.333138	108.27
325	02_OXRSH1	0.500537	162.675
325	02_OXRSH1	0.516135	167.744
325	02_OXRSH1	0.351908	114.37
325	02_OXRSH1	0.554064	180.071
325	02_OXRSH1	0.454046	147.565
325	02_OXRSH1	0.441855	143.603
325	02_OXRSH1	0.424132	137.843
325	02_OXRSH1	0.39137	127.195
325	02_OXRSH1	0.541858	176.104
325	02_OXRSH1	0.483269	157.062
325	02_OXRSH1	0.466759	151.697
325	02_OXRSH1	0.492654	160.113
325	02_OXRSH1	0.362302	117.748
325	02_OXRSH1	0.570169	185.305
325	02_OXRSH1	0.568219	184.671
325	02_OXRSH1	0.552718	179.633
325	02_OXRSH1	0.441321	143.429
325	02_OXRSH1	0.34375	111.719
325	02_OXRSH1	0.511085	166.103
325	02_OXRSH1	0.383124	124.515
325	02_OXRSH1	0.445906	144.92
325	02_OXRSH1	0.423639	137.683
325	02_OXRSH1	0.450498	146.412
325	02_OXRSH1	0.455612	148.074
325	02_OXRSH1	0.514441	167.193
325	02_OXRSH1	0.532838	173.172
325	02_OXRSH1	0.553703	179.954
325	02_OXRSH1	0.541195	175.888
325	02_OXRSH1	0.428668	139.317
325	02_OXRSH1	0.427263	138.861
325	02_OXRSH1	0.498452	161.997
325	02_OXRSH1	0.525881	170.911
325	02_OXRSH1	0.53361	173.423
325	02_OXRSH1	0.558306	181.449
325	02_OXRSH1	0.566652	184.162
325	02_OXRSH1	0.553664	179.941
325	02_OXRSH1	0.533928	173.526
325	02_OXRSH1	0.504935	164.104
325	02_OXRSH1	0.421409	136.958
325	02_OXRSH1	0.381258	123.909
325	02_OXRSH1	0.393575	127.912
325	02_OXRSH1	0.424867	138.082
325	02_OXRSH1	0.479009	155.678
325	02_OXRSH1	0.441182	143.384
325	02_OXRSH1	0.562076	182.675
325	02_OXRSH1	0.560429	182.139
325	02_OXRSH1	0.431832	140.345
325	02_OXRSH1	0.353584	114.915
325	02_OXRSH1	0.477352	155.139
325	02_OXRSH1	0.327787	106.531
325	02_OXRSH1	0.291746	94.8174
325	02_OXRSH1	0.329595	107.118
325	02_OXRSH1	0.462485	150.308
325	02_OXRSH1	0.543481	176.631
325	02_OXRSH1	0.557319	181.129
325	02_OXRSH1	0.504505	163.964
325	02_OXRSH1	0.578597	188.044
325	02_OXRSH1	0.463337	150.584
325	02_OXRSH1	0.556509	180.866
325	02_OXRSH1	0.579299	188.272
325	02_OXRSH1	0.442805	143.912
325	02_OXRSH1	0.489668	159.142
325	02_OXRSH1	0.455046	147.89
325	02_OXRSH1	0.40977	133.175
325	02_OXRSH1	0.434547	141.228
325	02_OXRSH1	0.573416	186.36
325	02_OXRSH1	0.455769	148.125
325	02_OXRSH1	0.587935	191.079
325	02_OXRSH1	0.486765	158.199
325	02_OXRSH1	0.563037	182.987
325	02_OXRSH1	0.503475	163.629
325	02_OXRSH1	0.505903	164.419
325	02_OXRSH1	0.574363	186.668
325	02_OXRSH1	0.395453	128.522
325	02_OXRSH1	0.413051	134.242
325	02_OXRSH1	0.559812	181.939
325	02_OXRSH1	0.399447	129.82
325	02_OXRSH1	0.638723	207.585
480	02_OXRSH1	0.465601	223.488
480	02_OXRSH1	0.457148	219.431
480	02_OXRSH1	0.31874	152.995
480	02_OXRSH1	0.467318	224.313
480	02_OXRSH1	0.357642	171.668
480	02_OXRSH1	0.413434	198.448
480	02_OXRSH1	0.379791	182.3
480	02_OXRSH1	0.432193	207.453
480	02_OXRSH1	0.362858	174.172
480	02_OXRSH1	0.298448	143.255
480	02_OXRSH1	0.465547	223.463
480	02_OXRSH1	0.451789	216.859
480	02_OXRSH1	0.350255	168.122
480	02_OXRSH1	0.446624	214.38
480	02_OXRSH1	0.474784	227.896
480	02_OXRSH1	0.201102	96.5288
480	02_OXRSH1	0.255759	122.764
480	02_OXRSH1	0.311957	149.739
480	02_OXRSH1	0.378193	181.533
480	02_OXRSH1	0.340377	163.381
480	02_OXRSH1	0.254292	122.06
480	02_OXRSH1	0.458014	219.847
480	02_OXRSH1	0.425152	204.073
480	02_OXRSH1	0.39123	187.79
480	02_OXRSH1	0.371431	178.287
480	02_OXRSH1	0.480488	230.634
480	02_OXRSH1	0.296015	142.087
480	02_OXRSH1	0.247602	118.849
480	02_OXRSH1	0.28328	135.974
480	02_OXRSH1	0.469849	225.527
480	02_OXRSH1	0.464933	223.168
480	02_OXRSH1	0.36844	176.851
480	02_OXRSH1	0.265403	127.393
480	02_OXRSH1	0.413993	198.717
480	02_OXRSH1	0.345131	165.663
480	02_OXRSH1	0.27414	131.587
480	02_OXRSH1	0.248901	119.473
480	02_OXRSH1	0.403525	193.692
480	02_OXRSH1	0.433747	208.199
480	02_OXRSH1	0.249941	119.972
480	02_OXRSH1	0.464456	222.939
480	02_OXRSH1	0.340884	163.624
480	02_OXRSH1	0.341474	163.908
480	02_OXRSH1	0.302797	145.342
480	02_OXRSH1	0.300154	144.074
480	02_OXRSH1	0.447355	214.73
480	02_OXRSH1	0.383951	184.297
480	02_OXRSH1	0.368002	176.641
480	02_OXRSH1	0.402883	193.384
480	02_OXRSH1	0.283571	136.114
480	02_OXRSH1	0.489041	234.74
480	02_OXRSH1	0.478267	229.568
480	02_OXRSH1	0.462207	221.859
480	02_OXRSH1	0.372343	178.725
480	02_OXRSH1	0.274353	131.69
480	02_OXRSH1	0.385771	185.17
480	02_OXRSH1	0.293302	140.785
480	02_OXRSH1	0.350596	168.286
480	02_OXRSH1	0.306989	147.355
480	02_OXRSH1	0.342314	164.311
480	02_OXRSH1	0.354321	170.074
480	02_OXRSH1	0.434948	208.775
480	02_OXRSH1	0.439175	210.804
480	02_OXRSH1	0.470791	225.98
480	02_OXRSH1	0.458809	220.228
480	02_OXRSH1	0.298028	143.054
480	02_OXRSH1	0.319637	153.426
480	02_OXRSH1	0.397027	190.573
480	02_OXRSH1	0.428955	205.898
480	02_OXRSH1	0.458878	220.261
480	02_OXRSH1	0.478106	229.491
480	02_OXRSH1	0.469892	225.548
480	02_OXRSH1	0.476135	228.545
480	02_OXRSH1	0.39162	187.977
480	02_OXRSH1	0.453628	217.742
480	02_OXRSH1	0.318278	152.773
480	02_OXRSH1	0.307939	147.811
480	02_OXRSH1	0.283457	136.059
480	02_OXRSH1	0.307587	147.642
480	02_OXRSH1	0.39193	188.126
480	02_OXRSH1	0.336438	161.49
480	02_OXRSH1	0.469661	225.437
480	02_OXRSH1	0.483891	232.268
480	02_OXRSH1	0.335292	160.94
480	02_OXRSH1	0.267317	128.312
480	02_OXRSH1	0.379313	182.07
480	02_OXRSH1	0.23757	114.034
480	02_OXRSH1	0.257769	123.729
480	02_OXRSH1	0.229934	110.368
480	02_OXRSH1	0.372443	178.773
480	02_OXRSH1	0.462071	221.794
480	02_OXRSH1	0.46812	224.698
480	02_OXRSH1	0.384747	184.678
480	02_OXRSH1	0.488939	234.691
480	02_OXRSH1	0.341489	163.915
480	02_OXRSH1	0.466323	223.835
480	02_OXRSH1	0.474717	227.864
480	02_OXRSH1	0.34032	163.354
480	02_OXRSH1	0.389346	186.886
480	02_OXRSH1	0.370087	177.642
480	02_OXRSH1	0.311762	149.646
480	02_OXRSH1	0.327469	157.185
480	02_OXRSH1	0.495393	237.788
480	02_OXRSH1	0.349449	167.735
480	02_OXRSH1	0.510502	245.041
480	02_OXRSH1	0.394701	189.456
480	02_OXRSH1	0.468861	225.053
480	02_OXRSH1	0.402376	193.14
480	02_OXRSH1	0.413899	198.672
480	02_OXRSH1	0.441898	212.111
480	02_OXRSH1	0.309479	148.55
480	02_OXRSH1	0.342355	164.33
480	02_OXRSH1	0.463961	222.701
480	02_OXRSH1	0.343948	165.095
480	02_OXRSH1	0.582001	279.36
665	02_OXRSH1	0.391879	260.6
665	02_OXRSH1	0.38348	255.014
665	02_OXRSH1	0.239703	159.403
665	02_OXRSH1	0.40913	272.071
665	02_OXRSH1	0.273217	181.689
665	02_OXRSH1	0.333165	221.555
665	02_OXRSH1	0.308006	204.824
665	02_OXRSH1	0.333266	221.622
665	02_OXRSH1	0.292145	194.277
665	02_OXRSH1	0.234919	156.221
665	02_OXRSH1	0.39901	265.342
665	02_OXRSH1	0.360771	239.912
665	02_OXRSH1	0.286661	190.629
665	02_OXRSH1	0.367693	244.516
665	02_OXRSH1	0.391419	260.294
665	02_OXRSH1	0.15643	104.026
665	02_OXRSH1	0.195761	130.181
665	02_OXRSH1	0.229115	152.362
665	02_OXRSH1	0.316868	210.717
665	02_OXRSH1	0.21209	141.04
665	02_OXRSH1	0.166648	110.821
665	02_OXRSH1	0.370221	246.197
665	02_OXRSH1	0.325768	216.636
665	02_OXRSH1	0.276979	184.191
665	02_OXRSH1	0.297543	197.866
665	02_OXRSH1	0.384233	255.515
665	02_OXRSH1	0.177228	117.857
665	02_OXRSH1	0.182061	121.071
665	02_OXRSH1	0.248545	165.282
665	02_OXRSH1	0.391945	260.643
665	02_OXRSH1	0.391729	260.5
665	02_OXRSH1	0.221396	147.229
665	02_OXRSH1	0.233906	155.548
665	02_OXRSH1	0.317529	211.157
665	02_OXRSH1	0.237797	158.135
665	02_OXRSH1	0.192531	128.033
665	02_OXRSH1	0.168341	111.946
665	02_OXRSH1	0.329003	218.787
665	02_OXRSH1	0.328713	218.594
665	02_OXRSH1	0.172149	114.479
665	02_OXRSH1	0.392173	260.795
665	02_OXRSH1	0.260863	173.474
665	02_OXRSH1	0.262304	174.432
665	02_OXRSH1	0.292574	194.561
665	02_OXRSH1	0.204023	135.675
665	02_OXRSH1	0.366171	243.504
665	02_OXRSH1	0.292995	194.841
665	02_OXRSH1	0.276081	183.594
665	02_OXRSH1	0.280693	186.661
665	02_OXRSH1	0.203575	135.377
665	02_OXRSH1	0.412656	274.416
665	02_OXRSH1	0.38929	258.878
665	02_OXRSH1	0.377821	251.251
665	02_OXRSH1	0.236008	156.946
665	02_OXRSH1	0.200822	133.546
665	02_OXRSH1	0.300778	200.017
665	02_OXRSH1	0.2523	167.78
665	02_OXRSH1	0.251478	167.233
665	02_OXRSH1	0.215639	143.4
665	02_OXRSH1	0.246156	163.694
665	02_OXRSH1	0.280602	186.6
665	02_OXRSH1	0.337808	224.642
665	02_OXRSH1	0.367731	244.541
665	02_OXRSH1	0.380331	252.92
665	02_OXRSH1	0.38947	258.997
665	02_OXRSH1	0.227363	151.196
665	02_OXRSH1	0.255486	169.898
665	02_OXRSH1	0.318923	212.084
665	02_OXRSH1	0.347212	230.896
665	02_OXRSH1	0.364421	242.34
665	02_OXRSH1	0.407054	270.691
665	02_OXRSH1	0.390697	259.813
665	02_OXRSH1	0.403198	268.127
665	02_OXRSH1	0.272491	181.206
665	02_OXRSH1	0.357941	238.031
665	02_OXRSH1	0.234209	155.749
665	02_OXRSH1	0.236306	157.143
665	02_OXRSH1	0.216012	143.648
665	02_OXRSH1	0.232064	154.323
665	02_OXRSH1	0.318493	211.798
665	02_OXRSH1	0.262294	174.426
665	02_OXRSH1	0.367042	244.083
665	02_OXRSH1	0.399083	265.39
665	02_OXRSH1	0.252521	167.926
665	02_OXRSH1	0.204626	136.076
665	02_OXRSH1	0.284475	189.176
665	02_OXRSH1	0.18283	121.582
665	02_OXRSH1	0.201954	134.299
665	02_OXRSH1	0.20788	138.24
665	02_OXRSH1	0.282823	188.077
665	02_OXRSH1	0.382966	254.672
665	02_OXRSH1	0.386614	257.098
665	02_OXRSH1	0.276104	183.609
665	02_OXRSH1	0.398156	264.774
665	02_OXRSH1	0.28352	188.541
665	02_OXRSH1	0.397822	264.552
665	02_OXRSH1	0.412511	274.32
665	02_OXRSH1	0.257254	171.074
665	02_OXRSH1	0.305917	203.435
665	02_OXRSH1	0.265901	176.824
665	02_OXRSH1	0.250495	166.579
665	02_OXRSH1	0.262134	174.319
665	02_OXRSH1	0.407787	271.178
665	02_OXRSH1	0.253614	168.653
665	02_OXRSH1	0.40795	271.287
665	02_OXRSH1	0.373844	248.606
665	02_OXRSH1	0.353589	235.137
665	02_OXRSH1	0.30873	205.305
665	02_OXRSH1	0.327156	217.559
665	02_OXRSH1	0.317307	211.009
665	02_OXRSH1	0.201018	133.677
665	02_OXRSH1	0.286055	190.227
665	02_OXRSH1	0.351055	233.452
665	02_OXRSH1	0.232408	154.552
665	02_OXRSH1	0.515081	342.529
866	02_OXRSH1	0.32112	278.09
866	02_OXRSH1	0.319614	276.786
866	02_OXRSH1	0.213899	185.237
866	02_OXRSH1	0.333084	288.451
866	02_OXRSH1	0.23535	203.813
866	02_OXRSH1	0.270902	234.601
866	02_OXRSH1	0.240685	208.433
866	02_OXRSH1	0.270724	234.447
866	02_OXRSH1	0.241487	209.127
866	02_OXRSH1	0.1852	160.383
866	02_OXRSH1	0.330751	286.43
866	02_OXRSH1	0.292594	253.387
866	02_OXRSH1	0.21161	183.254
866	02_OXRSH1	0.276045	239.055
866	02_OXRSH1	0.328799	284.74
866	02_OXRSH1	0.12156	105.271
866	02_OXRSH1	0.133227	115.374
866	02_OXRSH1	0.1881	162.895
866	02_OXRSH1	0.264346	228.923
866	02_OXRSH1	0.2018	174.759
866	02_OXRSH1	0.139396	120.717
866	02_OXRSH1	0.308392	267.068
866	02_OXRSH1	0.244787	211.985
866	02_OXRSH1	0.216834	187.778
866	02_OXRSH1	0.249831	216.354
866	02_OXRSH1	0.334564	289.733
866	02_OXRSH1	0.168366	145.805
866	02_OXRSH1	0.131869	114.198
866	02_OXRSH1	0.163079	141.227
866	02_OXRSH1	0.297311	257.472
866	02_OXRSH1	0.305761	264.789
866	02_OXRSH1	0.119485	103.474
866	02_OXRSH1	0.220679	191.108
866	02_OXRSH1	0.261636	226.577
866	02_OXRSH1	0.221409	191.74
866	02_OXRSH1	0.165845	143.621
866	02_OXRSH1	0.161371	139.747
866	02_OXRSH1	0.278157	240.884
866	02_OXRSH1	0.287312	248.812
866	02_OXRSH1	0.156449	135.485
866	02_OXRSH1	0.335777	290.783
866	02_OXRSH1	0.238029	206.133
866	02_OXRSH1	0.185054	160.256
866	02_OXRSH1	0.220405	190.871
866	02_OXRSH1	0.177585	153.788
866	02_OXRSH1	0.269583	233.459
866	02_OXRSH1	0.225774	195.521
866	02_OXRSH1	0.238279	206.349
866	02_OXRSH1	0.234722	203.269
866	02_OXRSH1	0.182833	158.333
866	02_OXRSH1	0.338429	293.08
866	02_OXRSH1	0.326759	282.973
866	02_OXRSH1	0.310388	268.796
866	02_OXRSH1	0.224095	194.066
866	02_OXRSH1	0.125374	108.574
866	02_OXRSH1	0.257898	223.339
866	02_OXRSH1	0.16191	140.214
866	02_OXRSH1	0.20091	173.988
866	02_OXRSH1	0.190867	165.291
866	02_OXRSH1	0.183442	158.86
866	02_OXRSH1	0.230502	199.615
866	02_OXRSH1	0.273888	237.187
866	02_OXRSH1	0.277582	240.386
866	02_OXRSH1	0.314395	272.266
866	02_OXRSH1	0.313228	271.256
866	02_OXRSH1	0.174723	151.31
866	02_OXRSH1	0.210609	182.387
866	02_OXRSH1	0.24773	214.534
866	02_OXRSH1	0.277753	240.534
866	02_OXRSH1	0.295703	256.079
866	02_OXRSH1	0.316244	273.867
866	02_OXRSH1	0.315387	273.125
866	02_OXRSH1	0.344932	298.711
866	02_OXRSH1	0.277501	240.316
866	02_OXRSH1	0.310999	269.325
866	02_OXRSH1	0.200232	173.401
866	02_OXRSH1	0.173913	150.609
866	02_OXRSH1	0.182566	158.102
866	02_OXRSH1	0.1795	155.447
866	02_OXRSH1	0.274159	237.421
866	02_OXRSH1	0.19816	171.606
866	02_OXRSH1	0.27454	237.752
866	02_OXRSH1	0.320965	277.956
866	02_OXRSH1	0.21289	184.363
866	02_OXRSH1	0.143875	124.596
866	02_OXRSH1	0.168048	145.53
866	02_OXRSH1	0.103864	89.9459
866	02_OXRSH1	0.143761	124.497
866	02_OXRSH1	0.148148	128.296
866	02_OXRSH1	0.235815	204.216
866	02_OXRSH1	0.319547	276.728
866	02_OXRSH1	0.299409	259.288
866	02_OXRSH1	0.224863	194.731
866	02_OXRSH1	0.31706	274.574
866	02_OXRSH1	0.262124	226.999
866	02_OXRSH1	0.329062	284.967
866	02_OXRSH1	0.299988	259.789
866	02_OXRSH1	0.198053	171.514
866	02_OXRSH1	0.247877	214.662
866	02_OXRSH1	0.243432	210.812
866	02_OXRSH1	0.189001	163.675
866	02_OXRSH1	0.219619	190.19
866	02_OXRSH1	0.339025	293.596
866	02_OXRSH1	0.227211	196.765
866	02_OXRSH1	0.363221	314.55
866	02_OXRSH1	0.304287	263.512
866	02_OXRSH1	0.297296	257.458
866	02_OXRSH1	0.274843	238.014
866	02_OXRSH1	0.265695	230.092
866	02_OXRSH1	0.267658	231.792
866	02_OXRSH1	0.237066	205.3
866	02_OXRSH1	0.197986	171.456
866	02_OXRSH1	0.288737	250.046
866	02_OXRSH1	0.18396	159.309
866	02_OXRSH1	0.448796	388.658
1098	02_OXRSH1	0.262198	287.893
1098	02_OXRSH1	0.243485	267.347
1098	02_OXRSH1	0.158258	173.767
1098	02_OXRSH1	0.287238	315.387
1098	02_OXRSH1	0.171423	188.222
1098	02_OXRSH1	0.213823	234.778
1098	02_OXRSH1	0.193972	212.981
1098	02_OXRSH1	0.198369	217.809
1098	02_OXRSH1	0.144701	158.881
1098	02_OXRSH1	0.124409	136.601
1098	02_OXRSH1	0.256372	281.496
1098	02_OXRSH1	0.229086	251.537
1098	02_OXRSH1	0.159723	175.376
1098	02_OXRSH1	0.213855	234.813
1098	02_OXRSH1	0.267129	293.308
1098	02_OXRSH1	0.113552	124.68
1098	02_OXRSH1	0.133713	146.817
1098	02_OXRSH1	0.122076	134.039
1098	02_OXRSH1	0.216154	237.337
1098	02_OXRSH1	0.151036	165.838
1098	02_OXRSH1	0.174193	191.264
1098	02_OXRSH1	0.241289	264.935
1098	02_OXRSH1	0.205734	225.896
1098	02_OXRSH1	0.196877	216.171
1098	02_OXRSH1	0.211933	232.702
1098	02_OXRSH1	0.255946	281.028
1098	02_OXRSH1	0.138727	152.323
1098	02_OXRSH1	0.10754	118.079
1098	02_OXRSH1	0.125622	137.933
1098	02_OXRSH1	0.228201	250.564
1098	02_OXRSH1	0.268869	295.218
1098	02_OXRSH1	0.199135	218.65
1098	02_OXRSH1	0.155778	171.045
1098	02_OXRSH1	0.17644	193.731
1098	02_OXRSH1	0.181671	199.475
1098	02_OXRSH1	0.115639	126.971
1098	02_OXRSH1	0.101354	111.287
1098	02_OXRSH1	0.219349	240.845
1098	02_OXRSH1	0.227721	250.038
1098	02_OXRSH1	0.0785487	86.2465
1098	02_OXRSH1	0.249468	273.916
1098	02_OXRSH1	0.191896	210.702
1098	02_OXRSH1	0.154631	169.785
1098	02_OXRSH1	0.172057	188.918
1098	02_OXRSH1	0.139885	153.593
1098	02_OXRSH1	0.228799	251.222
1098	02_OXRSH1	0.19605	215.263
1098	02_OXRSH1	0.167279	183.672
1098	02_OXRSH1	0.200393	220.032
1098	02_OXRSH1	0.111735	122.685
1098	02_OXRSH1	0.26238	288.093
1098	02_OXRSH1	0.256686	281.841
1098	02_OXRSH1	0.246693	270.869
1098	02_OXRSH1	0.0943665	103.614
1098	02_OXRSH1	0.152993	167.986
1098	02_OXRSH1	0.188222	206.668
1098	02_OXRSH1	0.177632	195.039
1098	02_OXRSH1	0.170663	187.388
1098	02_OXRSH1	0.192101	210.927
1098	02_OXRSH1	0.16043	176.152
1098	02_OXRSH1	0.19993	219.523
1098	02_OXRSH1	0.25463	279.584
[truncated: 53 more rows]
