# Supplementary material for: A guanosine tetraphosphate (ppGpp) mediated brake on photosynthesis is required for acclimation to nitrogen limitation in Arabidopsis
Source: eLife journal article supplement (doi:10.7554/elife.75041), 2022-02-14
Supplement: fig2-data1 [file Fig_2_supp_2B_data.xlsx]

## Sheet: Sheet 1
Light	Line	Treatment	QY	ETR
27	MS_MESH_0	N	0.67	18.09
27	MS_MESH_0	N	0.64	17.28
27	MS_MESH_0	N	0.66	17.82
27	MS_MESH_0	N	0.7	18.9
27	MS_MESH_0	N	0.68	18.36
27	MS_MESH_0	N	0.66	17.82
27	MS_MESH_0	N	0.64	17.28
27	MS_MESH_0	N	0.63	17.01
27	MS_MESH_0	N	0.66	17.82
27	MS_MESH_0	N	0.65	17.55
27	MS_MESH_0	N	0.68	18.36
27	MS_MESH_0	N	0.64	17.28
27	MS_MESH_0	N	0.65	17.55
27	MS_MESH_0	N	0.65	17.55
27	MS_MESH_0	N	0.66	17.82
27	MS_MESH_0	N	0.65	17.55
27	MS_MESH_0	N	0.64	17.28
27	MS_MESH_0	N	0.68	18.36
27	MS_MESH_0	N	0.64	17.28
27	MS_MESH_0	N	0.65	17.55
27	MS_MESH_0	N	0.68	18.36
27	MS_MESH_0	N	0.63	17.01
27	MS_MESH_0	N	0.63	17.01
27	MS_MESH_0	N	0.7	18.9
27	MS_MESH_0	N	0.65	17.55
27	MS_MESH_0	N	0.66	17.82
27	MS_MESH_0	N	0.7	18.9
27	MS_MESH_0	N	0.67	18.09
27	MS_MESH_0	N	0.72	19.44
27	MS_MESH_0	N	0.65	17.55
27	MS_MESH_0	N	0.66	17.82
65	MS_MESH_0	N	0.67	43.55
65	MS_MESH_0	N	0.64	41.6
65	MS_MESH_0	N	0.66	42.9
65	MS_MESH_0	N	0.69	44.85
65	MS_MESH_0	N	0.68	44.2
65	MS_MESH_0	N	0.67	43.55
65	MS_MESH_0	N	0.65	42.25
65	MS_MESH_0	N	0.63	40.95
65	MS_MESH_0	N	0.66	42.9
65	MS_MESH_0	N	0.64	41.6
65	MS_MESH_0	N	0.67	43.55
65	MS_MESH_0	N	0.64	41.6
65	MS_MESH_0	N	0.64	41.6
65	MS_MESH_0	N	0.65	42.25
65	MS_MESH_0	N	0.66	42.9
65	MS_MESH_0	N	0.64	41.6
65	MS_MESH_0	N	0.64	41.6
65	MS_MESH_0	N	0.67	43.55
65	MS_MESH_0	N	0.63	40.95
65	MS_MESH_0	N	0.65	42.25
65	MS_MESH_0	N	0.67	43.55
65	MS_MESH_0	N	0.63	40.95
65	MS_MESH_0	N	0.63	40.95
65	MS_MESH_0	N	0.69	44.85
65	MS_MESH_0	N	0.65	42.25
65	MS_MESH_0	N	0.65	42.25
65	MS_MESH_0	N	0.7	45.5
65	MS_MESH_0	N	0.66	42.9
65	MS_MESH_0	N	0.7	45.5
65	MS_MESH_0	N	0.65	42.25
65	MS_MESH_0	N	0.65	42.25
124	MS_MESH_0	N	0.63	78.12
124	MS_MESH_0	N	0.61	75.64
124	MS_MESH_0	N	0.63	78.12
124	MS_MESH_0	N	0.65	80.6
124	MS_MESH_0	N	0.64	79.36
124	MS_MESH_0	N	0.63	78.12
124	MS_MESH_0	N	0.62	76.88
124	MS_MESH_0	N	0.6	74.4
124	MS_MESH_0	N	0.63	78.12
124	MS_MESH_0	N	0.61	75.64
124	MS_MESH_0	N	0.64	79.36
124	MS_MESH_0	N	0.6	74.4
124	MS_MESH_0	N	0.6	74.4
124	MS_MESH_0	N	0.62	76.88
124	MS_MESH_0	N	0.62	76.88
124	MS_MESH_0	N	0.6	74.4
124	MS_MESH_0	N	0.61	75.64
124	MS_MESH_0	N	0.64	79.36
124	MS_MESH_0	N	0.6	74.4
124	MS_MESH_0	N	0.62	76.88
124	MS_MESH_0	N	0.62	76.88
124	MS_MESH_0	N	0.6	74.4
124	MS_MESH_0	N	0.6	74.4
124	MS_MESH_0	N	0.64	79.36
124	MS_MESH_0	N	0.61	75.64
124	MS_MESH_0	N	0.61	75.64
124	MS_MESH_0	N	0.66	81.84
124	MS_MESH_0	N	0.62	76.88
124	MS_MESH_0	N	0.64	79.36
124	MS_MESH_0	N	0.62	76.88
124	MS_MESH_0	N	0.61	75.64
217	MS_MESH_0	N	0.56	121.52
217	MS_MESH_0	N	0.56	121.52
217	MS_MESH_0	N	0.58	125.86
217	MS_MESH_0	N	0.58	125.86
217	MS_MESH_0	N	0.58	125.86
217	MS_MESH_0	N	0.57	123.69
217	MS_MESH_0	N	0.54	117.18
217	MS_MESH_0	N	0.53	115.01
217	MS_MESH_0	N	0.55	119.35
217	MS_MESH_0	N	0.55	119.35
217	MS_MESH_0	N	0.55	119.35
217	MS_MESH_0	N	0.52	112.84
217	MS_MESH_0	N	0.54	117.18
217	MS_MESH_0	N	0.56	121.52
217	MS_MESH_0	N	0.53	115.01
217	MS_MESH_0	N	0.55	119.35
217	MS_MESH_0	N	0.55	119.35
217	MS_MESH_0	N	0.56	121.52
217	MS_MESH_0	N	0.53	115.01
217	MS_MESH_0	N	0.55	119.35
217	MS_MESH_0	N	0.52	112.84
217	MS_MESH_0	N	0.54	117.18
217	MS_MESH_0	N	0.55	119.35
217	MS_MESH_0	N	0.57	123.69
217	MS_MESH_0	N	0.53	115.01
217	MS_MESH_0	N	0.54	117.18
217	MS_MESH_0	N	0.59	128.03
217	MS_MESH_0	N	0.56	121.52
217	MS_MESH_0	N	0.56	121.52
217	MS_MESH_0	N	0.56	121.52
217	MS_MESH_0	N	0.55	119.35
325	MS_MESH_0	N	0.45	146.25
325	MS_MESH_0	N	0.47	152.75
325	MS_MESH_0	N	0.5	162.5
325	MS_MESH_0	N	0.48	156
325	MS_MESH_0	N	0.5	162.5
325	MS_MESH_0	N	0.46	149.5
325	MS_MESH_0	N	0.43	139.75
325	MS_MESH_0	N	0.41	133.25
325	MS_MESH_0	N	0.43	139.75
325	MS_MESH_0	N	0.44	143
325	MS_MESH_0	N	0.45	146.25
325	MS_MESH_0	N	0.41	133.25
325	MS_MESH_0	N	0.44	143
325	MS_MESH_0	N	0.48	156
325	MS_MESH_0	N	0.42	136.5
325	MS_MESH_0	N	0.45	146.25
325	MS_MESH_0	N	0.45	146.25
325	MS_MESH_0	N	0.45	146.25
325	MS_MESH_0	N	0.41	133.25
325	MS_MESH_0	N	0.43	139.75
325	MS_MESH_0	N	0.41	133.25
325	MS_MESH_0	N	0.45	146.25
325	MS_MESH_0	N	0.44	143
325	MS_MESH_0	N	0.48	156
325	MS_MESH_0	N	0.41	133.25
325	MS_MESH_0	N	0.44	143
325	MS_MESH_0	N	0.5	162.5
325	MS_MESH_0	N	0.48	156
325	MS_MESH_0	N	0.47	152.75
325	MS_MESH_0	N	0.45	146.25
325	MS_MESH_0	N	0.45	146.25
480	MS_MESH_0	N	0.33	158.4
480	MS_MESH_0	N	0.36	172.8
480	MS_MESH_0	N	0.38	182.4
480	MS_MESH_0	N	0.37	177.6
480	MS_MESH_0	N	0.39	187.2
480	MS_MESH_0	N	0.34	163.2
480	MS_MESH_0	N	0.31	148.8
480	MS_MESH_0	N	0.29	139.2
480	MS_MESH_0	N	0.31	148.8
480	MS_MESH_0	N	0.31	148.8
480	MS_MESH_0	N	0.33	158.4
480	MS_MESH_0	N	0.3	144
480	MS_MESH_0	N	0.32	153.6
480	MS_MESH_0	N	0.36	172.8
480	MS_MESH_0	N	0.3	144
480	MS_MESH_0	N	0.32	153.6
480	MS_MESH_0	N	0.33	158.4
480	MS_MESH_0	N	0.32	153.6
480	MS_MESH_0	N	0.3	144
480	MS_MESH_0	N	0.3	144
480	MS_MESH_0	N	0.28	134.4
480	MS_MESH_0	N	0.34	163.2
480	MS_MESH_0	N	0.32	153.6
480	MS_MESH_0	N	0.38	182.4
480	MS_MESH_0	N	0.3	144
480	MS_MESH_0	N	0.33	158.4
480	MS_MESH_0	N	0.39	187.2
480	MS_MESH_0	N	0.38	182.4
480	MS_MESH_0	N	0.37	177.6
480	MS_MESH_0	N	0.34	163.2
480	MS_MESH_0	N	0.34	163.2
665	MS_MESH_0	N	0.25	166.25
665	MS_MESH_0	N	0.28	186.2
665	MS_MESH_0	N	0.3	199.5
665	MS_MESH_0	N	0.28	186.2
665	MS_MESH_0	N	0.31	206.15
665	MS_MESH_0	N	0.25	166.25
665	MS_MESH_0	N	0.22	146.3
665	MS_MESH_0	N	0.22	146.3
665	MS_MESH_0	N	0.24	159.6
665	MS_MESH_0	N	0.24	159.6
665	MS_MESH_0	N	0.24	159.6
665	MS_MESH_0	N	0.21	139.65
665	MS_MESH_0	N	0.24	159.6
665	MS_MESH_0	N	0.28	186.2
665	MS_MESH_0	N	0.23	152.95
665	MS_MESH_0	N	0.25	166.25
665	MS_MESH_0	N	0.25	166.25
665	MS_MESH_0	N	0.23	152.95
665	MS_MESH_0	N	0.23	152.95
665	MS_MESH_0	N	0.23	152.95
665	MS_MESH_0	N	0.23	152.95
665	MS_MESH_0	N	0.25	166.25
665	MS_MESH_0	N	0.24	159.6
665	MS_MESH_0	N	0.28	186.2
665	MS_MESH_0	N	0.22	146.3
665	MS_MESH_0	N	0.25	166.25
665	MS_MESH_0	N	0.3	199.5
665	MS_MESH_0	N	0.29	192.85
665	MS_MESH_0	N	0.3	199.5
665	MS_MESH_0	N	0.26	172.9
665	MS_MESH_0	N	0.25	166.25
866	MS_MESH_0	N	0.18	155.88
866	MS_MESH_0	N	0.22	190.52
866	MS_MESH_0	N	0.23	199.18
866	MS_MESH_0	N	0.21	181.86
866	MS_MESH_0	N	0.24	207.84
866	MS_MESH_0	N	0.2	173.2
866	MS_MESH_0	N	0.18	155.88
866	MS_MESH_0	N	0.17	147.22
866	MS_MESH_0	N	0.19	164.54
866	MS_MESH_0	N	0.19	164.54
866	MS_MESH_0	N	0.2	173.2
866	MS_MESH_0	N	0.18	155.88
866	MS_MESH_0	N	0.19	164.54
866	MS_MESH_0	N	0.23	199.18
866	MS_MESH_0	N	0.18	155.88
866	MS_MESH_0	N	0.19	164.54
866	MS_MESH_0	N	0.2	173.2
866	MS_MESH_0	N	0.19	164.54
866	MS_MESH_0	N	0.18	155.88
866	MS_MESH_0	N	0.18	155.88
866	MS_MESH_0	N	0.17	147.22
866	MS_MESH_0	N	0.21	181.86
866	MS_MESH_0	N	0.19	164.54
866	MS_MESH_0	N	0.22	190.52
866	MS_MESH_0	N	0.19	164.54
866	MS_MESH_0	N	0.2	173.2
866	MS_MESH_0	N	0.24	207.84
866	MS_MESH_0	N	0.23	199.18
866	MS_MESH_0	N	0.23	199.18
866	MS_MESH_0	N	0.2	173.2
866	MS_MESH_0	N	0.2	173.2
1098	MS_MESH_0	N	0.15	164.7
1098	MS_MESH_0	N	0.18	197.64
1098	MS_MESH_0	N	0.19	208.62
1098	MS_MESH_0	N	0.18	197.64
1098	MS_MESH_0	N	0.2	219.6
1098	MS_MESH_0	N	0.16	175.68
1098	MS_MESH_0	N	0.14	153.72
1098	MS_MESH_0	N	0.14	153.72
1098	MS_MESH_0	N	0.15	164.7
1098	MS_MESH_0	N	0.16	175.68
1098	MS_MESH_0	N	0.16	175.68
1098	MS_MESH_0	N	0.14	153.72
1098	MS_MESH_0	N	0.15	164.7
1098	MS_MESH_0	N	0.17	186.66
1098	MS_MESH_0	N	0.14	153.72
1098	MS_MESH_0	N	0.15	164.7
1098	MS_MESH_0	N	0.16	175.68
1098	MS_MESH_0	N	0.14	153.72
1098	MS_MESH_0	N	0.15	164.7
1098	MS_MESH_0	N	0.14	153.72
1098	MS_MESH_0	N	0.13	142.74
1098	MS_MESH_0	N	0.17	186.66
1098	MS_MESH_0	N	0.15	164.7
1098	MS_MESH_0	N	0.18	197.64
1098	MS_MESH_0	N	0.14	153.72
1098	MS_MESH_0	N	0.16	175.68
1098	MS_MESH_0	N	0.19	208.62
1098	MS_MESH_0	N	0.19	208.62
1098	MS_MESH_0	N	0.19	208.62
1098	MS_MESH_0	N	0.17	186.66
1098	MS_MESH_0	N	0.15	164.7
27	MS_MESH_0.1	N	0.69	18.63
27	MS_MESH_0.1	N	0.67	18.09
27	MS_MESH_0.1	N	0.66	17.82
27	MS_MESH_0.1	N	0.74	19.98
27	MS_MESH_0.1	N	0.64	17.28
27	MS_MESH_0.1	N	0.68	18.36
27	MS_MESH_0.1	N	0.64	17.28
27	MS_MESH_0.1	N	0.65	17.55
27	MS_MESH_0.1	N	0.59	15.93
27	MS_MESH_0.1	N	0.63	17.01
27	MS_MESH_0.1	N	0.66	17.82
27	MS_MESH_0.1	N	0.67	18.09
27	MS_MESH_0.1	N	0.65	17.55
27	MS_MESH_0.1	N	0.64	17.28
27	MS_MESH_0.1	N	0.65	17.55
27	MS_MESH_0.1	N	0.64	17.28
27	MS_MESH_0.1	N	0.62	16.74
27	MS_MESH_0.1	N	0.63	17.01
27	MS_MESH_0.1	N	0.64	17.28
27	MS_MESH_0.1	N	0.67	18.09
27	MS_MESH_0.1	N	0.62	16.74
27	MS_MESH_0.1	N	0.63	17.01
27	MS_MESH_0.1	N	0.66	17.82
27	MS_MESH_0.1	N	0.62	16.74
27	MS_MESH_0.1	N	0.66	17.82
27	MS_MESH_0.1	N	0.64	17.28
27	MS_MESH_0.1	N	0.64	17.28
27	MS_MESH_0.1	N	0.66	17.82
27	MS_MESH_0.1	N	0.7	18.9
27	MS_MESH_0.1	N	0.69	18.63
27	MS_MESH_0.1	N	0.67	18.09
27	MS_MESH_0.1	N	0.67	18.09
27	MS_MESH_0.1	N	0.68	18.36
27	MS_MESH_0.1	N	0.7	18.9
65	MS_MESH_0.1	N	0.68	44.2
65	MS_MESH_0.1	N	0.66	42.9
65	MS_MESH_0.1	N	0.67	43.55
65	MS_MESH_0.1	N	0.75	48.75
65	MS_MESH_0.1	N	0.64	41.6
65	MS_MESH_0.1	N	0.68	44.2
65	MS_MESH_0.1	N	0.64	41.6
65	MS_MESH_0.1	N	0.65	42.25
65	MS_MESH_0.1	N	0.59	38.35
65	MS_MESH_0.1	N	0.63	40.95
65	MS_MESH_0.1	N	0.65	42.25
65	MS_MESH_0.1	N	0.67	43.55
65	MS_MESH_0.1	N	0.64	41.6
65	MS_MESH_0.1	N	0.63	40.95
65	MS_MESH_0.1	N	0.64	41.6
65	MS_MESH_0.1	N	0.64	41.6
65	MS_MESH_0.1	N	0.63	40.95
65	MS_MESH_0.1	N	0.62	40.3
65	MS_MESH_0.1	N	0.64	41.6
65	MS_MESH_0.1	N	0.67	43.55
65	MS_MESH_0.1	N	0.62	40.3
65	MS_MESH_0.1	N	0.63	40.95
65	MS_MESH_0.1	N	0.66	42.9
65	MS_MESH_0.1	N	0.62	40.3
65	MS_MESH_0.1	N	0.64	41.6
65	MS_MESH_0.1	N	0.63	40.95
65	MS_MESH_0.1	N	0.63	40.95
65	MS_MESH_0.1	N	0.66	42.9
65	MS_MESH_0.1	N	0.7	45.5
65	MS_MESH_0.1	N	0.68	44.2
65	MS_MESH_0.1	N	0.67	43.55
65	MS_MESH_0.1	N	0.67	43.55
65	MS_MESH_0.1	N	0.68	44.2
65	MS_MESH_0.1	N	0.69	44.85
124	MS_MESH_0.1	N	0.64	79.36
124	MS_MESH_0.1	N	0.62	76.88
124	MS_MESH_0.1	N	0.64	79.36
124	MS_MESH_0.1	N	0.72	89.28
124	MS_MESH_0.1	N	0.61	75.64
124	MS_MESH_0.1	N	0.65	80.6
124	MS_MESH_0.1	N	0.61	75.64
124	MS_MESH_0.1	N	0.62	76.88
124	MS_MESH_0.1	N	0.55	68.2
124	MS_MESH_0.1	N	0.6	74.4
124	MS_MESH_0.1	N	0.62	76.88
124	MS_MESH_0.1	N	0.63	78.12
124	MS_MESH_0.1	N	0.59	73.16
124	MS_MESH_0.1	N	0.61	75.64
124	MS_MESH_0.1	N	0.61	75.64
124	MS_MESH_0.1	N	0.61	75.64
124	MS_MESH_0.1	N	0.61	75.64
124	MS_MESH_0.1	N	0.6	74.4
124	MS_MESH_0.1	N	0.61	75.64
124	MS_MESH_0.1	N	0.63	78.12
124	MS_MESH_0.1	N	0.59	73.16
124	MS_MESH_0.1	N	0.6	74.4
124	MS_MESH_0.1	N	0.63	78.12
124	MS_MESH_0.1	N	0.6	74.4
124	MS_MESH_0.1	N	0.6	74.4
124	MS_MESH_0.1	N	0.6	74.4
124	MS_MESH_0.1	N	0.59	73.16
124	MS_MESH_0.1	N	0.63	78.12
124	MS_MESH_0.1	N	0.65	80.6
124	MS_MESH_0.1	N	0.64	79.36
124	MS_MESH_0.1	N	0.64	79.36
124	MS_MESH_0.1	N	0.64	79.36
124	MS_MESH_0.1	N	0.65	80.6
124	MS_MESH_0.1	N	0.65	80.6
217	MS_MESH_0.1	N	0.55	119.35
217	MS_MESH_0.1	N	0.55	119.35
217	MS_MESH_0.1	N	0.57	123.69
217	MS_MESH_0.1	N	0.63	136.71
217	MS_MESH_0.1	N	0.54	117.18
217	MS_MESH_0.1	N	0.59	128.03
217	MS_MESH_0.1	N	0.56	121.52
217	MS_MESH_0.1	N	0.55	119.35
217	MS_MESH_0.1	N	0.47	101.99
217	MS_MESH_0.1	N	0.54	117.18
217	MS_MESH_0.1	N	0.56	121.52
217	MS_MESH_0.1	N	0.58	125.86
217	MS_MESH_0.1	N	0.5	108.5
217	MS_MESH_0.1	N	0.54	117.18
217	MS_MESH_0.1	N	0.55	119.35
217	MS_MESH_0.1	N	0.56	121.52
217	MS_MESH_0.1	N	0.54	117.18
217	MS_MESH_0.1	N	0.53	115.01
217	MS_MESH_0.1	N	0.55	119.35
217	MS_MESH_0.1	N	0.56	121.52
217	MS_MESH_0.1	N	0.55	119.35
217	MS_MESH_0.1	N	0.53	115.01
217	MS_MESH_0.1	N	0.57	123.69
217	MS_MESH_0.1	N	0.54	117.18
217	MS_MESH_0.1	N	0.53	115.01
217	MS_MESH_0.1	N	0.53	115.01
217	MS_MESH_0.1	N	0.52	112.84
217	MS_MESH_0.1	N	0.56	121.52
217	MS_MESH_0.1	N	0.58	125.86
217	MS_MESH_0.1	N	0.57	123.69
217	MS_MESH_0.1	N	0.57	123.69
217	MS_MESH_0.1	N	0.58	125.86
217	MS_MESH_0.1	N	0.57	123.69
217	MS_MESH_0.1	N	0.57	123.69
325	MS_MESH_0.1	N	0.45	146.25
325	MS_MESH_0.1	N	0.46	149.5
325	MS_MESH_0.1	N	0.47	152.75
325	MS_MESH_0.1	N	0.56	182
325	MS_MESH_0.1	N	0.43	139.75
325	MS_MESH_0.1	N	0.51	165.75
325	MS_MESH_0.1	N	0.45	146.25
325	MS_MESH_0.1	N	0.44	143
325	MS_MESH_0.1	N	0.34	110.5
325	MS_MESH_0.1	N	0.42	136.5
325	MS_MESH_0.1	N	0.47	152.75
325	MS_MESH_0.1	N	0.48	156
325	MS_MESH_0.1	N	0.38	123.5
325	MS_MESH_0.1	N	0.42	136.5
325	MS_MESH_0.1	N	0.44	143
325	MS_MESH_0.1	N	0.47	152.75
325	MS_MESH_0.1	N	0.42	136.5
325	MS_MESH_0.1	N	0.41	133.25
325	MS_MESH_0.1	N	0.44	143
325	MS_MESH_0.1	N	0.47	152.75
325	MS_MESH_0.1	N	0.43	139.75
325	MS_MESH_0.1	N	0.43	139.75
325	MS_MESH_0.1	N	0.48	156
325	MS_MESH_0.1	N	0.43	139.75
325	MS_MESH_0.1	N	0.42	136.5
325	MS_MESH_0.1	N	0.42	136.5
325	MS_MESH_0.1	N	0.4	130
325	MS_MESH_0.1	N	0.46	149.5
325	MS_MESH_0.1	N	0.48	156
325	MS_MESH_0.1	N	0.47	152.75
325	MS_MESH_0.1	N	0.47	152.75
325	MS_MESH_0.1	N	0.48	156
325	MS_MESH_0.1	N	0.47	152.75
325	MS_MESH_0.1	N	0.48	156
480	MS_MESH_0.1	N	0.34	163.2
480	MS_MESH_0.1	N	0.34	163.2
480	MS_MESH_0.1	N	0.34	163.2
480	MS_MESH_0.1	N	0.49	235.2
480	MS_MESH_0.1	N	0.31	148.8
480	MS_MESH_0.1	N	0.4	192
480	MS_MESH_0.1	N	0.33	158.4
480	MS_MESH_0.1	N	0.32	153.6
480	MS_MESH_0.1	N	0.24	115.2
480	MS_MESH_0.1	N	0.3	144
480	MS_MESH_0.1	N	0.35	168
480	MS_MESH_0.1	N	0.38	182.4
480	MS_MESH_0.1	N	0.28	134.4
480	MS_MESH_0.1	N	0.3	144
480	MS_MESH_0.1	N	0.32	153.6
480	MS_MESH_0.1	N	0.36	172.8
480	MS_MESH_0.1	N	0.3	144
480	MS_MESH_0.1	N	0.28	134.4
480	MS_MESH_0.1	N	0.32	153.6
480	MS_MESH_0.1	N	0.35	168
480	MS_MESH_0.1	N	0.31	148.8
480	MS_MESH_0.1	N	0.31	148.8
480	MS_MESH_0.1	N	0.37	177.6
480	MS_MESH_0.1	N	0.31	148.8
480	MS_MESH_0.1	N	0.29	139.2
480	MS_MESH_0.1	N	0.3	144
480	MS_MESH_0.1	N	0.29	139.2
480	MS_MESH_0.1	N	0.35	168
480	MS_MESH_0.1	N	0.37	177.6
480	MS_MESH_0.1	N	0.35	168
480	MS_MESH_0.1	N	0.35	168
480	MS_MESH_0.1	N	0.36	172.8
480	MS_MESH_0.1	N	0.35	168
480	MS_MESH_0.1	N	0.37	177.6
665	MS_MESH_0.1	N	0.26	172.9
665	MS_MESH_0.1	N	0.26	172.9
665	MS_MESH_0.1	N	0.25	166.25
665	MS_MESH_0.1	N	0.41	272.65
665	MS_MESH_0.1	N	0.23	152.95
665	MS_MESH_0.1	N	0.31	206.15
665	MS_MESH_0.1	N	0.24	159.6
665	MS_MESH_0.1	N	0.24	159.6
665	MS_MESH_0.1	N	0.18	119.7
665	MS_MESH_0.1	N	0.22	146.3
665	MS_MESH_0.1	N	0.26	172.9
665	MS_MESH_0.1	N	0.28	186.2
665	MS_MESH_0.1	N	0.21	139.65
665	MS_MESH_0.1	N	0.22	146.3
665	MS_MESH_0.1	N	0.23	152.95
665	MS_MESH_0.1	N	0.27	179.55
665	MS_MESH_0.1	N	0.22	146.3
665	MS_MESH_0.1	N	0.21	139.65
665	MS_MESH_0.1	N	0.24	159.6
665	MS_MESH_0.1	N	0.26	172.9
665	MS_MESH_0.1	N	0.23	152.95
665	MS_MESH_0.1	N	0.24	159.6
665	MS_MESH_0.1	N	0.28	186.2
665	MS_MESH_0.1	N	0.24	159.6
665	MS_MESH_0.1	N	0.22	146.3
665	MS_MESH_0.1	N	0.22	146.3
665	MS_MESH_0.1	N	0.21	139.65
665	MS_MESH_0.1	N	0.27	179.55
665	MS_MESH_0.1	N	0.28	186.2
665	MS_MESH_0.1	N	0.26	172.9
665	MS_MESH_0.1	N	0.27	179.55
665	MS_MESH_0.1	N	0.27	179.55
665	MS_MESH_0.1	N	0.27	179.55
665	MS_MESH_0.1	N	0.28	186.2
866	MS_MESH_0.1	N	0.2	173.2
866	MS_MESH_0.1	N	0.19	164.54
866	MS_MESH_0.1	N	0.19	164.54
866	MS_MESH_0.1	N	0.31	268.46
866	MS_MESH_0.1	N	0.18	155.88
866	MS_MESH_0.1	N	0.24	207.84
866	MS_MESH_0.1	N	0.19	164.54
866	MS_MESH_0.1	N	0.19	164.54
866	MS_MESH_0.1	N	0.13	112.58
866	MS_MESH_0.1	N	0.18	155.88
866	MS_MESH_0.1	N	0.21	181.86
866	MS_MESH_0.1	N	0.23	199.18
866	MS_MESH_0.1	N	0.17	147.22
866	MS_MESH_0.1	N	0.18	155.88
866	MS_MESH_0.1	N	0.19	164.54
866	MS_MESH_0.1	N	0.22	190.52
866	MS_MESH_0.1	N	0.18	155.88
866	MS_MESH_0.1	N	0.17	147.22
866	MS_MESH_0.1	N	0.18	155.88
866	MS_MESH_0.1	N	0.21	181.86
866	MS_MESH_0.1	N	0.19	164.54
866	MS_MESH_0.1	N	0.2	173.2
866	MS_MESH_0.1	N	0.22	190.52
866	MS_MESH_0.1	N	0.17	147.22
866	MS_MESH_0.1	N	0.16	138.56
866	MS_MESH_0.1	N	0.18	155.88
866	MS_MESH_0.1	N	0.17	147.22
866	MS_MESH_0.1	N	0.21	181.86
866	MS_MESH_0.1	N	0.23	199.18
866	MS_MESH_0.1	N	0.21	181.86
866	MS_MESH_0.1	N	0.21	181.86
866	MS_MESH_0.1	N	0.21	181.86
866	MS_MESH_0.1	N	0.2	173.2
866	MS_MESH_0.1	N	0.22	190.52
1098	MS_MESH_0.1	N	0.17	186.66
1098	MS_MESH_0.1	N	0.16	175.68
1098	MS_MESH_0.1	N	0.16	175.68
1098	MS_MESH_0.1	N	0.24	263.52
1098	MS_MESH_0.1	N	0.14	153.72
1098	MS_MESH_0.1	N	0.2	219.6
1098	MS_MESH_0.1	N	0.16	175.68
1098	MS_MESH_0.1	N	0.15	164.7
1098	MS_MESH_0.1	N	0.1	109.8
1098	MS_MESH_0.1	N	0.15	164.7
1098	MS_MESH_0.1	N	0.17	186.66
1098	MS_MESH_0.1	N	0.19	208.62
1098	MS_MESH_0.1	N	0.15	164.7
1098	MS_MESH_0.1	N	0.14	153.72
1098	MS_MESH_0.1	N	0.15	164.7
1098	MS_MESH_0.1	N	0.17	186.66
1098	MS_MESH_0.1	N	0.13	142.74
1098	MS_MESH_0.1	N	0.13	142.74
1098	MS_MESH_0.1	N	0.15	164.7
1098	MS_MESH_0.1	N	0.17	186.66
1098	MS_MESH_0.1	N	0.14	153.72
1098	MS_MESH_0.1	N	0.15	164.7
1098	MS_MESH_0.1	N	0.17	186.66
1098	MS_MESH_0.1	N	0.14	153.72
1098	MS_MESH_0.1	N	0.15	164.7
1098	MS_MESH_0.1	N	0.14	153.72
1098	MS_MESH_0.1	N	0.14	153.72
1098	MS_MESH_0.1	N	0.17	186.66
1098	MS_MESH_0.1	N	0.19	208.62
1098	MS_MESH_0.1	N	0.16	175.68
1098	MS_MESH_0.1	N	0.16	175.68
1098	MS_MESH_0.1	N	0.18	197.64
1098	MS_MESH_0.1	N	0.17	186.66
1098	MS_MESH_0.1	N	0.18	197.64
27	N50_MESH_0	no_N	0.62	16.74
27	N50_MESH_0	no_N	0.35	9.45
27	N50_MESH_0	no_N	0.19	5.13
27	N50_MESH_0	no_N	0.69	18.63
27	N50_MESH_0	no_N	0.36	9.72
27	N50_MESH_0	no_N	0.66	17.82
27	N50_MESH_0	no_N	0.53	14.31
27	N50_MESH_0	no_N	0.38	10.26
27	N50_MESH_0	no_N	0.34	9.18
27	N50_MESH_0	no_N	0.67	18.09
27	N50_MESH_0	no_N	0.6	16.2
27	N50_MESH_0	no_N	0.62	16.74
27	N50_MESH_0	no_N	0.2	5.4
27	N50_MESH_0	no_N	0.67	18.09
27	N50_MESH_0	no_N	0.22	5.94
27	N50_MESH_0	no_N	0.69	18.63
27	N50_MESH_0	no_N	0.49	13.23
27	N50_MESH_0	no_N	0.65	17.55
27	N50_MESH_0	no_N	0.21	5.67
27	N50_MESH_0	no_N	0.57	15.39
27	N50_MESH_0	no_N	0.63	17.01
27	N50_MESH_0	no_N	0.55	14.85
27	N50_MESH_0	no_N	0.73	19.71
27	N50_MESH_0	no_N	0.55	14.85
27	N50_MESH_0	no_N	0.64	17.28
27	N50_MESH_0	no_N	0.1	2.7
27	N50_MESH_0	no_N	0.55	14.85
27	N50_MESH_0	no_N	0.69	18.63
27	N50_MESH_0	no_N	0.43	11.61
27	N50_MESH_0	no_N	0.58	15.66
27	N50_MESH_0	no_N	0.61	16.47
27	N50_MESH_0	no_N	0.47	12.69
27	N50_MESH_0	no_N	0.66	17.82
27	N50_MESH_0	no_N	0.69	18.63
27	N50_MESH_0	no_N	0.7	18.9
27	N50_MESH_0	no_N	0.39	10.53
27	N50_MESH_0	no_N	0.66	17.82
27	N50_MESH_0	no_N	0.59	15.93
27	N50_MESH_0	no_N	0.57	15.39
27	N50_MESH_0	no_N	0.2	5.4
27	N50_MESH_0	no_N	0.66	17.82
27	N50_MESH_0	no_N	0.68	18.36
27	N50_MESH_0	no_N	0.61	16.47
27	N50_MESH_0	no_N	0.39	10.53
27	N50_MESH_0	no_N	0.71	19.17
27	N50_MESH_0	no_N	0.24	6.48
27	N50_MESH_0	no_N	0.6	16.2
27	N50_MESH_0	no_N	0.15	4.05
27	N50_MESH_0	no_N	0.54	14.58
27	N50_MESH_0	no_N	0.65	17.55
27	N50_MESH_0	no_N	0.62	16.74
27	N50_MESH_0	no_N	0.6	16.2
27	N50_MESH_0	no_N	0.52	14.04
27	N50_MESH_0	no_N	0.66	17.82
27	N50_MESH_0	no_N	0.16	4.32
27	N50_MESH_0	no_N	0.25	6.75
27	N50_MESH_0	no_N	0.66	17.82
27	N50_MESH_0	no_N	0.63	17.01
27	N50_MESH_0	no_N	0.44	11.88
27	N50_MESH_0	no_N	0.68	18.36
27	N50_MESH_0	no_N	0.57	15.39
27	N50_MESH_0	no_N	0.35	9.45
27	N50_MESH_0	no_N	0.49	13.23
27	N50_MESH_0	no_N	0.34	9.18
27	N50_MESH_0	no_N	0.59	15.93
27	N50_MESH_0	no_N	0.23	6.21
27	N50_MESH_0	no_N	0.68	18.36
27	N50_MESH_0	no_N	0.57	15.39
27	N50_MESH_0	no_N	0.26	7.02
27	N50_MESH_0	no_N	0.6	16.2
27	N50_MESH_0	no_N	0.69	18.63
27	N50_MESH_0	no_N	0.68	18.36
27	N50_MESH_0	no_N	0.67	18.09
27	N50_MESH_0	no_N	0.64	17.28
27	N50_MESH_0	no_N	0.59	15.93
27	N50_MESH_0	no_N	0.67	18.09
27	N50_MESH_0	no_N	0.24	6.48
27	N50_MESH_0	no_N	0.64	17.28
27	N50_MESH_0	no_N	0.25	6.75
27	N50_MESH_0	no_N	0.4	10.8
27	N50_MESH_0	no_N	0.58	15.66
27	N50_MESH_0	no_N	0.52	14.04
27	N50_MESH_0	no_N	0.64	17.28
27	N50_MESH_0	no_N	0.68	18.36
27	N50_MESH_0	no_N	0.62	16.74
27	N50_MESH_0	no_N	0.19	5.13
27	N50_MESH_0	no_N	0.63	17.01
27	N50_MESH_0	no_N	0.61	16.47
27	N50_MESH_0	no_N	0.23	6.21
27	N50_MESH_0	no_N	0.34	9.18
27	N50_MESH_0	no_N	0.73	19.71
27	N50_MESH_0	no_N	0.72	19.44
27	N50_MESH_0	no_N	0.67	18.09
27	N50_MESH_0	no_N	0.51	13.77
27	N50_MESH_0	no_N	0.64	17.28
27	N50_MESH_0	no_N	0.22	5.94
27	N50_MESH_0	no_N	0.26	7.02
27	N50_MESH_0	no_N	0.45	12.15
27	N50_MESH_0	no_N	0.64	17.28
65	N50_MESH_0	no_N	0.58	37.7
65	N50_MESH_0	no_N	0.24	15.6
65	N50_MESH_0	no_N	0.15	9.75
65	N50_MESH_0	no_N	0.65	42.25
65	N50_MESH_0	no_N	0.3	19.5
65	N50_MESH_0	no_N	0.6	39
65	N50_MESH_0	no_N	0.48	31.2
65	N50_MESH_0	no_N	0.31	20.15
65	N50_MESH_0	no_N	0.25	16.25
65	N50_MESH_0	no_N	0.62	40.3
65	N50_MESH_0	no_N	0.53	34.45
65	N50_MESH_0	no_N	0.56	36.4
65	N50_MESH_0	no_N	0.23	14.95
65	N50_MESH_0	no_N	0.61	39.65
65	N50_MESH_0	no_N	0.25	16.25
65	N50_MESH_0	no_N	0.64	41.6
65	N50_MESH_0	no_N	0.44	28.6
65	N50_MESH_0	no_N	0.59	38.35
65	N50_MESH_0	no_N	0.16	10.4
65	N50_MESH_0	no_N	0.51	33.15
65	N50_MESH_0	no_N	0.57	37.05
65	N50_MESH_0	no_N	0.5	32.5
65	N50_MESH_0	no_N	0.69	44.85
65	N50_MESH_0	no_N	0.5	32.5
65	N50_MESH_0	no_N	0.59	38.35
65	N50_MESH_0	no_N	0.12	7.8
65	N50_MESH_0	no_N	0.49	31.85
65	N50_MESH_0	no_N	0.63	40.95
65	N50_MESH_0	no_N	0.38	24.7
65	N50_MESH_0	no_N	0.53	34.45
65	N50_MESH_0	no_N	0.55	35.75
65	N50_MESH_0	no_N	0.4	26
65	N50_MESH_0	no_N	0.61	39.65
65	N50_MESH_0	no_N	0.64	41.6
65	N50_MESH_0	no_N	0.65	42.25
65	N50_MESH_0	no_N	0.33	21.45
65	N50_MESH_0	no_N	0.6	39
65	N50_MESH_0	no_N	0.54	35.1
65	N50_MESH_0	no_N	0.52	33.8
65	N50_MESH_0	no_N	0.17	11.05
65	N50_MESH_0	no_N	0.61	39.65
65	N50_MESH_0	no_N	0.64	41.6
65	N50_MESH_0	no_N	0.56	36.4
65	N50_MESH_0	no_N	0.32	20.8
65	N50_MESH_0	no_N	0.67	43.55
65	N50_MESH_0	no_N	0.19	12.35
65	N50_MESH_0	no_N	0.54	35.1
65	N50_MESH_0	no_N	0.15	9.75
65	N50_MESH_0	no_N	0.5	32.5
65	N50_MESH_0	no_N	0.6	39
65	N50_MESH_0	no_N	0.56	36.4
65	N50_MESH_0	no_N	0.54	35.1
65	N50_MESH_0	no_N	0.46	29.9
65	N50_MESH_0	no_N	0.61	39.65
65	N50_MESH_0	no_N	0.15	9.75
65	N50_MESH_0	no_N	0.21	13.65
65	N50_MESH_0	no_N	0.62	40.3
65	N50_MESH_0	no_N	0.57	37.05
65	N50_MESH_0	no_N	0.38	24.7
65	N50_MESH_0	no_N	0.63	40.95
65	N50_MESH_0	no_N	0.5	32.5
65	N50_MESH_0	no_N	0.31	20.15
65	N50_MESH_0	no_N	0.44	28.6
65	N50_MESH_0	no_N	0.28	18.2
65	N50_MESH_0	no_N	0.53	34.45
65	N50_MESH_0	no_N	0.15	9.75
65	N50_MESH_0	no_N	0.64	41.6
65	N50_MESH_0	no_N	0.5	32.5
65	N50_MESH_0	no_N	0.19	12.35
65	N50_MESH_0	no_N	0.55	35.75
65	N50_MESH_0	no_N	0.64	41.6
65	N50_MESH_0	no_N	0.63	40.95
65	N50_MESH_0	no_N	0.63	40.95
65	N50_MESH_0	no_N	0.58	37.7
65	N50_MESH_0	no_N	0.53	34.45
65	N50_MESH_0	no_N	0.63	40.95
65	N50_MESH_0	no_N	0.2	13
65	N50_MESH_0	no_N	0.58	37.7
65	N50_MESH_0	no_N	0.22	14.3
65	N50_MESH_0	no_N	0.33	21.45
65	N50_MESH_0	no_N	0.52	33.8
65	N50_MESH_0	no_N	0.46	29.9
65	N50_MESH_0	no_N	0.58	37.7
65	N50_MESH_0	no_N	0.63	40.95
65	N50_MESH_0	no_N	0.56	36.4
65	N50_MESH_0	no_N	0.14	9.1
65	N50_MESH_0	no_N	0.57	37.05
65	N50_MESH_0	no_N	0.56	36.4
65	N50_MESH_0	no_N	0.19	12.35
65	N50_MESH_0	no_N	0.27	17.55
65	N50_MESH_0	no_N	0.69	44.85
65	N50_MESH_0	no_N	0.67	43.55
65	N50_MESH_0	no_N	0.62	40.3
65	N50_MESH_0	no_N	0.47	30.55
65	N50_MESH_0	no_N	0.59	38.35
65	N50_MESH_0	no_N	0.15	9.75
65	N50_MESH_0	no_N	0.25	16.25
65	N50_MESH_0	no_N	0.4	26
65	N50_MESH_0	no_N	0.58	37.7
124	N50_MESH_0	no_N	0.47	58.28
124	N50_MESH_0	no_N	0.31	38.44
124	N50_MESH_0	no_N	0.13	16.12
124	N50_MESH_0	no_N	0.55	68.2
124	N50_MESH_0	no_N	0.23	28.52
124	N50_MESH_0	no_N	0.47	58.28
124	N50_MESH_0	no_N	0.35	43.4
124	N50_MESH_0	no_N	0.26	32.24
124	N50_MESH_0	no_N	0.16	19.84
124	N50_MESH_0	no_N	0.48	59.52
124	N50_MESH_0	no_N	0.39	48.36
124	N50_MESH_0	no_N	0.43	53.32
124	N50_MESH_0	no_N	0.12	14.88
124	N50_MESH_0	no_N	0.49	60.76
124	N50_MESH_0	no_N	0.21	26.04
124	N50_MESH_0	no_N	0.52	64.48
124	N50_MESH_0	no_N	0.33	40.92
124	N50_MESH_0	no_N	0.47	58.28
124	N50_MESH_0	no_N	0.1	12.4
124	N50_MESH_0	no_N	0.39	48.36
124	N50_MESH_0	no_N	0.45	55.8
124	N50_MESH_0	no_N	0.38	47.12
124	N50_MESH_0	no_N	0.59	73.16
124	N50_MESH_0	no_N	0.37	45.88
124	N50_MESH_0	no_N	0.46	57.04
124	N50_MESH_0	no_N	0.12	14.88
124	N50_MESH_0	no_N	0.36	44.64
124	N50_MESH_0	no_N	0.52	64.48
124	N50_MESH_0	no_N	0.3	37.2
124	N50_MESH_0	no_N	0.42	52.08
124	N50_MESH_0	no_N	0.41	50.84
124	N50_MESH_0	no_N	0.3	37.2
124	N50_MESH_0	no_N	0.49	60.76
124	N50_MESH_0	no_N	0.53	65.72
124	N50_MESH_0	no_N	0.54	66.96
124	N50_MESH_0	no_N	0.24	29.76
124	N50_MESH_0	no_N	0.47	58.28
124	N50_MESH_0	no_N	0.4	49.6
124	N50_MESH_0	no_N	0.4	49.6
124	N50_MESH_0	no_N	0.11	13.64
124	N50_MESH_0	no_N	0.49	60.76
124	N50_MESH_0	no_N	0.52	64.48
124	N50_MESH_0	no_N	0.45	55.8
124	N50_MESH_0	no_N	0.22	27.28
124	N50_MESH_0	no_N	0.58	71.92
124	N50_MESH_0	no_N	0.12	14.88
124	N50_MESH_0	no_N	0.41	50.84
124	N50_MESH_0	no_N	0.08	9.92
124	N50_MESH_0	no_N	0.37	45.88
124	N50_MESH_0	no_N	0.48	59.52
124	N50_MESH_0	no_N	0.42	52.08
124	N50_MESH_0	no_N	0.41	50.84
124	N50_MESH_0	no_N	0.32	39.68
124	N50_MESH_0	no_N	0.48	59.52
124	N50_MESH_0	no_N	0.09	11.16
124	N50_MESH_0	no_N	0.13	16.12
124	N50_MESH_0	no_N	0.5	62
124	N50_MESH_0	no_N	0.43	53.32
124	N50_MESH_0	no_N	0.29	35.96
124	N50_MESH_0	no_N	0.51	63.24
124	N50_MESH_0	no_N	0.37	45.88
124	N50_MESH_0	no_N	0.26	32.24
124	N50_MESH_0	no_N	0.33	40.92
124	N50_MESH_0	no_N	0.22	27.28
124	N50_MESH_0	no_N	0.41	50.84
124	N50_MESH_0	no_N	0.13	16.12
124	N50_MESH_0	no_N	0.53	65.72
124	N50_MESH_0	no_N	0.37	45.88
124	N50_MESH_0	no_N	0.17	21.08
124	N50_MESH_0	no_N	0.43	53.32
124	N50_MESH_0	no_N	0.53	65.72
124	N50_MESH_0	no_N	0.51	63.24
124	N50_MESH_0	no_N	0.5	62
124	N50_MESH_0	no_N	0.45	55.8
124	N50_MESH_0	no_N	0.38	47.12
124	N50_MESH_0	no_N	0.5	62
124	N50_MESH_0	no_N	0.15	18.6
124	N50_MESH_0	no_N	0.47	58.28
124	N50_MESH_0	no_N	0.13	16.12
124	N50_MESH_0	no_N	0.29	35.96
124	N50_MESH_0	no_N	0.4	49.6
124	N50_MESH_0	no_N	0.35	43.4
124	N50_MESH_0	no_N	0.46	57.04
124	N50_MESH_0	no_N	0.5	62
124	N50_MESH_0	no_N	0.44	54.56
124	N50_MESH_0	no_N	0.08	9.92
124	N50_MESH_0	no_N	0.45	55.8
124	N50_MESH_0	no_N	0.42	52.08
124	N50_MESH_0	no_N	0.14	17.36
124	N50_MESH_0	no_N	0.19	23.56
124	N50_MESH_0	no_N	0.6	74.4
124	N50_MESH_0	no_N	0.57	70.68
124	N50_MESH_0	no_N	0.49	60.76
124	N50_MESH_0	no_N	0.36	44.64
124	N50_MESH_0	no_N	0.48	59.52
124	N50_MESH_0	no_N	0.12	14.88
124	N50_MESH_0	no_N	0.18	22.32
124	N50_MESH_0	no_N	0.3	37.2
124	N50_MESH_0	no_N	0.45	55.8
217	N50_MESH_0	no_N	0.31	67.27
217	N50_MESH_0	no_N	0.3	65.1
217	N50_MESH_0	no_N	0.12	26.04
217	N50_MESH_0	no_N	0.4	86.8
217	N50_MESH_0	no_N	0.17	36.89
217	N50_MESH_0	no_N	0.32	69.44
217	N50_MESH_0	no_N	0.25	54.25
217	N50_MESH_0	no_N	0.16	34.72
217	N50_MESH_0	no_N	0.12	26.04
217	N50_MESH_0	no_N	0.34	73.78
217	N50_MESH_0	no_N	0.26	56.42
217	N50_MESH_0	no_N	0.29	62.93
217	N50_MESH_0	no_N	0.07	15.19
217	N50_MESH_0	no_N	0.35	75.95
217	N50_MESH_0	no_N	0.12	26.04
217	N50_MESH_0	no_N	0.38	82.46
217	N50_MESH_0	no_N	0.21	45.57
217	N50_MESH_0	no_N	0.32	69.44
217	N50_MESH_0	no_N	0.08	17.36
217	N50_MESH_0	no_N	0.26	56.42
217	N50_MESH_0	no_N	0.3	65.1
217	N50_MESH_0	no_N	0.25	54.25
217	N50_MESH_0	no_N	0.43	93.31
217	N50_MESH_0	no_N	0.23	49.91
217	N50_MESH_0	no_N	0.31	67.27
217	N50_MESH_0	no_N	0.07	15.19
217	N50_MESH_0	no_N	0.25	54.25
217	N50_MESH_0	no_N	0.38	82.46
217	N50_MESH_0	no_N	0.2	43.4
217	N50_MESH_0	no_N	0.28	60.76
217	N50_MESH_0	no_N	0.3	65.1
217	N50_MESH_0	no_N	0.22	47.74
217	N50_MESH_0	no_N	0.35	75.95
217	N50_MESH_0	no_N	0.37	80.29
217	N50_MESH_0	no_N	0.38	82.46
217	N50_MESH_0	no_N	0.15	32.55
217	N50_MESH_0	no_N	0.32	69.44
217	N50_MESH_0	no_N	0.26	56.42
217	N50_MESH_0	no_N	0.27	58.59
217	N50_MESH_0	no_N	0.07	15.19
217	N50_MESH_0	no_N	0.34	73.78
217	N50_MESH_0	no_N	0.37	80.29
217	N50_MESH_0	no_N	0.31	67.27
217	N50_MESH_0	no_N	0.17	36.89
217	N50_MESH_0	no_N	0.43	93.31
217	N50_MESH_0	no_N	0.09	19.53
217	N50_MESH_0	no_N	0.27	58.59
217	N50_MESH_0	no_N	0.04	8.68
217	N50_MESH_0	no_N	0.25	54.25
217	N50_MESH_0	no_N	0.34	73.78
217	N50_MESH_0	no_N	0.27	58.59
217	N50_MESH_0	no_N	0.27	58.59
217	N50_MESH_0	no_N	0.21	45.57
217	N50_MESH_0	no_N	0.34	73.78
217	N50_MESH_0	no_N	0.05	10.85
217	N50_MESH_0	no_N	0.07	15.19
217	N50_MESH_0	no_N	0.35	75.95
217	N50_MESH_0	no_N	0.29	62.93
217	N50_MESH_0	no_N	0.21	45.57
217	N50_MESH_0	no_N	0.35	75.95
217	N50_MESH_0	no_N	0.24	52.08
217	N50_MESH_0	no_N	0.18	39.06
217	N50_MESH_0	no_N	0.23	49.91
217	N50_MESH_0	no_N	0.12	26.04
217	N50_MESH_0	no_N	0.27	58.59
217	N50_MESH_0	no_N	0.06	13.02
217	N50_MESH_0	no_N	0.38	82.46
217	N50_MESH_0	no_N	0.25	54.25
217	N50_MESH_0	no_N	0.03	6.51
217	N50_MESH_0	no_N	0.29	62.93
217	N50_MESH_0	no_N	0.37	80.29
217	N50_MESH_0	no_N	0.35	75.95
217	N50_MESH_0	no_N	0.36	78.12
217	N50_MESH_0	no_N	0.3	65.1
217	N50_MESH_0	no_N	0.26	56.42
217	N50_MESH_0	no_N	0.36	78.12
217	N50_MESH_0	no_N	0.1	21.7
217	N50_MESH_0	no_N	0.34	73.78
217	N50_MESH_0	no_N	0.07	15.19
217	N50_MESH_0	no_N	0.22	47.74
217	N50_MESH_0	no_N	0.26	56.42
217	N50_MESH_0	no_N	0.23	49.91
217	N50_MESH_0	no_N	0.29	62.93
217	N50_MESH_0	no_N	0.34	73.78
217	N50_MESH_0	no_N	0.29	62.93
217	N50_MESH_0	no_N	0.05	10.85
217	N50_MESH_0	no_N	0.3	65.1
217	N50_MESH_0	no_N	0.28	60.76
217	N50_MESH_0	no_N	0.08	17.36
217	N50_MESH_0	no_N	0.11	23.87
217	N50_MESH_0	no_N	0.46	99.82
217	N50_MESH_0	no_N	0.43	93.31
217	N50_MESH_0	no_N	0.34	73.78
217	N50_MESH_0	no_N	0.24	52.08
217	N50_MESH_0	no_N	0.32	69.44
217	N50_MESH_0	no_N	0.07	15.19
217	N50_MESH_0	no_N	0.11	23.87
217	N50_MESH_0	no_N	0.2	43.4
217	N50_MESH_0	no_N	0.31	67.27
325	N50_MESH_0	no_N	0.21	68.25
325	N50_MESH_0	no_N	0.17	55.25
325	N50_MESH_0	no_N	0.01	3.25
325	N50_MESH_0	no_N	0.28	91
325	N50_MESH_0	no_N	0.11	35.75
325	N50_MESH_0	no_N	0.21	68.25
325	N50_MESH_0	no_N	0.16	52
325	N50_MESH_0	no_N	0.1	32.5
325	N50_MESH_0	no_N	0.06	19.5
325	N50_MESH_0	no_N	0.22	71.5
325	N50_MESH_0	no_N	0.18	58.5
325	N50_MESH_0	no_N	0.19	61.75
325	N50_MESH_0	no_N	0.06	19.5
325	N50_MESH_0	no_N	0.23	74.75
325	N50_MESH_0	no_N	0.06	19.5
325	N50_MESH_0	no_N	0.26	84.5
325	N50_MESH_0	no_N	0.16	52
325	N50_MESH_0	no_N	0.21	68.25
325	N50_MESH_0	no_N	0.06	19.5
325	N50_MESH_0	no_N	0.17	55.25
325	N50_MESH_0	no_N	0.22	71.5
325	N50_MESH_0	no_N	0.18	58.5
325	N50_MESH_0	no_N	0.31	100.75
325	N50_MESH_0	no_N	0.17	55.25
325	N50_MESH_0	no_N	0.22	71.5
325	N50_MESH_0	no_N	-0.02	-6.5
325	N50_MESH_0	no_N	0.17	55.25
325	N50_MESH_0	no_N	0.26	84.5
325	N50_MESH_0	no_N	0.12	39
325	N50_MESH_0	no_N	0.2	65
325	N50_MESH_0	no_N	0.19	61.75
325	N50_MESH_0	no_N	0.15	48.75
325	N50_MESH_0	no_N	0.22	71.5
325	N50_MESH_0	no_N	0.25	81.25
325	N50_MESH_0	no_N	0.27	87.75
325	N50_MESH_0	no_N	0.12	39
325	N50_MESH_0	no_N	0.22	71.5
325	N50_MESH_0	no_N	0.17	55.25
325	N50_MESH_0	no_N	0.2	65
325	N50_MESH_0	no_N	0.06	19.5
325	N50_MESH_0	no_N	0.23	74.75
325	N50_MESH_0	no_N	0.25	81.25
325	N50_MESH_0	no_N	0.21	68.25
325	N50_MESH_0	no_N	0.09	29.25
325	N50_MESH_0	no_N	0.3	97.5
325	N50_MESH_0	no_N	0.04	13
325	N50_MESH_0	no_N	0.19	61.75
325	N50_MESH_0	no_N	0	0
325	N50_MESH_0	no_N	0.18	58.5
325	N50_MESH_0	no_N	0.22	71.5
325	N50_MESH_0	no_N	0.19	61.75
325	N50_MESH_0	no_N	0.19	61.75
325	N50_MESH_0	no_N	0.14	45.5
325	N50_MESH_0	no_N	0.23	74.75
325	N50_MESH_0	no_N	0.03	9.75
325	N50_MESH_0	no_N	0.05	16.25
325	N50_MESH_0	no_N	0.24	78
325	N50_MESH_0	no_N	0.21	68.25
325	N50_MESH_0	no_N	0.17	55.25
325	N50_MESH_0	no_N	0.24	78
325	N50_MESH_0	no_N	0.17	55.25
325	N50_MESH_0	no_N	0.15	48.75
325	N50_MESH_0	no_N	0.17	55.25
325	N50_MESH_0	no_N	0.08	26
325	N50_MESH_0	no_N	0.19	61.75
325	N50_MESH_0	no_N	0.04	13
325	N50_MESH_0	no_N	0.26	84.5
325	N50_MESH_0	no_N	0.19	61.75
325	N50_MESH_0	no_N	0.07	22.75
325	N50_MESH_0	no_N	0.2	65
325	N50_MESH_0	no_N	0.25	81.25
325	N50_MESH_0	no_N	0.24	78
325	N50_MESH_0	no_N	0.25	81.25
325	N50_MESH_0	no_N	0.2	65
325	N50_MESH_0	no_N	0.17	55.25
325	N50_MESH_0	no_N	0.24	78
325	N50_MESH_0	no_N	0.05	16.25
325	N50_MESH_0	no_N	0.2	65
325	N50_MESH_0	no_N	0.07	22.75
325	N50_MESH_0	no_N	0.12	39
325	N50_MESH_0	no_N	0.19	61.75
325	N50_MESH_0	no_N	0.16	52
325	N50_MESH_0	no_N	0.21	68.25
325	N50_MESH_0	no_N	0.25	81.25
325	N50_MESH_0	no_N	0.2	65
325	N50_MESH_0	no_N	0.04	13
325	N50_MESH_0	no_N	0.21	68.25
325	N50_MESH_0	no_N	0.2	65
325	N50_MESH_0	no_N	0.05	16.25
325	N50_MESH_0	no_N	0.12	39
325	N50_MESH_0	no_N	0.35	113.75
325	N50_MESH_0	no_N	0.3	97.5
325	N50_MESH_0	no_N	0.25	81.25
325	N50_MESH_0	no_N	0.17	55.25
325	N50_MESH_0	no_N	0.23	74.75
325	N50_MESH_0	no_N	0.05	16.25
325	N50_MESH_0	no_N	0.1	32.5
325	N50_MESH_0	no_N	0.17	55.25
325	N50_MESH_0	no_N	0.23	74.75
480	N50_MESH_0	no_N	0.15	72
480	N50_MESH_0	no_N	-0.01	-4.8
480	N50_MESH_0	no_N	0.07	33.6
480	N50_MESH_0	no_N	0.18	86.4
480	N50_MESH_0	no_N	0.09	43.2
480	N50_MESH_0	no_N	0.14	67.2
480	N50_MESH_0	no_N	0.12	57.6
480	N50_MESH_0	no_N	0.05	24
480	N50_MESH_0	no_N	0.04	19.2
480	N50_MESH_0	no_N	0.15	72
480	N50_MESH_0	no_N	0.1	48
480	N50_MESH_0	no_N	0.13	62.4
480	N50_MESH_0	no_N	-0.01	-4.8
480	N50_MESH_0	no_N	0.15	72
480	N50_MESH_0	no_N	0.05	24
480	N50_MESH_0	no_N	0.16	76.8
480	N50_MESH_0	no_N	0.1	48
480	N50_MESH_0	no_N	0.13	62.4
480	N50_MESH_0	no_N	0.05	24
480	N50_MESH_0	no_N	0.11	52.8
480	N50_MESH_0	no_N	0.14	67.2
480	N50_MESH_0	no_N	0.12	57.6
480	N50_MESH_0	no_N	0.21	100.8
480	N50_MESH_0	no_N	0.1	48
480	N50_MESH_0	no_N	0.15	72
480	N50_MESH_0	no_N	-0.08	-38.4
480	N50_MESH_0	no_N	0.12	57.6
480	N50_MESH_0	no_N	0.17	81.6
480	N50_MESH_0	no_N	0.11	52.8
480	N50_MESH_0	no_N	0.12	57.6
480	N50_MESH_0	no_N	0.11	52.8
480	N50_MESH_0	no_N	0.12	57.6
480	N50_MESH_0	no_N	0.17	81.6
480	N50_MESH_0	no_N	0.18	86.4
480	N50_MESH_0	no_N	0.18	86.4
480	N50_MESH_0	no_N	0.07	33.6
480	N50_MESH_0	no_N	0.16	76.8
480	N50_MESH_0	no_N	0.13	62.4
480	N50_MESH_0	no_N	0.12	57.6
480	N50_MESH_0	no_N	0.04	19.2
480	N50_MESH_0	no_N	0.15	72
480	N50_MESH_0	no_N	0.17	81.6
480	N50_MESH_0	no_N	0.14	67.2
480	N50_MESH_0	no_N	0.04	19.2
480	N50_MESH_0	no_N	0.21	100.8
480	N50_MESH_0	no_N	0.03	14.4
480	N50_MESH_0	no_N	0.13	62.4
480	N50_MESH_0	no_N	0.02	9.6
480	N50_MESH_0	no_N	0.12	57.6
480	N50_MESH_0	no_N	0.15	72
480	N50_MESH_0	no_N	0.13	62.4
480	N50_MESH_0	no_N	0.12	57.6
480	N50_MESH_0	no_N	0.1	48
480	N50_MESH_0	no_N	0.15	72
480	N50_MESH_0	no_N	0.01	4.8
480	N50_MESH_0	no_N	0.03	14.4
480	N50_MESH_0	no_N	0.15	72
480	N50_MESH_0	no_N	0.13	62.4
480	N50_MESH_0	no_N	0.1	48
480	N50_MESH_0	no_N	0.16	76.8
480	N50_MESH_0	no_N	0.13	62.4
480	N50_MESH_0	no_N	0.1	48
480	N50_MESH_0	no_N	0.12	57.6
480	N50_MESH_0	no_N	0.07	33.6
480	N50_MESH_0	no_N	0.13	62.4
480	N50_MESH_0	no_N	0.01	4.8
480	N50_MESH_0	no_N	0.16	76.8
480	N50_MESH_0	no_N	0.12	57.6
480	N50_MESH_0	no_N	0.08	38.4
480	N50_MESH_0	no_N	0.14	67.2
480	N50_MESH_0	no_N	0.17	81.6
480	N50_MESH_0	no_N	0.16	76.8
480	N50_MESH_0	no_N	0.17	81.6
480	N50_MESH_0	no_N	0.15	72
480	N50_MESH_0	no_N	0.12	57.6
480	N50_MESH_0	no_N	0.17	81.6
480	N50_MESH_0	no_N	0.01	4.8
480	N50_MESH_0	no_N	0.16	76.8
480	N50_MESH_0	no_N	0.05	24
480	N50_MESH_0	no_N	0.09	43.2
480	N50_MESH_0	no_N	0.12	57.6
480	N50_MESH_0	no_N	0.12	57.6
480	N50_MESH_0	no_N	0.15	72
480	N50_MESH_0	no_N	0.16	76.8
480	N50_MESH_0	no_N	0.13	62.4
480	N50_MESH_0	no_N	0.04	19.2
480	N50_MESH_0	no_N	0.13	62.4
480	N50_MESH_0	no_N	0.14	67.2
480	N50_MESH_0	no_N	0.03	14.4
480	N50_MESH_0	no_N	0.08	38.4
480	N50_MESH_0	no_N	0.24	115.2
480	N50_MESH_0	no_N	0.2	96
480	N50_MESH_0	no_N	0.15	72
480	N50_MESH_0	no_N	0.14	67.2
480	N50_MESH_0	no_N	0.16	76.8
480	N50_MESH_0	no_N	0.01	4.8
480	N50_MESH_0	no_N	0.06	28.8
480	N50_MESH_0	no_N	0.07	33.6
480	N50_MESH_0	no_N	0.11	52.8
665	N50_MESH_0	no_N	0.13	86.45
665	N50_MESH_0	no_N	0.12	79.8
665	N50_MESH_0	no_N	0.02	13.3
665	N50_MESH_0	no_N	0.15	99.75
665	N50_MESH_0	no_N	0.05	33.25
665	N50_MESH_0	no_N	0.1	66.5
665	N50_MESH_0	no_N	0.09	59.85
665	N50_MESH_0	no_N	0.06	39.9
665	N50_MESH_0	no_N	0.04	26.6
665	N50_MESH_0	no_N	0.13	86.45
665	N50_MESH_0	no_N	0.08	53.2
665	N50_MESH_0	no_N	0.09	59.85
665	N50_MESH_0	no_N	0.03	19.95
665	N50_MESH_0	no_N	0.13	86.45
665	N50_MESH_0	no_N	0.05	33.25
665	N50_MESH_0	no_N	0.14	93.1
665	N50_MESH_0	no_N	0.08	53.2
665	N50_MESH_0	no_N	0.12	79.8
665	N50_MESH_0	no_N	0.07	46.55
665	N50_MESH_0	no_N	0.1	66.5
665	N50_MESH_0	no_N	0.11	73.15
665	N50_MESH_0	no_N	0.08	53.2
665	N50_MESH_0	no_N	0.15	99.75
665	N50_MESH_0	no_N	0.08	53.2
665	N50_MESH_0	no_N	0.13	86.45
665	N50_MESH_0	no_N	0.13	86.45
665	N50_MESH_0	no_N	0.09	59.85
665	N50_MESH_0	no_N	0.13	86.45
665	N50_MESH_0	no_N	0.1	66.5
665	N50_MESH_0	no_N	0.09	59.85
665	N50_MESH_0	no_N	0.11	73.15
665	N50_MESH_0	no_N	0.1	66.5
665	N50_MESH_0	no_N	0.13	86.45
665	N50_MESH_0	no_N	0.14	93.1
665	N50_MESH_0	no_N	0.13	86.45
665	N50_MESH_0	no_N	0.05	33.25
665	N50_MESH_0	no_N	0.11	73.15
665	N50_MESH_0	no_N	0.1	66.5
665	N50_MESH_0	no_N	0.1	66.5
665	N50_MESH_0	no_N	0.01	6.65
665	N50_MESH_0	no_N	0.11	73.15
665	N50_MESH_0	no_N	0.11	73.15
665	N50_MESH_0	no_N	0.1	66.5
665	N50_MESH_0	no_N	0.05	33.25
665	N50_MESH_0	no_N	0.15	99.75
665	N50_MESH_0	no_N	0.02	13.3
665	N50_MESH_0	no_N	0.08	53.2
665	N50_MESH_0	no_N	0	0
665	N50_MESH_0	no_N	0.09	59.85
665	N50_MESH_0	no_N	0.11	73.15
665	N50_MESH_0	no_N	0.09	59.85
665	N50_MESH_0	no_N	0.1	66.5
665	N50_MESH_0	no_N	0.08	53.2
665	N50_MESH_0	no_N	0.11	73.15
665	N50_MESH_0	no_N	0.01	6.65
665	N50_MESH_0	no_N	0.02	13.3
665	N50_MESH_0	no_N	0.12	79.8
665	N50_MESH_0	no_N	0.1	66.5
665	N50_MESH_0	no_N	0.07	46.55
665	N50_MESH_0	no_N	0.12	79.8
665	N50_MESH_0	no_N	0.09	59.85
665	N50_MESH_0	no_N	0.06	39.9
665	N50_MESH_0	no_N	0.08	53.2
665	N50_MESH_0	no_N	0.03	19.95
665	N50_MESH_0	no_N	0.08	53.2
665	N50_MESH_0	no_N	0	0
665	N50_MESH_0	no_N	0.13	86.45
665	N50_MESH_0	no_N	0.08	53.2
665	N50_MESH_0	no_N	0.1	66.5
665	N50_MESH_0	no_N	0.1	66.5
665	N50_MESH_0	no_N	0.14	93.1
665	N50_MESH_0	no_N	0.12	79.8
665	N50_MESH_0	no_N	0.13	86.45
665	N50_MESH_0	no_N	0.11	73.15
665	N50_MESH_0	no_N	0.09	59.85
665	N50_MESH_0	no_N	0.12	79.8
665	N50_MESH_0	no_N	0.04	26.6
665	N50_MESH_0	no_N	0.12	79.8
665	N50_MESH_0	no_N	0.07	46.55
665	N50_MESH_0	no_N	0.07	46.55
665	N50_MESH_0	no_N	0.07	46.55
665	N50_MESH_0	no_N	0.08	53.2
665	N50_MESH_0	no_N	0.08	53.2
665	N50_MESH_0	no_N	0.12	79.8
665	N50_MESH_0	no_N	0.11	73.15
665	N50_MESH_0	no_N	0	0
665	N50_MESH_0	no_N	0.1	66.5
665	N50_MESH_0	no_N	0.09	59.85
665	N50_MESH_0	no_N	0.01	6.65
665	N50_MESH_0	no_N	0.07	46.55
665	N50_MESH_0	no_N	0.18	119.7
665	N50_MESH_0	no_N	0.15	99.75
665	N50_MESH_0	no_N	0.14	93.1
665	N50_MESH_0	no_N	0.11	73.15
665	N50_MESH_0	no_N	0.11	73.15
665	N50_MESH_0	no_N	0.02	13.3
665	N50_MESH_0	no_N	0	0
665	N50_MESH_0	no_N	0.07	46.55
665	N50_MESH_0	no_N	0.12	79.8
866	N50_MESH_0	no_N	0.1	86.6
866	N50_MESH_0	no_N	0.13	112.58
866	N50_MESH_0	no_N	-0.01	-8.66
866	N50_MESH_0	no_N	0.12	103.92
866	N50_MESH_0	no_N	0.06	51.96
866	N50_MESH_0	no_N	0.08	69.28
866	N50_MESH_0	no_N	0.07	60.62
866	N50_MESH_0	no_N	0.07	60.62
866	N50_MESH_0	no_N	0.05	43.3
866	N50_MESH_0	no_N	0.08	69.28
866	N50_MESH_0	no_N	0.09	77.94
866	N50_MESH_0	no_N	0.08	69.28
866	N50_MESH_0	no_N	0.1	86.6
866	N50_MESH_0	no_N	0.1	86.6
866	N50_MESH_0	no_N	0.07	60.62
866	N50_MESH_0	no_N	0.09	77.94
866	N50_MESH_0	no_N	0.05	43.3
866	N50_MESH_0	no_N	0.07	60.62
866	N50_MESH_0	no_N	0.03	25.98
866	N50_MESH_0	no_N	0.06	51.96
866	N50_MESH_0	no_N	0.08	69.28
866	N50_MESH_0	no_N	0.06	51.96
866	N50_MESH_0	no_N	0.12	103.92
866	N50_MESH_0	no_N	0.05	43.3
866	N50_MESH_0	no_N	0.07	60.62
866	N50_MESH_0	no_N	0.1	86.6
866	N50_MESH_0	no_N	0.06	51.96
866	N50_MESH_0	no_N	0.08	69.28
866	N50_MESH_0	no_N	0.05	43.3
866	N50_MESH_0	no_N	0.05	43.3
866	N50_MESH_0	no_N	0.06	51.96
866	N50_MESH_0	no_N	0.03	25.98
866	N50_MESH_0	no_N	0.08	69.28
866	N50_MESH_0	no_N	0.12	103.92
866	N50_MESH_0	no_N	0.1	86.6
866	N50_MESH_0	no_N	0.04	34.64
866	N50_MESH_0	no_N	0.09	77.94
866	N50_MESH_0	no_N	0.07	60.62
866	N50_MESH_0	no_N	0.08	69.28
866	N50_MESH_0	no_N	0.01	8.66
866	N50_MESH_0	no_N	0.09	77.94
866	N50_MESH_0	no_N	0.09	77.94
866	N50_MESH_0	no_N	0.06	51.96
866	N50_MESH_0	no_N	0.04	34.64
866	N50_MESH_0	no_N	0.11	95.26
866	N50_MESH_0	no_N	0.02	17.32
866	N50_MESH_0	no_N	0.07	60.62
866	N50_MESH_0	no_N	0.02	17.32
866	N50_MESH_0	no_N	0.08	69.28
866	N50_MESH_0	no_N	0.08	69.28
866	N50_MESH_0	no_N	0.09	77.94
866	N50_MESH_0	no_N	0.07	60.62
866	N50_MESH_0	no_N	0.04	34.64
866	N50_MESH_0	no_N	0.08	69.28
866	N50_MESH_0	no_N	0	0
866	N50_MESH_0	no_N	0.03	25.98
866	N50_MESH_0	no_N	0.07	60.62
866	N50_MESH_0	no_N	0.09	77.94
866	N50_MESH_0	no_N	0.06	51.96
866	N50_MESH_0	no_N	0.09	77.94
866	N50_MESH_0	no_N	0.07	60.62
866	N50_MESH_0	no_N	0.07	60.62
866	N50_MESH_0	no_N	0.07	60.62
866	N50_MESH_0	no_N	0	0
866	N50_MESH_0	no_N	0.07	60.62
866	N50_MESH_0	no_N	0.02	17.32
866	N50_MESH_0	no_N	0.1	86.6
866	N50_MESH_0	no_N	0.08	69.28
866	N50_MESH_0	no_N	-0.07	-60.62
866	N50_MESH_0	no_N	0.07	60.62
866	N50_MESH_0	no_N	0.09	77.94
866	N50_MESH_0	no_N	0.1	86.6
866	N50_MESH_0	no_N	0.1	86.6
866	N50_MESH_0	no_N	0.08	69.28
866	N50_MESH_0	no_N	0.07	60.62
866	N50_MESH_0	no_N	0.09	77.94
866	N50_MESH_0	no_N	0.01	8.66
866	N50_MESH_0	no_N	0.1	86.6
866	N50_MESH_0	no_N	0.02	17.32
866	N50_MESH_0	no_N	0.01	8.66
866	N50_MESH_0	no_N	0.07	60.62
866	N50_MESH_0	no_N	0.07	60.62
866	N50_MESH_0	no_N	0.07	60.62
866	N50_MESH_0	no_N	0.1	86.6
866	N50_MESH_0	no_N	0.09	77.94
866	N50_MESH_0	no_N	0.02	17.32
866	N50_MESH_0	no_N	0.06	51.96
866	N50_MESH_0	no_N	0.09	77.94
866	N50_MESH_0	no_N	-0.01	-8.66
866	N50_MESH_0	no_N	0.05	43.3
866	N50_MESH_0	no_N	0.11	95.26
866	N50_MESH_0	no_N	0.12	103.92
866	N50_MESH_0	no_N	0.09	77.94
866	N50_MESH_0	no_N	0.08	69.28
866	N50_MESH_0	no_N	0.12	103.92
866	N50_MESH_0	no_N	0	0
866	N50_MESH_0	no_N	-0.01	-8.66
866	N50_MESH_0	no_N	0.06	51.96
866	N50_MESH_0	no_N	0.09	77.94
1098	N50_MESH_0	no_N	0.04	43.92
1098	N50_MESH_0	no_N	0.07	76.86
1098	N50_MESH_0	no_N	-0.03	-32.94
1098	N50_MESH_0	no_N	0.09	98.82
1098	N50_MESH_0	no_N	0.04	43.92
1098	N50_MESH_0	no_N	0.06	65.88
1098	N50_MESH_0	no_N	0.06	65.88
1098	N50_MESH_0	no_N	0.04	43.92
1098	N50_MESH_0	no_N	0.03	32.94
1098	N50_MESH_0	no_N	0.06	65.88
1098	N50_MESH_0	no_N	0.03	32.94
1098	N50_MESH_0	no_N	0.06	65.88
1098	N50_MESH_0	no_N	0	0
1098	N50_MESH_0	no_N	0.05	54.9
1098	N50_MESH_0	no_N	0.02	21.96
1098	N50_MESH_0	no_N	0.08	87.84
1098	N50_MESH_0	no_N	0.05	54.9
1098	N50_MESH_0	no_N	0.06	65.88
1098	N50_MESH_0	no_N	0.04	43.92
1098	N50_MESH_0	no_N	0.07	76.86
1098	N50_MESH_0	no_N	0.08	87.84
1098	N50_MESH_0	no_N	0.06	65.88
1098	N50_MESH_0	no_N	0.07	76.86
1098	N50_MESH_0	no_N	0.06	65.88
1098	N50_MESH_0	no_N	0.07	76.86
1098	N50_MESH_0	no_N	0.13	142.74
1098	N50_MESH_0	no_N	0.06	65.88
1098	N50_MESH_0	no_N	0.07	76.86
1098	N50_MESH_0	no_N	0.06	65.88
1098	N50_MESH_0	no_N	0.05	54.9
1098	N50_MESH_0	no_N	0.06	65.88
1098	N50_MESH_0	no_N	0.04	43.92
1098	N50_MESH_0	no_N	0.08	87.84
1098	N50_MESH_0	no_N	0.07	76.86
1098	N50_MESH_0	no_N	0.09	98.82
1098	N50_MESH_0	no_N	0.02	21.96
1098	N50_MESH_0	no_N	0.07	76.86
1098	N50_MESH_0	no_N	0.06	65.88
1098	N50_MESH_0	no_N	0.05	54.9
1098	N50_MESH_0	no_N	0	0
1098	N50_MESH_0	no_N	0.07	76.86
1098	N50_MESH_0	no_N	0.07	76.86
1098	N50_MESH_0	no_N	0.04	43.92
1098	N50_MESH_0	no_N	0.03	32.94
1098	N50_MESH_0	no_N	0.09	98.82
1098	N50_MESH_0	no_N	0.02	21.96
1098	N50_MESH_0	no_N	0.06	65.88
1098	N50_MESH_0	no_N	0.03	32.94
1098	N50_MESH_0	no_N	0.04	43.92
1098	N50_MESH_0	no_N	0.08	87.84
1098	N50_MESH_0	no_N	0.04	43.92
1098	N50_MESH_0	no_N	0.05	54.9
1098	N50_MESH_0	no_N	0.04	43.92
1098	N50_MESH_0	no_N	0.06	65.88
1098	N50_MESH_0	no_N	0	0
1098	N50_MESH_0	no_N	0.01	10.98
1098	N50_MESH_0	no_N	0.06	65.88
1098	N50_MESH_0	no_N	0.08	87.84
1098	N50_MESH_0	no_N	0.02	21.96
1098	N50_MESH_0	no_N	0.09	98.82
1098	N50_MESH_0	no_N	0.04	43.92
1098	N50_MESH_0	no_N	0.02	21.96
1098	N50_MESH_0	no_N	0.04	43.92
1098	N50_MESH_0	no_N	0.01	10.98
1098	N50_MESH_0	no_N	0.07	76.86
1098	N50_MESH_0	no_N	0.04	43.92
1098	N50_MESH_0	no_N	0.07	76.86
1098	N50_MESH_0	no_N	0.06	65.88
1098	N50_MESH_0	no_N	0.01	10.98
1098	N50_MESH_0	no_N	0.06	65.88
1098	N50_MESH_0	no_N	0.1	109.8
1098	N50_MESH_0	no_N	0.07	76.86
1098	N50_MESH_0	no_N	0.06	65.88
1098	N50_MESH_0	no_N	0.07	76.86
1098	N50_MESH_0	no_N	0.05	54.9
1098	N50_MESH_0	no_N	0.08	87.84
1098	N50_MESH_0	no_N	0.01	10.98
1098	N50_MESH_0	no_N	0.04	43.92
1098	N50_MESH_0	no_N	-0.03	-32.94
1098	N50_MESH_0	no_N	0.08	87.84
1098	N50_MESH_0	no_N	0.06	65.88
1098	N50_MESH_0	no_N	0.04	43.92
1098	N50_MESH_0	no_N	0.05	54.9
1098	N50_MESH_0	no_N	0.09	98.82
1098	N50_MESH_0	no_N	0.08	87.84
1098	N50_MESH_0	no_N	0	0
1098	N50_MESH_0	no_N	0.07	76.86
1098	N50_MESH_0	no_N	0.06	65.88
1098	N50_MESH_0	no_N	-0.01	-10.98
1098	N50_MESH_0	no_N	0.03	32.94
1098	N50_MESH_0	no_N	0.11	120.78
1098	N50_MESH_0	no_N	0.11	120.78
1098	N50_MESH_0	no_N	0.07	76.86
1098	N50_MESH_0	no_N	0.05	54.9
1098	N50_MESH_0	no_N	0.06	65.88
1098	N50_MESH_0	no_N	0.02	21.96
1098	N50_MESH_0	no_N	0	0
1098	N50_MESH_0	no_N	0.02	21.96
1098	N50_MESH_0	no_N	0.04	43.92
27	N50_MESH_0.1	no_N	0.73	19.71
27	N50_MESH_0.1	no_N	0.73	19.71
27	N50_MESH_0.1	no_N	0.73	19.71
27	N50_MESH_0.1	no_N	0.71	19.17
27	N50_MESH_0.1	no_N	0.69	18.63
27	N50_MESH_0.1	no_N	0.74	19.98
27	N50_MESH_0.1	no_N	0.7	18.9
27	N50_MESH_0.1	no_N	0.76	20.52
27	N50_MESH_0.1	no_N	0.65	17.55
27	N50_MESH_0.1	no_N	0.73	19.71
27	N50_MESH_0.1	no_N	0.61	16.47
27	N50_MESH_0.1	no_N	0.69	18.63
27	N50_MESH_0.1	no_N	0.7	18.9
27	N50_MESH_0.1	no_N	0.69	18.63
27	N50_MESH_0.1	no_N	0.7	18.9
27	N50_MESH_0.1	no_N	0.59	15.93
27	N50_MESH_0.1	no_N	0.71	19.17
27	N50_MESH_0.1	no_N	0.66	17.82
27	N50_MESH_0.1	no_N	0.64	17.28
27	N50_MESH_0.1	no_N	0.71	19.17
27	N50_MESH_0.1	no_N	0.62	16.74
27	N50_MESH_0.1	no_N	0.62	16.74
27	N50_MESH_0.1	no_N	0.66	17.82
27	N50_MESH_0.1	no_N	0.71	19.17
27	N50_MESH_0.1	no_N	0.68	18.36
27	N50_MESH_0.1	no_N	0.49	13.23
27	N50_MESH_0.1	no_N	0.56	15.12
27	N50_MESH_0.1	no_N	0.71	19.17
27	N50_MESH_0.1	no_N	0.68	18.36
27	N50_MESH_0.1	no_N	0.7	18.9
27	N50_MESH_0.1	no_N	0.52	14.04
27	N50_MESH_0.1	no_N	0.57	15.39
27	N50_MESH_0.1	no_N	0.64	17.28
27	N50_MESH_0.1	no_N	0.62	16.74
27	N50_MESH_0.1	no_N	0.53	14.31
27	N50_MESH_0.1	no_N	0.61	16.47
27	N50_MESH_0.1	no_N	0.69	18.63
27	N50_MESH_0.1	no_N	0.63	17.01
27	N50_MESH_0.1	no_N	0.65	17.55
27	N50_MESH_0.1	no_N	0.66	17.82
27	N50_MESH_0.1	no_N	0.72	19.44
27	N50_MESH_0.1	no_N	0.67	18.09
27	N50_MESH_0.1	no_N	0.71	19.17
27	N50_MESH_0.1	no_N	0.72	19.44
27	N50_MESH_0.1	no_N	0.61	16.47
27	N50_MESH_0.1	no_N	0.69	18.63
27	N50_MESH_0.1	no_N	0.69	18.63
27	N50_MESH_0.1	no_N	0.71	19.17
27	N50_MESH_0.1	no_N	0.61	16.47
27	N50_MESH_0.1	no_N	0.71	19.17
27	N50_MESH_0.1	no_N	0.6	16.2
27	N50_MESH_0.1	no_N	0.65	17.55
27	N50_MESH_0.1	no_N	0.66	17.82
27	N50_MESH_0.1	no_N	0.65	17.55
27	N50_MESH_0.1	no_N	0.72	19.44
27	N50_MESH_0.1	no_N	0.69	18.63
27	N50_MESH_0.1	no_N	0.67	18.09
27	N50_MESH_0.1	no_N	0.69	18.63
27	N50_MESH_0.1	no_N	0.69	18.63
27	N50_MESH_0.1	no_N	0.59	15.93
27	N50_MESH_0.1	no_N	0.71	19.17
27	N50_MESH_0.1	no_N	0.69	18.63
27	N50_MESH_0.1	no_N	0.62	16.74
27	N50_MESH_0.1	no_N	0.6	16.2
27	N50_MESH_0.1	no_N	0.68	18.36
27	N50_MESH_0.1	no_N	0.63	17.01
27	N50_MESH_0.1	no_N	0.56	15.12
27	N50_MESH_0.1	no_N	0.68	18.36
27	N50_MESH_0.1	no_N	0.68	18.36
27	N50_MESH_0.1	no_N	0.71	19.17
27	N50_MESH_0.1	no_N	0.69	18.63
27	N50_MESH_0.1	no_N	0.7	18.9
27	N50_MESH_0.1	no_N	0.72	19.44
27	N50_MESH_0.1	no_N	0.71	19.17
27	N50_MESH_0.1	no_N	0.73	19.71
27	N50_MESH_0.1	no_N	0.56	15.12
27	N50_MESH_0.1	no_N	0.58	15.66
27	N50_MESH_0.1	no_N	0.73	19.71
27	N50_MESH_0.1	no_N	0.65	17.55
27	N50_MESH_0.1	no_N	0.52	14.04
27	N50_MESH_0.1	no_N	0.71	19.17
27	N50_MESH_0.1	no_N	0.68	18.36
27	N50_MESH_0.1	no_N	0.59	15.93
27	N50_MESH_0.1	no_N	0.62	16.74
27	N50_MESH_0.1	no_N	0.68	18.36
27	N50_MESH_0.1	no_N	0.63	17.01
27	N50_MESH_0.1	no_N	0.71	19.17
27	N50_MESH_0.1	no_N	0.74	19.98
27	N50_MESH_0.1	no_N	0.68	18.36
27	N50_MESH_0.1	no_N	0.62	16.74
27	N50_MESH_0.1	no_N	0.75	20.25
27	N50_MESH_0.1	no_N	0.7	18.9
27	N50_MESH_0.1	no_N	0.64	17.28
27	N50_MESH_0.1	no_N	0.65	17.55
27	N50_MESH_0.1	no_N	0.74	19.98
27	N50_MESH_0.1	no_N	0.66	17.82
65	N50_MESH_0.1	no_N	0.69	44.85
65	N50_MESH_0.1	no_N	0.7	45.5
65	N50_MESH_0.1	no_N	0.69	44.85
65	N50_MESH_0.1	no_N	0.67	43.55
65	N50_MESH_0.1	no_N	0.65	42.25
65	N50_MESH_0.1	no_N	0.71	46.15
65	N50_MESH_0.1	no_N	0.65	42.25
65	N50_MESH_0.1	no_N	0.74	48.1
65	N50_MESH_0.1	no_N	0.59	38.35
65	N50_MESH_0.1	no_N	0.7	45.5
65	N50_MESH_0.1	no_N	0.59	38.35
65	N50_MESH_0.1	no_N	0.65	42.25
65	N50_MESH_0.1	no_N	0.65	42.25
65	N50_MESH_0.1	no_N	0.63	40.95
65	N50_MESH_0.1	no_N	0.66	42.9
65	N50_MESH_0.1	no_N	0.56	36.4
65	N50_MESH_0.1	no_N	0.67	43.55
65	N50_MESH_0.1	no_N	0.6	39
65	N50_MESH_0.1	no_N	0.61	39.65
65	N50_MESH_0.1	no_N	0.68	44.2
65	N50_MESH_0.1	no_N	0.57	37.05
65	N50_MESH_0.1	no_N	0.58	37.7
65	N50_MESH_0.1	no_N	0.62	40.3
65	N50_MESH_0.1	no_N	0.67	43.55
65	N50_MESH_0.1	no_N	0.64	41.6
65	N50_MESH_0.1	no_N	0.44	28.6
65	N50_MESH_0.1	no_N	0.5	32.5
65	N50_MESH_0.1	no_N	0.68	44.2
65	N50_MESH_0.1	no_N	0.64	41.6
65	N50_MESH_0.1	no_N	0.66	42.9
65	N50_MESH_0.1	no_N	0.48	31.2
65	N50_MESH_0.1	no_N	0.54	35.1
65	N50_MESH_0.1	no_N	0.59	38.35
65	N50_MESH_0.1	no_N	0.58	37.7
65	N50_MESH_0.1	no_N	0.49	31.85
65	N50_MESH_0.1	no_N	0.57	37.05
65	N50_MESH_0.1	no_N	0.64	41.6
65	N50_MESH_0.1	no_N	0.57	37.05
65	N50_MESH_0.1	no_N	0.61	39.65
65	N50_MESH_0.1	no_N	0.6	39
65	N50_MESH_0.1	no_N	0.68	44.2
65	N50_MESH_0.1	no_N	0.63	40.95
65	N50_MESH_0.1	no_N	0.68	44.2
65	N50_MESH_0.1	no_N	0.68	44.2
65	N50_MESH_0.1	no_N	0.55	35.75
65	N50_MESH_0.1	no_N	0.64	41.6
65	N50_MESH_0.1	no_N	0.65	42.25
65	N50_MESH_0.1	no_N	0.67	43.55
65	N50_MESH_0.1	no_N	0.58	37.7
65	N50_MESH_0.1	no_N	0.67	43.55
65	N50_MESH_0.1	no_N	0.56	36.4
65	N50_MESH_0.1	no_N	0.61	39.65
65	N50_MESH_0.1	no_N	0.63	40.95
65	N50_MESH_0.1	no_N	0.6	39
65	N50_MESH_0.1	no_N	0.67	43.55
65	N50_MESH_0.1	no_N	0.65	42.25
65	N50_MESH_0.1	no_N	0.61	39.65
65	N50_MESH_0.1	no_N	0.64	41.6
65	N50_MESH_0.1	no_N	0.65	42.25
65	N50_MESH_0.1	no_N	0.55	35.75
65	N50_MESH_0.1	no_N	0.68	44.2
65	N50_MESH_0.1	no_N	0.65	42.25
65	N50_MESH_0.1	no_N	0.57	37.05
65	N50_MESH_0.1	no_N	0.57	37.05
65	N50_MESH_0.1	no_N	0.64	41.6
65	N50_MESH_0.1	no_N	0.59	38.35
65	N50_MESH_0.1	no_N	0.52	33.8
65	N50_MESH_0.1	no_N	0.63	40.95
65	N50_MESH_0.1	no_N	0.63	40.95
65	N50_MESH_0.1	no_N	0.67	43.55
65	N50_MESH_0.1	no_N	0.64	41.6
65	N50_MESH_0.1	no_N	0.65	42.25
65	N50_MESH_0.1	no_N	0.68	44.2
65	N50_MESH_0.1	no_N	0.66	42.9
65	N50_MESH_0.1	no_N	0.69	44.85
65	N50_MESH_0.1	no_N	0.49	31.85
65	N50_MESH_0.1	no_N	0.53	34.45
65	N50_MESH_0.1	no_N	0.69	44.85
65	N50_MESH_0.1	no_N	0.61	39.65
65	N50_MESH_0.1	no_N	0.48	31.2
65	N50_MESH_0.1	no_N	0.66	42.9
65	N50_MESH_0.1	no_N	0.62	40.3
65	N50_MESH_0.1	no_N	0.55	35.75
65	N50_MESH_0.1	no_N	0.58	37.7
65	N50_MESH_0.1	no_N	0.65	42.25
65	N50_MESH_0.1	no_N	0.59	38.35
65	N50_MESH_0.1	no_N	0.67	43.55
65	N50_MESH_0.1	no_N	0.7	45.5
65	N50_MESH_0.1	no_N	0.65	42.25
65	N50_MESH_0.1	no_N	0.58	37.7
65	N50_MESH_0.1	no_N	0.72	46.8
65	N50_MESH_0.1	no_N	0.67	43.55
65	N50_MESH_0.1	no_N	0.6	39
65	N50_MESH_0.1	no_N	0.59	38.35
65	N50_MESH_0.1	no_N	0.69	44.85
65	N50_MESH_0.1	no_N	0.63	40.95
124	N50_MESH_0.1	no_N	0.6	74.4
124	N50_MESH_0.1	no_N	0.6	74.4
124	N50_MESH_0.1	no_N	0.6	74.4
124	N50_MESH_0.1	no_N	0.59	73.16
124	N50_MESH_0.1	no_N	0.57	70.68
124	N50_MESH_0.1	no_N	0.62	76.88
124	N50_MESH_0.1	no_N	0.57	70.68
124	N50_MESH_0.1	no_N	0.67	83.08
124	N50_MESH_0.1	no_N	0.46	57.04
124	N50_MESH_0.1	no_N	0.59	73.16
124	N50_MESH_0.1	no_N	0.51	63.24
124	N50_MESH_0.1	no_N	0.56	69.44
124	N50_MESH_0.1	no_N	0.54	66.96
124	N50_MESH_0.1	no_N	0.54	66.96
124	N50_MESH_0.1	no_N	0.54	66.96
124	N50_MESH_0.1	no_N	0.45	55.8
124	N50_MESH_0.1	no_N	0.55	68.2
124	N50_MESH_0.1	no_N	0.47	58.28
124	N50_MESH_0.1	no_N	0.52	64.48
124	N50_MESH_0.1	no_N	0.58	71.92
124	N50_MESH_0.1	no_N	0.49	60.76
124	N50_MESH_0.1	no_N	0.49	60.76
124	N50_MESH_0.1	no_N	0.5	62
124	N50_MESH_0.1	no_N	0.55	68.2
124	N50_MESH_0.1	no_N	0.53	65.72
124	N50_MESH_0.1	no_N	0.36	44.64
124	N50_MESH_0.1	no_N	0.42	52.08
124	N50_MESH_0.1	no_N	0.57	70.68
124	N50_MESH_0.1	no_N	0.55	68.2
124	N50_MESH_0.1	no_N	0.55	68.2
124	N50_MESH_0.1	no_N	0.41	50.84
124	N50_MESH_0.1	no_N	0.45	55.8
124	N50_MESH_0.1	no_N	0.49	60.76
124	N50_MESH_0.1	no_N	0.5	62
124	N50_MESH_0.1	no_N	0.4	49.6
124	N50_MESH_0.1	no_N	0.49	60.76
124	N50_MESH_0.1	no_N	0.55	68.2
124	N50_MESH_0.1	no_N	0.48	59.52
124	N50_MESH_0.1	no_N	0.5	62
124	N50_MESH_0.1	no_N	0.49	60.76
124	N50_MESH_0.1	no_N	0.59	73.16
124	N50_MESH_0.1	no_N	0.52	64.48
124	N50_MESH_0.1	no_N	0.57	70.68
124	N50_MESH_0.1	no_N	0.59	73.16
124	N50_MESH_0.1	no_N	0.44	54.56
124	N50_MESH_0.1	no_N	0.52	64.48
124	N50_MESH_0.1	no_N	0.55	68.2
124	N50_MESH_0.1	no_N	0.58	71.92
124	N50_MESH_0.1	no_N	0.5	62
124	N50_MESH_0.1	no_N	0.57	70.68
124	N50_MESH_0.1	no_N	0.48	59.52
124	N50_MESH_0.1	no_N	0.53	65.72
124	N50_MESH_0.1	no_N	0.51	63.24
124	N50_MESH_0.1	no_N	0.5	62
124	N50_MESH_0.1	no_N	0.56	69.44
124	N50_MESH_0.1	no_N	0.56	69.44
124	N50_MESH_0.1	no_N	0.5	62
124	N50_MESH_0.1	no_N	0.55	68.2
124	N50_MESH_0.1	no_N	0.53	65.72
124	N50_MESH_0.1	no_N	0.47	58.28
124	N50_MESH_0.1	no_N	0.56	69.44
124	N50_MESH_0.1	no_N	0.54	66.96
124	N50_MESH_0.1	no_N	0.45	55.8
124	N50_MESH_0.1	no_N	0.49	60.76
124	N50_MESH_0.1	no_N	0.54	66.96
124	N50_MESH_0.1	no_N	0.47	58.28
124	N50_MESH_0.1	no_N	0.44	54.56
124	N50_MESH_0.1	no_N	0.53	65.72
124	N50_MESH_0.1	no_N	0.54	66.96
124	N50_MESH_0.1	no_N	0.56	69.44
124	N50_MESH_0.1	no_N	0.54	66.96
124	N50_MESH_0.1	no_N	0.54	66.96
124	N50_MESH_0.1	no_N	0.57	70.68
124	N50_MESH_0.1	no_N	0.55	68.2
124	N50_MESH_0.1	no_N	0.58	71.92
124	N50_MESH_0.1	no_N	0.38	47.12
124	N50_MESH_0.1	no_N	0.43	53.32
124	N50_MESH_0.1	no_N	0.6	74.4
124	N50_MESH_0.1	no_N	0.52	64.48
124	N50_MESH_0.1	no_N	0.39	48.36
124	N50_MESH_0.1	no_N	0.55	68.2
124	N50_MESH_0.1	no_N	0.53	65.72
124	N50_MESH_0.1	no_N	0.46	57.04
124	N50_MESH_0.1	no_N	0.49	60.76
124	N50_MESH_0.1	no_N	0.53	65.72
124	N50_MESH_0.1	no_N	0.49	60.76
124	N50_MESH_0.1	no_N	0.57	70.68
124	N50_MESH_0.1	no_N	0.62	76.88
124	N50_MESH_0.1	no_N	0.58	71.92
124	N50_MESH_0.1	no_N	0.5	62
124	N50_MESH_0.1	no_N	0.63	78.12
124	N50_MESH_0.1	no_N	0.59	73.16
124	N50_MESH_0.1	no_N	0.5	62
124	N50_MESH_0.1	no_N	0.52	64.48
124	N50_MESH_0.1	no_N	0.6	74.4
124	N50_MESH_0.1	no_N	0.56	69.44
217	N50_MESH_0.1	no_N	0.45	97.65
217	N50_MESH_0.1	no_N	0.46	99.82
217	N50_MESH_0.1	no_N	0.45	97.65
217	N50_MESH_0.1	no_N	0.45	97.65
217	N50_MESH_0.1	no_N	0.43	93.31
217	N50_MESH_0.1	no_N	0.5	108.5
217	N50_MESH_0.1	no_N	0.44	95.48
217	N50_MESH_0.1	no_N	0.57	123.69
217	N50_MESH_0.1	no_N	0.34	73.78
217	N50_MESH_0.1	no_N	0.45	97.65
217	N50_MESH_0.1	no_N	0.42	91.14
217	N50_MESH_0.1	no_N	0.39	84.63
217	N50_MESH_0.1	no_N	0.37	80.29
217	N50_MESH_0.1	no_N	0.38	82.46
217	N50_MESH_0.1	no_N	0.38	82.46
217	N50_MESH_0.1	no_N	0.32	69.44
217	N50_MESH_0.1	no_N	0.39	84.63
217	N50_MESH_0.1	no_N	0.31	67.27
217	N50_MESH_0.1	no_N	0.36	78.12
217	N50_MESH_0.1	no_N	0.44	95.48
217	N50_MESH_0.1	no_N	0.36	78.12
217	N50_MESH_0.1	no_N	0.36	78.12
217	N50_MESH_0.1	no_N	0.35	75.95
217	N50_MESH_0.1	no_N	0.41	88.97
217	N50_MESH_0.1	no_N	0.38	82.46
217	N50_MESH_0.1	no_N	0.28	60.76
217	N50_MESH_0.1	no_N	0.34	73.78
217	N50_MESH_0.1	no_N	0.44	95.48
217	N50_MESH_0.1	no_N	0.39	84.63
217	N50_MESH_0.1	no_N	0.42	91.14
217	N50_MESH_0.1	no_N	0.32	69.44
217	N50_MESH_0.1	no_N	0.35	75.95
217	N50_MESH_0.1	no_N	0.33	71.61
217	N50_MESH_0.1	no_N	0.34	73.78
217	N50_MESH_0.1	no_N	0.3	65.1
217	N50_MESH_0.1	no_N	0.39	84.63
217	N50_MESH_0.1	no_N	0.41	88.97
217	N50_MESH_0.1	no_N	0.36	78.12
217	N50_MESH_0.1	no_N	0.37	80.29
217	N50_MESH_0.1	no_N	0.33	71.61
217	N50_MESH_0.1	no_N	0.44	95.48
217	N50_MESH_0.1	no_N	0.36	78.12
217	N50_MESH_0.1	no_N	0.42	91.14
217	N50_MESH_0.1	no_N	0.46	99.82
217	N50_MESH_0.1	no_N	0.3	65.1
217	N50_MESH_0.1	no_N	0.36	78.12
217	N50_MESH_0.1	no_N	0.4	86.8
217	N50_MESH_0.1	no_N	0.44	95.48
217	N50_MESH_0.1	no_N	0.34	73.78
217	N50_MESH_0.1	no_N	0.44	95.48
217	N50_MESH_0.1	no_N	0.36	78.12
217	N50_MESH_0.1	no_N	0.39	84.63
217	N50_MESH_0.1	no_N	0.35	75.95
217	N50_MESH_0.1	no_N	0.35	75.95
217	N50_MESH_0.1	no_N	0.41	88.97
217	N50_MESH_0.1	no_N	0.41	88.97
217	N50_MESH_0.1	no_N	0.34	73.78
217	N50_MESH_0.1	no_N	0.39	84.63
217	N50_MESH_0.1	no_N	0.37	80.29
217	N50_MESH_0.1	no_N	0.38	82.46
217	N50_MESH_0.1	no_N	0.41	88.97
217	N50_MESH_0.1	no_N	0.38	82.46
217	N50_MESH_0.1	no_N	0.3	65.1
217	N50_MESH_0.1	no_N	0.37	80.29
217	N50_MESH_0.1	no_N	0.39	84.63
217	N50_MESH_0.1	no_N	0.32	69.44
217	N50_MESH_0.1	no_N	0.32	69.44
217	N50_MESH_0.1	no_N	0.37	80.29
217	N50_MESH_0.1	no_N	0.4	86.8
217	N50_MESH_0.1	no_N	0.41	88.97
217	N50_MESH_0.1	no_N	0.37	80.29
217	N50_MESH_0.1	no_N	0.39	84.63
217	N50_MESH_0.1	no_N	0.41	88.97
217	N50_MESH_0.1	no_N	0.4	86.8
217	N50_MESH_0.1	no_N	0.41	88.97
217	N50_MESH_0.1	no_N	0.28	60.76
217	N50_MESH_0.1	no_N	0.33	71.61
217	N50_MESH_0.1	no_N	0.44	95.48
217	N50_MESH_0.1	no_N	0.38	82.46
217	N50_MESH_0.1	no_N	0.31	67.27
217	N50_MESH_0.1	no_N	0.39	84.63
217	N50_MESH_0.1	no_N	0.36	78.12
217	N50_MESH_0.1	no_N	0.33	71.61
217	N50_MESH_0.1	no_N	0.38	82.46
217	N50_MESH_0.1	no_N	0.38	82.46
217	N50_MESH_0.1	no_N	0.34	73.78
217	N50_MESH_0.1	no_N	0.44	95.48
217	N50_MESH_0.1	no_N	0.47	101.99
217	N50_MESH_0.1	no_N	0.41	88.97
217	N50_MESH_0.1	no_N	0.36	78.12
217	N50_MESH_0.1	no_N	0.5	108.5
217	N50_MESH_0.1	no_N	0.47	101.99
217	N50_MESH_0.1	no_N	0.38	82.46
217	N50_MESH_0.1	no_N	0.4	86.8
217	N50_MESH_0.1	no_N	0.46	99.82
217	N50_MESH_0.1	no_N	0.45	97.65
325	N50_MESH_0.1	no_N	0.31	100.75
325	N50_MESH_0.1	no_N	0.33	107.25
325	N50_MESH_0.1	no_N	0.32	104
325	N50_MESH_0.1	no_N	0.31	100.75
325	N50_MESH_0.1	no_N	0.29	94.25
325	N50_MESH_0.1	no_N	0.38	123.5
325	N50_MESH_0.1	no_N	0.34	110.5
325	N50_MESH_0.1	no_N	0.46	149.5
325	N50_MESH_0.1	no_N	0.26	84.5
325	N50_MESH_0.1	no_N	0.33	107.25
325	N50_MESH_0.1	no_N	0.33	107.25
325	N50_MESH_0.1	no_N	0.28	91
325	N50_MESH_0.1	no_N	0.26	84.5
325	N50_MESH_0.1	no_N	0.28	91
325	N50_MESH_0.1	no_N	0.25	81.25
325	N50_MESH_0.1	no_N	0.23	74.75
325	N50_MESH_0.1	no_N	0.28	91
325	N50_MESH_0.1	no_N	0.23	74.75
325	N50_MESH_0.1	no_N	0.23	74.75
325	N50_MESH_0.1	no_N	0.33	107.25
325	N50_MESH_0.1	no_N	0.25	81.25
325	N50_MESH_0.1	no_N	0.26	84.5
325	N50_MESH_0.1	no_N	0.23	74.75
325	N50_MESH_0.1	no_N	0.29	94.25
325	N50_MESH_0.1	no_N	0.26	84.5
325	N50_MESH_0.1	no_N	0.21	68.25
325	N50_MESH_0.1	no_N	0.23	74.75
325	N50_MESH_0.1	no_N	0.3	97.5
325	N50_MESH_0.1	no_N	0.23	74.75
325	N50_MESH_0.1	no_N	0.29	94.25
325	N50_MESH_0.1	no_N	0.24	78
325	N50_MESH_0.1	no_N	0.26	84.5
325	N50_MESH_0.1	no_N	0.23	74.75
325	N50_MESH_0.1	no_N	0.23	74.75
325	N50_MESH_0.1	no_N	0.23	74.75
325	N50_MESH_0.1	no_N	0.32	104
325	N50_MESH_0.1	no_N	0.29	94.25
325	N50_MESH_0.1	no_N	0.25	81.25
325	N50_MESH_0.1	no_N	0.24	78
325	N50_MESH_0.1	no_N	0.22	71.5
325	N50_MESH_0.1	no_N	0.33	107.25
325	N50_MESH_0.1	no_N	0.26	84.5
325	N50_MESH_0.1	no_N	0.3	97.5
325	N50_MESH_0.1	no_N	0.35	113.75
325	N50_MESH_0.1	no_N	0.23	74.75
325	N50_MESH_0.1	no_N	0.25	81.25
325	N50_MESH_0.1	no_N	0.29	94.25
325	N50_MESH_0.1	no_N	0.32	104
325	N50_MESH_0.1	no_N	0.23	74.75
325	N50_MESH_0.1	no_N	0.32	104
325	N50_MESH_0.1	no_N	0.27	87.75
325	N50_MESH_0.1	no_N	0.26	84.5
325	N50_MESH_0.1	no_N	0.24	78
325	N50_MESH_0.1	no_N	0.25	81.25
325	N50_MESH_0.1	no_N	0.3	97.5
325	N50_MESH_0.1	no_N	0.29	94.25
325	N50_MESH_0.1	no_N	0.23	74.75
325	N50_MESH_0.1	no_N	0.28	91
325	N50_MESH_0.1	no_N	0.25	81.25
325	N50_MESH_0.1	no_N	0.3	97.5
325	N50_MESH_0.1	no_N	0.28	91
325	N50_MESH_0.1	no_N	0.27	87.75
325	N50_MESH_0.1	no_N	0.21	68.25
325	N50_MESH_0.1	no_N	0.27	87.75
325	N50_MESH_0.1	no_N	0.26	84.5
325	N50_MESH_0.1	no_N	0.23	74.75
325	N50_MESH_0.1	no_N	0.24	78
325	N50_MESH_0.1	no_N	0.26	84.5
325	N50_MESH_0.1	no_N	0.27	87.75
325	N50_MESH_0.1	no_N	0.29	94.25
325	N50_MESH_0.1	no_N	0.26	84.5
325	N50_MESH_0.1	no_N	0.27	87.75
325	N50_MESH_0.1	no_N	0.29	94.25
325	N50_MESH_0.1	no_N	0.28	91
325	N50_MESH_0.1	no_N	0.29	94.25
325	N50_MESH_0.1	no_N	0.22	71.5
325	N50_MESH_0.1	no_N	0.22	71.5
325	N50_MESH_0.1	no_N	0.33	107.25
325	N50_MESH_0.1	no_N	0.25	81.25
325	N50_MESH_0.1	no_N	0.22	71.5
325	N50_MESH_0.1	no_N	0.27	87.75
325	N50_MESH_0.1	no_N	0.25	81.25
325	N50_MESH_0.1	no_N	0.23	74.75
325	N50_MESH_0.1	no_N	0.3	97.5
325	N50_MESH_0.1	no_N	0.26	84.5
325	N50_MESH_0.1	no_N	0.26	84.5
325	N50_MESH_0.1	no_N	0.33	107.25
325	N50_MESH_0.1	no_N	0.34	110.5
325	N50_MESH_0.1	no_N	0.3	97.5
325	N50_MESH_0.1	no_N	0.26	84.5
325	N50_MESH_0.1	no_N	0.36	117
325	N50_MESH_0.1	no_N	0.35	113.75
325	N50_MESH_0.1	no_N	0.26	84.5
325	N50_MESH_0.1	no_N	0.29	94.25
325	N50_MESH_0.1	no_N	0.36	117
325	N50_MESH_0.1	no_N	0.33	107.25
480	N50_MESH_0.1	no_N	0.21	100.8
480	N50_MESH_0.1	no_N	0.22	105.6
480	N50_MESH_0.1	no_N	0.23	110.4
480	N50_MESH_0.1	no_N	0.21	100.8
480	N50_MESH_0.1	no_N	0.2	96
480	N50_MESH_0.1	no_N	0.25	120
480	N50_MESH_0.1	no_N	0.22	105.6
480	N50_MESH_0.1	no_N	0.33	158.4
480	N50_MESH_0.1	no_N	0.15	72
480	N50_MESH_0.1	no_N	0.21	100.8
480	N50_MESH_0.1	no_N	0.29	139.2
480	N50_MESH_0.1	no_N	0.19	91.2
480	N50_MESH_0.1	no_N	0.17	81.6
480	N50_MESH_0.1	no_N	0.19	91.2
480	N50_MESH_0.1	no_N	0.19	91.2
480	N50_MESH_0.1	no_N	0.13	62.4
480	N50_MESH_0.1	no_N	0.19	91.2
480	N50_MESH_0.1	no_N	0.16	76.8
480	N50_MESH_0.1	no_N	0.16	76.8
480	N50_MESH_0.1	no_N	0.22	105.6
480	N50_MESH_0.1	no_N	0.17	81.6
480	N50_MESH_0.1	no_N	0.19	91.2
480	N50_MESH_0.1	no_N	0.15	72
480	N50_MESH_0.1	no_N	0.21	100.8
480	N50_MESH_0.1	no_N	0.17	81.6
480	N50_MESH_0.1	no_N	0.14	67.2
480	N50_MESH_0.1	no_N	0.18	86.4
480	N50_MESH_0.1	no_N	0.21	100.8
480	N50_MESH_0.1	no_N	0.18	86.4
480	N50_MESH_0.1	no_N	0.21	100.8
480	N50_MESH_0.1	no_N	0.16	76.8
480	N50_MESH_0.1	no_N	0.17	81.6
480	N50_MESH_0.1	no_N	0.18	86.4
480	N50_MESH_0.1	no_N	0.17	81.6
480	N50_MESH_0.1	no_N	0.15	72
480	N50_MESH_0.1	no_N	0.19	91.2
480	N50_MESH_0.1	no_N	0.24	115.2
480	N50_MESH_0.1	no_N	0.16	76.8
480	N50_MESH_0.1	no_N	0.19	91.2
480	N50_MESH_0.1	no_N	0.17	81.6
480	N50_MESH_0.1	no_N	0.22	105.6
480	N50_MESH_0.1	no_N	0.17	81.6
480	N50_MESH_0.1	no_N	0.21	100.8
[truncated: 341 more rows]
