# Supplementary material for: A guanosine tetraphosphate (ppGpp) mediated brake on photosynthesis is required for acclimation to nitrogen limitation in Arabidopsis
Source: eLife journal article supplement (doi:10.7554/elife.75041), 2022-02-14
Supplement: fig2-data1 [file Fig_2A_data.xlsx]

## Sheet: Feuil1
Line	Treatment	Fo	Fm	Fv/Fm
01_WT2	N	79.27	458.94	0.827276
01_WT2	N	87.05	505.62	0.827835
01_WT2	N	71.31	403.86	0.823429
01_WT2	N	74.6	464.89	0.839532
01_WT2	N	66.5	361.41	0.815998
01_WT2	N	76.8	452.9	0.830426
01_WT2	N	97.56	573.05	0.829753
01_WT2	N	54.24	348.48	0.844324
01_WT2	N	51.34	309.55	0.834146
01_WT2	N	74.01	442.14	0.83261
01_WT2	N	69.29	442.04	0.843249
01_WT2	N	57.93	365.33	0.841431
01_WT2	N	80.14	497.65	0.838963
01_WT2	N	84.06	531.88	0.841938
01_WT2	N	70.38	432.14	0.837159
01_WT2	N	63.72	374.92	0.830017
01_WT2	N	47.97	282.84	0.830434
01_WT2	N	46.91	273.16	0.828269
01_WT2	N	74.42	427.4	0.825877
01_WT2	N	80.89	478.64	0.830979
01_WT2	N	75.63	446.42	0.830586
01_WT2	N	71.32	446.4	0.840211
01_WT2	N	77.76	488.36	0.840773
01_WT2	N	58.09	309.35	0.812219
01_WT2	N	78.97	463.67	0.829706
01_WT2	N	78.47	506.49	0.845071
01_WT2	N	77.33	393.44	0.803452
01_WT2	N	94.33	597.26	0.842079
01_WT2	N	80.93	498.89	0.83778
01_WT2	N	86.71	486.17	0.821647
01_WT2	N	90.46	577.42	0.84332
01_WT2	N	84.9	531.8	0.840354
01_WT2	N	59.61	398.17	0.85029
01_WT2	N	88.1	506.76	0.82615
01_WT2	N	69.46	433.37	0.839721
01_WT2	N	56.3	384.32	0.853507
01_WT2	N	58.67	367.74	0.840458
01_WT2	N	71.61	452.72	0.841823
01_WT2	N	51.08	293.29	0.825838
01_WT2	N	73.83	426.26	0.826796
01_WT2	N	62.28	410.18	0.848189
01_WT2	N	86.13	461.94	0.813547
01_WT2	N	68.35	421.12	0.837695
01_WT2	N	88.74	556.48	0.840533
01_WT2	N	90.27	572.52	0.842329
01_WT2	N	73.85	382.28	0.806817
01_WT2	N	65.77	441.1	0.850895
01_WT2	N	75.59	504.6	0.850198
01_WT2	N	71.11	469.44	0.848543
01_WT2	N	56.82	389.34	0.854035
01_WT2	N	44.51	268.08	0.83393
01_WT2	N	67.56	435.32	0.844804
01_WT2	N	44.1	308.26	0.856939
01_WT2	N	85.43	544.44	0.843086
01_WT2	N	87.76	563.17	0.844168
01_WT2	N	71.11	456.89	0.844339
01_WT2	N	56.37	389.4	0.855239
01_WT2	N	85.79	543.44	0.842135
01_WT2	N	76.61	508.47	0.849313
01_WT2	N	86.44	531.45	0.837351
01_WT2	N	42.37	303.17	0.860243
01_WT2	N	81.9	536.71	0.847404
01_WT2	N	49.41	310.93	0.84109
01_WT2	N	70.6	443.4	0.840753
01_WT2	N	77.06	450.71	0.829025
01_WT2	N	82.27	538.48	0.847237
01_WT2	N	68.78	429.24	0.83974
01_WT2	N	49.68	336.58	0.852398
01_WT2	N	82.68	541.92	0.847431
01_WT2	N	70.41	346.76	0.796978
01_WT2	N	50.6	320.54	0.842141
01_WT2	N	73.6	469.66	0.84327
01_WT2	N	72.54	454.25	0.840308
01_WT2	N	45.69	319.96	0.857201
01_WT2	N	63.57	355.16	0.82101
01_WT2	N	68.73	433.11	0.841311
01_WT2	N	70.56	483.21	0.853997
01_WT2	N	71.52	400.11	0.821249
01_WT2	N	53.64	375.45	0.857131
02_rsh1-1	N	128.2	598.85	0.78594
02_rsh1-1	N	92.72	514.3	0.819716
02_rsh1-1	N	96.38	555.25	0.826439
02_rsh1-1	N	100.69	569	0.823058
02_rsh1-1	N	96.5	559.66	0.827574
02_rsh1-1	N	31.91	198.94	0.8396
02_rsh1-1	N	91.96	554.26	0.834085
02_rsh1-1	N	83.38	510.22	0.83658
02_rsh1-1	N	65.86	426.27	0.845497
02_rsh1-1	N	110.74	575.55	0.80761
02_rsh1-1	N	108.54	662.05	0.836055
02_rsh1-1	N	77.96	436.12	0.821242
02_rsh1-1	N	95.24	590.55	0.838727
02_rsh1-1	N	62.33	418.11	0.850924
02_rsh1-1	N	100.29	611.05	0.835856
02_rsh1-1	N	80.93	495.37	0.836647
02_rsh1-1	N	61.96	421.37	0.852932
02_rsh1-1	N	89.36	553.38	0.83852
02_rsh1-1	N	107.81	632.13	0.82945
02_rsh1-1	N	102.6	651.15	0.842417
02_rsh1-1	N	92.45	474.91	0.805332
02_rsh1-1	N	104.71	637.28	0.835692
02_rsh1-1	N	83.13	537.77	0.845417
02_rsh1-1	N	78.62	464.2	0.830633
02_rsh1-1	N	67.71	428.36	0.841909
02_rsh1-1	N	53.27	386.9	0.862316
02_rsh1-1	N	104.59	636.9	0.835783
02_rsh1-1	N	110.02	669.6	0.835693
02_rsh1-1	N	87.33	521.31	0.83248
02_rsh1-1	N	72.77	473.2	0.846196
02_rsh1-1	N	104.19	638.6	0.836846
02_rsh1-1	N	69.89	457.4	0.847202
02_rsh1-1	N	84.51	539.54	0.843367
02_rsh1-1	N	49.39	346.23	0.857349
02_rsh1-1	N	65.31	447.38	0.854039
02_rsh1-1	N	108.7	670.06	0.837776
02_rsh1-1	N	91.76	541.93	0.830661
02_rsh1-1	N	89.58	499.72	0.82074
02_rsh1-1	N	100.43	599.58	0.832499
02_rsh1-1	N	81.14	516.07	0.842754
02_rsh1-1	N	93.79	598.4	0.843265
02_rsh1-1	N	62.72	436.31	0.856249
02_rsh1-1	N	82.87	529.63	0.843532
02_rsh1-1	N	96.24	614.19	0.843306
02_rsh1-1	N	92.97	591.46	0.84283
02_rsh1-1	N	92.85	569.58	0.836985
02_rsh1-1	N	76.86	462.3	0.833744
02_rsh1-1	N	93.29	517.75	0.819797
02_rsh1-1	N	76.32	456.04	0.832646
02_rsh1-1	N	53.53	365.56	0.853567
02_rsh1-1	N	70.96	470.18	0.849079
02_rsh1-1	N	76.62	505.61	0.84846
02_rsh1-1	N	63.38	410.34	0.845543
02_rsh1-1	N	119.36	559.66	0.786728
02_rsh1-1	N	87.62	560.6	0.843703
02_rsh1-1	N	101.77	641.62	0.841386
02_rsh1-1	N	98.82	622.55	0.841266
02_rsh1-1	N	97.01	588.49	0.835154
02_rsh1-1	N	75.95	472.53	0.839269
02_rsh1-1	N	52.36	382.79	0.863215
02_rsh1-1	N	75.54	486.12	0.844586
02_rsh1-1	N	51.86	297.11	0.825452
02_rsh1-1	N	43.65	314.83	0.861354
02_rsh1-1	N	57.82	401.15	0.855864
02_rsh1-1	N	76.12	498.79	0.847391
02_rsh1-1	N	103.23	546.84	0.811224
02_rsh1-1	N	70.08	470.89	0.851175
02_rsh1-1	N	78.56	509.05	0.845693
02_rsh1-1	N	67.27	444.76	0.84875
02_rsh1-1	N	53.52	277.66	0.807246
02_rsh1-1	N	91.23	563.2	0.838015
02_rsh1-1	N	92.32	449.49	0.794612
02_rsh1-1	N	51.01	302.52	0.831383
02_rsh1-1	N	69.19	384.24	0.81993
03_QM	N	85.16	486.97	0.825123
03_QM	N	92.95	575.68	0.838539
03_QM	N	110.01	655.41	0.832151
03_QM	N	98.73	583.95	0.830927
03_QM	N	87.16	444.3	0.803849
03_QM	N	93.47	554.38	0.831397
03_QM	N	75.39	468.97	0.839243
03_QM	N	48	313.75	0.847012
03_QM	N	99.11	538.39	0.815914
03_QM	N	92.77	557.45	0.833564
03_QM	N	95.51	577.15	0.834514
03_QM	N	93.76	594.93	0.842402
03_QM	N	89.27	572.07	0.843953
03_QM	N	86.39	554.93	0.844341
03_QM	N	77.88	456.78	0.82948
03_QM	N	79.49	525.64	0.848775
03_QM	N	75.48	474.21	0.84083
03_QM	N	86.38	572.66	0.84916
03_QM	N	45.98	337.18	0.863634
03_QM	N	38.65	257.17	0.84971
03_QM	N	106.73	677.15	0.842384
03_QM	N	67.85	431.67	0.84282
03_QM	N	81.94	518.82	0.842065
03_QM	N	89.16	532.65	0.832611
03_QM	N	101.66	614.66	0.834591
03_QM	N	64.71	423.88	0.847339
03_QM	N	55.23	324.89	0.830004
03_QM	N	57.97	416.1	0.860683
03_QM	N	93.22	603.57	0.845552
03_QM	N	93.1	593.13	0.843036
03_QM	N	95.56	604.16	0.841847
03_QM	N	88.65	578.57	0.846777
03_QM	N	103.36	663.6	0.844259
03_QM	N	83.4	468.79	0.822095
03_QM	N	65.77	441.76	0.851141
03_QM	N	59.56	363.07	0.835982
03_QM	N	74.76	487.48	0.84666
03_QM	N	54.09	377.18	0.856594
03_QM	N	77.9	493.5	0.842128
03_QM	N	99.85	632.75	0.842197
03_QM	N	89.79	589.93	0.847796
03_QM	N	64.88	418.15	0.84484
03_QM	N	51.89	370.16	0.859817
03_QM	N	77.98	525.45	0.851594
03_QM	N	79.09	486.05	0.83728
03_QM	N	65.34	401.46	0.837244
03_QM	N	64.29	428.95	0.850122
03_QM	N	67.36	425.08	0.841536
03_QM	N	75.49	497.15	0.848154
03_QM	N	84.02	526.84	0.840521
03_QM	N	77.79	481.3	0.838375
03_QM	N	97.21	615.76	0.84213
03_QM	N	72.23	468.88	0.845952
03_QM	N	65.12	450.62	0.855488
03_QM	N	26.18	192.62	0.864085
03_QM	N	80.04	518.53	0.845641
03_QM	N	64.38	393.58	0.836425
03_QM	N	52.35	336.35	0.844359
03_QM	N	96.21	618.15	0.844358
03_QM	N	79.77	489.56	0.837058
03_QM	N	80.07	483.07	0.834227
03_QM	N	64.71	429.75	0.849424
03_QM	N	75.69	499.74	0.848541
03_QM	N	88.95	568.31	0.843483
03_QM	N	47.5	294.66	0.838797
03_QM	N	70.02	416.75	0.831986
03_QM	N	71.89	440.96	0.836969
03_QM	N	78.68	523.04	0.849572
03_QM	N	93.39	587.28	0.840979
03_QM	N	64.4	418.07	0.845935
03_QM	N	65.2	437.56	0.850992
03_QM	N	48.42	341.56	0.858268
03_QM	N	69.76	475.27	0.85322
03_QM	N	85.08	548.65	0.844928
03_QM	N	44.76	303.51	0.852525
01_WT2	No_N	668.98	1021.8	0.345293
01_WT2	No_N	321.96	1365.64	0.764242
01_WT2	No_N	506.52	1161.65	0.563965
01_WT2	No_N	343.03	1427.94	0.759773
01_WT2	No_N	322.99	1371.79	0.764549
01_WT2	No_N	508.96	804.9	0.367673
01_WT2	No_N	304.35	1126.29	0.729777
01_WT2	No_N	327.02	585.84	0.441776
01_WT2	No_N	286.49	515.78	0.44455
01_WT2	No_N	629.36	939.81	0.330333
01_WT2	No_N	333.71	1321.09	0.747406
01_WT2	No_N	405.13	1231.63	0.671062
01_WT2	No_N	409.75	1171.19	0.650142
01_WT2	No_N	319.47	1349.96	0.763341
01_WT2	No_N	311.87	1295.27	0.759224
01_WT2	No_N	553.94	771.54	0.282033
01_WT2	No_N	261.2	888.32	0.705962
01_WT2	No_N	330.79	804.88	0.589019
01_WT2	No_N	262.23	652.31	0.597998
01_WT2	No_N	335.34	725.06	0.5375
01_WT2	No_N	789.55	987.22	0.200229
01_WT2	No_N	566.36	997.46	0.432198
01_WT2	No_N	459.07	899.41	0.489577
01_WT2	No_N	518.39	798.04	0.350421
01_WT2	No_N	513.37	819.7	0.373698
01_WT2	No_N	266.66	1064.89	0.749599
01_WT2	No_N	318.42	823.45	0.61331
01_WT2	No_N	262.99	1121.5	0.765502
01_WT2	No_N	214.42	972.14	0.779425
01_WT2	No_N	286.68	1285.54	0.776996
01_WT2	No_N	368.5	1445.34	0.745043
01_WT2	No_N	363.51	1052.09	0.654488
01_WT2	No_N	330.51	508.44	0.349953
01_WT2	No_N	342.1	1367.12	0.749759
01_WT2	No_N	254.07	381.79	0.334556
01_WT2	No_N	315.51	1292.37	0.755867
01_WT2	No_N	360.65	670.84	0.46239
01_WT2	No_N	140.16	532.91	0.73701
01_WT2	No_N	248.89	748.83	0.667628
01_WT2	No_N	324.5	618.88	0.475666
01_WT2	No_N	250.29	504.06	0.503452
01_WT2	No_N	307.03	1038.53	0.704361
01_WT2	No_N	343.44	1352.66	0.7461
01_WT2	No_N	496.99	984.68	0.495278
01_WT2	No_N	309.16	1263.03	0.755224
01_WT2	No_N	399.78	922.35	0.566553
01_WT2	No_N	263.61	1092.75	0.758765
01_WT2	No_N	351.86	782.02	0.550063
01_WT2	No_N	411.41	952.89	0.56825
01_WT2	No_N	465.21	862.38	0.460539
01_WT2	No_N	383.56	1157.08	0.66851
01_WT2	No_N	356.42	1385.62	0.742772
01_WT2	No_N	526.89	687.6	0.233711
01_WT2	No_N	298.71	1059.15	0.717972
01_WT2	No_N	485.98	744.99	0.347683
01_WT2	No_N	289.37	998.1	0.710079
01_WT2	No_N	271.36	1169.37	0.767943
01_WT2	No_N	225.11	1005.59	0.776141
01_WT2	No_N	304.74	1290.76	0.763907
01_WT2	No_N	453.63	815.76	0.443917
01_WT2	No_N	552.85	908.29	0.391329
01_WT2	No_N	308.99	859.07	0.64032
01_WT2	No_N	368.04	531.23	0.307212
01_WT2	No_N	245.13	852.72	0.712532
01_WT2	No_N	312.82	1318.17	0.762679
01_WT2	No_N	296.84	1247.84	0.762125
01_WT2	No_N	267.09	1174.32	0.772558
01_WT2	No_N	390.61	924.04	0.577291
01_WT2	No_N	292.9	1009.78	0.709937
01_WT2	No_N	350.99	953.67	0.631959
01_WT2	No_N	508.5	1069.07	0.524353
01_WT2	No_N	336.33	876.94	0.616473
01_WT2	No_N	371.07	742.28	0.500108
01_WT2	No_N	312.07	1299.29	0.759815
01_WT2	No_N	355.81	1115.54	0.681042
01_WT2	No_N	284.54	1089.41	0.738804
01_WT2	No_N	329.31	504.41	0.347138
01_WT2	No_N	227.91	932.44	0.755577
01_WT2	No_N	400.61	1063.03	0.623143
01_WT2	No_N	316.28	845.62	0.625979
01_WT2	No_N	282.56	1010.44	0.720369
01_WT2	No_N	279.47	894.93	0.687719
01_WT2	No_N	335.23	1326.18	0.747221
01_WT2	No_N	432.95	1099.33	0.606169
01_WT2	No_N	294.49	1222.04	0.75901
01_WT2	No_N	315.02	905.07	0.651939
01_WT2	No_N	262.12	1111.33	0.764129
01_WT2	No_N	218.53	969.45	0.774584
01_WT2	No_N	197.35	717.34	0.724872
01_WT2	No_N	378.08	572.38	0.33946
01_WT2	No_N	263.7	1123.1	0.765203
01_WT2	No_N	315.37	1236.6	0.74497
01_WT2	No_N	337.48	751.04	0.550663
01_WT2	No_N	310.8	1348.1	0.769453
01_WT2	No_N	587.36	986.04	0.404324
01_WT2	No_N	594.88	1065.72	0.441805
01_WT2	No_N	326.64	1070.87	0.694977
01_WT2	No_N	257.59	1130.86	0.772226
02_rsh1-1	No_N	759.43	1056	0.280843
02_rsh1-1	No_N	718.55	784.84	0.0844631
02_rsh1-1	No_N	648.01	1009.01	0.357776
02_rsh1-1	No_N	1064.42	1445.91	0.263841
02_rsh1-1	No_N	913.78	1002.89	0.0888632
02_rsh1-1	No_N	787.54	1123.13	0.298799
02_rsh1-1	No_N	1000.81	1196.21	0.163349
02_rsh1-1	No_N	476.78	1265.94	0.623379
02_rsh1-1	No_N	594.27	1183.23	0.497756
02_rsh1-1	No_N	438.48	814.68	0.461776
02_rsh1-1	No_N	646.71	1320.01	0.510072
02_rsh1-1	No_N	522.32	1200.37	0.564859
02_rsh1-1	No_N	789.39	1083.77	0.271626
02_rsh1-1	No_N	714.2	1271.49	0.438297
02_rsh1-1	No_N	728.66	1270.01	0.426264
02_rsh1-1	No_N	607.11	666.13	0.0886013
02_rsh1-1	No_N	613.67	1251.28	0.509558
02_rsh1-1	No_N	595.84	1238.4	0.518871
02_rsh1-1	No_N	532.38	1230.39	0.567316
02_rsh1-1	No_N	387.4	1097.58	0.647042
02_rsh1-1	No_N	491.51	1316.64	0.626694
02_rsh1-1	No_N	541.04	1319.25	0.589888
02_rsh1-1	No_N	897.78	1215.57	0.261433
02_rsh1-1	No_N	1010.93	1223.11	0.173476
02_rsh1-1	No_N	599.9	1245.01	0.518156
02_rsh1-1	No_N	626.19	1241.1	0.495456
02_rsh1-1	No_N	888.49	1082.95	0.179565
02_rsh1-1	No_N	681.63	743.68	0.0834364
02_rsh1-1	No_N	600.48	862.69	0.303945
02_rsh1-1	No_N	807.39	905.62	0.108467
02_rsh1-1	No_N	680.97	759.7	0.103633
02_rsh1-1	No_N	612.67	1306.78	0.531168
02_rsh1-1	No_N	571.84	640.52	0.107225
02_rsh1-1	No_N	512.56	588.65	0.129262
02_rsh1-1	No_N	494.11	698.63	0.292744
02_rsh1-1	No_N	547.27	602.29	0.0913513
02_rsh1-1	No_N	502.46	779.47	0.355383
02_rsh1-1	No_N	679.16	1166.27	0.417665
02_rsh1-1	No_N	449	1148.04	0.608907
02_rsh1-1	No_N	567.89	1311.51	0.567003
02_rsh1-1	No_N	903.71	1273.29	0.290256
02_rsh1-1	No_N	641.68	1299.57	0.506237
02_rsh1-1	No_N	640.47	1278.06	0.498873
02_rsh1-1	No_N	585.91	1274.33	0.540221
02_rsh1-1	No_N	440.84	488.92	0.0983187
02_rsh1-1	No_N	405.76	448.42	0.0951563
02_rsh1-1	No_N	708.62	739.14	0.0412912
02_rsh1-1	No_N	867.69	1211.54	0.283812
02_rsh1-1	No_N	419.58	1123.51	0.626536
02_rsh1-1	No_N	609.84	1354.74	0.549847
02_rsh1-1	No_N	686.43	1090.06	0.370282
02_rsh1-1	No_N	732.61	1005.32	0.271267
02_rsh1-1	No_N	551.38	619.58	0.110058
02_rsh1-1	No_N	630.04	1306.38	0.517721
02_rsh1-1	No_N	555.03	606.54	0.0849243
02_rsh1-1	No_N	555.54	803.14	0.30829
02_rsh1-1	No_N	605.64	1259.99	0.51933
02_rsh1-1	No_N	549.87	606.64	0.093581
02_rsh1-1	No_N	605.64	684.3	0.114964
02_rsh1-1	No_N	619.3	1232.29	0.497432
02_rsh1-1	No_N	637.91	691.85	0.0779649
02_rsh1-1	No_N	670.72	799.48	0.161055
02_rsh1-1	No_N	792.24	1053.64	0.248092
02_rsh1-1	No_N	973.78	1194.01	0.184446
02_rsh1-1	No_N	463.44	725.65	0.361345
02_rsh1-1	No_N	405.9	456.78	0.111367
02_rsh1-1	No_N	872.52	1214.97	0.281851
02_rsh1-1	No_N	573.24	1229.71	0.533841
02_rsh1-1	No_N	375.19	1104.5	0.660308
02_rsh1-1	No_N	728.03	792.09	0.0808873
02_rsh1-1	No_N	960.86	1222.7	0.214157
02_rsh1-1	No_N	403.58	442.73	0.0884286
02_rsh1-1	No_N	1021	1221.79	0.164341
02_rsh1-1	No_N	685.15	765.96	0.105502
02_rsh1-1	No_N	533.19	610.06	0.126004
02_rsh1-1	No_N	541.64	606.45	0.106868
02_rsh1-1	No_N	608.73	977.77	0.37743
02_rsh1-1	No_N	755.35	860.77	0.122472
02_rsh1-1	No_N	371.17	455.03	0.184296
02_rsh1-1	No_N	738.45	797.45	0.0739858
02_rsh1-1	No_N	656.42	1135.41	0.421865
02_rsh1-1	No_N	578.86	630.38	0.0817126
02_rsh1-1	No_N	992.63	1065.81	0.0686614
02_rsh1-1	No_N	727.36	1045.62	0.304374
02_rsh1-1	No_N	751.69	849.22	0.114847
02_rsh1-1	No_N	644.45	1190.35	0.458605
02_rsh1-1	No_N	620.5	1207.68	0.486213
02_rsh1-1	No_N	611.64	1024.23	0.402829
02_rsh1-1	No_N	704.08	1103.25	0.361813
02_rsh1-1	No_N	581.31	648.06	0.102984
02_rsh1-1	No_N	727.73	820.89	0.113487
02_rsh1-1	No_N	735.83	1306.66	0.436862
02_rsh1-1	No_N	550.25	599.21	0.0817243
02_rsh1-1	No_N	659.06	715.55	0.0789463
02_rsh1-1	No_N	763.91	1211.67	0.36954
02_rsh1-1	No_N	615.42	951.48	0.353197
02_rsh1-1	No_N	771.48	1147.7	0.327803
02_rsh1-1	No_N	511.41	583.13	0.122991
02_rsh1-1	No_N	434.92	609.58	0.286525
03_QM	No_N	150.73	690.28	0.781639
03_QM	No_N	269.01	862.59	0.688137
03_QM	No_N	188.96	711.78	0.734525
03_QM	No_N	133.08	481.94	0.723866
03_QM	No_N	187.36	735.99	0.745445
03_QM	No_N	237.16	807.17	0.706171
03_QM	No_N	126.68	537.48	0.764308
03_QM	No_N	110.2	497.26	0.778386
03_QM	No_N	127.27	532.03	0.760784
03_QM	No_N	243.49	838.48	0.709605
03_QM	No_N	205.33	838.45	0.755108
03_QM	No_N	180.17	447.74	0.597579
03_QM	No_N	161.31	681.75	0.763388
03_QM	No_N	158.53	596.49	0.734229
03_QM	No_N	157.94	669.07	0.763941
03_QM	No_N	148.75	515.53	0.711462
03_QM	No_N	120.87	556.38	0.782756
03_QM	No_N	140.7	764.7	0.815993
03_QM	No_N	193.28	949.09	0.796352
03_QM	No_N	216.7	925.39	0.765839
03_QM	No_N	249.69	969.86	0.74254
03_QM	No_N	223.34	798.83	0.720416
03_QM	No_N	366.36	1078.21	0.660215
03_QM	No_N	178.81	881.94	0.797254
03_QM	No_N	258.74	1245.64	0.792292
03_QM	No_N	257.08	1198.87	0.785565
03_QM	No_N	89.33	438.94	0.796487
03_QM	No_N	154.71	804.41	0.807673
03_QM	No_N	128.61	684.79	0.812191
03_QM	No_N	210.52	919.78	0.771119
03_QM	No_N	204.01	791.18	0.742145
03_QM	No_N	145.57	767.62	0.810362
03_QM	No_N	325.29	1157.15	0.718887
03_QM	No_N	166.72	753.05	0.778594
03_QM	No_N	179.78	905.1	0.80137
03_QM	No_N	146.64	641.07	0.771257
03_QM	No_N	259.33	1158.29	0.77611
03_QM	No_N	285.74	1136	0.748468
03_QM	No_N	141.89	698.38	0.79683
03_QM	No_N	177.97	926.71	0.807955
03_QM	No_N	244.73	1091.49	0.775793
03_QM	No_N	156.04	639	0.755806
03_QM	No_N	99.87	477.46	0.790831
03_QM	No_N	204.65	1021.88	0.799732
03_QM	No_N	159.22	687.07	0.768262
03_QM	No_N	143.68	716.58	0.799506
03_QM	No_N	211.36	860.09	0.754258
03_QM	No_N	290.49	1063.18	0.726773
03_QM	No_N	165.72	844.79	0.803833
03_QM	No_N	248.9	916.94	0.728554
03_QM	No_N	258.77	1135.78	0.772165
03_QM	No_N	140.91	681.13	0.793123
03_QM	No_N	143.6	606.13	0.763087
03_QM	No_N	109.25	497.42	0.780367
03_QM	No_N	105.74	476.14	0.777922
03_QM	No_N	110.18	488.61	0.774524
03_QM	No_N	96.25	477.29	0.798362
03_QM	No_N	260.59	1081.56	0.75907
03_QM	No_N	267.22	1067.86	0.749761
03_QM	No_N	183.05	870.15	0.789634
03_QM	No_N	236.56	949.91	0.750966
03_QM	No_N	201.18	999.71	0.798762
03_QM	No_N	163.39	803.12	0.796556
03_QM	No_N	231.27	1122.33	0.793929
03_QM	No_N	86.02	400.13	0.78502
03_QM	No_N	275.56	1237.51	0.777335
03_QM	No_N	177.4	885.42	0.799643
03_QM	No_N	165.26	712.21	0.767962
03_QM	No_N	138.17	639.6	0.783974
03_QM	No_N	125.88	555.67	0.773463
03_QM	No_N	273.56	1012.82	0.729913
03_QM	No_N	224.36	949.39	0.76368
03_QM	No_N	133.52	582.85	0.770919
03_QM	No_N	186.18	749.57	0.751618
03_QM	No_N	181.7	555.64	0.673008
03_QM	No_N	285.66	1112.8	0.743296
03_QM	No_N	144.25	635.62	0.77304
03_QM	No_N	250.05	1056.31	0.76328
03_QM	No_N	166.84	668.45	0.750408
03_QM	No_N	138.07	576.8	0.760628
03_QM	No_N	216.62	1009.18	0.78535
03_QM	No_N	211.5	873	0.757732
03_QM	No_N	230.05	630.54	0.635154
03_QM	No_N	141.39	590.72	0.760648
03_QM	No_N	147.69	472.05	0.687131
03_QM	No_N	254.35	1064.36	0.76103
03_QM	No_N	169.92	834.37	0.796361
03_QM	No_N	198.8	626.15	0.682504
03_QM	No_N	220.42	837.43	0.736778
03_QM	No_N	103.65	531.28	0.804905
03_QM	No_N	257.81	972.6	0.734927
03_QM	No_N	192.77	853.71	0.774197
03_QM	No_N	240.53	1128.02	0.786768
03_QM	No_N	158.39	789.69	0.799428
03_QM	No_N	133.17	745.2	0.82131
03_QM	No_N	156.65	666.89	0.765119
03_QM	No_N	86.58	452.64	0.808722
03_QM	No_N	125.29	594.52	0.789259
03_QM	No_N	203.67	931.64	0.781386
03_QM	No_N	165.31	728.42	0.773057
