# Supplementary material for: A guanosine tetraphosphate (ppGpp) mediated brake on photosynthesis is required for acclimation to nitrogen limitation in Arabidopsis
Source: eLife journal article supplement (doi:10.7554/elife.75041), 2022-02-14
Supplement: fig2-data1 [file Fig_2C_data.xlsx]

## Sheet: +N
Light	Line	QY	ETR
27	01_qrt	0.718642	19.4033
27	01_qrt	0.71456	19.2931
27	01_qrt	0.694413	18.7492
27	01_qrt	0.696656	18.8097
27	01_qrt	0.711382	19.2073
27	01_qrt	0.714892	19.3021
27	01_qrt	0.716223	19.338
27	01_qrt	0.704325	19.0168
27	01_qrt	0.727706	19.6481
27	01_qrt	0.735234	19.8513
27	01_qrt	0.708364	19.1258
27	01_qrt	0.734834	19.8405
27	01_qrt	0.737735	19.9189
27	01_qrt	0.728046	19.6573
27	01_qrt	0.738308	19.9343
27	01_qrt	0.744813	20.11
27	01_qrt	0.741413	20.0182
27	01_qrt	0.726466	19.6146
27	01_qrt	0.705522	19.0491
27	01_qrt	0.740035	19.9809
27	01_qrt	0.689892	18.6271
27	01_qrt	0.687717	18.5684
27	01_qrt	0.743403	20.0719
27	01_qrt	0.70228	18.9616
27	01_qrt	0.722473	19.5068
27	01_qrt	0.705012	19.0353
27	01_qrt	0.695362	18.7748
27	01_qrt	0.707949	19.1146
27	01_qrt	0.705006	19.0352
27	01_qrt	0.659267	17.8002
27	01_qrt	0.704174	19.0127
27	01_qrt	0.702238	18.9604
27	01_qrt	0.698811	18.8679
27	01_qrt	0.729024	19.6836
27	01_qrt	0.74572	20.1344
27	01_qrt	0.725418	19.5863
27	01_qrt	0.751286	20.2847
27	01_qrt	0.735416	19.8562
27	01_qrt	0.745008	20.1152
27	01_qrt	0.677721	18.2985
27	01_qrt	0.756073	20.414
27	01_qrt	0.728419	19.6673
27	01_qrt	0.70768	19.1074
27	01_qrt	0.758823	20.4882
27	01_qrt	0.756202	20.4174
27	01_qrt	0.709027	19.1437
27	01_qrt	0.733879	19.8147
27	01_qrt	0.702639	18.9713
27	01_qrt	0.70221	18.9597
27	01_qrt	0.738574	19.9415
27	01_qrt	0.68638	18.5323
27	01_qrt	0.766152	20.6861
27	01_qrt	0.693008	18.7112
27	01_qrt	0.757109	20.4419
27	01_qrt	0.700908	18.9245
27	01_qrt	0.757903	20.4634
27	01_qrt	0.713724	19.2705
27	01_qrt	0.751146	20.2809
27	01_qrt	0.672459	18.1564
27	01_qrt	0.757074	20.441
27	01_qrt	0.69042	18.6413
27	01_qrt	0.700535	18.9144
27	01_qrt	0.661433	17.8587
27	01_qrt	0.686726	18.5416
27	01_qrt	0.763224	20.607
27	01_qrt	0.720274	19.4474
27	01_qrt	0.724984	19.5746
27	01_qrt	0.680053	18.3614
27	01_qrt	0.721684	19.4855
27	01_qrt	0.751587	20.2928
27	01_qrt	0.750949	20.2756
27	01_qrt	0.738314	19.9345
27	01_qrt	0.737823	19.9212
27	01_qrt	0.752864	20.3273
27	01_qrt	0.723204	19.5265
27	01_qrt	0.718748	19.4062
27	01_qrt	0.694073	18.74
27	01_qrt	0.665639	17.9722
27	01_qrt	0.740705	19.999
27	01_qrt	0.747558	20.1841
27	01_qrt	0.758736	20.4859
27	01_qrt	0.754322	20.3667
27	01_qrt	0.700378	18.9102
27	01_qrt	0.704415	19.0192
27	01_qrt	0.748305	20.2042
27	01_qrt	0.705414	19.0462
27	01_qrt	0.709544	19.1577
27	01_qrt	0.692051	18.6854
27	01_qrt	0.694394	18.7486
27	01_qrt	0.747095	20.1716
27	01_qrt	0.696642	18.8093
27	01_qrt	0.679454	18.3453
27	01_qrt	0.71191	19.2216
27	01_qrt	0.700664	18.9179
27	01_qrt	0.741163	20.0114
27	01_qrt	0.713486	19.2641
27	01_qrt	0.737864	19.9223
27	01_qrt	0.750348	20.2594
27	01_qrt	0.76562	20.6717
27	01_qrt	0.723457	19.5333
27	01_qrt	0.723832	19.5435
27	01_qrt	0.699861	18.8962
27	01_qrt	0.755693	20.4037
27	01_qrt	0.763489	20.6142
27	01_qrt	0.754267	20.3652
27	01_qrt	0.764012	20.6283
27	01_qrt	0.767329	20.7179
27	01_qrt	0.752336	20.3131
27	01_qrt	0.771168	20.8215
27	01_qrt	0.682481	18.427
27	01_qrt	0.723825	19.5433
27	01_qrt	0.766329	20.6909
27	01_qrt	0.755014	20.3854
27	01_qrt	0.732899	19.7883
27	01_qrt	0.740104	19.9828
27	01_qrt	0.778185	21.011
27	01_qrt	0.754821	20.3802
27	01_qrt	0.725047	19.5763
65	01_qrt	0.700345	45.5224
65	01_qrt	0.68799	44.7193
65	01_qrt	0.679553	44.1709
65	01_qrt	0.673045	43.7479
65	01_qrt	0.690911	44.9092
65	01_qrt	0.687271	44.6726
65	01_qrt	0.702752	45.6789
65	01_qrt	0.686018	44.5912
65	01_qrt	0.716289	46.5588
65	01_qrt	0.716027	46.5418
65	01_qrt	0.686781	44.6408
65	01_qrt	0.711719	46.2617
65	01_qrt	0.71971	46.7812
65	01_qrt	0.71677	46.5901
65	01_qrt	0.721911	46.9242
65	01_qrt	0.726093	47.196
65	01_qrt	0.725073	47.1298
65	01_qrt	0.698757	45.4192
65	01_qrt	0.685163	44.5356
65	01_qrt	0.716583	46.5779
65	01_qrt	0.670036	43.5523
65	01_qrt	0.649409	42.2116
65	01_qrt	0.709797	46.1368
65	01_qrt	0.675969	43.938
65	01_qrt	0.697171	45.3161
65	01_qrt	0.676389	43.9653
65	01_qrt	0.66303	43.097
65	01_qrt	0.685436	44.5534
65	01_qrt	0.671588	43.6532
65	01_qrt	0.596942	38.8012
65	01_qrt	0.669534	43.5197
65	01_qrt	0.660533	42.9346
65	01_qrt	0.671694	43.6601
65	01_qrt	0.688811	44.7727
65	01_qrt	0.732339	47.602
65	01_qrt	0.699761	45.4844
65	01_qrt	0.733674	47.6888
65	01_qrt	0.721259	46.8818
65	01_qrt	0.72058	46.8377
65	01_qrt	0.654838	42.5645
65	01_qrt	0.74132	48.1858
65	01_qrt	0.705549	45.8607
65	01_qrt	0.691712	44.9613
65	01_qrt	0.743432	48.3231
65	01_qrt	0.731508	47.548
65	01_qrt	0.68391	44.4542
65	01_qrt	0.718042	46.6727
65	01_qrt	0.681919	44.3248
65	01_qrt	0.664038	43.1625
65	01_qrt	0.716003	46.5402
65	01_qrt	0.6631	43.1015
65	01_qrt	0.746413	48.5169
65	01_qrt	0.652885	42.4376
65	01_qrt	0.73737	47.929
65	01_qrt	0.681323	44.286
65	01_qrt	0.737259	47.9218
65	01_qrt	0.698125	45.3781
65	01_qrt	0.72726	47.2719
65	01_qrt	0.665154	43.235
65	01_qrt	0.735417	47.8021
65	01_qrt	0.668156	43.4301
65	01_qrt	0.680587	44.2382
65	01_qrt	0.595926	38.7352
65	01_qrt	0.61648	40.0712
65	01_qrt	0.741197	48.1778
65	01_qrt	0.671188	43.6272
65	01_qrt	0.692333	45.0016
65	01_qrt	0.664155	43.1701
65	01_qrt	0.677258	44.0218
65	01_qrt	0.732898	47.6384
65	01_qrt	0.73026	47.4669
65	01_qrt	0.714228	46.4248
65	01_qrt	0.710171	46.1611
65	01_qrt	0.736566	47.8768
65	01_qrt	0.705403	45.8512
65	01_qrt	0.702748	45.6787
65	01_qrt	0.669655	43.5276
65	01_qrt	0.651388	42.3402
65	01_qrt	0.72749	47.2868
65	01_qrt	0.710027	46.1518
65	01_qrt	0.740712	48.1463
65	01_qrt	0.73626	47.8569
65	01_qrt	0.667518	43.3887
65	01_qrt	0.68001	44.2006
65	01_qrt	0.730225	47.4646
65	01_qrt	0.68254	44.3651
65	01_qrt	0.673247	43.7611
65	01_qrt	0.669387	43.5102
65	01_qrt	0.664021	43.1614
65	01_qrt	0.718796	46.7217
65	01_qrt	0.684211	44.4737
65	01_qrt	0.658136	42.7788
65	01_qrt	0.685603	44.5642
65	01_qrt	0.67443	43.8379
65	01_qrt	0.720568	46.8369
65	01_qrt	0.693408	45.0715
65	01_qrt	0.721942	46.9262
65	01_qrt	0.73361	47.6846
65	01_qrt	0.746369	48.514
65	01_qrt	0.706205	45.9033
65	01_qrt	0.715584	46.513
65	01_qrt	0.66804	43.4226
65	01_qrt	0.726156	47.2001
65	01_qrt	0.766513	49.8234
65	01_qrt	0.738987	48.0341
65	01_qrt	0.748618	48.6602
65	01_qrt	0.751898	48.8734
65	01_qrt	0.730616	47.49
65	01_qrt	0.752392	48.9055
65	01_qrt	0.655402	42.6012
65	01_qrt	0.711793	46.2666
65	01_qrt	0.75012	48.7578
65	01_qrt	0.731463	47.5451
65	01_qrt	0.721586	46.9031
65	01_qrt	0.739233	48.0501
65	01_qrt	0.792866	51.5363
65	01_qrt	0.734264	47.7271
65	01_qrt	0.715053	46.4784
124	01_qrt	0.614101	76.1486
124	01_qrt	0.644807	79.9561
124	01_qrt	0.627098	77.7602
124	01_qrt	0.615969	76.3801
124	01_qrt	0.638999	79.2359
124	01_qrt	0.628422	77.9243
124	01_qrt	0.65947	81.7742
124	01_qrt	0.645207	80.0056
124	01_qrt	0.672462	83.3853
124	01_qrt	0.654915	81.2095
124	01_qrt	0.615778	76.3564
124	01_qrt	0.664769	82.4313
124	01_qrt	0.673179	83.4742
124	01_qrt	0.663131	82.2282
124	01_qrt	0.684091	84.8273
124	01_qrt	0.687691	85.2737
124	01_qrt	0.685768	85.0352
124	01_qrt	0.649603	80.5507
124	01_qrt	0.625109	77.5135
124	01_qrt	0.662106	82.1012
124	01_qrt	0.613218	76.039
124	01_qrt	0.575144	71.3178
124	01_qrt	0.660105	81.853
124	01_qrt	0.614957	76.2547
124	01_qrt	0.645494	80.0412
124	01_qrt	0.59303	73.5358
124	01_qrt	0.597192	74.0518
124	01_qrt	0.630865	78.2273
124	01_qrt	0.600021	74.4026
124	01_qrt	0.484582	60.0882
124	01_qrt	0.606253	75.1753
124	01_qrt	0.593045	73.5375
124	01_qrt	0.612192	75.9118
124	01_qrt	0.615843	76.3645
124	01_qrt	0.683674	84.7756
124	01_qrt	0.650807	80.7001
124	01_qrt	0.682498	84.6298
124	01_qrt	0.673536	83.5185
124	01_qrt	0.677556	84.0169
124	01_qrt	0.600704	74.4873
124	01_qrt	0.692287	85.8436
124	01_qrt	0.66046	81.897
124	01_qrt	0.629489	78.0566
124	01_qrt	0.703543	87.2394
124	01_qrt	0.694553	86.1246
124	01_qrt	0.632604	78.4429
124	01_qrt	0.662788	82.1857
124	01_qrt	0.624465	77.4336
124	01_qrt	0.575084	71.3104
124	01_qrt	0.682797	84.6668
124	01_qrt	0.606419	75.196
124	01_qrt	0.706278	87.5785
124	01_qrt	0.555569	68.8906
124	01_qrt	0.687805	85.2879
124	01_qrt	0.61626	76.4163
124	01_qrt	0.696619	86.3808
124	01_qrt	0.649693	80.5619
124	01_qrt	0.683894	84.8029
124	01_qrt	0.571026	70.8072
124	01_qrt	0.698015	86.5538
124	01_qrt	0.602568	74.7185
124	01_qrt	0.621432	77.0575
124	01_qrt	0.497217	61.6549
124	01_qrt	0.562266	69.721
124	01_qrt	0.681616	84.5204
124	01_qrt	0.612452	75.944
124	01_qrt	0.627324	77.7882
124	01_qrt	0.608298	75.4289
124	01_qrt	0.632822	78.4699
124	01_qrt	0.683028	84.6955
124	01_qrt	0.685902	85.0518
124	01_qrt	0.665353	82.5037
124	01_qrt	0.627872	77.8561
124	01_qrt	0.694381	86.1033
124	01_qrt	0.648278	80.3864
124	01_qrt	0.650461	80.6572
124	01_qrt	0.605517	75.0841
124	01_qrt	0.590325	73.2003
124	01_qrt	0.677124	83.9633
124	01_qrt	0.603144	74.7899
124	01_qrt	0.694986	86.1783
124	01_qrt	0.690792	85.6582
124	01_qrt	0.600524	74.4649
124	01_qrt	0.633653	78.5729
124	01_qrt	0.680956	84.4385
124	01_qrt	0.627694	77.8341
124	01_qrt	0.615643	76.3397
124	01_qrt	0.602069	74.6566
124	01_qrt	0.585012	72.5415
124	01_qrt	0.663245	82.2424
124	01_qrt	0.617124	76.5233
124	01_qrt	0.601864	74.6312
124	01_qrt	0.625955	77.6184
124	01_qrt	0.612041	75.8931
124	01_qrt	0.649952	80.5941
124	01_qrt	0.631509	78.3072
124	01_qrt	0.680834	84.4234
124	01_qrt	0.687996	85.3115
124	01_qrt	0.695887	86.29
124	01_qrt	0.638243	79.1422
124	01_qrt	0.6434	79.7816
124	01_qrt	0.602764	74.7428
124	01_qrt	0.615589	76.3331
124	01_qrt	0.705535	87.4863
124	01_qrt	0.689598	85.5102
124	01_qrt	0.705558	87.4892
124	01_qrt	0.705935	87.5359
124	01_qrt	0.694871	86.164
124	01_qrt	0.715714	88.7485
124	01_qrt	0.607727	75.3581
124	01_qrt	0.64952	80.5404
124	01_qrt	0.705081	87.43
124	01_qrt	0.700409	86.8508
124	01_qrt	0.647417	80.2797
124	01_qrt	0.696622	86.3811
124	01_qrt	0.736582	91.3362
124	01_qrt	0.690925	85.6747
124	01_qrt	0.659782	81.813
217	01_qrt	0.556954	120.859
217	01_qrt	0.566499	122.93
217	01_qrt	0.554593	120.347
217	01_qrt	0.53028	115.071
217	01_qrt	0.571895	124.101
217	01_qrt	0.551544	119.685
217	01_qrt	0.58505	126.956
217	01_qrt	0.556059	120.665
217	01_qrt	0.601951	130.623
217	01_qrt	0.562969	122.164
217	01_qrt	0.505387	109.669
217	01_qrt	0.594941	129.102
217	01_qrt	0.609878	132.344
217	01_qrt	0.609816	132.33
217	01_qrt	0.610133	132.399
217	01_qrt	0.620614	134.673
217	01_qrt	0.614338	133.311
217	01_qrt	0.579888	125.836
217	01_qrt	0.544397	118.134
217	01_qrt	0.573523	124.454
217	01_qrt	0.510958	110.878
217	01_qrt	0.466939	101.326
217	01_qrt	0.573781	124.511
217	01_qrt	0.517099	112.211
217	01_qrt	0.571784	124.077
217	01_qrt	0.490849	106.514
217	01_qrt	0.498533	108.182
217	01_qrt	0.544088	118.067
217	01_qrt	0.480703	104.313
217	01_qrt	0.360363	78.1987
217	01_qrt	0.514553	111.658
217	01_qrt	0.452297	98.1484
217	01_qrt	0.533359	115.739
217	01_qrt	0.511413	110.977
217	01_qrt	0.61055	132.489
217	01_qrt	0.579652	125.784
217	01_qrt	0.610808	132.545
217	01_qrt	0.614536	133.354
217	01_qrt	0.614293	133.302
217	01_qrt	0.522221	113.322
217	01_qrt	0.627879	136.25
217	01_qrt	0.594422	128.989
217	01_qrt	0.54894	119.12
217	01_qrt	0.640182	138.919
217	01_qrt	0.62816	136.311
217	01_qrt	0.555771	120.602
217	01_qrt	0.586243	127.215
217	01_qrt	0.532916	115.643
217	01_qrt	0.459131	99.6314
217	01_qrt	0.619813	134.499
217	01_qrt	0.52839	114.661
217	01_qrt	0.627124	136.086
217	01_qrt	0.422077	91.5908
217	01_qrt	0.614351	133.314
217	01_qrt	0.511897	111.082
217	01_qrt	0.626677	135.989
217	01_qrt	0.572881	124.315
217	01_qrt	0.616229	133.722
217	01_qrt	0.486218	105.509
217	01_qrt	0.636132	138.041
217	01_qrt	0.492744	106.926
217	01_qrt	0.528346	114.651
217	01_qrt	0.40523	87.935
217	01_qrt	0.411643	89.3265
217	01_qrt	0.620331	134.612
217	01_qrt	0.524545	113.826
217	01_qrt	0.536442	116.408
217	01_qrt	0.511441	110.983
217	01_qrt	0.474315	102.926
217	01_qrt	0.627516	136.171
217	01_qrt	0.622522	135.087
217	01_qrt	0.605234	131.336
217	01_qrt	0.543561	117.953
217	01_qrt	0.632688	137.293
217	01_qrt	0.577966	125.419
217	01_qrt	0.59457	129.022
217	01_qrt	0.515035	111.763
217	01_qrt	0.530938	115.214
217	01_qrt	0.60624	131.554
217	01_qrt	0.53497	116.088
217	01_qrt	0.631357	137.004
217	01_qrt	0.630622	136.845
217	01_qrt	0.510014	110.673
217	01_qrt	0.552016	119.788
217	01_qrt	0.621346	134.832
217	01_qrt	0.550531	119.465
217	01_qrt	0.523973	113.702
217	01_qrt	0.516972	112.183
217	01_qrt	0.473219	102.688
217	01_qrt	0.597225	129.598
217	01_qrt	0.494815	107.375
217	01_qrt	0.468507	101.666
217	01_qrt	0.528233	114.626
217	01_qrt	0.541835	117.578
217	01_qrt	0.551657	119.71
217	01_qrt	0.550883	119.542
217	01_qrt	0.610383	132.453
217	01_qrt	0.6176	134.019
217	01_qrt	0.639991	138.878
217	01_qrt	0.555496	120.543
217	01_qrt	0.592985	128.678
217	01_qrt	0.505328	109.656
217	01_qrt	0.536734	116.471
217	01_qrt	0.590298	128.095
217	01_qrt	0.61415	133.271
217	01_qrt	0.653435	141.795
217	01_qrt	0.642305	139.38
217	01_qrt	0.632392	137.229
217	01_qrt	0.651331	141.339
217	01_qrt	0.502763	109.1
217	01_qrt	0.579453	125.741
217	01_qrt	0.643446	139.628
217	01_qrt	0.630114	136.735
217	01_qrt	0.533902	115.857
217	01_qrt	0.635748	137.957
217	01_qrt	0.718053	155.817
217	01_qrt	0.638925	138.647
217	01_qrt	0.571499	124.015
325	01_qrt	0.569535	185.099
325	01_qrt	0.489747	159.168
325	01_qrt	0.480185	156.06
325	01_qrt	0.444582	144.489
325	01_qrt	0.509803	165.686
325	01_qrt	0.467373	151.896
325	01_qrt	0.522589	169.841
325	01_qrt	0.501061	162.845
325	01_qrt	0.53442	173.686
325	01_qrt	0.503211	163.544
325	01_qrt	0.43904	142.688
325	01_qrt	0.513379	166.848
325	01_qrt	0.544405	176.932
325	01_qrt	0.504966	164.114
325	01_qrt	0.544248	176.881
325	01_qrt	0.545427	177.264
325	01_qrt	0.549433	178.566
325	01_qrt	0.507655	164.988
325	01_qrt	0.473066	153.746
325	01_qrt	0.483896	157.266
325	01_qrt	0.439599	142.87
325	01_qrt	0.379288	123.269
325	01_qrt	0.489278	159.015
325	01_qrt	0.419319	136.279
325	01_qrt	0.497531	161.698
325	01_qrt	0.396968	129.015
325	01_qrt	0.414724	134.785
325	01_qrt	0.454956	147.861
325	01_qrt	0.393545	127.902
325	01_qrt	0.279184	90.7348
325	01_qrt	0.433687	140.948
325	01_qrt	0.363997	118.299
325	01_qrt	0.447506	145.44
325	01_qrt	0.426328	138.557
325	01_qrt	0.544608	176.998
325	01_qrt	0.509955	165.735
325	01_qrt	0.538656	175.063
325	01_qrt	0.541296	175.921
325	01_qrt	0.54451	176.966
325	01_qrt	0.425919	138.424
325	01_qrt	0.5581	181.382
325	01_qrt	0.524738	170.54
325	01_qrt	0.460127	149.541
325	01_qrt	0.565476	183.78
325	01_qrt	0.56474	183.541
325	01_qrt	0.481175	156.382
325	01_qrt	0.516751	167.944
325	01_qrt	0.454598	147.744
325	01_qrt	0.364365	118.419
325	01_qrt	0.525389	170.751
325	01_qrt	0.431222	140.147
325	01_qrt	0.563786	183.23
325	01_qrt	0.32916	106.977
325	01_qrt	0.540551	175.679
325	01_qrt	0.43305	140.741
325	01_qrt	0.561272	182.413
325	01_qrt	0.492506	160.064
325	01_qrt	0.553177	179.783
325	01_qrt	0.376425	122.338
325	01_qrt	0.57373	186.462
325	01_qrt	0.394427	128.189
325	01_qrt	0.430416	139.885
325	01_qrt	0.288648	93.8106
325	01_qrt	0.338073	109.874
325	01_qrt	0.52282	169.916
325	01_qrt	0.385191	125.187
325	01_qrt	0.44354	144.151
325	01_qrt	0.421874	137.109
325	01_qrt	0.389336	126.534
325	01_qrt	0.539721	175.409
325	01_qrt	0.54302	176.482
325	01_qrt	0.528213	171.669
325	01_qrt	0.442265	143.736
325	01_qrt	0.549679	178.646
325	01_qrt	0.515912	167.671
325	01_qrt	0.524617	170.501
325	01_qrt	0.421105	136.859
325	01_qrt	0.445301	144.723
325	01_qrt	0.529303	172.024
325	01_qrt	0.430437	139.892
325	01_qrt	0.568754	184.845
325	01_qrt	0.557463	181.176
325	01_qrt	0.415196	134.939
325	01_qrt	0.477727	155.261
325	01_qrt	0.520625	169.203
325	01_qrt	0.471071	153.098
325	01_qrt	0.39064	126.958
325	01_qrt	0.425383	138.249
325	01_qrt	0.393988	128.046
325	01_qrt	0.515461	167.525
325	01_qrt	0.393595	127.918
325	01_qrt	0.398266	129.436
325	01_qrt	0.446554	145.13
325	01_qrt	0.458139	148.895
325	01_qrt	0.436482	141.857
325	01_qrt	0.480985	156.32
325	01_qrt	0.527742	171.516
325	01_qrt	0.551683	179.297
325	01_qrt	0.573254	186.308
325	01_qrt	0.473592	153.917
325	01_qrt	0.499933	162.478
325	01_qrt	0.426115	138.487
325	01_qrt	0.517015	168.03
325	01_qrt	0.514637	167.257
325	01_qrt	0.53195	172.884
325	01_qrt	0.597201	194.09
325	01_qrt	0.573046	186.24
325	01_qrt	0.563621	183.177
325	01_qrt	0.587897	191.067
325	01_qrt	0.400327	130.106
325	01_qrt	0.510575	165.937
325	01_qrt	0.583805	189.737
325	01_qrt	0.567979	184.593
325	01_qrt	0.448084	145.627
325	01_qrt	0.560914	182.297
325	01_qrt	0.664389	215.926
325	01_qrt	0.55287	179.683
325	01_qrt	0.459157	149.226
480	01_qrt	0.462805	222.146
480	01_qrt	0.39461	189.413
480	01_qrt	0.386105	185.33
480	01_qrt	0.351978	168.949
480	01_qrt	0.442231	212.271
480	01_qrt	0.360159	172.876
480	01_qrt	0.429108	205.972
480	01_qrt	0.410221	196.906
480	01_qrt	0.456115	218.935
480	01_qrt	0.415436	199.409
480	01_qrt	0.328604	157.73
480	01_qrt	0.44945	215.736
480	01_qrt	0.462301	221.904
480	01_qrt	0.384143	184.389
480	01_qrt	0.4618	221.664
480	01_qrt	0.46747	224.386
480	01_qrt	0.466066	223.712
480	01_qrt	0.414489	198.955
480	01_qrt	0.378121	181.498
480	01_qrt	0.394001	189.121
480	01_qrt	0.332713	159.702
480	01_qrt	0.294865	141.535
480	01_qrt	0.41077	197.17
480	01_qrt	0.286266	137.408
480	01_qrt	0.3993	191.664
480	01_qrt	0.296065	142.111
480	01_qrt	0.309859	148.732
480	01_qrt	0.350637	168.306
480	01_qrt	0.287618	138.057
480	01_qrt	0.218839	105.043
480	01_qrt	0.33026	158.525
480	01_qrt	0.275445	132.213
480	01_qrt	0.343502	164.881
480	01_qrt	0.35216	169.037
480	01_qrt	0.453764	217.807
480	01_qrt	0.418046	200.662
480	01_qrt	0.454257	218.043
480	01_qrt	0.431088	206.922
480	01_qrt	0.45008	216.038
480	01_qrt	0.340836	163.601
480	01_qrt	0.468299	224.783
480	01_qrt	0.437214	209.863
480	01_qrt	0.35811	171.893
480	01_qrt	0.463568	222.513
480	01_qrt	0.469685	225.449
480	01_qrt	0.373521	179.29
480	01_qrt	0.417755	200.522
480	01_qrt	0.371426	178.285
480	01_qrt	0.276524	132.732
480	01_qrt	0.462372	221.939
480	01_qrt	0.342916	164.6
480	01_qrt	0.483131	231.903
480	01_qrt	0.269763	129.486
480	01_qrt	0.458904	220.274
480	01_qrt	0.338596	162.526
480	01_qrt	0.475962	228.462
480	01_qrt	0.392251	188.28
480	01_qrt	0.470817	225.992
480	01_qrt	0.339392	162.908
480	01_qrt	0.493705	236.978
480	01_qrt	0.315462	151.422
480	01_qrt	0.335735	161.153
480	01_qrt	0.212661	102.077
480	01_qrt	0.24718	118.647
480	01_qrt	0.454877	218.341
480	01_qrt	0.234518	112.569
480	01_qrt	0.35334	169.603
480	01_qrt	0.31756	152.429
480	01_qrt	0.294536	141.377
480	01_qrt	0.454261	218.045
480	01_qrt	0.468545	224.902
480	01_qrt	0.433925	208.284
480	01_qrt	0.325204	156.098
480	01_qrt	0.459613	220.614
480	01_qrt	0.408277	195.973
480	01_qrt	0.437491	209.996
480	01_qrt	0.317694	152.493
480	01_qrt	0.366584	175.96
480	01_qrt	0.416606	199.971
480	01_qrt	0.30413	145.982
480	01_qrt	0.491122	235.738
480	01_qrt	0.480711	230.741
480	01_qrt	0.277078	132.997
480	01_qrt	0.391035	187.697
480	01_qrt	0.438461	210.461
480	01_qrt	0.371713	178.422
480	01_qrt	0.344085	165.161
480	01_qrt	0.323266	155.168
480	01_qrt	0.306106	146.931
480	01_qrt	0.428893	205.869
480	01_qrt	0.314628	151.021
480	01_qrt	0.233152	111.913
480	01_qrt	0.351836	168.881
480	01_qrt	0.363792	174.62
480	01_qrt	0.331796	159.262
480	01_qrt	0.386556	185.547
480	01_qrt	0.432113	207.414
480	01_qrt	0.460823	221.195
480	01_qrt	0.489715	235.063
480	01_qrt	0.391485	187.913
480	01_qrt	0.430425	206.604
480	01_qrt	0.329773	158.291
480	01_qrt	0.369048	177.143
480	01_qrt	0.421107	202.131
480	01_qrt	0.459962	220.782
480	01_qrt	0.523237	251.154
480	01_qrt	0.50391	241.877
480	01_qrt	0.488038	234.258
480	01_qrt	0.514829	247.118
480	01_qrt	0.364243	174.837
480	01_qrt	0.42603	204.494
480	01_qrt	0.504687	242.25
480	01_qrt	0.484527	232.573
480	01_qrt	0.343844	165.045
480	01_qrt	0.455813	218.79
480	01_qrt	0.673153	323.113
480	01_qrt	0.48178	231.254
480	01_qrt	0.412461	197.981
665	01_qrt	0.331965	220.756
665	01_qrt	0.315721	209.954
665	01_qrt	0.315248	209.64
665	01_qrt	0.257629	171.323
665	01_qrt	0.350431	233.037
665	01_qrt	0.294349	195.742
665	01_qrt	0.341923	227.379
665	01_qrt	0.316328	210.358
665	01_qrt	0.383229	254.847
665	01_qrt	0.339202	225.569
665	01_qrt	0.239691	159.395
665	01_qrt	0.356426	237.023
665	01_qrt	0.374245	248.873
665	01_qrt	0.309567	205.862
665	01_qrt	0.385055	256.061
665	01_qrt	0.378691	251.829
665	01_qrt	0.382843	254.59
665	01_qrt	0.36701	244.062
665	01_qrt	0.299646	199.265
665	01_qrt	0.302561	201.203
665	01_qrt	0.274179	182.329
665	01_qrt	0.224705	149.429
665	01_qrt	0.317736	211.295
665	01_qrt	0.219382	145.889
665	01_qrt	0.32498	216.112
665	01_qrt	0.225826	150.174
665	01_qrt	0.231118	153.693
665	01_qrt	0.260038	172.925
665	01_qrt	0.226353	150.524
665	01_qrt	0.174862	116.283
665	01_qrt	0.273114	181.621
665	01_qrt	0.197589	131.397
665	01_qrt	0.255631	169.995
665	01_qrt	0.296356	197.077
665	01_qrt	0.380675	253.149
665	01_qrt	0.322835	214.685
665	01_qrt	0.373658	248.482
665	01_qrt	0.35249	234.406
665	01_qrt	0.378029	251.389
665	01_qrt	0.261536	173.921
665	01_qrt	0.396461	263.647
665	01_qrt	0.373016	248.056
665	01_qrt	0.292622	194.594
665	01_qrt	0.396021	263.354
665	01_qrt	0.362098	240.795
665	01_qrt	0.292117	194.258
665	01_qrt	0.318598	211.868
665	01_qrt	0.28322	188.341
665	01_qrt	0.200598	133.398
665	01_qrt	0.364433	242.348
665	01_qrt	0.241041	160.293
665	01_qrt	0.390185	259.473
665	01_qrt	0.203336	135.218
665	01_qrt	0.368402	244.988
665	01_qrt	0.282609	187.935
665	01_qrt	0.401095	266.728
665	01_qrt	0.310701	206.616
665	01_qrt	0.378708	251.841
665	01_qrt	0.232612	154.687
665	01_qrt	0.417826	277.854
665	01_qrt	0.239985	159.59
665	01_qrt	0.248457	165.224
665	01_qrt	0.148266	98.5967
665	01_qrt	0.227594	151.35
665	01_qrt	0.349207	232.223
665	01_qrt	0.276518	183.885
665	01_qrt	0.234161	155.717
665	01_qrt	0.241232	160.419
665	01_qrt	0.23231	154.486
665	01_qrt	0.369648	245.816
665	01_qrt	0.388378	258.271
665	01_qrt	0.356565	237.115
665	01_qrt	0.231739	154.106
665	01_qrt	0.369333	245.606
665	01_qrt	0.348376	231.67
665	01_qrt	0.341854	227.333
665	01_qrt	0.290222	192.997
665	01_qrt	0.270485	179.872
665	01_qrt	0.371188	246.84
665	01_qrt	0.232546	154.643
665	01_qrt	0.413465	274.954
665	01_qrt	0.405623	269.739
665	01_qrt	0.244124	162.342
665	01_qrt	0.299043	198.864
665	01_qrt	0.367646	244.485
665	01_qrt	0.292759	194.685
665	01_qrt	0.262152	174.331
665	01_qrt	0.259969	172.879
665	01_qrt	0.243964	162.236
665	01_qrt	0.356964	237.381
665	01_qrt	0.216715	144.116
665	01_qrt	0.19439	129.269
665	01_qrt	0.280937	186.823
665	01_qrt	0.285405	189.795
665	01_qrt	0.24445	162.559
665	01_qrt	0.321213	213.607
665	01_qrt	0.329697	219.248
665	01_qrt	0.372841	247.94
665	01_qrt	0.397512	264.345
665	01_qrt	0.307248	204.32
665	01_qrt	0.324023	215.475
665	01_qrt	0.259895	172.83
665	01_qrt	0.304567	202.537
665	01_qrt	0.361693	240.526
665	01_qrt	0.359064	238.777
665	01_qrt	0.437959	291.243
665	01_qrt	0.409094	272.048
665	01_qrt	0.405602	269.725
665	01_qrt	0.414128	275.395
665	01_qrt	0.255442	169.869
665	01_qrt	0.33153	220.467
665	01_qrt	0.423602	281.695
665	01_qrt	0.386991	257.349
665	01_qrt	0.269826	179.434
665	01_qrt	0.377906	251.308
665	01_qrt	0.518303	344.672
665	01_qrt	0.399928	265.952
665	01_qrt	0.277646	184.635
866	01_qrt	0.335626	290.652
866	01_qrt	0.249697	216.238
866	01_qrt	0.253099	219.184
866	01_qrt	0.201858	174.809
866	01_qrt	0.302241	261.741
866	01_qrt	0.248328	215.052
866	01_qrt	0.298204	258.245
866	01_qrt	0.247396	214.245
866	01_qrt	0.323259	279.942
866	01_qrt	0.263342	228.054
866	01_qrt	0.199882	173.098
866	01_qrt	0.29352	254.188
866	01_qrt	0.307298	266.12
866	01_qrt	0.261101	226.114
866	01_qrt	0.320005	277.124
866	01_qrt	0.324446	280.97
866	01_qrt	0.317477	274.935
866	01_qrt	0.318351	275.692
866	01_qrt	0.244655	211.871
866	01_qrt	0.237881	206.005
866	01_qrt	0.233923	202.577
866	01_qrt	0.197435	170.978
866	01_qrt	0.261147	226.153
866	01_qrt	0.188514	163.253
866	01_qrt	0.257898	223.34
866	01_qrt	0.1813	157.006
866	01_qrt	0.207241	179.47
866	01_qrt	0.218281	189.032
866	01_qrt	0.18877	163.475
866	01_qrt	0.112433	97.3671
866	01_qrt	0.225195	195.019
866	01_qrt	0.149043	129.071
866	01_qrt	0.215784	186.869
866	01_qrt	0.213408	184.811
866	01_qrt	0.311729	269.957
866	01_qrt	0.25301	219.107
866	01_qrt	0.299484	259.353
866	01_qrt	0.274252	237.502
866	01_qrt	0.309309	267.862
866	01_qrt	0.201534	174.528
866	01_qrt	0.312491	270.617
866	01_qrt	0.313678	271.645
866	01_qrt	0.213729	185.089
866	01_qrt	0.322554	279.332
866	01_qrt	0.292994	253.732
866	01_qrt	0.250598	217.018
866	01_qrt	0.280328	242.764
866	01_qrt	0.241714	209.325
866	01_qrt	0.161799	140.118
866	01_qrt	0.328183	284.207
866	01_qrt	0.198733	172.103
866	01_qrt	0.341742	295.949
866	01_qrt	0.119085	103.128
866	01_qrt	0.312444	270.576
866	01_qrt	0.258015	223.441
866	01_qrt	0.347435	300.878
866	01_qrt	0.258379	223.757
866	01_qrt	0.313624	271.598
866	01_qrt	0.19443	168.376
866	01_qrt	0.348352	301.673
866	01_qrt	0.184456	159.739
866	01_qrt	0.194356	168.312
866	01_qrt	0.135353	117.215
866	01_qrt	0.187331	162.228
866	01_qrt	0.290499	251.572
866	01_qrt	0.22468	194.573
866	01_qrt	0.242817	210.28
866	01_qrt	0.189531	164.134
866	01_qrt	0.179744	155.658
866	01_qrt	0.309733	268.229
866	01_qrt	0.324231	280.784
866	01_qrt	0.306108	265.09
866	01_qrt	0.195557	169.352
866	01_qrt	0.308489	267.152
866	01_qrt	0.271149	234.815
866	01_qrt	0.313813	271.762
866	01_qrt	0.203648	176.359
866	01_qrt	0.239162	207.114
866	01_qrt	0.290763	251.801
866	01_qrt	0.0780809	67.6181
866	01_qrt	0.354841	307.292
866	01_qrt	0.336939	291.789
866	01_qrt	0.223016	193.132
866	01_qrt	0.253864	219.846
866	01_qrt	0.281541	243.815
866	01_qrt	0.266922	231.155
866	01_qrt	0.198817	172.176
866	01_qrt	0.212179	183.747
866	01_qrt	0.188841	163.537
866	01_qrt	0.283227	245.275
866	01_qrt	0.169841	147.082
866	01_qrt	0.179321	155.292
866	01_qrt	0.223046	193.158
866	01_qrt	0.230644	199.737
866	01_qrt	0.203061	175.851
866	01_qrt	0.235777	204.183
866	01_qrt	0.278625	241.289
866	01_qrt	0.308675	267.313
866	01_qrt	0.339728	294.205
866	01_qrt	0.245481	212.586
866	01_qrt	0.284028	245.969
866	01_qrt	0.183621	159.015
866	01_qrt	0.29086	251.885
866	01_qrt	0.277269	240.115
866	01_qrt	0.274966	238.121
866	01_qrt	0.350337	303.392
866	01_qrt	0.327467	283.586
866	01_qrt	0.346072	299.698
866	01_qrt	0.35598	308.279
866	01_qrt	0.241838	209.431
866	01_qrt	0.271996	235.548
866	01_qrt	0.350786	303.781
866	01_qrt	0.323092	279.798
866	01_qrt	0.216516	187.503
866	01_qrt	0.338277	292.948
866	01_qrt	0.454966	394.001
866	01_qrt	0.344952	298.729
866	01_qrt	0.268388	232.424
1098	01_qrt	0.290714	319.204
1098	01_qrt	0.210523	231.154
1098	01_qrt	0.219023	240.487
1098	01_qrt	0.20431	224.332
1098	01_qrt	0.253373	278.203
1098	01_qrt	0.224854	246.89
1098	01_qrt	0.220404	242.004
1098	01_qrt	0.222135	243.904
1098	01_qrt	0.267865	294.115
1098	01_qrt	0.225584	247.691
1098	01_qrt	0.155814	171.083
1098	01_qrt	0.218692	240.124
1098	01_qrt	0.245264	269.3
1098	01_qrt	0.198606	218.069
1098	01_qrt	0.262115	287.802
1098	01_qrt	0.264186	290.076
1098	01_qrt	0.253998	278.89
1098	01_qrt	0.268598	294.92
1098	01_qrt	0.206525	226.764
1098	01_qrt	0.191068	209.793
1098	01_qrt	0.19014	208.774
1098	01_qrt	0.159121	174.714
1098	01_qrt	0.232522	255.309
1098	01_qrt	0.201054	220.757
1098	01_qrt	0.206985	227.269
1098	01_qrt	0.145353	159.598
1098	01_qrt	0.16332	179.325
1098	01_qrt	0.168554	185.072
1098	01_qrt	0.124105	136.267
1098	01_qrt	0.116301	127.699
1098	01_qrt	0.167782	184.225
1098	01_qrt	0.127289	139.763
1098	01_qrt	0.177183	194.547
1098	01_qrt	0.167738	184.177
1098	01_qrt	0.256771	281.934
1098	01_qrt	0.220535	242.147
1098	01_qrt	0.250703	275.272
1098	01_qrt	0.229583	252.082
1098	01_qrt	0.268917	295.271
1098	01_qrt	0.151409	166.247
1098	01_qrt	0.266477	292.591
1098	01_qrt	0.265975	292.04
1098	01_qrt	0.218449	239.857
1098	01_qrt	0.249611	274.072
1098	01_qrt	0.236375	259.54
1098	01_qrt	0.203428	223.364
1098	01_qrt	0.224536	246.541
1098	01_qrt	0.187811	206.217
1098	01_qrt	0.147923	162.42
1098	01_qrt	0.281583	309.178
1098	01_qrt	0.196528	215.788
1098	01_qrt	0.282867	310.588
1098	01_qrt	0.124435	136.629
1098	01_qrt	0.268192	294.475
1098	01_qrt	0.192449	211.309
1098	01_qrt	0.273284	300.066
1098	01_qrt	0.205274	225.391
1098	01_qrt	0.254757	279.723
1098	01_qrt	0.146286	160.622
1098	01_qrt	0.297231	326.36
1098	01_qrt	0.165046	181.22
1098	01_qrt	0.163752	179.8
1098	01_qrt	0.109167	119.866
1098	01_qrt	0.164567	180.694
1098	01_qrt	0.237232	260.481
1098	01_qrt	0.143101	157.125
1098	01_qrt	0.169803	186.444
1098	01_qrt	0.164137	180.222
1098	01_qrt	0.181466	199.249
1098	01_qrt	0.248878	273.268
1098	01_qrt	0.274266	301.144
1098	01_qrt	0.252974	277.766
1098	01_qrt	0.139984	153.703
1098	01_qrt	0.241388	265.044
1098	01_qrt	0.226047	248.2
1098	01_qrt	0.241445	265.107
1098	01_qrt	0.15704	172.43
1098	01_qrt	0.202125	221.933
1098	01_qrt	0.221594	243.311
1098	01_qrt	0.132632	145.63
1098	01_qrt	0.290678	319.164
1098	01_qrt	0.280596	308.094
1098	01_qrt	0.130941	143.773
1098	01_qrt	0.192863	211.764
1098	01_qrt	0.23365	256.548
1098	01_qrt	0.203835	223.811
1098	01_qrt	0.181188	198.945
1098	01_qrt	0.168825	185.37
1098	01_qrt	0.143246	157.284
1098	01_qrt	0.233154	256.003
1098	01_qrt	0.134604	147.796
1098	01_qrt	0.170028	186.691
1098	01_qrt	0.156355	171.678
1098	01_qrt	0.17133	188.12
1098	01_qrt	0.163086	179.068
1098	01_qrt	0.210057	230.643
1098	01_qrt	0.224451	246.447
1098	01_qrt	0.247428	271.676
1098	01_qrt	0.304045	333.841
1098	01_qrt	0.181461	199.244
1098	01_qrt	0.238047	261.375
1098	01_qrt	0.161334	177.145
1098	01_qrt	0.219679	241.207
1098	01_qrt	0.264555	290.481
1098	01_qrt	0.250209	274.729
1098	01_qrt	0.277806	305.031
1098	01_qrt	0.271403	298
1098	01_qrt	0.276907	304.043
1098	01_qrt	0.305369	335.295
1098	01_qrt	0.19746	216.811
1098	01_qrt	0.245982	270.088
1098	01_qrt	0.301541	331.092
1098	01_qrt	0.269518	295.93
1098	01_qrt	0.178015	195.461
1098	01_qrt	0.294578	323.447
1098	01_qrt	0.375839	412.671
1098	01_qrt	0.284973	312.9
1098	01_qrt	0.219294	240.784
27	02_QM	0.736298	19.88
27	02_QM	0.695972	18.7912
27	02_QM	0.689073	18.605
27	02_QM	0.655067	17.6868
27	02_QM	0.667714	18.0283
27	02_QM	0.702186	18.959
27	02_QM	0.703377	18.9912
27	02_QM	0.763741	20.621
27	02_QM	0.737317	19.9076
27	02_QM	0.744781	20.1091
27	02_QM	0.737	19.899
27	02_QM	0.695908	18.7895
27	02_QM	0.733367	19.8009
27	02_QM	0.746731	20.1617
27	02_QM	0.659615	17.8096
27	02_QM	0.746746	20.1622
27	02_QM	0.70214	18.9578
27	02_QM	0.691936	18.6823
27	02_QM	0.695487	18.7781
27	02_QM	0.640864	17.3033
27	02_QM	0.725419	19.5863
27	02_QM	0.687956	18.5748
27	02_QM	0.683584	18.4568
27	02_QM	0.730084	19.7123
27	02_QM	0.741039	20.008
27	02_QM	0.750108	20.2529
27	02_QM	0.747295	20.177
27	02_QM	0.724627	19.5649
27	02_QM	0.755085	20.3873
27	02_QM	0.732709	19.7831
27	02_QM	0.719131	19.4166
27	02_QM	0.750091	20.2524
27	02_QM	0.701997	18.9539
27	02_QM	0.761495	20.5604
27	02_QM	0.7097	19.1619
27	02_QM	0.770458	20.8024
27	02_QM	0.715781	19.3261
27	02_QM	0.729411	19.6941
27	02_QM	0.741611	20.0235
27	02_QM	0.770223	20.796
27	02_QM	0.732179	19.7688
27	02_QM	0.718652	19.4036
27	02_QM	0.748867	20.2194
27	02_QM	0.711946	19.2225
27	02_QM	0.708749	19.1362
27	02_QM	0.757665	20.4569
27	02_QM	0.7535	20.3445
27	02_QM	0.736704	19.891
27	02_QM	0.737341	19.9082
27	02_QM	0.761369	20.557
27	02_QM	0.734814	19.84
27	02_QM	0.710944	19.1955
27	02_QM	0.694096	18.7406
27	02_QM	0.706905	19.0864
27	02_QM	0.708125	19.1194
27	02_QM	0.73798	19.9255
27	02_QM	0.733414	19.8022
27	02_QM	0.757904	20.4634
27	02_QM	0.704855	19.0311
27	02_QM	0.682319	18.4226
27	02_QM	0.737472	19.9117
27	02_QM	0.757828	20.4614
27	02_QM	0.730316	19.7185
27	02_QM	0.64679	17.4633
27	02_QM	0.656514	17.7259
27	02_QM	0.659991	17.8198
27	02_QM	0.672951	18.1697
27	02_QM	0.753219	20.3369
27	02_QM	0.754651	20.3756
27	02_QM	0.687968	18.5751
27	02_QM	0.699142	18.8768
27	02_QM	0.707923	19.1139
27	02_QM	0.748643	20.2134
27	02_QM	0.625047	16.8763
27	02_QM	0.693927	18.736
27	02_QM	0.702255	18.9609
27	02_QM	0.769408	20.774
27	02_QM	0.71509	19.3074
27	02_QM	0.753409	20.342
27	02_QM	0.751632	20.2941
27	02_QM	0.739347	19.9624
27	02_QM	0.734125	19.8214
27	02_QM	0.74646	20.1544
27	02_QM	0.732115	19.7671
27	02_QM	0.751477	20.2899
27	02_QM	0.637776	17.2199
27	02_QM	0.759819	20.5151
27	02_QM	0.734884	19.8419
27	02_QM	0.756711	20.4312
27	02_QM	0.699056	18.8745
27	02_QM	0.698521	18.8601
27	02_QM	0.696867	18.8154
27	02_QM	0.69925	18.8798
27	02_QM	0.743533	20.0754
27	02_QM	0.776662	20.9699
27	02_QM	0.773314	20.8795
27	02_QM	0.721368	19.4769
27	02_QM	0.777333	20.988
27	02_QM	0.699615	18.8896
27	02_QM	0.755047	20.3863
27	02_QM	0.756273	20.4194
27	02_QM	0.712703	19.243
27	02_QM	0.701869	18.9505
27	02_QM	0.82767	22.3471
27	02_QM	0.753028	20.3317
65	02_QM	0.719347	46.7576
65	02_QM	0.67636	43.9634
65	02_QM	0.663023	43.0965
65	02_QM	0.647682	42.0993
65	02_QM	0.654653	42.5525
65	02_QM	0.677155	44.0151
65	02_QM	0.67465	43.8522
65	02_QM	0.760262	49.417
65	02_QM	0.733406	47.6714
65	02_QM	0.734615	47.75
65	02_QM	0.711026	46.2167
65	02_QM	0.667066	43.3593
65	02_QM	0.719429	46.7629
65	02_QM	0.729053	47.3884
65	02_QM	0.624634	40.6012
65	02_QM	0.735281	47.7933
65	02_QM	0.692172	44.9912
65	02_QM	0.663282	43.1134
65	02_QM	0.641672	41.7087
65	02_QM	0.628193	40.8325
65	02_QM	0.700693	45.545
65	02_QM	0.673595	43.7837
65	02_QM	0.655789	42.6263
65	02_QM	0.718883	46.7274
65	02_QM	0.725418	47.1522
65	02_QM	0.734307	47.7299
65	02_QM	0.733973	47.7082
65	02_QM	0.698664	45.4131
65	02_QM	0.740287	48.1186
65	02_QM	0.719065	46.7392
65	02_QM	0.699574	45.4723
65	02_QM	0.734937	47.7709
65	02_QM	0.688193	44.7325
65	02_QM	0.750295	48.7692
65	02_QM	0.692665	45.0232
65	02_QM	0.762451	49.5593
65	02_QM	0.705734	45.8727
65	02_QM	0.711241	46.2307
65	02_QM	0.72967	47.4286
65	02_QM	0.762759	49.5793
65	02_QM	0.691971	44.9781
65	02_QM	0.68527	44.5425
65	02_QM	0.715281	46.4933
65	02_QM	0.693799	45.097
65	02_QM	0.690259	44.8668
65	02_QM	0.742962	48.2925
65	02_QM	0.738955	48.032
65	02_QM	0.729684	47.4294
65	02_QM	0.716951	46.6018
65	02_QM	0.746235	48.5053
65	02_QM	0.715506	46.5079
65	02_QM	0.698538	45.405
65	02_QM	0.662875	43.0869
65	02_QM	0.688982	44.7838
65	02_QM	0.689142	44.7942
65	02_QM	0.720498	46.8324
65	02_QM	0.718466	46.7003
65	02_QM	0.743234	48.3102
65	02_QM	0.692522	45.0139
65	02_QM	0.66304	43.0976
65	02_QM	0.717645	46.6469
65	02_QM	0.737972	47.9682
65	02_QM	0.71512	46.4828
65	02_QM	0.619367	40.2589
65	02_QM	0.639898	41.5934
65	02_QM	0.635552	41.3109
65	02_QM	0.633475	41.1759
65	02_QM	0.731902	47.5736
65	02_QM	0.729984	47.4489
65	02_QM	0.650694	42.2951
65	02_QM	0.647923	42.115
65	02_QM	0.651604	42.3543
65	02_QM	0.700818	45.5532
65	02_QM	0.602228	39.1448
65	02_QM	0.677364	44.0287
65	02_QM	0.687113	44.6623
65	02_QM	0.760838	49.4545
65	02_QM	0.680874	44.2568
65	02_QM	0.736016	47.8411
65	02_QM	0.739472	48.0657
65	02_QM	0.723068	46.9994
65	02_QM	0.71305	46.3483
65	02_QM	0.724163	47.0706
65	02_QM	0.706106	45.8969
65	02_QM	0.735055	47.7786
65	02_QM	0.623328	40.5163
65	02_QM	0.750417	48.7771
65	02_QM	0.712897	46.3383
65	02_QM	0.733638	47.6865
65	02_QM	0.661127	42.9732
65	02_QM	0.663561	43.1314
65	02_QM	0.678959	44.1323
65	02_QM	0.685868	44.5814
65	02_QM	0.730443	47.4788
65	02_QM	0.766787	49.8412
65	02_QM	0.761684	49.5095
65	02_QM	0.711026	46.2167
65	02_QM	0.754772	49.0602
65	02_QM	0.686789	44.6413
65	02_QM	0.742278	48.248
65	02_QM	0.746257	48.5067
65	02_QM	0.708507	46.0529
65	02_QM	0.683862	44.451
65	02_QM	0.78819	51.2323
65	02_QM	0.740283	48.1184
124	02_QM	0.677289	83.9839
124	02_QM	0.614955	76.2544
124	02_QM	0.583841	72.3963
124	02_QM	0.596468	73.962
124	02_QM	0.579146	71.8141
124	02_QM	0.593753	73.6253
124	02_QM	0.582709	72.2559
124	02_QM	0.710979	88.1614
124	02_QM	0.673983	83.5739
124	02_QM	0.694857	86.1623
124	02_QM	0.668409	82.8827
124	02_QM	0.61717	76.529
124	02_QM	0.666365	82.6292
124	02_QM	0.688455	85.3684
124	02_QM	0.53958	66.9079
124	02_QM	0.702192	87.0718
124	02_QM	0.627731	77.8387
124	02_QM	0.561769	69.6593
124	02_QM	0.547541	67.8951
124	02_QM	0.574582	71.2482
124	02_QM	0.653458	81.0288
124	02_QM	0.623349	77.2953
124	02_QM	0.59592	73.894
124	02_QM	0.675449	83.7556
124	02_QM	0.673732	83.5428
124	02_QM	0.688096	85.3239
124	02_QM	0.689834	85.5395
124	02_QM	0.608737	75.4834
124	02_QM	0.70525	87.451
124	02_QM	0.678569	84.1426
124	02_QM	0.623926	77.3669
124	02_QM	0.691469	85.7421
124	02_QM	0.645586	80.0527
124	02_QM	0.707431	87.7214
124	02_QM	0.625417	77.5517
124	02_QM	0.718439	89.0865
124	02_QM	0.654263	81.1286
124	02_QM	0.656857	81.4503
124	02_QM	0.680194	84.344
124	02_QM	0.707731	87.7587
124	02_QM	0.599691	74.3616
124	02_QM	0.575676	71.3838
124	02_QM	0.675891	83.8105
124	02_QM	0.631252	78.2753
124	02_QM	0.636471	78.9224
124	02_QM	0.696648	86.3844
124	02_QM	0.682635	84.6468
124	02_QM	0.688636	85.3908
124	02_QM	0.655994	81.3433
124	02_QM	0.703507	87.2349
124	02_QM	0.672447	83.3834
124	02_QM	0.62451	77.4392
124	02_QM	0.580234	71.949
124	02_QM	0.617875	76.6165
124	02_QM	0.617524	76.5729
124	02_QM	0.67434	83.6181
124	02_QM	0.685443	84.9949
124	02_QM	0.688564	85.3819
124	02_QM	0.631153	78.263
124	02_QM	0.605444	75.0751
124	02_QM	0.66898	82.9535
124	02_QM	0.702008	87.049
124	02_QM	0.672012	83.3295
124	02_QM	0.579545	71.8636
124	02_QM	0.559724	69.4057
124	02_QM	0.57489	71.2863
124	02_QM	0.550722	68.2895
124	02_QM	0.687487	85.2484
124	02_QM	0.690368	85.6057
124	02_QM	0.559128	69.3319
124	02_QM	0.561404	69.6141
124	02_QM	0.545848	67.6851
124	02_QM	0.630515	78.1838
124	02_QM	0.538957	66.8307
124	02_QM	0.603971	74.8924
124	02_QM	0.645268	80.0132
124	02_QM	0.725299	89.937
124	02_QM	0.594188	73.6793
124	02_QM	0.691133	85.7005
124	02_QM	0.697583	86.5003
124	02_QM	0.678831	84.175
124	02_QM	0.674067	83.5843
124	02_QM	0.677414	83.9994
124	02_QM	0.671175	83.2258
124	02_QM	0.695491	86.2408
124	02_QM	0.572764	71.0228
124	02_QM	0.718018	89.0342
124	02_QM	0.670947	83.1974
124	02_QM	0.679809	84.2963
124	02_QM	0.574547	71.2439
124	02_QM	0.57185	70.9094
124	02_QM	0.612089	75.899
124	02_QM	0.654299	81.1331
124	02_QM	0.694738	86.1475
124	02_QM	0.720429	89.3331
124	02_QM	0.726399	90.0735
124	02_QM	0.662082	82.0982
124	02_QM	0.727827	90.2505
124	02_QM	0.631592	78.3174
124	02_QM	0.699038	86.6808
124	02_QM	0.70525	87.451
124	02_QM	0.668321	82.8718
124	02_QM	0.617915	76.6214
124	02_QM	0.794135	98.4727
124	02_QM	0.691396	85.7331
217	02_QM	0.615903	133.651
217	02_QM	0.53941	117.052
217	02_QM	0.478153	103.759
217	02_QM	0.486402	105.549
217	02_QM	0.49098	106.543
217	02_QM	0.465257	100.961
217	02_QM	0.454419	98.609
217	02_QM	0.657395	142.655
217	02_QM	0.609928	132.354
217	02_QM	0.639913	138.861
217	02_QM	0.607039	131.727
217	02_QM	0.519263	112.68
217	02_QM	0.571414	123.997
217	02_QM	0.624461	135.508
217	02_QM	0.418417	90.7965
217	02_QM	0.645435	140.059
217	02_QM	0.536833	116.493
217	02_QM	0.442561	96.0358
217	02_QM	0.41256	89.5255
217	02_QM	0.473292	102.704
217	02_QM	0.554716	120.373
217	02_QM	0.534669	116.023
217	02_QM	0.501041	108.726
217	02_QM	0.603806	131.026
217	02_QM	0.606621	131.637
217	02_QM	0.629845	136.676
217	02_QM	0.626504	135.951
217	02_QM	0.472679	102.571
217	02_QM	0.639743	138.824
217	02_QM	0.614028	133.244
217	02_QM	0.527048	114.369
217	02_QM	0.625164	135.661
217	02_QM	0.557431	120.963
217	02_QM	0.635603	137.926
217	02_QM	0.538429	116.839
217	02_QM	0.658024	142.791
217	02_QM	0.575725	124.932
217	02_QM	0.589404	127.901
217	02_QM	0.599162	130.018
217	02_QM	0.647535	140.515
217	02_QM	0.478322	103.796
217	02_QM	0.416787	90.4428
217	02_QM	0.565209	122.65
217	02_QM	0.552143	119.815
217	02_QM	0.547102	118.721
217	02_QM	0.636093	138.032
217	02_QM	0.608521	132.049
217	02_QM	0.636669	138.157
217	02_QM	0.588327	127.667
217	02_QM	0.640313	138.948
217	02_QM	0.610392	132.455
217	02_QM	0.537528	116.644
217	02_QM	0.478902	103.922
217	02_QM	0.503296	109.215
217	02_QM	0.534407	115.966
217	02_QM	0.618321	134.176
217	02_QM	0.625349	135.701
217	02_QM	0.603027	130.857
217	02_QM	0.539253	117.018
217	02_QM	0.539474	117.066
217	02_QM	0.598923	129.966
217	02_QM	0.637156	138.263
217	02_QM	0.607118	131.745
217	02_QM	0.477346	103.584
217	02_QM	0.458356	99.4633
217	02_QM	0.489078	106.13
217	02_QM	0.431103	93.5494
217	02_QM	0.627751	136.222
217	02_QM	0.619709	134.477
217	02_QM	0.452846	98.2676
217	02_QM	0.438204	95.0902
217	02_QM	0.431825	93.706
217	02_QM	0.516272	112.031
217	02_QM	0.425913	92.4232
217	02_QM	0.508507	110.346
217	02_QM	0.560672	121.666
217	02_QM	0.65618	142.391
217	02_QM	0.46311	100.495
217	02_QM	0.622914	135.172
217	02_QM	0.635538	137.912
217	02_QM	0.60636	131.58
217	02_QM	0.616605	133.803
217	02_QM	0.609092	132.173
217	02_QM	0.614797	133.411
217	02_QM	0.637177	138.267
217	02_QM	0.467445	101.436
217	02_QM	0.658439	142.881
217	02_QM	0.598577	129.891
217	02_QM	0.57122	123.955
217	02_QM	0.440438	95.5751
217	02_QM	0.438843	95.229
217	02_QM	0.492606	106.895
217	02_QM	0.566328	122.893
217	02_QM	0.635177	137.833
217	02_QM	0.66237	143.734
217	02_QM	0.667906	144.936
217	02_QM	0.600703	130.352
217	02_QM	0.698647	151.606
217	02_QM	0.552183	119.824
217	02_QM	0.655505	142.245
217	02_QM	0.660422	143.312
217	02_QM	0.597861	129.736
217	02_QM	0.539751	117.126
217	02_QM	0.773887	167.933
217	02_QM	0.633308	137.428
325	02_QM	0.548462	178.25
325	02_QM	0.44674	145.191
325	02_QM	0.363273	118.064
325	02_QM	0.389504	126.589
325	02_QM	0.390552	126.929
325	02_QM	0.382132	124.193
325	02_QM	0.347114	112.812
325	02_QM	0.609112	197.961
325	02_QM	0.5261	170.982
325	02_QM	0.573644	186.434
325	02_QM	0.549371	178.546
325	02_QM	0.423445	137.62
325	02_QM	0.477412	155.159
325	02_QM	0.562605	182.847
325	02_QM	0.333663	108.441
325	02_QM	0.574577	186.738
325	02_QM	0.450054	146.268
325	02_QM	0.320012	104.004
325	02_QM	0.314819	102.316
325	02_QM	0.38744	125.918
325	02_QM	0.464284	150.892
325	02_QM	0.430012	139.754
325	02_QM	0.398318	129.453
325	02_QM	0.52744	171.418
325	02_QM	0.528028	171.609
325	02_QM	0.55416	180.102
325	02_QM	0.559699	181.902
325	02_QM	0.365872	118.908
325	02_QM	0.559899	181.967
325	02_QM	0.535074	173.899
325	02_QM	0.432851	140.676
325	02_QM	0.554718	180.283
325	02_QM	0.496604	161.396
325	02_QM	0.569343	185.037
325	02_QM	0.451646	146.785
325	02_QM	0.575506	187.04
325	02_QM	0.50417	163.855
325	02_QM	0.50884	165.373
325	02_QM	0.5175	168.188
325	02_QM	0.569816	185.19
325	02_QM	0.399809	129.938
325	02_QM	0.328189	106.662
325	02_QM	0.47145	153.221
325	02_QM	0.474077	154.075
325	02_QM	0.463834	150.746
325	02_QM	0.568918	184.898
325	02_QM	0.517138	168.07
325	02_QM	0.565654	183.838
325	02_QM	0.515668	167.592
325	02_QM	0.56164	182.533
325	02_QM	0.530982	172.569
325	02_QM	0.419883	136.462
325	02_QM	0.383394	124.603
325	02_QM	0.407728	132.511
325	02_QM	0.448969	145.915
325	02_QM	0.540945	175.807
325	02_QM	0.557364	181.143
325	02_QM	0.5399	175.467
325	02_QM	0.4607	149.728
325	02_QM	0.440685	143.223
325	02_QM	0.521571	169.511
325	02_QM	0.560783	182.255
325	02_QM	0.53775	174.769
325	02_QM	0.396697	128.927
325	02_QM	0.366065	118.971
325	02_QM	0.383466	124.626
325	02_QM	0.324227	105.374
325	02_QM	0.561483	182.482
325	02_QM	0.547336	177.884
325	02_QM	0.340518	110.668
325	02_QM	0.331046	107.59
325	02_QM	0.34549	112.284
325	02_QM	0.434556	141.231
325	02_QM	0.331783	107.829
325	02_QM	0.429633	139.631
325	02_QM	0.49351	160.391
325	02_QM	0.594649	193.261
325	02_QM	0.369377	120.047
325	02_QM	0.553394	179.853
325	02_QM	0.556072	180.723
325	02_QM	0.543025	176.483
325	02_QM	0.54625	177.531
325	02_QM	0.523126	170.016
325	02_QM	0.530717	172.483
325	02_QM	0.574206	186.617
325	02_QM	0.387125	125.816
325	02_QM	0.599837	194.947
325	02_QM	0.528731	171.838
325	02_QM	0.474487	154.208
325	02_QM	0.343844	111.749
325	02_QM	0.346952	112.76
325	02_QM	0.409356	133.041
325	02_QM	0.479932	155.978
325	02_QM	0.583008	189.477
325	02_QM	0.584246	189.88
325	02_QM	0.590879	192.036
325	02_QM	0.504675	164.019
325	02_QM	0.632695	205.626
325	02_QM	0.470211	152.819
325	02_QM	0.590644	191.959
325	02_QM	0.576757	187.446
325	02_QM	0.517802	168.286
325	02_QM	0.42663	138.655
325	02_QM	0.712033	231.411
325	02_QM	0.550144	178.797
480	02_QM	0.470595	225.886
480	02_QM	0.359228	172.43
480	02_QM	0.279906	134.355
480	02_QM	0.29503	141.614
480	02_QM	0.293513	140.886
480	02_QM	0.308436	148.049
480	02_QM	0.29935	143.688
480	02_QM	0.514839	247.123
480	02_QM	0.443135	212.705
480	02_QM	0.485497	233.038
480	02_QM	0.512425	245.964
480	02_QM	0.325017	156.008
480	02_QM	0.36953	177.374
480	02_QM	0.462237	221.874
480	02_QM	0.226984	108.952
480	02_QM	0.490698	235.535
480	02_QM	0.34708	166.598
480	02_QM	0.22924	110.035
480	02_QM	0.232194	111.453
480	02_QM	0.298782	143.416
480	02_QM	0.383552	184.105
480	02_QM	0.334423	160.523
480	02_QM	0.293867	141.056
480	02_QM	0.42931	206.069
480	02_QM	0.430246	206.518
480	02_QM	0.454685	218.249
480	02_QM	0.461881	221.703
480	02_QM	0.267642	128.468
480	02_QM	0.469526	225.372
480	02_QM	0.445055	213.626
480	02_QM	0.313869	150.657
480	02_QM	0.465513	223.446
480	02_QM	0.40134	192.643
480	02_QM	0.487044	233.781
480	02_QM	0.369619	177.417
480	02_QM	0.487931	234.207
480	02_QM	0.422199	202.656
480	02_QM	0.415225	199.308
480	02_QM	0.394138	189.186
480	02_QM	0.490256	235.323
480	02_QM	0.326635	156.785
480	02_QM	0.206137	98.9455
480	02_QM	0.37549	180.235
480	02_QM	0.386032	185.295
480	02_QM	0.359783	172.696
480	02_QM	0.48772	234.106
480	02_QM	0.414464	198.943
480	02_QM	0.487613	234.054
480	02_QM	0.424823	203.915
480	02_QM	0.46658	223.958
480	02_QM	0.452147	217.031
480	02_QM	0.346072	166.114
480	02_QM	0.302313	145.11
480	02_QM	0.302788	145.338
480	02_QM	0.35034	168.163
480	02_QM	0.447936	215.009
480	02_QM	0.476786	228.857
480	02_QM	0.426437	204.69
480	02_QM	0.33203	159.374
480	02_QM	0.343935	165.089
480	02_QM	0.411698	197.615
480	02_QM	0.474489	227.755
480	02_QM	0.439338	210.882
480	02_QM	0.304779	146.294
480	02_QM	0.267124	128.22
480	02_QM	0.283141	135.908
480	02_QM	0.234082	112.359
480	02_QM	0.462026	221.773
480	02_QM	0.445527	213.853
480	02_QM	0.242376	116.34
480	02_QM	0.236833	113.68
480	02_QM	0.243593	116.925
480	02_QM	0.315865	151.615
480	02_QM	0.238035	114.257
480	02_QM	0.321458	154.3
480	02_QM	0.408216	195.943
480	02_QM	0.507582	243.639
480	02_QM	0.244688	117.45
480	02_QM	0.452978	217.429
480	02_QM	0.468254	224.762
480	02_QM	0.459749	220.68
480	02_QM	0.47263	226.862
480	02_QM	0.409739	196.675
480	02_QM	0.462438	221.97
480	02_QM	0.475763	228.366
480	02_QM	0.303931	145.887
480	02_QM	0.495054	237.626
480	02_QM	0.431434	207.088
480	02_QM	0.365724	175.547
480	02_QM	0.265709	127.54
480	02_QM	0.239367	114.896
480	02_QM	0.30954	148.579
480	02_QM	0.353457	169.659
480	02_QM	0.496386	238.265
480	02_QM	0.487206	233.859
480	02_QM	0.513656	246.555
480	02_QM	0.415609	199.492
480	02_QM	0.535472	257.027
480	02_QM	0.356999	171.36
480	02_QM	0.512744	246.117
480	02_QM	0.50216	241.037
480	02_QM	0.434392	208.508
480	02_QM	0.339719	163.065
480	02_QM	0.666135	319.745
480	02_QM	0.466871	224.098
665	02_QM	0.363636	241.818
665	02_QM	0.278969	185.515
665	02_QM	0.207404	137.924
665	02_QM	0.234072	155.658
665	02_QM	0.222836	148.186
665	02_QM	0.279846	186.098
665	02_QM	0.186688	124.147
665	02_QM	0.418489	278.295
665	02_QM	0.362647	241.16
665	02_QM	0.398139	264.763
665	02_QM	0.420511	279.64
665	02_QM	0.231034	153.638
665	02_QM	0.284292	189.054
665	02_QM	0.371138	246.807
665	02_QM	0.167648	111.486
665	02_QM	0.402283	267.518
665	02_QM	0.278734	185.358
665	02_QM	0.200552	133.367
665	02_QM	0.191883	127.602
665	02_QM	0.235055	156.312
665	02_QM	0.320877	213.383
665	02_QM	0.253913	168.852
665	02_QM	0.222304	147.832
665	02_QM	0.352314	234.289
665	02_QM	0.339931	226.054
665	02_QM	0.358708	238.541
665	02_QM	0.381567	253.742
665	02_QM	0.189444	125.981
665	02_QM	0.387138	257.447
665	02_QM	0.349382	232.339
665	02_QM	0.254215	169.053
665	02_QM	0.379939	252.66
665	02_QM	0.309708	205.956
665	02_QM	0.39585	263.24
665	02_QM	0.286955	190.825
665	02_QM	0.39523	262.828
665	02_QM	0.338787	225.294
665	02_QM	0.338948	225.401
665	02_QM	0.291543	193.876
665	02_QM	0.373568	248.423
665	02_QM	0.214598	142.707
665	02_QM	0.134799	89.6413
665	02_QM	0.268391	178.48
665	02_QM	0.300421	199.78
665	02_QM	0.279794	186.063
665	02_QM	0.383147	254.793
665	02_QM	0.320617	213.21
665	02_QM	0.382694	254.491
665	02_QM	0.35477	235.922
665	02_QM	0.372188	247.505
665	02_QM	0.338611	225.176
665	02_QM	0.287465	191.164
665	02_QM	0.228232	151.774
665	02_QM	0.245427	163.209
665	02_QM	0.274925	182.825
665	02_QM	0.363364	241.637
665	02_QM	0.396815	263.882
665	02_QM	0.361594	240.46
665	02_QM	0.279991	186.194
665	02_QM	0.260987	173.556
665	02_QM	0.341785	227.287
665	02_QM	0.385822	256.572
665	02_QM	0.367219	244.2
665	02_QM	0.254985	169.565
665	02_QM	0.213075	141.695
665	02_QM	0.204839	136.218
665	02_QM	0.202431	134.617
665	02_QM	0.382045	254.06
665	02_QM	0.354484	235.732
665	02_QM	0.212285	141.169
665	02_QM	0.184376	122.61
665	02_QM	0.181389	120.624
665	02_QM	0.268556	178.59
665	02_QM	0.205479	136.643
665	02_QM	0.251274	167.097
665	02_QM	0.312761	207.986
665	02_QM	0.401961	267.304
665	02_QM	0.184366	122.603
665	02_QM	0.364258	242.231
665	02_QM	0.384004	255.363
665	02_QM	0.359649	239.167
665	02_QM	0.381077	253.416
665	02_QM	0.332178	220.898
665	02_QM	0.365584	243.113
665	02_QM	0.393415	261.621
665	02_QM	0.232171	154.394
665	02_QM	0.433625	288.36
665	02_QM	0.362683	241.184
665	02_QM	0.287516	191.198
665	02_QM	0.184421	122.64
665	02_QM	0.174247	115.874
665	02_QM	0.246846	164.153
665	02_QM	0.318073	211.519
665	02_QM	0.422095	280.693
665	02_QM	0.392647	261.11
665	02_QM	0.430104	286.019
665	02_QM	0.313192	208.273
665	02_QM	0.473463	314.853
665	02_QM	0.281732	187.351
665	02_QM	0.420956	279.936
665	02_QM	0.407548	271.02
665	02_QM	0.34432	228.973
665	02_QM	0.245718	163.403
665	02_QM	0.590849	392.915
665	02_QM	0.391909	260.62
866	02_QM	0.292015	252.885
866	02_QM	0.213897	185.235
866	02_QM	0.170105	147.311
866	02_QM	0.194213	168.188
866	02_QM	0.164075	142.089
866	02_QM	0.189711	164.29
866	02_QM	0.174966	151.521
866	02_QM	0.356282	308.54
866	02_QM	0.303283	262.643
866	02_QM	0.328771	284.716
866	02_QM	0.34401	297.913
866	02_QM	0.164977	142.87
866	02_QM	0.229922	199.112
866	02_QM	0.301846	261.399
866	02_QM	0.162798	140.983
866	02_QM	0.318652	275.953
866	02_QM	0.204496	177.093
866	02_QM	0.165155	143.024
866	02_QM	0.152922	132.43
866	02_QM	0.191016	165.42
866	02_QM	0.248744	215.413
866	02_QM	0.184496	159.773
866	02_QM	0.165629	143.434
866	02_QM	0.25035	216.803
866	02_QM	0.26208	226.961
866	02_QM	0.306995	265.857
866	02_QM	0.31145	269.715
866	02_QM	0.160621	139.098
866	02_QM	0.285516	247.257
866	02_QM	0.284977	246.79
866	02_QM	0.200426	173.569
866	02_QM	0.311317	269.601
866	02_QM	0.255094	220.911
866	02_QM	0.32525	281.667
866	02_QM	0.246131	213.15
866	02_QM	0.348973	302.211
866	02_QM	0.265776	230.162
866	02_QM	0.281396	243.689
866	02_QM	0.238002	206.109
866	02_QM	0.313662	271.632
866	02_QM	0.209882	181.758
866	02_QM	0.146447	126.823
866	02_QM	0.246271	213.271
866	02_QM	0.24447	211.711
866	02_QM	0.231704	200.656
866	02_QM	0.31302	271.075
866	02_QM	0.256769	222.362
866	02_QM	0.306905	265.779
866	02_QM	0.290478	251.554
866	02_QM	0.305212	264.314
866	02_QM	0.274344	237.582
866	02_QM	0.223008	193.125
866	02_QM	0.190869	165.293
866	02_QM	0.177097	153.366
866	02_QM	0.226163	195.857
866	02_QM	0.306337	265.288
866	02_QM	0.328519	284.497
866	02_QM	0.317944	275.339
866	02_QM	0.202352	175.237
866	02_QM	0.239541	207.443
866	02_QM	0.266835	231.079
866	02_QM	0.320025	277.142
866	02_QM	0.283587	245.587
866	02_QM	0.24867	215.348
866	02_QM	0.171173	148.236
866	02_QM	0.180678	156.467
866	02_QM	0.141863	122.853
866	02_QM	0.309296	267.851
866	02_QM	0.247238	214.108
866	02_QM	0.148807	128.867
866	02_QM	0.157898	136.74
866	02_QM	0.106262	92.0232
866	02_QM	0.122605	106.176
866	02_QM	0.134399	116.389
866	02_QM	0.210287	182.109
866	02_QM	0.242713	210.189
866	02_QM	0.338804	293.405
866	02_QM	0.152968	132.47
866	02_QM	0.310972	269.302
866	02_QM	0.309125	267.702
866	02_QM	0.302123	261.638
866	02_QM	0.319138	276.373
866	02_QM	0.246237	213.241
866	02_QM	0.30524	264.338
866	02_QM	0.320504	277.557
866	02_QM	0.179915	155.806
866	02_QM	0.372766	322.815
866	02_QM	0.292855	253.613
866	02_QM	0.238763	206.769
866	02_QM	0.146261	126.662
866	02_QM	0.154864	134.112
866	02_QM	0.195552	169.348
866	02_QM	0.239895	207.749
866	02_QM	0.349346	302.534
866	02_QM	0.334438	289.623
866	02_QM	0.371314	321.558
866	02_QM	0.278968	241.586
866	02_QM	0.397731	344.435
866	02_QM	0.23953	207.433
866	02_QM	0.369741	320.196
866	02_QM	0.340942	295.256
866	02_QM	0.275644	238.707
866	02_QM	0.217284	188.168
866	02_QM	0.571878	495.246
866	02_QM	0.323991	280.576
1098	02_QM	0.241166	264.801
1098	02_QM	0.19791	217.305
1098	02_QM	0.135415	148.685
1098	02_QM	0.149039	163.645
1098	02_QM	0.144118	158.241
1098	02_QM	0.152103	167.009
1098	02_QM	0.162785	178.738
1098	02_QM	0.31135	341.862
1098	02_QM	0.265133	291.116
1098	02_QM	0.278713	306.027
1098	02_QM	0.339251	372.498
1098	02_QM	0.159972	175.649
1098	02_QM	0.199491	219.041
1098	02_QM	0.241381	265.036
1098	02_QM	0.126658	139.07
1098	02_QM	0.275724	302.745
1098	02_QM	0.177612	195.018
1098	02_QM	0.166331	182.631
1098	02_QM	0.136943	150.364
1098	02_QM	0.162827	178.784
1098	02_QM	0.200262	219.888
1098	02_QM	0.175045	192.199
1098	02_QM	0.167701	184.136
1098	02_QM	0.215016	236.087
1098	02_QM	0.230301	252.87
1098	02_QM	0.242128	265.856
1098	02_QM	0.243157	266.986
1098	02_QM	0.149289	163.92
1098	02_QM	0.244251	268.187
1098	02_QM	0.209073	229.562
1098	02_QM	0.176955	194.297
1098	02_QM	0.249733	274.207
1098	02_QM	0.203998	223.99
1098	02_QM	0.25307	277.871
1098	02_QM	0.205776	225.942
1098	02_QM	0.255344	280.367
1098	02_QM	0.22727	249.542
1098	02_QM	0.227398	249.683
1098	02_QM	0.182368	200.241
1098	02_QM	0.250331	274.864
1098	02_QM	0.145612	159.882
1098	02_QM	0.0976097	107.175
1098	02_QM	0.138867	152.476
1098	02_QM	0.199128	218.643
1098	02_QM	0.178736	196.252
1098	02_QM	0.240678	264.265
1098	02_QM	0.195546	214.71
1098	02_QM	0.251457	276.1
1098	02_QM	0.218305	239.699
1098	02_QM	0.247243	271.473
1098	02_QM	0.230877	253.503
1098	02_QM	0.181016	198.755
1098	02_QM	0.128933	141.568
1098	02_QM	0.140041	153.765
1098	02_QM	0.189278	207.827
1098	02_QM	0.234909	257.93
1098	02_QM	0.278387	305.669
1098	02_QM	0.206521	226.76
1098	02_QM	0.16952	186.133
1098	02_QM	0.19314	212.068
1098	02_QM	0.23529	258.349
1098	02_QM	0.250061	274.567
1098	02_QM	0.219278	240.767
1098	02_QM	0.187546	205.925
1098	02_QM	0.13945	153.117
1098	02_QM	0.144273	158.411
1098	02_QM	0.130892	143.719
1098	02_QM	0.262669	288.411
1098	02_QM	0.209167	229.665
1098	02_QM	0.1309	143.729
1098	02_QM	0.104471	114.709
1098	02_QM	0.132557	145.548
1098	02_QM	0.163222	179.217
1098	02_QM	0.132188	145.143
1098	02_QM	0.163295	179.298
1098	02_QM	0.196662	215.935
1098	02_QM	0.284148	311.994
1098	02_QM	0.112087	123.071
1098	02_QM	0.224074	246.034
1098	02_QM	0.231735	254.445
1098	02_QM	0.232728	255.535
1098	02_QM	0.264478	290.396
1098	02_QM	0.195699	214.878
1098	02_QM	0.258944	284.32
1098	02_QM	0.250105	274.615
1098	02_QM	0.139536	153.211
1098	02_QM	0.285408	313.378
1098	02_QM	0.237028	260.257
1098	02_QM	0.167261	183.653
1098	02_QM	0.138286	151.838
1098	02_QM	0.103403	113.537
1098	02_QM	0.150318	165.049
1098	02_QM	0.178767	196.286
1098	02_QM	0.301141	330.653
1098	02_QM	0.267392	293.596
1098	02_QM	0.291603	320.18
1098	02_QM	0.217693	239.027
[truncated: 989 more rows]

## Sheet: -N
Light	Line	QY	ETR
27	01_qrt	0.38	10.26
27	01_qrt	0.55	14.85
27	01_qrt	0.36	9.72
27	01_qrt	0.28	7.56
27	01_qrt	0.48	12.96
27	01_qrt	0.47	12.69
27	01_qrt	0.46	12.42
27	01_qrt	0.69	18.63
27	01_qrt	0.51	13.77
27	01_qrt	0.22	5.94
27	01_qrt	0.27	7.29
27	01_qrt	0.24	6.48
27	01_qrt	0.27	7.29
27	01_qrt	0.26	7.02
27	01_qrt	0.33	8.91
27	01_qrt	0.64	17.28
27	01_qrt	0.21	5.67
27	01_qrt	0.37	9.99
27	01_qrt	0.42	11.34
27	01_qrt	0.51	13.77
27	01_qrt	0.31	8.37
27	01_qrt	0.39	10.53
27	01_qrt	0.43	11.61
27	01_qrt	0.59	15.93
27	01_qrt	0.5	13.5
27	01_qrt	0.43	11.61
27	01_qrt	0.45	12.15
27	01_qrt	0.37	9.99
27	01_qrt	0.44	11.88
27	01_qrt	0.41	11.07
27	01_qrt	0.44	11.88
27	01_qrt	0.32	8.64
27	01_qrt	0.24	6.48
27	01_qrt	0.28	7.56
27	01_qrt	0.59	15.93
27	01_qrt	0.05	1.35
27	01_qrt	0.53	14.31
27	01_qrt	0.42	11.34
27	01_qrt	0.38	10.26
27	01_qrt	0.34	9.18
27	01_qrt	0.35	9.45
27	01_qrt	0.37	9.99
27	01_qrt	0.47	12.69
27	01_qrt	0.11	2.97
27	01_qrt	0.43	11.61
27	01_qrt	0.49	13.23
27	01_qrt	0.47	12.69
27	01_qrt	0.44	11.88
27	01_qrt	0.39	10.53
27	01_qrt	0.39	10.53
27	01_qrt	0.34	9.18
27	01_qrt	0.19	5.13
27	01_qrt	0.39	10.53
27	01_qrt	0.59	15.93
27	01_qrt	0.28	7.56
27	01_qrt	0.21	5.67
27	01_qrt	0.6	16.2
27	01_qrt	0.47	12.69
27	01_qrt	0.39	10.53
27	01_qrt	0.54	14.58
27	01_qrt	0.48	12.96
27	01_qrt	0.41	11.07
27	01_qrt	0.42	11.34
27	01_qrt	-0.2	-5.4
27	01_qrt	0.34	9.18
27	01_qrt	0.34	9.18
27	01_qrt	0.44	11.88
27	01_qrt	0.31	8.37
27	01_qrt	0.42	11.34
27	01_qrt	0.3	8.1
27	01_qrt	0.27	7.29
27	01_qrt	0.46	12.42
65	01_qrt	0.36	23.4
65	01_qrt	0.54	35.1
65	01_qrt	0.32	20.8
65	01_qrt	0.28	18.2
65	01_qrt	0.47	30.55
65	01_qrt	0.43	27.95
65	01_qrt	0.4	26
65	01_qrt	0.67	43.55
65	01_qrt	0.46	29.9
65	01_qrt	0.11	7.15
65	01_qrt	0.3	19.5
65	01_qrt	0.18	11.7
65	01_qrt	0.23	14.95
65	01_qrt	0.2	13
65	01_qrt	0.26	16.9
65	01_qrt	0.59	38.35
65	01_qrt	0.14	9.1
65	01_qrt	0.33	21.45
65	01_qrt	0.39	25.35
65	01_qrt	0.46	29.9
65	01_qrt	0.33	21.45
65	01_qrt	0.35	22.75
65	01_qrt	0.37	24.05
65	01_qrt	0.52	33.8
65	01_qrt	0.44	28.6
65	01_qrt	0.36	23.4
65	01_qrt	0.39	25.35
65	01_qrt	0.3	19.5
65	01_qrt	0.41	26.65
65	01_qrt	0.39	25.35
65	01_qrt	0.38	24.7
65	01_qrt	0.28	18.2
65	01_qrt	0.17	11.05
65	01_qrt	0.2	13
65	01_qrt	0.51	33.15
65	01_qrt	0.04	2.6
65	01_qrt	0.5	32.5
65	01_qrt	0.39	25.35
65	01_qrt	0.3	19.5
65	01_qrt	0.29	18.85
65	01_qrt	0.35	22.75
65	01_qrt	0.3	19.5
65	01_qrt	0.43	27.95
65	01_qrt	0.09	5.85
65	01_qrt	0.41	26.65
65	01_qrt	0.44	28.6
65	01_qrt	0.45	29.25
65	01_qrt	0.37	24.05
65	01_qrt	0.36	23.4
65	01_qrt	0.34	22.1
65	01_qrt	0.31	20.15
65	01_qrt	0.13	8.45
65	01_qrt	0.37	24.05
65	01_qrt	0.56	36.4
65	01_qrt	0.23	14.95
65	01_qrt	0.2	13
65	01_qrt	0.58	37.7
65	01_qrt	0.45	29.25
65	01_qrt	0.32	20.8
65	01_qrt	0.5	32.5
65	01_qrt	0.43	27.95
65	01_qrt	0.35	22.75
65	01_qrt	0.42	27.3
65	01_qrt	-0.14	-9.1
65	01_qrt	0.27	17.55
65	01_qrt	0.33	21.45
65	01_qrt	0.41	26.65
65	01_qrt	0.32	20.8
65	01_qrt	0.42	27.3
65	01_qrt	0.24	15.6
65	01_qrt	0.26	16.9
65	01_qrt	0.44	28.6
124	01_qrt	0.28	34.72
124	01_qrt	0.44	54.56
124	01_qrt	0.21	26.04
124	01_qrt	0.18	22.32
124	01_qrt	0.41	50.84
124	01_qrt	0.35	43.4
124	01_qrt	0.27	33.48
124	01_qrt	0.62	76.88
124	01_qrt	0.35	43.4
124	01_qrt	0.04	4.96
124	01_qrt	0.23	28.52
124	01_qrt	0.12	14.88
124	01_qrt	0.15	18.6
124	01_qrt	0.12	14.88
124	01_qrt	0.17	21.08
124	01_qrt	0.44	54.56
124	01_qrt	0.12	14.88
124	01_qrt	0.23	28.52
124	01_qrt	0.29	35.96
124	01_qrt	0.37	45.88
124	01_qrt	0.24	29.76
124	01_qrt	0.22	27.28
124	01_qrt	0.24	29.76
124	01_qrt	0.41	50.84
124	01_qrt	0.34	42.16
124	01_qrt	0.28	34.72
124	01_qrt	0.31	38.44
124	01_qrt	0.2	24.8
124	01_qrt	0.33	40.92
124	01_qrt	0.33	40.92
124	01_qrt	0.27	33.48
124	01_qrt	0.21	26.04
124	01_qrt	0.06	7.44
124	01_qrt	0.11	13.64
124	01_qrt	0.38	47.12
124	01_qrt	0.05	6.2
124	01_qrt	0.42	52.08
124	01_qrt	0.3	37.2
124	01_qrt	0.2	24.8
124	01_qrt	0.21	26.04
124	01_qrt	0.33	40.92
124	01_qrt	0.19	23.56
124	01_qrt	0.32	39.68
124	01_qrt	0.04	4.96
124	01_qrt	0.31	38.44
124	01_qrt	0.32	39.68
124	01_qrt	0.37	45.88
124	01_qrt	0.27	33.48
124	01_qrt	0.28	34.72
124	01_qrt	0.25	31
124	01_qrt	0.26	32.24
124	01_qrt	0.07	8.68
124	01_qrt	0.28	34.72
124	01_qrt	0.51	63.24
124	01_qrt	0.13	16.12
124	01_qrt	0.16	19.84
124	01_qrt	0.47	58.28
124	01_qrt	0.41	50.84
124	01_qrt	0.25	31
124	01_qrt	0.42	52.08
124	01_qrt	0.27	33.48
124	01_qrt	0.26	32.24
124	01_qrt	0.4	49.6
124	01_qrt	-0.08	-9.92
124	01_qrt	0.16	19.84
124	01_qrt	0.25	31
124	01_qrt	0.29	35.96
124	01_qrt	0.23	28.52
124	01_qrt	0.35	43.4
124	01_qrt	0.15	18.6
124	01_qrt	0.2	24.8
124	01_qrt	0.39	48.36
217	01_qrt	0.18	39.06
217	01_qrt	0.31	67.27
217	01_qrt	0.12	26.04
217	01_qrt	0.12	26.04
217	01_qrt	0.31	67.27
217	01_qrt	0.25	54.25
217	01_qrt	0.19	41.23
217	01_qrt	0.49	106.33
217	01_qrt	0.23	49.91
217	01_qrt	0.05	10.85
217	01_qrt	0.12	26.04
217	01_qrt	0.06	13.02
217	01_qrt	0.07	15.19
217	01_qrt	0.04	8.68
217	01_qrt	0.09	19.53
217	01_qrt	0.31	67.27
217	01_qrt	0.1	21.7
217	01_qrt	0.15	32.55
217	01_qrt	0.19	41.23
217	01_qrt	0.24	52.08
217	01_qrt	0.14	30.38
217	01_qrt	0.13	28.21
217	01_qrt	0.14	30.38
217	01_qrt	0.28	60.76
217	01_qrt	0.21	45.57
217	01_qrt	0.18	39.06
217	01_qrt	0.2	43.4
217	01_qrt	0.11	23.87
217	01_qrt	0.24	52.08
217	01_qrt	0.23	49.91
217	01_qrt	0.19	41.23
217	01_qrt	0.13	28.21
217	01_qrt	0	0
217	01_qrt	0.07	15.19
217	01_qrt	0.26	56.42
217	01_qrt	0.03	6.51
217	01_qrt	0.28	60.76
217	01_qrt	0.2	43.4
217	01_qrt	0.1	21.7
217	01_qrt	0.13	28.21
217	01_qrt	0.26	56.42
217	01_qrt	0.1	21.7
217	01_qrt	0.21	45.57
217	01_qrt	0.04	8.68
217	01_qrt	0.21	45.57
217	01_qrt	0.19	41.23
217	01_qrt	0.28	60.76
217	01_qrt	0.19	41.23
217	01_qrt	0.19	41.23
217	01_qrt	0.16	34.72
217	01_qrt	0.16	34.72
217	01_qrt	0.07	15.19
217	01_qrt	0.21	45.57
217	01_qrt	0.38	82.46
217	01_qrt	0.08	17.36
217	01_qrt	0.1	21.7
217	01_qrt	0.34	73.78
217	01_qrt	0.31	67.27
217	01_qrt	0.16	34.72
217	01_qrt	0.3	65.1
217	01_qrt	0.2	43.4
217	01_qrt	0.18	39.06
217	01_qrt	0.29	62.93
217	01_qrt	-0.05	-10.85
217	01_qrt	0.07	15.19
217	01_qrt	0.16	34.72
217	01_qrt	0.22	47.74
217	01_qrt	0.13	28.21
217	01_qrt	0.27	58.59
217	01_qrt	0.08	17.36
217	01_qrt	0.11	23.87
217	01_qrt	0.26	56.42
325	01_qrt	0.14	45.5
325	01_qrt	0.23	74.75
325	01_qrt	0.08	26
325	01_qrt	0.07	22.75
325	01_qrt	0.24	78
325	01_qrt	0.16	52
325	01_qrt	0.14	45.5
325	01_qrt	0.45	146.25
325	01_qrt	0.18	58.5
325	01_qrt	-0.01	-3.25
325	01_qrt	0.08	26
325	01_qrt	0.05	16.25
325	01_qrt	0.06	19.5
325	01_qrt	0.02	6.5
325	01_qrt	0.05	16.25
325	01_qrt	0.21	68.25
325	01_qrt	0.05	16.25
325	01_qrt	0.1	32.5
325	01_qrt	0.13	42.25
325	01_qrt	0.18	58.5
325	01_qrt	0.11	35.75
325	01_qrt	0.09	29.25
325	01_qrt	0.13	42.25
325	01_qrt	0.17	55.25
325	01_qrt	0.17	55.25
325	01_qrt	0.14	45.5
325	01_qrt	0.17	55.25
325	01_qrt	0.06	19.5
325	01_qrt	0.17	55.25
325	01_qrt	0.15	48.75
325	01_qrt	0.15	48.75
325	01_qrt	0.1	32.5
325	01_qrt	-0.02	-6.5
325	01_qrt	0.03	9.75
325	01_qrt	0.19	61.75
325	01_qrt	0.02	6.5
325	01_qrt	0.21	68.25
325	01_qrt	0.14	45.5
325	01_qrt	0.1	32.5
325	01_qrt	0.08	26
325	01_qrt	0.2	65
325	01_qrt	0.06	19.5
325	01_qrt	0.17	55.25
325	01_qrt	-0.01	-3.25
325	01_qrt	0.17	55.25
325	01_qrt	0.17	55.25
325	01_qrt	0.21	68.25
325	01_qrt	0.18	58.5
325	01_qrt	0.14	45.5
325	01_qrt	0.12	39
325	01_qrt	0.12	39
325	01_qrt	0.02	6.5
325	01_qrt	0.11	35.75
325	01_qrt	0.3	97.5
325	01_qrt	0.05	16.25
325	01_qrt	0.07	22.75
325	01_qrt	0.25	81.25
325	01_qrt	0.25	81.25
325	01_qrt	0.12	39
325	01_qrt	0.2	65
325	01_qrt	0.15	48.75
325	01_qrt	0.14	45.5
325	01_qrt	0.19	61.75
325	01_qrt	-0.04	-13
325	01_qrt	0.04	13
325	01_qrt	0.11	35.75
325	01_qrt	0.14	45.5
325	01_qrt	0.09	29.25
325	01_qrt	0.2	65
325	01_qrt	0.06	19.5
325	01_qrt	0.08	26
325	01_qrt	0.24	78
480	01_qrt	0.09	43.2
480	01_qrt	0.16	76.8
480	01_qrt	0.05	24
480	01_qrt	0.06	28.8
480	01_qrt	0.14	67.2
480	01_qrt	0.12	57.6
480	01_qrt	0.11	52.8
480	01_qrt	0.31	148.8
480	01_qrt	0.13	62.4
480	01_qrt	0.03	14.4
480	01_qrt	0.06	28.8
480	01_qrt	0.03	14.4
480	01_qrt	0.04	19.2
480	01_qrt	0.03	14.4
480	01_qrt	0.05	24
480	01_qrt	0.15	72
480	01_qrt	0.01	4.8
480	01_qrt	0.09	43.2
480	01_qrt	0.08	38.4
480	01_qrt	0.11	52.8
480	01_qrt	0.07	33.6
480	01_qrt	0.06	28.8
480	01_qrt	0.06	28.8
480	01_qrt	0.14	67.2
480	01_qrt	0.06	28.8
480	01_qrt	0.12	57.6
480	01_qrt	0.1	48
480	01_qrt	0.04	19.2
480	01_qrt	0.1	48
480	01_qrt	0.09	43.2
480	01_qrt	0.08	38.4
480	01_qrt	0.06	28.8
480	01_qrt	-0.01	-4.8
480	01_qrt	0.02	9.6
480	01_qrt	0.1	48
480	01_qrt	0.01	4.8
480	01_qrt	0.14	67.2
480	01_qrt	0.07	33.6
480	01_qrt	0.04	19.2
480	01_qrt	0.06	28.8
480	01_qrt	0.13	62.4
480	01_qrt	0.05	24
480	01_qrt	0.09	43.2
480	01_qrt	0.01	4.8
480	01_qrt	0.09	43.2
480	01_qrt	0.11	52.8
480	01_qrt	0.11	52.8
480	01_qrt	0.11	52.8
480	01_qrt	0.08	38.4
480	01_qrt	0.08	38.4
480	01_qrt	0.08	38.4
480	01_qrt	-0.01	-4.8
480	01_qrt	0.07	33.6
480	01_qrt	0.2	96
480	01_qrt	0.03	14.4
480	01_qrt	0.04	19.2
480	01_qrt	0.17	81.6
480	01_qrt	0.17	81.6
480	01_qrt	0.09	43.2
480	01_qrt	0.15	72
480	01_qrt	0.09	43.2
480	01_qrt	0.09	43.2
480	01_qrt	0.14	67.2
480	01_qrt	-0.02	-9.6
480	01_qrt	0.02	9.6
480	01_qrt	0.08	38.4
480	01_qrt	0.11	52.8
480	01_qrt	0.07	33.6
480	01_qrt	0.14	67.2
480	01_qrt	0.02	9.6
480	01_qrt	0.05	24
480	01_qrt	0.12	57.6
665	01_qrt	0.06	39.9
665	01_qrt	0.12	79.8
665	01_qrt	0.05	33.25
665	01_qrt	0.02	13.3
665	01_qrt	0.12	79.8
665	01_qrt	0.1	66.5
665	01_qrt	0.07	46.55
665	01_qrt	0.19	126.35
665	01_qrt	0.1	66.5
665	01_qrt	0.04	26.6
665	01_qrt	0.05	33.25
665	01_qrt	0.01	6.65
665	01_qrt	0.02	13.3
665	01_qrt	0.02	13.3
665	01_qrt	0.01	6.65
665	01_qrt	0.13	86.45
665	01_qrt	-0.01	-6.65
665	01_qrt	0.07	46.55
665	01_qrt	0.06	39.9
665	01_qrt	0.08	53.2
665	01_qrt	0.05	33.25
665	01_qrt	0.04	26.6
665	01_qrt	0.07	46.55
665	01_qrt	0.07	46.55
665	01_qrt	0.05	33.25
665	01_qrt	0.09	59.85
665	01_qrt	0.07	46.55
665	01_qrt	0.04	26.6
665	01_qrt	0.1	66.5
665	01_qrt	0.07	46.55
665	01_qrt	0.09	59.85
665	01_qrt	0.04	26.6
665	01_qrt	0.01	6.65
665	01_qrt	-0.01	-6.65
665	01_qrt	0.09	59.85
665	01_qrt	-0.01	-6.65
665	01_qrt	0.12	79.8
665	01_qrt	0.05	33.25
665	01_qrt	0.04	26.6
665	01_qrt	0.05	33.25
665	01_qrt	0.09	59.85
665	01_qrt	0.04	26.6
665	01_qrt	0.09	59.85
665	01_qrt	0.03	19.95
665	01_qrt	0.07	46.55
665	01_qrt	0.1	66.5
665	01_qrt	0.11	73.15
665	01_qrt	0.08	53.2
665	01_qrt	0.08	53.2
665	01_qrt	0.04	26.6
665	01_qrt	0.06	39.9
665	01_qrt	0.09	59.85
665	01_qrt	0.03	19.95
665	01_qrt	0.16	106.4
665	01_qrt	0	0
665	01_qrt	0.05	33.25
665	01_qrt	0.11	73.15
665	01_qrt	0.13	86.45
665	01_qrt	0.06	39.9
665	01_qrt	0.09	59.85
665	01_qrt	0.05	33.25
665	01_qrt	0.03	19.95
665	01_qrt	0.08	53.2
665	01_qrt	-0.03	-19.95
665	01_qrt	0.01	6.65
665	01_qrt	0.06	39.9
665	01_qrt	0.07	46.55
665	01_qrt	0.07	46.55
665	01_qrt	0.11	73.15
665	01_qrt	0.02	13.3
665	01_qrt	0.02	13.3
665	01_qrt	0.06	39.9
866	01_qrt	0.06	51.96
866	01_qrt	0.09	77.94
866	01_qrt	0.04	34.64
866	01_qrt	0.02	17.32
866	01_qrt	0.1	86.6
866	01_qrt	0.08	69.28
866	01_qrt	0.06	51.96
866	01_qrt	0.16	138.56
866	01_qrt	0.07	60.62
866	01_qrt	0.05	43.3
866	01_qrt	0.05	43.3
866	01_qrt	0	0
866	01_qrt	0.04	34.64
866	01_qrt	0.03	25.98
866	01_qrt	0.02	17.32
866	01_qrt	0.1	86.6
866	01_qrt	0.03	25.98
866	01_qrt	0.08	69.28
866	01_qrt	0.07	60.62
866	01_qrt	0.07	60.62
866	01_qrt	0.05	43.3
866	01_qrt	0.05	43.3
866	01_qrt	0.07	60.62
866	01_qrt	0.09	77.94
866	01_qrt	0.09	77.94
866	01_qrt	0.08	69.28
866	01_qrt	-0.04	-34.64
866	01_qrt	0.03	25.98
866	01_qrt	0.08	69.28
866	01_qrt	0.05	43.3
866	01_qrt	0.06	51.96
866	01_qrt	0.03	25.98
866	01_qrt	0.01	8.66
866	01_qrt	0.01	8.66
866	01_qrt	0.08	69.28
866	01_qrt	-0.04	-34.64
866	01_qrt	0.06	51.96
866	01_qrt	0.06	51.96
866	01_qrt	0.04	34.64
866	01_qrt	0.03	25.98
866	01_qrt	0.06	51.96
866	01_qrt	0.04	34.64
866	01_qrt	0.04	34.64
866	01_qrt	-0.02	-17.32
866	01_qrt	0.04	34.64
866	01_qrt	0.06	51.96
866	01_qrt	0.1	86.6
866	01_qrt	0.02	17.32
866	01_qrt	0.06	51.96
866	01_qrt	0.03	25.98
866	01_qrt	0.04	34.64
866	01_qrt	0.06	51.96
866	01_qrt	0.04	34.64
866	01_qrt	0.1	86.6
866	01_qrt	0.01	8.66
866	01_qrt	0.03	25.98
866	01_qrt	0.09	77.94
866	01_qrt	0.11	95.26
866	01_qrt	0.06	51.96
866	01_qrt	0.07	60.62
866	01_qrt	0.06	51.96
866	01_qrt	0.04	34.64
866	01_qrt	0.07	60.62
866	01_qrt	-0.02	-17.32
866	01_qrt	0.05	43.3
866	01_qrt	0.06	51.96
866	01_qrt	0.11	95.26
866	01_qrt	0.03	25.98
866	01_qrt	0.08	69.28
866	01_qrt	0.03	25.98
866	01_qrt	0.03	25.98
866	01_qrt	-0.02	-17.32
1098	01_qrt	0.05	54.9
1098	01_qrt	0.08	87.84
1098	01_qrt	0.03	32.94
1098	01_qrt	0	0
1098	01_qrt	0.07	76.86
1098	01_qrt	0.04	43.92
1098	01_qrt	0.06	65.88
1098	01_qrt	0.19	208.62
1098	01_qrt	0.06	65.88
1098	01_qrt	0.05	54.9
1098	01_qrt	0.03	32.94
1098	01_qrt	0	0
1098	01_qrt	0	0
1098	01_qrt	0.02	21.96
1098	01_qrt	0.04	43.92
1098	01_qrt	0.08	87.84
1098	01_qrt	0	0
1098	01_qrt	0.04	43.92
1098	01_qrt	0.04	43.92
1098	01_qrt	0.05	54.9
1098	01_qrt	0.06	65.88
1098	01_qrt	0.03	32.94
1098	01_qrt	0.07	76.86
1098	01_qrt	0.07	76.86
1098	01_qrt	0.04	43.92
1098	01_qrt	0.07	76.86
1098	01_qrt	-0.01	-10.98
1098	01_qrt	0.02	21.96
1098	01_qrt	0.05	54.9
1098	01_qrt	0.05	54.9
1098	01_qrt	0.02	21.96
1098	01_qrt	0.02	21.96
1098	01_qrt	0.03	32.94
1098	01_qrt	0.01	10.98
1098	01_qrt	0.06	65.88
1098	01_qrt	0.03	32.94
1098	01_qrt	0.07	76.86
1098	01_qrt	0.03	32.94
1098	01_qrt	0.03	32.94
1098	01_qrt	0.04	43.92
1098	01_qrt	0.04	43.92
1098	01_qrt	0.04	43.92
1098	01_qrt	0.02	21.96
1098	01_qrt	-0.01	-10.98
1098	01_qrt	0.06	65.88
1098	01_qrt	0.08	87.84
1098	01_qrt	0.07	76.86
1098	01_qrt	0.03	32.94
1098	01_qrt	0.05	54.9
1098	01_qrt	0.04	43.92
1098	01_qrt	0.02	21.96
1098	01_qrt	-0.06	-65.88
1098	01_qrt	0.04	43.92
1098	01_qrt	0.09	98.82
1098	01_qrt	0.02	21.96
1098	01_qrt	0.01	10.98
1098	01_qrt	0.07	76.86
1098	01_qrt	0.08	87.84
1098	01_qrt	0.02	21.96
1098	01_qrt	0.06	65.88
1098	01_qrt	0.07	76.86
1098	01_qrt	0.04	43.92
1098	01_qrt	0.07	76.86
1098	01_qrt	-0.03	-32.94
1098	01_qrt	0.03	32.94
1098	01_qrt	0.04	43.92
1098	01_qrt	0.09	98.82
1098	01_qrt	0.01	10.98
1098	01_qrt	0.07	76.86
1098	01_qrt	0.04	43.92
1098	01_qrt	0.04	43.92
1098	01_qrt	0.03	32.94
27	02_rsh1	0.46	12.42
27	02_rsh1	0.38	10.26
27	02_rsh1	0.44	11.88
27	02_rsh1	0.41	11.07
27	02_rsh1	0.38	10.26
27	02_rsh1	0.44	11.88
27	02_rsh1	0.44	11.88
27	02_rsh1	0.29	7.83
27	02_rsh1	0.18	4.86
27	02_rsh1	0.51	13.77
27	02_rsh1	0.33	8.91
27	02_rsh1	0.05	1.35
27	02_rsh1	0.33	8.91
27	02_rsh1	0.1	2.7
27	02_rsh1	0.29	7.83
27	02_rsh1	0.61	16.47
27	02_rsh1	0.36	9.72
27	02_rsh1	0.24	6.48
27	02_rsh1	0.27	7.29
27	02_rsh1	0.48	12.96
27	02_rsh1	0.17	4.59
27	02_rsh1	0.4	10.8
27	02_rsh1	0.22	5.94
27	02_rsh1	0.23	6.21
27	02_rsh1	0.33	8.91
27	02_rsh1	0.14	3.78
27	02_rsh1	0.22	5.94
27	02_rsh1	0.34	9.18
27	02_rsh1	0.06	1.62
27	02_rsh1	0.25	6.75
27	02_rsh1	0.17	4.59
27	02_rsh1	0.29	7.83
27	02_rsh1	0.08	2.16
27	02_rsh1	0.3	8.1
27	02_rsh1	0.12	3.24
27	02_rsh1	0.24	6.48
27	02_rsh1	0.06	1.62
27	02_rsh1	0.4	10.8
27	02_rsh1	0.32	8.64
27	02_rsh1	0.24	6.48
27	02_rsh1	0.3	8.1
27	02_rsh1	0.31	8.37
27	02_rsh1	0.4	10.8
27	02_rsh1	0.3	8.1
27	02_rsh1	0.22	5.94
27	02_rsh1	0.25	6.75
27	02_rsh1	0.36	9.72
27	02_rsh1	0.33	8.91
27	02_rsh1	0.21	5.67
27	02_rsh1	0.31	8.37
27	02_rsh1	0.09	2.43
27	02_rsh1	0.19	5.13
27	02_rsh1	0.2	5.4
27	02_rsh1	0.14	3.78
27	02_rsh1	0.32	8.64
27	02_rsh1	0.28	7.56
27	02_rsh1	0.15	4.05
27	02_rsh1	0.08	2.16
27	02_rsh1	0.33	8.91
27	02_rsh1	0.16	4.32
27	02_rsh1	0.1	2.7
27	02_rsh1	0.09	2.43
27	02_rsh1	0.16	4.32
27	02_rsh1	0.23	6.21
27	02_rsh1	0.33	8.91
27	02_rsh1	0.37	9.99
27	02_rsh1	0.1	2.7
27	02_rsh1	0.21	5.67
27	02_rsh1	0.14	3.78
27	02_rsh1	0.28	7.56
27	02_rsh1	0.09	2.43
27	02_rsh1	0.22	5.94
27	02_rsh1	0.21	5.67
27	02_rsh1	0.33	8.91
27	02_rsh1	0.34	9.18
27	02_rsh1	0.24	6.48
65	02_rsh1	0.38	24.7
65	02_rsh1	0.35	22.75
65	02_rsh1	0.42	27.3
65	02_rsh1	0.41	26.65
65	02_rsh1	0.35	22.75
65	02_rsh1	0.4	26
65	02_rsh1	0.38	24.7
65	02_rsh1	0.25	16.25
65	02_rsh1	0.13	8.45
65	02_rsh1	0.52	33.8
65	02_rsh1	0.28	18.2
65	02_rsh1	0.03	1.95
65	02_rsh1	0.29	18.85
65	02_rsh1	0.08	5.2
65	02_rsh1	0.26	16.9
65	02_rsh1	0.59	38.35
65	02_rsh1	0.34	22.1
65	02_rsh1	0.2	13
65	02_rsh1	0.2	13
65	02_rsh1	0.45	29.25
65	02_rsh1	0.13	8.45
65	02_rsh1	0.33	21.45
65	02_rsh1	0.19	12.35
65	02_rsh1	0.18	11.7
65	02_rsh1	0.28	18.2
65	02_rsh1	0.08	5.2
65	02_rsh1	0.17	11.05
65	02_rsh1	0.34	22.1
65	02_rsh1	0.09	5.85
65	02_rsh1	0.23	14.95
65	02_rsh1	0.14	9.1
65	02_rsh1	0.23	14.95
65	02_rsh1	0.08	5.2
65	02_rsh1	0.28	18.2
65	02_rsh1	0.14	9.1
65	02_rsh1	0.21	13.65
65	02_rsh1	0.02	1.3
65	02_rsh1	0.34	22.1
65	02_rsh1	0.29	18.85
65	02_rsh1	0.18	11.7
65	02_rsh1	0.28	18.2
65	02_rsh1	0.27	17.55
65	02_rsh1	0.31	20.15
65	02_rsh1	0.24	15.6
65	02_rsh1	0.16	10.4
65	02_rsh1	0.2	13
65	02_rsh1	0.33	21.45
65	02_rsh1	0.3	19.5
65	02_rsh1	0.16	10.4
65	02_rsh1	0.28	18.2
65	02_rsh1	0.07	4.55
65	02_rsh1	0.16	10.4
65	02_rsh1	0.16	10.4
65	02_rsh1	0.1	6.5
65	02_rsh1	0.26	16.9
65	02_rsh1	0.25	16.25
65	02_rsh1	0.11	7.15
65	02_rsh1	0.06	3.9
65	02_rsh1	0.31	20.15
65	02_rsh1	0.13	8.45
65	02_rsh1	0.06	3.9
65	02_rsh1	0.07	4.55
65	02_rsh1	0.13	8.45
65	02_rsh1	0.17	11.05
65	02_rsh1	0.33	21.45
65	02_rsh1	0.33	21.45
65	02_rsh1	0.08	5.2
65	02_rsh1	0.16	10.4
65	02_rsh1	0.09	5.85
65	02_rsh1	0.26	16.9
65	02_rsh1	0.09	5.85
65	02_rsh1	0.17	11.05
65	02_rsh1	0.19	12.35
65	02_rsh1	0.32	20.8
65	02_rsh1	0.35	22.75
65	02_rsh1	0.21	13.65
124	02_rsh1	0.29	35.96
124	02_rsh1	0.26	32.24
124	02_rsh1	0.31	38.44
124	02_rsh1	0.32	39.68
124	02_rsh1	0.26	32.24
124	02_rsh1	0.33	40.92
124	02_rsh1	0.25	31
124	02_rsh1	0.15	18.6
124	02_rsh1	0.09	11.16
124	02_rsh1	0.46	57.04
124	02_rsh1	0.2	24.8
124	02_rsh1	0	0
124	02_rsh1	0.2	24.8
124	02_rsh1	0.05	6.2
124	02_rsh1	0.18	22.32
124	02_rsh1	0.49	60.76
124	02_rsh1	0.25	31
124	02_rsh1	0.15	18.6
124	02_rsh1	0.13	16.12
124	02_rsh1	0.33	40.92
124	02_rsh1	0.08	9.92
124	02_rsh1	0.22	27.28
124	02_rsh1	0.12	14.88
124	02_rsh1	0.14	17.36
124	02_rsh1	0.17	21.08
124	02_rsh1	0.07	8.68
124	02_rsh1	0.11	13.64
124	02_rsh1	0.29	35.96
124	02_rsh1	0.06	7.44
124	02_rsh1	0.15	18.6
124	02_rsh1	0.1	12.4
124	02_rsh1	0.14	17.36
124	02_rsh1	0.02	2.48
124	02_rsh1	0.19	23.56
124	02_rsh1	0.07	8.68
124	02_rsh1	0.15	18.6
124	02_rsh1	0.01	1.24
124	02_rsh1	0.26	32.24
124	02_rsh1	0.23	28.52
124	02_rsh1	0.13	16.12
124	02_rsh1	0.25	31
124	02_rsh1	0.19	23.56
124	02_rsh1	0.22	27.28
124	02_rsh1	0.15	18.6
124	02_rsh1	0.08	9.92
124	02_rsh1	0.12	14.88
124	02_rsh1	0.25	31
124	02_rsh1	0.21	26.04
124	02_rsh1	0.11	13.64
124	02_rsh1	0.27	33.48
124	02_rsh1	0.05	6.2
124	02_rsh1	0.05	6.2
124	02_rsh1	0.1	12.4
124	02_rsh1	0.06	7.44
124	02_rsh1	0.16	19.84
124	02_rsh1	0.17	21.08
124	02_rsh1	0.06	7.44
124	02_rsh1	0.05	6.2
124	02_rsh1	0.23	28.52
124	02_rsh1	0.06	7.44
124	02_rsh1	0.04	4.96
124	02_rsh1	0.04	4.96
124	02_rsh1	0.08	9.92
124	02_rsh1	0.11	13.64
124	02_rsh1	0.24	29.76
124	02_rsh1	0.23	28.52
124	02_rsh1	0.06	7.44
124	02_rsh1	0.11	13.64
124	02_rsh1	0.02	2.48
124	02_rsh1	0.22	27.28
124	02_rsh1	0.07	8.68
124	02_rsh1	0.1	12.4
124	02_rsh1	0.1	12.4
124	02_rsh1	0.21	26.04
124	02_rsh1	0.32	39.68
124	02_rsh1	0.2	24.8
217	02_rsh1	0.19	41.23
217	02_rsh1	0.17	36.89
217	02_rsh1	0.2	43.4
217	02_rsh1	0.21	45.57
217	02_rsh1	0.17	36.89
217	02_rsh1	0.22	47.74
217	02_rsh1	0.16	34.72
217	02_rsh1	0.1	21.7
217	02_rsh1	0.05	10.85
217	02_rsh1	0.32	69.44
217	02_rsh1	0.15	32.55
217	02_rsh1	-0.01	-2.17
217	02_rsh1	0.13	28.21
217	02_rsh1	0.02	4.34
217	02_rsh1	0.14	30.38
217	02_rsh1	0.45	97.65
217	02_rsh1	0.17	36.89
217	02_rsh1	0.1	21.7
217	02_rsh1	0.06	13.02
217	02_rsh1	0.21	45.57
217	02_rsh1	0.06	13.02
217	02_rsh1	0.13	28.21
217	02_rsh1	0.07	15.19
217	02_rsh1	0.13	28.21
217	02_rsh1	0.11	23.87
217	02_rsh1	0	0
217	02_rsh1	0.06	13.02
217	02_rsh1	0.19	41.23
217	02_rsh1	0.01	2.17
217	02_rsh1	0.1	21.7
217	02_rsh1	0.07	15.19
217	02_rsh1	0.1	21.7
217	02_rsh1	-0.01	-2.17
217	02_rsh1	0.12	26.04
217	02_rsh1	0.07	15.19
217	02_rsh1	0.08	17.36
217	02_rsh1	0.04	8.68
217	02_rsh1	0.15	32.55
217	02_rsh1	0.14	30.38
217	02_rsh1	0.07	15.19
217	02_rsh1	0.16	34.72
217	02_rsh1	0.15	32.55
217	02_rsh1	0.13	28.21
217	02_rsh1	0.08	17.36
217	02_rsh1	0.05	10.85
217	02_rsh1	0.09	19.53
217	02_rsh1	0.16	34.72
217	02_rsh1	0.15	32.55
217	02_rsh1	0.07	15.19
217	02_rsh1	0.19	41.23
217	02_rsh1	0.06	13.02
217	02_rsh1	0.13	28.21
217	02_rsh1	0.04	8.68
217	02_rsh1	0.02	4.34
217	02_rsh1	0.1	21.7
217	02_rsh1	0.11	23.87
217	02_rsh1	0.05	10.85
217	02_rsh1	0.03	6.51
217	02_rsh1	0.14	30.38
217	02_rsh1	0.05	10.85
217	02_rsh1	0.05	10.85
217	02_rsh1	0.03	6.51
217	02_rsh1	0.04	8.68
217	02_rsh1	0.08	17.36
217	02_rsh1	0.15	32.55
217	02_rsh1	0.13	28.21
217	02_rsh1	0.01	2.17
217	02_rsh1	0.06	13.02
217	02_rsh1	-0.01	-2.17
217	02_rsh1	0.12	26.04
217	02_rsh1	0.01	2.17
217	02_rsh1	0.08	17.36
217	02_rsh1	0.04	8.68
217	02_rsh1	0.13	28.21
217	02_rsh1	0.27	58.59
217	02_rsh1	0.11	23.87
325	02_rsh1	0.15	48.75
325	02_rsh1	0.12	39
325	02_rsh1	0.14	45.5
325	02_rsh1	0.15	48.75
325	02_rsh1	0.11	35.75
325	02_rsh1	0.14	45.5
325	02_rsh1	0.11	35.75
325	02_rsh1	0.06	19.5
325	02_rsh1	0.03	9.75
325	02_rsh1	0.23	74.75
325	02_rsh1	0.11	35.75
325	02_rsh1	0	0
325	02_rsh1	0.1	32.5
325	02_rsh1	0.02	6.5
325	02_rsh1	0.12	39
325	02_rsh1	0.34	110.5
325	02_rsh1	0.14	45.5
325	02_rsh1	0.06	19.5
325	02_rsh1	0.04	13
325	02_rsh1	0.15	48.75
325	02_rsh1	0.03	9.75
325	02_rsh1	0.1	32.5
325	02_rsh1	0.04	13
325	02_rsh1	0.12	39
325	02_rsh1	0.07	22.75
325	02_rsh1	0.07	22.75
325	02_rsh1	0.03	9.75
325	02_rsh1	0.12	39
325	02_rsh1	0.04	13
325	02_rsh1	0.07	22.75
325	02_rsh1	0.04	13
325	02_rsh1	0.06	19.5
325	02_rsh1	0.03	9.75
325	02_rsh1	0.06	19.5
325	02_rsh1	0.03	9.75
325	02_rsh1	0.03	9.75
325	02_rsh1	-0.01	-3.25
325	02_rsh1	0.13	42.25
325	02_rsh1	0.1	32.5
325	02_rsh1	0.06	19.5
325	02_rsh1	0.11	35.75
325	02_rsh1	0.07	22.75
325	02_rsh1	0.08	26
325	02_rsh1	0.07	22.75
325	02_rsh1	0.05	16.25
325	02_rsh1	0.05	16.25
325	02_rsh1	0.12	39
325	02_rsh1	0.09	29.25
325	02_rsh1	0.07	22.75
325	02_rsh1	0.13	42.25
325	02_rsh1	0.03	9.75
325	02_rsh1	0.04	13
325	02_rsh1	0.06	19.5
325	02_rsh1	0	0
325	02_rsh1	0.07	22.75
325	02_rsh1	0.08	26
325	02_rsh1	0.02	6.5
325	02_rsh1	0.01	3.25
325	02_rsh1	0.1	32.5
325	02_rsh1	0.02	6.5
325	02_rsh1	0.03	9.75
325	02_rsh1	0.03	9.75
325	02_rsh1	0.02	6.5
325	02_rsh1	0.06	19.5
325	02_rsh1	0.11	35.75
325	02_rsh1	0.12	39
325	02_rsh1	0	0
325	02_rsh1	0.04	13
325	02_rsh1	-0.05	-16.25
325	02_rsh1	0.08	26
325	02_rsh1	0.04	13
325	02_rsh1	0.05	16.25
325	02_rsh1	0.06	19.5
325	02_rsh1	0.14	45.5
325	02_rsh1	0.21	68.25
325	02_rsh1	0.09	29.25
480	02_rsh1	0.11	52.8
480	02_rsh1	0.09	43.2
480	02_rsh1	0.1	48
480	02_rsh1	0.1	48
480	02_rsh1	0.08	38.4
480	02_rsh1	0.1	48
480	02_rsh1	0.09	43.2
480	02_rsh1	0.06	28.8
480	02_rsh1	0.01	4.8
480	02_rsh1	0.15	72
480	02_rsh1	0.07	33.6
480	02_rsh1	-0.03	-14.4
480	02_rsh1	0.06	28.8
480	02_rsh1	-0.01	-4.8
480	02_rsh1	0.07	33.6
480	02_rsh1	0.3	144
480	02_rsh1	0.09	43.2
480	02_rsh1	0.04	19.2
480	02_rsh1	0.02	9.6
480	02_rsh1	0.09	43.2
480	02_rsh1	0.04	19.2
480	02_rsh1	0.08	38.4
480	02_rsh1	0.03	14.4
480	02_rsh1	0.05	24
480	02_rsh1	0.04	19.2
480	02_rsh1	0.03	14.4
480	02_rsh1	0.03	14.4
480	02_rsh1	0.07	33.6
480	02_rsh1	0.02	9.6
480	02_rsh1	0.04	19.2
480	02_rsh1	0	0
480	02_rsh1	0.06	28.8
480	02_rsh1	-0.01	-4.8
480	02_rsh1	0.04	19.2
480	02_rsh1	0.03	14.4
480	02_rsh1	0.03	14.4
480	02_rsh1	0.01	4.8
480	02_rsh1	0.1	48
480	02_rsh1	0.07	33.6
480	02_rsh1	0.05	24
480	02_rsh1	0.07	33.6
480	02_rsh1	0.07	33.6
480	02_rsh1	0.07	33.6
480	02_rsh1	0.05	24
480	02_rsh1	0.04	19.2
480	02_rsh1	0.06	28.8
480	02_rsh1	0.08	38.4
480	02_rsh1	0.06	28.8
480	02_rsh1	0.03	14.4
480	02_rsh1	0.07	33.6
480	02_rsh1	0.01	4.8
480	02_rsh1	-0.14	-67.2
480	02_rsh1	0.06	28.8
480	02_rsh1	0.01	4.8
480	02_rsh1	0.1	48
480	02_rsh1	0.05	24
480	02_rsh1	0.02	9.6
480	02_rsh1	-0.01	-4.8
480	02_rsh1	0.08	38.4
480	02_rsh1	0.01	4.8
480	02_rsh1	0.01	4.8
480	02_rsh1	0	0
480	02_rsh1	0	0
480	02_rsh1	0.05	24
480	02_rsh1	0.08	38.4
480	02_rsh1	0.1	48
480	02_rsh1	0.03	14.4
480	02_rsh1	0.04	19.2
480	02_rsh1	-0.04	-19.2
480	02_rsh1	0.06	28.8
480	02_rsh1	0	0
480	02_rsh1	0.04	19.2
480	02_rsh1	0.05	24
480	02_rsh1	0.01	4.8
480	02_rsh1	0.03	14.4
480	02_rsh1	-0.03	-14.4
665	02_rsh1	0.08	53.2
665	02_rsh1	0.06	39.9
665	02_rsh1	0.08	53.2
665	02_rsh1	0.08	53.2
665	02_rsh1	0.07	46.55
665	02_rsh1	0.07	46.55
665	02_rsh1	0.07	46.55
665	02_rsh1	0.03	19.95
665	02_rsh1	0.01	6.65
665	02_rsh1	0.1	66.5
665	02_rsh1	0.05	33.25
665	02_rsh1	-0.02	-13.3
665	02_rsh1	0.08	53.2
665	02_rsh1	0.02	13.3
665	02_rsh1	0.09	59.85
665	02_rsh1	0.17	113.05
665	02_rsh1	0.09	59.85
665	02_rsh1	0.03	19.95
665	02_rsh1	0.02	13.3
665	02_rsh1	0.07	46.55
665	02_rsh1	0.02	13.3
665	02_rsh1	0.05	33.25
665	02_rsh1	0	0
665	02_rsh1	0.08	53.2
665	02_rsh1	0.01	6.65
665	02_rsh1	0.03	19.95
665	02_rsh1	0.01	6.65
665	02_rsh1	0.06	39.9
665	02_rsh1	-0.01	-6.65
665	02_rsh1	0.02	13.3
665	02_rsh1	0	0
665	02_rsh1	0.02	13.3
665	02_rsh1	0.01	6.65
665	02_rsh1	0.04	26.6
665	02_rsh1	0	0
665	02_rsh1	0.04	26.6
665	02_rsh1	-0.03	-19.95
665	02_rsh1	0.07	46.55
665	02_rsh1	0.07	46.55
665	02_rsh1	0.03	19.95
665	02_rsh1	0.05	33.25
665	02_rsh1	0.04	26.6
665	02_rsh1	0.05	33.25
665	02_rsh1	0.04	26.6
665	02_rsh1	-0.01	-6.65
665	02_rsh1	0.04	26.6
665	02_rsh1	0.05	33.25
665	02_rsh1	0.03	19.95
665	02_rsh1	0	0
665	02_rsh1	0.06	39.9
665	02_rsh1	-0.01	-6.65
665	02_rsh1	-0.1	-66.5
665	02_rsh1	0	0
665	02_rsh1	0.02	13.3
665	02_rsh1	0.02	13.3
665	02_rsh1	0.05	33.25
665	02_rsh1	0.01	6.65
665	02_rsh1	0.01	6.65
665	02_rsh1	0.04	26.6
665	02_rsh1	-0.01	-6.65
665	02_rsh1	-0.01	-6.65
665	02_rsh1	0.03	19.95
665	02_rsh1	-0.01	-6.65
665	02_rsh1	0.06	39.9
665	02_rsh1	0.07	46.55
665	02_rsh1	0.05	33.25
665	02_rsh1	0.02	13.3
665	02_rsh1	0.01	6.65
665	02_rsh1	-0.06	-39.9
665	02_rsh1	0.02	13.3
665	02_rsh1	-0.05	-33.25
665	02_rsh1	0.03	19.95
665	02_rsh1	0.03	19.95
665	02_rsh1	0.09	59.85
665	02_rsh1	0.01	6.65
665	02_rsh1	0.04	26.6
866	02_rsh1	0.04	34.64
866	02_rsh1	0.05	43.3
866	02_rsh1	0.06	51.96
866	02_rsh1	0.05	43.3
866	02_rsh1	0.07	60.62
866	02_rsh1	0.05	43.3
866	02_rsh1	0.06	51.96
866	02_rsh1	0.02	17.32
866	02_rsh1	0	0
866	02_rsh1	0.07	60.62
866	02_rsh1	0.03	25.98
866	02_rsh1	-0.04	-34.64
866	02_rsh1	0.03	25.98
866	02_rsh1	-0.02	-17.32
866	02_rsh1	0.04	34.64
866	02_rsh1	0.08	69.28
866	02_rsh1	0.06	51.96
866	02_rsh1	0.04	34.64
866	02_rsh1	0.03	25.98
866	02_rsh1	0.08	69.28
866	02_rsh1	0.02	17.32
866	02_rsh1	0.08	69.28
866	02_rsh1	0.01	8.66
866	02_rsh1	0.02	17.32
866	02_rsh1	0.05	43.3
866	02_rsh1	0.02	17.32
866	02_rsh1	0.03	25.98
866	02_rsh1	0.04	34.64
866	02_rsh1	-0.02	-17.32
866	02_rsh1	0.01	8.66
866	02_rsh1	0.01	8.66
866	02_rsh1	0.03	25.98
866	02_rsh1	-0.02	-17.32
866	02_rsh1	0.04	34.64
866	02_rsh1	0	0
866	02_rsh1	0.01	8.66
866	02_rsh1	0	0
866	02_rsh1	0.06	51.96
866	02_rsh1	0.06	51.96
866	02_rsh1	0.01	8.66
866	02_rsh1	0.04	34.64
866	02_rsh1	0.04	34.64
866	02_rsh1	0.03	25.98
866	02_rsh1	0.04	34.64
866	02_rsh1	0.04	34.64
866	02_rsh1	0.03	25.98
866	02_rsh1	0.05	43.3
866	02_rsh1	0.03	25.98
866	02_rsh1	0.02	17.32
866	02_rsh1	0.03	25.98
866	02_rsh1	0.03	25.98
866	02_rsh1	0.12	103.92
866	02_rsh1	0	0
866	02_rsh1	-0.01	-8.66
866	02_rsh1	0.03	25.98
866	02_rsh1	0.01	8.66
866	02_rsh1	0.02	17.32
866	02_rsh1	0	0
866	02_rsh1	0.03	25.98
866	02_rsh1	-0.01	-8.66
866	02_rsh1	0.02	17.32
866	02_rsh1	0.03	25.98
866	02_rsh1	-0.02	-17.32
866	02_rsh1	0.04	34.64
866	02_rsh1	0.06	51.96
866	02_rsh1	0.04	34.64
866	02_rsh1	0	0
866	02_rsh1	0.01	8.66
866	02_rsh1	-0.05	-43.3
866	02_rsh1	0.03	25.98
866	02_rsh1	-0.01	-8.66
866	02_rsh1	0.03	25.98
866	02_rsh1	0.03	25.98
866	02_rsh1	0.08	69.28
866	02_rsh1	0.06	51.96
866	02_rsh1	0.04	34.64
1098	02_rsh1	0.06	65.88
1098	02_rsh1	0.04	43.92
1098	02_rsh1	0.05	54.9
1098	02_rsh1	0.04	43.92
1098	02_rsh1	0.06	65.88
1098	02_rsh1	0.04	43.92
1098	02_rsh1	0.03	32.94
1098	02_rsh1	0.01	10.98
1098	02_rsh1	0.02	21.96
1098	02_rsh1	0.06	65.88
1098	02_rsh1	0.06	65.88
1098	02_rsh1	-0.03	-32.94
1098	02_rsh1	0.04	43.92
1098	02_rsh1	0.01	10.98
1098	02_rsh1	0.04	43.92
1098	02_rsh1	0.16	175.68
1098	02_rsh1	0.06	65.88
1098	02_rsh1	0	0
1098	02_rsh1	0.02	21.96
1098	02_rsh1	0.05	54.9
1098	02_rsh1	0	0
1098	02_rsh1	0.05	54.9
1098	02_rsh1	0.01	10.98
1098	02_rsh1	0.03	32.94
1098	02_rsh1	0.04	43.92
1098	02_rsh1	0.04	43.92
1098	02_rsh1	0	0
1098	02_rsh1	0.04	43.92
1098	02_rsh1	0.03	32.94
1098	02_rsh1	0.03	32.94
1098	02_rsh1	0.02	21.96
1098	02_rsh1	0.03	32.94
1098	02_rsh1	0.03	32.94
1098	02_rsh1	0.03	32.94
1098	02_rsh1	0.03	32.94
1098	02_rsh1	0.02	21.96
1098	02_rsh1	0.03	32.94
1098	02_rsh1	0.07	76.86
1098	02_rsh1	0.02	21.96
1098	02_rsh1	0.02	21.96
1098	02_rsh1	0.03	32.94
1098	02_rsh1	0.05	54.9
1098	02_rsh1	0.04	43.92
1098	02_rsh1	0	0
1098	02_rsh1	0.01	10.98
1098	02_rsh1	0.03	32.94
1098	02_rsh1	0.02	21.96
1098	02_rsh1	0.02	21.96
1098	02_rsh1	0.02	21.96
1098	02_rsh1	0.03	32.94
1098	02_rsh1	-0.02	-21.96
1098	02_rsh1	-0.01	-10.98
1098	02_rsh1	0.01	10.98
1098	02_rsh1	-0.01	-10.98
1098	02_rsh1	0.04	43.92
1098	02_rsh1	0.03	32.94
1098	02_rsh1	0	0
1098	02_rsh1	0	0
1098	02_rsh1	0.03	32.94
1098	02_rsh1	0	0
1098	02_rsh1	0	0
1098	02_rsh1	0.01	10.98
1098	02_rsh1	0.03	32.94
1098	02_rsh1	0.01	10.98
1098	02_rsh1	0.05	54.9
1098	02_rsh1	0.04	43.92
1098	02_rsh1	-0.02	-21.96
1098	02_rsh1	0	0
1098	02_rsh1	-0.01	-10.98
1098	02_rsh1	0.02	21.96
1098	02_rsh1	0	0
1098	02_rsh1	0	0
1098	02_rsh1	0.02	21.96
1098	02_rsh1	-0.03	-32.94
1098	02_rsh1	0.04	43.92
1098	02_rsh1	0.1	109.8
27	03_QM	0.63	17.01
27	03_QM	0.58	15.66
27	03_QM	0.61	16.47
27	03_QM	0.54	14.58
27	03_QM	0.54	14.58
27	03_QM	0.56	15.12
27	03_QM	0.53	14.31
27	03_QM	0.61	16.47
27	03_QM	0.67	18.09
27	03_QM	0.51	13.77
27	03_QM	0.58	15.66
27	03_QM	0.43	11.61
27	03_QM	0.56	15.12
27	03_QM	0.5	13.5
27	03_QM	0.53	14.31
27	03_QM	0.52	14.04
27	03_QM	0.69	18.63
27	03_QM	0.46	12.42
27	03_QM	0.44	11.88
27	03_QM	0.66	17.82
27	03_QM	0.55	14.85
27	03_QM	0.68	18.36
27	03_QM	0.48	12.96
27	03_QM	0.5	13.5
27	03_QM	0.58	15.66
27	03_QM	0.64	17.28
27	03_QM	0.6	16.2
27	03_QM	0.51	13.77
27	03_QM	0.48	12.96
27	03_QM	0.58	15.66
27	03_QM	0.47	12.69
27	03_QM	0.48	12.96
27	03_QM	0.56	15.12
27	03_QM	0.59	15.93
27	03_QM	0.51	13.77
27	03_QM	0.49	13.23
27	03_QM	0.51	13.77
27	03_QM	0.48	12.96
27	03_QM	0.49	13.23
27	03_QM	0.49	13.23
27	03_QM	0.39	10.53
27	03_QM	0.54	14.58
27	03_QM	0.45	12.15
27	03_QM	0.62	16.74
27	03_QM	0.57	15.39
27	03_QM	0.49	13.23
27	03_QM	0.53	14.31
27	03_QM	0.52	14.04
27	03_QM	0.58	15.66
27	03_QM	0.47	12.69
27	03_QM	0.55	14.85
27	03_QM	0.63	17.01
27	03_QM	0.54	14.58
27	03_QM	0.53	14.31
27	03_QM	0.47	12.69
27	03_QM	0.49	13.23
27	03_QM	0.6	16.2
27	03_QM	0.52	14.04
27	03_QM	0.37	9.99
27	03_QM	0.64	17.28
27	03_QM	0.56	15.12
27	03_QM	0.57	15.39
27	03_QM	0.54	14.58
27	03_QM	0.6	16.2
27	03_QM	0.49	13.23
27	03_QM	0.66	17.82
27	03_QM	0.62	16.74
27	03_QM	0.66	17.82
27	03_QM	0.51	13.77
65	03_QM	0.58	37.7
65	03_QM	0.58	37.7
65	03_QM	0.6	39
65	03_QM	0.51	33.15
65	03_QM	0.48	31.2
65	03_QM	0.5	32.5
65	03_QM	0.49	31.85
65	03_QM	0.59	38.35
65	03_QM	0.63	40.95
65	03_QM	0.5	32.5
65	03_QM	0.54	35.1
65	03_QM	0.41	26.65
65	03_QM	0.52	33.8
65	03_QM	0.44	28.6
65	03_QM	0.5	32.5
65	03_QM	0.49	31.85
65	03_QM	0.65	42.25
65	03_QM	0.43	27.95
65	03_QM	0.43	27.95
65	03_QM	0.6	39
65	03_QM	0.52	33.8
65	03_QM	0.63	40.95
65	03_QM	0.42	27.3
65	03_QM	0.44	28.6
65	03_QM	0.55	35.75
65	03_QM	0.6	39
65	03_QM	0.55	35.75
65	03_QM	0.5	32.5
65	03_QM	0.43	27.95
65	03_QM	0.57	37.05
65	03_QM	0.43	27.95
65	03_QM	0.46	29.9
65	03_QM	0.51	33.15
65	03_QM	0.53	34.45
65	03_QM	0.47	30.55
65	03_QM	0.42	27.3
65	03_QM	0.46	29.9
65	03_QM	0.41	26.65
65	03_QM	0.45	29.25
65	03_QM	0.46	29.9
65	03_QM	0.36	23.4
65	03_QM	0.5	32.5
65	03_QM	0.45	29.25
65	03_QM	0.54	35.1
65	03_QM	0.55	35.75
65	03_QM	0.44	28.6
65	03_QM	0.5	32.5
65	03_QM	0.45	29.25
65	03_QM	0.51	33.15
65	03_QM	0.44	28.6
65	03_QM	0.53	34.45
65	03_QM	0.55	35.75
65	03_QM	0.5	32.5
65	03_QM	0.46	29.9
65	03_QM	0.44	28.6
65	03_QM	0.48	31.2
65	03_QM	0.56	36.4
65	03_QM	0.49	31.85
65	03_QM	0.35	22.75
65	03_QM	0.55	35.75
65	03_QM	0.54	35.1
65	03_QM	0.53	34.45
65	03_QM	0.51	33.15
65	03_QM	0.54	35.1
65	03_QM	0.47	30.55
65	03_QM	0.62	40.3
65	03_QM	0.59	38.35
65	03_QM	0.58	37.7
65	03_QM	0.5	32.5
124	03_QM	0.52	64.48
124	03_QM	0.52	64.48
124	03_QM	0.59	73.16
124	03_QM	0.41	50.84
124	03_QM	0.36	44.64
124	03_QM	0.39	48.36
124	03_QM	0.38	47.12
124	03_QM	0.51	63.24
124	03_QM	0.54	66.96
124	03_QM	0.43	53.32
124	03_QM	0.44	54.56
124	03_QM	0.35	43.4
124	03_QM	0.43	53.32
124	03_QM	0.37	45.88
124	03_QM	0.41	50.84
124	03_QM	0.45	55.8
124	03_QM	0.54	66.96
124	03_QM	0.37	45.88
124	03_QM	0.33	40.92
124	03_QM	0.45	55.8
124	03_QM	0.44	54.56
124	03_QM	0.49	60.76
124	03_QM	0.36	44.64
124	03_QM	0.35	43.4
124	03_QM	0.45	55.8
124	03_QM	0.56	69.44
124	03_QM	0.48	59.52
124	03_QM	0.46	57.04
124	03_QM	0.37	45.88
124	03_QM	0.52	64.48
124	03_QM	0.36	44.64
124	03_QM	0.37	45.88
124	03_QM	0.39	48.36
124	03_QM	0.38	47.12
124	03_QM	0.37	45.88
124	03_QM	0.29	35.96
124	03_QM	0.33	40.92
124	03_QM	0.34	42.16
124	03_QM	0.42	52.08
124	03_QM	0.39	48.36
124	03_QM	0.28	34.72
124	03_QM	0.38	47.12
124	03_QM	0.38	47.12
124	03_QM	0.45	55.8
124	03_QM	0.45	55.8
124	03_QM	0.35	43.4
124	03_QM	0.39	48.36
124	03_QM	0.37	45.88
124	03_QM	0.36	44.64
124	03_QM	0.34	42.16
124	03_QM	0.49	60.76
124	03_QM	0.4	49.6
124	03_QM	0.41	50.84
124	03_QM	0.34	42.16
124	03_QM	0.37	45.88
124	03_QM	0.38	47.12
124	03_QM	0.45	55.8
124	03_QM	0.4	49.6
124	03_QM	0.32	39.68
124	03_QM	0.4	49.6
124	03_QM	0.46	57.04
124	03_QM	0.45	55.8
124	03_QM	0.42	52.08
124	03_QM	0.4	49.6
124	03_QM	0.4	49.6
124	03_QM	0.52	64.48
124	03_QM	0.48	59.52
124	03_QM	0.42	52.08
124	03_QM	0.38	47.12
217	03_QM	0.38	82.46
217	03_QM	0.4	86.8
217	03_QM	0.53	115.01
217	03_QM	0.28	60.76
217	03_QM	0.24	52.08
217	03_QM	0.28	60.76
217	03_QM	0.27	58.59
217	03_QM	0.4	86.8
217	03_QM	0.36	78.12
217	03_QM	0.3	65.1
217	03_QM	0.31	67.27
217	03_QM	0.25	54.25
217	03_QM	0.36	78.12
217	03_QM	0.27	58.59
217	03_QM	0.27	58.59
217	03_QM	0.32	69.44
217	03_QM	0.37	80.29
217	03_QM	0.25	54.25
217	03_QM	0.22	47.74
217	03_QM	0.28	60.76
217	03_QM	0.33	71.61
217	03_QM	0.33	71.61
217	03_QM	0.27	58.59
217	03_QM	0.26	56.42
217	03_QM	0.37	80.29
217	03_QM	0.44	95.48
217	03_QM	0.38	82.46
217	03_QM	0.36	78.12
217	03_QM	0.27	58.59
217	03_QM	0.41	88.97
217	03_QM	0.27	58.59
217	03_QM	0.24	52.08
217	03_QM	0.27	58.59
217	03_QM	0.26	56.42
217	03_QM	0.26	56.42
217	03_QM	0.19	41.23
217	03_QM	0.21	45.57
217	03_QM	0.25	54.25
217	03_QM	0.31	67.27
217	03_QM	0.3	65.1
217	03_QM	0.21	45.57
217	03_QM	0.31	67.27
217	03_QM	0.28	60.76
217	03_QM	0.3	65.1
217	03_QM	0.3	65.1
217	03_QM	0.27	58.59
217	03_QM	0.31	67.27
217	03_QM	0.27	58.59
217	03_QM	0.23	49.91
217	03_QM	0.22	47.74
217	03_QM	0.41	88.97
217	03_QM	0.25	54.25
217	03_QM	0.29	62.93
217	03_QM	0.22	47.74
217	03_QM	0.25	54.25
217	03_QM	0.25	54.25
217	03_QM	0.31	67.27
217	03_QM	0.31	67.27
217	03_QM	0.22	47.74
217	03_QM	0.24	52.08
217	03_QM	0.35	75.95
217	03_QM	0.31	67.27
217	03_QM	0.32	69.44
217	03_QM	0.27	58.59
217	03_QM	0.27	58.59
217	03_QM	0.41	88.97
217	03_QM	0.35	75.95
217	03_QM	0.3	65.1
217	03_QM	0.35	75.95
325	03_QM	0.29	94.25
325	03_QM	0.27	87.75
325	03_QM	0.41	133.25
325	03_QM	0.19	61.75
325	03_QM	0.14	45.5
325	03_QM	0.2	65
325	03_QM	0.19	61.75
325	03_QM	0.29	94.25
325	03_QM	0.27	87.75
325	03_QM	0.21	68.25
325	03_QM	0.22	71.5
325	03_QM	0.18	58.5
325	03_QM	0.28	91
325	03_QM	0.21	68.25
325	03_QM	0.21	68.25
325	03_QM	0.24	78
325	03_QM	0.26	84.5
325	03_QM	0.18	58.5
325	03_QM	0.17	55.25
325	03_QM	0.22	71.5
325	03_QM	0.23	74.75
325	03_QM	0.24	78
325	03_QM	0.23	74.75
325	03_QM	0.18	58.5
325	03_QM	0.29	94.25
325	03_QM	0.34	110.5
325	03_QM	0.27	87.75
325	03_QM	0.29	94.25
325	03_QM	0.21	68.25
325	03_QM	0.37	120.25
325	03_QM	0.19	61.75
325	03_QM	0.18	58.5
325	03_QM	0.19	61.75
325	03_QM	0.22	71.5
325	03_QM	0.17	55.25
325	03_QM	0.13	42.25
325	03_QM	0.15	48.75
325	03_QM	0.23	74.75
325	03_QM	0.24	78
325	03_QM	0.21	68.25
325	03_QM	0.15	48.75
325	03_QM	0.22	71.5
325	03_QM	0.19	61.75
325	03_QM	0.21	68.25
325	03_QM	0.25	81.25
325	03_QM	0.22	71.5
325	03_QM	0.22	71.5
325	03_QM	0.19	61.75
325	03_QM	0.18	58.5
325	03_QM	0.17	55.25
325	03_QM	0.32	104
325	03_QM	0.19	61.75
325	03_QM	0.21	68.25
325	03_QM	0.16	52
325	03_QM	0.18	58.5
325	03_QM	0.19	61.75
325	03_QM	0.24	78
325	03_QM	0.22	71.5
325	03_QM	0.16	52
325	03_QM	0.19	61.75
325	03_QM	0.25	81.25
325	03_QM	0.22	71.5
325	03_QM	0.25	81.25
325	03_QM	0.18	58.5
325	03_QM	0.19	61.75
325	03_QM	0.32	104
325	03_QM	0.25	81.25
325	03_QM	0.21	68.25
325	03_QM	0.18	58.5
480	03_QM	0.22	105.6
480	03_QM	0.2	96
480	03_QM	0.28	134.4
480	03_QM	0.15	72
480	03_QM	0.12	57.6
480	03_QM	0.16	76.8
480	03_QM	0.13	62.4
480	03_QM	0.2	96
480	03_QM	0.19	91.2
480	03_QM	0.15	72
480	03_QM	0.16	76.8
480	03_QM	0.13	62.4
480	03_QM	0.2	96
480	03_QM	0.14	67.2
480	03_QM	0.13	62.4
480	03_QM	0.16	76.8
480	03_QM	0.18	86.4
480	03_QM	0.13	62.4
480	03_QM	0.13	62.4
480	03_QM	0.14	67.2
480	03_QM	0.16	76.8
480	03_QM	0.17	81.6
480	03_QM	0.15	72
480	03_QM	0.14	67.2
480	03_QM	0.22	105.6
480	03_QM	0.29	139.2
480	03_QM	0.2	96
480	03_QM	0.21	100.8
480	03_QM	0.13	62.4
480	03_QM	0.25	120
480	03_QM	0.15	72
480	03_QM	0.1	48
480	03_QM	0.13	62.4
480	03_QM	0.16	76.8
480	03_QM	0.14	67.2
480	03_QM	0.09	43.2
480	03_QM	0.11	52.8
480	03_QM	0.16	76.8
480	03_QM	0.22	105.6
480	03_QM	0.15	72
480	03_QM	0.11	52.8
480	03_QM	0.19	91.2
480	03_QM	0.15	72
480	03_QM	0.15	72
480	03_QM	0.19	91.2
480	03_QM	0.15	72
480	03_QM	0.16	76.8
480	03_QM	0.16	76.8
480	03_QM	0.13	62.4
480	03_QM	0.13	62.4
480	03_QM	0.22	105.6
480	03_QM	0.15	72
480	03_QM	0.14	67.2
480	03_QM	0.12	57.6
480	03_QM	0.13	62.4
480	03_QM	0.12	57.6
480	03_QM	0.17	81.6
480	03_QM	0.16	76.8
480	03_QM	0.11	52.8
480	03_QM	0.12	57.6
480	03_QM	0.2	96
480	03_QM	0.16	76.8
480	03_QM	0.18	86.4
480	03_QM	0.14	67.2
480	03_QM	0.14	67.2
480	03_QM	0.23	110.4
480	03_QM	0.19	91.2
480	03_QM	0.18	86.4
480	03_QM	0.12	57.6
665	03_QM	0.19	126.35
665	03_QM	0.14	93.1
665	03_QM	0.19	126.35
665	03_QM	0.12	79.8
665	03_QM	0.09	59.85
665	03_QM	0.12	79.8
665	03_QM	0.1	66.5
665	03_QM	0.13	86.45
665	03_QM	0.15	99.75
665	03_QM	0.11	73.15
665	03_QM	0.12	79.8
665	03_QM	0.1	66.5
665	03_QM	0.14	93.1
665	03_QM	0.1	66.5
665	03_QM	0.1	66.5
665	03_QM	0.1	66.5
665	03_QM	0.14	93.1
665	03_QM	0.09	59.85
665	03_QM	0.1	66.5
665	03_QM	0.11	73.15
665	03_QM	0.11	73.15
665	03_QM	0.11	73.15
665	03_QM	0.12	79.8
665	03_QM	0.08	53.2
665	03_QM	0.15	99.75
665	03_QM	0.24	159.6
665	03_QM	0.12	79.8
665	03_QM	0.13	86.45
665	03_QM	0.11	73.15
665	03_QM	0.13	86.45
665	03_QM	0.11	73.15
665	03_QM	0.09	59.85
665	03_QM	0.11	73.15
665	03_QM	0.08	53.2
665	03_QM	0.1	66.5
665	03_QM	0.08	53.2
665	03_QM	0.07	46.55
665	03_QM	0.11	73.15
665	03_QM	0.15	99.75
665	03_QM	0.12	79.8
665	03_QM	0.09	59.85
665	03_QM	0.11	73.15
665	03_QM	0.1	66.5
665	03_QM	0.09	59.85
665	03_QM	0.15	99.75
665	03_QM	0.12	79.8
665	03_QM	0.12	79.8
665	03_QM	0.11	73.15
665	03_QM	0.08	53.2
665	03_QM	0.09	59.85
665	03_QM	0.14	93.1
665	03_QM	0.1	66.5
665	03_QM	0.1	66.5
665	03_QM	0.08	53.2
665	03_QM	0.11	73.15
665	03_QM	0.09	59.85
665	03_QM	0.12	79.8
665	03_QM	0.09	59.85
665	03_QM	0.06	39.9
665	03_QM	0.09	59.85
665	03_QM	0.15	99.75
665	03_QM	0.1	66.5
665	03_QM	0.13	86.45
665	03_QM	0.09	59.85
665	03_QM	0.1	66.5
665	03_QM	0.13	86.45
665	03_QM	0.1	66.5
665	03_QM	0.09	59.85
665	03_QM	0.12	79.8
866	03_QM	0.14	121.24
866	03_QM	0.11	95.26
866	03_QM	0.14	121.24
866	03_QM	0.09	77.94
866	03_QM	0.06	51.96
866	03_QM	0.09	77.94
866	03_QM	0.08	69.28
866	03_QM	0.1	86.6
866	03_QM	0.07	60.62
866	03_QM	0.08	69.28
866	03_QM	0.08	69.28
866	03_QM	0.08	69.28
866	03_QM	0.13	112.58
866	03_QM	0.09	77.94
866	03_QM	0.09	77.94
866	03_QM	0.1	86.6
866	03_QM	0.09	77.94
866	03_QM	0.08	69.28
866	03_QM	0.09	77.94
866	03_QM	0.08	69.28
866	03_QM	0.1	86.6
866	03_QM	0.1	86.6
866	03_QM	0.11	95.26
866	03_QM	0.07	60.62
866	03_QM	0.1	86.6
866	03_QM	0.13	112.58
866	03_QM	0.09	77.94
866	03_QM	0.09	77.94
866	03_QM	0.08	69.28
866	03_QM	0.18	155.88
866	03_QM	0.09	77.94
866	03_QM	0.07	60.62
866	03_QM	0.08	69.28
866	03_QM	0.11	95.26
866	03_QM	0.08	69.28
866	03_QM	0.06	51.96
866	03_QM	0.08	69.28
866	03_QM	0.09	77.94
866	03_QM	0.12	103.92
866	03_QM	0.07	60.62
866	03_QM	0.05	43.3
866	03_QM	0.08	69.28
866	03_QM	0.09	77.94
866	03_QM	0.07	60.62
866	03_QM	0.14	121.24
866	03_QM	0.09	77.94
866	03_QM	0.09	77.94
866	03_QM	0.07	60.62
866	03_QM	0.08	69.28
866	03_QM	0.09	77.94
866	03_QM	0.11	95.26
866	03_QM	0.07	60.62
866	03_QM	0.07	60.62
866	03_QM	0.07	60.62
866	03_QM	0.07	60.62
866	03_QM	0.09	77.94
866	03_QM	0.1	86.6
866	03_QM	0.07	60.62
866	03_QM	0.08	69.28
866	03_QM	0.1	86.6
866	03_QM	0.11	95.26
866	03_QM	0.11	95.26
866	03_QM	0.11	95.26
866	03_QM	0.06	51.96
866	03_QM	0.07	60.62
866	03_QM	0.13	112.58
866	03_QM	0.09	77.94
866	03_QM	0.09	77.94
866	03_QM	0.07	60.62
1098	03_QM	0.14	153.72
1098	03_QM	0.08	87.84
1098	03_QM	0.09	98.82
1098	03_QM	0.07	76.86
1098	03_QM	0.04	43.92
1098	03_QM	0.03	32.94
1098	03_QM	0.08	87.84
1098	03_QM	0.09	98.82
1098	03_QM	0.08	87.84
1098	03_QM	0.08	87.84
1098	03_QM	0.06	65.88
1098	03_QM	0.05	54.9
1098	03_QM	0.09	98.82
1098	03_QM	0.1	109.8
1098	03_QM	0.06	65.88
1098	03_QM	0.06	65.88
1098	03_QM	0.11	120.78
1098	03_QM	0.03	32.94
1098	03_QM	0.09	98.82
1098	03_QM	0.09	98.82
1098	03_QM	0.07	76.86
1098	03_QM	0.1	109.8
1098	03_QM	0.07	76.86
1098	03_QM	0.07	76.86
1098	03_QM	0.1	109.8
1098	03_QM	0.13	142.74
1098	03_QM	0.07	76.86
1098	03_QM	0.07	76.86
1098	03_QM	0.08	87.84
1098	03_QM	0.04	43.92
1098	03_QM	0.05	54.9
1098	03_QM	0.06	65.88
1098	03_QM	0.08	87.84
1098	03_QM	0.05	54.9
1098	03_QM	0.07	76.86
1098	03_QM	0.05	54.9
1098	03_QM	0.04	43.92
1098	03_QM	0.07	76.86
1098	03_QM	0.1	109.8
1098	03_QM	0.05	54.9
1098	03_QM	0.03	32.94
1098	03_QM	0.1	109.8
1098	03_QM	0.08	87.84
1098	03_QM	0.11	120.78
1098	03_QM	0.11	120.78
1098	03_QM	0.09	98.82
1098	03_QM	0.06	65.88
1098	03_QM	0.07	76.86
1098	03_QM	0.06	65.88
1098	03_QM	0.08	87.84
1098	03_QM	0.09	98.82
1098	03_QM	0.07	76.86
1098	03_QM	0.07	76.86
1098	03_QM	0.05	54.9
1098	03_QM	0.08	87.84
1098	03_QM	0.06	65.88
1098	03_QM	0.1	109.8
1098	03_QM	0.09	98.82
1098	03_QM	0.06	65.88
1098	03_QM	0.05	54.9
1098	03_QM	0.11	120.78
1098	03_QM	0.09	98.82
1098	03_QM	0.07	76.86
1098	03_QM	0.03	32.94
1098	03_QM	0.05	54.9
1098	03_QM	0.08	87.84
1098	03_QM	0.09	98.82
1098	03_QM	0.1	109.8
1098	03_QM	0.17	186.66
