# Supplementary material for: A guanosine tetraphosphate (ppGpp) mediated brake on photosynthesis is required for acclimation to nitrogen limitation in Arabidopsis
Source: eLife journal article supplement (doi:10.7554/elife.75041), 2022-02-14
Supplement: fig2-data1 [file Fig_2D_data.xlsx]

## Sheet: data
Line	Light	Day	F0	Fm	Fv/Fm
01_qrt	10	8	118.72	681.4	0.82577
01_qrt	10	8	130.16	740.89	0.824319
01_qrt	10	8	256.64	1291.37	0.801265
01_qrt	10	8	294.04	1363.98	0.784425
01_qrt	10	8	308.65	1462.59	0.78897
01_qrt	10	8	167	872.92	0.808688
01_qrt	10	8	200.4	1064.29	0.811705
01_qrt	10	8	172.29	949.53	0.818542
01_qrt	10	8	215.62	1102.48	0.804423
01_qrt	10	8	141.03	800.09	0.823732
01_qrt	10	8	197.11	1114.88	0.823201
01_qrt	10	8	211.79	1077.48	0.80344
01_qrt	10	8	174.13	978.77	0.822093
01_qrt	10	8	220.68	1182.67	0.813405
01_qrt	10	8	261.6	1313.3	0.800807
01_qrt	10	8	301.65	1370.51	0.779899
01_qrt	10	8	273.41	1326.67	0.793913
01_qrt	10	8	278.55	1350.33	0.793717
01_qrt	10	8	267.27	1098.41	0.756676
01_qrt	10	8	221.92	1053.06	0.789262
01_qrt	10	8	140.45	809.45	0.826499
01_qrt	10	8	188.83	1014.62	0.813891
01_qrt	10	8	307.24	1463.7	0.790094
01_qrt	10	8	278.76	1307.2	0.786743
01_qrt	10	8	223.81	1177.5	0.809928
01_qrt	10	8	167.83	913	0.816177
01_qrt	10	8	245.14	1307.1	0.812455
01_qrt	10	8	233.74	1075.07	0.782582
01_qrt	10	8	328.66	1386.68	0.762988
01_qrt	10	8	293.04	1350.85	0.78307
01_qrt	10	8	181.58	962.42	0.81134
01_qrt	10	8	309.14	1358.73	0.772479
01_qrt	10	8	287.36	1290.54	0.777326
01_qrt	10	8	219.6	1135.39	0.806586
01_qrt	10	8	191.82	1087.41	0.823599
01_qrt	10	8	277.81	1337.84	0.792344
01_qrt	10	8	263.83	1192.2	0.778703
01_qrt	10	8	227.93	1194.37	0.809155
01_qrt	10	8	229.47	1052.75	0.782028
01_qrt	10	8	224.53	1203	0.813358
01_qrt	10	8	167.74	896.94	0.812986
01_qrt	10	8	233.17	1249.31	0.813353
01_qrt	10	8	305.52	1503.33	0.796771
01_qrt	10	8	223.22	1113.3	0.799497
01_qrt	10	8	351.77	1284.24	0.726087
01_qrt	10	8	227.75	1135.5	0.799428
01_qrt	10	8	270.97	1202.76	0.77471
01_qrt	10	8	173.56	911.34	0.809555
01_qrt	10	8	188.67	1016.35	0.814365
01_qrt	10	8	156.08	872.21	0.821052
01_qrt	10	8	182.24	975.35	0.813154
01_qrt	10	8	167.39	884.5	0.810752
01_qrt	10	8	209.97	1111.98	0.811175
01_qrt	10	8	335.21	1417.45	0.763512
01_qrt	10	8	172.84	931.98	0.814535
01_qrt	10	8	192.32	1021.91	0.811803
01_qrt	10	8	301.48	1291.57	0.766586
01_qrt	10	8	348.63	1431.97	0.756545
01_qrt	10	8	272.64	1286.66	0.788103
01_qrt	10	8	330.58	1489.2	0.778015
01_qrt	10	8	317.2	1480.23	0.785716
01_qrt	10	8	323.81	1432.8	0.773995
01_qrt	10	8	362.45	1177.23	0.692116
01_qrt	10	10	119.24	633.15	0.811672
01_qrt	10	10	91.81	481.24	0.809222
01_qrt	10	10	110.47	555.57	0.801159
01_qrt	10	10	384.86	669.37	0.425041
01_qrt	10	10	123.85	617.57	0.799456
01_qrt	10	10	94.7	518.68	0.817402
01_qrt	10	10	268.06	1322.31	0.797279
01_qrt	10	10	135	671.3	0.798898
01_qrt	10	10	235.88	976.85	0.75852
01_qrt	10	10	185.14	869.96	0.787186
01_qrt	10	10	207.5	1043.1	0.801074
01_qrt	10	10	162.32	797.29	0.79641
01_qrt	10	10	182.79	846.87	0.784158
01_qrt	10	10	146.12	725.58	0.798602
01_qrt	10	10	221.93	985.73	0.774857
01_qrt	10	10	237.3	1116.37	0.787436
01_qrt	10	10	165.61	834.02	0.801444
01_qrt	10	10	259.37	1114.36	0.767248
01_qrt	10	10	150.45	741.17	0.797024
01_qrt	10	10	215.8	1036.94	0.791888
01_qrt	10	10	359.19	1461.05	0.754156
01_qrt	10	10	308.86	1244.93	0.751906
01_qrt	10	10	275.41	1235.25	0.777041
01_qrt	10	10	298.1	1368.12	0.78211
01_qrt	10	10	216.05	1053.35	0.794892
01_qrt	10	10	268.73	1193.24	0.77479
01_qrt	10	10	174.3	795.21	0.780825
01_qrt	10	10	238.82	1006.04	0.762604
01_qrt	10	10	149.14	737.24	0.797691
01_qrt	10	10	198.83	926.54	0.785406
01_qrt	10	10	240.62	1201.11	0.79966
01_qrt	10	10	227.3	1099.33	0.793238
01_qrt	10	10	301	1237.39	0.756746
01_qrt	10	10	196.38	1009.7	0.805507
01_qrt	10	10	195.32	922.67	0.78831
01_qrt	10	10	288.58	1219.76	0.763404
01_qrt	10	10	289.99	1240.53	0.766237
01_qrt	10	10	320.87	1339.87	0.760522
01_qrt	10	10	267.32	1136.17	0.764727
01_qrt	10	10	201.08	942.26	0.786598
01_qrt	10	10	312.64	1306.96	0.760788
01_qrt	10	10	283.9	1264.44	0.775474
01_qrt	10	10	266.43	1207.43	0.779341
01_qrt	10	10	313.6	1329.39	0.764102
01_qrt	10	10	289.45	1320.84	0.780859
01_qrt	10	10	259.09	1080.69	0.760255
01_qrt	10	10	239.2	1071.02	0.776652
01_qrt	10	10	320.71	1249.6	0.74335
01_qrt	10	10	280.86	1300.8	0.784087
01_qrt	10	10	227.07	1063.07	0.786402
01_qrt	10	10	279.22	1294.19	0.784251
01_qrt	10	10	285.38	1118.89	0.744944
01_qrt	10	10	271.22	1161.59	0.76651
01_qrt	10	10	260.73	1054.73	0.75279
01_qrt	10	10	202.66	912.3	0.777858
01_qrt	10	10	195.94	891.63	0.780256
01_qrt	10	10	267.35	1170.52	0.771606
01_qrt	10	10	337.79	1360.88	0.751778
01_qrt	10	10	355.81	1295.18	0.725274
01_qrt	10	10	207.31	1003.18	0.793357
01_qrt	10	10	182.52	880.16	0.792629
01_qrt	10	10	278.67	1174.04	0.76264
01_qrt	10	10	200.61	921.02	0.782187
01_qrt	10	10	359.95	1372.44	0.73773
01_qrt	10	10	195.75	913.23	0.785651
01_qrt	10	10	270.78	1176.35	0.769813
01_qrt	10	10	292.61	1305.59	0.775879
01_qrt	10	10	208.74	1004.97	0.792292
01_qrt	10	10	345.98	1415.85	0.755638
01_qrt	10	10	277.63	1255.11	0.7788
01_qrt	10	10	391.97	1238.9	0.683606
01_qrt	10	10	204.19	980.58	0.791766
01_qrt	10	10	304.57	1299.82	0.765683
01_qrt	10	10	320.99	1374.18	0.766406
01_qrt	10	10	362.43	1296.33	0.720418
01_qrt	10	10	302.02	1207.03	0.749774
01_qrt	10	10	218.03	1042.89	0.790937
01_qrt	10	10	342.32	1475.3	0.767959
01_qrt	10	12	94.28	314.57	0.700257
01_qrt	10	12	90.08	389.43	0.768713
01_qrt	10	12	72.38	346.48	0.791099
01_qrt	10	12	113.3	291.53	0.611361
01_qrt	10	12	90.91	450.25	0.79809
01_qrt	10	12	95.81	461.43	0.792385
01_qrt	10	12	104.83	385.62	0.728152
01_qrt	10	12	399.85	645.93	0.380986
01_qrt	10	12	146.3	516.18	0.716572
01_qrt	10	12	245.26	695.38	0.647301
01_qrt	10	12	142.87	411.33	0.652663
01_qrt	10	12	111.35	505.68	0.779801
01_qrt	10	12	163.17	506.88	0.678109
01_qrt	10	12	146.83	616.67	0.761899
01_qrt	10	12	280.9	761.05	0.630905
01_qrt	10	12	282.83	722.19	0.608372
01_qrt	10	12	174.08	548.53	0.682643
01_qrt	10	12	130.22	595.39	0.781286
01_qrt	10	12	142.88	723.73	0.802578
01_qrt	10	12	234.66	1011.88	0.768095
01_qrt	10	12	244.5	934.08	0.738245
01_qrt	10	12	132.61	665.13	0.80061
01_qrt	10	12	171.92	842.18	0.795851
01_qrt	10	12	183.7	797.14	0.769551
01_qrt	10	12	299.71	1241.34	0.758559
01_qrt	10	12	151.82	686.61	0.778885
01_qrt	10	12	172.06	900.91	0.809015
01_qrt	10	12	218.63	1041.55	0.790092
01_qrt	10	12	202.21	913.62	0.778672
01_qrt	10	12	181.32	914.99	0.801834
01_qrt	10	12	280.05	1218.21	0.770114
01_qrt	10	12	181.91	772.68	0.764573
01_qrt	10	12	303.18	1051.41	0.711654
01_qrt	10	12	263.87	1128.93	0.766265
01_qrt	10	12	212.65	853.08	0.750715
01_qrt	10	12	255.99	1034.49	0.752554
01_qrt	10	12	291.45	1041.01	0.720032
01_qrt	10	12	266.43	937.1	0.715697
01_qrt	10	12	186.38	915.95	0.796517
01_qrt	10	12	250.81	1022.28	0.754656
01_qrt	10	12	243.81	979.77	0.751166
01_qrt	10	12	288.32	1197.69	0.75927
01_qrt	10	12	269.31	1310.99	0.794575
01_qrt	10	12	284.13	1076.28	0.736007
01_qrt	10	12	211.77	895.55	0.76352
01_qrt	10	12	291.08	1158.84	0.748818
01_qrt	10	12	167.11	754.33	0.778466
01_qrt	10	12	236.67	956.14	0.752473
01_qrt	10	12	230.51	1053.88	0.781275
01_qrt	10	12	229.52	871.6	0.736668
01_qrt	10	12	179.02	856.81	0.791062
01_qrt	10	12	228.55	803.55	0.715575
01_qrt	10	12	201.74	724.82	0.721669
01_qrt	10	12	249.75	1115.92	0.776194
01_qrt	10	12	216.83	1059.59	0.795364
01_qrt	10	12	234.54	1056.96	0.778099
01_qrt	10	12	356.9	1188.53	0.699713
01_qrt	10	12	241.85	1065.81	0.773093
01_qrt	10	12	192.25	824.35	0.766786
01_qrt	10	12	259.49	1030.95	0.7483
01_qrt	10	12	263.5	989.68	0.733752
01_qrt	10	12	308.95	1208.97	0.74446
01_qrt	10	12	296.24	1163.03	0.745286
01_qrt	10	12	163.27	696.94	0.765733
01_qrt	10	12	287.85	1154.56	0.750693
01_qrt	10	12	230.75	838.1	0.724675
01_qrt	10	12	230	932.08	0.75324
01_qrt	10	12	254.87	1136.19	0.77568
01_qrt	10	12	297.27	1136.07	0.738344
01_qrt	10	12	287.53	1159.54	0.752022
01_qrt	10	12	281.66	1056	0.733277
01_qrt	10	12	247.49	1175.5	0.78946
01_qrt	10	12	316.87	1284.33	0.753272
01_qrt	10	12	299.45	1243.66	0.759219
01_qrt	10	12	317.52	1185.14	0.732082
01_qrt	10	12	295.42	1322.16	0.776563
01_qrt	10	12	185.92	934.6	0.80107
01_qrt	10	12	195.36	864.03	0.773897
01_qrt	10	12	274.34	1209.7	0.773216
01_qrt	10	15	64.62	257.35	0.748902
01_qrt	10	15	29.85	123.51	0.758319
01_qrt	10	15	38.35	186.01	0.793828
01_qrt	10	15	45.5	223.31	0.796203
01_qrt	10	15	93.85	383.75	0.75544
01_qrt	10	15	27.24	167.19	0.837072
01_qrt	10	15	79.94	178.17	0.551384
01_qrt	10	15	33.41	176.58	0.810794
01_qrt	10	15	26.63	165.59	0.839181
01_qrt	10	15	94.31	193.82	0.513415
01_qrt	10	15	57.39	247.87	0.768467
01_qrt	10	15	36.84	148.94	0.752652
01_qrt	10	15	52.53	174.44	0.698865
01_qrt	10	15	29.55	125.28	0.764128
01_qrt	10	15	111.75	167.78	0.333949
01_qrt	10	15	82.54	219.03	0.623157
01_qrt	10	15	50.63	176.74	0.713534
01_qrt	10	15	31.63	148.77	0.78739
01_qrt	10	15	56.49	202.11	0.720499
01_qrt	10	15	173.23	267.94	0.353475
01_qrt	10	15	54.63	212.03	0.742348
01_qrt	10	15	38.41	173.74	0.778923
01_qrt	10	15	49.17	192.88	0.745075
01_qrt	10	15	78.36	185.89	0.57846
01_qrt	10	15	58.6	168.42	0.65206
01_qrt	10	15	102.36	218.09	0.530652
01_qrt	10	15	49.61	161.36	0.692551
01_qrt	10	15	63.63	168.88	0.623224
01_qrt	10	15	46.23	190.78	0.757679
01_qrt	10	15	40.22	166.95	0.75909
01_qrt	10	15	68.28	302.85	0.774509
01_qrt	10	15	120.62	257.58	0.531718
01_qrt	10	15	30.69	195.07	0.842672
01_qrt	10	15	228.7	327.38	0.301423
01_qrt	10	15	98.41	219.2	0.551095
01_qrt	10	15	49.94	222.34	0.775344
01_qrt	10	15	152.69	255.31	0.401943
01_qrt	10	15	79.53	227.63	0.650617
01_qrt	10	15	45.56	156.81	0.709457
01_qrt	10	15	109.29	364.86	0.70046
01_qrt	10	15	124.31	267.04	0.534489
01_qrt	10	15	308.92	493.46	0.373972
01_qrt	10	15	110.65	210.63	0.474671
01_qrt	10	15	164.16	294.47	0.44249
01_qrt	10	15	232.4	375.31	0.380779
01_qrt	10	15	77	270.8	0.715694
01_qrt	10	15	279.69	402.49	0.305101
01_qrt	10	15	101.64	225.41	0.549088
01_qrt	10	15	68.17	323.59	0.789332
01_qrt	10	15	176.33	585.72	0.698952
01_qrt	10	15	368.96	472.83	0.219677
01_qrt	10	15	184.49	300.59	0.38624
01_qrt	10	15	399.29	506.46	0.211606
01_qrt	10	15	483.44	637.58	0.241758
01_qrt	10	15	149.09	316.68	0.529209
01_qrt	10	15	352.25	468.62	0.248304
01_qrt	10	15	115.45	560.31	0.793953
01_qrt	10	15	118.51	567.75	0.791264
01_qrt	10	15	222.15	865.94	0.74347
01_qrt	10	15	231.37	867.55	0.733295
01_qrt	10	15	158.87	776.31	0.795352
01_qrt	10	15	175.44	822.17	0.786601
01_qrt	10	15	282.69	915.6	0.691252
01_qrt	10	15	168.26	805.79	0.791199
01_qrt	10	15	193.36	891.72	0.783149
01_qrt	10	15	241.07	977.87	0.753474
01_qrt	10	15	300.71	1054.44	0.714815
01_qrt	10	15	194.24	846.03	0.77041
01_qrt	10	15	111.57	529.83	0.789442
01_qrt	10	15	103.56	464.33	0.776969
01_qrt	10	15	113.66	513.08	0.778456
01_qrt	10	15	248.63	931.15	0.732986
01_qrt	10	15	240.42	948.28	0.746467
01_qrt	10	15	274.42	975.25	0.718616
01_qrt	10	15	237.88	692.78	0.65663
01_qrt	10	15	143.03	506.24	0.717466
01_qrt	10	15	150.65	586.67	0.743212
01_qrt	10	15	158.36	674.51	0.765222
01_qrt	10	15	133.13	657.05	0.797382
01_qrt	10	15	168.31	792.82	0.787707
01_qrt	10	15	202.72	811.23	0.750108
01_qrt	10	15	224.28	790.48	0.716274
01_qrt	10	15	111.59	551.78	0.797782
01_qrt	10	15	265.83	876.13	0.696586
01_qrt	10	15	337.88	941.36	0.641072
01_qrt	10	15	235.47	960.49	0.754844
01_qrt	10	15	230.55	797.49	0.710905
01_qrt	10	15	244.74	953.78	0.7434
01_qrt	10	15	226.8	1024.22	0.778563
01_qrt	10	15	141.71	467.53	0.696875
01_qrt	10	15	117.59	514.34	0.771377
01_qrt	10	15	225.48	813.78	0.722923
01_qrt	10	15	237.67	942.84	0.747921
01_qrt	10	15	184.91	880.07	0.789892
01_qrt	10	15	252.51	1053.86	0.760395
01_qrt	10	15	147.45	689.66	0.786213
01_qrt	10	15	250.09	1085.85	0.769683
01_qrt	10	15	178.2	800.12	0.777296
01_qrt	10	15	273.39	939.77	0.709088
01_qrt	10	15	286.73	724.64	0.604314
01_qrt	10	15	161.28	557.96	0.710947
01_qrt	10	15	187.42	880.23	0.78709
01_qrt	10	15	278.73	889.59	0.686665
01_qrt	10	15	254.26	832.71	0.69466
01_qrt	10	15	263.68	884.79	0.701997
01_qrt	10	15	295.45	876.12	0.662775
01_qrt	10	15	330.55	877.7	0.623391
01_qrt	10	15	218.27	869.46	0.748959
01_qrt	10	15	255.26	805.11	0.68295
01_qrt	10	15	283.03	1011.7	0.720243
01_qrt	10	15	260.52	1061.83	0.75465
01_qrt	10	15	245.56	803.5	0.6944
01_qrt	10	15	238.55	957.32	0.750815
01_qrt	10	15	293.06	1049.4	0.720736
01_qrt	10	15	166.02	762.58	0.782292
01_qrt	10	15	403.23	1000.57	0.597
01_qrt	10	15	315.19	1019.12	0.690733
01_qrt	10	15	327.1	855.8	0.617785
01_qrt	10	18	36.06	125.12	0.711797
01_qrt	10	18	93.32	158.75	0.412157
01_qrt	10	18	40.94	149.48	0.726117
01_qrt	10	18	37.27	136.42	0.7268
01_qrt	10	18	81.5	173.03	0.528983
01_qrt	10	18	49.27	177.56	0.722516
01_qrt	10	18	94.44	199.6	0.526904
01_qrt	10	18	67.82	271.33	0.750046
01_qrt	10	18	46.42	224.97	0.793661
01_qrt	10	18	65.98	153.89	0.571252
01_qrt	10	18	48.18	155.72	0.690599
01_qrt	10	18	29.07	172.45	0.831429
01_qrt	10	18	90.04	235.23	0.617183
01_qrt	10	18	35.39	134.35	0.736584
01_qrt	10	18	31.76	118.11	0.731098
01_qrt	10	18	76.06	187.62	0.594606
01_qrt	10	18	87.26	253.52	0.655806
01_qrt	10	18	61.64	253.53	0.756873
01_qrt	10	18	48.52	180.38	0.731012
01_qrt	10	18	113.84	184.62	0.383382
01_qrt	10	18	51.97	190.08	0.726589
01_qrt	10	18	74.35	344.48	0.784167
01_qrt	10	18	42.77	193.48	0.778944
01_qrt	10	18	54.39	248.75	0.781347
01_qrt	10	18	156.85	506.24	0.690167
01_qrt	10	18	58.25	196.22	0.703088
01_qrt	10	18	40.59	184.08	0.779498
01_qrt	10	18	128.34	534.71	0.759982
01_qrt	10	18	401.15	625.05	0.358211
01_qrt	10	18	123.38	461.15	0.732451
01_qrt	10	18	102.35	287.8	0.644371
01_qrt	10	18	75.07	365.43	0.794571
01_qrt	10	18	45.77	208.84	0.780837
01_qrt	10	18	107.37	222.21	0.516763
01_qrt	10	18	160.66	528.26	0.695869
01_qrt	10	18	182.01	656.58	0.722791
01_qrt	10	18	102.02	343.07	0.702626
01_qrt	10	18	371.9	760.78	0.51116
01_qrt	10	18	170.39	420.99	0.595264
01_qrt	10	18	274.46	629.51	0.56401
01_qrt	10	18	166.76	308.49	0.459431
01_qrt	10	18	210.88	415.46	0.492418
01_qrt	10	18	173.41	750.08	0.768811
01_qrt	10	18	131.34	412.64	0.681708
01_qrt	10	18	252.85	827.63	0.694501
01_qrt	10	18	195.39	724.26	0.730221
01_qrt	10	18	217.03	921.38	0.764451
01_qrt	10	18	131.42	476.53	0.724215
01_qrt	10	18	243.08	806.99	0.698782
01_qrt	10	18	146.34	623.87	0.765416
01_qrt	10	18	264.17	821.01	0.678238
01_qrt	10	18	139.96	489.46	0.714052
01_qrt	10	18	269.02	820.24	0.672023
01_qrt	10	18	291.79	1128.15	0.741355
01_qrt	10	18	240.43	930.44	0.741595
01_qrt	10	18	114.07	526.4	0.783302
01_qrt	10	18	217.03	823.88	0.736576
01_qrt	10	18	191.52	780.78	0.75472
01_qrt	10	18	148.35	643.33	0.769403
01_qrt	10	18	219.52	862.93	0.745611
01_qrt	10	18	321.85	965.27	0.66657
01_qrt	10	18	148.24	651.51	0.772467
01_qrt	10	18	210.02	789.14	0.733875
01_qrt	10	18	120.64	492.34	0.754986
01_qrt	10	18	271.99	856.74	0.682529
01_qrt	10	18	270.58	942.98	0.713048
01_qrt	10	18	240.92	870.04	0.723105
01_qrt	10	18	279.09	866.72	0.678004
01_qrt	10	18	335.58	821.56	0.591545
01_qrt	10	18	231.07	836.47	0.723756
01_qrt	10	18	236.74	927.11	0.744658
01_qrt	10	18	242.45	880.51	0.724648
01_qrt	10	18	208.13	875.05	0.762139
01_qrt	10	18	191.58	765.02	0.749575
01_qrt	10	18	281.39	1013.23	0.722284
01_qrt	10	18	280.89	959.37	0.707214
01_qrt	10	18	266.42	942.97	0.717467
01_qrt	10	18	212.08	858.97	0.7531
01_qrt	10	18	141.49	610.24	0.768157
01_qrt	10	18	196.94	808.38	0.756377
01_qrt	10	18	258.43	937.22	0.724248
01_qrt	10	18	265.67	913.98	0.709326
01_qrt	10	18	244.13	920.45	0.734782
01_qrt	10	18	257.24	1053.63	0.755863
01_qrt	10	18	173.48	770.32	0.774795
01_qrt	10	18	360.89	899.82	0.598942
01_qrt	10	18	297.1	934.32	0.682015
01_qrt	10	18	287.51	1137.41	0.747224
01_qrt	10	18	259.47	858.9	0.697904
01_qrt	10	18	215.47	967.32	0.777251
01_qrt	10	18	162.08	677.15	0.760629
01_qrt	10	18	201.08	855.72	0.765005
01_qrt	10	18	251.97	855.27	0.705391
01_qrt	10	18	214.3	845.27	0.746483
01_qrt	10	18	275.19	794.75	0.65374
01_qrt	10	18	242.92	889.97	0.727047
01_qrt	10	18	312.36	969.13	0.67769
01_qrt	10	18	271.04	1013.8	0.732649
01_qrt	10	18	339.43	1061.54	0.680257
01_qrt	10	18	312.94	921.86	0.660534
01_qrt	10	18	208.81	859.3	0.757
01_qrt	10	18	298.24	984.7	0.697126
01_qrt	10	18	255.49	857.78	0.70215
01_qrt	10	19	59.47	139.95	0.575134
01_qrt	10	19	110.7	176.2	0.371737
01_qrt	10	19	80.32	304.57	0.736284
01_qrt	10	19	36.33	134.76	0.73041
01_qrt	10	19	33.73	141.97	0.762415
01_qrt	10	19	47.45	229.43	0.793183
01_qrt	10	19	57.33	215.26	0.733671
01_qrt	10	19	39.72	171.71	0.76868
01_qrt	10	19	57.07	272.24	0.790369
01_qrt	10	19	56.79	214.02	0.734651
01_qrt	10	19	61.29	147.53	0.584559
01_qrt	10	19	102.2	183.28	0.442438
01_qrt	10	19	53.79	184.76	0.708866
01_qrt	10	19	72.46	272.36	0.733955
01_qrt	10	19	85.36	393.75	0.783213
01_qrt	10	19	154.03	486.14	0.683157
01_qrt	10	19	77.28	182.54	0.576641
01_qrt	10	19	151.76	381.42	0.602145
01_qrt	10	19	57.42	178.38	0.678103
01_qrt	10	19	344.4	531.98	0.352607
01_qrt	10	19	89.64	184.76	0.51483
01_qrt	10	19	188.78	564.68	0.665704
01_qrt	10	19	56.63	199.62	0.716261
01_qrt	10	19	101.08	261.57	0.613564
01_qrt	10	19	132.16	469.7	0.718629
01_qrt	10	19	45.97	212.45	0.78362
01_qrt	10	19	79.65	228.75	0.651803
01_qrt	10	19	215.34	569.04	0.621591
01_qrt	10	19	163.43	309.79	0.472417
01_qrt	10	19	124.72	296.76	0.579728
01_qrt	10	19	391.84	578.37	0.32251
01_qrt	10	19	323.52	541.46	0.402504
01_qrt	10	19	89.99	443.44	0.797064
01_qrt	10	19	116.66	488.02	0.760952
01_qrt	10	19	221.02	321.3	0.312076
01_qrt	10	19	74.61	192.06	0.611528
01_qrt	10	19	79.71	278.76	0.714055
01_qrt	10	19	73.28	302.62	0.757815
01_qrt	10	19	131.78	488.44	0.730202
01_qrt	10	19	215.65	598.95	0.639953
01_qrt	10	19	99.72	494.42	0.798309
01_qrt	10	19	259.12	795.53	0.67428
01_qrt	10	19	207.5	694.71	0.701314
01_qrt	10	19	249.19	770.89	0.67675
01_qrt	10	19	147.06	593.19	0.752086
01_qrt	10	19	264.88	967.41	0.726197
01_qrt	10	19	273.16	781.11	0.650305
01_qrt	10	19	244.99	732.03	0.665328
01_qrt	10	19	296.94	1141.65	0.739903
01_qrt	10	19	277.08	911.73	0.696094
01_qrt	10	19	220.62	759.79	0.70963
01_qrt	10	19	208.34	742	0.719218
01_qrt	10	19	309.35	891.89	0.653152
01_qrt	10	19	217.29	866.28	0.749169
01_qrt	10	19	173.36	695.77	0.750823
01_qrt	10	19	191.3	771.55	0.752058
01_qrt	10	19	206.4	816.63	0.747254
01_qrt	10	19	273.4	814.2	0.664198
01_qrt	10	19	124.46	472.09	0.736364
01_qrt	10	19	133.51	608.99	0.780752
01_qrt	10	19	234.66	796.82	0.705504
01_qrt	10	19	279.77	894.89	0.687381
01_qrt	10	19	368.74	820.56	0.550624
01_qrt	10	19	234.64	812.23	0.711116
01_qrt	10	19	243.37	881.88	0.724033
01_qrt	10	19	234.6	878.58	0.732978
01_qrt	10	19	175.88	680.95	0.741714
01_qrt	10	19	191.41	670.46	0.714524
01_qrt	10	19	212.33	815.8	0.739728
01_qrt	10	19	168.17	668.02	0.748256
01_qrt	10	19	286.47	976.33	0.706585
01_qrt	10	19	267.94	898.96	0.701944
01_qrt	10	19	199.4	726.78	0.725639
01_qrt	10	19	259.32	909.3	0.714803
01_qrt	10	19	279.91	916.62	0.694628
01_qrt	10	19	169.32	751.84	0.774793
01_qrt	10	19	233.75	880.16	0.734412
01_qrt	10	19	235.07	834.4	0.718277
01_qrt	10	19	254.08	901.01	0.718005
01_qrt	10	19	191.41	759.49	0.747976
01_qrt	10	19	253.83	1032.27	0.754105
01_qrt	10	19	278.34	899.54	0.690575
01_qrt	10	19	233.33	725.13	0.678223
01_qrt	10	19	183.21	791.9	0.768645
01_qrt	10	19	344.84	816.8	0.577816
01_qrt	10	19	220.44	971.59	0.773104
01_qrt	10	19	261.99	1081.05	0.757643
01_qrt	10	19	259.11	875.27	0.703966
01_qrt	10	19	250.56	883.73	0.716474
01_qrt	10	19	299.32	770.17	0.611359
01_qrt	10	19	260.12	859.57	0.697384
01_qrt	10	19	258.54	997.37	0.740778
01_qrt	10	19	247.19	994.7	0.751503
01_qrt	10	19	358.48	1018.9	0.648179
01_qrt	10	19	292.8	938.88	0.688139
01_qrt	10	19	291.37	805.78	0.6384
01_qrt	10	19	266.64	847.93	0.685528
01_qrt	10	22	89.48	173.73	0.48489
01_qrt	10	22	95.98	189.06	0.492278
01_qrt	10	22	64.44	295.51	0.78197
01_qrt	10	22	96.62	231.68	0.583002
01_qrt	10	22	109.89	179.97	0.389398
01_qrt	10	22	68	266.01	0.744371
01_qrt	10	22	108.5	182.15	0.404337
01_qrt	10	22	194.52	275.96	0.295115
01_qrt	10	22	51.13	190.54	0.731657
01_qrt	10	22	211.97	360.66	0.412272
01_qrt	10	22	171.07	460.41	0.628418
01_qrt	10	22	246.27	465.54	0.471001
01_qrt	10	22	93.64	233.68	0.599324
01_qrt	10	22	155.12	233.01	0.33432
01_qrt	10	22	169	224.79	0.248187
01_qrt	10	22	270.28	412.05	0.34406
01_qrt	10	22	66.18	215.08	0.692301
01_qrt	10	22	401.43	515.41	0.221144
01_qrt	10	22	45.58	218.46	0.791358
01_qrt	10	22	164.61	455.95	0.638974
01_qrt	10	22	138.8	513.06	0.729466
01_qrt	10	22	290.64	381.3	0.237739
01_qrt	10	22	141.46	291.51	0.514734
01_qrt	10	22	245.88	349.01	0.295493
01_qrt	10	22	159.56	690.87	0.769045
01_qrt	10	22	71.64	246.2	0.709017
01_qrt	10	22	259.49	334.54	0.224308
01_qrt	10	22	237.45	432.94	0.451541
01_qrt	10	22	161.25	672.99	0.760398
01_qrt	10	22	64.91	305.55	0.787563
01_qrt	10	22	272.21	652.81	0.583033
01_qrt	10	22	89.48	392.55	0.77208
01_qrt	10	22	250.53	430.8	0.418454
01_qrt	10	22	253.42	591.17	0.571325
01_qrt	10	22	230.77	652.41	0.646281
01_qrt	10	22	400.33	633.52	0.368086
01_qrt	10	22	240.49	842.54	0.714565
01_qrt	10	22	465.92	887.63	0.475097
01_qrt	10	22	144.96	689.95	0.789898
01_qrt	10	22	315.44	995.58	0.68316
01_qrt	10	22	167.88	791.66	0.787939
01_qrt	10	22	307.14	977.15	0.685678
01_qrt	10	22	315	883.22	0.64335
01_qrt	10	22	150.89	627.98	0.759722
01_qrt	10	22	242.72	731.64	0.668266
01_qrt	10	22	296.88	542.17	0.452423
01_qrt	10	22	454.06	894.81	0.492563
01_qrt	10	22	298.94	908.51	0.670956
01_qrt	10	22	209.85	601.14	0.65093
01_qrt	10	22	282.69	601.18	0.529775
01_qrt	10	22	487.28	947.63	0.485791
01_qrt	10	22	351.82	1061.27	0.668501
01_qrt	10	22	205.38	809.13	0.746172
01_qrt	10	22	274.06	862.61	0.68229
01_qrt	10	22	151.23	525.42	0.712173
01_qrt	10	22	256.48	820.13	0.687269
01_qrt	10	22	176.73	774.23	0.771747
01_qrt	10	22	257.23	852.11	0.698126
01_qrt	10	22	374.14	766.13	0.511649
01_qrt	10	22	351.01	856.38	0.590124
01_qrt	10	22	363.1	1023.22	0.64515
01_qrt	10	22	198.91	539.63	0.631396
01_qrt	10	22	233.72	656.22	0.643824
01_qrt	10	22	197.74	823.37	0.759841
01_qrt	10	22	355.06	1058.74	0.664639
01_qrt	10	22	317.21	962.74	0.670524
01_qrt	10	22	192.72	852.78	0.77401
01_qrt	10	22	201.29	693.04	0.709555
01_qrt	10	22	252.59	699.22	0.638769
01_qrt	10	22	274.11	813.65	0.663098
01_qrt	10	22	217.19	882.9	0.754004
01_qrt	10	22	259.15	803.29	0.677402
01_qrt	10	22	552.77	805.28	0.313568
01_qrt	10	22	244.79	721.57	0.660754
01_qrt	10	22	266.94	765.52	0.651296
01_qrt	10	22	369.29	926.3	0.601317
01_qrt	10	22	262.55	943.68	0.721781
01_qrt	10	22	193.91	846.05	0.770806
01_qrt	10	22	207.12	976.21	0.787833
01_qrt	10	22	286.99	1008.13	0.715324
01_qrt	10	22	443.21	1042.36	0.574801
01_qrt	10	22	326.69	963.23	0.660839
01_qrt	10	22	275	1061.56	0.740938
01_qrt	10	22	263.07	853.54	0.691789
01_qrt	10	22	346.67	879.6	0.605878
01_qrt	10	22	230.32	902.85	0.744897
01_qrt	10	22	258.12	921.63	0.71992
01_qrt	10	22	328.94	1158.21	0.715993
01_qrt	10	22	189.11	724.64	0.739029
01_qrt	10	22	310.93	894.52	0.652406
01_qrt	10	22	268.71	855.55	0.68591
01_qrt	10	22	277.5	956	0.709728
01_qrt	10	22	281.55	1092.39	0.742272
01_qrt	10	22	263.09	927.65	0.716391
01_qrt	10	22	263.97	946.25	0.721025
01_qrt	10	22	270.77	869.91	0.688738
01_qrt	10	22	285.61	878.24	0.674793
01_qrt	10	22	303.98	952.06	0.680713
01_qrt	10	22	280.16	996.53	0.718864
01_qrt	10	22	300.46	1003.29	0.700525
01_qrt	10	22	337.18	868.77	0.611888
01_qrt	10	26	72.01	189.54	0.62008
01_qrt	10	26	99.26	232.95	0.5739
01_qrt	10	26	77.78	201.15	0.613323
01_qrt	10	26	150.67	256.13	0.411744
01_qrt	10	26	97.12	294.92	0.67069
01_qrt	10	26	165.68	248.75	0.33395
01_qrt	10	26	119.21	239.87	0.503022
01_qrt	10	26	112.43	220.99	0.491289
01_qrt	10	26	66.68	208.07	0.679531
01_qrt	10	26	212.31	449.98	0.528179
01_qrt	10	26	160.37	385.82	0.584314
01_qrt	10	26	171.29	301.85	0.4325
01_qrt	10	26	302.76	338.32	0.105108
01_qrt	10	26	156.35	403.18	0.612208
01_qrt	10	26	179.55	406.25	0.558031
01_qrt	10	26	133.34	444.12	0.699766
01_qrt	10	26	177.29	310.61	0.42922
01_qrt	10	26	215.33	367.87	0.41463
01_qrt	10	26	129.99	459.64	0.717192
01_qrt	10	26	75.43	284.82	0.735131
01_qrt	10	26	218.87	512.33	0.572795
01_qrt	10	26	240.48	463.34	0.480964
01_qrt	10	26	154.26	392.64	0.607096
01_qrt	10	26	65.14	304.16	0.785804
01_qrt	10	26	206.44	379.05	0.455375
01_qrt	10	26	230.82	447.33	0.484005
01_qrt	10	26	142.18	381.09	0.626912
01_qrt	10	26	84.51	338.71	0.750495
01_qrt	10	26	301.16	410.67	0.266662
01_qrt	10	26	204.51	627.88	0.674285
01_qrt	10	26	122.62	555.28	0.779174
01_qrt	10	26	158.14	350.78	0.549176
01_qrt	10	26	445.26	546.42	0.185132
01_qrt	10	26	225.09	424	0.469127
01_qrt	10	26	190.8	844.54	0.774078
01_qrt	10	26	217.91	441.73	0.50669
01_qrt	10	26	690.54	804.72	0.141888
01_qrt	10	26	296.39	581.49	0.490292
01_qrt	10	26	168.44	298.34	0.435409
01_qrt	10	26	314.3	738.53	0.574411
01_qrt	10	26	158.45	796.84	0.801152
01_qrt	10	26	276.15	751.42	0.632496
01_qrt	10	26	188.38	848.02	0.777859
01_qrt	10	26	183.49	856.49	0.785777
01_qrt	10	26	139.85	619.61	0.774294
01_qrt	10	26	283.12	871.14	0.674989
01_qrt	10	26	277.45	854.2	0.675193
01_qrt	10	26	431.86	1012.96	0.573665
01_qrt	10	26	163.18	795.22	0.794811
01_qrt	10	26	206.5	829.14	0.750947
01_qrt	10	26	207.29	738.82	0.719431
01_qrt	10	26	196.96	796.56	0.752737
01_qrt	10	26	216.83	585.02	0.629346
01_qrt	10	26	171.27	652	0.737316
01_qrt	10	26	391.57	710.08	0.448555
01_qrt	10	26	182.64	805.85	0.773357
01_qrt	10	26	231.48	857.1	0.729926
01_qrt	10	26	197.95	892.91	0.778309
01_qrt	10	26	451.01	820.9	0.450591
01_qrt	10	26	309.78	1039.82	0.702083
01_qrt	10	26	260.01	770.37	0.662487
01_qrt	10	26	201.53	819.02	0.753925
01_qrt	10	26	215.4	795.94	0.729377
01_qrt	10	26	235.37	910.13	0.741389
01_qrt	10	26	326.71	994.74	0.671562
01_qrt	10	26	258.29	978.86	0.736132
01_qrt	10	26	219.08	965.18	0.773016
01_qrt	10	26	292.37	1012.63	0.711267
01_qrt	10	26	279.71	965.28	0.710229
01_qrt	10	26	265.78	938.6	0.716823
01_qrt	10	26	265.18	950.3	0.720951
01_qrt	10	26	254.99	961.84	0.734894
01_qrt	10	26	335.98	1120.37	0.700117
01_qrt	10	26	265.98	796.37	0.66601
01_qrt	10	26	271.49	973.83	0.721204
01_qrt	10	26	267.93	888.59	0.698477
01_qrt	10	26	326.82	923.6	0.646135
01_qrt	10	26	324.26	1039.46	0.68804
01_qrt	80	8	153.72	502.54	0.694094
01_qrt	80	8	199.62	961.43	0.792372
01_qrt	80	8	239.06	1178.72	0.797195
01_qrt	80	8	204.43	986.84	0.792844
01_qrt	80	8	162.16	799.85	0.797262
01_qrt	80	8	191.93	922.51	0.791948
01_qrt	80	8	171.39	808.32	0.787968
01_qrt	80	8	207.07	1004.8	0.793919
01_qrt	80	8	172.12	850.3	0.797566
01_qrt	80	8	234.7	1070.24	0.780703
01_qrt	80	8	241.71	1086.43	0.777519
01_qrt	80	8	209.11	1022.83	0.795557
01_qrt	80	8	224.96	1081.2	0.791935
01_qrt	80	8	214.43	1045.63	0.794927
01_qrt	80	8	223.13	1118.91	0.800583
01_qrt	80	8	302.94	1305.08	0.767876
01_qrt	80	8	318.63	1357.39	0.765263
01_qrt	80	8	207.64	971.53	0.786275
01_qrt	80	8	289.71	1286.25	0.774764
01_qrt	80	8	224.37	1081.08	0.792458
01_qrt	80	8	248.08	1154.1	0.785045
01_qrt	80	8	225.05	1052.6	0.786196
01_qrt	80	8	266.84	1178.1	0.7735
01_qrt	80	8	213.5	1032.35	0.793181
01_qrt	80	8	187.36	888.96	0.789237
01_qrt	80	8	204.09	990.26	0.793903
01_qrt	80	8	245.97	1200.01	0.795027
01_qrt	80	8	195.93	940.98	0.791792
01_qrt	80	8	213.69	1028	0.79213
01_qrt	80	8	259.5	1182.18	0.780482
01_qrt	80	8	193.34	927.91	0.79165
01_qrt	80	8	194.95	922.16	0.788594
01_qrt	80	8	192.94	919.35	0.790123
01_qrt	80	8	202.71	938.97	0.784115
01_qrt	80	8	189.36	859.19	0.779606
01_qrt	80	8	181.61	879.04	0.7934
01_qrt	80	8	189.66	911.74	0.79198
01_qrt	80	8	212.4	1003.87	0.788419
01_qrt	80	8	218.29	960.11	0.772651
01_qrt	80	8	209.38	999.83	0.790584
01_qrt	80	8	253.39	1149.6	0.779584
01_qrt	80	8	294.72	1344.43	0.780777
01_qrt	80	8	220.04	1054.02	0.791237
01_qrt	80	8	220.68	1064.76	0.792742
01_qrt	80	8	256.86	1205.98	0.787011
01_qrt	80	8	261.26	1281.35	0.796106
01_qrt	80	8	289.63	1281.3	0.773956
01_qrt	80	8	200.89	961.05	0.790968
01_qrt	80	8	292.11	1290.9	0.773716
01_qrt	80	8	254.24	1236.86	0.794447
01_qrt	80	8	231.41	1145.55	0.797992
01_qrt	80	8	213.27	1045.78	0.796066
01_qrt	80	8	250	1209.17	0.793247
01_qrt	80	8	302.35	1266.58	0.761286
01_qrt	80	8	226.32	1072.45	0.788979
01_qrt	80	8	244.13	1232.25	0.801883
01_qrt	80	8	305.18	1345.66	0.773212
01_qrt	80	8	207.39	1080.11	0.808001
01_qrt	80	8	259.83	1235.3	0.789662
01_qrt	80	8	223.73	1131.02	0.802187
01_qrt	80	8	353.14	1395.91	0.747011
01_qrt	80	8	294.86	1316.78	0.776075
01_qrt	80	8	273.94	1290.07	0.787655
01_qrt	80	8	253.78	1145.9	0.778541
01_qrt	80	8	311.14	1330.74	0.766198
01_qrt	80	8	314.18	1427.31	0.77988
01_qrt	80	8	244.42	1184.52	0.793655
01_qrt	80	8	301.58	1425.98	0.78851
01_qrt	80	10	271.16	497.33	0.454748
01_qrt	80	10	304.11	539.78	0.436622
01_qrt	80	10	172.65	522.89	0.669816
01_qrt	80	10	362.42	734.44	0.506536
01_qrt	80	10	408.73	834.01	0.509922
01_qrt	80	10	156.01	635.14	0.754369
01_qrt	80	10	207	632.61	0.672784
01_qrt	80	10	442.6	943.2	0.530746
01_qrt	80	10	170.51	738.7	0.769176
01_qrt	80	10	323.45	895.33	0.638737
01_qrt	80	10	224.53	614.81	0.634798
01_qrt	80	10	275.85	695.57	0.603419
01_qrt	80	10	262.81	1004.5	0.738367
01_qrt	80	10	407.47	1059.57	0.615438
01_qrt	80	10	464.47	990	0.530838
01_qrt	80	10	308.31	882.13	0.650494
01_qrt	80	10	277.09	859.6	0.677652
01_qrt	80	10	385.28	933.08	0.587088
01_qrt	80	10	249.02	728.25	0.658057
01_qrt	80	10	477.12	1147.42	0.58418
01_qrt	80	10	258.5	817.02	0.683606
01_qrt	80	10	386.53	692.77	0.442051
01_qrt	80	10	252.97	785.3	0.677868
01_qrt	80	10	299.36	780.14	0.616274
01_qrt	80	10	257.49	682.94	0.622968
01_qrt	80	10	390.95	1098.93	0.644245
01_qrt	80	10	326.39	1021.91	0.680608
01_qrt	80	10	261.86	945.66	0.723093
01_qrt	80	10	455.07	972.34	0.531985
01_qrt	80	10	312.97	730.79	0.571737
01_qrt	80	10	285.58	797.74	0.642014
01_qrt	80	10	305.86	1058.36	0.711006
01_qrt	80	10	356.69	1143.79	0.688151
01_qrt	80	10	225.55	1113.48	0.797437
01_qrt	80	10	201.7	751.17	0.731486
01_qrt	80	10	363.62	1401.32	0.740516
01_qrt	80	10	253.67	919.19	0.724029
01_qrt	80	10	347.79	871.59	0.600971
01_qrt	80	10	287.45	815.17	0.647374
01_qrt	80	10	413.72	832.35	0.502949
01_qrt	80	10	456.05	966.74	0.52826
01_qrt	80	10	288.23	802.05	0.640646
01_qrt	80	10	463.25	1151.13	0.597569
01_qrt	80	10	282.4	794.19	0.644418
01_qrt	80	10	301.93	764.81	0.605235
01_qrt	80	10	339.91	1070.64	0.682517
01_qrt	80	10	313.91	1017.81	0.691573
01_qrt	80	10	371.39	1306.3	0.715693
01_qrt	80	10	250.02	810.95	0.691695
01_qrt	80	10	260.9	819.44	0.681612
01_qrt	80	10	324.52	1201.26	0.72985
01_qrt	80	10	261.48	962.24	0.728249
01_qrt	80	10	264.63	943.25	0.719449
01_qrt	80	10	323.73	846.81	0.617706
01_qrt	80	10	324.17	1218.23	0.733901
01_qrt	80	10	342.2	1350.01	0.74652
01_qrt	80	10	370.1	1253.77	0.70481
01_qrt	80	10	310.53	1212.45	0.743874
01_qrt	80	10	233.82	1144.3	0.795665
01_qrt	80	10	307.42	1106.37	0.722136
01_qrt	80	10	412.98	1451.24	0.71543
01_qrt	80	10	300.35	976.51	0.692425
01_qrt	80	10	279.68	902.22	0.690009
01_qrt	80	10	252.48	1225.95	0.794054
01_qrt	80	10	418.69	1158.64	0.638637
01_qrt	80	10	374.05	1141.12	0.672208
01_qrt	80	10	253.8	967.27	0.737612
01_qrt	80	10	192.98	952.17	0.797316
01_qrt	80	10	297.82	1120.58	0.734227
01_qrt	80	10	358.54	1172.27	0.694149
01_qrt	80	12	239.51	419.9	0.429602
01_qrt	80	12	230.89	351.03	0.34225
01_qrt	80	12	241.81	371.95	0.349886
01_qrt	80	12	389.46	501.53	0.223456
01_qrt	80	12	218.06	358.5	0.391743
01_qrt	80	12	306.62	393.66	0.221105
01_qrt	80	12	325.57	463.08	0.296947
01_qrt	80	12	285.85	447.11	0.360672
01_qrt	80	12	266.64	677.51	0.606426
01_qrt	80	12	162.97	486.94	0.665298
01_qrt	80	12	212.63	570.87	0.627533
01_qrt	80	12	230.88	536.16	0.569382
01_qrt	80	12	254.5	585.43	0.565277
01_qrt	80	12	307.95	795.15	0.612715
01_qrt	80	12	243.93	584.89	0.582947
01_qrt	80	12	361.8	518.13	0.30172
01_qrt	80	12	207.94	526.88	0.605337
01_qrt	80	12	254.67	763.33	0.66637
01_qrt	80	12	294.71	694.52	0.575664
01_qrt	80	12	293.86	892.96	0.670915
01_qrt	80	12	227.76	685.99	0.667998
01_qrt	80	12	271.77	789.62	0.655822
01_qrt	80	12	241.09	779.39	0.690668
01_qrt	80	12	263.34	810.12	0.674937
01_qrt	80	12	262.17	786.96	0.66687
01_qrt	80	12	643.53	759.01	0.152146
01_qrt	80	12	156.04	647.48	0.759004
01_qrt	80	12	241.32	710.19	0.660204
01_qrt	80	12	289.81	844.46	0.656822
01_qrt	80	12	230.52	719.74	0.679718
01_qrt	80	12	242	752	0.678191
01_qrt	80	12	243.75	685.83	0.644606
01_qrt	80	12	407.71	969.69	0.579546
01_qrt	80	12	304.92	830.91	0.633029
01_qrt	80	12	215.79	725.95	0.702748
01_qrt	80	12	284.48	866.02	0.671509
01_qrt	80	12	197.87	778.19	0.74573
01_qrt	80	12	260.84	745.21	0.649978
01_qrt	80	12	309.86	944.1	0.671793
01_qrt	80	12	192.52	695.13	0.723045
01_qrt	80	12	182.75	816.75	0.776247
01_qrt	80	12	278.85	760.56	0.633362
01_qrt	80	12	305.44	670.64	0.544554
01_qrt	80	12	342.12	640.25	0.465646
01_qrt	80	12	258.12	795.8	0.675647
01_qrt	80	12	386.89	1153.75	0.664667
01_qrt	80	12	287.34	691.95	0.584739
01_qrt	80	12	393.38	1083.12	0.636799
01_qrt	80	12	230.2	712.32	0.676831
01_qrt	80	12	436.68	1035.46	0.578274
01_qrt	80	12	285.04	987.65	0.711396
01_qrt	80	12	512.84	1000.23	0.487278
01_qrt	80	12	364.69	1071.58	0.65968
01_qrt	80	12	429.57	709.36	0.394426
01_qrt	80	12	342.44	726.63	0.528729
01_qrt	80	12	414.61	1092.33	0.620435
01_qrt	80	12	281.36	819.54	0.656685
01_qrt	80	12	423.72	896.85	0.527558
01_qrt	80	12	198.54	929.64	0.786433
01_qrt	80	12	511.48	1269.08	0.596968
01_qrt	80	12	553.36	1021.92	0.4585
01_qrt	80	12	380.22	983.93	0.61357
01_qrt	80	12	416.33	999.47	0.583449
01_qrt	80	12	284.54	942.44	0.698082
01_qrt	80	12	351.74	833.72	0.578096
01_qrt	80	12	469.24	934.97	0.498134
01_qrt	80	12	406.48	854.6	0.524362
01_qrt	80	12	489.17	1155.78	0.576762
01_qrt	80	12	339.61	881.82	0.614876
01_qrt	80	12	200.63	903.42	0.777922
01_qrt	80	12	346.85	851.21	0.592533
01_qrt	80	12	237.84	925.38	0.742992
01_qrt	80	12	490.23	1037.48	0.52748
01_qrt	80	12	458.57	1124.62	0.592244
01_qrt	80	12	571.8	1397.56	0.590866
01_qrt	80	12	454.88	1198.95	0.62061
01_qrt	80	12	392.17	863.53	0.545852
01_qrt	80	12	266.47	1137.97	0.765837
01_qrt	80	12	398.95	961.41	0.585037
01_qrt	80	12	614.29	1056.1	0.418341
01_qrt	80	12	223.74	984.02	0.772627
01_qrt	80	12	515.66	1073.91	0.519829
01_qrt	80	12	550.73	1135.1	0.514809
01_qrt	80	12	609.83	1216.68	0.498767
01_qrt	80	15	138.25	187.58	0.262981
01_qrt	80	15	121.3	194.31	0.37574
01_qrt	80	15	91.68	204.82	0.552339
01_qrt	80	15	110.03	243.33	0.547816
01_qrt	80	15	314.14	405.19	0.224709
01_qrt	80	15	177.52	270.86	0.344606
01_qrt	80	15	256.04	336.79	0.239764
01_qrt	80	15	264.96	311.43	0.149215
01_qrt	80	15	230.01	325.59	0.293559
01_qrt	80	15	120.9	267.52	0.548034
01_qrt	80	15	218.78	508.21	0.569489
01_qrt	80	15	203.13	258.05	0.212827
01_qrt	80	15	242.5	582.49	0.583684
01_qrt	80	15	119.4	385.29	0.690104
01_qrt	80	15	201.74	586.15	0.655822
01_qrt	80	15	231.09	494.15	0.532348
01_qrt	80	15	302.28	397.5	0.239547
01_qrt	80	15	292.13	767.55	0.619399
01_qrt	80	15	214.21	553.87	0.613249
01_qrt	80	15	174.9	499.28	0.649696
01_qrt	80	15	169.83	537.02	0.683755
01_qrt	80	15	166.14	426.72	0.610681
01_qrt	80	15	224.7	535.04	0.580031
01_qrt	80	15	210.62	483.54	0.564441
01_qrt	80	15	249.28	674.48	0.630412
01_qrt	80	15	134.1	470.99	0.715281
01_qrt	80	15	168.09	515.05	0.673643
01_qrt	80	15	344.89	544.15	0.366204
01_qrt	80	15	460.47	790.04	0.417143
01_qrt	80	15	136.29	464.45	0.706556
01_qrt	80	15	195.75	565.61	0.653913
01_qrt	80	15	182.08	534.04	0.659033
01_qrt	80	15	459.12	939.66	0.511408
01_qrt	80	15	264.56	545.57	0.515058
01_qrt	80	15	256.58	744.45	0.655343
01_qrt	80	15	130.15	549.76	0.76326
01_qrt	80	15	169.24	517.08	0.672701
01_qrt	80	15	148.47	477.5	0.689068
01_qrt	80	15	140.94	565.11	0.750597
01_qrt	80	15	216.39	500.96	0.568049
01_qrt	80	15	192.99	538.06	0.641323
01_qrt	80	15	203.73	592.95	0.656413
01_qrt	80	15	254.03	431.66	0.411504
01_qrt	80	15	303.07	951.56	0.681502
01_qrt	80	15	146.26	518.17	0.717757
01_qrt	80	15	370.2	846.36	0.562609
01_qrt	80	15	179.04	654.15	0.726301
01_qrt	80	15	176.92	702.48	0.748149
01_qrt	80	15	279.59	641.14	0.563933
01_qrt	80	15	272.19	740.5	0.632424
01_qrt	80	15	239.22	663.43	0.639419
01_qrt	80	15	174.54	721.66	0.758127
01_qrt	80	15	133.58	560.45	0.761656
01_qrt	80	15	277.99	635.26	0.5624
01_qrt	80	15	281.62	776.2	0.637181
01_qrt	80	15	200.84	699.24	0.712774
01_qrt	80	15	193.91	695.51	0.721212
01_qrt	80	15	424.55	717.14	0.407996
01_qrt	80	15	177.13	595.72	0.702662
01_qrt	80	15	150.41	545.81	0.724428
01_qrt	80	15	183.8	518.75	0.645687
01_qrt	80	15	391.48	805.12	0.513774
01_qrt	80	15	337.35	696.44	0.515608
01_qrt	80	15	290.62	712.97	0.592395
01_qrt	80	15	315.18	1003.3	0.685857
01_qrt	80	15	250.19	568.82	0.56016
01_qrt	80	15	277.34	740.33	0.625383
01_qrt	80	15	340.21	867.94	0.608026
01_qrt	80	15	325.63	647.92	0.497423
01_qrt	80	15	186.74	683.11	0.726633
01_qrt	80	15	264.23	899.84	0.70637
01_qrt	80	15	354.96	703.39	0.495358
01_qrt	80	15	402.59	850.49	0.526638
01_qrt	80	15	196.03	720.89	0.728072
01_qrt	80	15	466.43	868.99	0.46325
01_qrt	80	18	69.11	97.32	0.289868
01_qrt	80	18	69.27	104.5	0.337129
01_qrt	80	18	79.13	177.9	0.555143
01_qrt	80	18	38.67	92.31	0.581085
01_qrt	80	18	75.26	127.15	0.408101
01_qrt	80	18	86	196.45	0.56223
01_qrt	80	18	116.87	181.22	0.355093
01_qrt	80	18	56.33	202.36	0.721684
01_qrt	80	18	156.1	193.1	0.191611
01_qrt	80	18	78.01	154.42	0.494884
01_qrt	80	18	122.54	241.55	0.492693
01_qrt	80	18	132.71	273.79	0.515322
01_qrt	80	18	194.11	250.06	0.223746
01_qrt	80	18	182.38	221.34	0.176019
01_qrt	80	18	140.01	373.85	0.625492
01_qrt	80	18	184.88	271.57	0.319181
01_qrt	80	18	149.14	449.16	0.667958
01_qrt	80	18	183.62	645.24	0.715424
01_qrt	80	18	219.57	578.95	0.620727
01_qrt	80	18	146.61	522.1	0.719173
01_qrt	80	18	226.45	286.6	0.209874
01_qrt	80	18	186.06	613.63	0.696804
01_qrt	80	18	237.98	578.6	0.588697
01_qrt	80	18	236.7	429.33	0.448676
01_qrt	80	18	213.09	661.16	0.677688
01_qrt	80	18	214.2	510.47	0.580387
01_qrt	80	18	108.05	410.79	0.736995
01_qrt	80	18	213.84	365.35	0.414671
01_qrt	80	18	153.87	506.2	0.696029
01_qrt	80	18	171.71	555.94	0.691136
01_qrt	80	18	204.44	326.43	0.373679
01_qrt	80	18	216	721	0.700416
01_qrt	80	18	192.7	566.64	0.659925
01_qrt	80	18	322.1	698.43	0.538823
01_qrt	80	18	213.71	674.01	0.682928
01_qrt	80	18	120.5	409.5	0.705739
01_qrt	80	18	230.44	674.64	0.658425
01_qrt	80	18	237.68	592.91	0.59913
01_qrt	80	18	130.93	410.19	0.680831
01_qrt	80	18	169.17	553.98	0.694628
01_qrt	80	18	286.19	730.93	0.608471
01_qrt	80	18	133.37	514.13	0.740571
01_qrt	80	18	145.65	527.17	0.723713
01_qrt	80	18	114.92	452.34	0.745943
01_qrt	80	18	187.2	656.67	0.71491
01_qrt	80	18	137.17	499.61	0.725446
01_qrt	80	18	209.02	564.28	0.629581
01_qrt	80	18	181.41	574.6	0.684285
01_qrt	80	18	119.56	439.94	0.728236
01_qrt	80	18	132.56	398.8	0.667578
01_qrt	80	18	142.65	372.79	0.617345
01_qrt	80	18	253.26	421.26	0.398804
01_qrt	80	18	159.59	630.9	0.747044
01_qrt	80	18	142.73	408.11	0.65029
01_qrt	80	18	158.18	529.77	0.701418
01_qrt	80	18	130.17	493.66	0.736316
01_qrt	80	18	288.56	669.82	0.569183
01_qrt	80	18	156.08	643.14	0.757316
01_qrt	80	18	149.31	493.48	0.697435
01_qrt	80	18	158.71	549.03	0.710927
01_qrt	80	18	207.94	483.74	0.570141
01_qrt	80	18	209.44	709.23	0.704708
01_qrt	80	18	177.08	567.41	0.687915
01_qrt	80	18	166.39	644.16	0.741695
01_qrt	80	18	230.21	719.56	0.680068
01_qrt	80	18	210.27	558.77	0.623691
01_qrt	80	18	212.57	601.55	0.64663
01_qrt	80	18	200.77	667.11	0.699045
01_qrt	80	18	192.23	720.23	0.733099
01_qrt	80	18	176.34	524.76	0.663961
01_qrt	80	18	235.38	664.81	0.645944
01_qrt	80	18	253.9	954.62	0.73403
01_qrt	80	18	150.15	560.67	0.732178
01_qrt	80	18	186.75	618.06	0.697845
01_qrt	80	18	137.08	424.44	0.677057
01_qrt	80	18	155.87	691.27	0.774502
01_qrt	80	18	150.97	626.23	0.758922
01_qrt	80	18	271.74	783.11	0.652999
01_qrt	80	18	188.08	524.24	0.641233
01_qrt	80	19	29.82	92.18	0.676502
01_qrt	80	19	67.98	97.8	0.304908
01_qrt	80	19	27.66	83.11	0.667308
01_qrt	80	19	50.52	95.47	0.470724
01_qrt	80	19	50.46	128.6	0.607621
01_qrt	80	19	41.27	91.16	0.54717
01_qrt	80	19	77.38	110.7	0.300903
01_qrt	80	19	73.79	94.42	0.218492
01_qrt	80	19	36.59	93.16	0.607128
01_qrt	80	19	89.57	149.26	0.399906
01_qrt	80	19	97.42	137.51	0.291542
01_qrt	80	19	58.63	114.91	0.489775
01_qrt	80	19	34.12	96.76	0.647478
01_qrt	80	19	84.09	170.28	0.506166
01_qrt	80	19	114.09	156.64	0.271642
01_qrt	80	19	88.74	262.71	0.662213
01_qrt	80	19	108.32	149.75	0.276661
01_qrt	80	19	105.79	349.93	0.697711
01_qrt	80	19	132.85	487.41	0.727437
01_qrt	80	19	111.6	425.61	0.737788
01_qrt	80	19	144.27	382.93	0.623247
01_qrt	80	19	147.25	484.78	0.696254
01_qrt	80	19	31.73	143.26	0.778584
01_qrt	80	19	142.83	293.7	0.513687
01_qrt	80	19	118.49	195.8	0.394842
01_qrt	80	19	91.38	132.02	0.307832
01_qrt	80	19	154.25	268.94	0.426415
01_qrt	80	19	198.44	474.88	0.582147
01_qrt	80	19	171.21	398.45	0.57031
01_qrt	80	19	202.03	464.86	0.565375
01_qrt	80	19	129.52	453.56	0.714437
01_qrt	80	19	94.07	360.46	0.739
01_qrt	80	19	112.85	391.26	0.711573
01_qrt	80	19	171.63	508.27	0.662325
01_qrt	80	19	93.79	328.64	0.714612
01_qrt	80	19	123.98	448.85	0.723783
01_qrt	80	19	138.35	442.93	0.687648
01_qrt	80	19	241.2	506.44	0.523715
01_qrt	80	19	79.99	304.46	0.737273
01_qrt	80	19	181.7	497.57	0.634825
01_qrt	80	19	112.52	431.94	0.739501
01_qrt	80	19	221.11	697.84	0.683151
01_qrt	80	19	107.72	398.11	0.729422
01_qrt	80	19	140.08	444.79	0.685065
01_qrt	80	19	168.46	270.78	0.377871
01_qrt	80	19	103.68	406.21	0.744763
01_qrt	80	19	86.2	278.21	0.690162
01_qrt	80	19	168.85	589.21	0.71343
01_qrt	80	19	170.26	514.61	0.669148
01_qrt	80	19	107.4	369.29	0.709172
01_qrt	80	19	125.11	313.08	0.60039
01_qrt	80	19	106.11	418.26	0.746306
01_qrt	80	19	115.49	413.39	0.720627
01_qrt	80	19	130.69	532.4	0.754527
01_qrt	80	19	131.16	403.41	0.674872
01_qrt	80	19	196.22	494.8	0.603436
01_qrt	80	19	108.17	366.71	0.705026
01_qrt	80	19	119.03	410.94	0.710347
01_qrt	80	19	149.96	563.09	0.733702
01_qrt	80	19	123.84	452.38	0.726248
01_qrt	80	19	147.32	408.84	0.639663
01_qrt	80	19	125.22	338.6	0.630183
01_qrt	80	19	147.48	536.2	0.724953
01_qrt	80	19	132.88	560.36	0.762867
01_qrt	80	19	198.03	409.9	0.516882
01_qrt	80	19	183.99	566.83	0.675423
01_qrt	80	19	162.08	503.22	0.677914
01_qrt	80	19	202.91	569.74	0.643855
01_qrt	80	19	152.32	521.89	0.708138
01_qrt	80	19	101.14	317.37	0.681318
01_qrt	80	19	144.8	561.32	0.742054
01_qrt	80	19	145.58	574.06	0.746403
01_qrt	80	19	134.82	388.67	0.653125
01_qrt	80	19	207.99	790.19	0.736785
01_qrt	80	19	130.11	356.7	0.63524
01_qrt	80	19	171.87	537.15	0.680052
01_qrt	80	19	119.27	507.29	0.764868
01_qrt	80	19	161.3	685.13	0.76457
01_qrt	80	19	219.72	640.14	0.656763
01_qrt	80	19	137.07	538.25	0.74536
01_qrt	80	22	43.24	93.76	0.538823
01_qrt	80	22	39.71	124.77	0.681734
01_qrt	80	22	70.76	120.72	0.41385
01_qrt	80	22	62.45	131.6	0.525532
01_qrt	80	22	49.51	135.48	0.634559
01_qrt	80	22	35.45	141.77	0.749947
01_qrt	80	22	86.99	168.04	0.482326
01_qrt	80	22	87.7	144.57	0.393373
01_qrt	80	22	158.49	314.68	0.496377
01_qrt	80	22	77.4	171.06	0.547527
01_qrt	80	22	66.1	238	0.722311
01_qrt	80	22	78.94	300.57	0.737366
01_qrt	80	22	94.54	204.03	0.536637
01_qrt	80	22	89.67	195.25	0.540743
01_qrt	80	22	67.33	244.19	0.724231
01_qrt	80	22	91.19	345.31	0.735918
01_qrt	80	22	82.71	188.18	0.560474
01_qrt	80	22	70.86	223.31	0.682683
01_qrt	80	22	137.14	430.4	0.681366
01_qrt	80	22	72.82	249.18	0.707761
01_qrt	80	22	90.26	291.84	0.690721
01_qrt	80	22	100.97	352.84	0.713808
01_qrt	80	22	125.63	414.52	0.696902
01_qrt	80	22	126.92	349.45	0.636801
01_qrt	80	22	179.15	692.1	0.74115
01_qrt	80	22	108.26	337.87	0.679581
01_qrt	80	22	92.78	393.86	0.764409
01_qrt	80	22	160.3	394.18	0.593333
01_qrt	80	22	92.58	344.15	0.730989
01_qrt	80	22	86.02	303.82	0.716872
01_qrt	80	22	92.99	363.61	0.744259
01_qrt	80	22	160.09	375.66	0.573843
01_qrt	80	22	95.83	320.61	0.701101
01_qrt	80	22	118.06	380.69	0.689879
01_qrt	80	22	84.3	249.15	0.66165
01_qrt	80	22	150.06	325.11	0.538433
01_qrt	80	22	97.26	391.51	0.751577
01_qrt	80	22	133.16	350.2	0.61976
01_qrt	80	22	109.38	349.49	0.68703
01_qrt	80	22	144.58	523.2	0.723662
01_qrt	80	22	136.87	544.62	0.748669
01_qrt	80	22	184.18	484.88	0.620153
01_qrt	80	22	103.92	475.74	0.781561
01_qrt	80	22	138.27	577.82	0.760704
01_qrt	80	22	131	575.87	0.772518
01_qrt	80	22	178.04	470.91	0.621924
01_qrt	80	22	302.31	660.97	0.542627
01_qrt	80	22	142.48	624.83	0.77197
01_qrt	80	22	155.62	563.06	0.723617
01_qrt	80	22	142.62	661.09	0.784265
01_qrt	80	22	209.57	526.79	0.602156
01_qrt	80	22	203.29	731.27	0.722004
01_qrt	80	22	148.8	594.81	0.749836
01_qrt	80	22	223.22	622.56	0.641448
01_qrt	80	22	165.68	641.69	0.741807
01_qrt	80	26	68.75	153.17	0.551152
01_qrt	80	26	68.29	176.61	0.613329
01_qrt	80	26	49.03	151.08	0.67547
01_qrt	80	26	72.95	117.89	0.381203
01_qrt	80	26	94.04	196.07	0.520324
01_qrt	80	26	71.14	182.36	0.609893
01_qrt	80	26	121.54	189.45	0.358459
01_qrt	80	26	69.73	163.78	0.574246
01_qrt	80	26	161.35	214.22	0.246802
01_qrt	80	26	81.49	232.83	0.650002
01_qrt	80	26	85.28	264.52	0.677605
01_qrt	80	26	137.24	255.98	0.463864
01_qrt	80	26	106.99	278.29	0.615545
01_qrt	80	26	85.39	277.04	0.691777
01_qrt	80	26	68.88	231.49	0.702449
01_qrt	80	26	82.29	239.41	0.65628
01_qrt	80	26	58.09	203.62	0.714763
01_qrt	80	26	103.17	381.18	0.72934
01_qrt	80	26	107.81	343.55	0.686217
01_qrt	80	26	71.52	353.15	0.79748
01_qrt	80	26	100.61	296.91	0.661143
01_qrt	80	26	270.1	423.75	0.362596
01_qrt	80	26	110.73	360.94	0.693245
01_qrt	80	26	155.47	354.73	0.561723
01_qrt	80	26	125.14	504.28	0.751844
01_qrt	80	26	103.43	298.02	0.652943
01_qrt	80	26	112.98	212.98	0.469528
01_qrt	80	26	107.18	391.29	0.726086
01_qrt	80	26	270.23	495.81	0.454973
01_qrt	80	26	87.88	346.26	0.746202
01_qrt	80	26	236.49	572.71	0.587068
01_qrt	80	26	102.45	344.51	0.702592
01_qrt	80	26	132.05	541.47	0.756145
01_qrt	80	26	116.7	552.48	0.788771
01_qrt	80	26	160.23	563.2	0.715501
01_qrt	80	26	109.26	506.49	0.78428
01_qrt	80	26	140.94	631.8	0.776907
01_qrt	80	26	142.51	647.37	0.779879
01_qrt	80	26	162.91	591.35	0.724512
01_qrt	80	26	148.3	605.49	0.755074
01_qrt	80	26	156.12	525.68	0.703013
01_qrt	150	8	96.96	512.19	0.810695
01_qrt	150	8	94.63	464.8	0.796407
01_qrt	150	8	137.63	632.7	0.782472
01_qrt	150	8	227.48	937.36	0.757318
01_qrt	150	8	177.84	810.6	0.780607
01_qrt	150	8	189.86	862.79	0.779946
01_qrt	150	8	271.45	1150.47	0.764053
01_qrt	150	8	261.39	1143.3	0.771372
01_qrt	150	8	172.04	820.7	0.790374
01_qrt	150	8	178.41	868.69	0.794622
01_qrt	150	8	212.31	947.59	0.775947
01_qrt	150	8	173.5	758.99	0.771407
01_qrt	150	8	266.25	1175.44	0.773498
01_qrt	150	8	231.21	1025.01	0.774431
01_qrt	150	8	213.69	977.86	0.781472
01_qrt	150	8	252.47	1144.42	0.77939
01_qrt	150	8	166.45	771.79	0.784333
01_qrt	150	8	218.8	1004.16	0.782106
01_qrt	150	8	159.14	696.69	0.771577
01_qrt	150	8	188.85	886.81	0.787046
01_qrt	150	8	264.04	1171.43	0.7746
01_qrt	150	8	221.62	1017.74	0.782243
01_qrt	150	8	189.27	842.88	0.775448
01_qrt	150	8	176.09	781.08	0.774556
01_qrt	150	8	233.54	975.61	0.760632
01_qrt	150	8	270.2	1062.09	0.745596
01_qrt	150	8	202.28	884.67	0.771338
01_qrt	150	8	211.38	924.51	0.771371
01_qrt	150	8	264.8	1176.86	0.775003
01_qrt	150	8	201.61	941.18	0.78579
01_qrt	150	8	195.72	888.32	0.779674
01_qrt	150	8	221.2	982.9	0.774952
01_qrt	150	8	224.36	895.43	0.749439
01_qrt	150	8	271.11	1028.23	0.736333
01_qrt	150	8	276.88	1165.83	0.762504
01_qrt	150	8	178.4	808.29	0.779287
01_qrt	150	8	375.69	1627.72	0.769192
01_qrt	150	8	362.06	1373.84	0.736461
01_qrt	150	8	219.17	990.27	0.778687
01_qrt	150	8	263.56	1085.92	0.757293
01_qrt	150	8	233.3	1089.84	0.785932
01_qrt	150	8	317.2	1220.79	0.740176
01_qrt	150	8	225.42	1032.32	0.781637
01_qrt	150	8	186.91	850.02	0.780111
01_qrt	150	8	316.29	1241.11	0.745156
01_qrt	150	8	255.78	1086.63	0.764612
01_qrt	150	8	180.15	697.49	0.741717
01_qrt	150	8	299.39	1249.66	0.760431
01_qrt	150	8	265.61	1205.89	0.779748
01_qrt	150	8	253.51	1151.23	0.779792
01_qrt	150	8	229.62	1018.03	0.774447
01_qrt	150	8	295.64	1248.93	0.763285
01_qrt	150	8	339.55	1349.78	0.748433
01_qrt	150	8	286.44	1224.02	0.765984
01_qrt	150	8	258.34	1231.1	0.790155
01_qrt	150	8	313.22	1261.83	0.751773
01_qrt	150	8	212.62	917.83	0.768345
01_qrt	150	8	186.2	908.04	0.794943
01_qrt	150	8	324.21	1372.44	0.763771
01_qrt	150	8	314.6	1369.62	0.770301
01_qrt	150	8	234.66	1149.27	0.795818
01_qrt	150	8	227.48	1197.21	0.809992
01_qrt	150	8	188.8	955.4	0.802386
01_qrt	150	8	275.64	1304.49	0.788699
01_qrt	150	8	209.12	1080.63	0.806483
01_qrt	150	10	148.3	390.95	0.620693
01_qrt	150	10	149.55	452.28	0.669342
01_qrt	150	10	290.55	784	0.629413
01_qrt	150	10	398.95	565.95	0.295079
01_qrt	150	10	453.01	1091.81	0.585083
01_qrt	150	10	302.62	864.22	0.649823
01_qrt	150	10	301.1	710.11	0.575981
01_qrt	150	10	344.4	884.82	0.610768
01_qrt	150	10	601.55	1111.41	0.458751
01_qrt	150	10	375.45	836.65	0.551234
01_qrt	150	10	336.35	1026.95	0.672477
01_qrt	150	10	356.93	862.46	0.586149
01_qrt	150	10	323.91	805.42	0.597837
01_qrt	150	10	389.69	1157.12	0.663233
01_qrt	150	10	433.32	886.27	0.511075
01_qrt	150	10	394.73	957.88	0.587902
01_qrt	150	10	475.89	1154.81	0.587906
01_qrt	150	10	322.44	1264.55	0.745016
01_qrt	150	10	323.59	1012.1	0.680279
01_qrt	150	10	413.89	807.75	0.487589
01_qrt	150	10	298.99	1021.45	0.707298
01_qrt	150	10	347.54	1151.47	0.698177
01_qrt	150	10	437.36	777.03	0.437139
01_qrt	150	10	401.01	1133.8	0.646313
01_qrt	150	10	320.01	765.58	0.582003
01_qrt	150	10	334.24	920.75	0.636992
01_qrt	150	10	566.6	1029.7	0.449743
01_qrt	150	10	225.9	957.7	0.764122
01_qrt	150	10	420.09	936.6	0.551473
01_qrt	150	10	580.89	1072.65	0.458453
01_qrt	150	10	387.2	1053.02	0.632296
01_qrt	150	10	430.83	902.06	0.522393
01_qrt	150	10	557.66	978.45	0.430058
01_qrt	150	10	427.82	926.65	0.538315
01_qrt	150	10	454.35	1106.62	0.589425
01_qrt	150	10	537.23	1223.94	0.561065
01_qrt	150	10	453.24	1232.17	0.632161
01_qrt	150	10	317.67	1052.5	0.698176
01_qrt	150	10	458.42	1099.16	0.582936
01_qrt	150	10	415.4	1490.53	0.721307
01_qrt	150	10	562.29	1125.94	0.500604
01_qrt	150	10	553.28	1160.68	0.523314
01_qrt	150	10	534.97	1414.53	0.621804
01_qrt	150	10	391.85	1128.74	0.652843
01_qrt	150	10	422.88	1041.51	0.593974
01_qrt	150	10	397.12	899.31	0.558406
01_qrt	150	10	492.65	1082.91	0.545068
01_qrt	150	10	343.75	1155.81	0.70259
01_qrt	150	10	370.33	817.1	0.546775
01_qrt	150	10	311.48	917.62	0.660557
01_qrt	150	10	314.73	1022.83	0.692295
01_qrt	150	10	489.53	1132.67	0.5678
01_qrt	150	10	337.82	1156.22	0.707824
01_qrt	150	10	376.31	1271.37	0.704012
01_qrt	150	10	506.86	1031.14	0.508447
01_qrt	150	10	384.02	1178.59	0.674161
01_qrt	150	10	571.55	1319.39	0.566807
01_qrt	150	10	645.12	1237.24	0.478581
01_qrt	150	10	338.68	1008.4	0.664141
01_qrt	150	10	402.17	1270.29	0.683395
01_qrt	150	10	220.17	1061.4	0.792576
01_qrt	150	10	461.04	954.84	0.517155
01_qrt	150	10	358.15	1180.84	0.696699
01_qrt	150	10	334.68	1175.44	0.715273
01_qrt	150	10	317.63	1369.79	0.768118
01_qrt	150	10	213.23	986.1	0.783764
01_qrt	150	10	322.28	1227.48	0.737446
01_qrt	150	10	305.7	1273.38	0.75993
01_qrt	150	12	434.25	507.24	0.143896
01_qrt	150	12	308.9	430.73	0.282822
01_qrt	150	12	423.25	494.84	0.144673
01_qrt	150	12	300	421	0.287411
01_qrt	150	12	308.91	390.24	0.20841
01_qrt	150	12	283.28	354.95	0.201916
01_qrt	150	12	353.79	484.74	0.270145
01_qrt	150	12	338.03	423.19	0.201233
01_qrt	150	12	277.79	656.55	0.57691
01_qrt	150	12	218.23	890.38	0.754902
01_qrt	150	12	287.88	701.84	0.589821
01_qrt	150	12	321.99	384.17	0.161829
01_qrt	150	12	189.97	521.33	0.635605
01_qrt	150	12	305.68	666.44	0.541324
01_qrt	150	12	347.52	739.87	0.530296
01_qrt	150	12	453.71	555.76	0.183622
01_qrt	150	12	493.93	996.99	0.504579
01_qrt	150	12	298.85	764.8	0.609244
01_qrt	150	12	359.76	885.14	0.593556
01_qrt	150	12	361.07	843.09	0.57173
01_qrt	150	12	313.13	818.73	0.617542
01_qrt	150	12	182.81	776.65	0.764617
01_qrt	150	12	335.22	731.07	0.541467
01_qrt	150	12	567.28	1073.38	0.471511
01_qrt	150	12	195.1	701.73	0.721973
01_qrt	150	12	293.28	796.19	0.631646
01_qrt	150	12	457.62	982.45	0.534215
01_qrt	150	12	215.09	867.66	0.752103
01_qrt	150	12	364.57	859.87	0.576029
01_qrt	150	12	283.12	691.3	0.590438
01_qrt	150	12	407.4	937.52	0.56546
01_qrt	150	12	348.79	791.92	0.559564
01_qrt	150	12	280.19	564.54	0.503667
01_qrt	150	12	449.08	1093.08	0.589161
01_qrt	150	12	346.33	759.44	0.543953
01_qrt	150	12	357.07	1013.35	0.647644
01_qrt	150	12	299.68	865.67	0.653817
01_qrt	150	12	243.63	761.29	0.679977
01_qrt	150	12	297.69	819.22	0.636618
01_qrt	150	12	250.38	848.67	0.704974
01_qrt	150	12	402.27	854.89	0.529448
01_qrt	150	12	222.77	840.31	0.734895
01_qrt	150	12	400.05	1066.8	0.625
01_qrt	150	12	202.96	702.4	0.711062
01_qrt	150	12	451.39	888.71	0.492084
01_qrt	150	12	823.63	1136.28	0.275143
01_qrt	150	12	495.17	986.5	0.498054
01_qrt	150	12	407.05	842.51	0.51686
01_qrt	150	12	507.41	980.23	0.482356
01_qrt	150	12	462.34	1198.23	0.614148
01_qrt	150	12	333.28	1014.84	0.671603
01_qrt	150	12	321.85	690.82	0.534104
01_qrt	150	12	462.52	890.86	0.480828
01_qrt	150	12	493.19	811.78	0.392459
01_qrt	150	12	467.99	1020.07	0.541218
01_qrt	150	12	419.89	1059.51	0.603694
01_qrt	150	12	472.22	1045.52	0.548349
01_qrt	150	12	353.07	863.88	0.591297
01_qrt	150	12	212.95	843.78	0.747624
01_qrt	150	12	317.82	890.47	0.643087
01_qrt	150	12	508.69	810.89	0.372677
01_qrt	150	12	532.44	1151.26	0.537515
01_qrt	150	12	253.29	803.22	0.684657
01_qrt	150	12	431.2	1126.27	0.617143
01_qrt	150	12	491.25	1302.05	0.62271
01_qrt	150	12	632.23	1008.08	0.372837
01_qrt	150	12	473.83	1042.39	0.545448
01_qrt	150	12	318.72	858.79	0.628862
01_qrt	150	12	446.69	943.88	0.526751
01_qrt	150	12	650.71	1115.77	0.416806
01_qrt	150	12	482.9	1112.28	0.565847
01_qrt	150	12	375.31	1057.79	0.645194
01_qrt	150	12	226.59	979.95	0.768774
01_qrt	150	12	507.45	1072.32	0.526774
01_qrt	150	12	295.81	1241.43	0.761718
01_qrt	150	12	387.97	1011.73	0.616528
01_qrt	150	12	413.15	1117.72	0.630364
01_qrt	150	12	287.4	1101.96	0.739201
01_qrt	150	12	328.4	1090.21	0.698774
01_qrt	150	15	127.25	186.28	0.316889
01_qrt	150	15	79.32	156.19	0.492157
01_qrt	150	15	124.73	191.65	0.349178
01_qrt	150	15	74.46	217.76	0.658064
01_qrt	150	15	85.09	290.36	0.706916
01_qrt	150	15	120.76	159.48	0.242789
01_qrt	150	15	179.97	208.1	0.135175
01_qrt	150	15	172.76	265.65	0.349671
01_qrt	150	15	161.75	242.11	0.331915
01_qrt	150	15	171.9	231.53	0.257548
01_qrt	150	15	178.48	273.54	0.347518
01_qrt	150	15	132.95	228.64	0.418562
01_qrt	150	15	114.99	280.07	0.589424
01_qrt	150	15	363	577.89	0.371853
01_qrt	150	15	87.47	363.23	0.759188
01_qrt	150	15	170.56	359	0.524903
01_qrt	150	15	76.8	140.58	0.453692
01_qrt	150	15	145.19	305.24	0.524342
01_qrt	150	15	184.94	322.84	0.427147
01_qrt	150	15	227.46	386.98	0.412218
01_qrt	150	15	256.49	367.37	0.301794
01_qrt	150	15	149.68	242.73	0.383348
01_qrt	150	15	252.63	323.95	0.220157
01_qrt	150	15	195.63	411.61	0.52472
01_qrt	150	15	229.35	307.04	0.253029
01_qrt	150	15	119.31	287.69	0.585318
01_qrt	150	15	233.63	512.89	0.544464
01_qrt	150	15	87.85	329.4	0.733273
01_qrt	150	15	159.93	378.45	0.577408
01_qrt	150	15	91.19	248.81	0.633495
01_qrt	150	15	92.83	233.87	0.60307
01_qrt	150	15	166.85	304.15	0.451422
01_qrt	150	15	241.88	441.61	0.452277
01_qrt	150	15	195.46	413.23	0.526995
01_qrt	150	15	287.52	439.06	0.345169
01_qrt	150	15	254.26	823.2	0.691132
01_qrt	150	15	91.26	449.26	0.796866
01_qrt	150	15	193.78	541.73	0.642276
01_qrt	150	15	149.82	555.51	0.730302
01_qrt	150	15	156.83	435.01	0.639503
01_qrt	150	15	182.56	464.64	0.607115
01_qrt	150	15	185.44	423.77	0.562404
01_qrt	150	15	255.67	532.64	0.520014
01_qrt	150	15	108.09	492.72	0.780626
01_qrt	150	15	154.44	320.95	0.518804
01_qrt	150	15	169.03	481.84	0.649199
01_qrt	150	15	205.82	478.37	0.569768
01_qrt	150	15	266.61	590.29	0.548341
01_qrt	150	15	252.68	487.54	0.481725
01_qrt	150	15	250.12	567.85	0.559532
01_qrt	150	15	120.53	457.61	0.73661
01_qrt	150	15	208.03	552.36	0.62338
01_qrt	150	15	119.89	528.33	0.773077
01_qrt	150	15	138.66	440.99	0.685571
01_qrt	150	15	169.03	520.16	0.675042
01_qrt	150	15	142.5	626.09	0.772413
01_qrt	150	15	153.85	637.94	0.758817
01_qrt	150	15	162.83	383.04	0.574901
01_qrt	150	15	166.65	602.87	0.723572
01_qrt	150	15	210.48	608.07	0.653856
01_qrt	150	15	306.89	661.25	0.535894
01_qrt	150	15	171.54	611.88	0.719651
01_qrt	150	15	221.77	493.61	0.550698
01_qrt	150	15	162.4	541.89	0.700308
01_qrt	150	15	209.04	493.11	0.576078
01_qrt	150	15	111.55	431.68	0.741591
01_qrt	150	15	213.89	489.29	0.562856
01_qrt	150	15	269.82	615.93	0.561931
01_qrt	150	15	194.28	464.74	0.581981
01_qrt	150	15	115.23	479.24	0.759578
01_qrt	150	15	177.23	628.12	0.717841
01_qrt	150	15	242.98	563.24	0.568603
01_qrt	150	15	164.42	452.77	0.636858
01_qrt	150	15	110.82	455.45	0.75668
01_qrt	150	15	221.58	533.28	0.584496
01_qrt	150	15	153.41	486.42	0.684614
01_qrt	150	15	239.23	550.28	0.565258
01_qrt	150	15	143.74	515.31	0.721061
01_qrt	150	15	147.97	618.9	0.760915
01_qrt	150	15	207.2	598.39	0.653738
01_qrt	150	15	163.16	587.24	0.722158
01_qrt	150	18	14.09	52.81	0.733384
01_qrt	150	18	70.95	66.04	-0.0745003
01_qrt	150	18	16.91	69.23	0.755742
01_qrt	150	18	29	73.78	0.60694
01_qrt	150	18	72.62	94.68	0.232995
01_qrt	150	18	22.1	39.49	0.440365
01_qrt	150	18	26.46	51.49	0.48592
01_qrt	150	18	51.96	67.58	0.231133
01_qrt	150	18	45.3	47.37	0.0436985
01_qrt	150	18	53.8	56.3	0.044405
01_qrt	150	18	46.62	87.88	0.469504
01_qrt	150	18	29.46	93.58	0.685189
01_qrt	150	18	19.83	63.26	0.686532
01_qrt	150	18	52.95	56.6	0.0644876
01_qrt	150	18	24.4	63.95	0.618452
01_qrt	150	18	20.97	92.12	0.772362
01_qrt	150	18	67.87	74.27	0.0863067
01_qrt	150	18	49.06	57.15	0.141382
01_qrt	150	18	57.64	93.45	0.3832
01_qrt	150	18	23.51	52.28	0.550306
01_qrt	150	18	52.25	105.55	0.504879
01_qrt	150	18	23.17	55.43	0.581995
01_qrt	150	18	61.14	65.58	0.0677036
01_qrt	150	18	32.02	88.75	0.639211
01_qrt	150	18	49.51	88.89	0.443019
01_qrt	150	18	89.78	150.19	0.402157
01_qrt	150	18	53	113.53	0.533163
01_qrt	150	18	87.07	116.06	0.249785
01_qrt	150	18	49.89	84.35	0.408536
01_qrt	150	18	29.03	62.5	0.53552
01_qrt	150	18	85.83	124.43	0.310215
01_qrt	150	18	42.99	133.57	0.678146
01_qrt	150	18	79.78	84.27	0.0532811
01_qrt	150	18	45.36	102.09	0.555588
01_qrt	150	18	52.89	104.94	0.495998
01_qrt	150	18	46.73	195.48	0.760896
01_qrt	150	18	38.26	126.27	0.696998
01_qrt	150	18	39.46	100.84	0.608687
01_qrt	150	18	55.26	142.54	0.612249
01_qrt	150	18	122.81	251.25	0.511164
01_qrt	150	18	62.79	112.99	0.444287
01_qrt	150	18	63.26	123.47	0.487649
01_qrt	150	18	75.59	178.26	0.575956
01_qrt	150	18	61.14	145.92	0.580935
01_qrt	150	18	40.81	156.88	0.739865
01_qrt	150	18	126.17	374.38	0.662989
01_qrt	150	18	72.37	199.25	0.636738
01_qrt	150	18	70.44	227.2	0.690009
01_qrt	150	18	59.89	157.41	0.619529
01_qrt	150	18	60.92	240.14	0.746315
01_qrt	150	18	96.13	190.77	0.496095
01_qrt	150	18	58.45	158.67	0.631625
01_qrt	150	18	45.4	177.21	0.743863
01_qrt	150	18	97.54	260.7	0.625853
01_qrt	150	18	166.41	423.38	0.606949
01_qrt	150	18	122.57	349.94	0.649769
01_qrt	150	18	67.64	186.5	0.637319
01_qrt	150	18	83.69	227.98	0.632863
01_qrt	150	18	61.93	199.88	0.690164
01_qrt	150	18	72.72	278.99	0.73931
01_qrt	150	18	89.8	373.33	0.759462
01_qrt	150	18	107.73	314.36	0.657304
01_qrt	150	18	97.8	309.78	0.684292
01_qrt	150	18	91.23	347.02	0.737104
01_qrt	150	18	60.15	234.22	0.74319
01_qrt	150	18	75.64	282.88	0.732607
01_qrt	150	18	61.89	231.51	0.732668
01_qrt	150	18	72.78	278.58	0.738747
01_qrt	150	18	78.04	312.75	0.750472
01_qrt	150	18	73.66	281.89	0.738692
01_qrt	150	18	87.85	272.51	0.67759
01_qrt	150	18	81.43	315.39	0.741812
01_qrt	150	18	47.97	217.58	0.779529
01_qrt	150	18	105.61	461.5	0.771138
01_qrt	150	18	98.25	407.3	0.758777
01_qrt	150	18	100.8	446.96	0.774476
01_qrt	150	18	64.55	256.77	0.748608
01_qrt	150	18	68.08	306.11	0.777629
01_qrt	150	18	97.84	430.11	0.772547
01_qrt	150	18	88.78	319.06	0.721745
01_qrt	150	18	83.79	297.38	0.718206
01_qrt	150	18	94.1	236.34	0.601845
01_qrt	150	18	96.19	448.46	0.78551
01_qrt	150	18	96.01	282.57	0.660226
01_qrt	150	18	65.75	286.82	0.770762
01_qrt	150	19	28.97	75.01	0.613785
01_qrt	150	19	63.62	113.05	0.43724
01_qrt	150	19	40.04	102.11	0.607972
01_qrt	150	19	106.67	172.8	0.382697
01_qrt	150	19	23.32	100.07	0.766863
01_qrt	150	19	37.18	101.62	0.634127
01_qrt	150	19	29.48	101.82	0.710469
01_qrt	150	19	45.7	100.28	0.544276
01_qrt	150	19	54.2	246.12	0.779782
01_qrt	150	19	28.03	80.72	0.65275
01_qrt	150	19	39.35	109.85	0.641784
01_qrt	150	19	69.28	134.55	0.485098
01_qrt	150	19	39.08	123.51	0.683507
01_qrt	150	19	62.15	109.48	0.432316
01_qrt	150	19	55.88	181.93	0.692849
01_qrt	150	19	53.06	246.38	0.784642
01_qrt	150	19	63.55	138.26	0.540286
01_qrt	150	19	86.56	194.42	0.554778
01_qrt	150	19	92.52	210.16	0.559812
01_qrt	150	19	79.76	137.98	0.421945
01_qrt	150	19	78.67	194	0.594485
01_qrt	150	19	52.41	214.75	0.755949
01_qrt	150	19	70.34	207.29	0.660669
01_qrt	150	19	86.54	249.25	0.652798
01_qrt	150	19	84.67	220.07	0.615259
01_qrt	150	19	67.07	202.64	0.669019
01_qrt	150	19	61.16	198.58	0.692013
01_qrt	150	19	154.23	406.29	0.620394
01_qrt	150	19	79.8	235.54	0.661162
01_qrt	150	19	50.04	213.31	0.765412
01_qrt	150	19	78.18	325.04	0.759476
01_qrt	150	19	100.58	291.29	0.654708
01_qrt	150	19	92.05	277.44	0.668253
01_qrt	150	19	173.77	424.49	0.590662
01_qrt	150	19	140.12	375.65	0.626993
01_qrt	150	19	67.27	250.13	0.73102
01_qrt	150	19	64.72	300.07	0.784317
01_qrt	150	19	96.78	388.05	0.750599
01_qrt	150	19	72.02	289.75	0.751406
01_qrt	150	19	88.39	313.3	0.717874
01_qrt	150	19	77.19	317.9	0.757188
01_qrt	150	19	94.13	366.7	0.743278
01_qrt	150	19	92.92	309.63	0.6999
01_qrt	150	19	114.99	438.39	0.737699
01_qrt	150	19	83.86	345.86	0.757503
01_qrt	150	19	80.32	324.14	0.752206
01_qrt	150	19	108.45	259.18	0.581526
01_qrt	150	19	72.3	293.09	0.753352
01_qrt	150	19	87.9	356.06	0.753131
01_qrt	150	19	96.9	345.28	0.719358
01_qrt	150	19	95.77	380.1	0.74804
01_qrt	150	19	68.64	286.28	0.760235
01_qrt	150	19	76.35	270.36	0.717599
01_qrt	150	19	128.59	562.21	0.771278
01_qrt	150	19	128.07	562.99	0.772518
01_qrt	150	19	106.33	292.91	0.636953
01_qrt	150	19	105.09	434.8	0.758303
01_qrt	150	19	128.89	562.07	0.770687
01_qrt	150	19	88.24	408.48	0.78398
01_qrt	150	19	87.58	356.49	0.754327
01_qrt	150	19	123.23	570.09	0.783841
02_rsh1	10	8	413.61	1390.66	0.702573
02_rsh1	10	8	362.81	1246.43	0.708921
02_rsh1	10	8	413.78	1380.19	0.700193
02_rsh1	10	8	407.61	1396.97	0.708226
02_rsh1	10	8	276.89	1125.92	0.754077
02_rsh1	10	8	309.11	1349.59	0.770953
02_rsh1	10	8	316.15	1233.02	0.743597
02_rsh1	10	8	243.17	1071.04	0.772959
02_rsh1	10	8	278.44	1033.51	0.730588
02_rsh1	10	8	398.68	1245.37	0.67987
02_rsh1	10	8	377.38	1178.4	0.679752
02_rsh1	10	8	317.68	1279.54	0.751731
02_rsh1	10	8	385.95	1404.54	0.725213
02_rsh1	10	8	316.57	1175.2	0.730625
02_rsh1	10	8	251.27	1086.72	0.768781
02_rsh1	10	8	277.69	1342.09	0.793091
02_rsh1	10	8	308.53	1042.34	0.704003
02_rsh1	10	8	408.17	1314.68	0.689521
02_rsh1	10	8	299.96	1173.92	0.74448
02_rsh1	10	8	246.93	1099.2	0.775355
02_rsh1	10	8	251.45	1072.36	0.765517
02_rsh1	10	8	208.19	1082.27	0.807636
02_rsh1	10	8	312.6	1148.75	0.727878
02_rsh1	10	8	332.37	1257.15	0.735616
02_rsh1	10	8	345.88	1231.78	0.719203
02_rsh1	10	8	325.58	1118.86	0.708998
02_rsh1	10	8	307.31	1056.31	0.709082
02_rsh1	10	8	222.5	1080.34	0.794037
02_rsh1	10	8	292.08	1289.11	0.773417
02_rsh1	10	8	249.97	1009.21	0.752311
02_rsh1	10	8	297	1297.74	0.771141
02_rsh1	10	8	309.87	1295.05	0.76072
02_rsh1	10	8	255.71	1109.04	0.769422
02_rsh1	10	8	360	1256.76	0.713549
02_rsh1	10	8	375.08	1227.48	0.694431
02_rsh1	10	8	310.86	1339.49	0.767919
02_rsh1	10	8	351.55	1298.36	0.729235
02_rsh1	10	8	360.71	1125.9	0.679634
02_rsh1	10	8	293.03	1058.31	0.723115
02_rsh1	10	8	361.31	1219.5	0.703723
02_rsh1	10	8	329.76	1151.81	0.713703
02_rsh1	10	8	341.26	1310.68	0.739639
02_rsh1	10	8	399.56	1257.7	0.682309
02_rsh1	10	8	288.65	1147.89	0.748539
02_rsh1	10	8	341.31	1340.67	0.745418
02_rsh1	10	8	266.68	1099.38	0.757418
02_rsh1	10	8	328.73	1294.79	0.746113
02_rsh1	10	8	264.36	1266.56	0.791285
02_rsh1	10	8	339.27	1344.91	0.747738
02_rsh1	10	8	424.47	1288.61	0.670599
02_rsh1	10	8	368.04	1183.3	0.688972
02_rsh1	10	8	291.34	1099.97	0.735138
02_rsh1	10	8	325.93	1298	0.748906
02_rsh1	10	8	304.5	1219.66	0.75034
02_rsh1	10	8	350.5	1234.24	0.71602
02_rsh1	10	8	266.53	1189.41	0.775914
02_rsh1	10	8	256.54	1147.87	0.776508
02_rsh1	10	8	315.38	1126.12	0.719941
02_rsh1	10	8	337.51	1351.36	0.750244
02_rsh1	10	8	348.86	1345.97	0.740811
02_rsh1	10	8	395.12	1487.25	0.734328
02_rsh1	10	8	369.27	1387.4	0.73384
02_rsh1	10	8	325.55	1346.61	0.758245
02_rsh1	10	8	217.15	1009.75	0.784947
02_rsh1	10	10	327.69	1270.93	0.742165
02_rsh1	10	10	351.82	1206.74	0.708454
02_rsh1	10	10	121.68	497.34	0.755338
02_rsh1	10	10	457.41	1362.17	0.664205
02_rsh1	10	10	303.5	1117.55	0.728433
02_rsh1	10	10	434.54	1291.07	0.663426
02_rsh1	10	10	421.9	1311.07	0.678202
02_rsh1	10	10	407.07	1221.92	0.66686
02_rsh1	10	10	324.23	1214.02	0.732937
02_rsh1	10	10	388.21	1185.14	0.672435
02_rsh1	10	10	419	1195.87	0.649627
02_rsh1	10	10	340.69	1069.95	0.681583
02_rsh1	10	10	406.37	1157.73	0.649003
02_rsh1	10	10	301.23	1050.24	0.71318
02_rsh1	10	10	299.64	1135.86	0.7362
02_rsh1	10	10	440.49	1294.62	0.659753
02_rsh1	10	10	352.85	1248.43	0.717365
02_rsh1	10	10	140.95	524.84	0.731442
02_rsh1	10	10	342.56	1137.54	0.69885
02_rsh1	10	10	343.97	1164.71	0.704673
02_rsh1	10	10	349.72	1196.88	0.707799
02_rsh1	10	10	385.96	1182.94	0.673737
02_rsh1	10	10	297.75	1130.29	0.736572
02_rsh1	10	10	416.31	1137.1	0.633884
02_rsh1	10	10	227.24	1081.24	0.789834
02_rsh1	10	10	365.04	1170.8	0.688213
02_rsh1	10	10	357.92	1151.86	0.689268
02_rsh1	10	10	287.95	1021.15	0.718004
02_rsh1	10	10	375.12	1073.9	0.650694
02_rsh1	10	10	285.85	1116.51	0.743979
02_rsh1	10	10	366.07	1160.02	0.684428
02_rsh1	10	10	327.66	1218.47	0.731097
02_rsh1	10	10	325.04	1010.99	0.678493
02_rsh1	10	10	286.71	1054.29	0.728054
02_rsh1	10	10	368.45	1213.68	0.696419
02_rsh1	10	10	416.76	1173.31	0.6448
02_rsh1	10	10	409.5	1049.51	0.609818
02_rsh1	10	10	370.74	1097.29	0.662131
02_rsh1	10	10	301	1054.61	0.714596
02_rsh1	10	10	426.74	1141.24	0.626073
02_rsh1	10	10	424.42	1330.16	0.680926
02_rsh1	10	10	389.5	1300.64	0.70054
02_rsh1	10	10	300.91	1020.63	0.705172
02_rsh1	10	10	256.35	941.31	0.727667
02_rsh1	10	10	333.87	1113.95	0.700283
02_rsh1	10	10	307.61	1156.36	0.733984
02_rsh1	10	10	404.13	1275.35	0.683122
02_rsh1	10	10	428.08	1291.06	0.668427
02_rsh1	10	10	403.76	1097.57	0.632142
02_rsh1	10	10	406.12	1150.97	0.64715
02_rsh1	10	10	320.82	1167.89	0.725299
02_rsh1	10	10	286.44	1048.21	0.726734
02_rsh1	10	10	379.09	1337.48	0.716564
02_rsh1	10	10	345.4	1184.04	0.708287
02_rsh1	10	10	388.93	1126.27	0.654674
02_rsh1	10	10	430.29	1242.07	0.65357
02_rsh1	10	10	391.04	1147.96	0.65937
02_rsh1	10	10	324.59	1286.59	0.747713
02_rsh1	10	10	404.71	1323.43	0.694204
02_rsh1	10	10	276.84	1039.1	0.733577
02_rsh1	10	10	406.01	1384.81	0.706812
02_rsh1	10	10	272.9	1135.01	0.759562
02_rsh1	10	10	274.3	1089.15	0.748152
02_rsh1	10	10	331.41	1225.59	0.729591
02_rsh1	10	10	132.2	583.84	0.773568
02_rsh1	10	10	461.39	1307.07	0.647004
02_rsh1	10	10	121.53	546.33	0.777552
02_rsh1	10	10	308.73	1266.43	0.75622
02_rsh1	10	10	370.28	1159.73	0.680719
02_rsh1	10	10	128.25	630.55	0.796606
02_rsh1	10	10	100.69	439.2	0.770742
02_rsh1	10	10	99.62	476.12	0.790746
02_rsh1	10	12	349.2	1090.63	0.679827
02_rsh1	10	12	285.33	1106.24	0.742063
02_rsh1	10	12	123.71	420.65	0.705908
02_rsh1	10	12	412.11	1280.82	0.678245
02_rsh1	10	12	363.06	1137.28	0.680765
02_rsh1	10	12	402.93	1137.72	0.645844
02_rsh1	10	12	270.94	994.55	0.727585
02_rsh1	10	12	251.4	1005.44	0.74996
02_rsh1	10	12	286.19	1073.87	0.733497
02_rsh1	10	12	116.41	394.91	0.705224
02_rsh1	10	12	342.33	1147.42	0.701652
02_rsh1	10	12	452.62	1119.38	0.595651
02_rsh1	10	12	328.35	1233.11	0.733722
02_rsh1	10	12	321.59	989.5	0.674987
02_rsh1	10	12	402.82	962.65	0.581551
02_rsh1	10	12	411.49	982.24	0.58107
02_rsh1	10	12	290.54	963.21	0.698363
02_rsh1	10	12	264.36	1038.23	0.745365
02_rsh1	10	12	126.19	427.67	0.704959
02_rsh1	10	12	431.38	1098.22	0.607192
02_rsh1	10	12	395.35	1087.12	0.636333
02_rsh1	10	12	362.02	938.1	0.614092
02_rsh1	10	12	624.94	966.74	0.353559
02_rsh1	10	12	309.49	1049.74	0.705165
02_rsh1	10	12	358.94	1228.18	0.707755
02_rsh1	10	12	284.42	1114.09	0.744706
02_rsh1	10	12	500.95	1080.54	0.536398
02_rsh1	10	12	354.39	1067.75	0.668096
02_rsh1	10	12	137.48	598.07	0.770111
02_rsh1	10	12	301.52	969.02	0.68884
02_rsh1	10	12	467.52	1042.47	0.551527
02_rsh1	10	12	274.36	908.58	0.698034
02_rsh1	10	12	500.04	1079.98	0.537001
02_rsh1	10	12	278.3	995.4	0.720414
02_rsh1	10	12	224.43	651.71	0.655629
02_rsh1	10	12	270.61	669.95	0.596074
02_rsh1	10	12	123.94	408.94	0.696924
02_rsh1	10	12	326.14	999.95	0.673844
02_rsh1	10	12	391.05	992.74	0.60608
02_rsh1	10	12	328.32	1085.81	0.697617
02_rsh1	10	12	203.08	465.78	0.563979
02_rsh1	10	12	545.04	1107.04	0.50766
02_rsh1	10	12	475.31	1038.83	0.542466
02_rsh1	10	12	297.29	1090.07	0.727274
02_rsh1	10	12	122.6	392.18	0.687388
02_rsh1	10	12	265.18	1003.83	0.735832
02_rsh1	10	12	436.7	1196.75	0.635095
02_rsh1	10	12	341.01	1080.37	0.684349
02_rsh1	10	12	530.99	963.98	0.449169
02_rsh1	10	12	331.45	1248.98	0.734623
02_rsh1	10	12	300.9	905.54	0.667712
02_rsh1	10	12	353.45	1234.93	0.713789
02_rsh1	10	12	433.47	1021.94	0.575836
02_rsh1	10	12	358.6	1008.31	0.644355
02_rsh1	10	12	366.87	1210.72	0.696982
02_rsh1	10	12	375.68	973.62	0.614141
02_rsh1	10	12	318.72	1111.01	0.713117
02_rsh1	10	12	148.16	394.33	0.624274
02_rsh1	10	12	270.55	1061.08	0.745024
02_rsh1	10	12	308.39	942.02	0.672629
02_rsh1	10	12	380.81	1098.38	0.653289
02_rsh1	10	12	333.82	1100.09	0.696543
02_rsh1	10	12	347.57	1172.85	0.703653
02_rsh1	10	12	391.55	1183.87	0.669263
02_rsh1	10	12	453.85	1110.66	0.591369
02_rsh1	10	12	292.93	1141.54	0.743391
02_rsh1	10	12	356.28	1153.37	0.691088
02_rsh1	10	12	259.16	962.53	0.730751
02_rsh1	10	12	343.79	995.47	0.654646
02_rsh1	10	12	375.58	1349.93	0.721771
02_rsh1	10	12	370.71	1062.52	0.651103
02_rsh1	10	12	287.6	1113.06	0.741613
02_rsh1	10	12	381.59	1247.74	0.694167
02_rsh1	10	12	366.31	1110.64	0.670181
02_rsh1	10	12	220.31	517.48	0.574244
02_rsh1	10	12	243.05	585.29	0.584736
02_rsh1	10	12	84.44	346.87	0.756566
02_rsh1	10	12	149.5	484.21	0.69125
02_rsh1	10	12	87.46	362.57	0.758778
02_rsh1	10	12	68.45	327.13	0.790756
02_rsh1	10	12	97.71	449.86	0.782777
02_rsh1	10	15	51.14	128.15	0.601014
02_rsh1	10	15	61.83	148.16	0.582681
02_rsh1	10	15	62.03	153.3	0.595369
02_rsh1	10	15	70.83	141.77	0.500388
02_rsh1	10	15	65.48	149.68	0.562533
02_rsh1	10	15	165.2	221.5	0.254176
02_rsh1	10	15	99.52	240.79	0.586694
02_rsh1	10	15	619.02	799.7	0.225935
02_rsh1	10	15	64.94	169.95	0.617946
02_rsh1	10	15	314.65	1029.54	0.694378
02_rsh1	10	15	437.42	974.55	0.551167
02_rsh1	10	15	339.67	936.8	0.637415
02_rsh1	10	15	66.6	182.86	0.635787
02_rsh1	10	15	506.06	908.76	0.443131
02_rsh1	10	15	291.74	471.02	0.3806
02_rsh1	10	15	311.31	948.89	0.671922
02_rsh1	10	15	318.35	695.52	0.542285
02_rsh1	10	15	70.58	216.12	0.673422
02_rsh1	10	15	353.48	888.33	0.602096
02_rsh1	10	15	370.72	1011.11	0.633344
02_rsh1	10	15	558.75	863.51	0.352943
02_rsh1	10	15	442.43	696.51	0.36479
02_rsh1	10	15	485.97	795.88	0.389393
02_rsh1	10	15	71.88	167.86	0.571786
02_rsh1	10	15	263.33	765.09	0.655805
02_rsh1	10	15	120.24	247.94	0.515044
02_rsh1	10	15	63.82	150.99	0.577323
02_rsh1	10	15	34.5	149	0.768456
02_rsh1	10	15	29.99	136.29	0.780028
02_rsh1	10	15	67.36	247.51	0.727849
02_rsh1	10	15	330.51	1052.32	0.685932
02_rsh1	10	15	69.54	144.77	0.519652
02_rsh1	10	15	119.08	238.16	0.5
02_rsh1	10	15	52.78	162.25	0.6747
02_rsh1	10	15	86.34	206.52	0.581929
02_rsh1	10	15	259.52	816.42	0.682124
02_rsh1	10	15	321.56	895.24	0.640811
02_rsh1	10	15	288.47	1033.59	0.720905
02_rsh1	10	15	293.07	941.78	0.688813
02_rsh1	10	15	608.3	838.72	0.274728
02_rsh1	10	15	215.49	322.03	0.330839
02_rsh1	10	15	338.89	873.91	0.612214
02_rsh1	10	15	34.03	164.15	0.792629
02_rsh1	10	15	444.9	846.81	0.474617
02_rsh1	10	15	96.03	199.73	0.519201
02_rsh1	10	15	70.05	167.16	0.58094
02_rsh1	10	15	52.99	173.5	0.694582
02_rsh1	10	15	458.28	851.58	0.461847
02_rsh1	10	15	502.18	794.03	0.367555
02_rsh1	10	15	103.3	217.19	0.524334
02_rsh1	10	15	649.91	875.95	0.258051
02_rsh1	10	15	224.28	793.99	0.717528
02_rsh1	10	15	307.94	916.49	0.664001
02_rsh1	10	15	64.21	164.99	0.610764
02_rsh1	10	15	334.78	1002.36	0.666008
02_rsh1	10	15	66.3	141.97	0.533
02_rsh1	10	15	84.32	158.04	0.466464
02_rsh1	10	15	100.57	199.87	0.496873
02_rsh1	10	15	517.81	859.69	0.397678
02_rsh1	10	15	158.79	255.18	0.377773
02_rsh1	10	15	341.9	896.42	0.618605
02_rsh1	10	15	328.63	913.94	0.640425
02_rsh1	10	15	223.01	732.52	0.695558
02_rsh1	10	15	50.96	136.44	0.626502
02_rsh1	10	15	324.84	798.22	0.593045
02_rsh1	10	15	86.12	196.19	0.561038
02_rsh1	10	15	84.84	164.79	0.485163
02_rsh1	10	15	315.88	661.42	0.522421
02_rsh1	10	15	332.43	1030.7	0.677472
02_rsh1	10	15	390.79	1051.27	0.628269
02_rsh1	10	15	588.11	825.46	0.287537
02_rsh1	10	15	523.98	820.95	0.361739
02_rsh1	10	15	98.49	204.13	0.517513
02_rsh1	10	15	357.55	759.8	0.529416
[truncated: 3,189 more rows]
