# Supplementary material for: A guanosine tetraphosphate (ppGpp) mediated brake on photosynthesis is required for acclimation to nitrogen limitation in Arabidopsis
Source: eLife journal article supplement (doi:10.7554/elife.75041), 2022-02-14
Supplement: fig3-data2 [file elife-75041-fig3-data2-v2.zip]

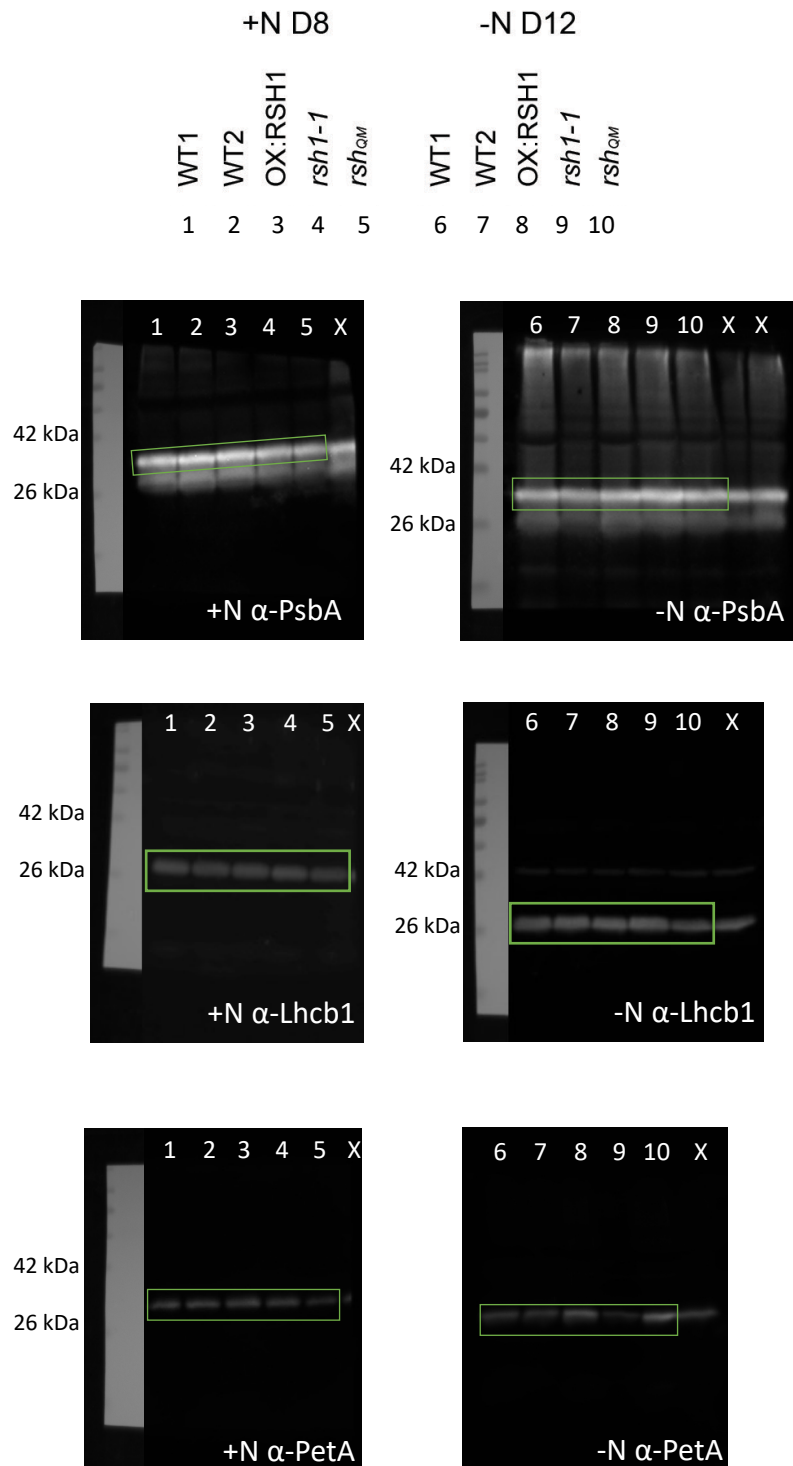

Figure 3B source data. Full sized immune blots.

NB : Immunoblot signal superimposed with photograph of marker lane taken at the same time. In some cases a photograph of the marker lane after transfer is also shown for clarity.

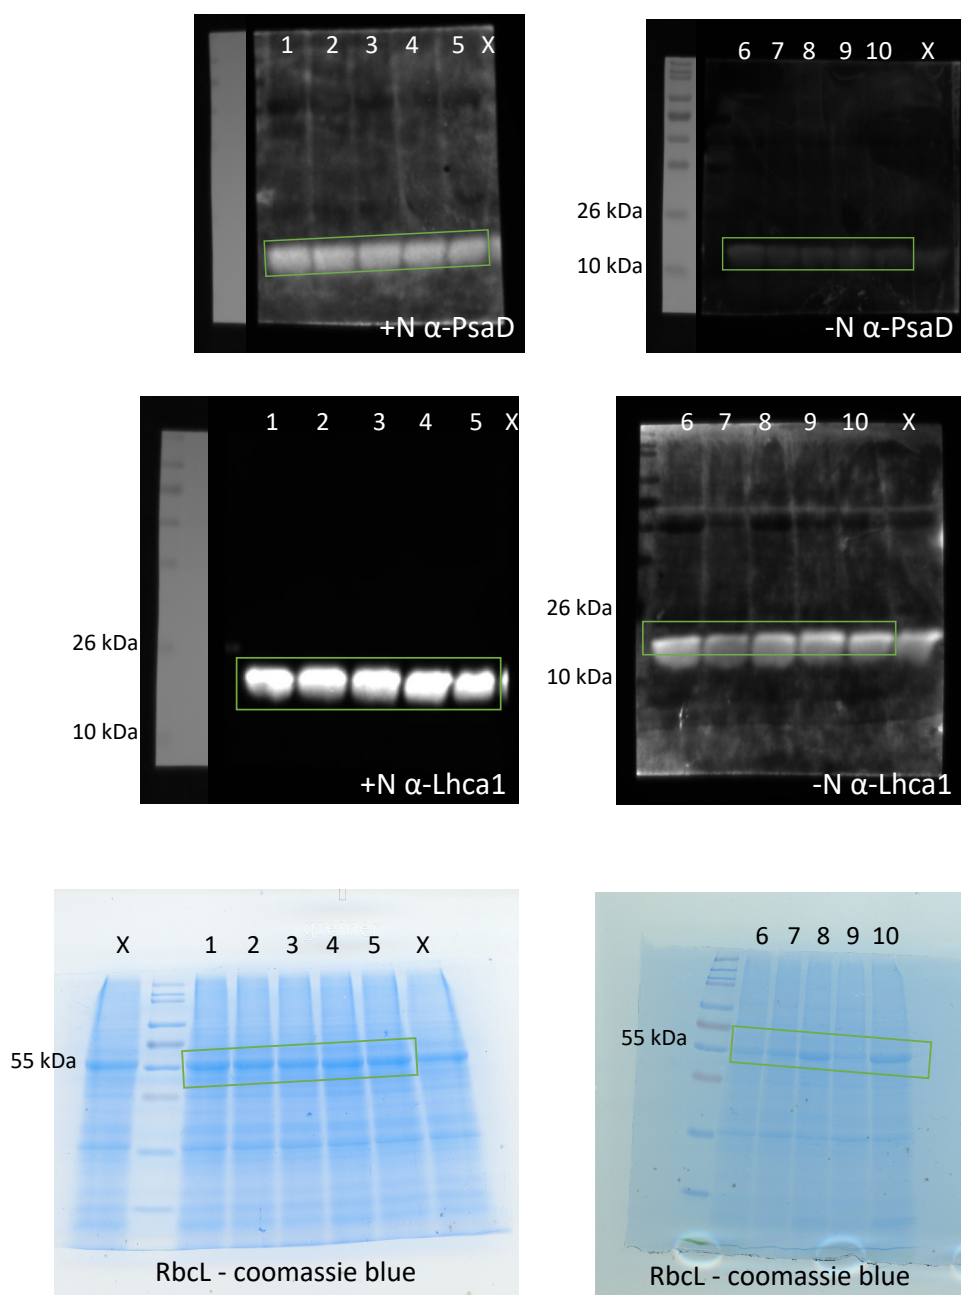

Figure 3B source data. Full sized immune blots.

NB : Immunoblot signal superimposed with photograph of marker lane taken at the same time. In some cases a photograph of the marker lane after transfer is also shown for clarity.
