# Supplementary material for: A guanosine tetraphosphate (ppGpp) mediated brake on photosynthesis is required for acclimation to nitrogen limitation in Arabidopsis
Source: eLife journal article supplement (doi:10.7554/elife.75041), 2022-02-14
Supplement: fig3-data3 [file Fig_3C_data.xlsx]

## Sheet: Data
Line	Chl a/b
1_WT1	2.42531
1_WT1	2.49182
1_WT1	2.60256
1_WT1	2.34452
3_rsh1-1	1.99447
3_rsh1-1	1.99585
3_rsh1-1	1.88757
3_rsh1-1	1.95153
4_QM	2.9107
4_QM	3.14425
4_QM	3.22005
4_QM	3.12768
2_OXRSH1	3.26931
2_OXRSH1	3.16886
2_OXRSH1	3.15391
2_OXRSH1	3.23536
