# Supplementary material for: A guanosine tetraphosphate (ppGpp) mediated brake on photosynthesis is required for acclimation to nitrogen limitation in Arabidopsis
Source: eLife journal article supplement (doi:10.7554/elife.75041), 2022-02-14
Supplement: fig4-data3 [file Fig_4B_data.xlsx]

## Sheet: Feuil1
Line	Treatment	Expression
RSH1	N	3239
RSH1	N	3451
RSH1	N	3406
RSH2	N	765
RSH2	N	780
RSH2	N	734
RSH3	N	2910
RSH3	N	2669
RSH3	N	3087
CRSH	N	422
CRSH	N	423
CRSH	N	426
RSH1	noN	1824
RSH1	noN	1559
RSH1	noN	1438
RSH2	noN	6167
RSH2	noN	6014
RSH2	noN	5877
RSH3	noN	15295
RSH3	noN	16012
RSH3	noN	16361
CRSH	noN	130
CRSH	noN	91
CRSH	noN	86
