# Supplementary material for: A guanosine tetraphosphate (ppGpp) mediated brake on photosynthesis is required for acclimation to nitrogen limitation in Arabidopsis
Source: eLife journal article supplement (doi:10.7554/elife.75041), 2022-02-14
Supplement: fig5-data3 [file Fig 5 extended figure -N complexes WT vs OXRSH1.pdf › Fig 5 source data 3/Fig 5 extended figure -N complexes WT vs OXRSH1.pdf]

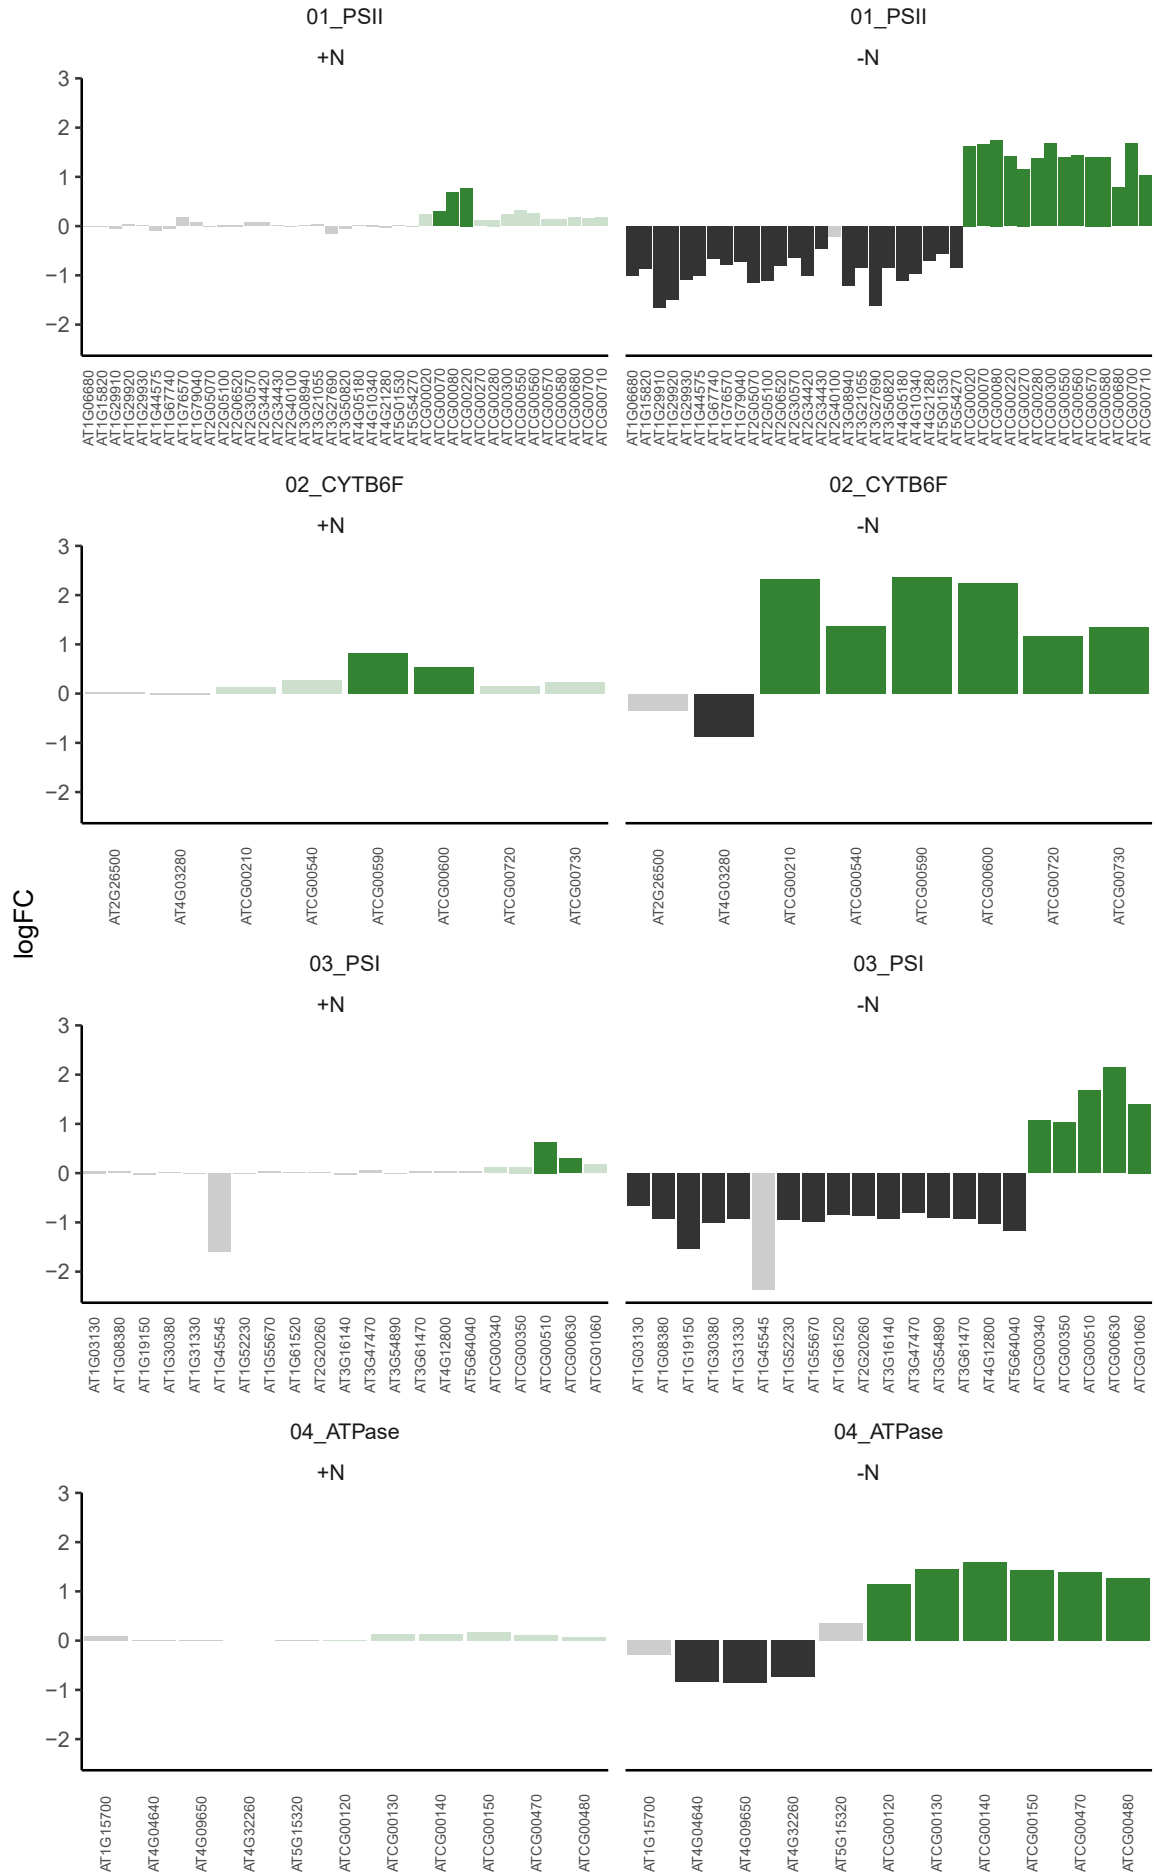

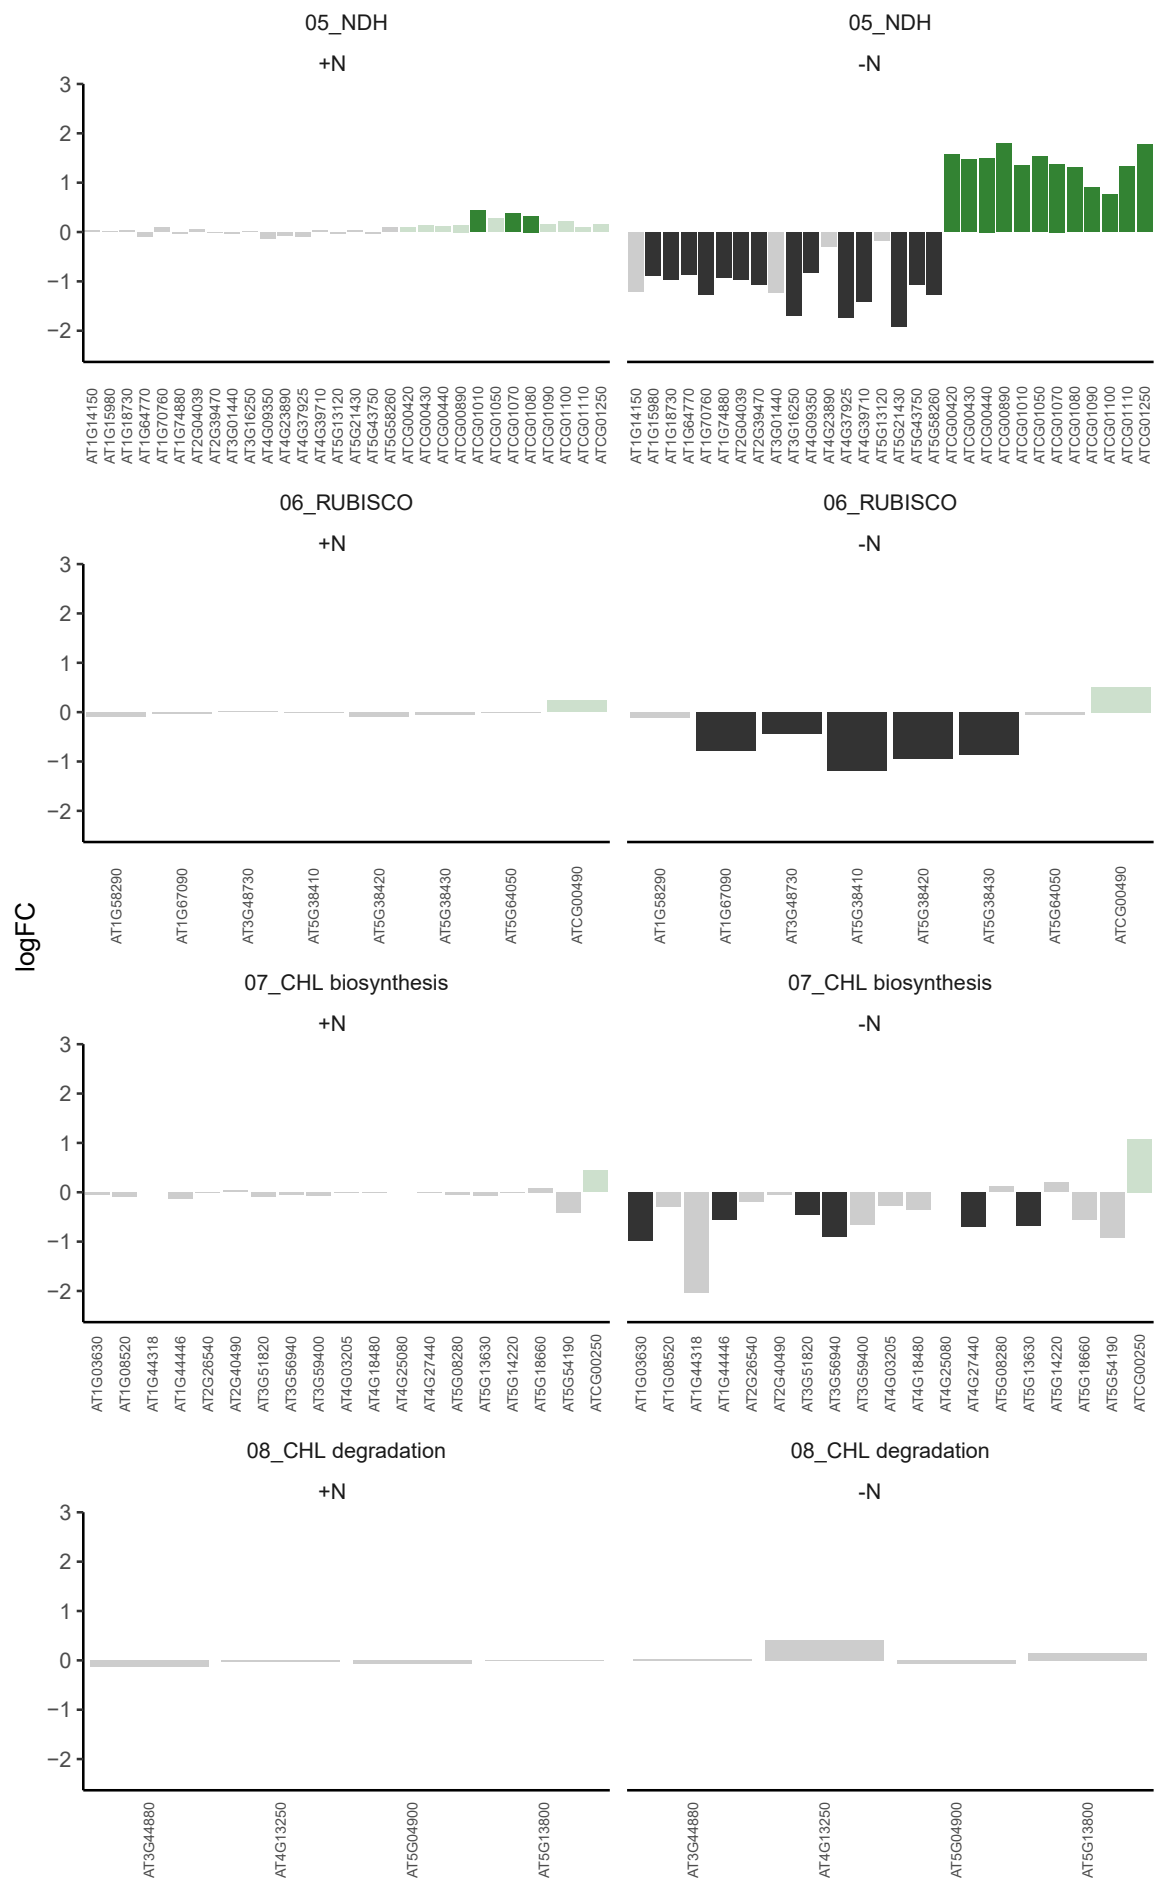

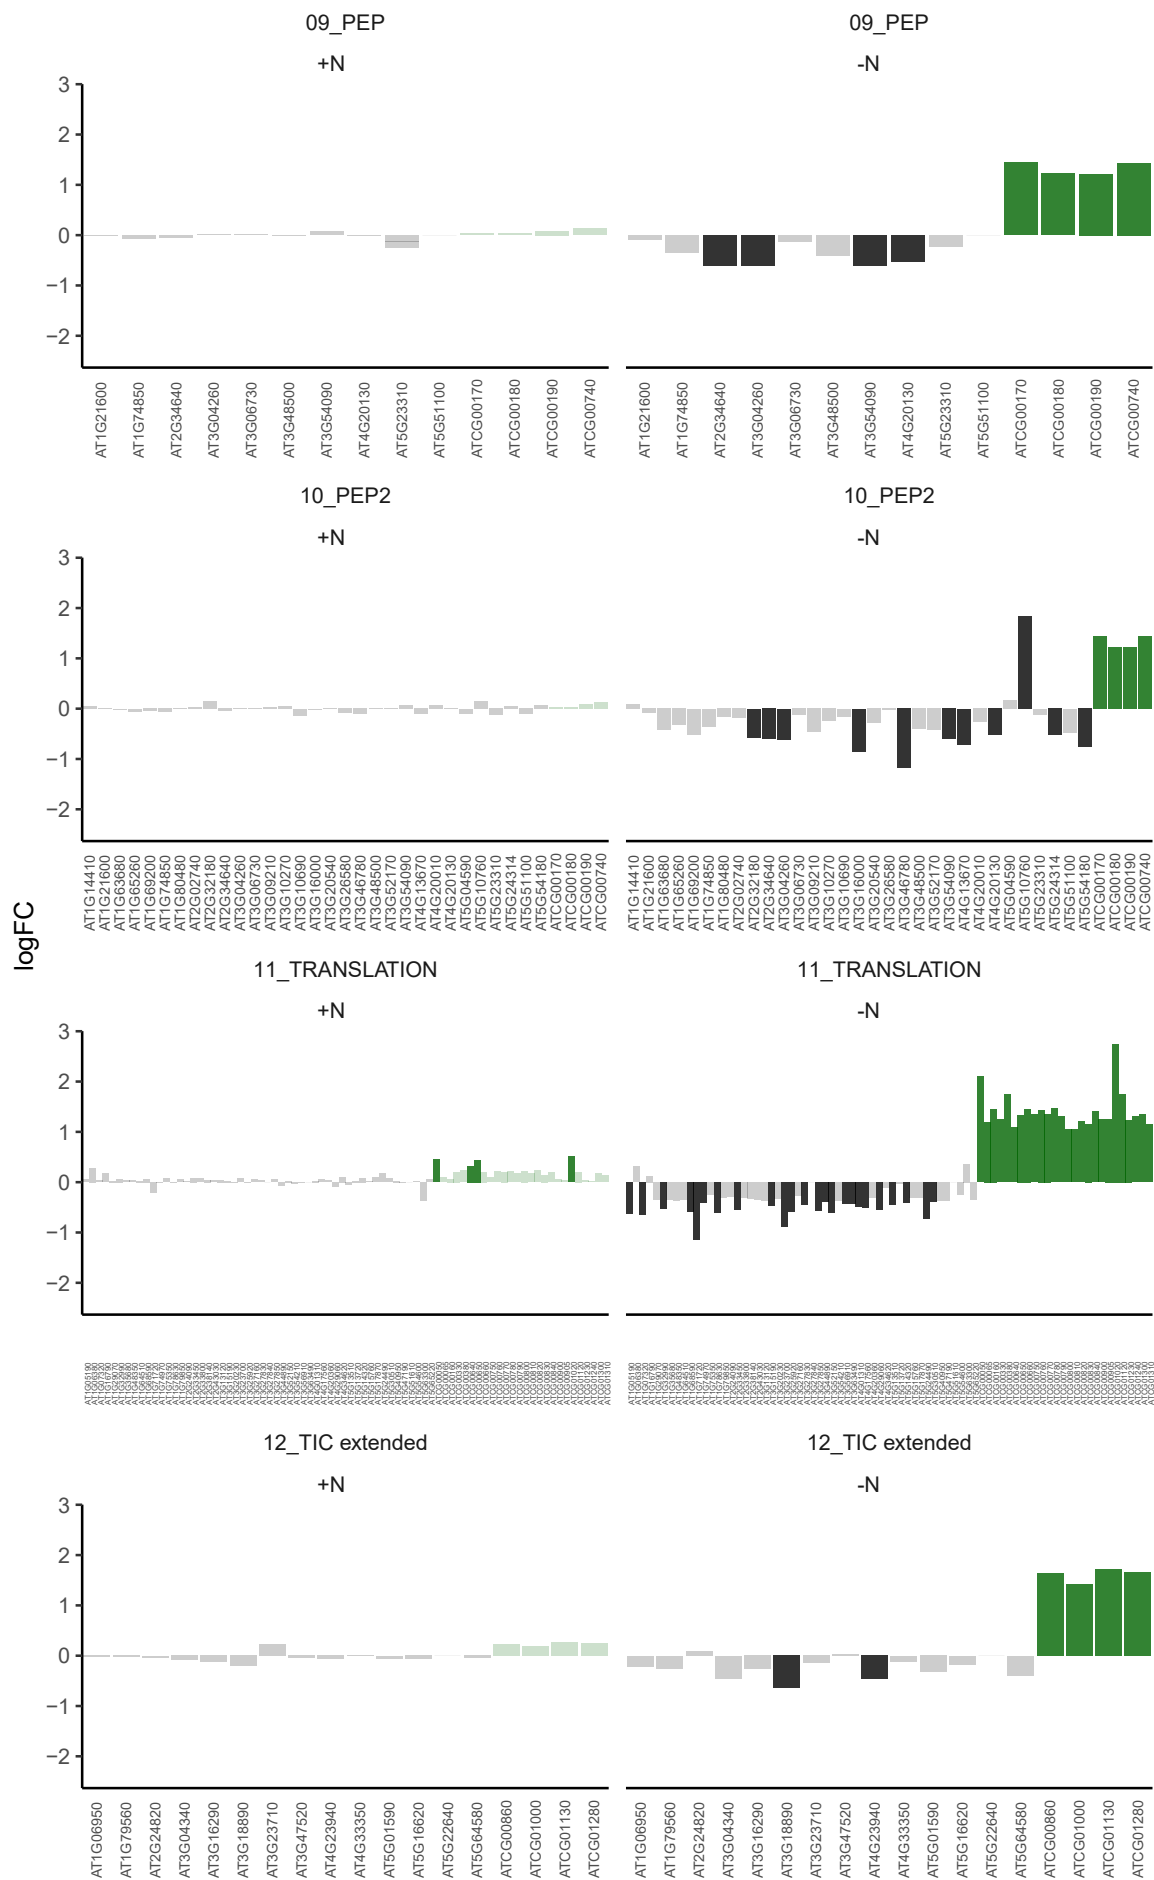

**Figure 5- Extended figure. Disrupted regulation of photosynthetic complexes in OX:RSH1 versus wild type.** Relative transcript levels under -N for OX:RSH1 versus wild type for nuclear (black) and chloroplast (green) genes encoding subunits of the indicated photosynthetic complexes. Solid colors indicate significantly different changes in expression, transparent colors indicate non-significant changes.
