# Supplementary material for: A guanosine tetraphosphate (ppGpp) mediated brake on photosynthesis is required for acclimation to nitrogen limitation in Arabidopsis
Source: eLife journal article supplement (doi:10.7554/elife.75041), 2022-02-14
Supplement: fig5-data3 [file Fig_5C_data.xlsx]

## Sheet: Sheet1
SUBUNIT	id1	id2	genome	complex	treatment	logFC	padj
PSBP	AT1G06680	AT1G06680.1	N	01_PSII	1_N	0.004	0.993226
LHCB6	AT1G15820	At1g15820.1	N	01_PSII	1_N	-0.002	0.995911
LHCB1.2	AT1G29910	At1g29910.1	N	01_PSII	1_N	-0.05	0.941113
LHCB1.1	AT1G29920	At1g29920.1	N	01_PSII	1_N	0.029	0.9762
LHCB1.3	AT1G29930	AT1G29930.1	N	01_PSII	1_N	0.014	0.984556
PSBS	AT1G44575	AT1G44575.2	N	01_PSII	1_N	-0.09	0.820953
PSBY	AT1G67740	AT1G67740.1	N	01_PSII	1_N	-0.048	0.926501
LHCB2.3	AT1G76570	AT1G76570.1	N	01_PSII	1_N	0.175	0.820953
PSBR	AT1G79040	AT1G79040.1	N	01_PSII	1_N	0.079	0.865834
LHCB2.2	AT2G05070	At2g05070.1	N	01_PSII	1_N	-0.01	0.987918
LHCB2.1	AT2G05100	At2g05100.1	N	01_PSII	1_N	0.021	0.978725
PSBX	AT2G06520	AT2G06520.1	N	01_PSII	1_N	0.023	0.977321
PSBW	AT2G30570	AT2G30570.1	N	01_PSII	1_N	0.077	0.865834
LHCB1.5	AT2G34420	At2g34420.1	N	01_PSII	1_N	0.071	0.907605
LHCB1.4	AT2G34430	At2g34430.1	N	01_PSII	1_N	0.005	0.991413
LHCB4.3	AT2G40100	AT2G40100.1	N	01_PSII	1_N	0.004	0.991413
LHCB4.2	AT3G08940	At3g08940.2	N	01_PSII	1_N	0.005	0.99113
PSBTN	AT3G21055	AT3G21055.1	N	01_PSII	1_N	0.035	0.952072
LHCB2.4	AT3G27690	At3g27690.2	N	01_PSII	1_N	-0.153	0.820953
PSBO	AT3G50820	AT3G50820.1	N	01_PSII	1_N	-0.054	0.919971
PSBQ-2	AT4G05180	At4g05180.1	N	01_PSII	1_N	0.007	0.989771
LHCB5	AT4G10340	At4g10340.1	N	01_PSII	1_N	0.024	0.978276
PSBQ-1	AT4G21280	At4g21280.1	N	01_PSII	1_N	-0.037	0.945278
LHCB4.1	AT5G01530	AT5G01530.1	N	01_PSII	1_N	0.013	0.982872
LHCB3	AT5G54270	At5g54270.1	N	01_PSII	1_N	0.001	0.998532
PSBA	ATCG00020	ATCG00020.1	C	01_PSII	1_N	0.243	0.769906
PSBK	ATCG00070	ATCG00070.1	C	01_PSII	1_N	0.289	0.0214173
PSBI	ATCG00080	ATCG00080.1	C	01_PSII	1_N	0.683	3.65796e-16
PSBM	ATCG00220	ATCG00220.1	C	01_PSII	1_N	0.775	2.6911e-15
PSBD	ATCG00270	ATCG00270.1	C	01_PSII	1_N	0.119	0.820953
PSBC	ATCG00280	ATCG00280.1	C	01_PSII	1_N	0.126	0.820953
PSBZ	ATCG00300	ATCG00300.1	C	01_PSII	1_N	0.23	0.124447
PSBJ	ATCG00550	ATCG00550.1	C	01_PSII	1_N	0.309	0.0870577
PSBL	ATCG00560	ATCG00560.1	C	01_PSII	1_N	0.257	0.145315
PSBF	ATCG00570	ATCG00570.1	C	01_PSII	1_N	0.132	0.778089
PSBE	ATCG00580	ATCG00580.1	C	01_PSII	1_N	0.141	0.778089
PSBB	ATCG00680	ATCG00680.1	C	01_PSII	1_N	0.171	0.780509
PSBN	ATCG00700	ATCG00700.1	C	01_PSII	1_N	0.157	0.525814
PSBH	ATCG00710	ATCG00710.1	C	01_PSII	1_N	0.175	0.616432
PSBP	AT1G06680	AT1G06680.1	N	01_PSII	2_no_N	-1.002	5.33215e-11
LHCB6	AT1G15820	At1g15820.1	N	01_PSII	2_no_N	-0.857	5.2312e-09
LHCB1.2	AT1G29910	At1g29910.1	N	01_PSII	2_no_N	-1.664	1.86888e-26
LHCB1.1	AT1G29920	At1g29920.1	N	01_PSII	2_no_N	-1.492	1.49548e-18
LHCB1.3	AT1G29930	AT1G29930.1	N	01_PSII	2_no_N	-1.096	3.35891e-09
PSBS	AT1G44575	AT1G44575.2	N	01_PSII	2_no_N	-1.001	1.25613e-11
PSBY	AT1G67740	AT1G67740.1	N	01_PSII	2_no_N	-0.652	1.46339e-05
LHCB2.3	AT1G76570	AT1G76570.1	N	01_PSII	2_no_N	-0.775	1.03883e-05
PSBR	AT1G79040	AT1G79040.1	N	01_PSII	2_no_N	-0.711	0.000902785
LHCB2.2	AT2G05070	At2g05070.1	N	01_PSII	2_no_N	-1.152	2.07883e-13
LHCB2.1	AT2G05100	At2g05100.1	N	01_PSII	2_no_N	-1.1	2.74683e-14
PSBX	AT2G06520	AT2G06520.1	N	01_PSII	2_no_N	-0.806	2.27258e-07
PSBW	AT2G30570	AT2G30570.1	N	01_PSII	2_no_N	-0.645	0.000525424
LHCB1.5	AT2G34420	At2g34420.1	N	01_PSII	2_no_N	-1.011	2.12095e-08
LHCB1.4	AT2G34430	At2g34430.1	N	01_PSII	2_no_N	-0.465	0.00766463
LHCB4.3	AT2G40100	AT2G40100.1	N	01_PSII	2_no_N	-0.22	0.354846
LHCB4.2	AT3G08940	At3g08940.2	N	01_PSII	2_no_N	-1.206	1.90017e-14
PSBTN	AT3G21055	AT3G21055.1	N	01_PSII	2_no_N	-0.838	0.000200078
LHCB2.4	AT3G27690	At3g27690.2	N	01_PSII	2_no_N	-1.614	0.00202387
PSBO	AT3G50820	AT3G50820.1	N	01_PSII	2_no_N	-0.843	5.98726e-07
PSBQ-2	AT4G05180	At4g05180.1	N	01_PSII	2_no_N	-1.107	2.81301e-11
LHCB5	AT4G10340	At4g10340.1	N	01_PSII	2_no_N	-0.974	5.51692e-09
PSBQ-1	AT4G21280	At4g21280.1	N	01_PSII	2_no_N	-0.703	3.80117e-05
LHCB4.1	AT5G01530	AT5G01530.1	N	01_PSII	2_no_N	-0.557	0.00147372
LHCB3	AT5G54270	At5g54270.1	N	01_PSII	2_no_N	-0.844	9.9115e-08
PSBA	ATCG00020	ATCG00020.1	C	01_PSII	2_no_N	1.628	4.27038e-06
PSBK	ATCG00070	ATCG00070.1	C	01_PSII	2_no_N	1.665	1.75694e-20
PSBI	ATCG00080	ATCG00080.1	C	01_PSII	2_no_N	1.747	1.37387e-16
PSBM	ATCG00220	ATCG00220.1	C	01_PSII	2_no_N	1.421	6.28433e-06
PSBD	ATCG00270	ATCG00270.1	C	01_PSII	2_no_N	1.159	5.16807e-05
PSBC	ATCG00280	ATCG00280.1	C	01_PSII	2_no_N	1.373	3.90102e-08
PSBZ	ATCG00300	ATCG00300.1	C	01_PSII	2_no_N	1.675	8.68394e-19
PSBJ	ATCG00550	ATCG00550.1	C	01_PSII	2_no_N	1.387	4.91276e-12
PSBL	ATCG00560	ATCG00560.1	C	01_PSII	2_no_N	1.429	9.55009e-14
PSBF	ATCG00570	ATCG00570.1	C	01_PSII	2_no_N	1.403	8.63556e-15
PSBE	ATCG00580	ATCG00580.1	C	01_PSII	2_no_N	1.403	1.76029e-13
PSBB	ATCG00680	ATCG00680.1	C	01_PSII	2_no_N	0.777	0.00156879
PSBN	ATCG00700	ATCG00700.1	C	01_PSII	2_no_N	1.681	6.34879e-13
PSBH	ATCG00710	ATCG00710.1	C	01_PSII	2_no_N	1.023	3.96793e-08
PSBP	AT1G06680	AT1G06680.1	N	01_PSII	OXRSH1	-5.927	5.95885e-207
LHCB6	AT1G15820	At1g15820.1	N	01_PSII	OXRSH1	-6.315	1.68839e-303
LHCB1.2	AT1G29910	At1g29910.1	N	01_PSII	OXRSH1	-7.371	2.75791e-260
LHCB1.1	AT1G29920	At1g29920.1	N	01_PSII	OXRSH1	-7.795	6.25563e-241
LHCB1.3	AT1G29930	AT1G29930.1	N	01_PSII	OXRSH1	-6.778	5.76341e-167
PSBS	AT1G44575	AT1G44575.2	N	01_PSII	OXRSH1	-4.271	8.0015e-193
PSBY	AT1G67740	AT1G67740.1	N	01_PSII	OXRSH1	-4.17	0
LHCB2.3	AT1G76570	AT1G76570.1	N	01_PSII	OXRSH1	0.32	0.0357351
PSBR	AT1G79040	AT1G79040.1	N	01_PSII	OXRSH1	-2.782	1.08647e-80
LHCB2.2	AT2G05070	At2g05070.1	N	01_PSII	OXRSH1	-7.046	0
LHCB2.1	AT2G05100	At2g05100.1	N	01_PSII	OXRSH1	-6.415	0
PSBX	AT2G06520	AT2G06520.1	N	01_PSII	OXRSH1	-4.742	6.86564e-251
PSBW	AT2G30570	AT2G30570.1	N	01_PSII	OXRSH1	-4.543	3.99628e-210
LHCB1.5	AT2G34420	At2g34420.1	N	01_PSII	OXRSH1	-4.992	2.63922e-144
LHCB1.4	AT2G34430	At2g34430.1	N	01_PSII	OXRSH1	-7.255	0
LHCB4.3	AT2G40100	AT2G40100.1	N	01_PSII	OXRSH1	-0.409	1.81686e-05
LHCB4.2	AT3G08940	At3g08940.2	N	01_PSII	OXRSH1	-5.898	2.07079e-263
PSBTN	AT3G21055	AT3G21055.1	N	01_PSII	OXRSH1	-6.596	0
LHCB2.4	AT3G27690	At3g27690.2	N	01_PSII	OXRSH1	-10.637	0
PSBO	AT3G50820	AT3G50820.1	N	01_PSII	OXRSH1	-6.248	0
PSBQ-2	AT4G05180	At4g05180.1	N	01_PSII	OXRSH1	-5.255	1.53296e-206
LHCB5	AT4G10340	At4g10340.1	N	01_PSII	OXRSH1	-5.733	1.66859e-226
PSBQ-1	AT4G21280	At4g21280.1	N	01_PSII	OXRSH1	-6.683	0
LHCB4.1	AT5G01530	AT5G01530.1	N	01_PSII	OXRSH1	-4.6	1.02192e-215
LHCB3	AT5G54270	At5g54270.1	N	01_PSII	OXRSH1	-6.36	9.15411e-248
PSBA	ATCG00020	ATCG00020.1	C	01_PSII	OXRSH1	1.188	2.87681e-05
PSBK	ATCG00070	ATCG00070.1	C	01_PSII	OXRSH1	-1.425	3.318e-28
PSBI	ATCG00080	ATCG00080.1	C	01_PSII	OXRSH1	-1.853	4.71709e-33
PSBM	ATCG00220	ATCG00220.1	C	01_PSII	OXRSH1	-0.546	0.0105873
PSBD	ATCG00270	ATCG00270.1	C	01_PSII	OXRSH1	-1.039	1.51128e-09
PSBC	ATCG00280	ATCG00280.1	C	01_PSII	OXRSH1	-1.113	6.62617e-10
PSBZ	ATCG00300	ATCG00300.1	C	01_PSII	OXRSH1	-2.356	2.31629e-123
PSBJ	ATCG00550	ATCG00550.1	C	01_PSII	OXRSH1	-1.247	1.90361e-18
PSBL	ATCG00560	ATCG00560.1	C	01_PSII	OXRSH1	-1.356	8.40748e-22
PSBF	ATCG00570	ATCG00570.1	C	01_PSII	OXRSH1	-1.333	2.29578e-21
PSBE	ATCG00580	ATCG00580.1	C	01_PSII	OXRSH1	-1.336	2.75491e-19
PSBB	ATCG00680	ATCG00680.1	C	01_PSII	OXRSH1	-2.218	1.50157e-31
PSBN	ATCG00700	ATCG00700.1	C	01_PSII	OXRSH1	2.918	3.38532e-84
PSBH	ATCG00710	ATCG00710.1	C	01_PSII	OXRSH1	-1.84	5.16294e-39
PSBP	AT1G06680	AT1G06680.1	N	01_PSII	WT	-4.917	2.35012e-108
LHCB6	AT1G15820	At1g15820.1	N	01_PSII	WT	-5.456	5.61836e-137
LHCB1.2	AT1G29910	At1g29910.1	N	01_PSII	WT	-5.753	1.56011e-120
LHCB1.1	AT1G29920	At1g29920.1	N	01_PSII	WT	-6.271	7.97841e-134
LHCB1.3	AT1G29930	AT1G29930.1	N	01_PSII	WT	-5.665	7.61151e-100
PSBS	AT1G44575	AT1G44575.2	N	01_PSII	WT	-3.357	1.54031e-89
PSBY	AT1G67740	AT1G67740.1	N	01_PSII	WT	-3.562	4.34114e-101
LHCB2.3	AT1G76570	AT1G76570.1	N	01_PSII	WT	1.291	8.14383e-15
PSBR	AT1G79040	AT1G79040.1	N	01_PSII	WT	-1.988	7.44526e-24
LHCB2.2	AT2G05070	At2g05070.1	N	01_PSII	WT	-5.901	7.45333e-165
LHCB2.1	AT2G05100	At2g05100.1	N	01_PSII	WT	-5.291	8.10369e-131
PSBX	AT2G06520	AT2G06520.1	N	01_PSII	WT	-3.908	1.41116e-93
PSBW	AT2G30570	AT2G30570.1	N	01_PSII	WT	-3.817	3.74261e-83
LHCB1.5	AT2G34420	At2g34420.1	N	01_PSII	WT	-3.905	2.7476e-64
LHCB1.4	AT2G34430	At2g34430.1	N	01_PSII	WT	-6.782	4.80258e-172
LHCB4.3	AT2G40100	AT2G40100.1	N	01_PSII	WT	-0.183	0.267718
LHCB4.2	AT3G08940	At3g08940.2	N	01_PSII	WT	-4.686	3.3316e-100
PSBTN	AT3G21055	AT3G21055.1	N	01_PSII	WT	-5.723	2.52574e-141
LHCB2.4	AT3G27690	At3g27690.2	N	01_PSII	WT	-9.254	2.74478e-305
PSBO	AT3G50820	AT3G50820.1	N	01_PSII	WT	-5.457	2.35814e-145
PSBQ-2	AT4G05180	At4g05180.1	N	01_PSII	WT	-4.138	1.59592e-88
LHCB5	AT4G10340	At4g10340.1	N	01_PSII	WT	-4.73	4.0894e-90
PSBQ-1	AT4G21280	At4g21280.1	N	01_PSII	WT	-6.015	9.14423e-188
LHCB4.1	AT5G01530	AT5G01530.1	N	01_PSII	WT	-4.025	7.27917e-89
LHCB3	AT5G54270	At5g54270.1	N	01_PSII	WT	-5.51	8.62203e-123
PSBA	ATCG00020	ATCG00020.1	C	01_PSII	WT	-0.193	0.563281
PSBK	ATCG00070	ATCG00070.1	C	01_PSII	WT	-2.795	5.83007e-61
PSBI	ATCG00080	ATCG00080.1	C	01_PSII	WT	-2.91	2.12098e-81
PSBM	ATCG00220	ATCG00220.1	C	01_PSII	WT	-1.177	7.71979e-10
PSBD	ATCG00270	ATCG00270.1	C	01_PSII	WT	-2.078	1.00392e-14
PSBC	ATCG00280	ATCG00280.1	C	01_PSII	WT	-2.356	3.86122e-22
PSBZ	ATCG00300	ATCG00300.1	C	01_PSII	WT	-3.797	1.60074e-62
PSBJ	ATCG00550	ATCG00550.1	C	01_PSII	WT	-2.32	4.76181e-31
PSBL	ATCG00560	ATCG00560.1	C	01_PSII	WT	-2.523	6.33179e-43
PSBF	ATCG00570	ATCG00570.1	C	01_PSII	WT	-2.599	4.63958e-46
PSBE	ATCG00580	ATCG00580.1	C	01_PSII	WT	-2.593	3.67843e-42
PSBB	ATCG00680	ATCG00680.1	C	01_PSII	WT	-2.819	2.06998e-31
PSBN	ATCG00700	ATCG00700.1	C	01_PSII	WT	1.399	1.45995e-14
PSBH	ATCG00710	ATCG00710.1	C	01_PSII	WT	-2.684	8.167e-40
PETM	AT2G26500.1	AT2G26500.1	N	02_CYTB6F	1_N	0.031	0.952437
PETC	AT4G03280.1	At4g03280.1	N	02_CYTB6F	1_N	-0.034	0.956489
PETN	ATCG00210.1	AtCg00210.1	C	02_CYTB6F	1_N	0.141	0.761041
PETA	ATCG00540.1	ATCG00540.1	C	02_CYTB6F	1_N	0.269	0.16649
PETL	ATCG00590.1	ATCG00590.1	C	02_CYTB6F	1_N	0.822	1.78344e-13
PETG	ATCG00600.1	ATCG00600.1	C	02_CYTB6F	1_N	0.548	5.65025e-12
PETB	ATCG00720.1	ATCG00720.1	C	02_CYTB6F	1_N	0.143	0.784003
PETD	ATCG00730.1	ATCG00730.1	C	02_CYTB6F	1_N	0.235	0.415828
PETM	AT2G26500.1	AT2G26500.1	N	02_CYTB6F	2_no_N	-0.342	0.131854
PETC	AT4G03280.1	At4g03280.1	N	02_CYTB6F	2_no_N	-0.87	1.02116e-09
PETN	ATCG00210.1	AtCg00210.1	C	02_CYTB6F	2_no_N	2.335	4.96249e-34
PETA	ATCG00540.1	ATCG00540.1	C	02_CYTB6F	2_no_N	1.372	4.37461e-13
PETL	ATCG00590.1	ATCG00590.1	C	02_CYTB6F	2_no_N	2.36	1.51079e-15
PETG	ATCG00600.1	ATCG00600.1	C	02_CYTB6F	2_no_N	2.247	1.57692e-23
PETB	ATCG00720.1	ATCG00720.1	C	02_CYTB6F	2_no_N	1.165	1.92725e-07
PETD	ATCG00730.1	ATCG00730.1	C	02_CYTB6F	2_no_N	1.343	6.0327e-10
PETM	AT2G26500.1	AT2G26500.1	N	02_CYTB6F	OXRSH1	-3.327	6.20273e-223
PETC	AT4G03280.1	At4g03280.1	N	02_CYTB6F	OXRSH1	-4.203	0
PETN	ATCG00210.1	AtCg00210.1	C	02_CYTB6F	OXRSH1	0.289	0.032197
PETA	ATCG00540.1	ATCG00540.1	C	02_CYTB6F	OXRSH1	-1.937	1.06307e-41
PETL	ATCG00590.1	ATCG00590.1	C	02_CYTB6F	OXRSH1	-0.528	0.017845
PETG	ATCG00600.1	ATCG00600.1	C	02_CYTB6F	OXRSH1	-0.437	0.00457193
PETB	ATCG00720.1	ATCG00720.1	C	02_CYTB6F	OXRSH1	-0.428	0.0134721
PETD	ATCG00730.1	ATCG00730.1	C	02_CYTB6F	OXRSH1	-0.57	0.000605054
PETM	AT2G26500.1	AT2G26500.1	N	02_CYTB6F	WT	-2.95	1.73119e-70
PETC	AT4G03280.1	At4g03280.1	N	02_CYTB6F	WT	-3.364	4.93507e-89
PETN	ATCG00210.1	AtCg00210.1	C	02_CYTB6F	WT	-1.9	1.68323e-29
PETA	ATCG00540.1	ATCG00540.1	C	02_CYTB6F	WT	-3.035	4.33382e-47
PETL	ATCG00590.1	ATCG00590.1	C	02_CYTB6F	WT	-2.05	3.92397e-32
PETG	ATCG00600.1	ATCG00600.1	C	02_CYTB6F	WT	-2.129	1.97771e-42
PETB	ATCG00720.1	ATCG00720.1	C	02_CYTB6F	WT	-1.444	1.60366e-12
PETD	ATCG00730.1	ATCG00730.1	C	02_CYTB6F	WT	-1.673	1.16844e-16
PSAD	AT1G03130	At1g03130.1	N	03_PSI	1_N	0.042	0.948201
PSAO	AT1G08380	AT1G08380.1	N	03_PSI	1_N	0.039	0.951564
LHCA2.1	AT1G19150	AT1G19150.1	N	03_PSI	1_N	-0.04	0.926827
PSAK	AT1G30380	At1g30380.1	N	03_PSI	1_N	0.011	0.984867
PSAF	AT1G31330	AT1G31330.1	N	03_PSI	1_N	-0.009	0.987516
LHCA5	AT1G45545	At1g45545.2	N	03_PSI	1_N	-1.586	0.778089
PSAH2	AT1G52230	AT1G52230.1	N	03_PSI	1_N	-0.014	0.98169
PSAG	AT1G55670	AT1G55670.1	N	03_PSI	1_N	0.028	0.973842
LHCA3	AT1G61520	AT1G61520.1	N	03_PSI	1_N	0.018	0.98107
PSAE	AT2G20260	At2g20260.1	N	03_PSI	1_N	0.014	0.978725
PSAH1	AT3G16140	AT3G16140.1	N	03_PSI	1_N	-0.031	0.956489
LHCA4	AT3G47470	At3g47470.1	N	03_PSI	1_N	0.059	0.931166
LHCA1	AT3G54890	At3g54890.3	N	03_PSI	1_N	-0.003	0.995551
LHCA2	AT3G61470	AT3G61470.1	N	03_PSI	1_N	0.034	0.968316
PSAL	AT4G12800	AT4G12800.1	N	03_PSI	1_N	0.033	0.96301
PSAN	AT5G64040	AT5G64040.1	N	03_PSI	1_N	0.032	0.969038
PSAB	ATCG00340	ATCG00340.1	C	03_PSI	1_N	0.116	0.856042
PSAA	ATCG00350	ATCG00350.1	C	03_PSI	1_N	0.125	0.837824
PSAI	ATCG00510	ATCG00510.1	C	03_PSI	1_N	0.631	5.5472e-10
PSAJ	ATCG00630	ATCG00630.1	C	03_PSI	1_N	0.304	0.0131416
PSAC	ATCG01060	ATCG01060.1	C	03_PSI	1_N	0.173	0.627888
PSAD	AT1G03130	At1g03130.1	N	03_PSI	2_no_N	-0.66	0.000105032
PSAO	AT1G08380	AT1G08380.1	N	03_PSI	2_no_N	-0.929	2.94151e-10
LHCA2.1	AT1G19150	AT1G19150.1	N	03_PSI	2_no_N	-1.527	0.00536317
PSAK	AT1G30380	At1g30380.1	N	03_PSI	2_no_N	-1.012	7.3711e-12
PSAF	AT1G31330	AT1G31330.1	N	03_PSI	2_no_N	-0.918	1.15747e-10
LHCA5	AT1G45545	At1g45545.2	N	03_PSI	2_no_N	-2.376	0.139301
PSAH2	AT1G52230	AT1G52230.1	N	03_PSI	2_no_N	-0.937	1.1795e-10
PSAG	AT1G55670	AT1G55670.1	N	03_PSI	2_no_N	-0.991	6.30292e-12
LHCA3	AT1G61520	AT1G61520.1	N	03_PSI	2_no_N	-0.844	2.00245e-06
PSAE	AT2G20260	At2g20260.1	N	03_PSI	2_no_N	-0.873	2.76271e-08
PSAH1	AT3G16140	AT3G16140.1	N	03_PSI	2_no_N	-0.928	1.0123e-10
LHCA4	AT3G47470	At3g47470.1	N	03_PSI	2_no_N	-0.803	1.04154e-06
LHCA1	AT3G54890	At3g54890.3	N	03_PSI	2_no_N	-0.907	2.37989e-08
LHCA2	AT3G61470	AT3G61470.1	N	03_PSI	2_no_N	-0.916	5.49628e-09
PSAL	AT4G12800	AT4G12800.1	N	03_PSI	2_no_N	-1.034	5.33131e-12
PSAN	AT5G64040	AT5G64040.1	N	03_PSI	2_no_N	-1.168	3.55351e-11
PSAB	ATCG00340	ATCG00340.1	C	03_PSI	2_no_N	1.063	0.000419203
PSAA	ATCG00350	ATCG00350.1	C	03_PSI	2_no_N	1.022	0.000771809
PSAI	ATCG00510	ATCG00510.1	C	03_PSI	2_no_N	1.683	6.92269e-16
PSAJ	ATCG00630	ATCG00630.1	C	03_PSI	2_no_N	2.15	2.16735e-25
PSAC	ATCG01060	ATCG01060.1	C	03_PSI	2_no_N	1.403	7.19213e-14
PSAD	AT1G03130	At1g03130.1	N	03_PSI	OXRSH1	-6.013	0
PSAO	AT1G08380	AT1G08380.1	N	03_PSI	OXRSH1	-5.657	3.17241e-251
LHCA2.1	AT1G19150	AT1G19150.1	N	03_PSI	OXRSH1	-7.106	0
PSAK	AT1G30380	At1g30380.1	N	03_PSI	OXRSH1	-5.872	0
PSAF	AT1G31330	AT1G31330.1	N	03_PSI	OXRSH1	-6.129	4.78765e-302
LHCA5	AT1G45545	At1g45545.2	N	03_PSI	OXRSH1	-0.761	0.618116
PSAH2	AT1G52230	AT1G52230.1	N	03_PSI	OXRSH1	-5.202	4.28264e-304
PSAG	AT1G55670	AT1G55670.1	N	03_PSI	OXRSH1	-6.207	0
LHCA3	AT1G61520	AT1G61520.1	N	03_PSI	OXRSH1	-4.637	1.05993e-145
PSAE	AT2G20260	At2g20260.1	N	03_PSI	OXRSH1	-4.469	0
PSAH1	AT3G16140	AT3G16140.1	N	03_PSI	OXRSH1	-4.088	3.93129e-307
LHCA4	AT3G47470	At3g47470.1	N	03_PSI	OXRSH1	-5.319	2.45942e-199
LHCA1	AT3G54890	At3g54890.3	N	03_PSI	OXRSH1	-5.523	1.61135e-229
LHCA2	AT3G61470	AT3G61470.1	N	03_PSI	OXRSH1	-5.051	6.38379e-194
PSAL	AT4G12800	AT4G12800.1	N	03_PSI	OXRSH1	-4.515	2.97984e-199
PSAN	AT5G64040	AT5G64040.1	N	03_PSI	OXRSH1	-5.994	2.05921e-283
PSAB	ATCG00340	ATCG00340.1	C	03_PSI	OXRSH1	-1.935	5.80166e-24
PSAA	ATCG00350	ATCG00350.1	C	03_PSI	OXRSH1	-1.841	5.07142e-21
PSAI	ATCG00510	ATCG00510.1	C	03_PSI	OXRSH1	-0.394	0.00877861
PSAJ	ATCG00630	ATCG00630.1	C	03_PSI	OXRSH1	-0.221	0.133204
PSAC	ATCG01060	ATCG01060.1	C	03_PSI	OXRSH1	-1.179	1.10415e-17
PSAD	AT1G03130	At1g03130.1	N	03_PSI	WT	-5.314	1.97176e-152
PSAO	AT1G08380	AT1G08380.1	N	03_PSI	WT	-4.686	2.95915e-111
LHCA2.1	AT1G19150	AT1G19150.1	N	03_PSI	WT	-5.698	1.43966e-163
PSAK	AT1G30380	At1g30380.1	N	03_PSI	WT	-4.845	3.99035e-127
PSAF	AT1G31330	AT1G31330.1	N	03_PSI	WT	-5.217	3.06565e-139
LHCA5	AT1G45545	At1g45545.2	N	03_PSI	WT	0.021	0.985404
PSAH2	AT1G52230	AT1G52230.1	N	03_PSI	WT	-4.276	2.70905e-117
PSAG	AT1G55670	AT1G55670.1	N	03_PSI	WT	-5.186	9.5314e-148
LHCA3	AT1G61520	AT1G61520.1	N	03_PSI	WT	-3.771	2.29535e-68
PSAE	AT2G20260	At2g20260.1	N	03_PSI	WT	-3.579	1.80819e-107
PSAH1	AT3G16140	AT3G16140.1	N	03_PSI	WT	-3.189	1.54794e-90
LHCA4	AT3G47470	At3g47470.1	N	03_PSI	WT	-4.452	4.83412e-81
LHCA1	AT3G54890	At3g54890.3	N	03_PSI	WT	-4.615	7.66338e-94
LHCA2	AT3G61470	AT3G61470.1	N	03_PSI	WT	-4.097	3.56146e-81
PSAL	AT4G12800	AT4G12800.1	N	03_PSI	WT	-3.444	3.58655e-78
PSAN	AT5G64040	AT5G64040.1	N	03_PSI	WT	-4.791	5.84111e-103
PSAB	ATCG00340	ATCG00340.1	C	03_PSI	WT	-2.878	1.10706e-22
PSAA	ATCG00350	ATCG00350.1	C	03_PSI	WT	-2.735	4.72688e-21
PSAI	ATCG00510	ATCG00510.1	C	03_PSI	WT	-1.441	2.60776e-19
PSAJ	ATCG00630	ATCG00630.1	C	03_PSI	WT	-2.063	3.63589e-32
PSAC	ATCG01060	ATCG01060.1	C	03_PSI	WT	-2.404	2.0795e-39
ATPC2	AT1G15700.1	AT1G15700.1	N	04_ATPase	1_N	0.098	0.898764
ATPC1	AT4G04640.1	AT4G04640.1	N	04_ATPase	1_N	-0.014	0.980792
ATPD	AT4G09650.1	AT4G09650.1	N	04_ATPase	1_N	-0.009	0.987289
ATPG	AT4G32260.1	AT4G32260.1	N	04_ATPase	1_N	0	0.999932
ATPE	AT5G15320.1	AT5G15320.1	N	04_ATPase	1_N	0.019	0.977321
ATPA	ATCG00120.1	ATCG00120.1	C	04_ATPase	1_N	-0.012	0.985245
ATPF	ATCG00130.1	ATCG00130.1	C	04_ATPase	1_N	0.128	0.820953
ATPH	ATCG00140.1	ATCG00140.1	C	04_ATPase	1_N	0.134	0.81306
ATPI	ATCG00150.1	ATCG00150.1	C	04_ATPase	1_N	0.172	0.666475
ATPE	ATCG00470.1	ATCG00470.1	C	04_ATPase	1_N	0.118	0.820953
ATPB	ATCG00480.1	AtCg00480.1	C	04_ATPase	1_N	0.065	0.914545
ATPC2	AT1G15700.1	AT1G15700.1	N	04_ATPase	2_no_N	-0.289	0.379721
ATPC1	AT4G04640.1	AT4G04640.1	N	04_ATPase	2_no_N	-0.84	1.13871e-08
ATPD	AT4G09650.1	AT4G09650.1	N	04_ATPase	2_no_N	-0.864	6.12044e-08
ATPG	AT4G32260.1	AT4G32260.1	N	04_ATPase	2_no_N	-0.739	1.11714e-06
ATPE	AT5G15320.1	AT5G15320.1	N	04_ATPase	2_no_N	0.36	0.137146
ATPA	ATCG00120.1	ATCG00120.1	C	04_ATPase	2_no_N	1.137	9.64434e-07
ATPF	ATCG00130.1	ATCG00130.1	C	04_ATPase	2_no_N	1.451	1.00883e-12
ATPH	ATCG00140.1	ATCG00140.1	C	04_ATPase	2_no_N	1.598	7.4396e-16
ATPI	ATCG00150.1	ATCG00150.1	C	04_ATPase	2_no_N	1.423	2.06834e-16
ATPE	ATCG00470.1	ATCG00470.1	C	04_ATPase	2_no_N	1.399	1.75329e-16
ATPB	ATCG00480.1	AtCg00480.1	C	04_ATPase	2_no_N	1.276	2.37289e-10
ATPC2	AT1G15700.1	AT1G15700.1	N	04_ATPase	OXRSH1	-0.821	6.3389e-07
ATPC1	AT4G04640.1	AT4G04640.1	N	04_ATPase	OXRSH1	-4.604	0
ATPD	AT4G09650.1	AT4G09650.1	N	04_ATPase	OXRSH1	-6.051	0
ATPG	AT4G32260.1	AT4G32260.1	N	04_ATPase	OXRSH1	-3.044	1.18752e-206
ATPE	AT5G15320.1	AT5G15320.1	N	04_ATPase	OXRSH1	0.34	9.61735e-06
ATPA	ATCG00120.1	ATCG00120.1	C	04_ATPase	OXRSH1	-1.866	2.37063e-31
ATPF	ATCG00130.1	ATCG00130.1	C	04_ATPase	OXRSH1	-1.652	1.26963e-25
ATPH	ATCG00140.1	ATCG00140.1	C	04_ATPase	OXRSH1	-1.163	4.0401e-14
ATPI	ATCG00150.1	ATCG00150.1	C	04_ATPase	OXRSH1	-2.062	8.45164e-50
ATPE	ATCG00470.1	ATCG00470.1	C	04_ATPase	OXRSH1	-2.08	1.81272e-51
ATPB	ATCG00480.1	AtCg00480.1	C	04_ATPase	OXRSH1	-2.276	1.87142e-46
ATPC2	AT1G15700.1	AT1G15700.1	N	04_ATPase	WT	-0.437	0.0343328
ATPC1	AT4G04640.1	AT4G04640.1	N	04_ATPase	WT	-3.775	1.83018e-93
ATPD	AT4G09650.1	AT4G09650.1	N	04_ATPase	WT	-5.193	1.54588e-155
ATPG	AT4G32260.1	AT4G32260.1	N	04_ATPase	WT	-2.301	1.16863e-52
ATPE	AT5G15320.1	AT5G15320.1	N	04_ATPase	WT	0.005	0.982336
ATPA	ATCG00120.1	ATCG00120.1	C	04_ATPase	WT	-3.011	1.99391e-35
ATPF	ATCG00130.1	ATCG00130.1	C	04_ATPase	WT	-2.97	1.96646e-45
ATPH	ATCG00140.1	ATCG00140.1	C	04_ATPase	WT	-2.622	2.39299e-38
ATPI	ATCG00150.1	ATCG00150.1	C	04_ATPase	WT	-3.307	4.56113e-64
ATPE	ATCG00470.1	ATCG00470.1	C	04_ATPase	WT	-3.357	1.73704e-65
ATPB	ATCG00480.1	AtCg00480.1	C	04_ATPase	WT	-3.482	2.87948e-51
PNSL2	AT1G14150	At1g14150.1	N	05_NDH	1_N	0.024	0.977321
PNSB1	AT1G15980	At1g15980.1	N	05_NDH	1_N	0.019	0.977321
PNSB4	AT1G18730	At1g18730.1	N	05_NDH	1_N	0.038	0.937927
PNSB2	AT1G64770	At1g64770.3	N	05_NDH	1_N	-0.096	0.820953
NDHL	AT1G70760	At1g70760.1	N	05_NDH	1_N	0.1	0.820953
NDHO	AT1G74880	At1g74880.1	N	05_NDH	1_N	-0.031	0.953217
NDHV	AT2G04039	At2g04039.1	N	05_NDH	1_N	0.047	0.916226
PNSL1	AT2G39470	At2g39470.1	N	05_NDH	1_N	-0.016	0.978276
PNSL3	AT3G01440	At3g01440.1	N	05_NDH	1_N	-0.033	0.963432
PNSB3	AT3G16250	At3g16250.1	N	05_NDH	1_N	0.009	0.984867
NDHT	AT4G09350	At4g09350.1	N	05_NDH	1_N	-0.131	0.820953
NDHS	AT4G23890	At4g23890.1	N	05_NDH	1_N	-0.077	0.856042
NDHM	AT4G37925	At4g37925.1	N	05_NDH	1_N	-0.1	0.820953
PNSL4	AT4G39710	At4g39710.1	N	05_NDH	1_N	0.023	0.973879
PNSL5	AT5G13120	At5g13120.1	N	05_NDH	1_N	-0.027	0.95587
NDHU	AT5G21430	At5g21430.1	N	05_NDH	1_N	0.035	0.947556
PNSB5	AT5G43750	At5g43750.1	N	05_NDH	1_N	-0.039	0.926825
NDHN	AT5G58260	At5g58260.1	N	05_NDH	1_N	0.083	0.856042
NDHJ	ATCG00420.1	ATCG00420.1	C	05_NDH	1_N	0.101	0.820953
NDHK	ATCG00430.1	ATCG00430.1	C	05_NDH	1_N	0.13	0.779341
NDHC	ATCG00440.1	ATCG00440.1	C	05_NDH	1_N	0.121	0.78264
NDHB.1	ATCG00890.1	ATCG00890.1	C	05_NDH	1_N	0.142	0.721274
NDHF	ATCG01010.1	ATCG01010.1	C	05_NDH	1_N	0.443	1.74909e-06
NDHD	ATCG01050.1	ATCG01050.1	C	05_NDH	1_N	0.267	0.119555
NDHE	ATCG01070.1	ATCG01070.1	C	05_NDH	1_N	0.376	2.74568e-05
NDHG	ATCG01080.1	ATCG01080.1	C	05_NDH	1_N	0.325	0.00299532
NDHI	ATCG01090.1	ATCG01090.1	C	05_NDH	1_N	0.16	0.528928
NDHA	ATCG01100.1	ATCG01100.1	C	05_NDH	1_N	0.204	0.415828
NDHH	ATCG01110.1	ATCG01110.1	C	05_NDH	1_N	0.092	0.820953
NDHB.2	ATCG01250.1	ATCG01250.1	C	05_NDH	1_N	0.144	0.704548
PNSL2	AT1G14150	At1g14150.1	N	05_NDH	2_no_N	-1.202	0.0504673
PNSB1	AT1G15980	At1g15980.1	N	05_NDH	2_no_N	-0.888	3.78677e-05
PNSB4	AT1G18730	At1g18730.1	N	05_NDH	2_no_N	-0.961	4.0715e-05
PNSB2	AT1G64770	At1g64770.3	N	05_NDH	2_no_N	-0.855	3.65735e-07
NDHL	AT1G70760	At1g70760.1	N	05_NDH	2_no_N	-1.275	1.46339e-05
NDHO	AT1G74880	At1g74880.1	N	05_NDH	2_no_N	-0.923	3.47151e-06
NDHV	AT2G04039	At2g04039.1	N	05_NDH	2_no_N	-0.966	1.49375e-08
PNSL1	AT2G39470	At2g39470.1	N	05_NDH	2_no_N	-1.057	9.42189e-05
PNSL3	AT3G01440	At3g01440.1	N	05_NDH	2_no_N	-1.219	0.16264
PNSB3	AT3G16250	At3g16250.1	N	05_NDH	2_no_N	-1.682	0.00513408
NDHT	AT4G09350	At4g09350.1	N	05_NDH	2_no_N	-0.824	0.000187941
NDHS	AT4G23890	At4g23890.1	N	05_NDH	2_no_N	-0.284	0.138245
NDHM	AT4G37925	At4g37925.1	N	05_NDH	2_no_N	-1.726	9.1679e-08
PNSL4	AT4G39710	At4g39710.1	N	05_NDH	2_no_N	-1.405	0.00194483
PNSL5	AT5G13120	At5g13120.1	N	05_NDH	2_no_N	-0.174	0.478337
NDHU	AT5G21430	At5g21430.1	N	05_NDH	2_no_N	-1.91	1.09082e-09
PNSB5	AT5G43750	At5g43750.1	N	05_NDH	2_no_N	-1.054	1.54716e-07
NDHN	AT5G58260	At5g58260.1	N	05_NDH	2_no_N	-1.257	2.70997e-06
NDHJ	ATCG00420.1	ATCG00420.1	C	05_NDH	2_no_N	1.57	2.25345e-20
NDHK	ATCG00430.1	ATCG00430.1	C	05_NDH	2_no_N	1.476	7.47844e-16
NDHC	ATCG00440.1	ATCG00440.1	C	05_NDH	2_no_N	1.5	1.21798e-20
NDHB.1	ATCG00890.1	ATCG00890.1	C	05_NDH	2_no_N	1.79	8.99481e-25
NDHF	ATCG01010.1	ATCG01010.1	C	05_NDH	2_no_N	1.354	1.3988e-12
NDHD	ATCG01050.1	ATCG01050.1	C	05_NDH	2_no_N	1.521	1.02194e-12
NDHE	ATCG01070.1	ATCG01070.1	C	05_NDH	2_no_N	1.378	1.75329e-16
NDHG	ATCG01080.1	ATCG01080.1	C	05_NDH	2_no_N	1.312	8.7977e-14
NDHI	ATCG01090.1	ATCG01090.1	C	05_NDH	2_no_N	0.91	4.16691e-07
NDHA	ATCG01100.1	ATCG01100.1	C	05_NDH	2_no_N	0.764	0.000137554
NDHH	ATCG01110.1	ATCG01110.1	C	05_NDH	2_no_N	1.337	2.41784e-12
NDHB.2	ATCG01250.1	ATCG01250.1	C	05_NDH	2_no_N	1.77	4.98545e-25
PNSL2	AT1G14150	At1g14150.1	N	05_NDH	OXRSH1	-6.436	2.15493e-301
PNSB1	AT1G15980	At1g15980.1	N	05_NDH	OXRSH1	-5.471	0
PNSB4	AT1G18730	At1g18730.1	N	05_NDH	OXRSH1	-4.324	1.07712e-294
PNSB2	AT1G64770	At1g64770.3	N	05_NDH	OXRSH1	-2.114	7.3903e-76
NDHL	AT1G70760	At1g70760.1	N	05_NDH	OXRSH1	-5.656	1.03676e-145
NDHO	AT1G74880	At1g74880.1	N	05_NDH	OXRSH1	-2.974	1.2886e-108
NDHV	AT2G04039	At2g04039.1	N	05_NDH	OXRSH1	-2.632	2.32007e-111
PNSL1	AT2G39470	At2g39470.1	N	05_NDH	OXRSH1	-5.792	0
PNSL3	AT3G01440	At3g01440.1	N	05_NDH	OXRSH1	-5.916	4.8578e-169
PNSB3	AT3G16250	At3g16250.1	N	05_NDH	OXRSH1	-7.958	0
NDHT	AT4G09350	At4g09350.1	N	05_NDH	OXRSH1	-1.939	1.49983e-43
NDHS	AT4G23890	At4g23890.1	N	05_NDH	OXRSH1	-1.203	2.11846e-57
NDHM	AT4G37925	At4g37925.1	N	05_NDH	OXRSH1	-4.841	2.4698e-70
PNSL4	AT4G39710	At4g39710.1	N	05_NDH	OXRSH1	-6.49	0
PNSL5	AT5G13120	At5g13120.1	N	05_NDH	OXRSH1	-2.112	8.42171e-141
NDHU	AT5G21430	At5g21430.1	N	05_NDH	OXRSH1	-5.61	2.42139e-261
PNSB5	AT5G43750	At5g43750.1	N	05_NDH	OXRSH1	-4.663	0
NDHN	AT5G58260	At5g58260.1	N	05_NDH	OXRSH1	-4.529	5.02172e-236
NDHJ	ATCG00420.1	ATCG00420.1	C	05_NDH	OXRSH1	-1.101	4.96132e-20
NDHK	ATCG00430.1	ATCG00430.1	C	05_NDH	OXRSH1	-1.477	2.61272e-33
NDHC	ATCG00440.1	ATCG00440.1	C	05_NDH	OXRSH1	-1.538	2.07975e-47
NDHB.1	ATCG00890.1	ATCG00890.1	C	05_NDH	OXRSH1	-1.31	2.1132e-28
NDHF	ATCG01010.1	ATCG01010.1	C	05_NDH	OXRSH1	-3.134	2.59706e-94
NDHD	ATCG01050.1	ATCG01050.1	C	05_NDH	OXRSH1	-0.566	0.000228784
NDHE	ATCG01070.1	ATCG01070.1	C	05_NDH	OXRSH1	-1.572	2.14746e-40
NDHG	ATCG01080.1	ATCG01080.1	C	05_NDH	OXRSH1	-1.6	2.73219e-37
NDHI	ATCG01090.1	ATCG01090.1	C	05_NDH	OXRSH1	-2.126	2.44851e-95
NDHA	ATCG01100.1	ATCG01100.1	C	05_NDH	OXRSH1	-2.374	1.36211e-73
NDHH	ATCG01110.1	ATCG01110.1	C	05_NDH	OXRSH1	-2.315	4.88094e-99
NDHB.2	ATCG01250.1	ATCG01250.1	C	05_NDH	OXRSH1	-1.309	9.37651e-29
PNSL2	AT1G14150	At1g14150.1	N	05_NDH	WT	-5.277	1.15686e-163
PNSB1	AT1G15980	At1g15980.1	N	05_NDH	WT	-4.576	8.26177e-179
PNSB4	AT1G18730	At1g18730.1	N	05_NDH	WT	-3.33	6.19197e-95
PNSB2	AT1G64770	At1g64770.3	N	05_NDH	WT	-1.353	4.47913e-24
NDHL	AT1G70760	At1g70760.1	N	05_NDH	WT	-4.308	2.55839e-166
NDHO	AT1G74880	At1g74880.1	N	05_NDH	WT	-2.084	4.46055e-53
NDHV	AT2G04039	At2g04039.1	N	05_NDH	WT	-1.621	9.29203e-29
PNSL1	AT2G39470	At2g39470.1	N	05_NDH	WT	-4.765	8.8092e-193
PNSL3	AT3G01440	At3g01440.1	N	05_NDH	WT	-4.935	6.2845e-89
PNSB3	AT3G16250	At3g16250.1	N	05_NDH	WT	-6.317	6.46714e-234
NDHT	AT4G09350	At4g09350.1	N	05_NDH	WT	-1.245	6.83314e-16
NDHS	AT4G23890	At4g23890.1	N	05_NDH	WT	-0.994	2.5005e-13
NDHM	AT4G37925	At4g37925.1	N	05_NDH	WT	-3.244	4.82051e-96
PNSL4	AT4G39710	At4g39710.1	N	05_NDH	WT	-5.075	9.03222e-159
PNSL5	AT5G13120	At5g13120.1	N	05_NDH	WT	-1.962	1.97542e-46
NDHU	AT5G21430	At5g21430.1	N	05_NDH	WT	-3.724	2.20784e-87
PNSB5	AT5G43750	At5g43750.1	N	05_NDH	WT	-3.649	1.57634e-135
NDHN	AT5G58260	At5g58260.1	N	05_NDH	WT	-3.203	2.50455e-88
NDHJ	ATCG00420.1	ATCG00420.1	C	05_NDH	WT	-2.566	1.08857e-48
NDHK	ATCG00430.1	ATCG00430.1	C	05_NDH	WT	-2.818	1.01925e-50
NDHC	ATCG00440.1	ATCG00440.1	C	05_NDH	WT	-2.912	5.87946e-63
NDHB.1	ATCG00890.1	ATCG00890.1	C	05_NDH	WT	-2.953	2.28429e-57
NDHF	ATCG01010.1	ATCG01010.1	C	05_NDH	WT	-4.04	1.13016e-120
NDHD	ATCG01050.1	ATCG01050.1	C	05_NDH	WT	-1.815	2.32079e-22
NDHE	ATCG01070.1	ATCG01070.1	C	05_NDH	WT	-2.57	3.21476e-58
NDHG	ATCG01080.1	ATCG01080.1	C	05_NDH	WT	-2.584	5.26191e-53
NDHI	ATCG01090.1	ATCG01090.1	C	05_NDH	WT	-2.872	1.78351e-62
NDHA	ATCG01100.1	ATCG01100.1	C	05_NDH	WT	-2.929	5.67485e-51
NDHH	ATCG01110.1	ATCG01110.1	C	05_NDH	WT	-3.555	2.59771e-61
NDHB.2	ATCG01250.1	ATCG01250.1	C	05_NDH	WT	-2.931	2.60739e-58
HEMA1	AT1G58290	At1g58290.1	N	06_RUBISCO	1_N	-0.094	0.856042
RBCS1A	AT1G67090	At1g67090.1	N	06_RUBISCO	1_N	-0.03	0.977263
GSA1	AT3G48730	At3g48730.1	N	06_RUBISCO	1_N	0.008	0.984556
RBCS3B	AT5G38410	At5g38410.3	N	06_RUBISCO	1_N	0.004	0.991873
RBCS2B	AT5G38420	At5g38420.1	N	06_RUBISCO	1_N	-0.081	0.856042
RBCS1B	AT5G38430	At5g38430.1	N	06_RUBISCO	1_N	-0.058	0.908487
GLURS	AT5G64050	At5g64050.1	N	06_RUBISCO	1_N	-0.01	0.980792
RBCL	ATCG00490.1	ATCG00490.1	C	06_RUBISCO	1_N	0.234	0.76805
HEMA1	AT1G58290	At1g58290.1	N	06_RUBISCO	2_no_N	-0.118	0.639205
RBCS1A	AT1G67090	At1g67090.1	N	06_RUBISCO	2_no_N	-0.779	7.9869e-06
GSA1	AT3G48730	At3g48730.1	N	06_RUBISCO	2_no_N	-0.426	0.0151996
RBCS3B	AT5G38410	At5g38410.3	N	06_RUBISCO	2_no_N	-1.193	2.66834e-13
RBCS2B	AT5G38420	At5g38420.1	N	06_RUBISCO	2_no_N	-0.941	6.67995e-06
RBCS1B	AT5G38430	At5g38430.1	N	06_RUBISCO	2_no_N	-0.863	2.75438e-06
GLURS	AT5G64050	At5g64050.1	N	06_RUBISCO	2_no_N	-0.044	0.893695
RBCL	ATCG00490.1	ATCG00490.1	C	06_RUBISCO	2_no_N	0.508	0.15558
HEMA1	AT1G58290	At1g58290.1	N	06_RUBISCO	OXRSH1	-4.29	0
RBCS1A	AT1G67090	At1g67090.1	N	06_RUBISCO	OXRSH1	-6.198	2.71144e-225
GSA1	AT3G48730	At3g48730.1	N	06_RUBISCO	OXRSH1	-4.11	0
RBCS3B	AT5G38410	At5g38410.3	N	06_RUBISCO	OXRSH1	-8.614	0
RBCS2B	AT5G38420	At5g38420.1	N	06_RUBISCO	OXRSH1	-8.668	0
RBCS1B	AT5G38430	At5g38430.1	N	06_RUBISCO	OXRSH1	-7.903	0
GLURS	AT5G64050	At5g64050.1	N	06_RUBISCO	OXRSH1	-1.726	4.25704e-103
RBCL	ATCG00490.1	ATCG00490.1	C	06_RUBISCO	OXRSH1	-3.123	9.99242e-36
HEMA1	AT1G58290	At1g58290.1	N	06_RUBISCO	WT	-4.263	1.16682e-149
RBCS1A	AT1G67090	At1g67090.1	N	06_RUBISCO	WT	-5.445	4.36593e-100
GSA1	AT3G48730	At3g48730.1	N	06_RUBISCO	WT	-3.672	1.16269e-132
RBCS3B	AT5G38410	At5g38410.3	N	06_RUBISCO	WT	-7.412	3.64071e-178
RBCS2B	AT5G38420	At5g38420.1	N	06_RUBISCO	WT	-7.808	1.53639e-192
RBCS1B	AT5G38430	At5g38430.1	N	06_RUBISCO	WT	-7.092	1.81638e-200
GLURS	AT5G64050	At5g64050.1	N	06_RUBISCO	WT	-1.687	3.84537e-38
RBCL	ATCG00490.1	ATCG00490.1	C	06_RUBISCO	WT	-3.392	1.58189e-30
PORC	AT1G03630	At1g03630.1	N	07_CHL biosynthesis	1_N	-0.06	0.856042
CHLD	AT1G08520	At1g08520.1	N	07_CHL biosynthesis	1_N	-0.098	0.76805
HEMB	AT1G44318	At1g44318.1	N	07_CHL biosynthesis	1_N	0	1
CAO	AT1G44446	At1g44446.1	N	07_CHL biosynthesis	1_N	-0.126	0.778089
HEMD	AT2G26540	At2g26540.3	N	07_CHL biosynthesis	1_N	-0.019	0.978276
HEME2	AT2G40490	At2g40490.1	N	07_CHL biosynthesis	1_N	0.039	0.919971
G4/CHLG	AT3G51820	At3g51820.1	N	07_CHL biosynthesis	1_N	-0.092	0.778089
CRD1	AT3G56940	At3g56940.1	N	07_CHL biosynthesis	1_N	-0.046	0.941773
GUN4	AT3G59400	At3g59400.1	N	07_CHL biosynthesis	1_N	-0.063	0.879218
HEMF1	AT4G03205	At4g03205.2	N	07_CHL biosynthesis	1_N	-0.02	0.978725
CHLI	AT4G18480	At4g18480.1	N	07_CHL biosynthesis	1_N	0.007	0.987516
CHLM	AT4G25080	At4g25080.4	N	07_CHL biosynthesis	1_N	0	1
PORB	AT4G27440	At4g27440.1	N	07_CHL biosynthesis	1_N	-0.009	0.985245
HEMC	AT5G08280	At5g08280.1	N	07_CHL biosynthesis	1_N	-0.053	0.865768
CHLH	AT5G13630	At5g13630.1	N	07_CHL biosynthesis	1_N	-0.063	0.907497
PPOX	AT5G14220	At5g14220.4	N	07_CHL biosynthesis	1_N	-0.002	0.994582
DVR	AT5G18660	At5g18660.1	N	07_CHL biosynthesis	1_N	0.086	0.820953
PORA	AT5G54190	At5g54190.2	N	07_CHL biosynthesis	1_N	-0.413	0.107167
TRNE	ATCG00250	ATCG00250.1	C	07_CHL biosynthesis	1_N	0.437	0.904227
PORC	AT1G03630	At1g03630.1	N	07_CHL biosynthesis	2_no_N	-0.983	4.67911e-11
CHLD	AT1G08520	At1g08520.1	N	07_CHL biosynthesis	2_no_N	-0.298	0.192791
HEMB	AT1G44318	At1g44318.1	N	07_CHL biosynthesis	2_no_N	-2.041	0.39403
CAO	AT1G44446	At1g44446.1	N	07_CHL biosynthesis	2_no_N	-0.554	0.00124419
HEMD	AT2G26540	At2g26540.3	N	07_CHL biosynthesis	2_no_N	-0.191	0.620117
HEME2	AT2G40490	At2g40490.1	N	07_CHL biosynthesis	2_no_N	-0.055	0.861236
G4/CHLG	AT3G51820	At3g51820.1	N	07_CHL biosynthesis	2_no_N	-0.46	0.0150428
CRD1	AT3G56940	At3g56940.1	N	07_CHL biosynthesis	2_no_N	-0.906	3.72103e-10
GUN4	AT3G59400	At3g59400.1	N	07_CHL biosynthesis	2_no_N	-0.66	0.167554
HEMF1	AT4G03205	At4g03205.2	N	07_CHL biosynthesis	2_no_N	-0.278	0.38189
CHLI	AT4G18480	At4g18480.1	N	07_CHL biosynthesis	2_no_N	-0.36	0.0515266
CHLM	AT4G25080	At4g25080.4	N	07_CHL biosynthesis	2_no_N	0	1
PORB	AT4G27440	At4g27440.1	N	07_CHL biosynthesis	2_no_N	-0.7	1.49764e-05
HEMC	AT5G08280	At5g08280.1	N	07_CHL biosynthesis	2_no_N	0.113	0.653312
CHLH	AT5G13630	At5g13630.1	N	07_CHL biosynthesis	2_no_N	-0.676	0.00328753
PPOX	AT5G14220	At5g14220.4	N	07_CHL biosynthesis	2_no_N	0.201	0.454161
DVR	AT5G18660	At5g18660.1	N	07_CHL biosynthesis	2_no_N	-0.559	0.0666529
PORA	AT5G54190	At5g54190.2	N	07_CHL biosynthesis	2_no_N	-0.919	0.653605
TRNE	ATCG00250	ATCG00250.1	C	07_CHL biosynthesis	2_no_N	1.077	0.193224
PORC	AT1G03630	At1g03630.1	N	07_CHL biosynthesis	OXRSH1	-4.084	0
CHLD	AT1G08520	At1g08520.1	N	07_CHL biosynthesis	OXRSH1	-3.8	0
HEMB	AT1G44318	At1g44318.1	N	07_CHL biosynthesis	OXRSH1	1.861	0.32161
CAO	AT1G44446	At1g44446.1	N	07_CHL biosynthesis	OXRSH1	-4.051	0
HEMD	AT2G26540	At2g26540.3	N	07_CHL biosynthesis	OXRSH1	-2.863	5.2076e-85
HEME2	AT2G40490	At2g40490.1	N	07_CHL biosynthesis	OXRSH1	-3.973	0
G4/CHLG	AT3G51820	At3g51820.1	N	07_CHL biosynthesis	OXRSH1	-2.72	2.76181e-147
CRD1	AT3G56940	At3g56940.1	N	07_CHL biosynthesis	OXRSH1	-5.235	4.02713e-266
GUN4	AT3G59400	At3g59400.1	N	07_CHL biosynthesis	OXRSH1	-5.965	0
HEMF1	AT4G03205	At4g03205.2	N	07_CHL biosynthesis	OXRSH1	-1.817	1.25502e-49
CHLI	AT4G18480	At4g18480.1	N	07_CHL biosynthesis	OXRSH1	-5.155	0
CHLM	AT4G25080	At4g25080.4	N	07_CHL biosynthesis	OXRSH1	0	1
PORB	AT4G27440	At4g27440.1	N	07_CHL biosynthesis	OXRSH1	-6.522	0
HEMC	AT5G08280	At5g08280.1	N	07_CHL biosynthesis	OXRSH1	-3.785	0
CHLH	AT5G13630	At5g13630.1	N	07_CHL biosynthesis	OXRSH1	-5.357	3.1351e-189
PPOX	AT5G14220	At5g14220.4	N	07_CHL biosynthesis	OXRSH1	-1.301	5.47433e-48
DVR	AT5G18660	At5g18660.1	N	07_CHL biosynthesis	OXRSH1	-5.835	0
PORA	AT5G54190	At5g54190.2	N	07_CHL biosynthesis	OXRSH1	-6.706	1.08016e-80
TRNE	ATCG00250	ATCG00250.1	C	07_CHL biosynthesis	OXRSH1	0.409	0.482704
PORC	AT1G03630	At1g03630.1	N	07_CHL biosynthesis	WT	-3.166	2.49158e-86
CHLD	AT1G08520	At1g08520.1	N	07_CHL biosynthesis	WT	-3.598	8.42391e-133
HEMB	AT1G44318	At1g44318.1	N	07_CHL biosynthesis	WT	4.241	0.0184847
CAO	AT1G44446	At1g44446.1	N	07_CHL biosynthesis	WT	-3.621	1.65815e-119
HEMD	AT2G26540	At2g26540.3	N	07_CHL biosynthesis	WT	-2.686	4.28262e-59
HEME2	AT2G40490	At2g40490.1	N	07_CHL biosynthesis	WT	-3.875	4.40978e-139
G4/CHLG	AT3G51820	At3g51820.1	N	07_CHL biosynthesis	WT	-2.351	1.47822e-66
CRD1	AT3G56940	At3g56940.1	N	07_CHL biosynthesis	WT	-4.371	4.73765e-112
GUN4	AT3G59400	At3g59400.1	N	07_CHL biosynthesis	WT	-5.417	1.3109e-183
HEMF1	AT4G03205	At4g03205.2	N	07_CHL biosynthesis	WT	-1.548	7.94514e-19
CHLI	AT4G18480	At4g18480.1	N	07_CHL biosynthesis	WT	-4.785	1.52808e-158
CHLM	AT4G25080	At4g25080.4	N	07_CHL biosynthesis	WT	0	1
PORB	AT4G27440	At4g27440.1	N	07_CHL biosynthesis	WT	-5.83	2.8684e-183
HEMC	AT5G08280	At5g08280.1	N	07_CHL biosynthesis	WT	-3.946	5.41267e-143
CHLH	AT5G13630	At5g13630.1	N	07_CHL biosynthesis	WT	-4.743	2.05337e-99
PPOX	AT5G14220	At5g14220.4	N	07_CHL biosynthesis	WT	-1.499	9.73196e-29
DVR	AT5G18660	At5g18660.1	N	07_CHL biosynthesis	WT	-5.198	7.08991e-196
PORA	AT5G54190	At5g54190.2	N	07_CHL biosynthesis	WT	-6.437	2.59526e-91
TRNE	ATCG00250	ATCG00250.1	C	07_CHL biosynthesis	WT	-0.162	0.826578
PAO	AT3G44880	At3g44880.1	N	08_CHL degradation	1_N	-0.124	0.796906
NYC1	AT4G13250	At4g13250.1	N	08_CHL degradation	1_N	-0.037	0.920586
NOL1	AT5G04900	At5g04900.1	N	08_CHL degradation	1_N	-0.068	0.898646
PPH	AT5G13800	At5g13800.1	N	08_CHL degradation	1_N	-0.013	0.98169
PAO	AT3G44880	At3g44880.1	N	08_CHL degradation	2_no_N	0.021	0.950144
NYC1	AT4G13250	At4g13250.1	N	08_CHL degradation	2_no_N	0.413	0.0628413
NOL1	AT5G04900	At5g04900.1	N	08_CHL degradation	2_no_N	-0.077	0.799989
PPH	AT5G13800	At5g13800.1	N	08_CHL degradation	2_no_N	0.142	0.610599
PAO	AT3G44880	At3g44880.1	N	08_CHL degradation	OXRSH1	1.043	6.82036e-36
NYC1	AT4G13250	At4g13250.1	N	08_CHL degradation	OXRSH1	0.913	5.63968e-25
NOL1	AT5G04900	At5g04900.1	N	08_CHL degradation	OXRSH1	-0.226	0.044841
PPH	AT5G13800	At5g13800.1	N	08_CHL degradation	OXRSH1	2.746	2.12182e-212
PAO	AT3G44880	At3g44880.1	N	08_CHL degradation	WT	0.9	2.66585e-11
NYC1	AT4G13250	At4g13250.1	N	08_CHL degradation	WT	0.468	0.00109081
NOL1	AT5G04900	At5g04900.1	N	08_CHL degradation	WT	-0.206	0.168051
PPH	AT5G13800	At5g13800.1	N	08_CHL degradation	WT	2.593	4.81742e-79
PAP8	AT1G21600	At1g21600.1	N	09_PEP	1_N	0.003	0.991413
PAP2	AT1G74850	At1g74850.1	N	09_PEP	1_N	-0.072	0.856042
PAP5	AT2G34640	At2g34640.1	N	09_PEP	1_N	-0.048	0.914913
PAP1	AT3G04260	At3g04260.1	N	09_PEP	1_N	0.013	0.978725
PAP10	AT3G06730	At3g06730.1	N	09_PEP	1_N	0.011	0.983629
PAP3	AT3G48500	At3g48500.1	N	09_PEP	1_N	0.004	0.990872
PAP6	AT3G54090	At3g54090.1	N	09_PEP	1_N	0.073	0.820953
PAP7	AT4G20130	At4g20130.1	N	09_PEP	1_N	0.004	0.990003
PAP4	AT5G23310	At5g23310.1	N	09_PEP	1_N	-0.128	0.676927
PAP4	AT5G23310	At5g23310.1	N	09_PEP	1_N	-0.128	0.676927
PAP9	AT5G51100	At5g51100.1	N	09_PEP	1_N	0	1
RPOC2	ATCG00170	AtCg00170.1	C	09_PEP	1_N	0.03	0.969038
RPOC1	ATCG00180	AtCg00180.1	C	09_PEP	1_N	0.032	0.959705
RPOB	ATCG00190	AtCg00190.1	C	09_PEP	1_N	0.081	0.856042
RPOA	ATCG00740	AtCg00740.1	C	09_PEP	1_N	0.139	0.702719
PAP8	AT1G21600	At1g21600.1	N	09_PEP	2_no_N	-0.092	0.737032
PAP2	AT1G74850	At1g74850.1	N	09_PEP	2_no_N	-0.353	0.292037
PAP5	AT2G34640	At2g34640.1	N	09_PEP	2_no_N	-0.606	0.030208
PAP1	AT3G04260	At3g04260.1	N	09_PEP	2_no_N	-0.611	0.00292751
PAP10	AT3G06730	At3g06730.1	N	09_PEP	2_no_N	-0.129	0.689286
PAP3	AT3G48500	At3g48500.1	N	09_PEP	2_no_N	-0.403	0.154057
PAP6	AT3G54090	At3g54090.1	N	09_PEP	2_no_N	-0.598	0.0101278
PAP7	AT4G20130	At4g20130.1	N	09_PEP	2_no_N	-0.52	0.0103674
PAP4	AT5G23310	At5g23310.1	N	09_PEP	2_no_N	-0.116	0.737629
PAP4	AT5G23310	At5g23310.1	N	09_PEP	2_no_N	-0.116	0.737629
PAP9	AT5G51100	At5g51100.1	N	09_PEP	2_no_N	0	1
RPOC2	ATCG00170	AtCg00170.1	C	09_PEP	2_no_N	1.441	1.94605e-07
RPOC1	ATCG00180	AtCg00180.1	C	09_PEP	2_no_N	1.224	8.03391e-11
RPOB	ATCG00190	AtCg00190.1	C	09_PEP	2_no_N	1.214	1.80173e-08
RPOA	ATCG00740	AtCg00740.1	C	09_PEP	2_no_N	1.433	2.9823e-13
PAP8	AT1G21600	At1g21600.1	N	09_PEP	OXRSH1	-2.34	8.31412e-182
PAP2	AT1G74850	At1g74850.1	N	09_PEP	OXRSH1	-3.098	3.4282e-168
PAP5	AT2G34640	At2g34640.1	N	09_PEP	OXRSH1	-4.306	7.81495e-295
PAP1	AT3G04260	At3g04260.1	N	09_PEP	OXRSH1	-3.022	1.84004e-241
PAP10	AT3G06730	At3g06730.1	N	09_PEP	OXRSH1	-2.605	8.00582e-153
PAP3	AT3G48500	At3g48500.1	N	09_PEP	OXRSH1	-3.356	2.6266e-215
PAP6	AT3G54090	At3g54090.1	N	09_PEP	OXRSH1	-3.653	5.04496e-293
PAP7	AT4G20130	At4g20130.1	N	09_PEP	OXRSH1	-3.148	2.47486e-266
PAP4	AT5G23310	At5g23310.1	N	09_PEP	OXRSH1	-2.63	5.82875e-127
PAP4	AT5G23310	At5g23310.1	N	09_PEP	OXRSH1	-2.63	5.82875e-127
PAP9	AT5G51100	At5g51100.1	N	09_PEP	OXRSH1	0	1
RPOC2	ATCG00170	AtCg00170.1	C	09_PEP	OXRSH1	-2.946	9.67148e-111
RPOC1	ATCG00180	AtCg00180.1	C	09_PEP	OXRSH1	-2.297	1.27877e-98
RPOB	ATCG00190	AtCg00190.1	C	09_PEP	OXRSH1	-2.809	1.04105e-118
RPOA	ATCG00740	AtCg00740.1	C	09_PEP	OXRSH1	-2.41	1.49657e-108
PAP8	AT1G21600	At1g21600.1	N	09_PEP	WT	-2.239	1.18601e-51
PAP2	AT1G74850	At1g74850.1	N	09_PEP	WT	-2.814	8.80788e-52
PAP5	AT2G34640	At2g34640.1	N	09_PEP	WT	-3.745	8.05723e-110
PAP1	AT3G04260	At3g04260.1	N	09_PEP	WT	-2.396	1.38133e-52
PAP10	AT3G06730	At3g06730.1	N	09_PEP	WT	-2.457	2.68548e-60
PAP3	AT3G48500	At3g48500.1	N	09_PEP	WT	-2.944	1.49413e-66
PAP6	AT3G54090	At3g54090.1	N	09_PEP	WT	-2.978	1.54343e-88
PAP7	AT4G20130	At4g20130.1	N	09_PEP	WT	-2.621	3.40915e-73
PAP4	AT5G23310	At5g23310.1	N	09_PEP	WT	-2.641	1.68271e-78
PAP4	AT5G23310	At5g23310.1	N	09_PEP	WT	-2.641	1.68271e-78
PAP9	AT5G51100	At5g51100.1	N	09_PEP	WT	0	1
RPOC2	ATCG00170	AtCg00170.1	C	09_PEP	WT	-4.361	1.44263e-45
RPOC1	ATCG00180	AtCg00180.1	C	09_PEP	WT	-3.485	1.21674e-55
RPOB	ATCG00190	AtCg00190.1	C	09_PEP	WT	-3.941	1.43571e-58
RPOA	ATCG00740	AtCg00740.1	C	09_PEP	WT	-3.699	2.63322e-69
WHY1-/PTAC1	AT1G14410	AT1G14410.1	N	10_PEP2	1_N	0.055	0.915963
PAP8/PTAC6	AT1G21600	AT1G21600.1	N	10_PEP2	1_N	0.003	0.991413
PAP11/MURE-LIKE	AT1G63680	AT1G63680.2	N	10_PEP2	1_N	-0.015	0.977321
PTAC4/VIPP1(HCF155)	AT1G65260	AT1G65260.2	N	10_PEP2	1_N	-0.055	0.856042
FLN2	AT1G69200	AT1G69200.1	N	10_PEP2	1_N	-0.047	0.916636
PAP2/PTAC2	AT1G74850	AT1G74850.1	N	10_PEP2	1_N	-0.072	0.856042
PTAC17	AT1G80480	AT1G80480.1	N	10_PEP2	1_N	0.019	0.974222
WHY3/PTAC11	AT2G02740	AT2G02740.1	N	10_PEP2	1_N	0.021	0.978372
PTAC18	AT2G32180	AT2G32180.1	N	10_PEP2	1_N	0.145	0.717174
PAP5/PTAC12	AT2G34640	AT2G34640.1	N	10_PEP2	1_N	-0.048	0.914913
PAP1/PTAC3	AT3G04260	AT3G04260.1	N	10_PEP2	1_N	0.013	0.978725
PAP10/TRXZ	AT3G06730	AT3G06730.1	N	10_PEP2	1_N	0.011	0.983629
PTAC13	AT3G09210	AT3G09210.1	N	10_PEP2	1_N	0.034	0.935028
DNAGYRASEB1/2	AT3G10270	AT3G10270.2	N	10_PEP2	1_N	0.048	0.898628
DNAGYRASEA	AT3G10690	AT3G10690.1	N	10_PEP2	1_N	-0.135	0.729246
MFP1	AT3G16000	AT3G16000.1	N	10_PEP2	1_N	-0.019	0.977263
POLIB/DNAPOLYMERASEI	AT3G20540	AT3G20540.1	N	10_PEP2	1_N	0.004	0.990872
TCP34	AT3G26580	AT3G26580.1	N	10_PEP2	1_N	-0.081	0.856042
PTAC16	AT3G46780	AT3G46780.1	N	10_PEP2	1_N	-0.1	0.820953
PAP3/PTAC10	AT3G48500	AT3G48500.1	N	10_PEP2	1_N	0.004	0.990872
PEND	AT3G52170	AT3G52170.2	N	10_PEP2	1_N	0.006	0.989771
PAP6/FLN1	AT3G54090	AT3G54090.1	N	10_PEP2	1_N	0.073	0.820953
PTAC5	AT4G13670	AT4G13670.2	N	10_PEP2	1_N	-0.111	0.796953
PTAC9	AT4G20010	AT4G20010.1	N	10_PEP2	1_N	0.078	0.856042
PAP7/PTAC14	AT4G20130	AT4G20130.1	N	10_PEP2	1_N	0.004	0.990003
SIR/DCP68	AT5G04590	AT5G04590.1	N	10_PEP2	1_N	-0.096	0.807606
CND41	AT5G10760	AT5G10760.1	N	10_PEP2	1_N	0.148	0.926579
PAP4/FSD3	AT5G23310	AT5G23310.1	N	10_PEP2	1_N	-0.128	0.676927
PAP12/PTAC7	AT5G24314	AT5G24314.1	N	10_PEP2	1_N	0.051	0.86193
PAP9/FSD2	AT5G51100	AT5G51100.2	N	10_PEP2	1_N	-0.107	0.820953
PTAC15	AT5G54180	AT5G54180.1	N	10_PEP2	1_N	0.076	0.858324
RPOC2	ATCG00170	ATCG00170.1	C	10_PEP2	1_N	0.03	0.969038
RPOC1	ATCG00180	ATCG00180.1	C	10_PEP2	1_N	0.032	0.959705
RPOB	ATCG00190	ATCG00190.1	C	10_PEP2	1_N	0.081	0.856042
RPOA	ATCG00740	ATCG00740.1	C	10_PEP2	1_N	0.139	0.702719
WHY1-/PTAC1	AT1G14410	AT1G14410.1	N	10_PEP2	2_no_N	0.097	0.748892
PAP8/PTAC6	AT1G21600	AT1G21600.1	N	10_PEP2	2_no_N	-0.092	0.737032
PAP11/MURE-LIKE	AT1G63680	AT1G63680.2	N	10_PEP2	2_no_N	-0.424	0.0567876
PTAC4/VIPP1(HCF155)	AT1G65260	AT1G65260.2	N	10_PEP2	2_no_N	-0.322	0.0879032
FLN2	AT1G69200	AT1G69200.1	N	10_PEP2	2_no_N	-0.511	0.142163
PAP2/PTAC2	AT1G74850	AT1G74850.1	N	10_PEP2	2_no_N	-0.353	0.292037
PTAC17	AT1G80480	AT1G80480.1	N	10_PEP2	2_no_N	-0.16	0.515862
WHY3/PTAC11	AT2G02740	AT2G02740.1	N	10_PEP2	2_no_N	-0.185	0.552827
PTAC18	AT2G32180	AT2G32180.1	N	10_PEP2	2_no_N	-0.574	0.0274632
PAP5/PTAC12	AT2G34640	AT2G34640.1	N	10_PEP2	2_no_N	-0.606	0.030208
PAP1/PTAC3	AT3G04260	AT3G04260.1	N	10_PEP2	2_no_N	-0.611	0.00292751
PAP10/TRXZ	AT3G06730	AT3G06730.1	N	10_PEP2	2_no_N	-0.129	0.689286
PTAC13	AT3G09210	AT3G09210.1	N	10_PEP2	2_no_N	-0.469	0.0615736
DNAGYRASEB1/2	AT3G10270	AT3G10270.2	N	10_PEP2	2_no_N	-0.245	0.335129
DNAGYRASEA	AT3G10690	AT3G10690.1	N	10_PEP2	2_no_N	-0.157	0.613748
MFP1	AT3G16000	AT3G16000.1	N	10_PEP2	2_no_N	-0.85	3.79586e-05
POLIB/DNAPOLYMERASEI	AT3G20540	AT3G20540.1	N	10_PEP2	2_no_N	-0.282	0.202656
TCP34	AT3G26580	AT3G26580.1	N	10_PEP2	2_no_N	-0.02	0.948328
PTAC16	AT3G46780	AT3G46780.1	N	10_PEP2	2_no_N	-1.175	5.72704e-08
PAP3/PTAC10	AT3G48500	AT3G48500.1	N	10_PEP2	2_no_N	-0.403	0.154057
PEND	AT3G52170	AT3G52170.2	N	10_PEP2	2_no_N	-0.424	0.0804792
PAP6/FLN1	AT3G54090	AT3G54090.1	N	10_PEP2	2_no_N	-0.598	0.0101278
PTAC5	AT4G13670	AT4G13670.2	N	10_PEP2	2_no_N	-0.714	0.00401048
PTAC9	AT4G20010	AT4G20010.1	N	10_PEP2	2_no_N	-0.26	0.30964
PAP7/PTAC14	AT4G20130	AT4G20130.1	N	10_PEP2	2_no_N	-0.52	0.0103674
SIR/DCP68	AT5G04590	AT5G04590.1	N	10_PEP2	2_no_N	0.165	0.547343
CND41	AT5G10760	AT5G10760.1	N	10_PEP2	2_no_N	1.832	2.16735e-25
PAP4/FSD3	AT5G23310	AT5G23310.1	N	10_PEP2	2_no_N	-0.116	0.737629
PAP12/PTAC7	AT5G24314	AT5G24314.1	N	10_PEP2	2_no_N	-0.523	0.012232
PAP9/FSD2	AT5G51100	AT5G51100.2	N	10_PEP2	2_no_N	-0.475	0.0734111
PTAC15	AT5G54180	AT5G54180.1	N	10_PEP2	2_no_N	-0.764	0.00614637
RPOC2	ATCG00170	ATCG00170.1	C	10_PEP2	2_no_N	1.441	1.94605e-07
RPOC1	ATCG00180	ATCG00180.1	C	10_PEP2	2_no_N	1.224	8.03391e-11
RPOB	ATCG00190	ATCG00190.1	C	10_PEP2	2_no_N	1.214	1.80173e-08
RPOA	ATCG00740	ATCG00740.1	C	10_PEP2	2_no_N	1.433	2.9823e-13
WHY1-/PTAC1	AT1G14410	AT1G14410.1	N	10_PEP2	OXRSH1	-1.467	1.36248e-47
PAP8/PTAC6	AT1G21600	AT1G21600.1	N	10_PEP2	OXRSH1	-2.34	8.31412e-182
PAP11/MURE-LIKE	AT1G63680	AT1G63680.2	N	10_PEP2	OXRSH1	-2.849	2.20972e-211
PTAC4/VIPP1(HCF155)	AT1G65260	AT1G65260.2	N	10_PEP2	OXRSH1	-1.674	5.83453e-114
FLN2	AT1G69200	AT1G69200.1	N	10_PEP2	OXRSH1	-3.875	1.28601e-219
PAP2/PTAC2	AT1G74850	AT1G74850.1	N	10_PEP2	OXRSH1	-3.098	3.4282e-168
PTAC17	AT1G80480	AT1G80480.1	N	10_PEP2	OXRSH1	-1.997	1.54976e-135
WHY3/PTAC11	AT2G02740	AT2G02740.1	N	10_PEP2	OXRSH1	-2.082	2.38271e-91
PTAC18	AT2G32180	AT2G32180.1	N	10_PEP2	OXRSH1	-3.06	8.54186e-141
PAP5/PTAC12	AT2G34640	AT2G34640.1	N	10_PEP2	OXRSH1	-4.306	7.81495e-295
PAP1/PTAC3	AT3G04260	AT3G04260.1	N	10_PEP2	OXRSH1	-3.022	1.84004e-241
PAP10/TRXZ	AT3G06730	AT3G06730.1	N	10_PEP2	OXRSH1	-2.605	8.00582e-153
PTAC13	AT3G09210	AT3G09210.1	N	10_PEP2	OXRSH1	-3.779	0
DNAGYRASEB1/2	AT3G10270	AT3G10270.2	N	10_PEP2	OXRSH1	-1.8	5.58922e-88
DNAGYRASEA	AT3G10690	AT3G10690.1	N	10_PEP2	OXRSH1	-2.507	3.15183e-180
MFP1	AT3G16000	AT3G16000.1	N	10_PEP2	OXRSH1	-5.415	0
POLIB/DNAPOLYMERASEI	AT3G20540	AT3G20540.1	N	10_PEP2	OXRSH1	-0.974	1.19113e-34
TCP34	AT3G26580	AT3G26580.1	N	10_PEP2	OXRSH1	1.02	1.33504e-38
PTAC16	AT3G46780	AT3G46780.1	N	10_PEP2	OXRSH1	-7.7	0
PAP3/PTAC10	AT3G48500	AT3G48500.1	N	10_PEP2	OXRSH1	-3.356	2.6266e-215
PEND	AT3G52170	AT3G52170.2	N	10_PEP2	OXRSH1	-1.702	3.25013e-57
PAP6/FLN1	AT3G54090	AT3G54090.1	N	10_PEP2	OXRSH1	-3.653	5.04496e-293
PTAC5	AT4G13670	AT4G13670.2	N	10_PEP2	OXRSH1	-3.333	9.61022e-181
PTAC9	AT4G20010	AT4G20010.1	N	10_PEP2	OXRSH1	-0.864	2.51725e-17
PAP7/PTAC14	AT4G20130	AT4G20130.1	N	10_PEP2	OXRSH1	-3.148	2.47486e-266
SIR/DCP68	AT5G04590	AT5G04590.1	N	10_PEP2	OXRSH1	-1.008	3.29198e-28
CND41	AT5G10760	AT5G10760.1	N	10_PEP2	OXRSH1	6.563	0
PAP4/FSD3	AT5G23310	AT5G23310.1	N	10_PEP2	OXRSH1	-2.63	5.82875e-127
PAP12/PTAC7	AT5G24314	AT5G24314.1	N	10_PEP2	OXRSH1	-3.602	0
PAP9/FSD2	AT5G51100	AT5G51100.2	N	10_PEP2	OXRSH1	-2.771	1.70635e-136
PTAC15	AT5G54180	AT5G54180.1	N	10_PEP2	OXRSH1	-2.837	1.45492e-83
RPOC2	ATCG00170	ATCG00170.1	C	10_PEP2	OXRSH1	-2.946	9.67148e-111
RPOC1	ATCG00180	ATCG00180.1	C	10_PEP2	OXRSH1	-2.297	1.27877e-98
RPOB	ATCG00190	ATCG00190.1	C	10_PEP2	OXRSH1	-2.809	1.04105e-118
RPOA	ATCG00740	ATCG00740.1	C	10_PEP2	OXRSH1	-2.41	1.49657e-108
WHY1-/PTAC1	AT1G14410	AT1G14410.1	N	10_PEP2	WT	-1.498	1.23462e-27
PAP8/PTAC6	AT1G21600	AT1G21600.1	N	10_PEP2	WT	-2.239	1.18601e-51
PAP11/MURE-LIKE	AT1G63680	AT1G63680.2	N	10_PEP2	WT	-2.438	2.21563e-51
PTAC4/VIPP1(HCF155)	AT1G65260	AT1G65260.2	N	10_PEP2	WT	-1.403	6.32925e-26
FLN2	AT1G69200	AT1G69200.1	N	10_PEP2	WT	-3.404	2.98995e-74
PAP2/PTAC2	AT1G74850	AT1G74850.1	N	10_PEP2	WT	-2.814	8.80788e-52
PTAC17	AT1G80480	AT1G80480.1	N	10_PEP2	WT	-1.813	6.49072e-39
WHY3/PTAC11	AT2G02740	AT2G02740.1	N	10_PEP2	WT	-1.862	1.41903e-30
PTAC18	AT2G32180	AT2G32180.1	N	10_PEP2	WT	-2.333	1.25141e-54
PAP5/PTAC12	AT2G34640	AT2G34640.1	N	10_PEP2	WT	-3.745	8.05723e-110
PAP1/PTAC3	AT3G04260	AT3G04260.1	N	10_PEP2	WT	-2.396	1.38133e-52
PAP10/TRXZ	AT3G06730	AT3G06730.1	N	10_PEP2	WT	-2.457	2.68548e-60
PTAC13	AT3G09210	AT3G09210.1	N	10_PEP2	WT	-3.273	1.02171e-98
DNAGYRASEB1/2	AT3G10270	AT3G10270.2	N	10_PEP2	WT	-1.503	7.41059e-27
DNAGYRASEA	AT3G10690	AT3G10690.1	N	10_PEP2	WT	-2.479	3.88089e-46
MFP1	AT3G16000	AT3G16000.1	N	10_PEP2	WT	-4.592	1.25055e-124
POLIB/DNAPOLYMERASEI	AT3G20540	AT3G20540.1	N	10_PEP2	WT	-0.683	9.45031e-06
TCP34	AT3G26580	AT3G26580.1	N	10_PEP2	WT	0.961	8.00113e-13
PTAC16	AT3G46780	AT3G46780.1	N	10_PEP2	WT	-6.64	6.30278e-234
PAP3/PTAC10	AT3G48500	AT3G48500.1	N	10_PEP2	WT	-2.944	1.49413e-66
PEND	AT3G52170	AT3G52170.2	N	10_PEP2	WT	-1.27	5.20943e-17
PAP6/FLN1	AT3G54090	AT3G54090.1	N	10_PEP2	WT	-2.978	1.54343e-88
PTAC5	AT4G13670	AT4G13670.2	N	10_PEP2	WT	-2.72	2.72008e-63
PTAC9	AT4G20010	AT4G20010.1	N	10_PEP2	WT	-0.521	0.000945634
PAP7/PTAC14	AT4G20130	AT4G20130.1	N	10_PEP2	WT	-2.621	3.40915e-73
SIR/DCP68	AT5G04590	AT5G04590.1	N	10_PEP2	WT	-1.265	2.3293e-16
CND41	AT5G10760	AT5G10760.1	N	10_PEP2	WT	4.921	2.06654e-149
PAP4/FSD3	AT5G23310	AT5G23310.1	N	10_PEP2	WT	-2.641	1.68271e-78
PAP12/PTAC7	AT5G24314	AT5G24314.1	N	10_PEP2	WT	-3.025	2.62667e-99
PAP9/FSD2	AT5G51100	AT5G51100.2	N	10_PEP2	WT	-2.388	3.54233e-61
PTAC15	AT5G54180	AT5G54180.1	N	10_PEP2	WT	-1.995	2.72328e-36
RPOC2	ATCG00170	ATCG00170.1	C	10_PEP2	WT	-4.361	1.44263e-45
RPOC1	ATCG00180	ATCG00180.1	C	10_PEP2	WT	-3.485	1.21674e-55
RPOB	ATCG00190	ATCG00190.1	C	10_PEP2	WT	-3.941	1.43571e-58
RPOA	ATCG00740	ATCG00740.1	C	10_PEP2	WT	-3.699	2.63322e-69
RPL6	AT1G05190	AT1G05190.1	N	11_TRANSLATION	1_N	0.055	0.865822
RPL10ARELATED	AT1G06380	AT1G06380.1	N	11_TRANSLATION	1_N	0.285	0.660395
RPL4	AT1G07320	AT1G07320.1	N	11_TRANSLATION	1_N	0.031	0.93991
RPS8	AT1G16790	AT1G16790.1	N	11_TRANSLATION	1_N	0.175	0.820953
RPL34	AT1G29070	AT1G29070.1	N	11_TRANSLATION	1_N	0.025	0.956489
RPL11	AT1G32990	AT1G32990.1	N	11_TRANSLATION	1_N	0.064	0.853408
RPL21	AT1G35680	AT1G35680.1	N	11_TRANSLATION	1_N	0.034	0.938071
RPL18N	AT1G48350	AT1G48350.1	N	11_TRANSLATION	1_N	0.03	0.941773
RPS6	AT1G64510	AT1G64510.2	N	11_TRANSLATION	1_N	0.024	0.964824
PSRP-3	AT1G68590	AT1G68590.1	N	11_TRANSLATION	1_N	0.066	0.844297
RPS1	AT1G71720	AT1G71720.1	N	11_TRANSLATION	1_N	-0.218	0.496026
RPS9	AT1G74970	AT1G74970.1	N	11_TRANSLATION	1_N	-0.003	0.990872
RPL31	AT1G75350	AT1G75350.1	N	11_TRANSLATION	1_N	0.073	0.832326
RPL13A	AT1G78630	AT1G78630.1	N	11_TRANSLATION	1_N	-0.002	0.995637
RPS17	AT1G79850	AT1G79850.1	N	11_TRANSLATION	1_N	0.047	0.884798
RPL35	AT2G24090	AT2G24090.1	N	11_TRANSLATION	1_N	0.012	0.978725
RPL28	AT2G33450	AT2G33450.1	N	11_TRANSLATION	1_N	0.083	0.81282
RPS5	AT2G33800	AT2G33800.1	N	11_TRANSLATION	1_N	0.078	0.820953
PSRP-4	AT2G38140	AT2G38140.1	N	11_TRANSLATION	1_N	0.04	0.905247
RPL3-RELATED	AT2G43030	AT2G43030.1	N	11_TRANSLATION	1_N	0.029	0.952072
RPS10	AT3G13120	AT3G13120.1	N	11_TRANSLATION	1_N	0.044	0.893034
RPS20	AT3G15190	AT3G15190.1	N	11_TRANSLATION	1_N	0.024	0.96002
UL18-L4	AT3G20230	AT3G20230.1	N	11_TRANSLATION	1_N	-0.011	0.980939
RPS1	AT3G23700	AT3G23700.1	N	11_TRANSLATION	1_N	0.079	0.820953
RPL15	AT3G25920	AT3G25920.1	N	11_TRANSLATION	1_N	-0.007	0.987354
RPS21	AT3G27160	AT3G27160.1	N	11_TRANSLATION	1_N	0.058	0.856042
RPL12A	AT3G27830	AT3G27830.2	N	11_TRANSLATION	1_N	0.033	0.940546
RPL12B	AT3G27840	AT3G27840.2	N	11_TRANSLATION	1_N	0	1
RPL12C	AT3G27850	AT3G27850.1	N	11_TRANSLATION	1_N	0.048	0.892328
RPL9	AT3G44890	AT3G44890.1	N	11_TRANSLATION	1_N	-0.06	0.856042
PSRP-2	AT3G52150	AT3G52150.1	N	11_TRANSLATION	1_N	0.024	0.96287
RPL17	AT3G54210	AT3G54210.1	N	11_TRANSLATION	1_N	-0.02	0.971089
PSRP-5	AT3G56910	AT3G56910.1	N	11_TRANSLATION	1_N	0.007	0.985286
RPL1	AT3G63490	AT3G63490.1	N	11_TRANSLATION	1_N	0	0.999098
RPL5FAMILY	AT4G01310	AT4G01310.1	N	11_TRANSLATION	1_N	0.025	0.960236
RPL19	AT4G17560	AT4G17560.1	N	11_TRANSLATION	1_N	0.058	0.856042
EF-TU	AT4G20360	AT4G20360.1	N	11_TRANSLATION	1_N	0.033	0.951564
EMB2726	AT4G29060	AT4G29060.1	N	11_TRANSLATION	1_N	-0.093	0.81306
RPS16	AT4G34620	AT4G34620.1	N	11_TRANSLATION	1_N	0.103	0.778089
RPL10	AT5G13510	AT5G13510.1	N	11_TRANSLATION	1_N	-0.048	0.868298
NH12.19	AT5G13720	AT5G13720.1	N	11_TRANSLATION	1_N	0.027	0.9762
RPS13	AT5G14320	AT5G14320.1	N	11_TRANSLATION	1_N	0.086	0.81306
PSRP-3	AT5G15760	AT5G15760.1	N	11_TRANSLATION	1_N	0.009	0.990872
PSRP-6	AT5G17870	AT5G17870.2	N	11_TRANSLATION	1_N	0.09	0.78264
PSRP-1	AT5G24490	AT5G24490.1	N	11_TRANSLATION	1_N	0.172	0.33305
RPS1	AT5G30510	AT5G30510.1	N	11_TRANSLATION	1_N	0.074	0.820953
RPL27	AT5G40950	AT5G40950.1	N	11_TRANSLATION	1_N	0.023	0.9675
RPL19	AT5G47190	AT5G47190.1	N	11_TRANSLATION	1_N	-0.005	0.988682
RPL11	AT5G51610	AT5G51610.3	N	11_TRANSLATION	1_N	0	1
RPL24	AT5G54600	AT5G54600.1	N	11_TRANSLATION	1_N	0.011	0.98107
RPS21	AT5G63300	AT5G63300.1	N	11_TRANSLATION	1_N	-0.364	0.907605
RPL29	AT5G65220	AT5G65220.1	N	11_TRANSLATION	1_N	0.059	0.856042
RPS16	ATCG00050	ATCG00050.1	C	11_TRANSLATION	1_N	0.453	3.73832e-11
RPS16	ATCG00065	ATCG00065.1	C	11_TRANSLATION	1_N	0.092	0.782031
RPS12	ATCG00160	ATCG00160.1	C	11_TRANSLATION	1_N	0.062	0.856042
RPS14	ATCG00330	ATCG00330.1	C	11_TRANSLATION	1_N	0.2	0.617799
RPS4	ATCG00380	ATCG00380.1	C	11_TRANSLATION	1_N	0.232	0.107167
RPL33	ATCG00640	ATCG00640.1	C	11_TRANSLATION	1_N	0.318	6.70379e-05
RPS18	ATCG00650	ATCG00650.1	C	11_TRANSLATION	1_N	0.438	2.76799e-06
RPL20	ATCG00660	ATCG00660.1	C	11_TRANSLATION	1_N	0.199	0.152321
RPS11	ATCG00750	ATCG00750.1	C	11_TRANSLATION	1_N	0.093	0.820953
RPL36	ATCG00760	ATCG00760.1	C	11_TRANSLATION	1_N	0.211	0.1083
RPS8	ATCG00770	ATCG00770.1	C	11_TRANSLATION	1_N	0.199	0.283055
RPL14	ATCG00780	ATCG00780.1	C	11_TRANSLATION	1_N	0.216	0.266797
RPL16	ATCG00790	ATCG00790.1	C	11_TRANSLATION	1_N	0.175	0.534329
RPS3AN	ATCG00800	ATCG00800.1	C	11_TRANSLATION	1_N	0.219	0.293919
RPL22	ATCG00810	ATCG00810.1	C	11_TRANSLATION	1_N	0.176	0.461457
RPS19	ATCG00820	ATCG00820.1	C	11_TRANSLATION	1_N	0.237	0.0676411
RPL2.1	ATCG00830	ATCG00830.1	C	11_TRANSLATION	1_N	0.142	0.658915
RPL23.1	ATCG00840	ATCG00840.1	C	11_TRANSLATION	1_N	0.198	0.124008
RPS7.2	ATCG00900	ATCG00900.1	C	11_TRANSLATION	1_N	0.054	0.856042
RPS12C	ATCG00905	ATCG00905.1	C	11_TRANSLATION	1_N	0.033	0.934797
RPL32	ATCG01020	ATCG01020.1	C	11_TRANSLATION	1_N	0.514	2.77882e-10
RPS15	ATCG01120	ATCG01120.1	C	11_TRANSLATION	1_N	0.205	0.098612
RPS12B	ATCG01230	ATCG01230.1	C	11_TRANSLATION	1_N	0.029	0.945278
RPS7.1	ATCG01240	ATCG01240.1	C	11_TRANSLATION	1_N	0.014	0.978725
RPL23.2	ATCG01300	ATCG01300.1	C	11_TRANSLATION	1_N	0.168	0.273826
RPL2.2	ATCG01310	ATCG01310.1	C	11_TRANSLATION	1_N	0.137	0.668026
RPL6	AT1G05190	AT1G05190.1	N	11_TRANSLATION	2_no_N	-0.621	0.000211052
RPL10ARELATED	AT1G06380	AT1G06380.1	N	11_TRANSLATION	2_no_N	0.312	0.337157
RPL4	AT1G07320	AT1G07320.1	N	11_TRANSLATION	2_no_N	-0.637	0.00493626
RPS8	AT1G16790	AT1G16790.1	N	11_TRANSLATION	2_no_N	0.126	0.761371
RPL34	AT1G29070	AT1G29070.1	N	11_TRANSLATION	2_no_N	-0.354	0.173016
RPL11	AT1G32990	AT1G32990.1	N	11_TRANSLATION	2_no_N	-0.519	0.00415266
RPL21	AT1G35680	AT1G35680.1	N	11_TRANSLATION	2_no_N	-0.347	0.157756
RPL18N	AT1G48350	AT1G48350.1	N	11_TRANSLATION	2_no_N	-0.366	0.0803946
RPS6	AT1G64510	AT1G64510.2	N	11_TRANSLATION	2_no_N	-0.341	0.120106
PSRP-3	AT1G68590	AT1G68590.1	N	11_TRANSLATION	2_no_N	-0.588	0.00776137
RPS1	AT1G71720	AT1G71720.1	N	11_TRANSLATION	2_no_N	-1.135	0.0289593
RPS9	AT1G74970	AT1G74970.1	N	11_TRANSLATION	2_no_N	-0.409	0.0452737
RPL31	AT1G75350	AT1G75350.1	N	11_TRANSLATION	2_no_N	-0.241	0.299874
RPL13A	AT1G78630	AT1G78630.1	N	11_TRANSLATION	2_no_N	-0.605	0.000181172
RPS17	AT1G79850	AT1G79850.1	N	11_TRANSLATION	2_no_N	-0.298	0.127708
RPL35	AT2G24090	AT2G24090.1	N	11_TRANSLATION	2_no_N	-0.288	0.275174
RPL28	AT2G33450	AT2G33450.1	N	11_TRANSLATION	2_no_N	-0.552	0.00554673
RPS5	AT2G33800	AT2G33800.1	N	11_TRANSLATION	2_no_N	-0.315	0.138904
PSRP-4	AT2G38140	AT2G38140.1	N	11_TRANSLATION	2_no_N	-0.324	0.153371
RPL3-RELATED	AT2G43030	AT2G43030.1	N	11_TRANSLATION	2_no_N	-0.34	0.0614624
RPS10	AT3G13120	AT3G13120.1	N	11_TRANSLATION	2_no_N	-0.371	0.0978711
RPS20	AT3G15190	AT3G15190.1	N	11_TRANSLATION	2_no_N	-0.461	0.0094008
UL18-L4	AT3G20230	AT3G20230.1	N	11_TRANSLATION	2_no_N	-0.331	0.097042
RPS1	AT3G23700	AT3G23700.1	N	11_TRANSLATION	2_no_N	-0.894	4.36323e-05
RPL15	AT3G25920	AT3G25920.1	N	11_TRANSLATION	2_no_N	-0.578	0.00128937
RPS21	AT3G27160	AT3G27160.1	N	11_TRANSLATION	2_no_N	-0.272	0.347448
RPL12A	AT3G27830	AT3G27830.2	N	11_TRANSLATION	2_no_N	-0.456	0.0103854
RPL12B	AT3G27840	AT3G27840.2	N	11_TRANSLATION	2_no_N	0	1
RPL12C	AT3G27850	AT3G27850.1	N	11_TRANSLATION	2_no_N	-0.575	0.000657467
RPL9	AT3G44890	AT3G44890.1	N	11_TRANSLATION	2_no_N	-0.381	0.0432594
PSRP-2	AT3G52150	AT3G52150.1	N	11_TRANSLATION	2_no_N	-0.597	0.000847984
RPL17	AT3G54210	AT3G54210.1	N	11_TRANSLATION	2_no_N	-0.375	0.0502257
PSRP-5	AT3G56910	AT3G56910.1	N	11_TRANSLATION	2_no_N	-0.43	0.023907
RPL1	AT3G63490	AT3G63490.1	N	11_TRANSLATION	2_no_N	-0.421	0.0195078
RPL5FAMILY	AT4G01310	AT4G01310.1	N	11_TRANSLATION	2_no_N	-0.483	0.0104774
RPL19	AT4G17560	AT4G17560.1	N	11_TRANSLATION	2_no_N	-0.512	0.02011
EF-TU	AT4G20360	AT4G20360.1	N	11_TRANSLATION	2_no_N	-0.309	0.132895
EMB2726	AT4G29060	AT4G29060.1	N	11_TRANSLATION	2_no_N	-0.549	0.0120584
RPS16	AT4G34620	AT4G34620.1	N	11_TRANSLATION	2_no_N	-0.104	0.72747
RPL10	AT5G13510	AT5G13510.1	N	11_TRANSLATION	2_no_N	-0.447	0.0415888
NH12.19	AT5G13720	AT5G13720.1	N	11_TRANSLATION	2_no_N	-0.029	0.93479
RPS13	AT5G14320	AT5G14320.1	N	11_TRANSLATION	2_no_N	-0.412	0.0368563
PSRP-3	AT5G15760	AT5G15760.1	N	11_TRANSLATION	2_no_N	-0.31	0.456255
PSRP-6	AT5G17870	AT5G17870.2	N	11_TRANSLATION	2_no_N	-0.315	0.119671
PSRP-1	AT5G24490	AT5G24490.1	N	11_TRANSLATION	2_no_N	-0.72	0.0189638
RPS1	AT5G30510	AT5G30510.1	N	11_TRANSLATION	2_no_N	-0.395	0.0269145
RPL27	AT5G40950	AT5G40950.1	N	11_TRANSLATION	2_no_N	-0.361	0.0707186
RPL19	AT5G47190	AT5G47190.1	N	11_TRANSLATION	2_no_N	-0.366	0.0776139
RPL11	AT5G51610	AT5G51610.3	N	11_TRANSLATION	2_no_N	0	1
RPL24	AT5G54600	AT5G54600.1	N	11_TRANSLATION	2_no_N	-0.258	0.246916
RPS21	AT5G63300	AT5G63300.1	N	11_TRANSLATION	2_no_N	0.362	0.620117
RPL29	AT5G65220	AT5G65220.1	N	11_TRANSLATION	2_no_N	-0.342	0.126564
RPS16	ATCG00050	ATCG00050.1	C	11_TRANSLATION	2_no_N	2.095	1.99296e-40
RPS16	ATCG00065	ATCG00065.1	C	11_TRANSLATION	2_no_N	1.195	3.09377e-15
RPS12	ATCG00160	ATCG00160.1	C	11_TRANSLATION	2_no_N	1.458	1.58512e-13
RPS14	ATCG00330	ATCG00330.1	C	11_TRANSLATION	2_no_N	1.241	2.22533e-07
RPS4	ATCG00380	ATCG00380.1	C	11_TRANSLATION	2_no_N	1.738	4.23819e-28
RPL33	ATCG00640	ATCG00640.1	C	11_TRANSLATION	2_no_N	1.081	2.85928e-12
RPS18	ATCG00650	ATCG00650.1	C	11_TRANSLATION	2_no_N	1.334	2.86602e-11
RPL20	ATCG00660	ATCG00660.1	C	11_TRANSLATION	2_no_N	1.457	6.66313e-18
RPS11	ATCG00750	ATCG00750.1	C	11_TRANSLATION	2_no_N	1.35	1.70181e-12
RPL36	ATCG00760	ATCG00760.1	C	11_TRANSLATION	2_no_N	1.434	1.26832e-19
RPS8	ATCG00770	ATCG00770.1	C	11_TRANSLATION	2_no_N	1.358	1.02288e-12
RPL14	ATCG00780	ATCG00780.1	C	11_TRANSLATION	2_no_N	1.459	1.31593e-17
RPL16	ATCG00790	ATCG00790.1	C	11_TRANSLATION	2_no_N	1.307	3.23709e-15
RPS3AN	ATCG00800	ATCG00800.1	C	11_TRANSLATION	2_no_N	1.049	1.31341e-10
RPL22	ATCG00810	ATCG00810.1	C	11_TRANSLATION	2_no_N	1.051	1.1304e-11
RPS19	ATCG00820	ATCG00820.1	C	11_TRANSLATION	2_no_N	1.204	2.08244e-16
RPL2.1	ATCG00830	ATCG00830.1	C	11_TRANSLATION	2_no_N	1.159	3.96644e-15
RPL23.1	ATCG00840	ATCG00840.1	C	11_TRANSLATION	2_no_N	1.399	3.18861e-22
RPS7.2	ATCG00900	ATCG00900.1	C	11_TRANSLATION	2_no_N	1.242	9.06751e-19
RPS12C	ATCG00905	ATCG00905.1	C	11_TRANSLATION	2_no_N	1.256	9.4728e-18
RPL32	ATCG01020	ATCG01020.1	C	11_TRANSLATION	2_no_N	2.746	1.31907e-35
RPS15	ATCG01120	ATCG01120.1	C	11_TRANSLATION	2_no_N	1.75	1.8916e-31
RPS12B	ATCG01230	ATCG01230.1	C	11_TRANSLATION	2_no_N	1.239	2.45281e-17
RPS7.1	ATCG01240	ATCG01240.1	C	11_TRANSLATION	2_no_N	1.309	3.03659e-21
RPL23.2	ATCG01300	ATCG01300.1	C	11_TRANSLATION	2_no_N	1.35	3.04367e-22
RPL2.2	ATCG01310	ATCG01310.1	C	11_TRANSLATION	2_no_N	1.146	9.16153e-15
RPL6	AT1G05190	AT1G05190.1	N	11_TRANSLATION	OXRSH1	-3.718	0
RPL10ARELATED	AT1G06380	AT1G06380.1	N	11_TRANSLATION	OXRSH1	-0.22	0.168057
RPL4	AT1G07320	AT1G07320.1	N	11_TRANSLATION	OXRSH1	-5.38	0
RPS8	AT1G16790	AT1G16790.1	N	11_TRANSLATION	OXRSH1	-0.771	4.14645e-08
RPL34	AT1G29070	AT1G29070.1	N	11_TRANSLATION	OXRSH1	-4.858	0
RPL11	AT1G32990	AT1G32990.1	N	11_TRANSLATION	OXRSH1	-4.372	0
RPL21	AT1G35680	AT1G35680.1	N	11_TRANSLATION	OXRSH1	-4.407	0
RPL18N	AT1G48350	AT1G48350.1	N	11_TRANSLATION	OXRSH1	-4.054	0
RPS6	AT1G64510	AT1G64510.2	N	11_TRANSLATION	OXRSH1	-4.822	0
PSRP-3	AT1G68590	AT1G68590.1	N	11_TRANSLATION	OXRSH1	-4.972	0
RPS1	AT1G71720	AT1G71720.1	N	11_TRANSLATION	OXRSH1	-4.968	2.47113e-149
RPS9	AT1G74970	AT1G74970.1	N	11_TRANSLATION	OXRSH1	-3.466	0
RPL31	AT1G75350	AT1G75350.1	N	11_TRANSLATION	OXRSH1	-3.438	0
RPL13A	AT1G78630	AT1G78630.1	N	11_TRANSLATION	OXRSH1	-4.766	0
RPS17	AT1G79850	AT1G79850.1	N	11_TRANSLATION	OXRSH1	-3.793	0
RPL35	AT2G24090	AT2G24090.1	N	11_TRANSLATION	OXRSH1	-3.98	0
RPL28	AT2G33450	AT2G33450.1	N	11_TRANSLATION	OXRSH1	-4.507	0
RPS5	AT2G33800	AT2G33800.1	N	11_TRANSLATION	OXRSH1	-4.151	0
PSRP-4	AT2G38140	AT2G38140.1	N	11_TRANSLATION	OXRSH1	-3.803	0
RPL3-RELATED	AT2G43030	AT2G43030.1	N	11_TRANSLATION	OXRSH1	-4.139	0
RPS10	AT3G13120	AT3G13120.1	N	11_TRANSLATION	OXRSH1	-4.359	0
RPS20	AT3G15190	AT3G15190.1	N	11_TRANSLATION	OXRSH1	-4.037	0
UL18-L4	AT3G20230	AT3G20230.1	N	11_TRANSLATION	OXRSH1	-2.029	1.0912e-127
RPS1	AT3G23700	AT3G23700.1	N	11_TRANSLATION	OXRSH1	-5.074	0
RPL15	AT3G25920	AT3G25920.1	N	11_TRANSLATION	OXRSH1	-5.404	0
RPS21	AT3G27160	AT3G27160.1	N	11_TRANSLATION	OXRSH1	-4.978	0
RPL12A	AT3G27830	AT3G27830.2	N	11_TRANSLATION	OXRSH1	-4.264	0
RPL12B	AT3G27840	AT3G27840.2	N	11_TRANSLATION	OXRSH1	0	1
RPL12C	AT3G27850	AT3G27850.1	N	11_TRANSLATION	OXRSH1	-4.123	0
RPL9	AT3G44890	AT3G44890.1	N	11_TRANSLATION	OXRSH1	-3.823	0
PSRP-2	AT3G52150	AT3G52150.1	N	11_TRANSLATION	OXRSH1	-4.571	0
RPL17	AT3G54210	AT3G54210.1	N	11_TRANSLATION	OXRSH1	-4.225	0
PSRP-5	AT3G56910	AT3G56910.1	N	11_TRANSLATION	OXRSH1	-3.954	0
RPL1	AT3G63490	AT3G63490.1	N	11_TRANSLATION	OXRSH1	-3.381	0
RPL5FAMILY	AT4G01310	AT4G01310.1	N	11_TRANSLATION	OXRSH1	-4.812	0
RPL19	AT4G17560	AT4G17560.1	N	11_TRANSLATION	OXRSH1	-4.284	0
EF-TU	AT4G20360	AT4G20360.1	N	11_TRANSLATION	OXRSH1	-3.557	1.63759e-222
EMB2726	AT4G29060	AT4G29060.1	N	11_TRANSLATION	OXRSH1	-5.135	0
RPS16	AT4G34620	AT4G34620.1	N	11_TRANSLATION	OXRSH1	-3.29	2.85031e-253
RPL10	AT5G13510	AT5G13510.1	N	11_TRANSLATION	OXRSH1	-4.223	0
NH12.19	AT5G13720	AT5G13720.1	N	11_TRANSLATION	OXRSH1	-0.546	2.26322e-08
RPS13	AT5G14320	AT5G14320.1	N	11_TRANSLATION	OXRSH1	-3.982	0
PSRP-3	AT5G15760	AT5G15760.1	N	11_TRANSLATION	OXRSH1	-0.991	0.000115193
PSRP-6	AT5G17870	AT5G17870.2	N	11_TRANSLATION	OXRSH1	-2.878	5.25321e-283
PSRP-1	AT5G24490	AT5G24490.1	N	11_TRANSLATION	OXRSH1	-6.923	0
RPS1	AT5G30510	AT5G30510.1	N	11_TRANSLATION	OXRSH1	-2.783	5.39993e-203
RPL27	AT5G40950	AT5G40950.1	N	11_TRANSLATION	OXRSH1	-4.033	0
RPL19	AT5G47190	AT5G47190.1	N	11_TRANSLATION	OXRSH1	-3.922	0
RPL11	AT5G51610	AT5G51610.3	N	11_TRANSLATION	OXRSH1	0	1
RPL24	AT5G54600	AT5G54600.1	N	11_TRANSLATION	OXRSH1	-3.165	1.1467e-269
RPS21	AT5G63300	AT5G63300.1	N	11_TRANSLATION	OXRSH1	1.798	8.513e-05
RPL29	AT5G65220	AT5G65220.1	N	11_TRANSLATION	OXRSH1	-2.953	3.28155e-254
RPS16	ATCG00050	ATCG00050.1	C	11_TRANSLATION	OXRSH1	-1.693	2.06164e-101
RPS16	ATCG00065	ATCG00065.1	C	11_TRANSLATION	OXRSH1	-0.458	1.35262e-08
RPS12	ATCG00160	ATCG00160.1	C	11_TRANSLATION	OXRSH1	-2.86	1.59321e-174
RPS14	ATCG00330	ATCG00330.1	C	11_TRANSLATION	OXRSH1	-1.539	2.55682e-22
RPS4	ATCG00380	ATCG00380.1	C	11_TRANSLATION	OXRSH1	-1.436	3.95977e-38
RPL33	ATCG00640	ATCG00640.1	C	11_TRANSLATION	OXRSH1	-2.532	1.32292e-178
RPS18	ATCG00650	ATCG00650.1	C	11_TRANSLATION	OXRSH1	-2.138	3.92555e-59
RPL20	ATCG00660	ATCG00660.1	C	11_TRANSLATION	OXRSH1	-0.423	1.73838e-05
RPS11	ATCG00750	ATCG00750.1	C	11_TRANSLATION	OXRSH1	-2.647	1.44058e-147
RPL36	ATCG00760	ATCG00760.1	C	11_TRANSLATION	OXRSH1	-2.742	2.14319e-228
RPS8	ATCG00770	ATCG00770.1	C	11_TRANSLATION	OXRSH1	-2.902	2.1494e-169
RPL14	ATCG00780	ATCG00780.1	C	11_TRANSLATION	OXRSH1	-3.194	6.59783e-157
RPL16	ATCG00790	ATCG00790.1	C	11_TRANSLATION	OXRSH1	-3.255	1.58652e-162
RPS3AN	ATCG00800	ATCG00800.1	C	11_TRANSLATION	OXRSH1	-2.991	1.71459e-140
RPL22	ATCG00810	ATCG00810.1	C	11_TRANSLATION	OXRSH1	-3.113	1.4315e-182
RPS19	ATCG00820	ATCG00820.1	C	11_TRANSLATION	OXRSH1	-2.819	6.89478e-170
RPL2.1	ATCG00830	ATCG00830.1	C	11_TRANSLATION	OXRSH1	-2.368	2.49516e-113
RPL23.1	ATCG00840	ATCG00840.1	C	11_TRANSLATION	OXRSH1	-2.818	3.11048e-236
RPS7.2	ATCG00900	ATCG00900.1	C	11_TRANSLATION	OXRSH1	-1.191	1.82443e-56
RPS12C	ATCG00905	ATCG00905.1	C	11_TRANSLATION	OXRSH1	-1.192	8.20835e-52
RPL32	ATCG01020	ATCG01020.1	C	11_TRANSLATION	OXRSH1	-0.156	0.310465
RPS15	ATCG01120	ATCG01120.1	C	11_TRANSLATION	OXRSH1	-1.983	2.18526e-159
RPS12B	ATCG01230	ATCG01230.1	C	11_TRANSLATION	OXRSH1	-1.218	1.90649e-55
RPS7.1	ATCG01240	ATCG01240.1	C	11_TRANSLATION	OXRSH1	-1.157	1.24075e-44
RPL23.2	ATCG01300	ATCG01300.1	C	11_TRANSLATION	OXRSH1	-2.81	1.00272e-217
RPL2.2	ATCG01310	ATCG01310.1	C	11_TRANSLATION	OXRSH1	-2.353	2.16815e-114
RPL6	AT1G05190	AT1G05190.1	N	11_TRANSLATION	WT	-3.037	3.80557e-79
RPL10ARELATED	AT1G06380	AT1G06380.1	N	11_TRANSLATION	WT	-0.228	0.292853
RPL4	AT1G07320	AT1G07320.1	N	11_TRANSLATION	WT	-4.706	7.34679e-168
RPS8	AT1G16790	AT1G16790.1	N	11_TRANSLATION	WT	-0.709	0.000245835
RPL34	AT1G29070	AT1G29070.1	N	11_TRANSLATION	WT	-4.474	1.2123e-147
RPL11	AT1G32990	AT1G32990.1	N	11_TRANSLATION	WT	-3.784	2.57872e-145
RPL21	AT1G35680	AT1G35680.1	N	11_TRANSLATION	WT	-4.021	1.52074e-139
RPL18N	AT1G48350	AT1G48350.1	N	11_TRANSLATION	WT	-3.654	1.55568e-136
RPS6	AT1G64510	AT1G64510.2	N	11_TRANSLATION	WT	-4.454	6.56744e-180
PSRP-3	AT1G68590	AT1G68590.1	N	11_TRANSLATION	WT	-4.315	7.52073e-158
RPS1	AT1G71720	AT1G71720.1	N	11_TRANSLATION	WT	-4.023	5.21533e-77
RPS9	AT1G74970	AT1G74970.1	N	11_TRANSLATION	WT	-3.055	1.20229e-97
RPL31	AT1G75350	AT1G75350.1	N	11_TRANSLATION	WT	-3.119	1.06346e-84
RPL13A	AT1G78630	AT1G78630.1	N	11_TRANSLATION	WT	-4.16	3.27645e-148
RPS17	AT1G79850	AT1G79850.1	N	11_TRANSLATION	WT	-3.443	1.56557e-118
RPL35	AT2G24090	AT2G24090.1	N	11_TRANSLATION	WT	-3.678	4.73974e-133
RPL28	AT2G33450	AT2G33450.1	N	11_TRANSLATION	WT	-3.868	2.40162e-135
RPS5	AT2G33800	AT2G33800.1	N	11_TRANSLATION	WT	-3.755	5.6705e-119
PSRP-4	AT2G38140	AT2G38140.1	N	11_TRANSLATION	WT	-3.435	4.29635e-127
RPL3-RELATED	AT2G43030	AT2G43030.1	N	11_TRANSLATION	WT	-3.766	3.76759e-120
RPS10	AT3G13120	AT3G13120.1	N	11_TRANSLATION	WT	-3.94	3.16889e-132
RPS20	AT3G15190	AT3G15190.1	N	11_TRANSLATION	WT	-3.549	5.14842e-132
UL18-L4	AT3G20230	AT3G20230.1	N	11_TRANSLATION	WT	-1.704	1.98648e-36
RPS1	AT3G23700	AT3G23700.1	N	11_TRANSLATION	WT	-4.114	8.86002e-115
RPL15	AT3G25920	AT3G25920.1	N	11_TRANSLATION	WT	-4.828	4.63403e-170
RPS21	AT3G27160	AT3G27160.1	N	11_TRANSLATION	WT	-4.643	2.95399e-158
RPL12A	AT3G27830	AT3G27830.2	N	11_TRANSLATION	WT	-3.773	1.99718e-133
RPL12B	AT3G27840	AT3G27840.2	N	11_TRANSLATION	WT	0	1
RPL12C	AT3G27850	AT3G27850.1	N	11_TRANSLATION	WT	-3.497	1.06338e-116
RPL9	AT3G44890	AT3G44890.1	N	11_TRANSLATION	WT	-3.498	3.56469e-125
PSRP-2	AT3G52150	AT3G52150.1	N	11_TRANSLATION	WT	-3.95	8.40986e-141
RPL17	AT3G54210	AT3G54210.1	N	11_TRANSLATION	WT	-3.867	1.12389e-147
PSRP-5	AT3G56910	AT3G56910.1	N	11_TRANSLATION	WT	-3.511	6.4837e-116
RPL1	AT3G63490	AT3G63490.1	N	11_TRANSLATION	WT	-2.956	4.90641e-84
RPL5FAMILY	AT4G01310	AT4G01310.1	N	11_TRANSLATION	WT	-4.301	2.76107e-148
RPL19	AT4G17560	AT4G17560.1	N	11_TRANSLATION	WT	-3.713	8.85021e-120
EF-TU	AT4G20360	AT4G20360.1	N	11_TRANSLATION	WT	-3.21	1.09189e-75
EMB2726	AT4G29060	AT4G29060.1	N	11_TRANSLATION	WT	-4.681	3.47715e-128
RPS16	AT4G34620	AT4G34620.1	N	11_TRANSLATION	WT	-3.078	1.81996e-75
RPL10	AT5G13510	AT5G13510.1	N	11_TRANSLATION	WT	-3.819	2.68944e-143
NH12.19	AT5G13720	AT5G13720.1	N	11_TRANSLATION	WT	-0.481	0.00103703
RPS13	AT5G14320	AT5G14320.1	N	11_TRANSLATION	WT	-3.48	8.19628e-113
PSRP-3	AT5G15760	AT5G15760.1	N	11_TRANSLATION	WT	-0.676	0.00908542
PSRP-6	AT5G17870	AT5G17870.2	N	11_TRANSLATION	WT	-2.468	2.41901e-72
PSRP-1	AT5G24490	AT5G24490.1	N	11_TRANSLATION	WT	-6.027	4.60018e-189
RPS1	AT5G30510	AT5G30510.1	N	11_TRANSLATION	WT	-2.309	6.34565e-56
RPL27	AT5G40950	AT5G40950.1	N	11_TRANSLATION	WT	-3.645	2.0083e-117
RPL19	AT5G47190	AT5G47190.1	N	11_TRANSLATION	WT	-3.558	1.74002e-133
RPL11	AT5G51610	AT5G51610.3	N	11_TRANSLATION	WT	0	1
RPL24	AT5G54600	AT5G54600.1	N	11_TRANSLATION	WT	-2.892	2.77062e-74
RPS21	AT5G63300	AT5G63300.1	N	11_TRANSLATION	WT	1.041	0.0436036
RPL29	AT5G65220	AT5G65220.1	N	11_TRANSLATION	WT	-2.546	1.6678e-59
RPS16	ATCG00050	ATCG00050.1	C	11_TRANSLATION	WT	-3.325	6.92795e-111
RPS16	ATCG00065	ATCG00065.1	C	11_TRANSLATION	WT	-1.555	5.68764e-26
RPS12	ATCG00160	ATCG00160.1	C	11_TRANSLATION	WT	-4.254	5.24733e-77
RPS14	ATCG00330	ATCG00330.1	C	11_TRANSLATION	WT	-2.576	1.17415e-25
RPS4	ATCG00380	ATCG00380.1	C	11_TRANSLATION	WT	-2.937	4.94044e-63
RPL33	ATCG00640	ATCG00640.1	C	11_TRANSLATION	WT	-3.289	9.08151e-104
RPS18	ATCG00650	ATCG00650.1	C	11_TRANSLATION	WT	-3.027	8.47999e-96
RPL20	ATCG00660	ATCG00660.1	C	11_TRANSLATION	WT	-1.676	8.31635e-26
RPS11	ATCG00750	ATCG00750.1	C	11_TRANSLATION	WT	-3.9	2.87484e-72
RPL36	ATCG00760	ATCG00760.1	C	11_TRANSLATION	WT	-3.96	4.79795e-92
RPS8	ATCG00770	ATCG00770.1	C	11_TRANSLATION	WT	-4.056	6.57121e-78
RPL14	ATCG00780	ATCG00780.1	C	11_TRANSLATION	WT	-4.433	3.19235e-86
RPL16	ATCG00790	ATCG00790.1	C	11_TRANSLATION	WT	-4.383	4.36954e-94
RPS3AN	ATCG00800	ATCG00800.1	C	11_TRANSLATION	WT	-3.817	4.67399e-81
RPL22	ATCG00810	ATCG00810.1	C	11_TRANSLATION	WT	-3.983	5.50364e-99
RPS19	ATCG00820	ATCG00820.1	C	11_TRANSLATION	WT	-3.781	8.58114e-109
RPL2.1	ATCG00830	ATCG00830.1	C	11_TRANSLATION	WT	-3.38	1.40943e-85
RPL23.1	ATCG00840	ATCG00840.1	C	11_TRANSLATION	WT	-4.014	1.62623e-125
RPS7.2	ATCG00900	ATCG00900.1	C	11_TRANSLATION	WT	-2.375	2.51618e-59
RPS12C	ATCG00905	ATCG00905.1	C	11_TRANSLATION	WT	-2.411	4.11067e-56
RPL32	ATCG01020	ATCG01020.1	C	11_TRANSLATION	WT	-2.382	1.4572e-45
RPS15	ATCG01120	ATCG01120.1	C	11_TRANSLATION	WT	-3.521	3.60989e-96
RPS12B	ATCG01230	ATCG01230.1	C	11_TRANSLATION	WT	-2.421	5.14645e-53
RPS7.1	ATCG01240	ATCG01240.1	C	11_TRANSLATION	WT	-2.449	8.4393e-59
RPL23.2	ATCG01300	ATCG01300.1	C	11_TRANSLATION	WT	-3.988	9.02518e-130
RPL2.2	ATCG01310	ATCG01310.1	C	11_TRANSLATION	WT	-3.356	1.92898e-84
TIC110	AT1G06950	At1g06950.1	N	12_TIC extended	1_N	-0.022	0.972337
FTSH12	AT1G79560	At1g79560.1	N	12_TIC extended	1_N	-0.027	0.964822
TIC55	AT2G24820	At2g24820.1	N	12_TIC extended	1_N	-0.034	0.941773
FTSHI5	AT3G04340	At3g04340.1	N	12_TIC extended	1_N	-0.083	0.820953
FTSHI2	AT3G16290	At3g16290.1	N	12_TIC extended	1_N	-0.125	0.666568
TIC62	AT3G18890	At3g18890.1	N	12_TIC extended	1_N	-0.202	0.107167
TIC22-III	AT3G23710	At3g23710.1	N	12_TIC extended	1_N	0.231	0.572858
PDNAD-MDH	AT3G47520	At3g47520.1	N	12_TIC extended	1_N	-0.043	0.894217
FTSHI1	AT4G23940	At4g23940.1	N	12_TIC extended	1_N	-0.07	0.856042
TIC22-IV	AT4G33350	At4g33350.1	N	12_TIC extended	1_N	-0.005	0.989771
TIC56	AT5G01590	At5g01590.1	N	12_TIC extended	1_N	-0.052	0.856417
TIC40	AT5G16620	At5g16620.1	N	12_TIC extended	1_N	-0.064	0.856042
TIC100	AT5G22640	At5g22640.1	N	12_TIC extended	1_N	0	1
FTSHI4	AT5G64580	At5g64580.1	N	12_TIC extended	1_N	-0.041	0.908289
YCF2	ATCG00860	AtCg00860.1	C	12_TIC extended	1_N	0.233	0.231979
TIC214/YCF1	ATCG01000	AtCg01000.1	C	12_TIC extended	1_N	0.181	0.304506
TIC214/YCF1	ATCG01130	AtCg01130.1	C	12_TIC extended	1_N	0.263	0.145823
YCF2	ATCG01280	AtCg01280.1	C	12_TIC extended	1_N	0.248	0.179828
TIC110	AT1G06950	At1g06950.1	N	12_TIC extended	2_no_N	-0.212	0.387096
FTSH12	AT1G79560	At1g79560.1	N	12_TIC extended	2_no_N	-0.255	0.408966
TIC55	AT2G24820	At2g24820.1	N	12_TIC extended	2_no_N	0.085	0.762373
FTSHI5	AT3G04340	At3g04340.1	N	12_TIC extended	2_no_N	-0.454	0.0839032
FTSHI2	AT3G16290	At3g16290.1	N	12_TIC extended	2_no_N	-0.262	0.420071
TIC62	AT3G18890	At3g18890.1	N	12_TIC extended	2_no_N	-0.638	0.0120597
TIC22-III	AT3G23710	At3g23710.1	N	12_TIC extended	2_no_N	-0.151	0.623134
PDNAD-MDH	AT3G47520	At3g47520.1	N	12_TIC extended	2_no_N	0.032	0.921954
FTSHI1	AT4G23940	At4g23940.1	N	12_TIC extended	2_no_N	-0.466	0.0418326
TIC22-IV	AT4G33350	At4g33350.1	N	12_TIC extended	2_no_N	-0.119	0.653544
TIC56	AT5G01590	At5g01590.1	N	12_TIC extended	2_no_N	-0.329	0.12836
TIC40	AT5G16620	At5g16620.1	N	12_TIC extended	2_no_N	-0.173	0.54052
TIC100	AT5G22640	At5g22640.1	N	12_TIC extended	2_no_N	0	1
FTSHI4	AT5G64580	At5g64580.1	N	12_TIC extended	2_no_N	-0.393	0.0934474
YCF2	ATCG00860	AtCg00860.1	C	12_TIC extended	2_no_N	1.639	5.58333e-17
TIC214/YCF1	ATCG01000	AtCg01000.1	C	12_TIC extended	2_no_N	1.413	1.47565e-23
TIC214/YCF1	ATCG01130	AtCg01130.1	C	12_TIC extended	2_no_N	1.713	1.26832e-19
YCF2	ATCG01280	AtCg01280.1	C	12_TIC extended	2_no_N	1.668	7.85383e-18
TIC110	AT1G06950	At1g06950.1	N	12_TIC extended	OXRSH1	-2.738	6.70758e-230
FTSH12	AT1G79560	At1g79560.1	N	12_TIC extended	OXRSH1	-2.34	3.08608e-111
TIC55	AT2G24820	At2g24820.1	N	12_TIC extended	OXRSH1	-0.419	1.46622e-08
FTSHI5	AT3G04340	At3g04340.1	N	12_TIC extended	OXRSH1	-2.955	1.68411e-186
FTSHI2	AT3G16290	At3g16290.1	N	12_TIC extended	OXRSH1	-2.913	1.03113e-213
TIC62	AT3G18890	At3g18890.1	N	12_TIC extended	OXRSH1	-5.44	0
TIC22-III	AT3G23710	At3g23710.1	N	12_TIC extended	OXRSH1	-0.785	2.59529e-10
PDNAD-MDH	AT3G47520	At3g47520.1	N	12_TIC extended	OXRSH1	-1.492	2.32869e-92
FTSHI1	AT4G23940	At4g23940.1	N	12_TIC extended	OXRSH1	-3.219	5.11919e-232
TIC22-IV	AT4G33350	At4g33350.1	N	12_TIC extended	OXRSH1	-1.498	7.05e-51
TIC56	AT5G01590	At5g01590.1	N	12_TIC extended	OXRSH1	-3.172	1.99526e-280
TIC40	AT5G16620	At5g16620.1	N	12_TIC extended	OXRSH1	-2.13	1.79439e-155
TIC100	AT5G22640	At5g22640.1	N	12_TIC extended	OXRSH1	0	1
FTSHI4	AT5G64580	At5g64580.1	N	12_TIC extended	OXRSH1	-3.196	4.37804e-280
YCF2	ATCG00860	AtCg00860.1	C	12_TIC extended	OXRSH1	-2.208	1.87295e-68
TIC214/YCF1	ATCG01000	AtCg01000.1	C	12_TIC extended	OXRSH1	-2.293	3.44194e-179
TIC214/YCF1	ATCG01130	AtCg01130.1	C	12_TIC extended	OXRSH1	-2.206	2.03989e-69
YCF2	ATCG01280	AtCg01280.1	C	12_TIC extended	OXRSH1	-2.195	2.41501e-67
TIC110	AT1G06950	At1g06950.1	N	12_TIC extended	WT	-2.543	2.37827e-54
FTSH12	AT1G79560	At1g79560.1	N	12_TIC extended	WT	-2.109	1.0943e-34
TIC55	AT2G24820	At2g24820.1	N	12_TIC extended	WT	-0.536	5.56652e-05
FTSHI5	AT3G04340	At3g04340.1	N	12_TIC extended	WT	-2.584	1.78548e-45
FTSHI2	AT3G16290	At3g16290.1	N	12_TIC extended	WT	-2.775	2.80199e-66
TIC62	AT3G18890	At3g18890.1	N	12_TIC extended	WT	-5.014	6.2651e-152
TIC22-III	AT3G23710	At3g23710.1	N	12_TIC extended	WT	-0.391	0.0264525
PDNAD-MDH	AT3G47520	At3g47520.1	N	12_TIC extended	WT	-1.562	3.97096e-32
FTSHI1	AT4G23940	At4g23940.1	N	12_TIC extended	WT	-2.818	2.61584e-68
TIC22-IV	AT4G33350	At4g33350.1	N	12_TIC extended	WT	-1.38	2.3625e-22
TIC56	AT5G01590	At5g01590.1	N	12_TIC extended	WT	-2.892	5.35057e-88
TIC40	AT5G16620	At5g16620.1	N	12_TIC extended	WT	-2.016	8.71073e-36
TIC100	AT5G22640	At5g22640.1	N	12_TIC extended	WT	0	1
FTSHI4	AT5G64580	At5g64580.1	N	12_TIC extended	WT	-2.841	2.05386e-72
YCF2	ATCG00860	AtCg00860.1	C	12_TIC extended	WT	-3.61	1.30226e-55
TIC214/YCF1	ATCG01000	AtCg01000.1	C	12_TIC extended	WT	-3.52	8.47916e-126
TIC214/YCF1	ATCG01130	AtCg01130.1	C	12_TIC extended	WT	-3.651	8.41229e-78
YCF2	ATCG01280	AtCg01280.1	C	12_TIC extended	WT	-3.611	4.47168e-56
