# Supplementary material for: A guanosine tetraphosphate (ppGpp) mediated brake on photosynthesis is required for acclimation to nitrogen limitation in Arabidopsis
Source: eLife. 2022 Feb 14;11:e75041. doi: 10.7554/eLife.75041 (PMC8887892; doi:10.7554/eLife.75041)
Supplement: Figure 4—source data 1. [file elife-75041-fig4-data1.xlsx]

## Sheet: Info
Figure 4-source data 1
Differentially accumulating transcripts from RNA-seq experiment.

## Sheet: WT-N vs WT+N
Id				wt_ms2_1	wt_ms2_2	wt_ms2_3	wt_n50_1	wt_n50_2	wt_n50_3	norm.wt_ms2_1	norm.wt_ms2_2	norm.wt_ms2_3	norm.wt_n50_1	norm.wt_n50_2	norm.wt_n50_3	baseMean	WTMS2	WTN50	FC	log2FoldChange	pvalue	padj	tagwise.dispersion	trended.dispersion
AT5G45890.1	protein_coding	SAG12, AtSAG12	senescence-associated gene 12	0	0	0	14603	9276	13929	0	0	0	10120	10257	13626	5667.2	0	11334	91099.5	16.475	0	0	0.0152	0.0142
AT5G19470.2	protein_coding	NUDX24, atnudt24, NUDT24	nudix hydrolase homolog 24	0	0	0	3092	1098	1427	0	0	0	2143	1214	1396	792.15	0	1584	12435.2	13.602	5.6096e-256	5.81134e-253	0.0132	0.0139
AT4G31380.1	protein_coding	FLP1	FPF1-like protein 1	0	0	0	357	330	404	0	0	0	247	365	395	167.92	0	336	2723.5	11.411	1.29032e-98	5.339e-97	0.0235	0.0203
AT2G47190.1	protein_coding	MYB2, ATMYB2	myb domain protein 2, MYB DOMAIN PROTEIN 2	0	1	0	1137	1450	1652	0	1	0	788	1603	1616	668.08	0	1336	2704	11.401	1.33812e-238	1.1342e-235	0.0131	0.0144
AT3G28510.1	protein_coding	-	-	0	0	0	408	277	358	0	0	0	283	306	350	156.54	0	313	2517.23	11.298	2.0347e-94	7.63927e-93	0.0242	0.0209
AT4G20370.1	protein_coding	TSF	TWIN SISTER OF FT	0	0	0	297	260	368	0	0	0	206	287	360	142.22	0	284	2307.07	11.172	4.88217e-87	1.5361e-85	0.0257	0.0219
AT2G36760.1	protein_coding	UGT73C2	UDP-glucosyl transferase 73C2	0	0	0	354	206	261	0	0	0	245	228	255	121.41	0	243	1941.79	10.923	8.21565e-77	2.05729e-75	0.0288	0.0238
AT1G66390.1	protein_coding	ATMYB90, MYB90, PAP2	myb domain protein 90, PRODUCTION OF ANTHOCYANIN PIGMENT 2	9	6	2	10674	9721	11767	11	6	2	7397	10749	11511	4946.25	6	9886	1488.86	10.54	0	0	0.0165	0.0138
AT1G07500.1	protein_coding	SMR5	SIAMESE-RELATED 5	0	0	0	233	163	191	0	0	0	161	180	187	88.09	0	176	1416.42	10.468	1.50083e-60	2.69965e-59	0.0342	0.0296
AT4G24000.1	protein_coding	ATCSLG2, CSLG2	cellulose synthase like G2, ARABIDOPSIS THALIANA CELLULOSE SYNTHASE LIKE G2	4	9	1	9207	6198	7637	5	10	1	6381	6853	7471	3453.48	5	6902	1273.04	10.314	0	0	0.0145	0.013
AT2G29470.1	protein_coding	ATGSTU3, GSTU3, GST21	GLUTATHIONE S-TRANSFERASE 21, glutathione S-transferase tau 3	0	0	0	53	292	99	0	0	0	37	323	97	76.08	0	152	1264.88	10.305	6.45154e-47	8.29683e-46	0.0387	0.0346
AT5G03210.2	protein_coding	DIP2, AtDIP2	DBP-interacting protein 2	2	0	2	2094	1337	2044	3	0	2	1451	1478	2000	822.31	2	1643	1003.25	9.97	3.1484e-253	3.03669e-250	0.0132	0.0138
AT3G21305.1	protein_coding	-	-	0	0	0	68	136	128	0	0	0	47	150	125	53.79	0	107	885.929	9.791	2.9506e-39	3.10501e-38	0.0478	0.0461
AT3G48640.2	protein_coding	-	-	0	0	0	59	99	127	0	0	0	41	109	124	45.77	0	91	752.764	9.556	6.30379e-35	5.91292e-34	0.0519	0.0531
AT1G12940.1	protein_coding	ATNRT2.5, NRT2.5	nitrate transporter2.5	0	4	2	1989	1614	2189	0	4	2	1378	1785	2141	885.16	2	1768	746.063	9.543	1.56337e-259	1.68188e-256	0.013	0.0136
AT3G24290.1	protein_coding	AMT1;5	ammonium transporter 1;5	0	0	0	114	60	103	0	0	0	79	66	101	41.02	0	82	657.512	9.361	3.40044e-33	3.0291e-32	0.0541	0.0565
AT2G23270.1	protein_coding	-	-	0	0	0	34	101	95	0	0	0	24	112	93	38.03	0	76	629.889	9.299	3.49153e-29	2.73562e-28	0.0597	0.0636
AT3G21520.1	protein_coding	AtDMP1, DMP1	Arabidopsis thaliana DUF679 domain membrane protein 1, DUF679 domain membrane protein 1	0	0	2	616	543	587	0	0	2	427	600	574	267.29	1	534	610.883	9.255	1.34101e-134	1.14011e-132	0.0183	0.0173
AT3G62610.1	protein_coding	ATMYB11, PFG2, MYB11	myb domain protein 11, PRODUCTION OF FLAVONOL GLYCOSIDES 2	0	0	0	129	70	63	0	0	0	89	77	62	38.07	0	76	604.873	9.24	3.24379e-31	2.71328e-30	0.057	0.0599
AT3G19615.1	protein_coding	-	-	0	0	0	50	94	76	0	0	0	35	104	74	35.49	0	71	583.397	9.188	2.25351e-28	1.71238e-27	0.0623	0.0668
AT1G32350.1	protein_coding	AOX1D	alternative oxidase 1D	6	0	1	1374	1829	1948	8	0	1	952	2022	1906	814.83	3	1627	578.678	9.177	1.61253e-225	8.67386e-223	0.0147	0.0138
AT1G59670.1	protein_coding	ATGSTU15, GSTU15	glutathione S-transferase TAU 15	0	1	0	329	301	306	0	1	0	228	333	299	143.54	0	287	575.931	9.17	6.59967e-86	2.03752e-84	0.0254	0.0218
AT5G39520.1	protein_coding	-	-	4	7	11	5667	4558	5533	5	8	12	3927	5040	5413	2400.78	8	4793	573.055	9.163	0	0	0.0129	0.0126
AT1G03050.1	protein_coding	-	-	0	0	0	118	50	77	0	0	0	82	55	75	35.4	0	71	562.195	9.135	2.25674e-29	1.77913e-28	0.06	0.0635
AT1G34060.1	protein_coding	-	-	19	21	20	16786	11823	13660	24	23	22	11633	13073	13363	6356.32	23	12690	553.422	9.112	0	0	0.0147	0.0145
AT5G66816.1	protein_coding	-	-	0	1	0	303	256	332	0	1	0	210	283	325	136.49	0	273	546.693	9.095	3.82749e-82	1.07705e-80	0.0264	0.0224
AT1G14880.1	protein_coding	PCR1, AtPCR1	PLANT CADMIUM RESISTANCE 1	0	2	1	502	696	918	0	2	1	348	770	898	336.46	1	672	545.586	9.092	2.83715e-157	3.81528e-155	0.0157	0.0164
AT3G48850.1	protein_coding	MPT2, PHT3;2	phosphate transporter 3;2, mitochondrial phosphate transporter 2	2	0	1	761	576	840	3	0	1	527	637	822	331.61	1	662	525.791	9.038	2.7527e-158	3.88867e-156	0.0159	0.0164
AT1G80133.1	protein_coding	AtEPFL8		0	0	0	57	52	93	0	0	0	40	57	91	31.33	0	63	510.285	8.995	3.30345e-26	2.33867e-25	0.066	0.0729
AT2G45570.1	protein_coding	CYP76C2	"cytochrome P450, family 76, subfamily C, polypeptide 2"	1	5	8	3256	2625	3002	1	5	9	2256	2903	2937	1351.86	5	2699	504.038	8.977	3.17004e-287	5.91129e-284	0.0131	0.0128
AT1G56600.1	protein_coding	GolS2, AtGolS2	galactinol synthase 2	7	1	5	4154	2364	2195	9	1	5	2879	2614	2147	1275.92	5	2547	498.677	8.962	3.84738e-278	5.66394e-275	0.0134	0.0129
AT3G50610.2	protein_coding	-	-	6	2	0	1703	1518	1837	8	2	0	1180	1679	1797	777.6	3	1552	488.088	8.931	2.9265e-227	1.67055e-224	0.0144	0.014
AT3G21500.3	protein_coding	DXPS1, DXS2, DXL1	DXS-like 1, 1-deoxy-D-xylulose 5-phosphate synthase 1, 1-deoxy-D-xylulose 5-phosphate (DXP) synthase 2	17	5	1	4708	3724	4988	22	5	1	3263	4118	4880	2048.03	9	4087	459.739	8.845	7.94559e-147	8.74985e-145	0.0338	0.0125
AT1G55230.1	protein_coding	-	-	0	0	0	46	68	55	0	0	0	32	75	54	26.81	0	54	438.755	8.777	2.68141e-23	1.72457e-22	0.0723	0.084
AT2G06185.1	lncRNA			0	0	0	42	50	78	0	0	0	29	55	76	26.78	0	53	438.339	8.776	3.40402e-23	2.1808e-22	0.0721	0.0837
AT5G42610.1	protein_coding	-	-	0	1	1	379	362	372	0	1	1	263	400	364	171.5	1	342	392.868	8.618	8.45544e-97	3.33578e-95	0.0229	0.0201
AT3G15536.1	ncRNA		Unknown gene	0	0	0	49	52	44	0	0	0	34	57	43	22.42	0	45	364.187	8.509	9.06538e-21	5.27936e-20	0.0779	0.0956
AT5G64810.1	protein_coding	ATWRKY51, WRKY51	WRKY DNA-binding protein 51, ARABIDOPSIS THALIANA WRKY DNA-BINDING PROTEIN 51	1	0	0	178	187	222	1	0	0	123	207	217	91.43	0	182	363.37	8.505	5.20833e-59	8.95404e-58	0.0338	0.029
AT5G16570.1	protein_coding	GLN1;4	glutamine synthetase 1;4	20	25	42	15165	10805	12374	25	27	46	10510	11948	12105	5776.74	33	11521	353.192	8.464	1.9746823342582e-313	5.52338395715361e-310	0.0159	0.0142
AT5G36130.1	protein_coding	-	-	0	0	1	244	147	190	0	0	1	169	163	186	86.43	0	173	343.025	8.422	2.13483e-57	3.55014e-56	0.0345	0.0299
AT3G09525.1	lncRNA			0	0	0	61	28	56	0	0	0	42	31	55	21.34	0	43	341.681	8.417	5.50174e-20	3.10868e-19	0.0793	0.0967
AT5G59310.1	protein_coding	LTP4	lipid transfer protein 4	4	0	5	2418	928	969	5	0	5	1676	1026	948	610.06	3	1217	336.347	8.394	1.85415e-213	7.62681e-211	0.0135	0.0146
AT2G19900.1	protein_coding	ATNADP-ME1, NADP-ME1	NADP-malic enzyme 1, Arabidopsis thaliana NADP-malic enzyme 1	6	11	5	4563	2363	2760	8	12	5	3162	2613	2700	1416.67	8	2825	331.186	8.371	1.15424e-279	2.01783e-276	0.0133	0.0128
AT5G15500.1	protein_coding	-	-	1	2	3	1474	636	667	1	2	3	1022	703	652	397.33	2	792	323.535	8.338	2.84997e-177	5.90493e-175	0.0142	0.0158
AT1G66570.2	protein_coding	ATSUC7, SUC7	sucrose-proton symporter 7	0	1	0	101	200	160	0	1	0	70	221	157	74.79	0	149	306.387	8.259	5.75301e-49	7.82673e-48	0.0386	0.0345
AT2G14560.3	protein_coding	LURP1	LATE UPREGULATED IN RESPONSE TO HYALOPERONOSPORA PARASITICA	14	27	27	7907	8130	8914	18	29	30	5480	8990	8720	3877.66	26	7730	302.253	8.24	0	0	0.013	0.0132
AT2G06065.1	lncRNA			0	0	0	36	29	55	0	0	0	25	32	54	18.47	0	37	300.34	8.23	1.3031e-17	6.70019e-17	0.0889	0.11
AT3G25795.1	ncRNA		other RNA	0	0	4	508	369	618	0	0	4	352	408	605	228.17	1	455	284.211	8.151	1.29948e-113	7.15507e-112	0.0206	0.0181
AT5G38250.1	protein_coding	-	-	0	0	0	35	35	36	0	0	0	24	39	35	16.36	0	33	266.159	8.056	3.52574e-16	1.69273e-15	0.0968	0.1201
AT2G47880.1	protein_coding	-	-	15	25	30	8906	6788	7331	19	27	33	6172	7506	7172	3488.03	26	6950	263.286	8.04	0	0	0.0131	0.013
AT5G52720.2	protein_coding	-	-	0	0	0	13	40	42	0	0	0	9	44	41	15.72	0	31	260.523	8.025	8.44451e-15	3.78771e-14	0.1026	0.1275
AT3G48020.1	protein_coding	-	-	5	3	7	1595	1425	1605	6	3	8	1105	1576	1570	711.4	6	1417	244.724	7.935	1.75881e-224	9.28221e-222	0.0132	0.0142
AT5G02580.1	protein_coding	-	-	12	16	1	3122	2431	3300	15	17	1	2164	2688	3228	1352.25	11	2693	241.087	7.913	9.18332e-195	2.62109e-192	0.02	0.0128
AT1G67980.1	protein_coding	CCOAMT	caffeoyl-CoA 3-O-methyltransferase	0	0	0	16	42	30	0	0	0	11	46	29	14.48	0	29	239.109	7.902	5.07701e-14	2.18442e-13	0.1081	0.1343
AT1G71520.1	protein_coding	-	-	0	0	0	17	39	31	0	0	0	12	43	30	14.21	0	28	234.35	7.873	6.12698e-14	2.6289e-13	0.1091	0.1354
AT3G22840.1	protein_coding	ELIP1, ELIP	EARLY LIGHT-INDUCABLE PROTEIN	66	64	51	26981	11563	16959	84	69	56	18698	12786	16590	8047.16	70	16025	229.426	7.842	5.76037e-289	1.23941e-285	0.0167	0.0154
AT5G50800.1	protein_coding	AtSWEET13, SWEET13		25	21	10	7211	4121	4924	32	23	11	4997	4557	4817	2406.07	22	4790	223.9	7.807	2.28924e-270	3.20162e-267	0.0152	0.0126
AT1G47890.1	protein_coding	AtRLP7, RLP7	receptor like protein 7	3	1	1	591	401	480	4	1	1	410	443	470	221.42	2	441	217.372	7.764	3.61872e-111	1.8849e-109	0.0206	0.0182
AT5G36150.1	protein_coding	PEN3, ATPEN3	putative pentacyclic triterpene synthase 3	1	0	1	289	136	230	1	0	1	200	150	225	96.34	1	192	216.563	7.759	5.52165e-61	1.00682e-59	0.0319	0.0276
AT1G62225.1	protein_coding	-	-	0	0	0	22	31	28	0	0	0	15	34	27	12.82	0	25	210.049	7.715	3.19453e-13	1.31771e-12	0.1148	0.1423
AT1G07430.1	protein_coding	HAI2, HON, AtAIP1, AIP1	highly ABA-induced PP2C gene 2, HONSU (Korean for abnormal drowsiness), AKT1 interacting protein phosphatase 1	3	2	1	963	351	471	4	2	1	667	388	461	253.89	2	505	206.716	7.692	2.58819e-124	1.80986e-122	0.0182	0.0175
AT5G25390.2	protein_coding	SHN3	shine3	0	0	1	165	83	108	0	0	1	114	92	106	52.14	0	104	205.478	7.683	8.77742e-38	8.87611e-37	0.0475	0.0455
AT2G33080.1	protein_coding	RLP28, AtRLP28	receptor like protein 28	0	0	0	38	28	19	0	0	0	26	31	19	12.65	0	25	202.99	7.665	2.70019e-13	1.11776e-12	0.1119	0.1396
AT1G48000.1	protein_coding	MYB112, AtMYB112	myb domain protein 112	3	2	1	568	458	567	4	2	1	394	506	555	243.63	2	485	201.904	7.658	2.91972e-119	1.81081e-117	0.0192	0.0177
AT4G13480.1	protein_coding	MYB79, AtMYB79	myb domain protein 79	0	0	0	28	23	27	0	0	0	19	25	26	11.87	0	23	192.664	7.59	1.11276e-12	4.46749e-12	0.1187	0.1464
AT2G18660.1	protein_coding	AtPNP-A, PNP-A	plant natriuretic peptide A	5	15	8	1415	2174	2400	6	16	9	981	2404	2348	960.59	10	1911	181.517	7.504	1.84176e-236	1.39232e-233	0.013	0.0135
AT1G74810.2	protein_coding	BOR5	REQUIRES HIGH BORON 5	34	51	47	16027	7201	8523	43	55	51	11107	7963	8338	4592.78	50	9136	179.465	7.488	1.79834e-279	2.95891e-276	0.0156	0.0136
AT3G12910.1	protein_coding	-	-	0	0	0	24	15	34	0	0	0	17	17	33	11.08	0	22	179.554	7.488	8.83369e-12	3.38012e-11	0.1254	0.1522
AT4G04500.3	protein_coding	CRK37	cysteine-rich RLK (RECEPTOR-like protein kinase) 37	0	1	0	118	100	68	0	1	0	82	111	67	43.32	0	87	173.628	7.44	1.73721e-32	1.51046e-31	0.0526	0.0544
AT4G18980.1	protein_coding	AtS40-3	AtS40-3	0	2	3	267	340	436	0	2	3	185	376	427	165.49	2	329	167.906	7.392	4.31273e-88	1.41089e-86	0.0235	0.0204
AT1G56650.1	protein_coding	AtPAP1, SIAA1, PAP1, MYB75, ATMYB75	Arabidopsis thaliana production of anthocyanin pigment 1, SUC-INDUCED ANTHOCYANIN ACCUMULATION 1, MYB DOMAIN PROTEIN 75, MYELOBLASTOSIS PROTEIN 75, production of anthocyanin pigment 1	18	24	16	5427	3481	3568	23	26	17	3761	3849	3490	1861.13	22	3700	167.166	7.385	9.35598e-289	1.86926e-285	0.0125	0.0125
AT5G52740.2	protein_coding	-	-	1	0	4	303	363	365	1	0	4	210	401	357	162.35	2	323	162.042	7.34	1.12243e-84	3.37584e-83	0.025	0.0206
AT3G60140.2	protein_coding	SRG2, DIN2, BGLU30	DARK INDUCIBLE 2, SENESCENCE-RELATED GENE 2, BETA GLUCOSIDASE 30	3	1	4	632	622	432	4	1	4	438	688	423	259.61	3	516	161.947	7.339	8.74079e-120	5.49412e-118	0.019	0.0174
AT1G69500.1	protein_coding	CYP704B1	"cytochrome P450, family 704, subfamily B, polypeptide 1"	0	0	0	15	22	24	0	0	0	10	24	23	9.7	0	19	159.414	7.317	1.16109e-10	4.15891e-10	0.1378	0.1673
AT1G66700.3	protein_coding	PXMT1		6	3	5	718	1097	902	8	3	5	498	1213	882	434.89	5	864	157.724	7.301	4.20358e-166	7.2134e-164	0.0148	0.0156
AT1G63950.2	protein_coding	-	-	0	0	1	67	85	94	0	0	1	46	94	92	38.91	0	77	157.48	7.299	4.34204e-29	3.38681e-28	0.0582	0.0609
AT1G70080.1	protein_coding	-	-	0	0	1	90	74	91	0	0	1	62	82	89	39.05	0	78	156.664	7.292	8.63501e-30	6.90085e-29	0.0568	0.0598
AT2G29350.2	protein_coding	SAG13	senescence-associated gene 13	15	10	11	2487	1774	2954	19	11	12	1724	1962	2890	1102.8	14	2192	156.748	7.292	8.07779e-232	5.13509e-229	0.014	0.0132
AT5G52730.1	protein_coding	-	-	0	0	0	21	20	21	0	0	0	15	22	21	9.54	0	19	155.299	7.279	1.07756e-10	3.86961e-10	0.1378	0.1664
AT2G21780.1	protein_coding	-	-	0	0	0	13	20	26	0	0	0	9	22	25	9.43	0	19	155.158	7.278	2.22652e-10	7.84853e-10	0.1402	0.1701
AT2G30300.1	protein_coding	-	-	0	0	0	38	11	21	0	0	0	26	12	21	9.84	0	20	155.218	7.278	7.12828e-11	2.58572e-10	0.1302	0.1574
AT1G05880.3	protein_coding	ARI12, ATARI12	ARIADNE 12, ARABIDOPSIS ARIADNE 12	0	0	0	9	22	26	0	0	0	6	24	25	9.33	0	18	154.424	7.271	4.55779e-10	1.57701e-09	0.1437	0.1727
AT5G22380.1	protein_coding	NAC090, anac090	NAC domain containing protein 90	0	0	0	19	24	17	0	0	0	13	27	17	9.39	0	19	153.307	7.26	1.75063e-10	6.20304e-10	0.1391	0.1691
AT4G12350.1	protein_coding	AtMYB42, MYB42	myb domain protein 42	1	0	0	88	59	108	1	0	0	61	65	106	38.86	0	77	152.469	7.252	3.8719e-29	3.02516e-28	0.0574	0.0599
AT5G48410.2	protein_coding	ATGLR1.3, GLR1.3	ARABIDOPSIS THALIANA GLUTAMATE RECEPTOR 1.3, glutamate receptor 1.3	0	10	4	1129	710	906	0	11	4	782	785	886	411.49	5	818	152.27	7.25	6.51982e-158	9.11829e-156	0.0162	0.0158
AT3G13433.1	protein_coding	-	-	0	0	0	17	20	22	0	0	0	12	22	22	9.24	0	19	151.229	7.241	2.16285e-10	7.63561e-10	0.1405	0.1705
AT1G19630.2	protein_coding	CYP722A1	"cytochrome P450, family 722, subfamily A, polypeptide 1"	10	29	16	4199	2702	3115	13	31	17	2910	2988	3047	1501.06	20	2982	144.293	7.173	4.54786e-236	3.34758e-233	0.0149	0.0127
AT5G01225.1	protein_coding	-	-	0	1	0	80	60	91	0	1	0	55	66	89	35.31	0	70	140.729	7.137	3.79645e-27	2.77115e-26	0.0611	0.0652
AT4G11910.1	protein_coding	NYE2, SGR2	STAY-GREEN 2, NONYELLOWING 2	8	9	12	1731	1420	1820	10	10	13	1200	1570	1780	763.86	11	1517	137.057	7.099	6.16461e-222	2.92255e-219	0.0127	0.014
AT2G23830.1	protein_coding	PVA31		0	0	0	15	17	21	0	0	0	10	19	21	8.29	0	17	135.805	7.085	1.40974e-09	4.71616e-09	0.1506	0.18
AT4G09600.1	protein_coding	GASA3	GAST1 protein homolog 3	0	0	0	37	16	8	0	0	0	26	18	8	8.53	0	17	133.489	7.061	1.29439e-09	4.34223e-09	0.1409	0.1696
AT3G62990.1	protein_coding	-	-	0	0	0	23	14	18	0	0	0	16	15	18	8.17	0	16	131.846	7.043	1.30429e-09	4.37437e-09	0.1487	0.1776
AT3G60966.1	protein_coding	-	-	2	0	2	162	250	252	3	0	2	112	276	247	106.66	2	212	128.771	7.009	6.25387e-60	1.10364e-58	0.0319	0.0262
AT4G12735.1	protein_coding	-	-	4	2	12	591	892	1220	5	2	13	410	986	1193	434.96	7	863	127.184	6.991	1.04196e-158	1.4946e-156	0.0152	0.0156
AT5G38800.1	protein_coding	AtbZIP43, bZIP43	basic leucine-zipper 43	0	0	2	147	99	120	0	0	2	102	109	117	55.15	1	109	125.561	6.972	9.66876e-38	9.77041e-37	0.0469	0.0437
AT4G32810.1	protein_coding	CCD8, ATCCD8, MAX4	carotenoid cleavage dioxygenase 8, MORE AXILLARY BRANCHING 4	12	9	24	2734	1945	2359	15	10	26	1895	2151	2308	1067.38	17	2118	124.668	6.962	2.56817e-224	1.30608e-221	0.014	0.0132
AT5G22300.2	protein_coding	AtNIT4, NIT4	nitrilase 4, NITRILASE 4	73	141	94	17958	13483	15623	93	152	103	12445	14909	15283	7164.1	116	14212	124.029	6.955	1.05296e-255	1.05187e-252	0.0164	0.0149
AT1G62580.1	protein_coding	NOGC1	nitric oxide-dependent guanylate cyclase 1	10	10	7	1727	1144	1436	13	11	8	1197	1265	1405	649.62	11	1289	123.899	6.953	2.25957e-207	8.31613e-205	0.0129	0.0144
AT5G40990.1	protein_coding	GLIP1	GDSL lipase 1	0	0	1	61	55	78	0	0	1	42	61	76	30.08	0	60	121.612	6.926	5.97593e-24	3.92654e-23	0.0663	0.0753
AT3G12220.1	protein_coding	scpl16	serine carboxypeptidase-like 16	0	2	0	112	122	100	0	2	0	78	135	98	52.08	1	104	121.077	6.92	1.20973e-35	1.15604e-34	0.049	0.0466
AT3G13950.1	protein_coding	-	-	12	10	11	1117	2018	1763	15	11	12	774	2231	1725	794.7	13	1577	121.088	6.92	3.4149e-181	7.64145e-179	0.0161	0.0139
AT1G70720.2	protein_coding	-	-	0	0	0	14	11	23	0	0	0	10	12	22	7.39	0	15	120.584	6.914	9.33129e-09	2.95824e-08	0.1594	0.1889
AT1G04580.1	protein_coding	AO4, AAO4, ATAO2, ATAO-4	ALDEHYDE OXIDASE 2, arabdopsis thaliana aldehyde oxidase 4, aldehyde oxidase 4	2	0	1	233	119	168	3	0	1	161	132	164	76.84	1	152	120.211	6.909	1.05927e-48	1.42653e-47	0.0374	0.0327
AT1G70680.1	protein_coding	-	-	0	0	1	71	66	59	0	0	1	49	73	58	30.17	0	60	120.143	6.909	5.03135e-24	3.3168e-23	0.0663	0.0749
AT5G67310.1	protein_coding	CYP81G1	"cytochrome P450, family 81, subfamily G, polypeptide 1"	7	3	0	472	481	595	9	3	0	327	532	582	242.2	4	480	120.115	6.908	8.37576e-97	3.30902e-95	0.0245	0.0178
AT1G26390.1	protein_coding	AtBBE4		0	1	0	126	57	34	0	1	0	87	63	33	30.78	0	61	119.246	6.898	6.93053e-24	4.53884e-23	0.0645	0.0708
AT1G78360.1	protein_coding	GSTU21, ATGSTU21	glutathione S-transferase TAU 21	0	0	0	28	9	16	0	0	0	19	10	16	7.5	0	15	118.898	6.894	5.87181e-09	1.88782e-08	0.1526	0.1816
AT1G64360.1	protein_coding	-	-	13	9	23	2112	1912	2419	17	10	25	1464	2114	2366	999.27	17	1981	116.295	6.862	9.53135e-216	4.16565e-213	0.0141	0.0134
AT3G62960.1	protein_coding	-	-	6	13	15	1838	1443	1605	8	14	16	1274	1596	1570	746.25	13	1480	115.063	6.846	4.76457e-214	1.9891e-211	0.0129	0.0141
AT5G22570.1	protein_coding	WRKY38, ATWRKY38	WRKY DNA-binding protein 38, ARABIDOPSIS THALIANA WRKY DNA-BINDING PROTEIN 38	6	6	2	648	678	678	8	6	2	449	750	663	313.05	5	621	114.286	6.837	2.99424e-134	2.52264e-132	0.0168	0.0167
AT5G63225.1	protein_coding	-	-	0	0	0	8	14	21	0	0	0	6	15	21	6.93	0	14	114.359	6.837	3.01002e-08	9.20043e-08	0.1668	0.1978
AT4G11070.1	protein_coding	WRKY41, AtWRKY41		0	0	0	18	17	11	0	0	0	12	19	11	7.01	0	14	113.626	6.828	1.48707e-08	4.64816e-08	0.1615	0.1929
AT4G04090.1	protein_coding	-	-	0	0	0	9	15	18	0	0	0	6	17	18	6.74	0	14	111.191	6.797	3.64992e-08	1.10861e-07	0.1695	0.1999
AT5G04120.1	protein_coding	-	-	5	12	2	1122	567	1095	6	13	2	778	627	1071	416.19	7	825	110.231	6.784	1.75616e-135	1.55448e-133	0.019	0.0157
AT3G51171.1	protein_coding	-	-	0	0	0	19	9	18	0	0	0	13	10	18	6.79	0	14	109.4	6.773	2.18035e-08	6.73362e-08	0.1621	0.1932
AT2G29460.1	protein_coding	GST22, GSTU4, ATGSTU4	GLUTATHIONE S-TRANSFERASE 22, glutathione S-transferase tau 4	41	35	18	3599	4525	4671	52	38	20	2494	5004	4569	2029.44	37	4022	109.189	6.771	4.28544e-101	1.87881e-99	0.0389	0.0125
AT1G62262.1	protein_coding	SLAH4	SLAC1 homologue 4	13	12	3	1415	1115	1287	17	13	3	981	1233	1259	584.21	11	1158	107.285	6.745	5.20408e-167	9.15493e-165	0.0164	0.0147
AT5G52760.1	protein_coding	-	-	7	3	5	513	721	728	9	3	5	356	797	712	313.76	6	622	105.404	6.72	2.1824e-125	1.56925e-123	0.018	0.0167
AT4G35190.1	protein_coding	LOG5	LONELY GUY 5	2	2	3	382	289	297	3	2	3	265	320	291	147.14	3	292	105.093	6.716	1.74385e-80	4.70823e-79	0.0242	0.0215
AT4G35180.2	protein_coding	LHT7	LYS/HIS transporter 7	16	21	12	2092	2066	2220	20	23	13	1450	2284	2172	993.68	19	1969	105.048	6.715	6.38325e-217	2.92698e-214	0.0137	0.0134
AT1G63245.1	protein_coding	CLE14	CLAVATA3/ESR-RELATED 14	1	2	0	140	126	156	1	2	0	97	139	153	65.4	1	130	103.446	6.693	2.79842e-42	3.19489e-41	0.0413	0.038
AT1G54575.2	protein_coding	-	-	95	151	114	14637	13759	17603	121	162	125	10144	15214	17220	7164.31	136	14193	102.875	6.685	5.4128e-228	3.1542e-225	0.0176	0.0149
AT2G32830.1	protein_coding	PHT5, PHT1;5	phosphate transporter 1;5, PHOSPHATE TRANSPORTER 5	6	1	6	714	478	548	8	1	7	495	529	536	262.45	5	520	102.591	6.681	5.93747e-115	3.37555e-113	0.0193	0.0174
AT5G09930.1	protein_coding	ABCF2	ATP-binding cassette F2	0	0	0	33	8	8	0	0	0	23	9	8	6.59	0	13	101.762	6.669	6.36374e-08	1.90232e-07	0.1619	0.1891
AT2G21900.1	protein_coding	ATWRKY59, WRKY59	WRKY DNA-binding protein 59	3	0	0	125	155	134	4	0	0	87	171	131	65.49	1	130	100.595	6.652	4.8735e-39	5.10358e-38	0.0469	0.0383
AT5G17220.1	protein_coding	GSTF12, GST26, TT19, ATGSTF12	glutathione S-transferase phi 12, GLUTATHIONE S-TRANSFERASE 26, ARABIDOPSIS THALIANA GLUTATHIONE S-TRANSFERASE PHI 12, TRANSPARENT TESTA 19	109	121	70	15619	9969	11994	139	130	76	10824	11023	11733	5654.35	115	11193	99.056	6.63	4.0524e-195	1.18073e-192	0.0204	0.0141
AT1G67160.1	protein_coding	-	-	0	0	0	16	15	9	0	0	0	11	17	9	6.08	0	12	98.593	6.623	1.00192e-07	2.94748e-07	0.1746	0.205
AT4G18990.1	protein_coding	XTH29	xyloglucan endotransglucosylase/hydrolase 29	2	0	4	257	246	255	3	0	4	178	272	249	117.75	2	233	97.659	6.61	3.81673e-63	7.30217e-62	0.0309	0.0244
AT1G61700.1	protein_coding	-	-	0	0	0	14	13	12	0	0	0	10	14	12	5.97	0	12	97.362	6.605	1.15593e-07	3.3895e-07	0.1787	0.207
AT1G69930.1	protein_coding	GSTU11, ATGSTU11	glutathione S-transferase TAU 11	3	1	0	133	214	162	4	1	0	92	237	158	82.03	2	162	97.34	6.605	4.62153e-46	5.8308e-45	0.0398	0.0318
AT1G72540.1	protein_coding	-	-	5	5	7	673	706	673	6	5	8	466	781	658	320.8	6	635	96.967	6.599	7.19335e-139	6.86707e-137	0.0156	0.0166
AT5G46610.3	protein_coding	-	-	0	0	0	22	2	20	0	0	0	15	2	20	6.17	0	12	96.867	6.598	2.38057e-07	6.82242e-07	0.1671	0.1977
AT5G11930.1	protein_coding	-	-	5	6	10	1097	731	783	6	6	11	760	808	766	393.04	8	778	96.28	6.589	1.90629e-159	2.8212e-157	0.0143	0.0159
AT5G39120.1	protein_coding	-	-	4	0	1	158	229	240	5	0	1	109	253	235	100.61	2	199	95.665	6.58	1.43335e-51	2.06662e-50	0.0377	0.0272
AT4G23310.2	protein_coding	CRK23	cysteine-rich RLK (RECEPTOR-like protein kinase) 23	0	0	0	18	11	11	0	0	0	12	12	11	5.9	0	12	95.145	6.572	1.21199e-07	3.54721e-07	0.1762	0.2053
AT5G36140.1	protein_coding	CYP716A2	"cytochrome P450, family 716, subfamily A, polypeptide 2"	4	2	2	430	244	344	5	2	2	298	270	337	152.29	3	302	94.832	6.567	4.44759e-80	1.18592e-78	0.0244	0.0211
AT1G19250.1	protein_coding	FMO1	flavin-dependent monooxygenase 1	4	8	4	492	855	454	5	9	4	341	945	444	291.43	6	577	93.957	6.554	2.69732e-125	1.92466e-123	0.0165	0.017
AT1G72570.1	protein_coding	-	-	0	0	0	6	7	23	0	0	0	4	8	22	5.73	0	11	93.695	6.55	6.04327e-07	1.67845e-06	0.1873	0.2132
AT4G05030.2	protein_coding	-	-	0	0	0	17	11	11	0	0	0	12	12	11	5.78	0	12	93.483	6.547	1.56333e-07	4.53984e-07	0.1791	0.2074
AT2G20150.1	protein_coding	-	-	0	0	0	6	11	18	0	0	0	4	12	18	5.65	0	11	93.43	6.546	4.41411e-07	1.23851e-06	0.1906	0.2155
AT1G61800.2	protein_coding	ATGPT2, GPT2	ARABIDOPSIS GLUCOSE-6-PHOSPHATE/PHOSPHATE TRANSLOCATOR 2, glucose-6-phosphate/phosphate translocator 2	273	443	325	55689	29385	36119	348	476	355	38594	32493	35334	17933.1	393	35474	90.776	6.504	6.0122e-185	1.44972e-182	0.0219	0.0191
AT3G44870.1	protein_coding	-	-	0	0	0	11	14	10	0	0	0	8	15	10	5.48	0	11	89.823	6.489	3.96331e-07	1.1165e-06	0.1909	0.216
AT1G69480.2	protein_coding	-	-	9	13	19	2122	1214	1419	11	14	21	1471	1342	1388	707.89	15	1400	89.366	6.482	5.66757e-200	1.93326e-197	0.0132	0.0142
AT3G14185.1	ncRNA		other RNA	0	0	0	19	6	14	0	0	0	13	7	14	5.58	0	11	89.103	6.477	2.97541e-07	8.45784e-07	0.1801	0.2078
AT5G45380.1	protein_coding	DUR3, ATDUR3	DEGRADATION OF UREA 3	69	73	60	9274	6252	7388	88	78	66	6427	6913	7227	3466.58	77	6856	88.909	6.474	6.67755e-264	8.4899e-261	0.0136	0.013
AT1G65483.1	protein_coding	-	-	0	1	0	48	54	37	0	1	0	33	60	36	21.71	0	43	88.22	6.463	2.40591e-18	1.2772e-17	0.0796	0.0981
AT4G33040.1	protein_coding	-	-	66	64	65	8540	6150	6942	84	69	71	5918	6800	6791	3288.95	75	6503	87.233	6.447	1.03468e-266	1.37814e-263	0.0133	0.0129
AT2G32130.1	protein_coding	-	-	0	0	0	9	17	7	0	0	0	6	19	7	5.31	0	11	86.988	6.443	8.86574e-07	2.43097e-06	0.1955	0.2206
AT5G58840.2	protein_coding	-	-	1	1	3	207	167	195	1	1	3	143	185	191	87.42	2	173	86.492	6.434	1.48508e-52	2.18742e-51	0.0337	0.0299
AT4G18350.1	protein_coding	ATNCED2, NCED2	NINE-CIS-EPOXYCAROTENOID DIOXYGENASE 2, nine-cis-epoxycarotenoid dioxygenase 2	0	0	4	249	184	77	0	0	4	173	203	75	75.95	1	150	86.423	6.433	2.05886e-39	2.17725e-38	0.048	0.0331
AT1G08440.1	protein_coding	-	-	0	1	0	57	33	54	0	1	0	40	36	53	21.65	0	43	85.346	6.415	2.30984e-18	1.22713e-17	0.0791	0.0964
AT1G44542.1	protein_coding	CYCLASE3	CYCLASE3	0	0	0	7	12	13	0	0	0	5	13	13	5.14	0	10	84.962	6.409	9.25077e-07	2.53208e-06	0.1986	0.2232
AT3G04430.1	protein_coding	anac049, NAC049	NAC domain containing protein 49	0	0	0	13	14	7	0	0	0	9	15	7	5.22	0	10	84.88	6.407	7.02736e-07	1.94078e-06	0.1925	0.2187
AT5G53710.1	protein_coding	-	-	1	0	0	78	40	30	1	0	0	54	44	29	21.48	0	42	83.795	6.389	3.07761e-18	1.62606e-17	0.0778	0.0954
AT5G54060.1	protein_coding	UGT79B1, UF3GT	UDP-glucosyl transferase 79B1, UDP-glucose:flavonoid 3-o-glucosyltransferase	44	52	20	5873	3022	3455	56	56	22	4070	3342	3380	1820.89	45	3597	82.601	6.368	1.14071e-184	2.70396e-182	0.0183	0.0126
AT3G15740.1	protein_coding	-	-	0	0	0	5	8	18	0	0	0	3	9	18	4.99	0	10	82.119	6.36	1.98663e-06	5.30382e-06	0.2028	0.2257
AT5G05300.1	protein_coding	-	-	2	0	0	57	97	79	3	0	0	40	107	77	37.77	1	75	82.158	6.36	4.88736e-25	3.32452e-24	0.065	0.0632
AT1G55207.1	protein_coding	-	-	0	0	0	11	7	15	0	0	0	8	8	15	5.01	0	10	81.549	6.35	1.02979e-06	2.80962e-06	0.1959	0.2212
AT5G13080.1	protein_coding	WRKY75, ATWRKY75	WRKY DNA-binding protein 75, ARABIDOPSIS THALIANA WRKY DNA-BINDING PROTEIN 75	13	2	7	516	990	811	17	2	8	358	1095	793	378.67	9	749	80.155	6.325	2.08306e-56	3.40334e-55	0.0538	0.016
AT1G16950.1	protein_coding	-	-	0	0	0	11	9	12	0	0	0	8	10	12	4.89	0	10	79.889	6.32	1.13572e-06	3.0902e-06	0.1992	0.2237
AT1G02450.1	protein_coding	NIMIN1, NIMIN-1	NIM1-interacting 1	3	0	2	134	185	198	4	0	2	93	205	194	82.86	2	164	79.727	6.317	1.0208e-45	1.27753e-44	0.0393	0.0315
AT4G21930.1	protein_coding	-	-	2	3	2	319	206	221	3	3	2	221	228	216	112.17	3	222	79.716	6.317	1.58066e-63	3.03659e-62	0.0285	0.025
AT5G13320.2	protein_coding	AtGH3.12, GDG1, PBS3, WIN3, GH3.12	HOPW1-1-INTERACTING 3, GH3-LIKE DEFENSE GENE 1, GRETCHEN HAGEN 3.12, AVRPPHB SUSCEPTIBLE 3	18	8	24	1624	1755	1602	23	9	26	1125	1941	1567	781.83	19	1544	79.743	6.317	1.80274e-136	1.64249e-134	0.0218	0.0139
AT1G21245.1	protein_coding	-	-	1	0	0	34	45	49	1	0	0	24	50	48	20.42	0	41	79.343	6.31	7.34208e-17	3.64123e-16	0.0856	0.1037
AT1G22240.1	protein_coding	PUM8, APUM8	pumilio 8	3	0	0	101	103	123	4	0	0	70	114	120	51.34	1	101	78.526	6.295	2.98177e-31	2.4971e-30	0.0562	0.0473
AT5G06585.1	lncRNA			0	0	0	18	7	9	0	0	0	12	8	9	4.84	0	10	77.147	6.27	1.2956e-06	3.51088e-06	0.1948	0.2195
AT1G60470.1	protein_coding	AtGolS4, GolS4	galactinol synthase 4	14	5	6	982	631	861	18	5	7	681	698	842	375.05	10	740	76.437	6.256	4.87208e-131	3.86054e-129	0.0178	0.016
AT1G17615.1	protein_coding	-	-	0	0	0	12	9	10	0	0	0	8	10	10	4.68	0	9	76.191	6.252	1.68098e-06	4.51842e-06	0.2024	0.2265
AT3G60060.1	protein_coding	-	-	0	0	0	10	11	9	0	0	0	7	12	9	4.65	0	9	76.226	6.252	1.9553e-06	5.22316e-06	0.2044	0.2289
AT3G14030.1	protein_coding	-	-	0	0	0	15	9	8	0	0	0	10	10	8	4.7	0	9	75.735	6.243	1.65668e-06	4.4561e-06	0.2002	0.2242
AT3G58450.2	protein_coding	-	-	0	0	0	14	12	5	0	0	0	10	13	5	4.64	0	9	74.854	6.226	2.49358e-06	6.59243e-06	0.2024	0.2266
AT4G25010.1	protein_coding	SWEET14, AtSWEET14		5	7	7	733	465	628	6	8	8	508	514	614	276.34	7	545	74.477	6.219	1.48192e-122	1.00123e-120	0.0167	0.0171
AT5G42800.1	protein_coding	TT3, M318, DFR	dihydroflavonol 4-reductase	196	274	135	27113	13776	16069	250	294	148	18790	15233	15720	8405.66	231	16581	73.942	6.208	1.99904e-161	3.08924e-159	0.0232	0.0156
AT4G22105.1	protein_coding	SCRL26	SCR-like 26	0	0	0	9	9	11	0	0	0	6	10	11	4.49	0	9	73.79	6.205	2.7564e-06	7.25846e-06	0.209	0.2317
AT5G58820.1	protein_coding	-	-	0	0	0	9	9	11	0	0	0	6	10	11	4.49	0	9	73.79	6.205	2.75265e-06	7.24927e-06	0.2089	0.2317
AT5G54165.1	protein_coding	-	-	3	1	2	217	181	186	4	1	2	150	200	182	89.93	2	177	73.595	6.202	5.58889e-52	8.12088e-51	0.0338	0.0293
AT2G28400.1	protein_coding	-	-	12	10	8	919	850	1000	15	11	9	637	940	978	431.63	12	852	73.437	6.198	3.51827e-152	4.24179e-150	0.0149	0.0156
AT1G33030.2	protein_coding	-	-	11	15	4	929	841	929	14	16	4	644	930	909	419.51	11	828	72.141	6.173	4.51194e-140	4.38206e-138	0.0167	0.0157
AT4G37370.1	protein_coding	CYP81D8	"cytochrome P450, family 81, subfamily D, polypeptide 8"	33	39	27	2707	2916	3251	42	42	30	1876	3224	3180	1399.02	38	2760	71.895	6.168	1.59678e-184	3.75324e-182	0.0166	0.0128
AT5G26690.1	protein_coding	-	-	3	2	0	134	169	163	4	2	0	93	187	159	74.19	2	146	71.867	6.167	2.39975e-42	2.74645e-41	0.0411	0.0344
AT5G25550.1	protein_coding	-	-	0	0	0	4	12	10	0	0	0	3	13	10	4.3	0	9	71.504	6.16	6.60149e-06	1.686e-05	0.2168	0.2399
AT5G54610.1	protein_coding	BDA1, ANK	ankyrin, bian da 2 (becoming big in Chinese)	1	6	8	397	409	489	1	6	9	275	452	478	203.7	5	402	71.299	6.156	6.52926e-94	2.42215e-92	0.021	0.0188
AT2G43730.1	protein_coding	-	-	0	0	0	2	14	9	0	0	0	1	15	9	4.28	0	8	71.108	6.152	1.13934e-05	2.84564e-05	0.2218	0.2428
AT4G37990.1	protein_coding	ELI3-2, ATCAD8, ELI3, CAD-B2	elicitor-activated gene 3-2, CINNAMYL-ALCOHOL DEHYDROGENASE B2, ARABIDOPSIS THALIANA CINNAMYL-ALCOHOL DEHYDROGENASE 8, ELICITOR-ACTIVATED GENE 3	15	9	1	740	812	652	19	10	1	513	898	638	346.4	10	683	70.724	6.144	3.9486e-88	1.29328e-86	0.0295	0.0163
AT1G73810.1	protein_coding	-	-	11	4	9	719	652	759	14	4	10	498	721	742	331.65	9	654	70.175	6.133	3.63448e-121	2.3808e-119	0.0183	0.0165
AT3G13130.1	protein_coding	-	-	1	2	1	112	116	137	1	2	1	78	128	134	57.4	1	113	69.823	6.126	4.9109e-37	4.87621e-36	0.0434	0.0428
AT1G69490.1	protein_coding	NAP, ATNAP, ANAC029	NAC-like, activated by AP3/PI, NAC-LIKE, ACTIVATED BY AP3/PI, Arabidopsis NAC domain containing protein 29	10	18	9	985	1108	1046	13	19	10	683	1225	1023	495.5	14	977	69.718	6.123	1.01795e-172	1.9773e-170	0.013	0.0152
AT1G17744.1	protein_coding	-	-	2	0	1	98	74	116	3	0	1	68	82	113	44.48	1	88	69.154	6.112	6.85483e-30	5.49704e-29	0.0529	0.0533
AT5G39100.1	protein_coding	GLP6	germin-like protein 6	0	0	1	31	42	34	0	0	1	21	46	33	17.05	0	33	68.158	6.091	1.14533e-14	5.10614e-14	0.0955	0.118
AT2G04070.1	protein_coding	-	-	5	8	9	578	615	628	6	9	10	401	680	614	286.62	8	565	67.387	6.074	4.15551e-123	2.84887e-121	0.0163	0.017
AT5G24860.2	protein_coding	ATFPF1, FPF1	ARABIDOPSIS FLOWERING PROMOTING FACTOR 1, FLOWERING PROMOTING FACTOR 1	0	2	0	51	58	74	0	2	0	35	64	72	29	1	57	67.094	6.068	2.2741e-21	1.36062e-20	0.0708	0.0782
AT1G63340.1	protein_coding	-	-	0	3	0	122	73	86	0	3	0	85	81	84	42.1	1	83	66.923	6.064	4.59931e-28	3.46945e-27	0.0583	0.0553
AT3G44290.2	protein_coding	ANAC60, ANAC060, NTL5, NAC060	NAC domain containing protein 60	0	0	1	43	34	33	0	0	1	30	38	32	16.8	0	33	66.66	6.059	8.23515e-15	3.69498e-14	0.0941	0.1168
AT5G66780.2	protein_coding	-	-	0	0	0	14	9	5	0	0	0	10	10	5	4.09	0	8	65.725	6.038	7.15783e-06	1.82081e-05	0.2136	0.2352
AT2G06485.1	lncRNA			0	0	0	18	4	8	0	0	0	12	4	8	4.12	0	8	64.803	6.018	7.74896e-06	1.96577e-05	0.2085	0.2301
AT4G28485.2	protein_coding	DMP7, AtDMP7	DUF679 domain membrane protein 7, Arabidopsis thaliana DUF679 domain membrane protein 7	0	0	0	10	9	7	0	0	0	7	10	7	3.95	0	8	64.624	6.014	8.31555e-06	2.10283e-05	0.2185	0.2408
AT4G18422.1	protein_coding	-	-	10	2	5	578	349	502	13	2	5	401	386	491	216.32	7	426	64.525	6.012	4.6691e-87	1.47237e-85	0.0242	0.0184
AT3G24900.2	protein_coding	AtRLP39, RLP39	receptor like protein 39	0	0	2	103	39	58	0	0	2	71	43	57	28.9	1	57	64.505	6.011	1.6098e-21	9.70218e-21	0.0691	0.075
AT4G26590.1	protein_coding	OPT5, ATOPT5	ARABIDOPSIS THALIANA OLIGOPEPTIDE TRANSPORTER 5, oligopeptide transporter 5	2	0	0	111	43	47	3	0	0	77	48	46	28.83	1	57	64.372	6.008	1.45022e-21	8.75357e-21	0.068	0.075
AT5G63350.1	protein_coding	-	-	3	2	1	269	103	173	4	2	1	186	114	169	79.44	2	156	64.19	6.004	1.22767e-46	1.57087e-45	0.0357	0.0317
AT4G18870.1	protein_coding	-	-	0	0	0	12	6	9	0	0	0	8	7	9	3.96	0	8	64.11	6.002	8.20163e-06	2.07477e-05	0.2178	0.2381
AT5G66890.1	protein_coding	-	-	0	0	0	8	8	9	0	0	0	6	9	9	3.87	0	8	63.599	5.991	1.04333e-05	2.61706e-05	0.2237	0.2437
AT4G32940.1	protein_coding	GAMMAVPE, GAMMA-VPE	gamma vacuolar processing enzyme	1674	2048	1992	200207	126128	138389	2133	2201	2177	138747	139466	135379	70017.3	2170	137864	63.52	5.989	1.26735e-157	1.74625e-155	0.0234	0.0266
AT1G02440.2	protein_coding	ATARFD1A, ARFD1A	ADP-ribosylation factor D1A	0	0	0	1	12	9	0	0	0	1	13	9	3.79	0	8	63.236	5.983	3.3378e-05	7.98168e-05	0.2365	0.2528
AT1G55775.1	protein_coding	-	-	1	0	2	77	81	96	1	0	2	53	90	94	40.05	1	79	63.243	5.983	2.34977e-27	1.72916e-26	0.0562	0.0591
AT1G06567.1	lncRNA			0	0	0	15	4	9	0	0	0	10	4	9	3.94	0	8	62.651	5.969	1.03583e-05	2.59919e-05	0.2147	0.2355
AT3G16150.1	protein_coding	ASPGB1	asparaginase B1	16	33	37	2325	1779	2480	20	35	40	1611	1967	2426	1016.79	32	2001	62.196	5.959	4.62072e-216	2.05153e-213	0.0122	0.0133
AT5G06510.2	protein_coding	NF-YA10	"nuclear factor Y, subunit A10"	30	33	30	3024	1961	2399	38	35	33	2096	2168	2347	1119.56	35	2204	62.027	5.955	4.02677e-226	2.25266e-223	0.0119	0.0131
AT5G45870.1	protein_coding	RCAR6, PYL12	PYR1-like 12, regulatory components of ABA receptor 6	0	0	0	18	3	8	0	0	0	12	3	8	3.94	0	8	61.525	5.943	1.36482e-05	3.38434e-05	0.2141	0.233
AT1G21520.1	protein_coding	-	-	53	68	61	3525	4370	6279	68	73	67	2443	4832	6142	2270.79	69	4472	61.206	5.936	8.02794e-151	9.39538e-149	0.0213	0.0125
AT2G23800.1	protein_coding	GGPS5, GGPS2	geranylgeranyl pyrophosphate synthase 2, GERANYLGERANYL PYROPHOSPHATE SYNTHASE 5	0	0	0	11	12	2	0	0	0	8	13	2	3.81	0	8	61.051	5.932	2.42822e-05	5.88406e-05	0.2245	0.2439
AT2G45840.1	protein_coding	-	-	0	0	0	15	6	6	0	0	0	10	7	6	3.82	0	8	60.856	5.927	1.21524e-05	3.02657e-05	0.2168	0.2384
AT3G60120.1	protein_coding	BGLU27	beta glucosidase 27	0	3	0	86	109	35	0	3	0	60	121	34	36.26	1	72	60.369	5.916	5.0661e-24	3.33892e-23	0.062	0.0646
AT1G07900.1	protein_coding	LBD1	LOB domain-containing protein 1	7	5	3	457	339	371	9	5	3	317	375	363	178.68	6	352	60.172	5.911	2.10753e-82	5.98474e-81	0.0232	0.0197
AT5G48400.1	protein_coding	ATGLR1.2, GLR1.2	GLUTAMATE RECEPTOR 1.2	2	9	2	371	283	329	3	10	2	257	313	322	151.05	5	297	60.17	5.911	1.36316e-69	2.9835e-68	0.0278	0.0212
AT1G30220.1	protein_coding	ATINT2, INT2	ARABIDOPSIS THALIANA INOSITOL TRANSPORTER 2, inositol transporter 2	4	2	10	487	322	413	5	2	11	338	356	404	185.96	6	366	59.976	5.906	5.26645e-83	1.52968e-81	0.0235	0.0194
AT2G25297.2	protein_coding	-	-	2	2	1	89	142	146	3	2	1	62	157	143	61.22	2	121	59.52	5.895	1.2766e-36	1.25378e-35	0.043	0.0409
AT5G08005.1	protein_coding	-	-	0	0	0	3	6	13	0	0	0	2	7	13	3.57	0	7	59.05	5.884	3.71613e-05	8.84327e-05	0.239	0.2533
AT3G04690.1	protein_coding	ANX1	ANXUR1	0	0	0	8	12	3	0	0	0	6	13	3	3.62	0	7	58.809	5.878	3.30118e-05	7.89681e-05	0.2353	0.2502
AT1G68620.1	protein_coding	-	-	10	12	17	886	940	976	13	13	19	614	1039	955	442.07	15	869	58.563	5.872	1.27775e-157	1.75195e-155	0.0135	0.0156
AT1G08630.1	protein_coding	THA1	threonine aldolase 1	26	34	33	2957	1850	2163	33	37	36	2049	2046	2116	1052.76	35	2070	58.455	5.869	2.14512e-224	1.11113e-221	0.0116	0.0133
AT2G35730.2	protein_coding	-	-	2	0	1	55	110	71	3	0	1	38	122	69	38.81	1	76	58.121	5.861	4.45673e-24	2.94355e-23	0.0639	0.062
AT2G27389.1	protein_coding	-	-	0	0	0	9	4	11	0	0	0	6	4	11	3.57	0	7	57.966	5.857	2.409e-05	5.83849e-05	0.2302	0.2472
AT3G28620.1	protein_coding	-	-	1	0	1	68	37	66	1	0	1	47	41	65	25.83	1	51	57.809	5.853	5.4164e-20	3.06189e-19	0.0701	0.084
AT3G55090.1	protein_coding	AtABCG16, ABCG16	ATP-binding cassette G16	2	1	1	143	93	86	3	1	1	99	103	84	48.46	2	95	57.758	5.852	3.31368e-32	2.86071e-31	0.0474	0.0489
AT1G28480.1	protein_coding	GRXC9, roxy19, GRX480		1	0	0	24	29	40	1	0	0	17	32	39	14.85	0	29	57.043	5.834	1.12909e-12	4.53043e-12	0.1073	0.1295
AT1G79900.1	protein_coding	BAC2, ATMBAC2	ARABIDOPSIS MITOCHONDRIAL BASIC AMINO ACID CARRIER 2	2	5	5	326	230	317	3	5	5	226	254	310	133.96	4	263	56.921	5.831	3.177e-69	6.90474e-68	0.0253	0.0226
AT5G24655.1	protein_coding	LSU4	RESPONSE TO LOW SULFUR 4	6	5	7	448	392	449	8	5	8	310	433	439	200.64	7	394	56.742	5.826	4.0387e-91	1.41918e-89	0.0206	0.0189
AT2G01580.1	protein_coding	-	-	1	1	3	125	101	142	1	1	3	87	112	139	57.14	2	113	56.58	5.822	5.01569e-36	4.8511e-35	0.0434	0.0427
AT5G64190.1	protein_coding	-	-	1	0	4	151	140	90	1	0	4	105	155	88	58.86	2	116	56.334	5.816	4.82359e-33	4.2764e-32	0.0515	0.0416
AT1G29860.1	protein_coding	ATWRKY71, EXB1, WRKY71	WRKY DNA-binding protein 71, EXCESSIVE BRANCHES1, WRKY DNA-BINDING PROTEIN 71	1	1	5	186	157	161	1	1	5	129	174	157	77.97	2	153	56.077	5.809	2.83438e-43	3.31123e-42	0.0396	0.0327
AT3G27250.1	protein_coding	-	-	1	0	0	56	18	27	1	0	0	39	20	26	14.4	0	28	55.979	5.807	6.63519e-13	2.69679e-12	0.1005	0.1253
AT4G25000.1	protein_coding	ATAMY1, AMY1	alpha-amylase-like	2	7	9	444	352	450	3	8	10	308	389	440	192.84	7	379	55.726	5.8	2.81077e-88	9.2277e-87	0.0212	0.0191
AT1G48590.1	protein_coding	CAR5	C2-domain ABA-related 5	0	0	0	8	9	5	0	0	0	6	10	5	3.4	0	7	55.652	5.798	3.38127e-05	8.08147e-05	0.2386	0.2538
AT5G00845.1	lncRNA			0	0	0	11	3	10	0	0	0	8	3	10	3.45	0	7	55.445	5.793	3.30726e-05	7.91066e-05	0.2311	0.2475
AT1G22290.2	protein_coding	-	-	0	0	0	8	2	13	0	0	0	6	2	13	3.41	0	7	54.766	5.775	5.52748e-05	0.000129272	0.237	0.2506
AT1G21240.1	protein_coding	WAK3	wall associated kinase 3	19	18	15	1202	1247	1095	24	19	16	833	1379	1071	557.17	20	1094	54.546	5.769	7.00427e-161	1.06476e-158	0.0142	0.0149
AT4G28420.2	protein_coding	-	-	0	0	0	11	6	6	0	0	0	8	7	6	3.35	0	7	54.312	5.763	2.8451e-05	6.84208e-05	0.2245	0.2508
AT1G21970.1	protein_coding	EMB 212, NF-YB9, AtLEC1, EMB212, LEC1	LEAFY COTYLEDON 1, NUCLEAR FACTOR Y, SUBUNIT B9, EMBRYO DEFECTIVE 212	0	0	0	8	5	9	0	0	0	6	6	9	3.31	0	7	54.222	5.761	3.69422e-05	8.79263e-05	0.2387	0.2539
AT5G40382.2	protein_coding	-	-	2	2	0	131	85	83	3	2	0	91	94	81	45.11	2	89	54.138	5.759	7.00058e-30	5.61231e-29	0.0509	0.0521
AT4G26950.2	protein_coding	-	-	27	23	27	1997	1502	1760	34	25	30	1384	1661	1722	809.19	30	1589	53.869	5.751	2.19185e-187	5.47395e-185	0.0132	0.0139
AT1G52890.1	protein_coding	NAC019, ANAC019	NAC domain containing protein 19	21	38	13	1568	1430	1747	27	41	14	1087	1581	1709	743.11	27	1459	53.801	5.75	1.85156e-129	1.4228e-127	0.0207	0.0141
AT3G09950.1	protein_coding	-	-	1	0	2	72	47	100	1	0	2	50	52	98	33.86	1	67	53.773	5.749	1.39638e-23	9.05172e-23	0.0612	0.0677
AT3G28580.1	protein_coding	-	-	5	5	2	340	240	254	6	5	2	236	265	248	127.24	4	250	53.386	5.738	2.7182e-64	5.32057e-63	0.0274	0.0232
AT2G25440.1	protein_coding	RLP20, AtRLP20	receptor like protein 20	1	0	0	40	25	26	1	0	0	28	28	25	13.68	0	27	53.314	5.736	2.18064e-12	8.61874e-12	0.107	0.1328
AT4G08570.1	protein_coding	-	-	9	6	5	670	347	402	11	6	5	464	384	393	210.78	7	414	53.27	5.735	1.43317e-93	5.27464e-92	0.0201	0.0185
AT2G05855.1	lncRNA			0	0	0	7	6	8	0	0	0	5	7	8	3.22	0	7	53	5.728	4.4727e-05	0.000105486	0.2435	0.2574
AT4G06935.1	lncRNA			0	0	0	7	6	8	0	0	0	5	7	8	3.22	0	7	53	5.728	4.46505e-05	0.000105323	0.2433	0.2574
AT5G55410.2	protein_coding	-	-	1	0	3	121	77	91	1	0	3	84	85	89	43.76	1	86	52.908	5.725	1.21758e-28	9.35627e-28	0.0538	0.0536
AT1G05340.1	protein_coding	-	-	29	9	15	1197	1039	1258	37	10	16	830	1149	1231	545.35	21	1070	52.793	5.722	7.57136e-79	1.96091e-77	0.0353	0.0149
AT4G04990.1	protein_coding	-	-	0	9	1	227	192	209	0	10	1	157	212	204	97.47	4	191	52.652	5.718	4.3286e-43	5.03222e-42	0.0456	0.0276
AT2G01920.1	protein_coding	-	-	0	0	0	6	8	6	0	0	0	4	9	6	3.15	0	6	51.978	5.7	5.75882e-05	0.000134446	0.2477	0.2609
AT2G25770.2	protein_coding	-	-	0	0	1	32	24	28	0	0	1	22	27	27	12.87	0	25	51.411	5.684	7.68701e-12	2.94943e-11	0.1112	0.1391
AT4G04490.1	protein_coding	CRK36	cysteine-rich RLK (RECEPTOR-like protein kinase) 36	14	9	13	723	725	860	18	10	14	501	802	841	364.29	14	715	51.208	5.678	7.01809e-124	4.87104e-122	0.0168	0.0161
AT1G66600.1	protein_coding	WRKY63, ABO3, ATWRKY63	ABA overly sensitive mutant 3, WRKY DNA-binding protein 63	2	2	1	67	145	107	3	2	1	46	160	105	52.87	2	104	50.969	5.672	4.4285e-31	3.68221e-30	0.0482	0.047
AT4G35170.1	protein_coding	CC4	companion of cellulose synthase 4	1	0	0	30	30	24	1	0	0	21	33	23	13.12	0	26	50.784	5.666	1.01993e-11	3.8899e-11	0.113	0.1388
AT5G50360.1	protein_coding	-	-	2	0	0	77	33	45	3	0	0	53	36	44	22.74	1	44	50.643	5.662	1.47074e-17	7.54829e-17	0.0792	0.0915
AT2G02300.1	protein_coding	PP2-B5, AtPP2-B5	phloem protein 2-B5	0	0	0	8	3	10	0	0	0	6	3	10	3.11	0	6	50.378	5.655	7.37291e-05	0.000170662	0.2458	0.2576
AT4G37420.1	protein_coding	-	-	0	0	0	7	6	7	0	0	0	5	7	7	3.06	0	6	50.319	5.653	6.34909e-05	0.000147746	0.2482	0.2611
AT3G04475.1	lncRNA			0	0	0	2	8	8	0	0	0	1	9	8	3.01	0	6	50.28	5.652	0.00011354	0.000257505	0.2569	0.2682
AT1G76960.1	protein_coding	-	-	66	71	85	5272	4133	4506	84	76	93	3654	4570	4408	2147.49	84	4211	49.789	5.638	1.4636e-229	8.89966e-227	0.0125	0.0125
AT2G18050.1	protein_coding	HIS1-3	histone H1-3	28	17	37	1930	1648	1544	36	18	40	1338	1822	1510	794.1	31	1557	49.631	5.633	1.81675e-134	1.53524e-132	0.0196	0.0139
AT5G40310.2	protein_coding	-	-	0	0	1	45	24	19	0	0	1	31	27	19	12.9	0	26	49.613	5.633	1.1461e-11	4.35447e-11	0.1106	0.1362
AT1G24600.1	protein_coding	-	-	2	2	0	91	73	103	3	2	0	63	81	101	41.54	2	82	49.242	5.622	6.98554e-27	5.05544e-26	0.0558	0.0568
AT2G40170.1	protein_coding	GEA6, EM6, ATEM6	LATE EMBRYOGENESIS ABUNDANT 6, EARLY METHIONINE-LABELLED 6, ARABIDOPSIS EARLY METHIONINE-LABELLED 6	0	0	1	40	24	21	0	0	1	28	27	21	12.65	0	25	49.259	5.622	1.42689e-11	5.38906e-11	0.112	0.1388
AT3G22231.1	protein_coding	PCC1	PATHOGEN AND CIRCADIAN CONTROLLED 1	102	94	94	6009	5588	6400	130	101	103	4164	6179	6261	2822.97	111	5535	49.213	5.621	2.8464e-159	4.16842e-157	0.0193	0.0127
AT3G13229.1	protein_coding	-	-	0	0	1	21	19	36	0	0	1	15	21	35	11.98	0	24	49.043	5.616	6.37387e-11	2.3211e-10	0.1182	0.1471
AT3G46160.1	protein_coding	-	-	0	0	0	6	7	6	0	0	0	4	8	6	2.96	0	6	48.952	5.613	8.31167e-05	0.000191536	0.2527	0.2648
AT5G39010.1	protein_coding	-	-	0	0	0	5	4	10	0	0	0	3	4	10	2.95	0	6	48.735	5.607	1.94361e-05	4.75258e-05	0.11	0.2647
AT4G21440.1	protein_coding	ATM4, ATMYB102, MYB102	MYB-like 102, A. THALIANA MYB 4	0	6	0	194	90	107	0	6	0	134	100	105	57.51	2	113	48.565	5.602	2.01061e-28	1.53031e-27	0.065	0.0416
AT5G24640.1	protein_coding	-	-	2	6	0	89	174	201	3	6	0	62	192	197	76.62	3	150	48.517	5.6	2.72222e-37	2.72329e-36	0.045	0.0338
AT4G38030.1	protein_coding	-	-	0	0	0	4	8	6	0	0	0	3	9	6	2.91	0	6	48.455	5.599	0.000110214	0.000250451	0.2577	0.2685
AT5G28470.2	protein_coding	-	-	0	0	0	7	9	3	0	0	0	5	10	3	2.96	0	6	48.215	5.591	0.000112686	0.000255652	0.2538	0.2648
AT1G78760.1	protein_coding	-	-	0	0	0	7	2	11	0	0	0	5	2	11	2.97	0	6	47.89	5.582	0.000129498	0.000291995	0.2518	0.2612
AT3G23240.1	protein_coding	ERF1B, AtERF#092, ERF1	ethylene response factor 1	4	2	0	76	152	145	5	2	0	53	168	142	61.64	2	121	47.902	5.582	4.09494e-30	3.31039e-29	0.0558	0.0408
AT5G28380.2	protein_coding	-	-	0	0	0	10	6	4	0	0	0	7	7	4	2.91	0	6	47.112	5.558	9.55421e-05	0.000218745	0.2496	0.2615
AT3G03910.1	protein_coding	GDH3	glutamate dehydrogenase 3	4	18	21	1060	670	807	5	19	23	735	741	789	385.38	16	755	47.072	5.557	1.4477e-120	9.33035e-119	0.0178	0.016
AT1G28590.1	protein_coding	-	-	1	3	0	85	76	86	1	3	0	59	84	84	38.6	1	76	47.054	5.556	4.86939e-25	3.31391e-24	0.0602	0.0607
AT5G63750.1	protein_coding	ARI13, ATARI13	ARIADNE 13, ARABIDOPSIS ARIADNE 13	2	0	2	96	70	89	3	0	2	67	77	87	39.29	2	77	46.966	5.554	5.51434e-26	3.87834e-25	0.0567	0.0594
AT1G57730.1	protein_coding	-	-	0	0	0	11	2	8	0	0	0	8	2	8	2.94	0	6	46.854	5.55	0.0001148	0.000260175	0.2468	0.258
AT3G09835.1	lncRNA			0	0	0	9	3	8	0	0	0	6	3	8	2.9	0	6	46.842	5.55	0.000105508	0.000240342	0.2495	0.2614
AT3G18250.1	protein_coding	-	-	4	3	7	248	309	259	5	3	8	172	342	253	130.48	5	256	46.812	5.549	1.24127e-60	2.24141e-59	0.0287	0.023
AT1G51000.1	protein_coding	-	-	0	0	0	3	6	8	0	0	0	2	7	8	2.76	0	6	45.97	5.523	0.000166302	0.000370737	0.2647	0.2726
AT2G14620.2	protein_coding	XTH10	xyloglucan endotransglucosylase/hydrolase 10	12	17	28	799	1430	953	15	18	31	554	1581	932	521.9	21	1022	45.871	5.519	3.68711e-118	2.24201e-116	0.0194	0.0151
AT5G16740.1	protein_coding	-	-	2	0	0	41	37	56	3	0	0	28	41	55	21.11	1	41	45.652	5.513	2.24731e-15	1.0349e-14	0.0927	0.1002
AT3G15518.1	protein_coding	-	-	1	2	9	168	213	261	1	2	10	116	236	255	103.42	4	202	45.64	5.512	7.39809e-49	1.00258e-47	0.0354	0.0267
AT1G66380.2	protein_coding	AtMYB114, MYB114	myb domain protein 114	1	1	0	50	35	49	1	1	0	35	39	48	20.61	1	41	45.609	5.511	2.68347e-16	1.29524e-15	0.0815	0.1008
AT4G27845.1	protein_coding	-	-	0	0	0	6	5	7	0	0	0	4	6	7	2.76	0	6	45.499	5.508	0.000129085	0.00029111	0.2577	0.2688
AT1G04047.1	lncRNA			1	0	0	27	28	20	1	0	0	19	31	20	11.75	0	23	45.333	5.502	1.43991e-10	5.13065e-10	0.1232	0.1485
AT5G09205.1	lncRNA			0	0	0	4	6	7	0	0	0	3	7	7	2.71	0	6	45.101	5.495	0.000163489	0.000364874	0.2647	0.2727
AT1G51330.1	protein_coding	-	-	0	0	0	2	10	4	0	0	0	1	11	4	2.73	0	5	45.035	5.493	0.000285882	0.000621515	0.2743	0.2766
AT1G60190.1	protein_coding	AtPUB19, PUB19	plant U-box 19	10	3	5	539	254	293	13	3	5	374	281	287	160.41	7	314	44.983	5.491	2.95468e-72	6.7742e-71	0.0246	0.0206
AT3G22235.1	protein_coding	-	-	161	180	136	8443	8456	9960	205	193	149	5851	9350	9743	4248.67	182	8315	44.818	5.486	4.96491e-129	3.79436e-127	0.0239	0.0134
AT1G10070.3	protein_coding	BCAT-2, ATBCAT-2, BCAT2	branched-chain amino acid transferase 2, branched-chain amino acid transaminase 2	47	38	72	3627	2579	2579	60	41	79	2514	2852	2523	1344.61	60	2630	44.4	5.473	7.50221e-156	9.85185e-154	0.0175	0.0128
AT3G29590.1	protein_coding	AT5MAT		38	32	36	2958	1697	1547	48	34	39	2050	1876	1513	926.99	40	1813	44.418	5.473	1.57419e-193	4.35958e-191	0.0124	0.0135
AT4G36000.1	protein_coding	-	-	1	1	5	155	113	132	1	1	5	107	125	129	61.55	2	120	44.286	5.469	2.4315e-35	2.30391e-34	0.0447	0.0398
AT5G08875.1	ncRNA			0	0	0	5	6	6	0	0	0	3	7	6	2.66	0	5	44.17	5.465	0.000170726	0.000380054	0.2662	0.2728
AT1G03495.1	protein_coding	-	-	6	14	6	933	305	394	8	15	7	647	337	385	233.09	10	456	44.052	5.461	4.31126e-80	1.15067e-78	0.0248	0.0179
AT2G30730.2	protein_coding	-	-	0	0	0	7	4	7	0	0	0	5	4	7	2.69	0	5	44.059	5.461	0.000153053	0.000342402	0.2587	0.269
AT2G45410.1	protein_coding	LBD19	LOB domain-containing protein 19	0	0	0	8	7	3	0	0	0	6	8	3	2.7	0	6	43.976	5.459	0.00017202	0.000382783	0.2591	0.269
AT1G04330.1	protein_coding	-	-	3	5	9	344	241	354	4	5	10	238	266	346	145.04	6	283	43.917	5.457	4.83558e-70	1.07006e-68	0.0241	0.0217
AT1G02470.1	protein_coding	-	-	24	29	25	1344	1313	1586	31	31	27	931	1452	1552	670.64	30	1312	43.736	5.451	1.17568e-164	1.91192e-162	0.0137	0.0143
AT5G18130.2	protein_coding	-	-	196	224	243	14412	11358	10849	250	241	266	9988	12559	10613	5652.67	252	11053	43.681	5.449	2.978e-210	1.12564e-207	0.0144	0.0141
AT5G43200.1	protein_coding	-	-	0	0	0	3	7	6	0	0	0	2	8	6	2.61	0	5	43.647	5.448	0.000232899	0.000511577	0.2732	0.2768
AT1G19510.1	protein_coding	RL5, ATRL5, RSM4	RAD-like 5, RADIALIS-LIKE SANT/MYB 4	0	3	1	66	58	102	0	3	1	46	64	100	35.66	1	70	43.548	5.445	5.84001e-23	3.71168e-22	0.0634	0.0652
AT4G37290.1	protein_coding	-	-	3	0	0	51	66	63	4	0	0	35	73	62	28.96	1	57	43.175	5.432	1.09113e-17	5.63201e-17	0.0885	0.0788
AT1G28230.1	protein_coding	PUP1, ATPUP1	purine permease 1	64	70	81	4735	3337	3669	82	75	89	3281	3690	3589	1800.97	82	3520	43.038	5.428	3.59416e-220	1.67554e-217	0.0121	0.0126
AT4G33905.1	protein_coding	-	-	13	15	7	992	474	538	17	16	8	687	524	526	296.37	14	579	42.894	5.423	1.43132e-113	7.86554e-112	0.0166	0.0168
AT3G03480.1	protein_coding	CHAT	acetyl CoA:(Z)-3-hexen-1-ol acetyltransferase	2	0	3	151	61	89	3	0	3	105	67	87	44.16	2	86	42.763	5.418	3.84716e-28	2.90835e-27	0.0514	0.0524
AT1G03940.1	protein_coding	-	-	32	46	27	3250	1247	1632	41	49	30	2252	1379	1597	891.23	40	1743	42.722	5.417	4.01482e-152	4.81968e-150	0.0163	0.0136
AT1G06877.1	snRNA			0	0	0	4	7	5	0	0	0	3	8	5	2.57	0	5	42.696	5.416	0.00023933	0.000525042	0.2725	0.277
AT1G23201.2	protein_coding	-	-	0	0	0	4	7	5	0	0	0	3	8	5	2.57	0	5	42.696	5.416	0.000239661	0.000525688	0.2727	0.277
AT1G67360.2	protein_coding	LDAP1, SRP1	LD-associated protein 1, small rubber particle protein	233	333	285	18342	12867	14532	297	358	311	12711	14228	14216	7020.2	322	13718	42.639	5.414	1.60225e-222	7.72697e-220	0.0136	0.0149
AT1G27610.2	protein_coding	-	-	0	0	0	8	3	7	0	0	0	6	3	7	2.62	0	5	42.536	5.411	0.000192125	0.000425726	0.2591	0.2692
AT3G08935.1	lncRNA			0	0	0	7	9	1	0	0	0	5	10	1	2.63	0	5	42.24	5.401	0.000351535	0.000756135	0.2691	0.273
AT3G44830.1	protein_coding	-	-	0	2	0	29	45	35	0	2	0	20	50	34	17.71	1	35	42.074	5.395	6.75566e-14	2.88934e-13	0.0956	0.1155
AT5G22990.1	protein_coding	-	-	0	0	0	4	5	7	0	0	0	3	6	7	2.52	0	5	42.01	5.393	0.000250264	0.000547827	0.2725	0.277
AT5G44920.2	protein_coding	AtTIK, TIK	TIR-KASH protein	9	24	14	825	687	914	11	26	15	572	760	894	379.68	17	742	41.973	5.391	1.54369e-126	1.13033e-124	0.0157	0.016
AT3G21420.1	protein_coding	LBO1	LATERAL BRANCHING OXIDOREDUCTASE 1	73	92	101	5307	3793	4938	93	99	110	3678	4194	4831	2167.47	101	4234	41.906	5.389	3.01759e-235	2.11012e-232	0.0114	0.0125
AT2G04495.1	protein_coding	-	-	5	1	1	107	144	133	6	1	1	74	159	130	62	3	121	41.869	5.388	6.10679e-30	4.90419e-29	0.0566	0.0403
AT4G15610.2	protein_coding	CASPL1D1	CASP-like protein 1D1	93	123	92	5618	4718	5844	119	132	101	3893	5217	5717	2529.74	117	4942	41.887	5.388	9.84217e-185	2.35295e-182	0.0153	0.0126
AT2G43000.2	protein_coding	ANAC042, JUB1, NAC042	JUNGBRUNNEN 1, NAC domain containing protein 42	11	2	5	292	386	293	14	2	5	202	427	287	156.24	7	305	41.839	5.387	2.87699e-44	3.46863e-43	0.0485	0.021
AT3G22560.1	protein_coding	-	-	4	2	0	120	83	136	5	2	0	83	92	133	52.54	2	103	41.788	5.385	1.00221e-28	7.72256e-28	0.0557	0.0459
AT3G12410.1	protein_coding	-	-	0	2	3	122	78	81	0	2	3	85	86	79	42.58	2	83	41.711	5.382	3.543e-27	2.58885e-26	0.0537	0.0549
AT1G43810.1	protein_coding	-	-	0	0	0	5	7	4	0	0	0	3	8	4	2.52	0	5	41.669	5.381	0.000263665	0.000575451	0.2733	0.2771
AT1G80160.3	protein_coding	GLYI7	glyoxylase I 7	6	16	9	635	434	560	8	17	10	440	480	548	250.41	12	489	41.645	5.38	1.79741e-96	7.01191e-95	0.0194	0.0176
AT4G37950.1	protein_coding	-	-	0	0	0	12	0	8	0	0	0	8	0	8	2.69	0	5	41.639	5.38	0.000347811	0.000748528	0.2482	0.2619
AT1G70640.1	protein_coding	-	-	8	2	0	273	111	170	10	2	0	189	123	166	81.76	4	159	41.492	5.375	3.25498e-37	3.25044e-36	0.0479	0.031
AT1G01560.1	protein_coding	MPK11, ATMPK11	MAP kinase 11	2	7	20	407	509	456	3	8	22	282	563	446	220.48	11	430	41.25	5.366	2.74131e-64	5.36205e-63	0.0329	0.0183
AT1G58225.1	protein_coding	-	-	1	5	0	80	115	99	1	5	0	55	127	97	47.68	2	93	41.102	5.361	1.36345e-27	1.01186e-26	0.055	0.051
AT1G52855.1	protein_coding	-	-	7	7	6	405	318	325	9	8	7	281	352	318	162.21	8	317	41.007	5.358	3.62378e-75	8.79105e-74	0.0225	0.0205
AT2G03580.1	protein_coding	-	-	0	0	0	3	6	6	0	0	0	2	7	6	2.43	0	5	40.623	5.344	0.000344182	0.000741346	0.2817	0.2814
AT4G14090.1	protein_coding	-	-	104	83	64	6212	3359	3638	133	89	70	4305	3714	3559	1978.3	97	3859	40.536	5.341	1.39184e-197	4.47483e-195	0.0137	0.0125
AT3G48580.1	protein_coding	XTH11	xyloglucan endotransglucosylase/hydrolase 11	1	5	3	138	173	133	1	5	3	96	191	130	71.16	3	139	40.469	5.339	5.92586e-40	6.37754e-39	0.0374	0.0356
AT1G51020.1	protein_coding	-	-	0	0	0	2	4	9	0	0	0	1	4	9	2.44	0	5	40.423	5.337	0.000445025	0.000946457	0.2846	0.2813
AT1G15772.2	protein_coding	-	-	0	0	1	28	17	22	0	0	1	19	19	22	10.14	0	20	40.368	5.335	1.23131e-09	4.13705e-09	0.1302	0.1589
AT5G59270.2	protein_coding	LecRK-II.2	L-type lectin receptor kinase II.2	0	0	0	8	4	5	0	0	0	6	4	5	2.48	0	5	40.377	5.335	0.000250998	0.000549349	0.267	0.2733
AT1G68040.1	protein_coding	-	-	0	0	0	7	2	8	0	0	0	5	2	8	2.48	0	5	40.173	5.328	0.000322194	0.000696668	0.2683	0.2732
AT1G43910.1	protein_coding	-	-	151	208	143	8715	7646	8701	192	224	156	6040	8455	8512	3929.7	191	7669	40.06	5.324	7.55711e-173	1.47818e-170	0.0168	0.0132
AT1G06883.1	lncRNA			0	0	0	4	7	4	0	0	0	3	8	4	2.4	0	5	39.901	5.318	0.000373355	0.000800852	0.2831	0.2815
AT1G76470.1	protein_coding	-	-	2	3	1	91	114	97	3	3	1	63	126	95	48.48	2	95	39.807	5.315	1.19975e-29	9.53357e-29	0.0479	0.0501
AT5G22540.1	protein_coding	-	-	10	5	3	247	340	327	13	5	3	171	376	320	148.07	7	289	39.775	5.314	6.74013e-49	9.1563e-48	0.0402	0.0216
AT3G02945.1	lncRNA			0	0	0	7	7	2	0	0	0	5	8	2	2.42	0	5	39.369	5.299	0.000391346	0.000837644	0.2758	0.2774
at2g19425	miRNA	MIR156G	MIR156G; miRNA	0	0	0	8	2	7	0	0	0	6	2	7	2.43	0	5	39.255	5.295	0.000343268	0.00073949	0.2684	0.2734
AT4G40010.1	protein_coding	SNRK2.7, SRK2F, SNRK2-7	SNF1-related protein kinase 2.7, SUCROSE NONFERMENTING 1-RELATED PROTEIN KINASE 2-7	27	21	25	1694	897	1156	34	23	27	1174	992	1131	563.5	28	1099	39.258	5.295	6.24161e-167	1.09115e-164	0.0123	0.0148
AT2G22750.3	protein_coding	-	-	0	0	0	10	1	7	0	0	0	7	1	7	2.48	0	5	39.19	5.292	0.00038742	0.000829686	0.2621	0.2695
AT2G32140.1	protein_coding	-	-	7	9	7	373	364	386	9	10	8	258	402	378	177.47	9	346	39.176	5.292	2.27961e-78	5.85519e-77	0.0216	0.0198
AT1G51920.1	protein_coding	-	-	0	0	0	2	7	5	0	0	0	1	8	5	2.34	0	5	39.059	5.288	0.000519554	0.00109604	0.292	0.2859
AT5G45810.1	protein_coding	SnRK3.5, CIPK19	CBL-interacting protein kinase 19, SNF1-RELATED PROTEIN KINASE 3.5	10	15	9	585	526	544	13	16	10	405	582	532	259.65	13	506	39.077	5.288	1.06607e-101	4.72567e-100	0.0177	0.0174
AT3G28007.1	protein_coding	AtSWEET4, SWEET4		9	21	11	696	561	720	11	23	12	482	620	704	308.84	15	602	38.901	5.282	2.12134e-109	1.06337e-107	0.0173	0.0167
AT2G24560.2	protein_coding	-	-	0	0	0	5	7	3	0	0	0	3	8	3	2.36	0	5	38.82	5.279	0.000430296	0.000916804	0.2849	0.2816
AT3G01035.1	lncRNA			0	0	0	2	6	6	0	0	0	1	7	6	2.32	0	5	38.794	5.278	0.000515035	0.00108708	0.2919	0.2859
AT4G10960.1	protein_coding	UGE5	UDP-D-glucose/UDP-D-galactose 4-epimerase 5	39	24	24	1670	1203	1421	50	26	26	1157	1330	1390	663.23	34	1292	38.769	5.277	1.71499e-126	1.25055e-124	0.0186	0.0144
AT4G03950.1	protein_coding	-	-	0	0	1	35	13	20	0	0	1	24	14	20	9.88	0	19	38.6	5.271	2.31479e-09	7.63885e-09	0.1299	0.1583
AT5G40680.1	protein_coding	-	-	0	0	0	2	5	7	0	0	0	1	6	7	2.29	0	5	38.392	5.263	0.000542635	0.00114158	0.2922	0.286
AT2G23440.1	protein_coding	-	-	0	0	0	7	0	10	0	0	0	5	0	10	2.44	0	5	38.372	5.262	0.00067231	0.00140103	0.2658	0.2733
AT3G63060.1	protein_coding	EDL3	EID1-like 3	4	0	2	132	67	112	5	0	2	91	74	110	47.07	2	92	38.308	5.26	1.0086e-27	7.50903e-27	0.0536	0.0501
AT2G41342.1	protein_coding	-	-	0	0	2	34	35	36	0	0	2	24	39	35	16.61	1	33	38.239	5.257	4.44593e-13	1.82022e-12	0.1018	0.1192
AT4G23150.1	protein_coding	CRK7	cysteine-rich RLK (RECEPTOR-like protein kinase) 7	6	2	2	168	198	130	8	2	2	116	219	127	79.09	4	154	38.249	5.257	5.79443e-37	5.7433e-36	0.0448	0.0326
AT5G25110.1	protein_coding	CIPK25, SnRK3.25	CBL-interacting protein kinase 25, SNF1-RELATED PROTEIN KINASE 3.25	15	27	24	1476	824	969	19	29	26	1023	911	948	492.72	25	961	38.179	5.255	2.31467e-153	2.82723e-151	0.013	0.0152
AT2G33380.1	protein_coding	AtRD20, PXG3, CLO-3, CLO3, RD20, AtCLO3	caleosin 3, Arabidopsis thaliana caleosin 3, peroxygenase 3, RESPONSIVE TO DESICCATION 20	26	26	28	1520	1184	1166	33	28	31	1053	1309	1141	599.15	31	1168	38.15	5.254	2.07778e-164	3.3594e-162	0.0127	0.0147
AT3G46190.2	protein_coding	-	-	0	0	0	3	7	4	0	0	0	2	8	4	2.29	0	5	38.098	5.252	0.000541418	0.00113933	0.2939	0.286
AT3G60415.1	protein_coding	-	-	48	34	28	1377	2132	1777	61	37	31	954	2357	1738	863.07	43	1683	37.981	5.247	1.01046e-59	1.76647e-58	0.0455	0.0137
AT3G10320.1	protein_coding	MUCI21	MUCILAGE-RELATED 21	26	20	17	1073	934	1017	33	21	19	744	1033	995	474.08	24	924	37.959	5.246	1.5788e-125	1.1411e-123	0.0168	0.0153
AT5G06775.1	lncRNA			0	0	1	11	16	29	0	0	1	8	18	28	9.13	0	18	37.671	5.235	1.66099e-08	5.1777e-08	0.142	0.1731
AT2G14210.2	protein_coding	ANR1, AGL44	ARABIDOPSIS NITRATE REGULATED 1, AGAMOUS-like 44	3	0	0	44	46	69	4	0	0	30	51	67	25.45	1	49	37.629	5.234	1.64532e-15	7.63459e-15	0.0978	0.0872
AT5G57380.1	protein_coding	VIN3	VERNALIZATION INSENSITIVE 3	0	0	0	6	7	2	0	0	0	4	8	2	2.31	0	5	37.647	5.234	0.000529972	0.00111693	0.2854	0.2817
AT4G09965.1	protein_coding	-	-	0	0	0	6	6	3	0	0	0	4	7	3	2.29	0	5	37.588	5.232	0.000459445	0.000975049	0.2843	0.2818
AT5G37610.1	protein_coding	-	-	0	0	0	3	5	6	0	0	0	2	6	6	2.25	0	5	37.567	5.231	0.000529765	0.00111657	0.2935	0.2861
AT5G49690.1	protein_coding	-	-	12	2	7	295	344	366	15	2	8	204	380	358	161.32	8	314	37.561	5.231	6.31976e-44	7.51254e-43	0.048	0.0207
AT1G01520.4	protein_coding	ASG4	ALTERED SEED GERMINATION 4	14	7	13	726	435	497	18	8	14	503	481	486	251.65	13	490	37.499	5.229	4.72028e-96	1.82615e-94	0.0189	0.0175
AT4G14060.1	protein_coding	-	-	43	17	21	1387	990	1404	55	18	23	961	1095	1373	587.56	32	1143	37.464	5.227	1.15735e-73	2.73877e-72	0.0345	0.0147
AT3G25010.2	protein_coding	AtRLP41, RLP41	receptor like protein 41	13	8	11	652	476	416	17	9	12	452	526	407	237.05	13	462	37.278	5.22	2.50738e-90	8.6372e-89	0.02	0.0179
AT3G26820.2	protein_coding	-	-	1	3	2	93	94	97	1	3	2	64	104	95	44.99	2	88	37.276	5.22	1.92413e-28	1.46568e-27	0.0484	0.0532
AT1G13340.1	protein_coding	ISTL6	IST1-LIKE 6	37	25	33	1425	1498	1514	47	27	36	988	1656	1481	705.85	37	1375	37.054	5.212	3.77818e-110	1.92144e-108	0.0218	0.0142
AT1G17020.1	protein_coding	ATSRG1, SRG1	SENESCENCE-RELATED GENE 1, senescence-related gene 1	61	64	67	3420	2632	2895	78	69	73	2370	2910	2832	1388.7	73	2704	36.859	5.204	4.40519e-196	1.31082e-193	0.0125	0.0128
AT2G41225.1	protein_coding	ARL3, OSR2	ARGOS-Like3, ORGAN SIZE RELATED 2	0	0	0	4	9	1	0	0	0	3	10	1	2.28	0	5	36.82	5.202	0.000933857	0.00191558	0.2976	0.2861
AT2G04050.1	protein_coding	-	-	6	87	7	804	840	875	8	93	8	557	929	856	408.46	36	781	36.517	5.191	1.0472e-24	7.05472e-24	0.109	0.0158
AT4G21120.2	protein_coding	AtCAT1, CAT1, AAT1	amino acid transporter 1, CATIONIC AMINO ACID TRANSPORTER 1	26	26	21	1244	1007	1101	33	28	23	862	1113	1077	522.78	28	1017	36.359	5.184	8.95679e-147	9.82472e-145	0.0138	0.0151
AT1G13520.1	protein_coding	-	-	6	0	0	105	87	85	8	0	0	73	96	83	43.29	3	84	36.291	5.182	5.31954e-19	2.89368e-18	0.0979	0.0547
AT3G57680.1	protein_coding	-	-	37	46	41	2758	1516	1614	47	49	45	1911	1676	1579	884.66	47	1722	36.279	5.181	1.77112e-189	4.54496e-187	0.0117	0.0136
AT2G34360.1	protein_coding	-	-	2	5	2	176	113	138	3	5	2	122	125	135	65.34	3	127	36.223	5.179	8.25703e-37	8.14377e-36	0.04	0.0377
AT1G02230.1	protein_coding	ANAC004, NAC004	NAC domain containing protein 4	5	9	4	283	277	248	6	10	4	196	306	243	127.57	7	248	36.16	5.176	1.97111e-60	3.53422e-59	0.0264	0.0233
AT1G22160.1	protein_coding	-	-	60	65	126	4065	3167	3741	76	70	138	2817	3502	3660	1710.45	95	3326	35.993	5.17	5.18784e-155	6.68705e-153	0.0168	0.0126
AT2G09740.1	lncRNA			0	0	0	1	4	8	0	0	0	1	4	8	2.16	0	4	35.948	5.168	0.000971245	0.00198819	0.308	0.2908
AT1G51010.1	protein_coding	-	-	0	0	0	2	5	6	0	0	0	1	6	6	2.13	0	4	35.742	5.16	0.000785685	0.00162535	0.3041	0.2909
AT1G20803.1	protein_coding	-	-	0	0	0	7	3	5	0	0	0	5	3	5	2.18	0	4	35.559	5.152	0.000549698	0.0011558	0.2843	0.282
AT2G27780.1	protein_coding	-	-	0	0	0	7	3	5	0	0	0	5	3	5	2.18	0	4	35.559	5.152	0.000550022	0.00115639	0.2844	0.282
AT5G39670.1	protein_coding	-	-	26	28	16	747	1095	1319	33	30	17	518	1211	1290	516.58	27	1006	35.449	5.148	1.27521e-73	3.01257e-72	0.0322	0.0151
AT4G30830.1	protein_coding	-	-	9	10	10	726	335	335	11	11	11	503	370	328	205.74	11	400	35.339	5.143	8.84971e-86	2.72017e-84	0.0196	0.0186
AT1G76480.2	protein_coding	-	-	2	0	0	29	32	42	3	0	0	20	35	41	16.52	1	32	35.219	5.138	4.97127e-12	1.92966e-11	0.1132	0.1204
AT3G48630.1	protein_coding	-	-	0	0	0	1	3	9	0	0	0	1	3	9	2.14	0	4	35.222	5.138	0.00118081	0.00239319	0.311	0.2908
AT3G50770.1	protein_coding	CML41	calmodulin-like 41	32	32	35	1207	1530	1603	41	34	38	836	1692	1568	701.64	38	1365	35.113	5.134	2.13978e-126	1.55057e-124	0.0178	0.0142
AT5G46871.1	protein_coding	-	-	0	5	2	94	96	107	0	5	2	65	106	105	47.25	2	92	34.843	5.123	1.57292e-27	1.16577e-26	0.0526	0.0509
AT5G24200.2	protein_coding	-	-	18	9	15	684	654	526	23	10	16	474	723	515	293.46	16	571	34.78	5.12	4.0902e-86	1.26837e-84	0.0228	0.0169
AT5G47850.1	protein_coding	CCR4	CRINKLY4 related 4	0	0	1	14	16	23	0	0	1	10	18	22	8.5	0	17	34.722	5.118	3.46086e-08	1.05325e-07	0.1473	0.1782
AT1G70390.1	protein_coding	-	-	0	1	1	30	41	24	0	1	1	21	45	23	15.3	1	30	34.607	5.113	2.0916e-12	8.27265e-12	0.0966	0.127
AT4G31970.1	protein_coding	CYP82C2	"cytochrome P450, family 82, subfamily C, polypeptide 2"	0	0	0	3	10	0	0	0	0	2	11	0	2.19	0	4	34.576	5.112	0.00188341	0.00371908	0.3012	0.2908
AT1G80130.1	protein_coding	-	-	81	149	67	6946	2292	4273	103	160	73	4814	2534	4180	1977.45	112	3843	34.426	5.105	7.6147e-63	1.4499e-61	0.044	0.0125
AT4G02280.1	protein_coding	SUS3, ATSUS3	sucrose synthase 3	106	80	106	5744	3445	3768	135	86	116	3981	3809	3686	1968.82	112	3825	34.411	5.105	2.69525e-188	6.85353e-186	0.0135	0.0125
AT3G57540.1	protein_coding	AtREM4.1, REM4.1	remorin group 4 1	48	19	33	1734	1244	1337	61	20	36	1202	1376	1308	667.14	39	1295	34.375	5.103	6.86636e-93	2.49104e-91	0.026	0.0144
AT5G39810.1	protein_coding	AGL98	AGAMOUS-like 98	0	0	0	1	7	4	0	0	0	1	8	4	2.06	0	4	34.352	5.102	0.00124424	0.00251374	0.3158	0.2958
AT5G05220.1	protein_coding	-	-	0	0	0	6	4	4	0	0	0	4	4	4	2.08	0	4	34.324	5.101	0.00069079	0.00143798	0.2962	0.2866
at1g62035	miRNA	MIR171C	MIR171C; miRNA	0	0	0	1	6	5	0	0	0	1	7	5	2.04	0	4	34.19	5.096	0.00118683	0.00240434	0.3152	0.2958
AT1G30925.1	protein_coding	-	-	0	0	0	4	6	3	0	0	0	3	7	3	2.06	0	4	34.109	5.092	0.000889642	0.00182797	0.3077	0.2911
AT4G22880.2	protein_coding	LDOX, TT18, TDS4, ANS	leucoanthocyanidin dioxygenase, ANTHOCYANIDIN SYNTHASE, TANNIN DEFICIENT SEED 4	170	198	125	10538	5126	6224	217	213	137	7303	5668	6089	3270.96	189	6353	33.982	5.087	6.36468e-172	1.21106e-169	0.0156	0.0129
AT4G12810.1	protein_coding	-	-	0	0	0	3	3	7	0	0	0	2	3	7	2.04	0	4	33.886	5.083	0.000971358	0.00198828	0.3087	0.2911
AT4G22210.1	protein_coding	LCR85	low-molecular-weight cysteine-rich 85	3	0	0	56	30	58	4	0	0	39	33	57	22.09	1	43	33.755	5.077	1.15445e-14	5.14517e-14	0.0958	0.0953
AT5G26170.1	protein_coding	WRKY50, ATWRKY50	WRKY DNA-binding protein 50, ARABIDOPSIS THALIANA WRKY DNA-BINDING PROTEIN 50	4	1	1	68	87	113	5	1	1	47	96	111	43.52	2	85	33.703	5.075	7.33432e-23	4.64346e-22	0.0657	0.0553
AT3G10815.1	protein_coding	-	-	1	3	8	159	163	167	1	3	9	110	180	163	77.84	4	151	33.608	5.071	5.00778e-38	5.0954e-37	0.0412	0.0329
AT1G13310.1	protein_coding	-	-	2	0	0	32	31	35	3	0	0	22	34	34	15.54	1	30	33.555	5.068	1.21842e-11	4.62045e-11	0.1153	0.1248
AT3G47480.1	protein_coding	-	-	33	23	39	949	1567	1536	42	25	43	658	1733	1503	667.06	37	1298	33.503	5.066	1.0761e-69	2.36632e-68	0.0351	0.0144
AT2G47950.2	protein_coding	-	-	0	2	0	35	24	36	0	2	0	24	27	35	14.69	1	29	33.367	5.06	1.3054e-11	4.94092e-11	0.1119	0.1279
AT5G65600.1	protein_coding	LecRK-IX.2	L-type lectin receptor kinase IX.2	13	11	17	706	484	555	17	12	19	489	535	543	269.06	16	522	33.319	5.058	3.8724e-101	1.70039e-99	0.0172	0.0172
AT5G06520.1	protein_coding	-	-	0	0	0	6	2	6	0	0	0	4	2	6	2.04	0	4	33.282	5.057	0.000889982	0.00182854	0.2983	0.2866
AT5G32460.1	protein_coding	-	-	0	0	0	11	2	3	0	0	0	8	2	3	2.13	0	4	33.271	5.056	0.00087494	0.00179882	0.2847	0.2781
AT2G17710.1	protein_coding	-	-	108	164	146	6092	5112	6073	138	176	160	4222	5653	5941	2714.8	158	5272	33.249	5.055	3.04894e-214	1.29215e-211	0.012	0.0126
AT5G45120.1	protein_coding	-	-	0	0	0	7	0	8	0	0	0	5	0	8	2.11	0	4	33.249	5.055	0.00127877	0.00257977	0.2829	0.2821
AT5G25260.1	protein_coding	-	-	9	6	7	293	290	334	11	6	8	203	321	327	146	8	284	32.998	5.044	4.46139e-61	8.15086e-60	0.0269	0.0217
AT3G03430.1	protein_coding	-	-	1	0	0	15	18	21	1	0	0	10	20	21	8.69	0	17	32.903	5.04	5.03979e-08	1.51562e-07	0.1522	0.1766
AT1G53930.1	protein_coding	-	-	0	0	0	9	2	4	0	0	0	6	2	4	2.06	0	4	32.885	5.039	0.000873263	0.00179564	0.289	0.2823
AT1G24140.1	protein_coding	-	-	9	6	6	279	268	326	11	6	7	193	296	319	138.85	8	269	32.768	5.034	1.50434e-57	2.50912e-56	0.0287	0.0222
AT2G27940.1	protein_coding	-	-	0	0	0	2	4	6	0	0	0	1	4	6	1.95	0	4	32.65	5.029	0.00122463	0.00247715	0.3159	0.2961
AT2G14670.1	protein_coding	SUC8, ATSUC8	sucrose-proton symporter 8	0	0	0	5	4	4	0	0	0	3	4	4	1.97	0	4	32.632	5.028	0.000947049	0.00194108	0.3089	0.2913
AT1G22990.1	protein_coding	HIPP22	heavy metal associated isoprenylated plant protein 22	2	1	4	109	74	112	3	1	4	76	82	110	45.82	3	89	32.475	5.021	7.36719e-28	5.51278e-27	0.0484	0.0518
AT2G21820.1	protein_coding	-	-	1	5	0	124	68	66	1	5	0	86	75	65	38.72	2	75	32.414	5.019	3.06842e-22	1.89379e-21	0.0663	0.0592
AT3G05085.1	lncRNA			0	1	0	24	18	11	0	1	0	17	20	11	8.06	0	16	32.433	5.019	6.31241e-08	1.88778e-07	0.1477	0.1792
AT3G21890.1	protein_coding	BBX31, miP1b	microProtein 1b, B-box domain protein 31	6	7	8	398	211	286	8	8	9	276	233	280	135.47	8	263	32.374	5.017	5.91347e-64	1.14626e-62	0.0239	0.0224
AT2G30650.2	protein_coding	-	-	0	0	0	3	6	3	0	0	0	2	7	3	1.94	0	4	32.323	5.014	0.00124496	0.00251482	0.3154	0.2961
AT2G44581.1	protein_coding	-	-	0	0	0	3	6	3	0	0	0	2	7	3	1.94	0	4	32.323	5.014	0.0012428	0.00251136	0.315	0.2961
at4g07565	miRNA			0	0	0	3	7	2	0	0	0	2	8	2	1.96	0	4	32.295	5.013	0.00145189	0.00291243	0.3181	0.2961
AT4G37295.1	protein_coding	-	-	12	5	7	386	268	343	15	5	8	268	296	336	154.62	9	300	32.232	5.01	1.10768e-60	2.00407e-59	0.0281	0.021
AT2G29950.1	protein_coding	ELF4-L1	ELF4-like 1	3	2	2	138	60	112	4	2	2	96	66	110	46.62	3	91	32.151	5.007	3.04293e-28	2.30598e-27	0.047	0.0503
AT4G10500.1	protein_coding	DLO1	DMR6-LIKE OXYGENASE 1	9	2	2	204	180	152	11	2	2	141	199	149	84.15	5	163	32.129	5.006	3.29807e-33	2.94072e-32	0.0529	0.0308
AT4G17670.1	protein_coding	-	-	48	46	45	1947	1716	1937	61	49	49	1349	1897	1895	883.57	53	1714	31.988	4.999	8.34862e-150	9.5314e-148	0.0149	0.0136
AT5G09610.1	protein_coding	PUM21, APUM21	pumilio 21	0	0	0	14	1	2	0	0	0	10	1	2	2.13	0	4	31.842	4.993	0.00107717	0.0021922	0.2305	0.2742
AT2G13760.1	protein_coding	-	-	0	1	0	8	15	25	0	1	0	6	17	24	7.94	0	16	31.824	4.992	2.15404e-07	6.1929e-07	0.158	0.1862
AT3G26790.1	protein_coding	FUS3	FUSCA 3	1	0	0	24	16	14	1	0	0	17	18	14	8.22	0	16	31.806	4.991	5.86624e-08	1.75792e-07	0.1491	0.1776
AT4G39403.1	protein_coding	PLS	POLARIS	0	0	0	6	5	2	0	0	0	4	6	2	1.94	0	4	31.726	4.988	0.00119105	0.00241272	0.311	0.2914
AT5G24080.1	protein_coding	-	-	0	2	0	57	22	21	0	2	0	40	24	21	14.42	1	28	31.732	4.988	2.65069e-11	9.8528e-11	0.1103	0.1253
AT2G34610.1	protein_coding	-	-	3	1	3	118	63	115	4	1	3	82	70	112	45.35	3	88	31.648	4.984	1.78908e-27	1.32177e-26	0.0483	0.052
AT5G60770.1	protein_coding	NRT2.4, ATNRT2.4	ARABIDOPSIS THALIANA NITRATE TRANSPORTER 2.4, nitrate transporter 2.4	3	0	0	41	28	67	4	0	0	28	31	66	21.46	1	42	31.535	4.979	4.39068e-13	1.79838e-12	0.1095	0.0987
AT3G29635.1	protein_coding	-	-	0	0	0	4	1	8	0	0	0	3	1	8	1.95	0	4	31.489	4.977	0.00163975	0.00326468	0.3142	0.2913
AT5G59050.2	protein_coding	-	-	112	127	148	6651	4192	4726	143	136	162	4609	4635	4623	2384.79	147	4622	31.467	4.976	1.69512e-212	6.5853e-210	0.0116	0.0126
AT1G35230.1	protein_coding	AGP5	arabinogalactan protein 5	3	2	3	94	111	115	4	2	3	65	123	112	51.61	3	100	31.452	4.975	3.51873e-29	2.75615e-28	0.0471	0.0473
AT5G18510.1	protein_coding	-	-	1	0	0	27	7	22	1	0	0	19	8	22	8.21	0	16	31.424	4.974	9.20319e-08	2.71371e-07	0.1468	0.1749
AT5G59320.1	protein_coding	LTP3	lipid transfer protein 3	51	78	66	5327	1619	1950	65	84	72	3692	1790	1908	1268.41	74	2463	31.342	4.97	8.10566e-100	3.44565e-98	0.025	0.0129
AT3G15500.1	protein_coding	NAC3, ATNAC3, NAC055, ANAC055	NAC domain containing protein 3, NAC domain containing protein 55	47	32	35	1310	1589	1614	60	34	38	908	1757	1579	729.39	44	1415	31.324	4.969	1.70632e-74	4.10029e-73	0.0324	0.0141
AT5G39110.1	protein_coding	-	-	0	0	2	24	31	29	0	0	2	17	34	28	13.58	1	26	31.272	4.967	1.05536e-10	3.79182e-10	0.1192	0.1372
AT1G22480.1	protein_coding	-	-	0	0	0	2	2	8	0	0	0	1	2	8	1.9	0	4	31.264	4.966	0.00178437	0.00353475	0.3202	0.2961
AT2G29370.1	protein_coding	-	-	28	39	37	1652	1129	1327	36	42	40	1145	1248	1298	634.9	39	1230	31.166	4.962	4.15932e-168	7.50583e-166	0.0116	0.0145
AT3G60470.1	protein_coding	-	-	0	0	0	10	1	4	0	0	0	7	1	4	1.99	0	4	31.126	4.96	0.00130881	0.0026379	0.2927	0.2825
at4g30972	miRNA	MIR156B	MIR156B; miRNA	0	0	0	10	1	4	0	0	0	7	1	4	1.99	0	4	31.125	4.96	0.00130925	0.00263859	0.2927	0.2825
AT4G03450.1	protein_coding	-	-	2	6	1	113	122	107	3	6	1	78	135	105	54.66	3	106	31.034	4.956	4.93711e-30	3.98086e-29	0.0472	0.0447
AT3G09120.1	protein_coding	-	-	0	0	0	14	0	3	0	0	0	10	0	3	2.11	0	4	31.005	4.954	0.00186302	0.00368063	0.2825	0.2742
AT5G06760.1	protein_coding	LEA4-5, AtLEA4-5	Late Embryogenesis Abundant 4-5	5	6	9	469	177	216	6	6	10	325	196	211	125.78	7	244	30.87	4.948	5.63711e-56	9.10894e-55	0.0276	0.0232
AT2G40750.1	protein_coding	WRKY54, ATWRKY54	WRKY DNA-binding protein 54, WRKY DNA-BINDING PROTEIN 54	12	16	14	489	514	589	15	17	15	339	568	576	255.2	16	494	30.72	4.941	2.66854e-94	1.00056e-92	0.0177	0.0175
AT4G28815.2	protein_coding	-	-	0	0	0	4	3	5	0	0	0	3	3	5	1.83	0	4	30.479	4.93	0.00138974	0.00279315	0.3174	0.2964
AT5G10760.1	protein_coding	AED1	APOPLASTIC, EDS1-DEPENDENT 1	40	63	33	1780	1718	1562	51	68	36	1234	1900	1528	802.67	52	1554	30.29	4.921	1.75099e-151	2.06654e-149	0.014	0.0139
AT3G58550.1	protein_coding	-	-	90	92	60	3191	2614	3425	115	99	66	2211	2890	3351	1455.25	93	2817	30.274	4.92	1.27217e-101	5.62146e-100	0.0246	0.0127
AT1G35210.1	protein_coding	-	-	11	16	13	404	532	536	14	17	14	280	588	524	239.67	15	464	30.192	4.916	3.83154e-87	1.21235e-85	0.019	0.0178
AT2G31700.1	protein_coding	-	-	0	0	0	7	3	3	0	0	0	5	3	3	1.85	0	4	30.12	4.913	0.00135909	0.0027349	0.3119	0.2916
AT5G40800.1	protein_coding	-	-	0	0	0	9	2	3	0	0	0	6	2	3	1.9	0	4	30.122	4.913	0.00141417	0.00284103	0.3044	0.287
AT4G16640.1	protein_coding	-	-	5	10	5	225	221	298	6	11	5	156	244	292	119.07	7	231	30.034	4.909	3.25779e-52	4.75593e-51	0.0295	0.0243
AT5G10625.1	protein_coding	-	-	15	12	12	441	477	551	19	13	13	306	527	539	236.2	15	457	29.975	4.906	4.35187e-76	1.07627e-74	0.0233	0.0179
at1g71002	miRNA	MIR858A	MIR858a; miRNA	2	0	0	39	23	27	3	0	0	27	25	26	13.57	1	26	29.969	4.905	9.75048e-11	3.51095e-10	0.1179	0.1337
AT4G25040.1	protein_coding	CASPL1F1	CASP-like protein 1F1	0	0	0	5	4	3	0	0	0	3	4	3	1.8	0	3	29.884	4.901	0.00146971	0.0029452	0.3182	0.2965
AT2G14610.1	protein_coding	PR1, ATPR1, AtCAPE9, PR 1	PATHOGENESIS-RELATED GENE 1, pathogenesis-related gene 1	11	43	9	379	1158	541	14	46	10	263	1280	529	357.07	23	691	29.859	4.9	3.72952e-102	1.66909e-100	0.0165	0.0162
AT3G25882.1	protein_coding	NIMIN-2	NIM1-interacting 2	12	24	27	702	775	792	15	26	30	486	857	775	364.8	24	706	29.866	4.9	9.98117e-125	7.03232e-123	0.0137	0.0161
AT1G35630.1	protein_coding	-	-	0	0	0	7	2	4	0	0	0	5	2	4	1.83	0	4	29.658	4.89	0.00149636	0.00299539	0.3126	0.2917
AT2G19810.1	protein_coding	AtOZF1, TZF2, AtTZF2, OZF1	tandem zinc finger 2, Oxidation-related Zinc Finger 1	164	220	203	9629	6172	6439	209	236	222	6673	6825	6299	3410.66	222	6599	29.645	4.89	2.66412e-213	1.07997e-210	0.0117	0.0129
AT4G05540.1	protein_coding	-	-	0	0	0	5	3	4	0	0	0	3	3	4	1.78	0	3	29.539	4.885	0.0015226	0.00304466	0.3193	0.2965
AT4G25719.1	lncRNA		other RNA	0	0	0	9	1	4	0	0	0	6	1	4	1.88	0	4	29.535	4.884	0.00168902	0.00335657	0.3049	0.2871
AT5G52750.2	protein_coding	-	-	57	37	27	1468	1365	1600	73	40	30	1017	1509	1565	705.63	48	1364	29.502	4.883	2.80343e-64	5.47588e-63	0.0374	0.0142
AT5G36110.2	protein_coding	CYP716A1	"cytochrome P450, family 716, subfamily A, polypeptide 1"	1	0	5	73	70	76	1	0	5	51	77	74	34.85	2	67	29.424	4.879	1.45151e-19	8.07483e-19	0.0742	0.0666
AT3G61900.1	protein_coding	SAUR33	SMALL AUXIN UPREGULATED RNA 33	13	11	7	465	373	325	17	12	8	322	412	318	181.44	12	351	29.399	4.878	1.8351e-71	4.15625e-70	0.0227	0.0196
AT5G02695.1	lncRNA			0	0	0	3	6	2	0	0	0	2	7	2	1.78	0	4	29.406	4.878	0.00212383	0.00416503	0.335	0.3015
AT1G07645.1	protein_coding	DSI-1VOC, ATDSI-1VOC	desiccation-induced 1VOC superfamily protein	0	0	0	3	5	3	0	0	0	2	6	3	1.76	0	4	29.383	4.877	0.00189092	0.00373208	0.3339	0.3015
AT5G27420.1	protein_coding	CNI1, ATL31	Arabidopsis toxicos en levadura 31, carbon/nitrogen insensitive 1	50	29	46	1501	1419	1681	64	31	50	1040	1569	1644	733.14	48	1418	29.318	4.874	4.68531e-89	1.56387e-87	0.0258	0.0141
AT5G53680.1	protein_coding	-	-	0	0	0	0	5	5	0	0	0	0	6	5	1.74	0	4	29.299	4.873	0.00258974	0.00501923	0.3155	0.3068
AT3G04420.1	protein_coding	anac048, NAC048	NAC domain containing protein 48	9	19	17	603	511	513	11	20	19	418	565	502	255.87	17	495	29.191	4.867	1.021e-96	4.01103e-95	0.017	0.0175
AT3G20900.1	protein_coding	-	-	0	0	0	3	4	4	0	0	0	2	4	4	1.74	0	3	29.154	4.866	0.00185355	0.0036627	0.3335	0.3016
AT2G46400.1	protein_coding	ATWRKY46, WRKY46	WRKY DNA-binding protein 46, WRKY DNA-BINDING PROTEIN 46	72	31	38	1694	1583	1704	92	33	42	1174	1750	1667	792.98	56	1530	29.115	4.864	8.98459e-54	1.37402e-52	0.0458	0.0139
AT3G46660.1	protein_coding	UGT76E12	UDP-glucosyl transferase 76E12	20	21	17	733	623	770	25	23	19	508	689	753	336.13	22	650	29.107	4.863	1.24981e-106	6.01692e-105	0.0165	0.0164
AT1G04570.1	protein_coding	-	-	17	17	24	1180	498	606	22	18	26	818	551	593	337.9	22	654	29.064	4.861	7.61536e-113	4.09633e-111	0.0153	0.0164
AT1G21000.1	protein_coding	-	-	307	334	341	13442	10411	12136	391	359	373	9316	11512	11872	5637.06	374	10900	28.991	4.858	2.75198e-174	5.45927e-172	0.0148	0.0141
AT1G50880.1	protein_coding	-	-	0	0	0	5	2	5	0	0	0	3	2	5	1.76	0	3	28.987	4.857	0.00175231	0.00347468	0.3206	0.2966
AT3G03620.2	protein_coding	-	-	0	0	0	0	4	6	0	0	0	0	4	6	1.72	0	3	28.882	4.852	0.00276317	0.00533134	0.3165	0.3068
AT3G57950.1	protein_coding	-	-	10	9	10	395	312	353	13	10	11	274	345	345	166.23	11	321	28.779	4.847	8.21689e-70	1.80972e-68	0.0223	0.0203
AT1G74590.1	protein_coding	GSTU10, ATGSTU10	GLUTATHIONE S-TRANSFERASE TAU 10, glutathione S-transferase TAU 10	12	6	8	328	288	336	15	6	9	227	318	329	150.82	10	291	28.738	4.845	2.1706e-56	3.5443e-55	0.0294	0.0213
AT5G58830.1	protein_coding	-	-	0	0	0	2	2	7	0	0	0	1	2	7	1.74	0	3	28.741	4.845	0.00251496	0.00488309	0.3384	0.3015
AT1G59171.1	protein_coding	-	-	0	0	0	6	4	2	0	0	0	4	4	2	1.76	0	3	28.73	4.844	0.00182882	0.00361743	0.3221	0.2966
AT1G32900.1	protein_coding	GBSS1	granule bound starch synthase 1	541	626	564	32769	14762	18498	689	673	616	22710	16323	18096	9851.13	659	19043	28.618	4.839	1.74137e-161	2.706e-159	0.0163	0.0162
AT4G33450.1	protein_coding	ATMYB69, MYB69	MYB DOMAIN PROTEIN 69, myb domain protein 69	5	1	0	83	54	93	6	1	0	58	60	91	35.94	2	70	28.559	4.836	7.44984e-18	3.87755e-17	0.0871	0.0643
AT1G24230.1	protein_coding	-	-	0	0	0	1	5	4	0	0	0	1	6	4	1.69	0	4	28.471	4.831	0.00261644	0.00506642	0.3375	0.3069
AT3G07970.1	protein_coding	QRT2	QUARTET 2	8	7	10	393	227	303	10	8	11	272	251	296	141.4	10	273	28.394	4.828	7.23067e-64	1.39868e-62	0.0233	0.0219
AT4G38560.1	protein_coding	-	-	9	12	6	372	316	272	11	13	7	258	349	266	150.7	10	291	28.214	4.818	5.35884e-65	1.06837e-63	0.0234	0.0213
AT5G11920.3	protein_coding	AtcwINV6, cwINV6	6-&1-fructan exohydrolase	17	34	5	745	535	593	22	37	5	516	592	580	291.94	21	563	28.18	4.817	3.94807e-56	6.40553e-55	0.0374	0.0169
AT4G07235.1	lncRNA			0	0	0	4	4	3	0	0	0	3	4	3	1.69	0	3	28.173	4.816	0.00205014	0.00402812	0.3346	0.3017
AT2G28860.1	protein_coding	CYP710A4	cytochrome P450, family 710, subfamily A, polypeptide 4	9	4	0	172	114	186	11	4	0	119	126	182	73.83	5	142	28.099	4.812	5.27823e-25	3.58517e-24	0.0724	0.0342
AT1G01680.1	protein_coding	ATPUB54, PUB54	plant U-box 54, PLANT U-BOX 54	12	3	5	231	278	209	15	3	5	160	307	204	115.99	8	224	28.071	4.811	2.9785e-33	2.66001e-32	0.0561	0.0247
AT5G16453.1	protein_coding	-	-	0	0	0	6	2	4	0	0	0	4	2	4	1.71	0	3	28.023	4.809	0.00197207	0.00388265	0.3238	0.2967
AT5G56510.1	protein_coding	APUM12, PUM12	pumilio 12	1	2	0	41	37	35	1	2	0	28	41	34	17.83	1	34	27.95	4.805	2.34581e-13	9.7351e-13	0.0895	0.1129
AT1G07690.2	protein_coding	-	-	0	0	0	8	1	4	0	0	0	6	1	4	1.76	0	4	27.94	4.804	0.00217593	0.00426121	0.3161	0.2919
AT2G17180.1	protein_coding	DAZ1	DUO1-ACTIVATED ZINC FINGER 1	0	0	0	8	1	4	0	0	0	6	1	4	1.76	0	4	27.94	4.804	0.00217287	0.00425553	0.3158	0.2919
AT3G62730.1	protein_coding	-	-	5	4	2	159	98	149	6	4	2	110	108	146	62.86	4	121	27.915	4.803	8.49942e-33	7.47367e-32	0.0424	0.039
AT1G04103.2	lncRNA			0	0	0	4	3	4	0	0	0	3	3	4	1.67	0	3	27.836	4.799	0.00211339	0.00414542	0.3347	0.3018
AT3G61280.1	protein_coding	-	-	10	17	14	576	488	372	13	18	15	399	540	364	224.83	15	434	27.747	4.794	1.12025e-85	3.43956e-84	0.0186	0.0182
AT4G29650.1	protein_coding	-	-	0	0	0	1	3	6	0	0	0	1	3	6	1.65	0	3	27.612	4.787	0.00302762	0.00580715	0.3413	0.307
AT1G67635.1	protein_coding	-	-	0	0	0	9	3	1	0	0	0	6	3	1	1.76	0	3	27.542	4.784	0.00246217	0.00478458	0.3195	0.2919
AT2G40740.3	protein_coding	ATWRKY55, WRKY55	WRKY DNA-binding protein 55, WRKY DNA-BINDING PROTEIN 55	2	0	1	33	46	35	3	0	1	23	51	34	18.6	1	36	27.503	4.782	1.01102e-12	4.06663e-12	0.0982	0.1114
AT5G39130.1	protein_coding	-	-	6	7	2	152	171	194	8	8	2	105	189	190	83.59	6	161	27.469	4.78	8.68887e-37	8.56667e-36	0.0409	0.0312
AT3G57460.1	protein_coding	-	-	3	5	3	132	111	140	4	5	3	91	123	137	60.61	4	117	27.376	4.775	4.46652e-33	3.96487e-32	0.0402	0.0406
AT2G39855.4	protein_coding	-	-	0	0	0	2	4	4	0	0	0	1	4	4	1.62	0	3	27.352	4.774	0.00262653	0.0050842	0.3391	0.3071
AT1G33730.1	protein_coding	CYP76C5	"cytochrome P450, family 76, subfamily C, polypeptide 5"	0	0	0	7	3	2	0	0	0	5	3	2	1.69	0	3	27.303	4.771	0.00226419	0.00442507	0.3265	0.2968
AT5G37600.1	protein_coding	ATGSR1, ATGLN1;1, GLN1;1, GSR 1	ARABIDOPSIS THALIANA GLUTAMINE SYNTHASE CLONE R1, ARABIDOPSIS GLUTAMINE SYNTHASE 1;1, GLUTAMINE SYNTHASE 1;1, glutamine synthase clone R1	1887	2294	1742	78136	57271	67869	2404	2465	1904	54150	63328	66393	31773.9	2258	61290	27.213	4.766	2.15224e-111	1.12734e-109	0.0235	0.0221
AT5G04340.1	protein_coding	AtZAT6, ZAT6, CZF2, C2H2	zinc finger of Arabidopsis thaliana 6, COLD INDUCED ZINC FINGER PROTEIN 2	68	88	83	2483	2644	2962	87	95	91	1721	2924	2898	1302.31	91	2514	27.197	4.765	4.16721e-155	5.39635e-153	0.0143	0.0129
AT2G25625.1	protein_coding	CV	chloroplast vesiculation	98	82	76	3308	2539	2958	125	88	83	2293	2808	2894	1381.62	99	2665	27.157	4.763	9.68576e-130	7.50472e-128	0.0178	0.0128
AT3G55900.1	protein_coding	-	-	0	0	0	8	0	5	0	0	0	6	0	5	1.74	0	4	27.104	4.76	0.00299536	0.0057488	0.3119	0.2919
AT3G15280.1	protein_coding	-	-	0	0	0	5	4	2	0	0	0	3	4	2	1.64	0	3	27.06	4.758	0.00244217	0.00475002	0.3334	0.3019
AT5G60900.1	protein_coding	RLK1	receptor-like protein kinase 1	21	17	7	556	504	459	27	18	8	385	557	449	240.72	18	464	26.972	4.753	6.57302e-65	1.30671e-63	0.0285	0.0178
AT1G28300.1	protein_coding	LEC2, AtLEC2	LEAFY COTYLEDON 2	0	0	0	5	3	3	0	0	0	3	3	3	1.62	0	3	26.83	4.746	0.0023815	0.00463879	0.3335	0.3019
AT4G07165.1	lncRNA			0	0	0	1	2	7	0	0	0	1	2	7	1.63	0	3	26.843	4.746	0.0037444	0.00708719	0.3449	0.3071
AT2G28490.1	protein_coding	-	-	0	0	0	9	1	3	0	0	0	6	1	3	1.71	0	3	26.779	4.743	0.0026928	0.00520312	0.32	0.292
AT1G70581.1	ncRNA		other RNA	6	2	6	158	150	166	8	2	7	109	166	162	75.68	6	146	26.589	4.733	4.85974e-35	4.56914e-34	0.0416	0.0337
AT3G47790.2	protein_coding	ATATH7, ATH7, ABCA8	ABC2 homolog 7, ATP-binding cassette A8	21	12	9	602	357	483	27	13	10	417	395	472	222.32	17	428	26.576	4.732	3.85298e-67	8.00681e-66	0.0263	0.0182
AT5G59220.1	protein_coding	SAG113, HAI1	senescence associated gene 113, highly ABA-induced PP2C gene 1	10	35	22	895	514	814	13	38	24	620	568	796	343.22	25	661	26.548	4.731	2.45648e-79	6.43958e-78	0.0242	0.0163
AT4G03040.1	protein_coding	-	-	0	0	0	0	7	2	0	0	0	0	8	2	1.62	0	3	26.51	4.728	0.00504113	0.00934863	0.3417	0.3127
AT3G60730.1	protein_coding	-	-	0	0	0	3	4	3	0	0	0	2	4	3	1.57	0	3	26.427	4.724	0.00281532	0.00542337	0.3414	0.3073
AT5G07510.2	protein_coding	ATGRP-4, GRP14, ATGRP14, GRP-4	ARABIDOPSIS THALIANA GLYCINE-RICH PROTEIN 4, glycine-rich protein 14, ARABIDOPSIS THALIANA GLYCINE-RICH PROTEIN 14, GLYCINE-RICH PROTEIN 4	0	0	0	3	4	3	0	0	0	2	4	3	1.57	0	3	26.427	4.724	0.00281785	0.00542787	0.3417	0.3073
AT2G28340.1	protein_coding	GATA13	GATA transcription factor 13	0	0	0	7	1	4	0	0	0	5	1	4	1.64	0	3	26.334	4.719	0.00280863	0.00541235	0.3264	0.2969
AT1G22210.1	protein_coding	TPPC	trehalose-6-phosphate phosphatase C	0	0	0	0	1	9	0	0	0	0	1	9	1.65	0	3	26.317	4.718	0.00582	0.010698	0.3289	0.307
AT1G26380.1	protein_coding	FOX1, FOX, AtBBE3	FAD-LINKED OXIDOREDUCTASE, FAD-LINKED OXIDOREDUCTASE 1	6	8	2	191	185	149	8	9	2	132	205	146	83.52	6	161	26.28	4.716	2.44331e-39	2.57796e-38	0.0362	0.0311
AT1G65730.1	protein_coding	YSL7	YELLOW STRIPE like 7	27	42	34	1493	874	1109	34	45	37	1035	966	1085	533.78	39	1029	26.263	4.715	4.66217e-143	4.77676e-141	0.0126	0.015
AT4G31830.1	protein_coding	-	-	0	0	0	0	4	5	0	0	0	0	4	5	1.55	0	3	26.225	4.713	0.0041679	0.00783576	0.3387	0.3128
AT1G24010.1	protein_coding	-	-	0	0	0	3	3	4	0	0	0	2	3	4	1.55	0	3	26.096	4.706	0.00290325	0.0055816	0.3417	0.3073
AT3G02590.1	protein_coding	-	-	0	1	0	18	13	11	0	1	0	12	14	11	6.45	0	12	25.91	4.695	1.18949e-06	3.23114e-06	0.1663	0.1989
AT3G04190.1	protein_coding	-	-	0	0	0	6	3	2	0	0	0	4	3	2	1.57	0	3	25.686	4.683	0.00292381	0.00561804	0.3344	0.302
AT3G30210.1	protein_coding	MYB121, ATMYB121	myb domain protein 121	0	0	0	6	3	2	0	0	0	4	3	2	1.57	0	3	25.686	4.683	0.00292806	0.00562505	0.3348	0.302
AT3G10455.1	protein_coding	-	-	0	0	0	1	5	3	0	0	0	1	6	3	1.53	0	3	25.674	4.682	0.00414533	0.00779594	0.3579	0.3129
AT1G72100.1	protein_coding	-	-	0	0	0	5	1	5	0	0	0	3	1	5	1.58	0	3	25.651	4.681	0.00327607	0.00625119	0.3347	0.302
AT1G79320.1	protein_coding	MC6, AtMC6, MCP2c, AtMCP2c	metacaspase 6, metacaspase 2c	16	9	4	338	252	360	20	10	4	234	279	352	149.92	11	288	25.649	4.681	2.09752e-40	2.28465e-39	0.0454	0.0213
at4g03039	miRNA	MIR826A	MIR826a; miRNA	0	1	0	10	15	13	0	1	0	7	17	13	6.22	0	12	25.588	4.677	2.31713e-06	6.14687e-06	0.1738	0.2065
AT1G62710.1	protein_coding	BETAVPE, BETA-VPE	beta vacuolar processing enzyme	126	171	147	6950	3698	4145	161	184	161	4816	4089	4055	2244.23	169	4320	25.549	4.675	1.35401e-183	3.13001e-181	0.0124	0.0125
AT2G36780.1	protein_coding	-	-	16	24	21	632	682	603	20	26	23	438	754	590	308.52	23	594	25.548	4.675	1.20626e-106	5.81728e-105	0.0149	0.0167
AT1G73805.1	protein_coding	SARD1	SAR Deficient 1	51	56	26	1403	1376	1406	65	60	28	972	1522	1375	670.47	51	1290	25.483	4.671	2.37244e-82	6.72334e-81	0.0262	0.0143
AT2G18370.1	protein_coding	-	-	97	100	59	2775	2183	3281	124	107	64	1923	2414	3210	1307.03	98	2516	25.461	4.67	1.71874e-72	3.96331e-71	0.0325	0.0129
AT3G45730.1	protein_coding	-	-	41	63	56	1276	1665	2083	52	68	61	884	1841	2038	824.04	60	1588	25.383	4.666	1.66834e-128	1.24773e-126	0.0157	0.0138
AT1G60095.1	protein_coding	-	-	8	8	5	273	184	231	10	9	5	189	203	226	107.15	8	206	25.361	4.665	3.3649e-48	4.47125e-47	0.0297	0.0258
AT3G15605.2	protein_coding	-	-	0	0	0	4	4	2	0	0	0	3	4	2	1.53	0	3	25.359	4.664	0.00330738	0.0063074	0.3443	0.3074
AT4G22870.2	protein_coding	-	-	3	4	1	139	62	79	4	4	1	96	69	77	41.9	3	81	25.357	4.664	2.70649e-24	1.80004e-23	0.0521	0.0551
AT1G61200.1	protein_coding	-	-	0	0	0	2	1	7	0	0	0	1	1	7	1.56	0	3	25.304	4.661	0.00461699	0.00861405	0.3489	0.3072
AT5G04355.1	lncRNA			3	3	3	93	87	111	4	3	3	64	96	109	46.59	3	90	25.307	4.661	9.65018e-27	6.9443e-26	0.0465	0.0516
AT3G30530.1	protein_coding	ATBZIP42, bZIP42	basic leucine-zipper 42	1	2	1	54	47	34	1	2	1	37	52	33	21.2	1	41	25.167	4.653	3.01824e-15	1.38127e-14	0.0735	0.0991
AT3G43870.1	protein_coding	-	-	0	0	0	4	3	3	0	0	0	3	3	3	1.5	0	3	25.145	4.652	0.00322417	0.0061567	0.3447	0.3074
AT5G40645.1	protein_coding	-	-	0	0	0	4	3	3	0	0	0	3	3	3	1.5	0	3	25.145	4.652	0.00322029	0.00615013	0.3443	0.3074
AT3G57465.1	protein_coding	-	-	0	3	2	58	49	53	0	3	2	40	54	52	25.27	2	49	25.073	4.648	7.64835e-17	3.78641e-16	0.0714	0.0866
AT3G03165.1	lncRNA			0	2	1	31	35	31	0	2	1	21	39	30	15.63	1	30	25.044	4.646	6.00093e-12	2.31712e-11	0.0948	0.1246
AT4G32630.3	protein_coding	-	-	1	0	0	24	9	11	1	0	0	17	10	11	6.44	0	13	24.926	4.64	1.47848e-06	3.9902e-06	0.1625	0.1956
AT2G45550.1	protein_coding	CYP76C4	"cytochrome P450, family 76, subfamily C, polypeptide 4"	1	0	0	21	10	12	1	0	0	15	11	12	6.44	0	13	24.901	4.638	1.46002e-06	3.9423e-06	0.1653	0.1973
AT2G46270.2	protein_coding	GBF3	G-box binding factor 3	73	63	67	2953	1628	1980	93	68	73	2046	1800	1937	1002.92	78	1928	24.843	4.635	2.21293e-171	4.15422e-169	0.0117	0.0134
AT2G30310.1	protein_coding	-	-	0	0	0	10	0	3	0	0	0	7	0	3	1.64	0	3	24.804	4.633	0.00451702	0.0084388	0.3221	0.2922
AT3G57380.1	protein_coding	-	-	25	42	28	1056	859	1016	32	45	31	732	950	994	463.86	36	892	24.814	4.633	6.02209e-130	4.70513e-128	0.0133	0.0154
AT1G21120.2	protein_coding	IGMT2	indole glucosinolate O-methyltransferase 2	49	41	24	1218	1105	1198	62	44	26	844	1222	1172	561.77	44	1079	24.738	4.629	7.65969e-76	1.88103e-74	0.0277	0.0148
AT4G37700.1	protein_coding	-	-	5	4	4	148	115	151	6	4	4	103	127	148	65.41	5	126	24.719	4.628	7.59233e-34	6.90842e-33	0.0387	0.0379
AT3G14280.1	protein_coding	-	-	63	53	46	1844	1379	1872	80	57	50	1278	1525	1831	803.59	62	1545	24.706	4.627	9.01972e-107	4.38005e-105	0.0197	0.0139
AT3G05205.1	lncRNA			0	0	0	2	5	2	0	0	0	1	6	2	1.48	0	3	24.694	4.626	0.00446087	0.00834225	0.3595	0.313
AT4G27890.1	protein_coding	-	-	0	0	0	3	1	6	0	0	0	2	1	6	1.51	0	3	24.684	4.625	0.00439814	0.00823373	0.3482	0.3074
AT1G69470.1	protein_coding	-	-	0	0	0	2	4	3	0	0	0	1	4	3	1.46	0	3	24.625	4.622	0.00411075	0.00773247	0.3579	0.3131
AT3G63360.1	protein_coding	-	-	0	1	0	19	9	14	0	1	0	13	10	14	6.31	0	12	24.616	4.622	1.93282e-06	5.16606e-06	0.1702	0.1991
AT1G15770.1	protein_coding	-	-	0	0	0	2	6	1	0	0	0	1	7	1	1.5	0	3	24.492	4.614	0.00548639	0.0101274	0.3637	0.313
AT3G50980.1	protein_coding	XERO1	dehydrin xero 1	1	0	0	29	8	8	1	0	0	20	9	8	6.34	0	12	24.415	4.61	2.27064e-06	6.02924e-06	0.1598	0.1943
AT1G57630.1	protein_coding	-	-	12	2	4	104	256	202	15	2	4	72	283	198	95.76	7	184	24.385	4.608	3.05948e-14	1.33443e-13	0.1444	0.0285
AT1G68960.2	protein_coding	-	-	0	0	0	7	3	1	0	0	0	5	3	1	1.52	0	3	24.378	4.608	0.00399269	0.00752405	0.3389	0.3022
AT2G21740.1	protein_coding	EC1.2	EGG CELL 1.2	0	0	0	1	2	6	0	0	0	1	2	6	1.46	0	3	24.332	4.605	0.00530441	0.00980898	0.3652	0.313
AT3G05858.1	protein_coding	-	-	3	1	0	57	26	55	4	1	0	40	29	54	21.16	2	41	24.312	4.604	1.20242e-13	5.07129e-13	0.0903	0.098
AT4G10230.1	protein_coding	-	-	0	0	0	2	3	4	0	0	0	1	3	4	1.44	0	3	24.302	4.603	0.00423416	0.00794963	0.3582	0.3131
AT1G59640.2	protein_coding	BPEp, BPE, ZCW32, BPEub	BIG PETAL UB, BIG PETAL P, BIG PETAL	21	30	46	1199	863	881	27	32	50	831	954	862	459.38	36	882	24.235	4.599	6.32479e-116	3.67034e-114	0.0154	0.0154
AT4G19370.1	protein_coding	MWL-2	MODIFYING WALL LIGNIN-2	12	12	19	422	446	415	15	13	21	292	493	406	206.76	16	397	24.065	4.589	3.33616e-71	7.53762e-70	0.022	0.0187
AT3G05300.1	protein_coding	-	-	0	0	0	5	3	2	0	0	0	3	3	2	1.46	0	3	24.047	4.588	0.00390282	0.00736711	0.3487	0.3076
AT5G61710.1	protein_coding	-	-	0	0	0	5	3	2	0	0	0	3	3	2	1.46	0	3	24.047	4.588	0.00389736	0.0073573	0.3482	0.3076
AT1G73040.1	protein_coding	-	-	27	20	21	833	552	710	34	21	23	577	610	695	326.84	26	627	24.019	4.586	5.6041e-99	2.34308e-97	0.0168	0.0165
AT3G23120.1	protein_coding	AtRLP38, RLP38	receptor like protein 38	5	10	18	338	320	305	6	11	20	234	354	298	153.87	12	295	24.01	4.586	3.47943e-56	5.65176e-55	0.0276	0.0211
AT1G64795.1	protein_coding	-	-	0	0	1	20	9	12	0	0	1	14	10	12	6.11	0	12	23.946	4.582	2.6133e-06	6.8972e-06	0.1705	0.2013
AT1G26410.1	protein_coding	AtBBE6		0	0	0	9	1	2	0	0	0	6	1	2	1.55	0	3	23.941	4.581	0.00450971	0.00842682	0.3375	0.2971
AT3G61930.1	protein_coding	-	-	2	7	8	154	194	144	3	8	9	107	215	141	80.15	7	154	23.938	4.581	2.09707e-37	2.10543e-36	0.0362	0.0323
AT4G01060.3	protein_coding	ETC3, CPL3	CAPRICE-like MYB3, ENHANCER OF TRY AND CPC 3	53	57	56	2162	1339	1603	68	61	61	1498	1481	1568	789.51	63	1516	23.928	4.581	3.11079e-161	4.78087e-159	0.0117	0.0139
AT4G21903.1	protein_coding	-	-	33	8	15	705	465	478	42	9	16	489	514	468	256.23	22	490	23.934	4.581	1.26615e-47	1.65803e-46	0.0414	0.0175
AT1G49700.3	protein_coding	-	-	1	2	2	67	42	52	1	2	2	46	46	51	24.89	2	48	23.861	4.577	4.75004e-17	2.38064e-16	0.0662	0.0867
AT1G80120.1	protein_coding	-	-	11	11	12	419	267	356	14	12	13	290	295	348	162.14	13	311	23.831	4.575	6.97416e-67	1.44286e-65	0.0215	0.0205
AT3G47090.1	protein_coding	-	-	43	41	39	1481	1124	1118	55	44	43	1026	1243	1094	584.06	47	1121	23.803	4.573	1.88273e-137	1.74956e-135	0.0131	0.0147
AT5G37970.1	protein_coding	-	-	0	1	1	39	22	13	0	1	1	27	24	13	11.04	1	21	23.776	4.571	4.11094e-09	1.33597e-08	0.1181	0.1497
AT2G37910.1	protein_coding	-	-	0	0	0	5	2	3	0	0	0	3	2	3	1.44	0	3	23.699	4.567	0.00405203	0.0076297	0.3489	0.3076
AT3G03726.1	protein_coding	-	-	0	0	0	7	1	3	0	0	0	5	1	3	1.48	0	3	23.639	4.563	0.00436512	0.00817739	0.34	0.3023
AT1G61270.1	protein_coding	-	-	0	0	1	21	8	12	0	0	1	15	9	12	6.04	0	12	23.581	4.56	3.1351e-06	8.22163e-06	0.1705	0.2015
AT1G64110.2	protein_coding	DAA1	DUO1-activated ATPase 1	17	22	14	939	312	494	22	24	15	651	345	483	256.6	20	493	23.587	4.56	1.8029e-77	4.58028e-76	0.0211	0.0174
AT3G03345.1	lncRNA			0	0	0	3	5	1	0	0	0	2	6	1	1.43	0	3	23.534	4.557	0.00544061	0.0100458	0.3615	0.3132
AT3G29140.1	protein_coding	-	-	0	0	0	3	5	1	0	0	0	2	6	1	1.43	0	3	23.534	4.557	0.00543284	0.0100325	0.361	0.3132
AT5G46540.1	protein_coding	PGP7, ABCB7	P-glycoprotein 7, ATP-binding cassette B7	1	0	0	8	12	19	1	0	0	6	13	19	6.45	0	13	23.544	4.557	5.41974e-06	1.39411e-05	0.1871	0.2041
AT2G24285.2	protein_coding	-	-	0	0	0	3	3	3	0	0	0	2	3	3	1.39	0	3	23.422	4.55	0.00447324	0.00836314	0.357	0.3133
AT3G60160.1	protein_coding	MRP9, ABCC9, ATMRP9	ATP-binding cassette C9, multidrug resistance-associated protein 9	237	301	256	12445	5406	7005	302	323	280	8625	5978	6853	3726.7	302	7152	23.427	4.55	9.22598e-153	1.11714e-150	0.0151	0.0131
AT5G24820.1	protein_coding	-	-	0	0	0	3	3	3	0	0	0	2	3	3	1.39	0	3	23.422	4.55	0.00447175	0.00836092	0.3569	0.3133
AT1G68765.1	protein_coding	IDA	INFLORESCENCE DEFICIENT IN ABSCISSION	1	1	2	34	40	47	1	1	2	24	44	46	19.72	1	38	23.38	4.547	6.34605e-14	2.72122e-13	0.0789	0.1063
AT1G04370.1	protein_coding	ATERF14, ERF97, ERF14	Ethylene-responsive element binding factor 14	0	0	0	0	7	1	0	0	0	0	8	1	1.45	0	3	23.356	4.546	0.0088872	0.0159094	0.3527	0.319
AT4G18360.2	protein_coding	GOX3	glycolate oxidase 3	72	84	84	2463	2131	2434	92	90	92	1707	2356	2381	1119.69	91	2148	23.36	4.546	3.71091e-159	5.40613e-157	0.0126	0.0131
AT1G55740.1	protein_coding	AtSIP1, RS1, SIP1	seed imbibition 1, raffinose synthase 1	92	135	130	5017	2466	3319	117	145	142	3477	2727	3247	1642.47	135	3150	23.202	4.536	1.83283e-151	2.15403e-149	0.0142	0.0126
AT3G14225.2	protein_coding	GLIP4	GDSL-motif lipase 4	0	0	1	13	5	19	0	0	1	9	6	19	5.7	0	11	23.194	4.536	7.7489e-06	1.96577e-05	0.1761	0.2094
AT5G42580.1	protein_coding	CYP705A12	"cytochrome P450, family 705, subfamily A, polypeptide 12"	14	4	8	284	168	325	18	4	9	197	186	318	121.9	10	234	23.122	4.531	4.2959e-40	4.63404e-39	0.04	0.0238
AT5G63560.1	protein_coding	FACT	FATTY ALCOHOL:CAFFEOYL-CoA CAFFEOYL TRANSFERASE	118	90	62	2899	2108	2790	150	97	68	2009	2331	2729	1230.69	105	2356	23.108	4.53	4.33335e-74	1.0342e-72	0.0302	0.013
AT1G04983.1	lncRNA			0	0	0	5	1	4	0	0	0	3	1	4	1.41	0	3	23.063	4.528	0.00491444	0.00913151	0.353	0.3077
AT4G16730.1	protein_coding	TPS02	terpene synthase 02	0	0	0	5	1	4	0	0	0	3	1	4	1.41	0	3	23.063	4.528	0.00491463	0.00913151	0.3531	0.3077
AT1G51780.1	protein_coding	ILL5	IAA-leucine resistant (ILR)-like gene 5	0	0	0	3	2	4	0	0	0	2	2	4	1.37	0	3	22.953	4.521	0.00493016	0.0091556	0.3585	0.3133
at2g25171	miRNA	MIR862A	MIR862a; miRNA	0	0	0	3	2	4	0	0	0	2	2	4	1.37	0	3	22.952	4.521	0.00493867	0.00917018	0.3592	0.3133
AT1G19020.1	protein_coding	-	-	53	33	32	858	1168	1391	68	35	35	595	1292	1361	564.14	46	1083	22.907	4.518	6.23329e-40	6.70066e-39	0.0545	0.0148
AT2G44330.1	protein_coding	-	-	0	0	0	4	0	6	0	0	0	3	0	6	1.44	0	3	22.891	4.517	0.00659403	0.0120228	0.3482	0.3076
AT5G22545.1	protein_coding	-	-	1	4	0	31	49	59	1	4	0	21	54	58	23.16	2	44	22.888	4.516	6.8085e-14	2.91105e-13	0.0882	0.095
AT5G53640.1	protein_coding	-	-	0	0	0	8	3	0	0	0	0	6	3	0	1.48	0	3	22.877	4.516	0.00606399	0.0111151	0.3372	0.3023
AT1G07620.2	protein_coding	ATOBGM, TRM32	TON1 Recruiting Motif 32	24	35	40	1114	901	821	31	38	44	772	996	803	447.23	38	857	22.829	4.513	2.52881e-125	1.80903e-123	0.0132	0.0155
AT3G63380.1	protein_coding	ACA12	auto-inhibited Ca2+ ATPase 12	49	105	51	1703	2060	1813	62	113	56	1180	2278	1774	910.44	77	1744	22.813	4.512	5.59752e-135	4.81748e-133	0.0145	0.0136
AT1G73050.1	protein_coding	-	-	0	0	0	8	2	1	0	0	0	6	2	1	1.46	0	3	22.79	4.51	0.00538842	0.00995769	0.3468	0.3024
AT1G77520.1	protein_coding	-	-	35	13	28	875	510	814	45	14	31	606	564	796	342.63	30	655	22.783	4.51	7.5445e-79	1.95577e-77	0.0227	0.0163
AT1G08637.1	lncRNA			0	0	0	1	4	3	0	0	0	1	4	3	1.34	0	3	22.756	4.508	0.00618291	0.0113175	0.3708	0.3193
AT1G69790.1	protein_coding	-	-	13	12	13	429	326	346	17	13	14	297	360	338	173.32	15	332	22.744	4.507	4.87645e-68	1.04042e-66	0.0212	0.02
AT4G05590.1	protein_coding	NRGA1	Negative Regulator of Guard Cell ABA Signaling 1	72	55	59	1703	1576	2066	92	59	64	1180	1743	2021	859.88	72	1648	22.691	4.504	7.36164e-84	2.17207e-82	0.0251	0.0137
AT5G41390.1	protein_coding	-	-	0	1	0	22	7	12	0	1	0	15	8	12	5.97	0	12	22.641	4.501	4.86155e-06	1.25549e-05	0.1752	0.2016
AT4G34550.1	protein_coding	-	-	0	0	1	26	11	6	0	0	1	18	12	6	6.19	0	12	22.567	4.496	5.34706e-06	1.37617e-05	0.1745	0.1978
AT1G53970.2	protein_coding	-	-	0	0	0	1	6	1	0	0	0	1	7	1	1.38	0	3	22.526	4.493	0.00834079	0.0149926	0.379	0.3192
AT4G36950.1	protein_coding	MAPKKK21	mitogen-activated protein kinase kinase kinase 21	6	2	1	109	63	97	8	2	1	76	70	95	41.83	4	80	22.512	4.493	6.03458e-21	3.54236e-20	0.0646	0.056
AT4G09765.1	lncRNA			0	0	0	1	3	4	0	0	0	1	3	4	1.32	0	3	22.44	4.488	0.00637076	0.011643	0.3714	0.3193
AT3G09380.1	protein_coding	-	-	0	0	0	4	4	1	0	0	0	3	4	1	1.36	0	3	22.423	4.487	0.0058403	0.0107311	0.3608	0.3134
AT3G19530.1	protein_coding	-	-	0	0	0	8	1	2	0	0	0	6	1	2	1.43	0	3	22.407	4.486	0.00565832	0.0104268	0.3471	0.3024
AT1G63057.1	protein_coding	-	-	0	0	0	0	2	6	0	0	0	0	2	6	1.35	0	3	22.394	4.485	0.00805526	0.0145167	0.3582	0.3192
AT1G55525.1	ncRNA		other RNA	0	0	0	4	3	2	0	0	0	3	3	2	1.34	0	3	22.38	4.484	0.00522396	0.0096659	0.3588	0.3134
AT3G13280.1	protein_coding	-	-	1	0	0	17	10	11	1	0	0	12	11	11	5.81	0	11	22.382	4.484	5.49812e-06	1.41375e-05	0.1792	0.2074
AT3G10750.1	protein_coding	-	-	1	2	0	21	30	37	1	2	0	15	33	36	14.56	1	28	22.327	4.481	1.95642e-10	6.92083e-10	0.1077	0.132
AT3G60970.1	protein_coding	ABCC15, MRP15, ATMRP15	ATP-binding cassette C15, multidrug resistance-associated protein 15	24	36	24	1249	572	679	31	39	26	866	632	664	376.3	32	721	22.3	4.479	1.55944e-106	7.46901e-105	0.0154	0.016
AT1G01453.1	protein_coding	-	-	7	4	2	139	89	154	9	4	2	96	98	151	60.13	5	115	22.228	4.474	9.20777e-27	6.63448e-26	0.052	0.0407
AT5G39090.1	protein_coding	-	-	12	12	2	270	205	252	15	13	2	187	227	247	115.11	10	220	22.222	4.474	1.50121e-35	1.43116e-34	0.0464	0.0247
AT4G10850.1	protein_coding	AtSWEET7, SWEET7		0	1	0	10	9	16	0	1	0	7	10	16	5.6	0	11	22.177	4.471	9.86796e-06	2.48083e-05	0.1879	0.2136
AT3G56400.1	protein_coding	ATWRKY70, WRKY70	WRKY DNA-binding protein 70, ARABIDOPSIS THALIANA WRKY DNA-BINDING PROTEIN 70	72	67	63	1623	2107	1927	92	72	69	1125	2330	1885	928.71	78	1780	22.163	4.47	6.44169e-79	1.67143e-77	0.0267	0.0135
AT5G40420.1	protein_coding	OLEO2, OLE2	OLEOSIN 2, oleosin 2	2	0	1	67	18	19	3	0	1	46	20	19	14.76	1	28	22.055	4.463	5.81118e-11	2.12116e-10	0.093	0.122
AT1G04483.1	lncRNA			0	0	0	4	2	3	0	0	0	3	2	3	1.32	0	3	22.04	4.462	0.00543168	0.010031	0.3598	0.3135
AT1G05005.1	protein_coding	-	-	0	0	0	6	1	3	0	0	0	4	1	3	1.37	0	3	22.046	4.462	0.00573834	0.0105648	0.3566	0.3078
AT4G07250.1	lncRNA			0	0	0	4	2	3	0	0	0	3	2	3	1.32	0	3	22.04	4.462	0.00542312	0.0100159	0.3592	0.3135
AT4G01420.2	protein_coding	CBL5	calcineurin B-like protein 5	0	0	1	7	15	11	0	0	1	5	17	11	5.55	0	11	21.981	4.458	1.46831e-05	3.62843e-05	0.1937	0.2179
AT1G77450.1	protein_coding	anac032, NAC032	NAC domain containing protein 32	116	148	133	4474	3221	3354	148	159	145	3101	3562	3281	1732.57	151	3315	21.968	4.457	1.53827e-179	3.33543e-177	0.0115	0.0126
AT3G57100.1	protein_coding	-	-	2	0	1	35	27	30	3	0	1	24	30	29	14.52	1	28	21.913	4.454	1.25967e-10	4.50046e-10	0.1073	0.1295
AT3G17010.1	protein_coding	REM22	REPRODUCTIVE MERISTEM 22	0	0	0	1	2	5	0	0	0	1	2	5	1.3	0	3	21.83	4.448	0.00746331	0.0135109	0.3794	0.3193
AT1G06867.1	lncRNA			0	0	0	2	4	2	0	0	0	1	4	2	1.29	0	2	21.816	4.447	0.00667546	0.0121633	0.375	0.3194
AT3G25160.1	protein_coding	-	-	0	0	0	2	5	1	0	0	0	1	6	1	1.32	0	3	21.683	4.438	0.00789489	0.0142506	0.3785	0.3194
AT2G41360.1	protein_coding	-	-	0	0	0	2	3	3	0	0	0	1	3	3	1.27	0	2	21.644	4.436	0.00646478	0.0118033	0.374	0.3194
AT5G07815.1	lncRNA			0	0	0	2	3	3	0	0	0	1	3	3	1.27	0	2	21.644	4.436	0.00645724	0.0117911	0.3735	0.3194
AT4G25635.1	tRNA		pre-tRNA	0	0	0	2	0	7	0	0	0	1	0	7	1.37	0	3	21.617	4.434	0.00978043	0.0173948	0.3638	0.3133
AT5G49600.1	protein_coding	-	-	0	0	1	9	13	11	0	0	1	6	14	11	5.41	0	10	21.572	4.431	1.40076e-05	3.46978e-05	0.1927	0.2182
AT1G54570.1	protein_coding	PES1	phytyl ester synthase 1	451	602	509	17925	10903	14115	575	647	556	12422	12056	13808	6677.37	593	12762	21.531	4.428	1.10527e-153	1.36794e-151	0.0148	0.0147
AT5G43150.1	protein_coding	-	-	181	165	225	6118	4457	4947	231	177	246	4240	4928	4839	2443.58	218	4669	21.527	4.428	1.1093e-151	1.31476e-149	0.0142	0.0126
AT1G61930.1	protein_coding	-	-	25	22	15	793	440	501	32	24	16	550	487	490	266.35	24	509	21.437	4.422	4.5848e-86	1.42017e-84	0.0178	0.0173
AT3G14710.1	protein_coding	-	-	4	5	7	198	127	124	5	5	8	137	140	121	69.51	6	133	21.439	4.422	2.50612e-34	2.31731e-33	0.0368	0.0357
AT5G59530.1	protein_coding	-	-	19	38	16	679	598	622	24	41	17	471	661	608	303.8	27	580	21.318	4.414	1.26897e-85	3.88765e-84	0.0188	0.0168
AT4G12290.1	protein_coding	-	-	650	1072	748	31198	17163	18779	828	1152	817	21621	18978	18371	10294.5	932	19657	21.278	4.411	8.21218e-120	5.18517e-118	0.0192	0.0164
AT1G52690.1	protein_coding	LEA7	LATE EMBRYOGENESIS ABUNDANT 7	2	1	1	117	17	16	3	1	1	81	19	16	20.04	2	39	21.256	4.41	1.17886e-12	4.72404e-12	0.0725	0.0955
AT2G37770.2	protein_coding	AKR4C9, ChlAKR	Aldo-keto reductase family 4 member C9, Chloroplastic aldo-keto reductase	183	286	183	6855	4842	5599	233	307	200	4751	5354	5477	2720.41	247	5194	21.254	4.41	9.55407e-146	1.03983e-143	0.0148	0.0126
AT5G22610.2	protein_coding	-	-	0	0	0	7	2	1	0	0	0	5	2	1	1.34	0	3	21.235	4.408	0.00694955	0.0126274	0.3634	0.3079
AT3G09545.1	lncRNA			0	0	1	13	10	11	0	0	1	9	11	11	5.32	0	10	21.21	4.407	1.2846e-05	3.19307e-05	0.1903	0.2163
AT1G62570.1	protein_coding	FMO GS-OX4	flavin-monooxygenase glucosinolate S-oxygenase 4	282	321	213	9430	5752	6850	359	345	233	6535	6360	6701	3422.26	312	6532	21.204	4.406	7.55032e-136	6.81259e-134	0.0162	0.0129
AT3G27884.2	ncRNA		other RNA	2	0	1	27	25	36	3	0	1	19	28	35	14.2	1	27	21.201	4.406	4.12704e-10	1.43134e-09	0.1124	0.1326
AT4G28340.1	protein_coding	-	-	0	1	0	5	11	15	0	1	0	3	12	15	5.23	0	10	21.176	4.404	2.59309e-05	6.26134e-05	0.1974	0.2229
AT2G22465.1	protein_coding	-	-	0	0	0	5	3	1	0	0	0	3	3	1	1.29	0	2	21.147	4.402	0.0068508	0.0124593	0.3644	0.3136
AT3G04410.1	protein_coding	-	-	0	0	0	5	3	1	0	0	0	3	3	1	1.29	0	2	21.147	4.402	0.00684738	0.0124539	0.3642	0.3136
AT1G65690.1	protein_coding	NHL6	NDR1/HIN1-like 6	57	64	46	1520	1353	1528	73	69	50	1053	1496	1495	705.99	64	1348	20.994	4.392	7.02166e-111	3.62367e-109	0.0169	0.0142
AT5G22980.1	protein_coding	scpl47	serine carboxypeptidase-like 47	0	0	0	5	2	2	0	0	0	3	2	2	1.27	0	2	20.96	4.39	0.00657054	0.0119862	0.3647	0.3136
AT3G14700.2	protein_coding	-	-	4	9	12	260	186	210	5	10	13	180	206	205	103.19	9	197	20.909	4.386	1.39798e-44	1.69643e-43	0.03	0.0265
AT1G26240.1	protein_coding	-	-	0	0	0	0	5	2	0	0	0	0	6	2	1.25	0	3	20.828	4.38	0.0104345	0.0184771	0.3721	0.3258
AT2G38340.1	protein_coding	DREB19	dehydration response element-binding protein 19	0	0	5	33	34	49	0	0	5	23	38	48	18.98	2	36	20.766	4.376	3.81981e-11	1.40788e-10	0.1173	0.109
AT5G44990.4	protein_coding	-	-	2	2	0	24	47	36	3	2	0	17	52	35	18.09	2	35	20.766	4.376	1.67887e-11	6.31262e-11	0.0982	0.115
AT1G07547.1	lncRNA			0	1	0	8	9	15	0	1	0	6	10	15	5.21	0	10	20.751	4.375	2.22641e-05	5.41567e-05	0.1965	0.2208
AT3G56710.1	protein_coding	SIB1	sigma factor binding protein 1	50	52	44	1209	1244	1350	64	56	48	838	1376	1321	616.96	56	1178	20.754	4.375	8.53549e-102	3.79565e-100	0.018	0.0146
AT1G53625.1	protein_coding	-	-	0	0	2	21	18	18	0	0	2	15	20	18	9.04	1	18	20.739	4.374	1.93525e-07	5.58396e-07	0.156	0.1709
AT3G01030.1	protein_coding	-	-	0	0	0	3	3	2	0	0	0	2	3	2	1.23	0	2	20.672	4.37	0.00723237	0.0131148	0.3736	0.3196
AT4G11470.2	protein_coding	CRK31	cysteine-rich RLK (RECEPTOR-like protein kinase) 31	0	0	2	22	8	27	0	0	2	15	9	26	8.78	1	17	20.673	4.37	2.36769e-07	6.78831e-07	0.1441	0.1713
AT5G28960.1	protein_coding	-	-	0	0	0	3	3	2	0	0	0	2	3	2	1.23	0	2	20.672	4.37	0.00724975	0.0131447	0.3746	0.3196
AT5G52670.1	protein_coding	-	-	0	0	0	3	4	1	0	0	0	2	4	1	1.25	0	2	20.678	4.37	0.00812843	0.0146354	0.3767	0.3195
AT2G20170.1	protein_coding	-	-	0	0	2	17	19	19	0	0	2	12	21	19	8.93	1	17	20.666	4.369	2.63721e-07	7.53092e-07	0.1588	0.1736
AT1G13470.1	protein_coding	-	-	9	4	4	123	168	160	11	4	4	85	186	157	74.61	6	143	20.652	4.368	8.94176e-26	6.24027e-25	0.0583	0.0344
AT1G49475.1	protein_coding	-	-	10	11	6	237	208	257	13	12	7	164	230	251	112.8	11	215	20.559	4.362	9.93447e-44	1.17396e-42	0.0319	0.0251
AT3G22930.2	protein_coding	AtCML11, CML11	calmodulin-like 11	21	20	12	552	385	454	27	21	13	383	426	444	218.96	20	418	20.553	4.361	9.35477e-68	1.97929e-66	0.0227	0.0183
AT2G31310.1	protein_coding	LBD14	LOB domain-containing protein 14	0	0	0	6	0	4	0	0	0	4	0	4	1.35	0	3	20.516	4.359	0.0175935	0.0299774	0.7091	0.3078
AT3G12430.1	protein_coding	-	-	0	0	0	6	0	4	0	0	0	4	0	4	1.35	0	3	20.517	4.359	0.017589	0.0299714	0.7089	0.3078
AT2G01422.2	ncRNA			0	1	0	8	7	18	0	1	0	6	8	18	5.33	0	11	20.509	4.358	2.73267e-05	6.58529e-05	0.199	0.2183
AT3G03870.1	protein_coding	-	-	245	205	279	6805	5710	6222	312	220	305	4716	6314	6087	2992.32	279	5706	20.472	4.356	9.30445e-117	5.54914e-115	0.0185	0.0127
AT2G22940.1	protein_coding	-	-	0	0	0	2	1	5	0	0	0	1	1	5	1.23	0	2	20.367	4.348	0.00905833	0.0161971	0.3805	0.3195
AT1G52857.2	protein_coding	-	-	0	0	0	3	2	3	0	0	0	2	2	3	1.2	0	2	20.341	4.346	0.00751961	0.0136066	0.375	0.3196
AT2G41730.1	protein_coding	-	-	29	33	42	624	926	1055	37	35	46	432	1024	1032	434.46	39	829	20.205	4.337	3.71801e-89	1.24249e-87	0.0188	0.0156
AT4G26120.2	protein_coding	-	-	23	10	23	456	519	447	29	11	25	316	574	437	232.06	22	442	20.155	4.333	5.31099e-44	6.33221e-43	0.0405	0.018
AT2G07575.1	ncRNA			0	0	0	0	4	3	0	0	0	0	4	3	1.23	0	2	20.097	4.329	0.0210281	0.0353323	0.7613	0.3258
AT2G42980.1	protein_coding	-	-	3	2	2	51	61	69	4	2	2	35	67	67	29.74	3	56	20.056	4.326	3.00415e-17	1.52034e-16	0.0658	0.077
AT1G24380.1	protein_coding	-	-	0	1	1	17	15	23	0	1	1	12	17	22	8.84	1	17	19.953	4.319	1.10216e-07	3.2359e-07	0.1319	0.1737
AT1G02390.1	protein_coding	ATGPAT2, GPAT2	GLYCEROL-3-PHOSPHATE sn-2-ACYLTRANSFERASE 2	15	13	19	537	329	349	19	14	21	372	364	341	188.53	18	359	19.927	4.317	4.55461e-69	9.87574e-68	0.0202	0.0193
AT1G08100.1	protein_coding	NRT2.2, ATNRT2.2, NRT2;2AT, ACH2	NITRATE TRANSPORTER 2.2, nitrate transporter 2.2	4	0	1	41	30	64	5	0	1	28	33	63	21.73	2	41	19.937	4.317	1.47632e-11	5.5705e-11	0.1127	0.098
AT1G09500.2	protein_coding	-	-	44	51	23	844	982	1084	56	55	25	585	1086	1060	477.87	45	910	19.914	4.316	3.29918e-56	5.3652e-55	0.0342	0.0153
AT4G11170.1	protein_coding	RMG1	Resistance Methylated Gene 1	13	3	1	127	149	110	17	3	1	88	165	108	63.54	7	120	19.866	4.312	6.58356e-15	2.97062e-14	0.1193	0.0394
AT1G55760.1	protein_coding	-	-	142	142	114	4205	2594	3317	181	153	125	2914	2868	3245	1580.91	153	3009	19.821	4.309	2.81904e-135	2.45643e-133	0.0148	0.0127
AT3G10790.1	protein_coding	-	-	0	0	0	6	3	0	0	0	0	4	3	0	1.25	0	2	19.824	4.309	0.00812486	0.0146308	0.2866	0.3137
AT5G27130.1	protein_coding	AGL39	AGAMOUS-like 39	0	0	0	6	3	0	0	0	0	4	3	0	1.25	0	2	19.824	4.309	0.00812174	0.0146261	0.2865	0.3137
AT4G09750.1	protein_coding	-	-	230	214	236	6497	4894	5677	293	230	258	4503	5412	5554	2708.1	260	5156	19.809	4.308	4.37643e-142	4.40335e-140	0.0147	0.0126
AT1G70110.1	protein_coding	LecRK-V.1	L-type lectin receptor kinase V.1	0	0	0	0	2	5	0	0	0	0	2	5	1.18	0	2	19.771	4.305	0.0130329	0.0227074	0.4268	0.3259
AT5G45230.1	protein_coding	-	-	0	0	0	0	2	5	0	0	0	0	2	5	1.18	0	2	19.771	4.305	0.0130289	0.0227018	0.4266	0.3259
AT3G44540.1	protein_coding	FAR4	fatty acid reductase 4	60	39	37	1307	884	1221	76	42	40	906	977	1194	539.42	53	1026	19.715	4.301	7.90859e-82	2.20111e-80	0.0224	0.015
AT4G10720.2	protein_coding	-	-	1	5	4	119	76	64	1	5	4	82	84	63	40.02	3	76	19.692	4.3	1.26049e-21	7.61991e-21	0.0547	0.0579
AT3G12720.1	protein_coding	MYB67, ATY53, ATMYB67	myb domain protein 67	2	1	2	39	33	58	3	1	2	27	36	57	21.01	2	40	19.68	4.299	9.69079e-14	4.10761e-13	0.0767	0.1007
AT4G31690.1	protein_coding	-	-	0	0	0	6	2	1	0	0	0	4	2	1	1.22	0	2	19.679	4.299	0.00883475	0.0158236	0.3714	0.3137
AT3G27416.1	protein_coding	-	-	0	0	0	3	1	4	0	0	0	2	1	4	1.18	0	2	19.672	4.298	0.00909802	0.0162628	0.3778	0.3197
AT4G01480.1	protein_coding	PPa5, AtPPa5	pyrophosphorylase 5	267	271	210	7182	5127	6261	340	291	229	4977	5669	6125	2938.7	287	5590	19.608	4.293	1.58447e-119	9.8927e-118	0.0177	0.0127
AT5G65040.1	protein_coding	IRM1	Increased Resistance to Myzus persicae 1	70	46	60	1537	1279	1528	89	49	66	1065	1414	1495	696.4	68	1325	19.581	4.291	8.05526e-86	2.4787e-84	0.0221	0.0142
AT4G10350.1	protein_coding	BRN2, NAC070, ANAC070	NAC domain containing protein 70, BEARSKIN 2	0	0	0	4	3	1	0	0	0	3	3	1	1.18	0	2	19.492	4.285	0.00918977	0.0164132	0.3782	0.3197
AT1G08173.1	lncRNA			2	5	2	57	81	75	3	5	2	40	90	73	35.42	3	68	19.48	4.284	1.04969e-19	5.87808e-19	0.057	0.0666
AT5G25250.1	protein_coding	FLOT1	flotillin 1	54	69	41	1140	1448	1378	69	74	45	790	1601	1348	654.49	63	1246	19.476	4.284	2.03651e-82	5.78895e-81	0.0226	0.0144
AT2G23321.1	protein_coding	-	-	0	1	0	21	6	9	0	1	0	15	7	9	5.18	0	10	19.46	4.282	2.51769e-05	6.08874e-05	0.1895	0.2126
AT2G26560.1	protein_coding	PLA IIA, PLP2, PLA2A, PLAII alpha	PHOSPHOLIPASE A 2A, PATATIN-LIKE PROTEIN 2, phospholipase A 2A	65	148	88	2147	2621	2205	83	159	96	1488	2898	2157	1146.86	113	2181	19.414	4.279	1.10377e-155	1.4427e-153	0.0118	0.0131
AT2G31100.1	protein_coding	-	-	0	0	0	4	2	2	0	0	0	3	2	2	1.16	0	2	19.329	4.273	0.0087977	0.0157633	0.3787	0.3198
AT4G39020.1	protein_coding	-	-	0	0	0	4	2	2	0	0	0	3	2	2	1.16	0	2	19.329	4.273	0.00879149	0.0157542	0.3784	0.3198
AT1G54095.1	protein_coding	-	-	0	0	4	37	23	34	0	0	4	26	25	33	14.78	1	28	19.276	4.269	1.66084e-09	5.5304e-09	0.1316	0.1271
AT4G12210.1	protein_coding	-	-	0	0	0	4	4	0	0	0	0	3	4	0	1.2	0	2	19.226	4.265	0.0125074	0.0218721	0.41	0.3197
AT2G06375.1	lncRNA			0	0	0	1	6	0	0	0	0	1	7	0	1.22	0	3	19.206	4.264	0.016353	0.028012	0.391	0.3259
AT5G06755.1	protein_coding	-	-	0	0	0	1	6	0	0	0	0	1	7	0	1.22	0	3	19.21	4.264	0.0163199	0.0279589	0.3903	0.3259
AT5G15660.1	protein_coding	-	-	0	0	0	1	6	0	0	0	0	1	7	0	1.22	0	3	19.213	4.264	0.0162895	0.0279102	0.3896	0.3259
AT1G13490.2	protein_coding	-	-	0	0	0	2	0	6	0	0	0	1	0	6	1.21	0	2	19.178	4.261	0.0135783	0.02359	0.3813	0.3196
AT5G27200.1	protein_coding	ACP5	acyl carrier protein 5	0	0	0	2	0	6	0	0	0	1	0	6	1.21	0	2	19.177	4.261	0.0135885	0.0236048	0.3816	0.3196
AT5G42600.1	protein_coding	MRN1	marneral synthase 1	11	16	10	441	140	421	14	17	11	306	155	412	152.4	14	291	19.167	4.261	1.72956e-40	1.88975e-39	0.038	0.0211
AT2G31865.3	protein_coding	atPARG2, PARG2	poly(ADP-ribose) glycohydrolase 2	53	42	52	1342	1098	1124	68	45	57	930	1214	1100	568.87	57	1081	19.151	4.259	1.05047e-106	5.0835e-105	0.0161	0.0148
AT1G01355.1	protein_coding	-	-	0	1	0	21	7	7	0	1	0	15	8	7	5.04	0	10	19.127	4.258	3.19871e-05	7.66151e-05	0.1918	0.2149
AT2G31990.2	protein_coding	-	-	16	19	24	523	439	447	20	20	26	362	485	437	225.36	22	428	19.067	4.253	3.27315e-75	7.94734e-74	0.0188	0.0181
AT1G26762.1	protein_coding	-	-	4	4	9	137	125	139	5	4	10	95	138	136	64.73	6	123	18.996	4.248	2.13879e-30	1.74415e-29	0.0402	0.0384
AT5G51760.2	protein_coding	AHG1	ABA-hypersensitive germination 1	0	1	0	18	8	7	0	1	0	12	9	7	4.87	0	9	18.976	4.246	3.50668e-05	8.36763e-05	0.194	0.2194
AT5G01200.1	protein_coding	-	-	40	47	31	1260	761	858	51	51	34	873	841	839	448.23	45	851	18.949	4.244	4.15983e-116	2.4393e-114	0.0134	0.0155
AT5G09265.1	lncRNA			1	0	0	10	7	15	1	0	0	7	8	15	5.1	0	10	18.944	4.244	3.98096e-05	9.44458e-05	0.2033	0.221
AT4G07385.1	lncRNA			0	1	0	10	10	9	0	1	0	7	11	9	4.64	0	9	18.921	4.242	4.46907e-05	0.000105409	0.2003	0.229
AT1G44318.1	protein_coding	hemb2		0	0	0	2	3	2	0	0	0	1	3	2	1.11	0	2	18.906	4.241	0.0104402	0.0184847	0.3947	0.3261
AT1G04827.1	lncRNA			0	0	0	2	4	1	0	0	0	1	4	1	1.13	0	2	18.86	4.237	0.0118369	0.020771	0.4006	0.3261
AT1G29290.1	protein_coding	-	-	12	12	11	178	341	311	15	13	12	123	377	304	140.81	13	268	18.848	4.236	1.04657e-40	1.15069e-39	0.0356	0.0222
AT1G02220.1	protein_coding	NAC003, ANAC003	NAC domain containing protein 3	53	82	63	1767	1372	1518	68	88	69	1225	1517	1485	741.86	75	1409	18.827	4.235	6.68072e-141	6.55671e-139	0.012	0.0141
AT3G19660.1	protein_coding	-	-	44	60	46	1126	1135	1241	56	64	50	780	1255	1214	570.03	57	1083	18.814	4.234	2.08482e-115	1.19742e-113	0.0143	0.0148
AT5G61640.2	protein_coding	PMSR1, ATMSRA1	ARABIDOPSIS THALIANA METHIONINE SULFOXIDE REDUCTASE A1, peptidemethionine sulfoxide reductase 1	116	124	145	3575	2536	3055	148	133	158	2478	2804	2989	1451.63	146	2757	18.808	4.233	1.61923e-158	2.29906e-156	0.0119	0.0127
AT1G68320.1	protein_coding	BW62B, BW62C, AtMYB62, MYB62	myb domain protein 62	6	4	5	103	129	123	8	4	5	71	143	120	58.63	6	111	18.699	4.225	2.19357e-26	1.56044e-25	0.0468	0.0423
AT5G07990.1	protein_coding	CYP75B1, TT7, D501	TRANSPARENT TESTA 7, CYTOCHROME P450 75B1	108	135	110	4897	1852	2323	138	145	120	3394	2048	2272	1352.82	134	2571	18.677	4.223	1.21671e-122	8.26036e-121	0.0157	0.0128
AT5G67140.1	protein_coding	-	-	59	31	56	1475	941	1053	75	33	61	1022	1041	1030	543.75	56	1031	18.675	4.223	1.74057e-93	6.38919e-92	0.0186	0.0149
AT1G30250.1	protein_coding	-	-	0	1	1	27	16	13	0	1	1	19	18	13	8.55	1	17	18.654	4.221	2.21379e-07	6.35945e-07	0.1354	0.1731
AT1G09443.1	lncRNA			0	0	0	2	2	3	0	0	0	1	2	3	1.09	0	2	18.586	4.216	0.0108025	0.0190648	0.3943	0.3262
AT1G29770.1	protein_coding	-	-	0	0	0	2	2	3	0	0	0	1	2	3	1.09	0	2	18.586	4.216	0.0108009	0.019063	0.3943	0.3262
AT5G01300.2	protein_coding	-	-	4	6	2	130	83	78	5	6	2	90	92	76	45.32	4	86	18.564	4.214	5.70977e-24	3.75518e-23	0.0477	0.052
AT2G18550.1	protein_coding	ATHB21, HB21, HB-2	homeobox protein 21, homeobox-2	6	0	1	70	37	58	8	0	1	49	41	57	25.82	3	49	18.526	4.211	2.11355e-12	8.35826e-12	0.1103	0.0843
AT2G23400.2	protein_coding	-	-	0	0	0	3	0	5	0	0	0	2	0	5	1.16	0	2	18.517	4.211	0.014492	0.0250575	0.4182	0.3197
AT1G77160.1	protein_coding	-	-	1	0	1	21	12	21	1	0	1	15	13	21	8.46	1	16	18.446	4.205	2.67612e-07	7.63502e-07	0.1356	0.1757
AT5G55010.1	protein_coding	-	-	1	0	0	5	9	17	1	0	0	3	10	17	5.22	0	10	18.386	4.201	7.87564e-05	0.000181787	0.2187	0.223
AT4G05380.1	protein_coding	-	-	0	10	1	91	53	72	0	11	1	63	59	70	33.99	4	64	18.376	4.2	8.51898e-12	3.26327e-11	0.1354	0.0669
AT5G64890.1	protein_coding	PROPEP2	elicitor peptide 2 precursor	1	2	0	21	29	21	1	2	0	15	32	21	11.76	1	23	18.328	4.196	8.69695e-09	2.76529e-08	0.1173	0.1502
AT3G11165.1	protein_coding	-	-	0	1	0	13	6	12	0	1	0	9	7	12	4.74	0	9	18.313	4.195	5.25408e-05	0.000123115	0.2045	0.224
AT1G14455.1	protein_coding	-	-	0	0	1	12	11	7	0	0	1	8	12	7	4.74	0	9	18.261	4.191	5.59186e-05	0.000130701	0.2068	0.2264
AT2G46430.2	protein_coding	CNGC3, ATCNGC3, CNGC3.C	cyclic nucleotide gated channel 3	113	129	107	3377	2175	2580	144	139	117	2340	2405	2524	1278.13	133	2423	18.225	4.188	1.70077e-150	1.98218e-148	0.0122	0.0129
AT1G68850.1	protein_coding	-	-	43	24	18	706	553	664	55	26	20	489	611	650	308.43	34	583	18.193	4.185	3.20142e-47	4.14378e-46	0.0376	0.0167
AT5G40780.2	protein_coding	LHT1	lysine histidine transporter 1	117	119	104	3280	2155	2467	149	128	114	2273	2383	2413	1243.33	130	2356	18.168	4.183	1.73461e-147	1.93302e-145	0.0124	0.013
AT5G42223.1	protein_coding	-	-	0	0	0	0	4	2	0	0	0	0	4	2	1.06	0	2	18.161	4.183	0.0126516	0.0221049	0.3008	0.3329
AT5G56820.1	protein_coding	-	-	0	0	0	0	4	2	0	0	0	0	4	2	1.06	0	2	18.16	4.183	0.0126771	0.0221453	0.3015	0.3329
AT1G68380.1	protein_coding	-	-	0	0	0	5	2	1	0	0	0	3	2	1	1.11	0	2	18.155	4.182	0.00910212	0.0162681	0.276	0.3199
AT4G11390.2	protein_coding	-	-	0	0	0	5	2	1	0	0	0	3	2	1	1.11	0	2	18.155	4.182	0.00910179	0.0162681	0.276	0.3199
AT5G50361.1	protein_coding	-	-	0	0	0	5	2	1	0	0	0	3	2	1	1.11	0	2	18.155	4.182	0.00910858	0.0162765	0.2763	0.3199
AT5G59100.1	protein_coding	-	-	0	0	0	5	2	1	0	0	0	3	2	1	1.11	0	2	18.155	4.182	0.00910522	0.0162715	0.2762	0.3199
AT2G26355.1	lncRNA		other RNA	93	92	96	2243	1877	2295	119	99	105	1554	2075	2245	1032.88	108	1958	18.083	4.177	5.5445e-121	3.62349e-119	0.0151	0.0133
AT2G06255.1	protein_coding	ELF4-L3	ELF4-like 3	14	11	13	297	272	298	18	12	14	206	301	292	140.33	15	266	18.071	4.176	4.61996e-50	6.46771e-49	0.0268	0.0221
AT2G25940.1	protein_coding	ALPHA-VPE, ALPHAVPE	alpha-vacuolar processing enzyme	26	31	23	687	487	665	33	33	25	476	539	651	292.79	30	555	18.076	4.176	1.1458e-83	3.36652e-82	0.0174	0.0169
AT2G41380.1	protein_coding	-	-	215	188	168	4536	3996	4435	274	202	184	3144	4419	4339	2093.37	220	3967	18.068	4.175	5.42086e-91	1.89297e-89	0.0221	0.0125
AT1G67810.1	protein_coding	SUFE2	sulfur E2	49	72	61	1245	1401	1402	62	77	67	863	1549	1372	664.99	69	1261	18.05	4.174	5.53022e-125	3.93603e-123	0.0131	0.0144
AT2G47885.1	protein_coding	-	-	0	0	0	5	1	2	0	0	0	3	1	2	1.09	0	2	17.899	4.162	0.00492305	0.00914361	0.0526	0.32
AT5G52770.1	protein_coding	-	-	0	0	0	5	1	2	0	0	0	3	1	2	1.09	0	2	17.899	4.162	0.00492295	0.00914361	0.0526	0.32
AT3G13660.1	protein_coding	-	-	0	0	0	2	1	4	0	0	0	1	1	4	1.07	0	2	17.887	4.161	0.013203	0.0229764	0.4015	0.3262
AT1G09713.1	lncRNA			0	0	0	3	3	1	0	0	0	2	3	1	1.06	0	2	17.791	4.153	0.0128237	0.0223748	0.4016	0.3263
AT1G27461.1	protein_coding	-	-	0	0	0	3	3	1	0	0	0	2	3	1	1.06	0	2	17.791	4.153	0.0128185	0.0223673	0.4014	0.3263
at3g07515	miRNA			0	0	0	3	3	1	0	0	0	2	3	1	1.06	0	2	17.791	4.153	0.0128134	0.0223597	0.4012	0.3263
AT3G24605.1	protein_coding	-	-	0	1	0	8	7	13	0	1	0	6	8	13	4.51	0	9	17.79	4.153	8.64409e-05	0.000198852	0.212	0.2316
AT5G38240.2	protein_coding	-	-	21	26	16	552	394	476	27	28	17	383	436	466	226.01	24	428	17.786	4.153	6.77685e-69	1.46488e-67	0.0206	0.0181
AT1G64660.1	protein_coding	ATMGL, MGL	methionine gamma-lyase	93	103	109	3183	1719	2142	119	111	119	2206	1901	2095	1091.73	116	2067	17.758	4.15	1.46148e-159	2.17441e-157	0.0109	0.0132
AT1G71910.1	protein_coding	-	-	7	5	9	176	126	173	9	5	10	122	139	169	75.78	8	143	17.756	4.15	3.05607e-34	2.81466e-33	0.0348	0.0335
AT5G38900.1	protein_coding	-	-	26	19	14	348	570	411	33	20	15	241	630	402	223.73	23	424	17.682	4.144	1.66634e-35	1.58588e-34	0.0481	0.0182
AT1G27570.1	protein_coding	-	-	0	0	0	3	2	2	0	0	0	2	2	2	1.04	0	2	17.66	4.142	0.0122183	0.0213934	0.4013	0.3263
AT5G45070.1	protein_coding	AtPP2-A8, PP2-A8	phloem protein 2-A8	11	17	17	427	243	353	14	18	19	296	269	345	160.13	17	303	17.658	4.142	1.19194e-59	2.07983e-58	0.0216	0.0206
AT4G03540.1	protein_coding	CASPL1C1	CASP-like protein 1C1	7	5	2	122	85	114	9	5	2	85	94	112	51.09	5	97	17.623	4.139	7.39765e-23	4.6825e-22	0.0545	0.0471
AT5G01675.2	lncRNA			0	0	0	3	4	0	0	0	0	2	4	0	1.08	0	2	17.551	4.134	0.0156041	0.0268345	0.3821	0.3262
AT5G19473.2	protein_coding	-	-	0	0	0	3	4	0	0	0	0	2	4	0	1.08	0	2	17.553	4.134	0.0155788	0.0267958	0.3814	0.3262
AT2G09550.1	lncRNA			1	0	0	10	9	10	1	0	0	7	10	10	4.66	0	9	17.529	4.132	7.19381e-05	0.000166668	0.2105	0.2289
AT1G19960.1	protein_coding	-	-	127	82	119	2382	2061	2763	162	88	130	1651	2279	2703	1168.77	127	2211	17.52	4.131	9.54248e-73	2.21137e-71	0.0265	0.0131
AT1G69920.1	protein_coding	GSTU12, ATGSTU12	glutathione S-transferase TAU 12, ARABIDOPSIS THALIANA GLUTATHIONE S-TRANSFERASE TAU 12	3	0	0	16	29	28	4	0	0	11	32	27	12.39	1	23	17.49	4.128	1.51884e-06	4.09636e-06	0.2159	0.1473
AT2G03360.2	protein_coding	-	-	2	6	4	73	85	97	3	6	4	51	94	95	42.14	4	80	17.486	4.128	2.34603e-22	1.45533e-21	0.0483	0.0568
AT2G11810.1	protein_coding	MGD3, ATMGD3, MGDC	MONOGALACTOSYL DIACYLGLYCEROL SYNTHASE 3, monogalactosyldiacylglycerol synthase type C	119	157	167	4260	2665	2952	152	169	182	2952	2947	2888	1548.29	168	2929	17.47	4.127	2.46552e-154	3.13469e-152	0.0119	0.0127
AT1G15415.1	protein_coding	-	-	1	1	6	50	57	60	1	1	7	35	63	59	27.55	3	52	17.458	4.126	1.42094e-14	6.30375e-14	0.0808	0.0818
AT2G16385.1	protein_coding	-	-	21	19	5	293	304	369	27	20	5	203	336	361	158.8	17	300	17.437	4.124	1.74156e-27	1.28769e-26	0.0623	0.0208
AT2G02990.1	protein_coding	ATRNS1, RNS1	RIBONUCLEASE 1, ribonuclease 1	36	62	42	1239	934	883	46	67	46	859	1033	864	485.6	53	919	17.426	4.123	7.13119e-125	5.06261e-123	0.0118	0.0153
AT3G56780.2	protein_coding	-	-	0	2	0	19	18	9	0	2	0	13	20	9	7.34	1	14	17.426	4.123	2.70115e-06	7.119e-06	0.1652	0.1891
AT5G56800.1	protein_coding	-	-	0	0	0	9	0	1	0	0	0	6	0	1	1.2	0	2	17.343	4.116	0.0175788	0.0299578	0.382	0.3083
AT3G14060.1	protein_coding	-	-	48	40	43	991	895	976	61	43	47	687	990	955	463.72	50	877	17.318	4.114	9.73803e-91	3.38784e-89	0.0177	0.0154
AT4G22920.2	protein_coding	ATNYE1, NYE1, SGR, SGR1	STAY-GREEN 1, NON-YELLOWING 1, STAY-GREEN	272	300	305	7026	5807	6300	347	322	333	4869	6421	6163	3075.92	334	5818	17.307	4.113	1.94873e-143	2.01881e-141	0.0136	0.0128
AT1G55365.1	protein_coding	-	-	7	3	4	82	122	107	9	3	4	57	135	105	52.15	5	99	17.229	4.107	4.83956e-20	2.7419e-19	0.0654	0.0473
AT1G67000.1	protein_coding	-	-	1	2	2	50	33	33	1	2	2	35	36	32	18.17	2	34	17.168	4.102	1.68855e-12	6.70603e-12	0.0779	0.1101
AT4G22610.1	protein_coding	-	-	15	12	5	238	180	291	19	13	5	165	199	285	114.35	12	216	17.168	4.102	4.95997e-30	3.99699e-29	0.0504	0.0249
AT1G48698.2	lncRNA		Potential natural antisense gene, locus overlaps with AT1G48700	0	0	0	1	0	6	0	0	0	1	0	6	1.09	0	2	17.146	4.1	0.0211133	0.0354627	0.4073	0.3261
AT5G07035.1	lncRNA			1	0	0	5	8	16	1	0	0	3	9	16	4.87	0	9	17.15	4.1	0.000137504	0.000309123	0.2257	0.2284
AT5G04000.1	protein_coding	-	-	8	2	14	186	151	168	10	2	15	129	167	164	81.31	9	153	17.132	4.099	3.6002e-27	2.62927e-26	0.0518	0.0317
AT5G11210.6	protein_coding	ATGLR2.5, GLR2.5	glutamate receptor 2.5, ARABIDOPSIS THALIANA GLU	7	8	0	116	98	103	9	9	0	80	108	101	51.17	6	96	17.131	4.099	2.06096e-19	1.13972e-18	0.0708	0.0473
AT2G42000.2	protein_coding	AtMT4a	Arabidopsis thaliana metallothionein 4a	0	0	0	3	1	3	0	0	0	2	1	3	1.02	0	2	17.123	4.098	0.0139607	0.0242018	0.4041	0.3264
AT3G09155.1	lncRNA			0	0	0	0	6	0	0	0	0	0	7	0	1.11	0	2	17.119	4.098	0.0256518	0.0423984	0.3909	0.3328
AT3G54925.1	protein_coding	-	-	0	0	0	0	6	0	0	0	0	0	7	0	1.11	0	2	17.123	4.098	0.0256119	0.0423449	0.3903	0.3328
AT1G77240.1	protein_coding	AAE2	acyl activating enzyme 2	6	5	3	108	95	104	8	5	3	75	105	102	49.65	5	94	17.114	4.097	9.87161e-24	6.43184e-23	0.0489	0.0486
AT2G35070.1	protein_coding	-	-	2	3	0	65	29	26	3	3	0	45	32	25	18.05	2	34	17.113	4.097	9.27118e-12	3.54607e-11	0.0872	0.1086
AT2G13810.1	protein_coding	AtALD1, EDTS5, ALD1	eds two suppressor 5, AGD2-like defense response protein 1	1	7	1	44	79	49	1	8	1	30	87	48	29.28	3	55	17.093	4.095	1.03746e-15	4.85264e-15	0.0689	0.0789
AT3G11840.1	protein_coding	PUB24	plant U-box 24	39	46	43	965	911	855	50	49	47	669	1007	836	443.1	49	837	17.066	4.093	2.27854e-110	1.16301e-108	0.0133	0.0155
AT2G09545.1	lncRNA			0	0	0	1	3	2	0	0	0	1	3	2	0.99	0	2	17.055	4.092	0.0156756	0.0269475	0.4144	0.3331
AT3G09620.2	protein_coding	-	-	0	0	0	1	3	2	0	0	0	1	3	2	0.99	0	2	17.056	4.092	0.0156552	0.0269173	0.4137	0.3331
AT4G16855.1	protein_coding	-	-	0	0	0	1	3	2	0	0	0	1	3	2	0.99	0	2	17.056	4.092	0.0156585	0.0269214	0.4138	0.3331
AT3G46680.1	protein_coding	-	-	0	3	0	23	22	17	0	3	0	16	24	17	10.02	1	19	17.04	4.091	2.43504e-07	6.97283e-07	0.1548	0.1623
AT2G02835.1	protein_coding	-	-	0	0	2	29	8	15	0	0	2	20	9	15	7.63	1	15	17.001	4.088	2.83399e-06	7.45646e-06	0.1679	0.18
AT4G39670.1	protein_coding	-	-	23	18	16	343	425	461	29	19	17	238	470	451	204.13	22	386	17.008	4.088	7.66995e-44	9.09437e-43	0.0355	0.0188
AT1G69880.1	protein_coding	ATH8, TH8	thioredoxin H-type 8	37	44	47	768	917	1013	47	47	51	532	1014	991	447.16	48	846	16.993	4.087	1.07382e-95	4.11449e-94	0.0159	0.0155
AT5G54840.2	protein_coding	ATSGP1, SGP1		93	118	84	2027	1971	2261	119	127	92	1405	2179	2212	1022.19	113	1932	16.976	4.085	9.17963e-100	3.89626e-98	0.0181	0.0133
AT1G07317.1	lncRNA			0	0	0	1	4	1	0	0	0	1	4	1	1.02	0	2	16.961	4.084	0.0177243	0.0301836	0.4176	0.3331
AT4G07675.1	protein_coding	-	-	0	0	0	5	0	3	0	0	0	3	0	3	1.07	0	2	16.944	4.083	0.0158659	0.0272428	0.387	0.32
AT2G34500.1	protein_coding	CYP710A1	cytochrome P450, family 710, subfamily A, polypeptide 1	43	36	33	824	817	750	55	39	36	571	903	734	389.61	43	736	16.932	4.082	7.08204e-77	1.77661e-75	0.0206	0.0159
AT2G37870.1	protein_coding	-	-	7	5	6	222	78	119	9	5	7	154	86	116	62.89	7	119	16.773	4.068	3.71544e-30	3.00881e-29	0.0363	0.0384
AT1G04427.1	lncRNA			0	0	0	2	0	5	0	0	0	1	0	5	1.05	0	2	16.763	4.067	0.0189837	0.032162	0.3954	0.3263
AT2G40116.1	protein_coding	-	-	0	0	0	1	2	3	0	0	0	1	2	3	0.97	0	2	16.745	4.066	0.0162869	0.0279075	0.417	0.3331
AT3G61723.1	protein_coding	-	-	0	0	0	1	2	3	0	0	0	1	2	3	0.97	0	2	16.746	4.066	0.0162722	0.0278857	0.4164	0.3331
AT4G05780.1	lncRNA			0	0	0	1	2	3	0	0	0	1	2	3	0.97	0	2	16.746	4.066	0.016266	0.0278785	0.4162	0.3331
AT1G23840.1	protein_coding	-	-	7	15	1	140	134	183	9	16	1	97	148	179	75.06	9	141	16.737	4.065	2.61897e-20	1.49867e-19	0.0748	0.034
AT5G12910.1	protein_coding	-	-	0	0	0	0	1	5	0	0	0	0	1	5	1	0	2	16.734	4.065	0.0172695	0.0294629	0.3046	0.333
AT1G05510.1	protein_coding	OBAP1a	Oil Body-Associated Protein 1a	1	0	0	13	10	5	1	0	0	9	11	5	4.37	0	8	16.575	4.051	0.000126088	0.000284719	0.211	0.2321
AT1G16290.2	protein_coding	-	-	0	0	0	4	2	1	0	0	0	3	2	1	0.99	0	2	16.496	4.044	0.0154494	0.0265815	0.404	0.3265
AT2G19850.2	protein_coding	-	-	1	0	0	13	7	8	1	0	0	9	8	8	4.31	0	8	16.5	4.044	0.000113364	0.000257128	0.2093	0.2322
AT3G09685.1	lncRNA			0	0	0	4	2	1	0	0	0	3	2	1	0.99	0	2	16.496	4.044	0.0154407	0.0265682	0.4037	0.3265
AT3G29380.1	protein_coding	pBRP2	plant-specific TFIIB-related protein 2	0	0	0	4	2	1	0	0	0	3	2	1	0.99	0	2	16.496	4.044	0.0154546	0.0265889	0.4042	0.3265
AT5G05075.1	lncRNA			0	0	0	4	2	1	0	0	0	3	2	1	0.99	0	2	16.496	4.044	0.0154697	0.0266116	0.4048	0.3265
AT3G07920.1	protein_coding	-	-	0	0	0	6	1	1	0	0	0	4	1	1	1.04	0	2	16.44	4.039	0.0164854	0.0282251	0.3995	0.3201
AT2G32680.1	protein_coding	AtRLP23, RLP23	receptor like protein 23	20	25	14	443	404	361	25	27	15	307	447	353	195.76	22	369	16.4	4.036	3.56091e-62	6.66681e-61	0.0213	0.019
AT5G06475.1	lncRNA			2	0	0	16	9	24	3	0	0	11	10	23	7.84	1	15	16.328	4.029	7.72506e-06	1.96007e-05	0.1944	0.1836
AT3G48510.1	protein_coding	-	-	1	0	6	68	19	57	1	0	7	47	21	56	21.95	3	41	16.264	4.024	3.23046e-12	1.26696e-11	0.0889	0.0941
AT1G74010.1	protein_coding	-	-	33	46	46	945	750	845	42	49	50	655	829	827	408.77	47	770	16.255	4.023	2.64881e-113	1.44425e-111	0.0122	0.0158
AT5G02780.3	protein_coding	GSTL1	glutathione transferase lambda 1	18	19	5	268	277	294	23	20	5	186	306	288	138.07	16	260	16.254	4.023	3.78364e-31	3.15446e-30	0.0494	0.0223
AT3G62590.1	protein_coding	-	-	32	56	47	1144	737	893	41	60	51	793	815	874	438.94	51	827	16.251	4.022	5.7819e-110	2.92451e-108	0.0131	0.0156
AT2G29100.2	protein_coding	GLR2.9, ATGLR2.9	GLUTAMATE RECEPTOR 2.9, glutamate receptor 2.9	1	0	0	13	5	10	1	0	0	9	6	10	4.27	0	8	16.237	4.021	0.000136154	0.000306188	0.2098	0.2323
AT2G41690.1	protein_coding	HSFB3, AT-HSFB3	heat shock transcription factor B3, HEAT SHOCK TRANSCRIPTION FACTOR B3	2	0	3	38	33	35	3	0	3	26	36	34	17.15	2	32	16.157	4.014	9.99487e-11	3.59617e-10	0.0993	0.1163
AT1G08393.1	lncRNA			0	0	0	4	1	2	0	0	0	3	1	2	0.97	0	2	16.149	4.013	0.016247	0.0278492	0.4067	0.3265
AT4G37850.2	protein_coding	-	-	11	5	5	148	129	157	14	5	5	103	143	154	70.61	8	133	16.148	4.013	6.11993e-25	4.1448e-24	0.053	0.0357
AT1G04127.1	lncRNA			0	1	3	35	31	20	0	1	3	24	34	20	13.74	1	26	16.139	4.012	6.62844e-09	2.124e-08	0.1227	0.1341
AT1G53100.1	protein_coding	-	-	4	1	1	64	35	33	5	1	1	44	39	32	20.43	2	38	16.139	4.012	1.83214e-12	7.26903e-12	0.0834	0.1004
AT2G19960.3	protein_coding	-	-	0	0	0	3	0	4	0	0	0	2	0	4	1	0	2	16.129	4.012	0.0194558	0.0328761	0.4037	0.3264
AT3G50808.1	protein_coding	-	-	0	0	0	3	0	4	0	0	0	2	0	4	1	0	2	16.129	4.012	0.0194425	0.0328575	0.4033	0.3264
AT5G55360.1	protein_coding	-	-	0	0	0	3	0	4	0	0	0	2	0	4	1	0	2	16.125	4.011	0.0195268	0.0329881	0.4055	0.3264
AT5G25470.1	protein_coding	-	-	4	2	3	83	59	51	5	2	3	58	65	50	30.53	3	58	16.112	4.01	5.18082e-17	2.58958e-16	0.0614	0.0737
AT4G28085.1	protein_coding	-	-	7	3	8	105	114	145	9	3	9	73	126	142	60.26	7	114	16.081	4.007	1.67716e-24	1.12229e-23	0.0492	0.0412
AT5G06230.1	protein_coding	TBL9	TRICHOME BIREFRINGENCE-LIKE 9	20	15	10	339	253	332	25	16	11	235	280	325	148.67	17	280	16.077	4.007	3.10481e-42	3.53746e-41	0.0331	0.0214
AT4G12220.1	protein_coding	-	-	0	0	0	1	1	4	0	0	0	1	1	4	0.95	0	2	16.012	4.001	0.019875	0.0335278	0.4226	0.3332
AT4G22640.2	protein_coding	-	-	1	0	1	15	10	21	1	0	1	10	11	21	7.39	1	14	15.966	3.997	2.37145e-06	6.28379e-06	0.1469	0.1889
AT1G10480.1	protein_coding	ZFP5	zinc finger protein 5	12	18	9	277	239	259	15	19	10	192	264	253	125.68	15	236	15.943	3.995	9.33356e-45	1.13756e-43	0.028	0.0235
AT1G11300.1	protein_coding	EGM1	enhanced shoot growth under mannitol stress 1	37	59	59	1489	790	928	47	63	64	1032	874	908	498.05	58	938	15.932	3.994	5.16775e-108	2.53592e-106	0.0138	0.0152
AT1G15620.1	protein_coding	-	-	0	0	0	2	2	2	0	0	0	1	2	2	0.93	0	2	15.934	3.994	0.0172422	0.0294254	0.4165	0.3333
at2g09670	miRNA			0	0	0	2	2	2	0	0	0	1	2	2	0.93	0	2	15.934	3.994	0.0172245	0.0294006	0.4158	0.3333
AT2G38830.1	protein_coding	-	-	2	1	0	31	23	13	3	1	0	21	25	13	10.54	1	20	15.932	3.994	6.93838e-08	2.06857e-07	0.1236	0.1563
AT4G07195.1	lncRNA			0	0	0	2	2	2	0	0	0	1	2	2	0.93	0	2	15.934	3.994	0.0172616	0.029453	0.4172	0.3333
AT5G07050.1	protein_coding	UMAMIT9	Usually multiple acids move in and out Transporters 9	0	0	0	2	2	2	0	0	0	1	2	2	0.93	0	2	15.934	3.994	0.0172831	0.0294789	0.4181	0.3333
AT5G08930.1	lncRNA			0	0	0	2	2	2	0	0	0	1	2	2	0.93	0	2	15.934	3.994	0.0172815	0.029478	0.418	0.3333
AT5G40790.1	protein_coding	-	-	0	0	0	8	0	1	0	0	0	6	0	1	1.09	0	2	15.882	3.989	0.0216904	0.0363381	0.3903	0.3141
AT2G44990.3	protein_coding	MAX3, ATCCD7, CCD7	carotenoid cleavage dioxygenase 7	2	4	0	21	62	30	3	4	0	15	69	29	19.88	2	38	15.847	3.986	5.58829e-11	2.04193e-10	0.091	0.1088
AT3G29000.1	protein_coding	-	-	23	20	21	304	470	519	29	21	23	211	520	508	218.64	24	413	15.826	3.984	2.32395e-41	2.59909e-40	0.0369	0.0184
AT5G26900.1	protein_coding	AtCDC20.4, CDC20.4	cell division cycle 20.4	0	0	1	16	9	4	0	0	1	11	10	4	4.34	0	8	15.804	3.982	0.000186553	0.000413738	0.2184	0.2297
AT2G02580.1	protein_coding	CYP71B9	"cytochrome P450, family 71, subfamily B, polypeptide 9"	3	3	0	32	41	50	4	3	0	22	45	49	20.58	2	39	15.794	3.981	4.8758e-11	1.78837e-10	0.1022	0.1036
AT1G48130.1	protein_coding	PER1, ATPER1	1-cysteine peroxiredoxin 1	3	0	10	119	65	65	4	0	11	82	72	64	38.78	5	73	15.774	3.979	1.052e-13	4.44897e-13	0.1032	0.0594
AT3G50470.1	protein_coding	MLA10, HR3	INTRACELLULAR MILDEW A 10, homolog of RPW8 3	8	7	18	165	254	213	10	8	20	114	281	208	106.83	13	201	15.759	3.978	1.04018e-31	8.83269e-31	0.0422	0.0262
AT3G55870.2	protein_coding	-	-	0	0	0	7	1	0	0	0	0	5	1	0	0.99	0	2	15.735	3.976	0.0083775	0.0150557	0.0492	0.3203
AT5G26920.1	protein_coding	CBP60G	Cam-binding protein 60-like G	78	62	63	1411	1339	1278	99	67	69	978	1481	1250	657.25	78	1236	15.738	3.976	1.00499e-78	2.59801e-77	0.0214	0.0144
AT2G46940.1	protein_coding	-	-	6	2	11	159	95	123	8	2	12	110	105	120	59.56	7	112	15.693	3.972	1.16412e-24	7.83292e-24	0.049	0.0409
AT3G25260.1	protein_coding	NPF4.1, AtNPF4.1	NRT1/ PTR family 4.1	3	2	2	76	26	53	4	2	2	53	29	52	23.57	3	45	15.687	3.971	2.35032e-14	1.03106e-13	0.0663	0.0892
AT4G28460.1	protein_coding	-	-	0	4	0	11	27	29	0	4	0	8	30	28	11.69	1	22	15.687	3.971	4.03553e-07	1.1357e-06	0.1611	0.1531
AT4G39360.1	protein_coding	-	-	0	0	0	2	4	0	0	0	0	1	4	0	0.97	0	2	15.676	3.971	0.0231804	0.0386376	0.416	0.3332
AT5G01675.1	lncRNA			0	0	0	2	4	0	0	0	0	1	4	0	0.97	0	2	15.678	3.971	0.0231422	0.0385855	0.4151	0.3332
AT5G06920.1	protein_coding	FLA21	FASCICLIN-like arabinogalactan protein 21 precursor	0	0	0	2	4	0	0	0	0	1	4	0	0.97	0	2	15.68	3.971	0.023111	0.0385377	0.4144	0.3332
AT5G15190.2	protein_coding	-	-	24	24	30	594	442	511	31	26	33	412	489	500	248.24	30	467	15.682	3.971	2.90627e-76	7.20668e-75	0.0171	0.0176
AT1G78410.2	protein_coding	-	-	3	7	2	90	68	79	4	8	2	62	75	77	38.06	5	71	15.667	3.97	7.88882e-19	4.2664e-18	0.059	0.0613
AT1G80165.1	protein_coding	-	-	10	6	6	132	126	186	13	6	7	91	139	182	73.08	9	137	15.67	3.97	6.54701e-26	4.59424e-25	0.049	0.0348
AT2G47200.1	protein_coding	-	-	15	21	11	322	233	388	19	23	12	223	258	380	152.34	18	287	15.674	3.97	1.74641e-42	2.002e-41	0.0323	0.0212
AT5G41570.1	protein_coding	WRKY24, ATWRKY24	WRKY DNA-binding protein 24, ARABIDOPSIS THALIANA WRKY DNA-BINDING PROTEIN 24	4	6	0	82	59	56	5	6	0	57	65	55	31.4	4	59	15.658	3.969	1.9653e-15	9.0862e-15	0.0752	0.0721
AT1G12490.1	protein_coding	-	-	1	1	0	18	15	12	1	1	0	12	17	12	7.19	1	14	15.645	3.968	2.43035e-06	6.43378e-06	0.1458	0.1909
AT5G22520.1	protein_coding	-	-	5	2	0	27	61	58	6	2	0	19	67	57	25.24	3	48	15.639	3.967	7.14066e-09	2.28239e-08	0.159	0.09
AT1G73000.1	protein_coding	PYL3, RCAR13	PYR1-like 3, regulatory components of ABA receptor 13	2	3	0	51	31	23	3	3	0	35	34	22	16.32	2	30	15.618	3.965	9.82838e-11	3.53855e-10	0.0916	0.1181
AT1G15460.3	protein_coding	BOR4, ATBOR4	ARABIDOPSIS THALIANA REQUIRES HIGH BORON 4, REQUIRES HIGH BORON 4	7	13	6	309	105	152	9	14	7	214	116	149	84.73	10	160	15.581	3.962	2.26859e-30	1.84837e-29	0.0411	0.0301
AT3G27884.1	ncRNA		other RNA	1	3	0	28	20	35	1	3	0	19	22	34	13.38	1	25	15.547	3.959	1.41946e-08	4.44212e-08	0.1257	0.1368
AT1G79680.1	protein_coding	WAKL10, ATWAKL10	WALL ASSOCIATED KINASE (WAK)-LIKE 10	23	10	2	203	192	207	29	11	2	141	212	202	99.62	14	185	15.505	3.955	3.42837e-15	1.56385e-14	0.1112	0.0273
AT5G03204.1	protein_coding	-	-	0	0	4	38	21	20	0	0	4	26	23	20	12.25	1	23	15.505	3.955	3.68289e-07	1.04044e-06	0.1779	0.1418
AT3G01830.1	protein_coding	-	-	16	3	7	130	182	179	20	3	8	90	201	175	82.95	10	155	15.499	3.954	8.91643e-15	3.99234e-14	0.1102	0.0316
AT3G51240.1	protein_coding	F3'H, F3H, TT6	TRANSPARENT TESTA 6, flavanone 3-hydroxylase	289	271	237	8545	3494	4621	368	291	259	5922	3863	4521	2537.39	306	4769	15.489	3.953	1.42081e-145	1.53442e-143	0.0124	0.0126
AT5G10770.1	protein_coding	-	-	347	399	323	7951	5521	7577	442	429	353	5510	6105	7412	3375.2	408	6342	15.482	3.953	8.15405e-111	4.20031e-109	0.0169	0.0129
AT5G36970.1	protein_coding	NHL25	NDR1/HIN1-like 25	2	0	0	11	20	14	3	0	0	8	22	14	7.66	1	15	15.441	3.949	2.26836e-05	5.51196e-05	0.2223	0.19
AT4G15396.3	protein_coding	CYP702A6	"cytochrome P450, family 702, subfamily A, polypeptide 6"	16	8	4	230	138	182	20	9	4	159	153	178	87.23	11	163	15.431	3.948	7.85972e-27	5.6734e-26	0.051	0.0299
AT1G49810.1	protein_coding	NHD2, ATNHD2	SODIUM:HYDROGEN ANTIPORTER 2, Na+/H+ antiporter 2	0	0	0	2	1	3	0	0	0	1	1	3	0.9	0	2	15.386	3.944	0.0198155	0.0334354	0.4228	0.3333
AT3G23637.1	protein_coding	DVL21	DEVIL 21	0	0	0	2	1	3	0	0	0	1	1	3	0.9	0	2	15.387	3.944	0.0198039	0.0334179	0.4224	0.3333
AT3G27590.1	protein_coding	-	-	0	0	0	2	1	3	0	0	0	1	1	3	0.9	0	2	15.387	3.944	0.0197958	0.0334062	0.4221	0.3333
AT4G04930.1	protein_coding	DES-1-LIKE		0	0	0	2	1	3	0	0	0	1	1	3	0.9	0	2	15.387	3.944	0.0197706	0.0333677	0.4212	0.3333
AT1G45616.1	protein_coding	RLP6, AtRLP6	receptor like protein 6	36	32	33	1283	404	521	46	34	36	889	447	510	326.98	39	615	15.366	3.942	2.5724e-87	8.21378e-86	0.0152	0.0165
AT4G13261.1	protein_coding	-	-	0	0	0	7	0	1	0	0	0	5	0	1	0.97	0	2	15.354	3.941	0.00902427	0.0161413	0.0492	0.3203
AT1G08830.1	protein_coding	CSD1, AtSOD1, SOD1	superoxide dismutase 1, copper/zinc superoxide dismutase 1	507	618	580	12632	9751	10648	646	664	634	8754	10782	10416	5316.13	648	9984	15.352	3.94	2.76684e-141	2.74437e-139	0.0133	0.014
AT4G28811.1	protein_coding	-	-	0	0	0	4	0	3	0	0	0	3	0	3	0.95	0	2	15.314	3.937	0.0213087	0.0357565	0.4046	0.3266
AT1G33102.1	protein_coding	-	-	5	15	4	164	123	160	6	16	4	114	136	157	72.17	9	136	15.302	3.936	2.26378e-25	1.55808e-24	0.0506	0.0349
AT1G26921.1	protein_coding	-	-	0	1	0	6	10	6	0	1	0	4	11	6	3.69	0	7	15.289	3.934	0.00035404	0.000761289	0.2235	0.25
AT1G34050.1	protein_coding	-	-	1	0	3	37	30	18	1	0	3	26	33	18	13.5	1	26	15.274	3.933	2.35644e-08	7.25742e-08	0.132	0.1353
AT5G62490.1	protein_coding	ATHVA22B, HVA22B	HVA22 homologue B, ARABIDOPSIS THALIANA HVA22 HOMOLOGUE B	1	0	1	22	11	13	1	0	1	15	12	13	7.08	1	13	15.221	3.928	2.98308e-06	7.83178e-06	0.1458	0.1896
AT4G25433.1	protein_coding	-	-	0	1	0	19	5	5	0	1	0	13	6	5	4.11	0	8	15.206	3.927	0.000253275	0.000554072	0.2135	0.2302
AT5G57510.1	protein_coding	-	-	6	0	0	27	44	26	8	0	0	19	49	25	16.74	3	31	15.201	3.926	1.17148e-05	2.92203e-05	0.2825	0.1214
AT4G09820.1	protein_coding	AtTT8, BHLH42, TT8	TRANSPARENT TESTA 8	20	18	28	685	328	331	25	19	31	475	363	324	206.11	25	387	15.165	3.923	7.15353e-60	1.26081e-58	0.0219	0.0186
AT5G05340.1	protein_coding	PRX52	peroxidase 52	25	7	6	292	210	184	32	8	7	202	232	180	110.08	16	205	15.166	3.923	1.50358e-23	9.74436e-23	0.0649	0.0254
AT4G23610.1	protein_coding	-	-	6	9	3	106	121	109	8	10	3	73	134	107	55.75	7	105	15.156	3.922	3.49899e-24	2.31865e-23	0.0464	0.0442
AT5G39160.1	protein_coding	-	-	8	22	14	230	285	277	10	24	15	159	315	271	132.44	16	248	15.153	3.922	1.83505e-48	2.45825e-47	0.0241	0.0229
AT4G03320.1	protein_coding	Tic20-IV, AtTic20-IV	translocon at the inner envelope membrane of chloroplasts 20-IV	58	86	56	1367	1051	1366	74	92	61	947	1162	1336	612.22	76	1148	15.103	3.917	2.44856e-97	9.77015e-96	0.016	0.0146
AT4G05055.1	snoRNA			0	0	0	0	3	2	0	0	0	0	3	2	0.88	0	2	15.101	3.917	0.0245289	0.0407276	0.4146	0.3405
AT4G27654.1	protein_coding	-	-	1	0	4	27	20	45	1	0	4	19	22	44	15.08	2	28	15.101	3.917	1.35411e-09	4.53712e-09	0.103	0.1272
AT1G49250.1	protein_coding	-	-	0	0	0	0	3	2	0	0	0	0	3	2	0.88	0	2	15.098	3.916	0.024612	0.0408438	0.4167	0.3405
AT1G76290.1	protein_coding	-	-	0	0	0	0	3	2	0	0	0	0	3	2	0.88	0	2	15.098	3.916	0.0246045	0.0408361	0.4165	0.3405
AT2G26480.1	protein_coding	UGT76D1	UDP-glucosyl transferase 76D1	11	9	11	226	179	191	14	10	12	157	198	187	96.18	12	181	15.091	3.916	4.19691e-38	4.27501e-37	0.0303	0.0279
AT2G31335.1	protein_coding	-	-	0	0	0	0	3	2	0	0	0	0	3	2	0.88	0	2	15.099	3.916	0.0245785	0.0407978	0.4158	0.3405
AT3G17152.1	protein_coding	-	-	0	0	0	0	3	2	0	0	0	0	3	2	0.88	0	2	15.1	3.916	0.0245504	0.0407561	0.4151	0.3405
AT3G22565.2	protein_coding	-	-	0	2	1	30	15	19	0	2	1	21	17	19	9.87	1	19	15.082	3.915	1.71703e-07	4.97124e-07	0.1303	0.1604
AT4G37140.1	protein_coding	MEE69, MES20, ATMES20	METHYL ESTERASE 20, ARABIDOPSIS THALIANA METHYL ESTERASE 20, MATERNAL EFFECT EMBRYO ARREST 69	4	9	2	89	82	108	5	10	2	62	91	106	45.83	6	86	15.071	3.914	1.46682e-19	8.15837e-19	0.0596	0.0524
AT1G24420.1	protein_coding	-	-	2	1	1	30	17	37	3	1	1	21	19	36	13.42	2	25	15.055	3.912	3.41707e-09	1.11449e-08	0.1019	0.136
AT1G50390.1	protein_coding	-	-	1	3	0	23	25	28	1	3	0	16	28	27	12.58	1	24	15.057	3.912	2.0776e-08	6.42695e-08	0.1221	0.1436
AT3G18560.1	protein_coding	-	-	16	19	20	390	285	372	20	20	22	270	315	364	168.66	21	316	15.058	3.912	6.74185e-59	1.15691e-57	0.0204	0.0202
AT1G08090.1	protein_coding	NRT2;1AT, NRT2, NRT2.1, ATNRT2.1, ACH1, LIN1, NRT2:1, ATNRT2:1	NITRATE TRANSPORTER 2.1, LATERAL ROOT INITIATION 1, NITRATE TRANSPORTER 2, nitrate transporter 2:1	51	36	34	797	630	886	65	39	37	552	697	867	376.09	47	705	15.035	3.91	2.02096e-58	3.43636e-57	0.0269	0.016
AT5G19875.1	protein_coding	-	-	13	31	13	418	314	319	17	33	14	290	347	312	168.84	21	316	15.034	3.91	1.08083e-50	1.52995e-49	0.0258	0.0202
AT3G21370.1	protein_coding	BGLU19	beta glucosidase 19	12	6	10	272	127	161	15	6	11	189	140	157	86.52	11	162	15.021	3.909	9.05192e-36	8.69177e-35	0.0314	0.0299
AT2G04775.1	lncRNA			0	0	0	0	4	1	0	0	0	0	4	1	0.9	0	2	14.996	3.907	0.0270632	0.0445837	0.4031	0.3405
AT2G21910.1	protein_coding	CYP96A5	"cytochrome P450, family 96, subfamily A, polypeptide 5"	0	0	0	0	4	1	0	0	0	0	4	1	0.9	0	2	14.998	3.907	0.0270216	0.0445256	0.4023	0.3405
AT3G13630.1	protein_coding	-	-	0	0	0	0	4	1	0	0	0	0	4	1	0.9	0	2	14.999	3.907	0.027016	0.044519	0.4021	0.3405
AT1G09537.1	lncRNA			0	0	0	0	4	1	0	0	0	0	4	1	0.9	0	2	14.994	3.906	0.0271015	0.0446336	0.4039	0.3405
AT1G24145.1	protein_coding	-	-	9	15	10	177	208	240	11	16	11	123	230	235	104.33	13	196	14.995	3.906	5.51602e-39	5.75918e-38	0.0297	0.0265
AT2G17040.1	protein_coding	NAC036, anac036	NAC domain containing protein 36	48	50	46	907	892	905	61	54	50	629	986	885	444.23	55	833	14.973	3.904	4.85947e-90	1.65964e-88	0.0161	0.0155
AT5G55980.1	protein_coding	-	-	0	0	0	5	1	1	0	0	0	3	1	1	0.92	0	2	14.913	3.899	0.0215081	0.0360631	0.4195	0.3267
AT5G08105.1	lncRNA			2	0	2	48	12	27	3	0	2	33	13	26	12.95	2	24	14.908	3.898	4.51227e-09	1.46181e-08	0.0991	0.1347
AT1G05953.1	lncRNA			0	0	0	3	2	1	0	0	0	2	2	1	0.88	0	2	14.854	3.893	0.021208	0.0356068	0.4264	0.3334
AT1G23640.1	protein_coding	-	-	0	0	0	3	2	1	0	0	0	2	2	1	0.88	0	2	14.854	3.893	0.0212116	0.0356108	0.4266	0.3334
AT4G23320.2	protein_coding	CRK24	cysteine-rich RLK (RECEPTOR-like protein kinase) 24	4	6	4	99	85	80	5	6	4	69	94	78	42.8	5	80	14.86	3.893	6.39483e-22	3.9046e-21	0.046	0.0555
AT4G39210.1	protein_coding	APL3		525	666	603	16798	8492	9671	669	716	659	11641	9390	9461	5422.61	681	10164	14.844	3.892	5.85733e-131	4.62812e-129	0.0141	0.014
AT2G17280.2	protein_coding	-	-	113	132	97	2611	1708	2133	144	142	106	1809	1889	2087	1029.43	131	1928	14.81	3.888	8.427e-115	4.75225e-113	0.0143	0.0133
AT1G51300.3	protein_coding	-	-	0	0	0	0	2	3	0	0	0	0	2	3	0.86	0	2	14.799	3.887	0.0254679	0.0421441	0.4165	0.3406
AT5G13330.1	protein_coding	Rap2.6L	related to AP2 6l	51	43	57	921	878	997	65	46	62	638	971	975	459.65	58	861	14.754	3.883	6.66766e-83	1.92468e-81	0.0179	0.0154
AT1G47510.3	protein_coding	5PTASE11, AT5PTASE11	ARABIDOPSIS THALIANA INOSITOL POLYPHOSPHATE 5-PHOSPHATASE 11, inositol polyphosphate 5-phosphatase 11	21	7	17	258	285	286	27	8	19	179	315	280	137.76	18	258	14.741	3.882	7.4674e-27	5.39578e-26	0.0564	0.0224
AT2G20142.1	protein_coding	-	-	43	57	27	732	757	821	55	61	30	507	837	803	382.17	49	716	14.743	3.882	3.35518e-60	5.97375e-59	0.0256	0.016
AT5G46295.1	protein_coding	-	-	4	3	4	65	63	79	5	3	4	45	70	77	34.11	4	64	14.746	3.882	1.39382e-17	7.16008e-17	0.058	0.0682
AT1G30920.1	protein_coding	-	-	1	1	2	23	36	19	1	1	2	16	40	19	13.14	1	25	14.728	3.88	9.55151e-09	3.02531e-08	0.107	0.1411
AT1G20180.1	protein_coding	-	-	0	0	4	22	16	29	0	0	4	15	18	28	10.95	1	20	14.715	3.879	4.00798e-07	1.12841e-06	0.1576	0.1544
AT5G03155.1	lncRNA			0	0	0	3	3	0	0	0	0	2	3	0	0.9	0	2	14.684	3.876	0.0251378	0.0416399	0.4188	0.3334
AT5G18661.1	protein_coding	-	-	5	0	1	26	37	51	6	0	1	18	41	50	19.38	2	36	14.683	3.876	2.2227e-07	6.38374e-07	0.1916	0.1089
AT1G77120.1	protein_coding	ADH1, ATADH, ADH, ATADH1	ARABIDOPSIS THALIANA ALCOHOL DEHYDROGENASE, ALCOHOL DEHYDROGENASE, alcohol dehydrogenase 1	180	186	109	4002	2092	2834	229	200	119	2773	2313	2772	1401.24	183	2619	14.653	3.873	1.77365e-83	5.18942e-82	0.021	0.0128
AT3G54150.1	protein_coding	EFD	EXINE FORMATION DEFECTIVE	22	15	26	361	366	428	28	16	28	250	405	419	191.02	24	358	14.656	3.873	6.48394e-49	8.81256e-48	0.0276	0.0192
AT4G09780.1	protein_coding	-	-	0	2	0	6	15	14	0	2	0	4	17	14	6.1	1	12	14.623	3.87	3.89614e-05	9.25118e-05	0.194	0.2105
AT5G64000.1	protein_coding	SAL2, ATSAL2		19	14	25	408	329	333	24	15	27	283	364	326	173.15	22	324	14.612	3.869	2.70579e-51	3.87923e-50	0.025	0.02
AT1G70000.1	protein_coding	MYBD		178	191	183	3901	2857	3452	227	205	200	2703	3159	3377	1645.26	211	3080	14.58	3.866	6.45154e-128	4.79936e-126	0.0133	0.0126
AT4G21840.1	protein_coding	MSRB8, ATMSRB8	methionine sulfoxide reductase B8	13	1	3	90	79	110	17	1	3	62	87	108	46.38	7	86	14.575	3.865	6.68806e-11	2.42982e-10	0.1414	0.052
AT2G43500.10	protein_coding	NLP8	NIN-like protein 8	193	273	217	6665	3214	3298	246	293	237	4619	3554	3226	2029.26	259	3800	14.529	3.861	8.49793e-120	5.35351e-118	0.0145	0.0125
AT2G45210.1	protein_coding	SAG201, SAUR36	SMALL AUXIN UPREGULATED 36, senescence-associated gene 201	54	67	65	1159	1024	1192	69	72	71	803	1132	1166	552.24	71	1034	14.525	3.861	4.31884e-113	2.3366e-111	0.0125	0.0149
AT1G08087.1	lncRNA			0	0	0	3	1	2	0	0	0	2	1	2	0.86	0	2	14.52	3.86	0.0221686	0.0370794	0.4256	0.3335
AT1G34390.1	protein_coding	ARF22	auxin response factor 22	0	0	0	3	1	2	0	0	0	2	1	2	0.86	0	2	14.52	3.86	0.0222378	0.0371795	0.428	0.3335
AT3G03765.1	lncRNA			0	0	0	3	1	2	0	0	0	2	1	2	0.86	0	2	14.52	3.86	0.0222395	0.0371801	0.428	0.3335
AT5G22765.1	protein_coding	-	-	0	0	0	3	1	2	0	0	0	2	1	2	0.86	0	2	14.52	3.86	0.0222212	0.037154	0.4274	0.3335
AT5G03585.1	lncRNA			3	6	1	86	42	65	4	6	1	60	46	64	30.17	4	57	14.504	3.858	1.30215e-14	5.78685e-14	0.0759	0.0738
AT3G59580.2	protein_coding	NLP9	NIN-like protein 9	63	61	64	1709	940	924	80	66	70	1184	1039	904	557.24	72	1042	14.437	3.852	2.89264e-120	1.85573e-118	0.0116	0.0149
AT4G13030.1	protein_coding	-	-	56	60	51	1159	874	1022	71	64	56	803	966	1000	493.5	64	923	14.444	3.852	2.30094e-104	1.06204e-102	0.0135	0.0152
AT2G34960.1	protein_coding	CAT5	cationic amino acid transporter 5	36	59	55	1225	784	758	46	63	60	849	867	742	437.79	56	819	14.422	3.85	5.93188e-102	2.64626e-100	0.0134	0.0156
AT1G32910.1	protein_coding	-	-	1	0	0	10	7	7	1	0	0	7	8	7	3.8	0	7	14.394	3.847	0.000347774	0.000748506	0.2263	0.2439
AT5G23950.2	protein_coding	-	-	11	6	0	103	95	91	14	6	0	71	105	89	47.65	7	88	14.393	3.847	1.59031e-13	6.66407e-13	0.1065	0.0507
AT5G24530.1	protein_coding	AtDMR6, DMR6	DOWNY MILDEW RESISTANT 6	101	114	83	1919	1755	1685	129	123	91	1330	1941	1648	876.79	114	1640	14.352	3.843	4.5547e-101	1.99373e-99	0.0158	0.0137
AT5G53420.4	protein_coding	-	-	548	738	626	13102	10204	11112	698	793	684	9080	11283	10870	5568.14	725	10411	14.326	3.841	1.33566e-135	1.18603e-133	0.0133	0.0141
AT1G04683.1	lncRNA			0	0	0	2	0	4	0	0	0	1	0	4	0.88	0	2	14.314	3.839	0.0281491	0.0462444	0.4287	0.3334
AT1G23915.1	protein_coding	-	-	0	0	0	2	0	4	0	0	0	1	0	4	0.88	0	2	14.315	3.839	0.0281285	0.0462188	0.4282	0.3334
AT2G09885.1	lncRNA			0	0	0	2	0	4	0	0	0	1	0	4	0.88	0	2	14.314	3.839	0.0281402	0.0462326	0.4285	0.3334
AT1G25340.1	protein_coding	AtMYB116, MYB116	myb domain protein 116	0	0	0	5	0	2	0	0	0	3	0	2	0.9	0	2	14.261	3.834	0.0259602	0.0428701	0.4155	0.3267
AT1G53270.1	protein_coding	ABCG10	ATP-binding cassette G10	9	9	14	204	166	202	11	10	15	141	184	198	93.16	12	174	14.263	3.834	6.19768e-37	6.1343e-36	0.0299	0.0286
AT5G42290.1	protein_coding	-	-	0	0	0	5	0	2	0	0	0	3	0	2	0.9	0	2	14.261	3.834	0.0259651	0.042873	0.4156	0.3267
AT1G52880.1	protein_coding	ATNAM, NARS2, NAM, ANAC018	Arabidopsis NAC domain containing protein 18, NAC-REGULATED SEED MORPHOLOGY 2, NO APICAL MERISTEM	99	128	121	2595	1710	1983	126	138	132	1798	1891	1940	1004.17	132	1876	14.205	3.828	6.72222e-140	6.4837e-138	0.011	0.0134
AT1G35515.1	protein_coding	MYB8, HOS10	high response to osmotic stress 10	19	31	20	359	389	476	24	33	22	249	430	466	203.99	26	382	14.194	3.827	6.27263e-56	1.01242e-54	0.0227	0.0188
AT2G02930.1	protein_coding	ATGSTF3, GST16, GSTF3	GLUTATHIONE S-TRANSFERASE 16, glutathione S-transferase F3	5	6	5	95	100	90	6	6	5	66	111	88	47.12	6	88	14.179	3.826	1.44404e-22	9.02194e-22	0.0447	0.0513
AT3G54530.3	protein_coding	-	-	0	0	0	1	3	1	0	0	0	1	3	1	0.83	0	2	14.18	3.826	0.0270462	0.0445582	0.4357	0.3407
AT4G13240.1	protein_coding	ATROPGEF9, ROPGEF9	ROP (rho of plants) guanine nucleotide exchange factor 9	0	0	0	1	3	1	0	0	0	1	3	1	0.83	0	2	14.18	3.826	0.0270391	0.0445491	0.4356	0.3407
AT5G60910.1	protein_coding	FUL, AGL8	FRUITFULL, AGAMOUS-like 8	3	2	7	63	81	67	4	2	8	44	90	66	35.4	5	67	14.179	3.826	6.13085e-16	2.90802e-15	0.069	0.0665
AT2G39050.1	protein_coding	EULS3, ArathEULS3	Euonymus lectin S3	127	157	122	3048	2030	2250	162	169	133	2112	2245	2201	1170.32	155	2186	14.177	3.825	1.15821e-133	9.61318e-132	0.0119	0.0131
AT1G06987.1	lncRNA			0	0	0	1	2	2	0	0	0	1	2	2	0.81	0	2	14.12	3.82	0.025644	0.0423904	0.4355	0.3407
AT4G08360.1	protein_coding	-	-	0	0	0	1	2	2	0	0	0	1	2	2	0.81	0	2	14.12	3.82	0.0256484	0.0423953	0.4356	0.3407
AT2G31110.3	protein_coding	TBL40	TRICHOME BIREFRINGENCE-LIKE 40	97	133	117	2542	1709	1956	124	143	128	1762	1890	1913	993.2	132	1855	14.105	3.818	6.23326e-137	5.73522e-135	0.0112	0.0134
AT1G21250.1	protein_coding	WAK1, PRO25, AtWAK1	cell wall-associated kinase 1	423	502	327	8639	6704	6728	539	539	357	5987	7413	6582	3569.57	478	6661	14.084	3.816	1.39347e-108	6.89853e-107	0.0163	0.013
AT4G36610.1	protein_coding	-	-	38	36	28	656	524	638	48	39	31	455	579	624	295.98	39	553	14.068	3.814	1.51062e-66	3.10003e-65	0.0206	0.0169
AT3G11430.1	protein_coding	GPAT5, ATGPAT5	GLYCEROL-3-PHOSPHATE sn-2-ACYLTRANSFERASE 5	25	27	20	486	362	436	32	29	22	337	400	427	207.72	28	388	14.05	3.812	1.04792e-59	1.83081e-58	0.0211	0.0186
AT4G25480.1	protein_coding	CBF3, DREB1A, ATCBF3	dehydration response element B1A, C-REPEAT BINDING FACTOR 3	14	40	39	737	407	496	18	43	43	511	450	485	258.24	35	482	14.033	3.811	1.02404e-53	1.5618e-52	0.0264	0.0174
AT3G29250.3	protein_coding	AtSDR4, SDR4	short-chain dehydrogenase reductase 4	122	94	61	1677	1365	1766	155	101	67	1162	1509	1728	787.05	108	1466	14.026	3.81	1.63665e-45	2.03461e-44	0.0376	0.0139
AT1G67865.1	protein_coding	-	-	245	225	310	4271	4152	5284	312	242	339	2960	4591	5169	2268.8	298	4240	14.01	3.808	2.93769e-87	9.34813e-86	0.02	0.0125
AT1G10585.1	protein_coding	-	-	11	18	17	196	309	274	14	19	19	136	342	268	132.91	17	249	13.973	3.805	1.40572e-44	1.70509e-43	0.0255	0.0229
AT3G26800.1	protein_coding	-	-	0	0	1	8	3	11	0	0	1	6	3	11	3.45	0	7	13.979	3.805	0.000638222	0.00133311	0.2243	0.2505
AT1G28650.1	protein_coding	-	-	1	3	0	20	29	19	1	3	0	14	32	19	11.5	1	22	13.959	3.803	7.90107e-08	2.34409e-07	0.1217	0.1526
AT1G70810.1	protein_coding	CAR7	C2-domain ABA-related7	312	454	325	6539	5783	6602	398	488	355	4532	6395	6458	3104.21	414	5795	13.945	3.802	1.292e-112	6.92307e-111	0.0155	0.0128
AT4G04710.2	protein_coding	CPK22	calcium-dependent protein kinase 22	4	0	11	68	86	84	5	0	12	47	95	82	40.25	6	75	13.866	3.793	8.93033e-13	3.60344e-12	0.1049	0.0594
AT4G00700.2	protein_coding	-	-	104	90	54	1939	1084	1354	133	97	59	1344	1199	1325	692.53	96	1289	13.833	3.79	3.21794e-77	8.13824e-76	0.0205	0.0143
AT2G47810.1	protein_coding	NF-YB5	"nuclear factor Y, subunit B5"	2	0	0	12	9	20	3	0	0	8	10	20	6.73	1	13	13.825	3.789	5.73138e-05	0.000133828	0.225	0.1983
AT3G05937.1	protein_coding	-	-	39	51	63	848	747	1014	50	55	69	588	826	992	429.83	58	802	13.782	3.785	1.21161e-103	5.54663e-102	0.0125	0.0156
AT5G65300.1	protein_coding	-	-	24	18	21	337	328	435	31	19	23	234	363	426	182.44	24	341	13.77	3.783	4.40857e-44	5.27426e-43	0.03	0.0196
AT4G17660.1	protein_coding	-	-	6	5	3	58	83	107	8	5	3	40	92	105	42.16	5	79	13.751	3.781	1.12559e-16	5.52735e-16	0.0672	0.0573
AT1G01250.1	protein_coding	-	-	21	30	39	760	410	440	27	32	43	527	453	430	252.02	34	470	13.736	3.78	1.93219e-64	3.79531e-63	0.0201	0.0175
AT1G30500.2	protein_coding	NF-YA7	"nuclear factor Y, subunit A7"	84	60	102	1777	1199	1301	107	64	111	1231	1326	1273	685.5	94	1277	13.729	3.779	1.27507e-89	4.30735e-88	0.0171	0.0143
AT5G66670.3	protein_coding	-	-	5	2	6	103	69	63	6	2	7	71	76	62	37.4	5	70	13.731	3.779	1.27171e-17	6.54117e-17	0.0596	0.0619
AT3G10430.1	protein_coding	-	-	0	0	2	4	14	15	0	0	2	3	15	15	5.85	1	11	13.686	3.775	9.95687e-05	0.000227406	0.2097	0.2151
AT1G07117.1	lncRNA			0	0	0	3	0	3	0	0	0	2	0	3	0.84	0	2	13.638	3.77	0.0294403	0.0481846	0.4266	0.3335
AT2G10455.1	protein_coding	-	-	0	0	0	3	0	3	0	0	0	2	0	3	0.84	0	2	13.638	3.77	0.0294334	0.048176	0.4265	0.3335
AT3G22240.1	protein_coding	-	-	209	217	147	2858	2983	4006	266	233	161	1981	3298	3919	1643.02	220	3066	13.643	3.77	8.57792e-47	1.10162e-45	0.0372	0.0126
AT3G46140.1	protein_coding	-	-	0	0	0	3	0	3	0	0	0	2	0	3	0.84	0	2	13.638	3.77	0.0294177	0.0481532	0.4261	0.3335
AT4G02650.1	protein_coding	-	-	0	2	1	18	16	19	0	2	1	12	18	19	8.67	1	16	13.606	3.766	9.73123e-07	2.65995e-06	0.1364	0.1753
AT5G48670.1	protein_coding	FEM111, AGL80	AGAMOUS-like 80	16	13	14	270	221	250	20	14	15	187	244	245	120.95	16	225	13.571	3.762	8.53025e-41	9.40108e-40	0.0284	0.024
AT1G33090.1	protein_coding	-	-	3	0	2	40	27	25	4	0	2	28	30	24	14.67	2	27	13.555	3.761	4.95452e-09	1.60063e-08	0.1106	0.128
AT3G25577.1	protein_coding	-	-	0	0	0	1	1	3	0	0	0	1	1	3	0.79	0	2	13.562	3.761	0.0292738	0.0479374	0.4359	0.3408
AT4G19975.1	protein_coding	-	-	14	21	11	335	207	255	18	23	12	232	229	249	127.16	18	237	13.538	3.759	5.10307e-42	5.78824e-41	0.0279	0.0232
at2g47275	miRNA	MIR403	MIR403; miRNA	1	1	0	13	11	15	1	1	0	9	12	15	6.37	1	12	13.517	3.757	1.60826e-05	3.95747e-05	0.1631	0.2025
AT3G57700.1	protein_coding	-	-	15	19	13	248	238	309	19	20	14	172	263	302	131.84	18	246	13.488	3.754	5.83161e-41	6.45748e-40	0.029	0.0229
AT1G53980.1	protein_coding	-	-	2	1	0	17	21	17	3	1	0	12	23	17	9.21	1	17	13.472	3.752	1.59341e-06	4.29168e-06	0.1509	0.1718
AT5G40690.1	protein_coding	-	-	63	33	64	815	883	970	80	35	70	565	976	949	445.96	62	830	13.453	3.75	3.93879e-41	4.38408e-40	0.0388	0.0155
AT1G35710.1	protein_coding	-	-	59	69	61	1471	933	880	75	74	67	1019	1032	861	521.32	72	971	13.443	3.749	8.51675e-116	4.92194e-114	0.0114	0.0151
AT5G23160.1	protein_coding	-	-	2	1	3	35	43	28	3	1	3	24	48	27	17.68	2	33	13.439	3.748	2.7214e-10	9.55444e-10	0.093	0.1151
AT2G37740.1	protein_coding	ATZFP10, ZFP10	ZINC-FINGER PROTEIN 10, zinc-finger protein 10	9	0	4	69	85	60	11	0	4	48	94	59	36.06	5	67	13.427	3.747	6.47058e-10	2.21718e-09	0.144	0.0655
AT5G24040.3	protein_coding	-	-	0	2	0	16	8	14	0	2	0	11	9	14	5.96	1	11	13.384	3.742	6.21709e-05	0.00014477	0.213	0.2052
AT2G31985.1	protein_coding	-	-	0	0	0	4	1	1	0	0	0	3	1	1	0.81	0	2	13.372	3.741	0.0283218	0.0464954	0.4356	0.3336
AT2G47770.1	protein_coding	ATTSPO, TSPO	TSPO(outer membrane tryptophan-rich sensory protein)-related	5	0	2	66	30	30	6	0	2	46	33	29	19.47	3	36	13.372	3.741	1.15418e-10	4.1352e-10	0.0956	0.1035
AT5G33390.1	protein_coding	-	-	0	0	0	4	1	1	0	0	0	3	1	1	0.81	0	2	13.371	3.741	0.0283439	0.0465235	0.4362	0.3336
AT5G38580.1	protein_coding	-	-	0	0	0	4	1	1	0	0	0	3	1	1	0.81	0	2	13.372	3.741	0.0283139	0.0464852	0.4354	0.3336
AT1G71690.1	protein_coding	-	-	0	2	1	17	19	15	0	2	1	12	21	15	8.45	1	16	13.326	3.736	1.32109e-06	3.5789e-06	0.1354	0.1784
AT2G40370.1	protein_coding	LAC5	laccase 5	29	32	25	623	353	507	37	34	27	432	390	496	236.12	33	439	13.301	3.734	3.29862e-64	6.42966e-63	0.0192	0.0179
AT2G43670.1	protein_coding	-	-	11	3	7	125	100	130	14	3	8	87	111	127	58.21	8	108	13.303	3.734	5.73045e-20	3.23288e-19	0.0603	0.0422
AT1G13500.1	protein_coding	-	-	0	2	0	17	12	7	0	2	0	12	13	7	5.67	1	11	13.286	3.732	6.02056e-05	0.000140369	0.1966	0.2096
AT4G23450.4	protein_coding	AIRP1, AtAIRP1	ABA Insensitive RING Protein 1	13	17	17	263	234	281	17	18	19	182	259	275	128.22	18	239	13.279	3.731	2.68302e-45	3.32066e-44	0.0243	0.0232
AT4G40020.1	protein_coding	-	-	3	6	8	160	58	92	4	6	9	111	64	90	47.34	6	88	13.275	3.731	8.21602e-21	4.79571e-20	0.0494	0.0493
AT2G35300.1	protein_coding	LEA18, AtLEA4-2, LEA4-2	late embryogenesis abundant 18, late embryogenesis abundant 4-2	7	3	3	113	69	49	9	3	3	78	76	48	36.33	5	67	13.273	3.73	2.44775e-17	1.24348e-16	0.0576	0.0631
AT3G02240.1	protein_coding	RGF7, GLV4	GOLVEN 4, root meristem growth factor 7	5	11	1	71	100	92	6	12	1	49	111	90	44.84	6	83	13.231	3.726	9.31878e-17	4.59386e-16	0.0685	0.0541
AT4G39955.1	protein_coding	-	-	84	116	112	2020	1487	1680	107	125	122	1400	1644	1643	840.28	118	1562	13.223	3.725	1.83303e-129	1.41244e-127	0.0111	0.0138
AT3G04530.1	protein_coding	PPCK2, ATPPCK2, PEPCK2	phosphoenolpyruvate carboxylase kinase 2, PHOSPHOENOLPYRUVATE CARBOXYLASE KINASE 2	2	4	5	54	51	75	3	4	5	37	56	73	29.92	4	55	13.211	3.724	5.05221e-16	2.40701e-15	0.057	0.0762
AT5G07330.1	protein_coding	-	-	1	1	0	13	17	7	1	1	0	9	19	7	6.17	1	12	13.213	3.724	2.57445e-05	6.219e-05	0.1599	0.2067
AT3G48080.1	protein_coding	-	-	14	21	14	244	256	300	18	23	15	169	283	293	133.56	19	248	13.202	3.723	5.69621e-43	6.58656e-42	0.0266	0.0227
AT4G13920.1	protein_coding	RLP50, AtRLP50	receptor like protein 50	64	46	60	1068	866	902	82	49	66	740	958	882	462.78	66	860	13.186	3.721	6.09034e-77	1.53195e-75	0.0184	0.0154
AT2G04190.1	protein_coding	-	-	0	0	2	19	8	11	0	0	2	13	9	11	5.83	1	11	13.176	3.72	5.86877e-05	0.000136933	0.2022	0.2055
AT1G67920.1	protein_coding	-	-	15	6	11	220	150	170	19	6	12	152	166	166	87.04	12	161	13.167	3.719	2.77973e-29	2.18466e-28	0.04	0.03
AT1G05753.1	lncRNA			0	0	0	2	2	1	0	0	0	1	2	1	0.76	0	1	13.158	3.718	0.029465	0.0482222	0.4331	0.3409
AT4G03765.1	lncRNA			0	0	0	2	2	1	0	0	0	1	2	1	0.76	0	1	13.158	3.718	0.0294827	0.0482454	0.4336	0.3409
AT5G07455.1	lncRNA			0	0	0	2	2	1	0	0	0	1	2	1	0.76	0	1	13.157	3.718	0.0294864	0.048246	0.4337	0.3409
AT5G54450.1	protein_coding	-	-	0	0	0	2	2	1	0	0	0	1	2	1	0.76	0	1	13.158	3.718	0.0294819	0.0482454	0.4336	0.3409
AT2G24195.2	protein_coding	-	-	1	0	0	10	7	5	1	0	0	7	8	5	3.47	0	7	13.144	3.716	0.000704822	0.00146588	0.2355	0.2506
AT3G03650.1	protein_coding	EDA5	embryo sac development arrest 5	11	13	10	217	146	209	14	14	11	150	161	204	92.53	13	172	13.12	3.714	7.3943e-35	6.91957e-34	0.0309	0.0287
AT1G35910.1	protein_coding	AtTPPD, TPPD	trehalose-6-phosphate phosphatase D	18	30	16	364	350	318	23	32	17	252	387	311	170.5	24	317	13.111	3.713	3.17311e-53	4.74119e-52	0.0217	0.0201
AT3G56620.1	protein_coding	UMAMIT10	Usually multiple acids move in and out Transporters 10	41	89	41	1099	729	917	52	96	45	762	806	897	442.91	64	822	13.116	3.713	2.78457e-64	5.44286e-63	0.0227	0.0155
AT2G38823.1	protein_coding	-	-	2	0	1	20	12	23	3	0	1	14	13	22	8.88	1	16	13.104	3.712	1.7345e-06	4.65602e-06	0.1446	0.1724
AT3G04040.1	protein_coding	-	-	18	13	23	348	262	285	23	14	25	241	290	279	145.29	21	270	13.089	3.71	3.77572e-45	4.65246e-44	0.026	0.0217
AT3G58380.1	protein_coding	-	-	1	8	1	33	56	54	1	9	1	23	62	53	24.76	4	46	13.08	3.709	1.01768e-11	3.88236e-11	0.089	0.0904
AT5G09735.1	lncRNA			2	2	0	16	23	31	3	2	0	11	25	30	11.92	2	22	13.081	3.709	3.1585e-07	8.96553e-07	0.1392	0.1499
AT4G37050.1	protein_coding	PLP4, PLAIII{beta}, AtPLAIVC, PLA V	patatin-related phospholipase III beta, phospholipase A IVC, PATATIN-like protein 4	8	4	0	89	60	46	10	4	0	62	66	45	31.25	5	58	13.067	3.708	4.11579e-13	1.68752e-12	0.0875	0.0723
AT2G43390.1	protein_coding	-	-	3	4	5	69	60	69	4	4	5	48	66	67	32.54	4	60	13.054	3.706	5.02089e-17	2.51233e-16	0.0546	0.0706
AT3G48346.1	protein_coding	-	-	1	0	1	18	9	12	1	0	1	12	10	12	6.09	1	11	13.033	3.704	1.88731e-05	4.61895e-05	0.1564	0.2031
AT1G59730.1	protein_coding	TH7, ATH7	thioredoxin H-type 7	8	10	4	116	107	138	10	11	4	80	118	135	59.84	8	111	13.001	3.701	2.21922e-22	1.37728e-21	0.0496	0.0413
AT3G05690.2	protein_coding	ATHAP2B, AtNF-YA2, UNE8, HAP2B, NF-YA2	UNFERTILIZED EMBRYO SAC 8, HEME ACTIVATOR PROTEIN (YEAST) HOMOLOG 2B, "nuclear factor Y, subunit A2"	212	212	247	4380	3126	3547	270	228	270	3035	3457	3470	1788.29	256	3321	12.983	3.699	2.2307e-125	1.59987e-123	0.0127	0.0126
AT5G22550.2	protein_coding	-	-	14	20	8	258	185	243	18	21	9	179	205	238	111.53	16	207	12.951	3.695	3.83277e-33	3.40988e-32	0.0364	0.0252
AT1G64590.1	protein_coding	-	-	33	22	19	451	277	518	42	24	21	313	306	507	202.01	29	375	12.94	3.694	1.72233e-38	1.76661e-37	0.0357	0.0188
AT3G01900.1	protein_coding	CYP94B2	"cytochrome P450, family 94, subfamily B, polypeptide 2"	7	0	1	54	25	45	9	0	1	37	28	44	19.85	3	36	12.939	3.694	1.84597e-08	5.73134e-08	0.1467	0.1034
AT1G63840.1	protein_coding	-	-	122	131	114	2105	1712	2180	155	141	125	1459	1893	2133	984.21	140	1828	12.92	3.692	1.4187e-92	5.11371e-91	0.0166	0.0134
AT1G06983.1	lncRNA			0	1	0	4	9	5	0	1	0	3	10	5	3.11	0	6	12.903	3.69	0.00126951	0.00256201	0.2394	0.2644
AT2G03590.1	protein_coding	ATUPS1, UPS1	ureide permease 1	17	22	14	413	245	232	22	24	15	286	271	227	140.78	20	261	12.906	3.69	1.01966e-48	1.3745e-47	0.0224	0.022
AT2G03600.6	protein_coding	ATUPS3, UPS3	ureide permease 3	1	0	1	16	9	13	1	0	1	11	10	13	6.02	1	11	12.907	3.69	2.13392e-05	5.20019e-05	0.1573	0.2051
AT4G13860.1	protein_coding	-	-	44	39	21	591	484	601	56	42	23	410	535	588	275.6	40	511	12.872	3.686	2.19921e-41	2.46254e-40	0.035	0.0172
AT4G30270.1	protein_coding	MERI5B, XTH24, MERI-5, SEN4	xyloglucan endotransglucosylase/hydrolase 24, SENESCENCE 4, MERISTEM 5, meristem-5	2945	3271	2708	52261	42468	50022	3753	3515	2959	36218	46959	48934	23723	3409	44037	12.872	3.686	3.48782e-72	7.97693e-71	0.0242	0.0205
AT4G13310.1	protein_coding	CYP71A20	"cytochrome P450, family 71, subfamily A, polypeptide 20"	1	0	0	10	4	8	1	0	0	7	4	8	3.41	0	6	12.864	3.685	0.000815908	0.00168377	0.2354	0.2507
AT5G09440.1	protein_coding	EXL4	EXORDIUM like 4	331	381	296	6024	4898	5359	422	409	323	4175	5416	5242	2664.64	385	4944	12.841	3.683	1.6293e-105	7.65733e-104	0.0156	0.0126
AT5G64550.1	protein_coding	-	-	170	190	192	4241	2198	2821	217	204	210	2939	2430	2760	1459.97	210	2710	12.846	3.683	2.56874e-135	2.25236e-133	0.0114	0.0127
AT5G09290.1	protein_coding	-	-	3	23	3	125	124	126	4	25	3	87	137	123	63.14	11	116	12.827	3.681	3.20841e-16	1.5417e-15	0.0821	0.0394
AT2G04515.1	protein_coding	-	-	2	5	1	30	55	37	3	5	1	21	61	36	21.14	3	39	12.807	3.679	1.21003e-11	4.58989e-11	0.077	0.1025
AT2G47460.1	protein_coding	PFG1, ATMYB12, MYB12	myb domain protein 12, PRODUCTION OF FLAVONOL GLYCOSIDES 1, MYB DOMAIN PROTEIN 12	17	13	7	293	137	195	22	14	8	203	151	191	98.1	15	182	12.796	3.678	1.59099e-32	1.38591e-31	0.035	0.0273
AT4G14165.1	protein_coding	-	-	0	2	2	18	23	22	0	2	2	12	25	22	10.63	1	20	12.802	3.678	1.57381e-07	4.56981e-07	0.1171	0.159
AT4G28005.1	protein_coding	-	-	0	0	1	8	9	4	0	0	1	6	10	4	3.42	0	7	12.785	3.676	0.00104643	0.00213244	0.2526	0.2537
AT1G01720.1	protein_coding	ATAF1, ANAC2, ANAC002	Arabidopsis NAC domain containing protein 2	367	427	385	7602	5588	5899	468	459	421	5268	6179	5771	3094.2	449	5739	12.768	3.674	1.18527e-135	1.05583e-133	0.0121	0.0128
AT1G12211.1	protein_coding	-	-	2	1	0	22	17	14	3	1	0	15	19	14	8.56	1	16	12.762	3.674	2.16889e-06	5.77166e-06	0.1444	0.1756
AT3G45330.1	protein_coding	LecRK-I.1	L-type lectin receptor kinase I.1	6	0	2	46	43	39	8	0	2	32	48	38	21.23	3	39	12.732	3.67	6.97631e-09	2.2324e-08	0.1379	0.1002
AT5G08250.2	protein_coding	-	-	1	7	1	56	28	60	1	8	1	39	31	59	23.06	3	43	12.697	3.666	1.75051e-09	5.82138e-09	0.1258	0.0923
AT1G65480.2	protein_coding	RSB8, FT	FLOWERING LOCUS T, REDUCED STEM BRANCHING 8	1	4	1	34	28	34	1	4	1	24	31	33	15.74	2	29	12.683	3.665	1.41465e-09	4.73088e-09	0.0972	0.1233
AT1G64020.1	protein_coding	-	-	0	0	1	7	8	5	0	0	1	5	9	5	3.28	0	6	12.648	3.661	0.00108659	0.00221056	0.2499	0.2572
AT2G31945.1	protein_coding	-	-	7	4	4	57	104	84	9	4	4	40	115	82	42.38	6	79	12.612	3.657	6.34418e-15	2.864e-14	0.0757	0.0574
AT5G09640.1	protein_coding	SNG2, SCPL19	serine carboxypeptidase-like 19, SINAPOYLGLUCOSE ACCUMULATOR 2	0	1	1	17	6	15	0	1	1	12	7	15	5.88	1	11	12.586	3.654	3.4485e-05	8.23443e-05	0.1618	0.2053
AT1G57650.3	protein_coding	-	-	0	0	1	6	5	8	0	0	1	4	6	8	3.1	0	6	12.569	3.652	0.00115418	0.0023416	0.24	0.2609
AT3G08870.2	protein_coding	LecRK-VI.1	L-type lectin receptor kinase VI.1	31	44	43	744	542	580	40	47	47	516	599	567	302.68	45	561	12.542	3.649	1.09106e-83	3.21243e-82	0.0139	0.0168
AT5G38740.1	protein_coding	AGL77	AGAMOUS-like 77	0	2	0	5	12	13	0	2	0	3	13	13	5.27	1	10	12.527	3.647	0.000186834	0.000414329	0.2163	0.2229
AT1G78340.1	protein_coding	ATGSTU22, GSTU22	glutathione S-transferase TAU 22	11	16	12	229	173	214	14	17	13	159	191	209	100.61	15	186	12.519	3.646	4.44916e-37	4.42559e-36	0.0282	0.027
AT5G49140.1	protein_coding	-	-	2	0	0	10	11	15	3	0	0	7	12	15	6.05	1	11	12.475	3.641	0.000176976	0.000393342	0.252	0.2087
AT3G21080.1	protein_coding	-	-	3	11	4	81	73	119	4	12	4	56	81	116	45.55	7	84	12.462	3.64	1.76664e-17	9.03379e-17	0.0618	0.0528
AT4G16190.1	protein_coding	-	-	3463	3772	3847	72517	49232	54472	4413	4054	4204	50256	54438	53287	28441.9	4224	52660	12.469	3.64	2.36199e-89	7.94078e-88	0.0192	0.0215
AT5G39190.1	protein_coding	GER2, ATGER2, GLP2A	germin-like protein 2, A. THALIANA GERMIN LIKE PROTEIN 2, GERMIN-LIKE PROTEIN 2A	17	27	18	250	325	376	22	29	20	173	359	368	161.8	24	300	12.47	3.64	3.33277e-44	4.00261e-43	0.0263	0.0207
AT2G02850.1	protein_coding	ARPN	plantacyanin	22	27	28	449	323	440	28	29	31	311	357	430	197.73	29	366	12.457	3.639	5.21184e-60	9.22661e-59	0.0187	0.019
AT1G62370.1	protein_coding	-	-	65	54	60	1060	802	964	83	58	66	735	887	943	461.81	69	855	12.441	3.637	1.40959e-84	4.2259e-83	0.0157	0.0154
AT1G61550.1	protein_coding	-	-	6	4	7	115	66	94	8	4	8	80	73	92	44.04	7	82	12.405	3.633	9.21851e-21	5.36742e-20	0.0452	0.0536
AT3G62090.2	protein_coding	PIL2, PIF6	PHYTOCHROME-INTERACTING FACTOR 6, phytochrome interacting factor 3-like 2	22	32	24	571	329	352	28	34	26	396	364	344	198.75	29	368	12.379	3.63	2.1224e-59	3.67362e-58	0.019	0.0189
AT3G57260.2	protein_coding	AtBG2, PR-2, AtPR2, BG2, PR2, BGL2	"beta-1,3-glucanase 2", PATHOGENESIS-RELATED PROTEIN 2, BETA-1,3-GLUCANASE 2	76	33	20	553	636	587	97	35	22	383	703	574	302.48	51	553	12.367	3.628	2.58505e-18	1.37022e-17	0.086	0.0168
AT4G31370.1	protein_coding	FLA5	FASCICLIN-like arabinogalactan protein 5 precursor	1	0	3	23	27	16	1	0	3	16	30	16	11	1	21	12.362	3.628	1.28839e-06	3.49236e-06	0.1567	0.1554
AT2G39820.1	protein_coding	eIF6B	eukaryotic initiation factor 6B	3	6	1	73	37	53	4	6	1	51	41	52	25.79	4	48	12.358	3.627	1.56144e-12	6.21533e-12	0.0805	0.0841
AT3G56260.2	protein_coding	-	-	71	74	58	1392	838	997	90	80	63	965	927	975	516.67	78	956	12.341	3.625	3.29099e-100	1.40538e-98	0.013	0.0151
AT5G13930.1	protein_coding	ATCHS, CHS, TT4	TRANSPARENT TESTA 4, CHALCONE SYNTHASE	2166	2049	1572	51020	20017	25544	2760	2202	1718	35358	22134	24989	14860	2227	27494	12.326	3.624	9.41765e-90	3.18912e-88	0.0188	0.0181
AT5G39720.2	protein_coding	AIG2L	avirulence induced gene 2 like protein	0	1	0	6	5	8	0	1	0	4	6	8	3.1	0	6	12.282	3.619	0.00134144	0.00270113	0.2497	0.261
AT5G66170.3	protein_coding	STR18	sulfurtransferase 18	119	112	94	1691	1465	1892	152	120	103	1172	1620	1851	836.23	125	1548	12.285	3.619	2.72682e-65	5.47536e-64	0.0234	0.0138
at1g66795	miRNA	MIR157B	MIR157B; miRNA	2	1	7	53	42	54	3	1	8	37	46	53	24.54	4	45	12.273	3.617	4.05821e-12	1.58161e-11	0.0825	0.089
AT1G27730.1	protein_coding	ZAT10, STZ	salt tolerance zinc finger	93	105	93	1251	1597	1622	119	113	102	867	1766	1587	758.76	111	1407	12.195	3.608	5.73103e-64	1.11167e-62	0.0234	0.014
AT3G21780.1	protein_coding	UGT71B6	UDP-glucosyl transferase 71B6	20	14	18	236	294	272	25	15	20	164	325	266	135.82	20	252	12.193	3.608	4.29132e-32	3.6865e-31	0.0386	0.0226
AT3G22160.1	protein_coding	JAV1	jasmonate-associated VQ motif gene 1	102	93	55	1232	1264	1264	130	100	60	854	1398	1237	629.67	97	1163	12.197	3.608	7.55919e-46	9.49857e-45	0.0334	0.0145
AT1G10155.1	protein_coding	PP2-A10, ATPP2-A10	phloem protein 2-A10	2	1	0	14	18	18	3	1	0	10	20	18	8.47	1	16	12.183	3.607	7.28439e-06	1.85161e-05	0.1653	0.1797
AT5G38100.1	protein_coding	-	-	23	13	7	237	190	222	29	14	8	164	210	217	107.07	17	197	12.173	3.606	4.65037e-23	2.9684e-22	0.0573	0.026
AT2G37750.1	protein_coding	-	-	52	28	36	533	564	664	66	30	39	369	624	650	296.38	45	548	12.149	3.603	9.35257e-33	8.21094e-32	0.0447	0.0169
AT4G15075.1	protein_coding	-	-	0	1	0	5	1	18	0	1	0	3	1	18	3.88	0	7	12.152	3.603	0.00287619	0.00553301	0.2777	0.2436
AT5G62150.1	protein_coding	-	-	11	15	18	182	202	273	14	16	20	126	223	267	111.06	17	205	12.155	3.603	3.69232e-38	3.76652e-37	0.0271	0.0255
AT1G49000.1	protein_coding	-	-	12	9	13	183	140	201	15	10	14	127	155	197	86.24	13	160	12.133	3.601	2.3464e-31	1.96972e-30	0.033	0.0303
AT3G25950.1	protein_coding	-	-	3	1	2	42	35	22	4	1	2	29	39	22	16.07	2	30	12.133	3.601	1.61064e-09	5.36964e-09	0.0938	0.1212
AT4G09020.1	protein_coding	ATISA3, ISA3	isoamylase 3	1583	2008	1841	41491	20736	24187	2017	2158	2012	28754	22929	23661	13588.5	2062	25115	12.119	3.599	4.36326e-96	1.69272e-94	0.0174	0.0177
AT4G14365.1	protein_coding	XBAT34	XB3 ortholog 4 in Arabidopsis thaliana	122	74	91	1276	1507	1531	155	80	99	884	1666	1498	730.46	111	1349	12.09	3.596	1.1664e-35	1.1154e-34	0.044	0.0141
AT4G25380.1	protein_coding	AtSAP10, SAP10	stress-associated protein 10, Arabidopsis thaliana stress-associated protein 10	3	0	0	16	10	23	4	0	0	11	11	22	8.08	1	15	12.094	3.596	7.63677e-05	0.000176463	0.2464	0.1818
AT5G57050.3	protein_coding	ABI2, AtABI2	ABA INSENSITIVE 2	123	115	138	2574	1552	1733	157	124	151	1784	1716	1695	937.73	144	1732	12.085	3.595	1.97087e-119	1.22778e-117	0.0118	0.0135
AT2G47130.1	protein_coding	SDR3, AtSDR3	short-chain dehydrogenase/reductase 2	29	32	15	378	326	451	37	34	16	262	360	441	191.89	29	354	12.068	3.593	7.99476e-34	7.2628e-33	0.0397	0.0192
AT2G01379.1	protein_coding	-	-	1	0	0	2	19	2	1	0	0	1	21	2	4.27	0	8	12.057	3.592	0.00427501	0.00801934	0.2967	0.2457
AT5G66400.1	protein_coding	RAB18, ATDI8	RESPONSIVE TO ABA 18, ARABIDOPSIS THALIANA DROUGHT-INDUCED 8	45	30	48	1076	436	498	57	32	52	746	482	487	309.5	47	572	12.024	3.588	1.61531e-73	3.80638e-72	0.0162	0.0167
AT4G11040.2	protein_coding	RDO5, DOG18	REDUCED DORMANCY 5, DELAY OF GERMINATION 18	2	8	2	83	34	74	3	9	2	58	38	72	30.14	5	56	12.015	3.587	1.5977e-11	6.01876e-11	0.0985	0.0738
AT5G50270.2	protein_coding	-	-	1	0	0	12	7	2	1	0	0	8	8	2	3.21	0	6	12.017	3.587	0.00153297	0.00306407	0.2367	0.2543
AT4G08555.1	protein_coding	-	-	29	75	63	687	787	905	37	81	69	476	870	885	403.01	62	744	12.011	3.586	4.56379e-94	1.70205e-92	0.0125	0.0158
AT5G01550.1	protein_coding	LecRK-VI.3, LECRKA4.2	lectin receptor kinase a4.1, L-type lectin receptor kinase VI.3	17	5	10	188	138	157	22	5	11	130	153	154	79.07	13	146	11.991	3.584	4.7149e-22	2.89555e-21	0.055	0.0324
AT1G08443.1	lncRNA			0	0	1	5	7	6	0	0	1	3	8	6	3.03	0	6	11.986	3.583	0.0016086	0.00320562	0.2519	0.2646
AT1G75600.1	protein_coding	HTR14		0	1	0	6	6	6	0	1	0	4	7	6	2.96	0	6	11.985	3.583	0.0015445	0.00308448	0.2468	0.2648
AT5G22460.1	protein_coding	-	-	88	87	77	1509	1066	1268	112	93	84	1046	1179	1240	625.78	96	1155	11.981	3.583	2.633e-96	1.02431e-94	0.014	0.0145
AT3G07600.1	protein_coding	-	-	9	11	2	99	102	126	11	12	2	69	113	123	55.02	8	102	11.97	3.581	1.40087e-16	6.8503e-16	0.072	0.0447
AT4G14640.2	protein_coding	CAM8, CML8, AtCML8	calmodulin 8, calmodulin-like 8	16	7	8	172	129	171	20	8	9	119	143	167	77.63	12	143	11.967	3.581	1.64908e-22	1.028e-21	0.0526	0.0329
AT5G49350.1	protein_coding	-	-	2	1	1	35	14	20	3	1	1	24	15	20	10.67	2	20	11.967	3.581	1.36254e-07	3.97327e-07	0.107	0.1531
AT5G51585.1	protein_coding	-	-	28	25	25	389	350	441	36	27	27	270	387	431	196.31	30	363	11.964	3.581	9.04371e-48	1.19041e-46	0.0251	0.019
AT1G05783.1	protein_coding	-	-	5	8	6	139	67	95	6	9	7	96	74	93	47.48	7	88	11.908	3.574	3.88439e-21	2.29996e-20	0.0446	0.0497
AT4G16820.1	protein_coding	PLA-I{beta]2, DALL1	phospholipase A I beta 2, DAD1-Like Lipase 1	2	0	3	13	41	26	3	0	3	9	45	25	14.27	2	26	11.89	3.572	8.06211e-07	2.21714e-06	0.152	0.1369
AT4G19970.1	protein_coding	-	-	8	21	12	180	229	172	10	23	13	125	253	168	98.68	15	182	11.882	3.571	6.73415e-36	6.49744e-35	0.0276	0.0276
AT1G56710.1	protein_coding	-	-	10	4	8	145	82	112	13	4	9	100	91	110	54.42	9	100	11.85	3.567	5.76584e-22	3.52363e-21	0.0456	0.0444
AT3G27410.1	protein_coding	-	-	0	0	1	6	4	8	0	0	1	4	4	8	2.92	0	5	11.823	3.564	0.00169274	0.00336347	0.2416	0.2648
AT5G22530.1	protein_coding	-	-	3	3	3	26	60	48	4	3	3	18	66	47	23.61	3	44	11.831	3.564	1.23083e-11	4.66625e-11	0.076	0.0949
AT3G26840.1	protein_coding	PES2	phytyl ester synthase 2	224	239	232	4481	2833	3224	285	257	254	3105	3133	3154	1697.95	265	3131	11.815	3.563	6.22755e-130	4.85211e-128	0.0114	0.0126
AT5G61750.1	protein_coding	-	-	1	0	0	9	4	7	1	0	0	6	4	7	3.13	0	6	11.794	3.56	0.00143357	0.00287794	0.2452	0.2576
AT2G44578.1	protein_coding	-	-	4	2	7	54	73	64	5	2	8	37	81	63	32.61	5	60	11.774	3.558	9.32802e-14	3.95684e-13	0.0735	0.0716
AT1G54540.1	protein_coding	NHL11		23	20	12	263	243	312	29	21	13	182	269	305	136.68	21	252	11.747	3.554	6.71809e-30	5.38892e-29	0.0419	0.0224
AT5G66640.4	protein_coding	DAR3	DA1-related protein 3	25	17	25	418	296	294	32	18	27	290	327	288	163.67	26	302	11.734	3.553	1.25463e-45	1.56597e-44	0.0248	0.0205
AT2G30250.1	protein_coding	WRKY25, ATWRKY25	WRKY DNA-binding protein 25	179	198	219	3121	2792	2863	228	213	239	2163	3087	2801	1455.18	227	2684	11.731	3.552	1.63161e-105	7.65733e-104	0.0141	0.0127
AT5G66690.1	protein_coding	UGT72E2		239	170	120	3044	2044	2598	305	183	131	2110	2260	2542	1254.93	206	2304	11.731	3.552	1.96972e-51	2.82974e-50	0.0303	0.0129
AT4G21490.2	protein_coding	NDB3	NAD(P)H dehydrogenase B3	9	9	7	143	106	125	11	10	8	99	117	122	61.23	10	113	11.685	3.547	6.29558e-25	4.2617e-24	0.0388	0.0402
AT1G23060.5	protein_coding	MDP40	MICROTUBULE DESTABILIZING PROTEIN 40	22	33	25	460	360	354	28	35	27	319	398	346	192.33	30	354	11.683	3.546	4.59558e-58	7.74821e-57	0.0185	0.0192
AT1G13830.1	protein_coding	-	-	24	23	24	366	324	354	31	25	26	254	358	346	173.29	27	319	11.673	3.545	7.07095e-49	9.60104e-48	0.0227	0.02
AT1G66690.1	protein_coding	-	-	2	1	1	15	25	22	3	1	1	10	28	22	10.71	2	20	11.621	3.539	7.54328e-07	2.0767e-06	0.1293	0.1599
AT3G50970.1	protein_coding	LTI30, XERO2	LOW TEMPERATURE-INDUCED 30	82	91	84	1653	1082	1099	104	98	92	1146	1196	1075	618.53	98	1139	11.618	3.538	9.66699e-113	5.18993e-111	0.0112	0.0146
AT2G36770.1	protein_coding	-	-	41	26	25	454	441	444	52	28	27	315	488	434	224.02	36	412	11.597	3.536	1.1532e-35	1.10353e-34	0.0375	0.0182
AT1G01310.1	protein_coding	-	-	0	0	1	8	7	4	0	0	1	6	8	4	3.05	0	6	11.56	3.531	0.00184293	0.00364352	0.2594	0.2611
AT5G63130.2	protein_coding	-	-	48	34	59	717	595	727	61	37	64	497	658	711	338.03	54	622	11.56	3.531	7.55961e-62	1.40405e-60	0.0205	0.0164
AT1G55240.1	protein_coding	-	-	13	11	8	194	121	163	17	12	9	134	134	159	77.47	13	142	11.532	3.528	1.25995e-27	9.35302e-27	0.0371	0.0328
AT3G26470.1	protein_coding	-	-	52	51	33	684	565	732	66	55	36	474	625	716	328.66	52	605	11.538	3.528	3.57742e-49	4.88594e-48	0.0271	0.0165
AT5G52390.1	protein_coding	-	-	15	6	2	201	71	77	19	6	2	139	79	75	53.48	9	98	11.525	3.527	2.01955e-19	1.11726e-18	0.0531	0.0442
AT1G24430.1	protein_coding	-	-	27	21	19	321	306	349	34	23	21	222	338	341	163.33	26	300	11.516	3.526	5.9935e-37	5.93851e-36	0.0327	0.0205
AT4G33550.2	protein_coding	-	-	29	42	24	558	343	494	37	45	26	387	379	483	226.26	36	416	11.506	3.524	2.04467e-49	2.81039e-48	0.0245	0.0181
AT3G01990.2	protein_coding	ACR6	ACT domain repeat 6	20	33	18	397	280	347	25	35	20	275	310	339	167.47	27	308	11.486	3.522	3.06461e-45	3.78791e-44	0.0249	0.0203
AT4G19925.1	protein_coding	-	-	0	0	1	11	4	5	0	0	1	8	4	5	3.01	0	6	11.486	3.522	0.0017708	0.00350936	0.2478	0.2579
AT1G70380.1	protein_coding	-	-	0	0	1	7	5	6	0	0	1	5	6	6	2.89	0	6	11.482	3.521	0.00185252	0.00366093	0.2493	0.2649
AT4G15270.3	protein_coding	-	-	2	10	6	78	91	75	3	11	7	54	101	73	41.32	7	76	11.483	3.521	1.89738e-18	1.01204e-17	0.0497	0.0578
AT2G45760.1	protein_coding	BAP2, BAL	BON ASSOCIATION PROTEIN 1-LIKE, BON association protein 2	7	1	3	29	76	64	9	1	3	20	84	63	30	4	56	11.468	3.52	1.61513e-07	4.68487e-07	0.1736	0.0785
AT2G21100.2	protein_coding	-	-	37	32	15	416	357	421	47	34	16	288	395	412	198.8	32	365	11.459	3.518	7.0113e-31	5.79188e-30	0.0435	0.0189
AT2G38790.1	protein_coding	-	-	44	45	56	680	645	749	56	48	61	471	713	733	347.13	55	639	11.455	3.518	1.08328e-72	2.50416e-71	0.0165	0.0163
AT3G52780.1	protein_coding	ATPAP20, PAP20		15	17	14	256	201	211	19	18	15	177	222	206	109.79	17	202	11.459	3.518	6.14343e-38	6.23279e-37	0.0266	0.0255
AT3G55890.2	protein_coding	-	-	18	31	26	332	311	414	23	33	28	230	344	405	177.27	28	326	11.433	3.515	3.57179e-51	5.11292e-50	0.0209	0.0198
AT3G03440.1	protein_coding	-	-	86	109	79	1842	1084	1115	110	117	86	1277	1199	1091	646.5	104	1189	11.414	3.513	1.01826e-109	5.13183e-108	0.0116	0.0144
AT5G67340.1	protein_coding	-	-	54	56	31	860	590	589	69	60	34	596	652	576	331.24	54	608	11.42	3.513	1.10695e-66	2.27833e-65	0.0184	0.0165
AT3G11080.1	protein_coding	RLP35, AtRLP35	receptor like protein 35	27	47	35	771	398	453	34	51	38	534	440	443	256.79	41	472	11.409	3.512	1.94441e-60	3.48859e-59	0.0193	0.0174
AT3G13784.1	protein_coding	CWINV5, AtcwINV5	cell wall invertase 5	7	7	11	206	74	112	9	8	12	143	82	110	60.44	10	112	11.409	3.512	2.32838e-24	1.55249e-23	0.0386	0.0398
AT5G03550.1	protein_coding	-	-	4	0	0	16	17	21	5	0	0	11	19	21	9.25	2	17	11.392	3.51	0.000177072	0.000393492	0.2978	0.1718
AT5G48657.1	protein_coding	-	-	61	54	41	756	681	802	78	58	45	524	753	785	373.68	60	687	11.395	3.51	1.26666e-51	1.83005e-50	0.0259	0.0161
AT1G76650.1	protein_coding	CML38	calmodulin-like 38	67	36	54	785	691	753	85	39	59	544	764	737	371.3	61	682	11.371	3.507	1.57151e-43	1.84692e-42	0.0318	0.0161
AT1G19160.1	protein_coding	-	-	0	0	1	6	8	4	0	0	1	4	9	4	3	0	6	11.363	3.506	0.00225348	0.00440567	0.2656	0.2647
AT3G23630.1	protein_coding	ATIPT7, IPT7	ARABIDOPSIS THALIANA ISOPENTENYLTRANSFERASE 7, isopentenyltransferase 7	2	5	2	81	33	30	3	5	2	56	36	29	22.01	3	40	11.36	3.506	1.25204e-11	4.74536e-11	0.0745	0.0935
AT5G46130.1	protein_coding	-	-	1	2	2	24	24	25	1	2	2	17	27	24	12.21	2	23	11.361	3.506	3.3492e-08	1.02093e-07	0.0969	0.1459
AT5G54560.1	protein_coding	-	-	0	0	1	2	7	7	0	0	1	1	8	7	2.84	0	5	11.359	3.506	0.00294422	0.00565376	0.2618	0.2724
AT1G17745.1	protein_coding	PGDH2, PGDH	phosphoglycerate dehydrogenase 2, 3-phosphoglycerate dehydrogenase	581	644	452	10296	6232	7712	740	692	494	7135	6891	7544	3916.16	642	7190	11.335	3.503	2.52372e-92	9.06173e-91	0.0168	0.0132
AT3G09135.1	lncRNA			0	1	0	2	6	8	0	1	0	1	7	8	2.82	0	5	11.334	3.503	0.00303689	0.00582333	0.2628	0.2724
AT3G28540.1	protein_coding	-	-	14	19	8	265	137	202	18	20	9	184	151	198	96.62	16	178	11.32	3.501	1.54164e-28	1.17882e-27	0.0387	0.0277
AT1G11210.1	protein_coding	-	-	215	249	262	4483	2873	3151	274	268	286	3107	3177	3082	1698.99	276	3122	11.311	3.5	1.98517e-128	1.48072e-126	0.0112	0.0126
AT2G26310.2	protein_coding	AtFAP2, FAP2	fatty-acid-binding protein 2	25	28	29	418	343	405	32	30	32	290	379	396	193.13	31	355	11.309	3.499	5.11469e-55	8.10097e-54	0.0195	0.0191
AT2G32160.3	protein_coding	-	-	30	56	41	586	562	607	38	60	45	406	621	594	294.09	48	540	11.302	3.499	3.68143e-74	8.80114e-73	0.015	0.0169
AT3G63010.1	protein_coding	ATGID1B, GID1B	GA INSENSITIVE DWARF1B	143	172	112	2710	1605	1864	182	185	122	1878	1775	1823	994.29	163	1825	11.307	3.499	1.48756e-97	5.96967e-96	0.0144	0.0134
AT5G19880.1	protein_coding	-	-	0	3	0	15	11	15	0	3	0	10	12	15	6.74	1	12	11.308	3.499	9.32548e-05	0.000213788	0.2246	0.1966
AT5G64530.2	protein_coding	ANAC104, XND1	Arabidopsis NAC domain containing protein 104, xylem NAC domain 1	14	35	18	352	265	308	18	38	20	244	293	301	152.23	25	279	11.295	3.498	6.1908e-41	6.8498e-40	0.0274	0.0212
AT1G10110.1	protein_coding	-	-	5	12	16	193	129	143	6	13	17	134	143	140	75.51	12	139	11.284	3.496	1.49922e-26	1.07086e-25	0.0386	0.0335
AT5G23750.1	protein_coding	-	-	130	127	149	2607	1636	1645	166	136	163	1807	1809	1609	948.31	155	1742	11.24	3.491	8.07396e-110	4.07647e-108	0.0124	0.0135
AT5G25910.1	protein_coding	AtRLP52, RLP52	receptor like protein 52	15	19	7	233	178	166	19	20	8	161	197	162	94.64	16	173	11.237	3.49	2.01598e-30	1.64543e-29	0.0346	0.0282
AT5G67520.2	protein_coding	APK4	adenosine-5'-phosphosulfate (APS) kinase 4	20	57	39	692	468	447	25	61	43	480	517	437	260.62	43	478	11.234	3.49	1.81232e-53	2.73422e-52	0.0227	0.0174
AT2G28085.1	protein_coding	SAUR42	SMALL AUXIN UPREGULATED RNA 42	1	0	3	25	12	22	1	0	3	17	13	22	9.44	1	17	11.227	3.489	1.72403e-06	4.62836e-06	0.1343	0.1655
AT3G03530.1	protein_coding	AtNPC4, NPC4	non-specific phospholipase C4	25	31	25	508	300	366	32	33	27	352	332	358	189.05	31	347	11.227	3.489	1.08638e-55	1.74439e-54	0.019	0.0193
AT1G02850.3	protein_coding	BGLU11	beta glucosidase 11	593	921	572	12208	8215	8830	756	990	625	8460	9084	8638	4758.76	790	8727	11.223	3.488	1.53177e-99	6.46233e-98	0.0156	0.0137
AT2G15490.1	protein_coding	UGT73B4	UDP-glycosyltransferase 73B4	37	40	28	667	429	418	47	43	31	462	474	409	244.38	40	448	11.206	3.486	1.4111e-64	2.77958e-63	0.017	0.0177
AT4G23140.1	protein_coding	CRK6	cysteine-rich RLK (RECEPTOR-like protein kinase) 6	23	17	15	274	285	222	29	18	16	190	315	217	131.03	21	241	11.203	3.486	9.60214e-33	8.42741e-32	0.0351	0.023
AT5G56840.1	protein_coding	-	-	22	23	34	432	362	320	28	25	37	299	400	313	183.77	30	337	11.19	3.484	2.50207e-47	3.24457e-46	0.0237	0.0195
AT3G09960.1	protein_coding	-	-	6	1	9	74	66	80	8	1	10	51	73	78	36.85	6	67	11.177	3.482	7.90278e-14	3.36759e-13	0.0766	0.0637
AT4G22980.1	protein_coding	-	-	23	28	24	342	374	326	29	30	26	237	414	319	175.85	28	323	11.156	3.48	1.4484e-48	1.94588e-47	0.0221	0.0199
AT2G22860.1	protein_coding	PSK2, ATPSK2	phytosulfokine 2 precursor	4	4	7	87	57	71	5	4	8	60	63	69	34.97	6	64	11.147	3.479	1.10524e-16	5.42936e-16	0.0527	0.0658
AT2G36790.1	protein_coding	UGT73C6	UDP-glucosyl transferase 73C6	32	60	49	447	774	688	41	64	54	310	856	673	332.91	53	613	11.151	3.479	2.56613e-68	5.51708e-67	0.0168	0.0165
AT4G16740.4	protein_coding	TPS03, ATTPS03	terpene synthase 03	3	6	7	110	49	78	4	6	8	76	54	76	37.44	6	69	11.137	3.477	6.60661e-17	3.28522e-16	0.0536	0.0612
AT1G77530.1	protein_coding	-	-	7	35	18	306	191	288	9	38	20	212	211	282	128.53	22	235	11.123	3.476	2.6272e-25	1.80377e-24	0.0497	0.0231
AT1G14520.3	protein_coding	MIOX1	myo-inositol oxygenase 1	293	345	250	6234	3169	3529	373	371	273	4320	3504	3452	2048.99	339	3759	11.118	3.475	6.31605e-117	3.783e-115	0.0125	0.0125
AT3G48343.1	protein_coding	-	-	1	1	0	29	4	7	1	1	0	20	4	7	5.62	1	10	11.118	3.475	0.000130103	0.000293287	0.1618	0.2024
AT1G29230.1	protein_coding	WL1, ATWL1, ATCIPK18, CIPK18, SnRK3.20	CBL-interacting protein kinase 18, WPL4-LIKE 1, SNF1-RELATED PROTEIN KINASE 3.20	11	5	3	132	69	74	14	5	3	91	76	72	43.81	7	80	11.11	3.474	1.97736e-17	1.00928e-16	0.0565	0.0536
AT3G12230.1	protein_coding	scpl14	serine carboxypeptidase-like 14	1	0	0	7	3	9	1	0	0	5	3	9	3.04	0	6	11.095	3.472	0.00234544	0.00457428	0.259	0.2611
AT3G50260.1	protein_coding	DEAR1, ATERF#011, CEJ1	cooperatively regulated by ethylene and jasmonate 1, DREB AND EAR MOTIF PROTEIN 1	22	25	14	309	269	269	28	27	15	214	297	263	140.82	23	258	11.079	3.47	4.67987e-39	4.90264e-38	0.0279	0.0221
AT4G18425.1	protein_coding	-	-	39	19	23	411	317	394	50	20	25	285	351	385	186.01	32	340	11.052	3.466	3.86734e-32	3.32739e-31	0.0397	0.0194
AT5G62480.2	protein_coding	GST14, GSTU9, ATGSTU9, GST14B	GLUTATHIONE S-TRANSFERASE 14B, GLUTATHIONE S-TRANSFERASE 14, glutathione S-transferase tau 9	34	27	31	377	428	477	43	29	34	261	473	467	217.9	35	400	11.03	3.463	1.22491e-38	1.26335e-37	0.0322	0.0184
AT3G22370.1	protein_coding	ATAOX1A, AOX1A, HSR3, AtHSR3	hyper-sensitivity-related 3, alternative oxidase 1A	545	692	691	10302	7555	8945	694	744	755	7139	8354	8750	4406.19	731	8081	11.022	3.462	7.88113e-125	5.58084e-123	0.0121	0.0135
AT4G28556.1	protein_coding	RIC7		4	0	2	38	28	22	5	0	2	26	31	22	14.35	2	26	11.022	3.462	1.06149e-07	3.11881e-07	0.1272	0.1305
AT4G04760.2	protein_coding	-	-	4	8	11	152	83	94	5	9	12	105	92	92	52.46	9	96	11.01	3.461	1.35125e-20	7.81711e-20	0.0469	0.0456
AT5G51465.1	protein_coding	-	-	3	8	0	24	73	39	4	9	0	17	81	38	24.65	4	45	11.015	3.461	3.16152e-10	1.10608e-09	0.0915	0.0925
AT1G14870.1	protein_coding	AtPCR2, PCR2	PLANT CADMIUM RESISTANCE 2	127	112	102	1362	1501	1888	162	120	111	944	1660	1847	807.37	131	1484	11.002	3.46	7.91003e-44	9.3711e-43	0.0333	0.0139
AT1G44414.1	protein_coding	-	-	1	4	5	38	58	37	1	4	5	26	64	36	22.95	3	42	11.004	3.46	1.23292e-11	4.67354e-11	0.0734	0.0957
AT1G60450.1	protein_coding	AtGolS7, GolS7	galactinol synthase 7	4	3	5	53	47	68	5	3	5	37	52	67	28.17	4	52	11.006	3.46	6.31708e-14	2.70921e-13	0.0614	0.0801
AT2G05910.1	protein_coding	-	-	10	7	6	124	88	114	13	8	7	86	97	112	53.6	9	98	10.987	3.458	1.43808e-20	8.30569e-20	0.0473	0.0453
AT5G16360.1	protein_coding	-	-	45	47	39	589	565	656	57	51	43	408	625	642	304.19	50	558	10.982	3.457	4.12605e-57	6.81285e-56	0.0212	0.0168
AT1G72120.1	protein_coding	NPF5.14, AtNPF5.14	NRT1/ PTR family 5.14	45	61	39	696	610	677	57	66	43	482	675	662	330.77	55	606	10.972	3.456	7.71647e-67	1.59525e-65	0.0177	0.0165
AT3G28210.2	protein_coding	SAP12, PMZ	STRESS-ASSOCIATED PROTEIN 12	21	21	18	210	313	309	27	23	20	146	346	302	143.82	23	265	10.971	3.456	7.26461e-31	5.99424e-30	0.0379	0.0219
AT5G05530.1	protein_coding	-	-	1	0	1	8	16	8	1	0	1	6	18	8	5.57	1	11	10.972	3.456	0.000204405	0.000451433	0.1973	0.2179
AT5G46960.1	protein_coding	-	-	2	5	6	44	82	47	3	5	7	30	91	46	30.27	5	56	10.947	3.452	1.27538e-13	5.37334e-13	0.0641	0.077
AT1G09207.1	lncRNA			0	1	0	7	5	5	0	1	0	5	6	5	2.72	0	5	10.905	3.447	0.00255337	0.00495287	0.2535	0.2689
AT1G62840.1	protein_coding	-	-	15	23	20	305	231	258	19	25	22	211	255	252	130.81	22	239	10.897	3.446	4.58782e-43	5.32031e-42	0.0229	0.0229
AT1G67856.1	protein_coding	-	-	1	4	7	47	54	54	1	4	8	33	60	53	26.39	4	49	10.902	3.446	1.03891e-12	4.17578e-12	0.0702	0.0849
AT1G60730.2	protein_coding	-	-	424	534	402	6512	5763	6263	540	574	439	4513	6372	6127	3094.27	518	5671	10.893	3.445	4.86507e-92	1.73131e-90	0.0163	0.0128
AT3G61890.1	protein_coding	ATHB-12, ATHB12, HB-12	ARABIDOPSIS THALIANA HOMEOBOX 12, homeobox 12	130	140	147	2553	1635	1653	166	150	161	1769	1808	1617	945.16	159	1731	10.883	3.444	7.77672e-115	4.40329e-113	0.0114	0.0135
AT5G23230.1	protein_coding	NIC2	nicotinamidase 2	15	36	21	331	309	307	19	39	23	229	342	300	158.69	27	290	10.877	3.443	2.34451e-46	2.98219e-45	0.0223	0.0208
AT5G37980.1	protein_coding	-	-	4	9	8	170	64	82	5	10	9	118	71	80	48.72	8	90	10.859	3.441	9.06765e-19	4.88692e-18	0.0512	0.0481
AT4G25800.1	protein_coding	-	-	27	30	25	476	300	367	34	32	27	330	332	359	185.76	31	340	10.85	3.44	1.69312e-53	2.55713e-52	0.0194	0.0194
AT5G59510.1	protein_coding	DVL18, RTFL5	ROTUNDIFOLIA like 5, DEVIL 18	5	4	2	42	60	50	6	4	2	29	66	49	26.2	4	48	10.852	3.44	1.09315e-11	4.16178e-11	0.0799	0.0862
AT4G18880.1	protein_coding	AT-HSFA4A, HSF A4A	heat shock transcription factor A4A, ARABIDOPSIS THALIANA HEAT SHOCK TRANSCRIPTION FACTOR A4A	242	253	235	3964	2920	3159	308	272	257	2747	3229	3090	1650.55	279	3022	10.835	3.438	3.47974e-108	1.71058e-106	0.0131	0.0126
AT2G18690.1	protein_coding	-	-	101	88	68	900	1276	1328	129	95	74	624	1411	1299	605.23	99	1111	10.814	3.435	1.68879e-31	1.42324e-30	0.0459	0.0146
AT3G63050.1	protein_coding	-	-	10	6	4	92	79	106	13	6	4	64	87	104	46.39	8	85	10.786	3.431	6.85997e-16	3.24013e-15	0.0659	0.0519
AT5G09520.1	protein_coding	PELPK2	Pro-Glu-Leu	21	27	8	246	210	291	27	29	9	170	232	285	125.31	22	229	10.787	3.431	1.74492e-22	1.08629e-21	0.0562	0.0236
AT1G03106.1	protein_coding	-	-	1	0	0	3	6	9	1	0	0	2	7	9	3.13	0	6	10.764	3.428	0.0033281	0.00634432	0.2894	0.2643
AT1G56320.1	protein_coding	-	-	19	8	11	197	136	187	24	9	12	137	150	183	85.78	15	157	10.761	3.428	1.73927e-23	1.12406e-22	0.0473	0.0304
AT1G67520.2	protein_coding	-	-	34	52	43	605	556	558	43	56	47	419	615	546	287.69	49	527	10.76	3.428	9.96439e-73	2.30533e-71	0.0147	0.017
AT2G21187.1	lncRNA		other RNA	19	19	12	243	196	243	24	20	13	168	217	238	113.43	19	208	10.758	3.427	1.13353e-31	9.60207e-31	0.0339	0.025
AT1G52565.1	protein_coding	-	-	17	16	17	184	247	244	22	17	19	128	273	239	116.13	19	213	10.745	3.426	3.53649e-30	2.86639e-29	0.0359	0.0248
AT1G71390.2	protein_coding	RLP11, AtRLP11	receptor like protein 11	0	0	2	16	7	8	0	0	2	11	8	8	4.81	1	9	10.744	3.426	0.000442457	0.000941139	0.2367	0.2217
AT1G15630.1	protein_coding	-	-	0	4	4	28	35	37	0	4	4	19	39	36	17.16	3	31	10.734	3.424	1.50165e-09	5.01224e-09	0.0885	0.1178
AT1G77730.1	protein_coding	-	-	1	0	3	28	11	19	1	0	3	19	12	19	9.12	1	17	10.715	3.422	3.38961e-06	8.86744e-06	0.1387	0.1673
AT2G46495.1	protein_coding	-	-	0	0	1	11	2	6	0	0	1	8	2	6	2.8	0	5	10.709	3.421	0.00295745	0.005678	0.2471	0.2617
AT5G47960.1	protein_coding	SMG1, ATRABA4C, RABA4C	RAB GTPase homolog A4C, SMALL MOLECULAR WEIGHT G-PROTEIN 1	26	28	19	331	304	348	33	30	21	229	336	340	164.99	28	302	10.711	3.421	7.88486e-40	8.43393e-39	0.028	0.0204
AT4G27550.1	protein_coding	ATTPS4, TPS4	trehalose-6-phosphatase synthase S4, ARABIDOPSIS THALIANA TREHALOSE PHOSPHATASE/SYNTHASE 4	2	1	1	25	17	17	3	1	1	17	19	17	9.58	2	18	10.689	3.418	9.8929e-07	2.70229e-06	0.1176	0.1653
AT1G54950.1	protein_coding	-	-	0	0	1	1	8	6	0	0	1	1	9	6	2.75	0	5	10.684	3.417	0.005	0.0092779	0.2811	0.2765
AT2G22510.1	protein_coding	-	-	4	10	8	153	56	110	5	11	9	106	62	108	50.02	8	92	10.677	3.416	3.10343e-18	1.63816e-17	0.0537	0.0472
AT3G04220.3	protein_coding	-	-	16	8	11	181	172	126	20	9	12	125	190	123	79.98	14	146	10.667	3.415	1.74919e-22	1.08823e-21	0.0484	0.0323
AT1G70270.2	protein_coding	-	-	17	8	16	200	176	176	22	9	17	139	195	172	92.19	16	169	10.646	3.412	3.56182e-25	2.43351e-24	0.0435	0.0289
AT3G19580.1	protein_coding	AZF2, ZF2	zinc-finger protein 2	46	41	35	633	515	495	59	44	38	439	569	484	272.22	47	497	10.623	3.409	1.01339e-57	1.6953e-56	0.0198	0.0172
AT2G18230.1	protein_coding	AtPPa2, PPa2	pyrophosphorylase 2	229	270	221	4525	2523	2861	292	290	241	3136	2790	2799	1591.33	274	2908	10.606	3.407	3.23012e-118	1.9684e-116	0.0117	0.0126
AT1G51030.1	protein_coding	-	-	3	0	0	19	5	20	4	0	0	13	6	20	7.01	1	13	10.592	3.405	0.000184364	0.000409046	0.2298	0.1913
AT1G17950.1	protein_coding	MYB52, BW52, ATMYB52	myb domain protein 52, MYB DOMAIN PROTEIN 52	8	7	12	137	86	141	10	8	13	95	95	138	59.8	10	109	10.577	3.403	5.91992e-24	3.89065e-23	0.0371	0.041
AT1G20700.2	protein_coding	WOX14, ATWOX14	WUSCHEL RELATED HOMEOBOX 14, WUSCHEL related homeobox 14	4	4	4	60	44	60	5	4	4	42	49	59	27.12	4	50	10.574	3.402	1.03313e-13	4.37116e-13	0.0599	0.082
AT3G11580.2	protein_coding	SOD7, NGAL2	NGATHA-like protein2, suppressor of da1-1	27	35	26	441	353	375	34	38	28	306	390	367	193.87	33	354	10.565	3.401	4.17671e-53	6.23409e-52	0.0195	0.0191
AT3G21781.1	lncRNA		other RNA	4	4	0	38	33	36	5	4	0	26	36	35	17.91	3	32	10.546	3.399	1.05018e-08	3.31578e-08	0.1111	0.1133
AT2G24735.1	ncRNA		Unknown gene	0	0	1	7	6	4	0	0	1	5	7	4	2.75	0	5	10.534	3.397	0.00312006	0.0059738	0.2655	0.2689
at1g61224	miRNA	MIR842A	MIR842a; miRNA	1	0	2	14	12	16	1	0	2	10	13	16	7.01	1	13	10.528	3.396	2.46049e-05	5.95709e-05	0.1548	0.1944
AT1G76955.1	protein_coding	-	-	17	15	42	361	287	287	22	16	46	250	317	281	155.33	28	283	10.524	3.396	2.73145e-30	2.21821e-29	0.0395	0.021
AT2G21187.3	lncRNA		other RNA	15	6	4	140	82	110	19	6	4	97	91	108	54.21	10	99	10.529	3.396	2.6998e-16	1.3029e-15	0.0673	0.0447
AT4G29190.1	protein_coding	AtC3H49, AtOZF2, TZF3, AtTZF3, OZF2	tandem zinc finger 3, Arabidopsis thaliana oxidation-related zinc finger 2, oxidation-related zinc finger 2	403	442	509	7379	5217	5493	514	475	556	5114	5769	5374	2966.79	515	5419	10.528	3.396	4.2634e-117	2.55904e-115	0.0123	0.0127
AT5G01520.2	protein_coding	AtAIRP2, AIRP2	ABA Insensitive RING Protein 2	119	137	139	2038	1507	1713	152	147	152	1412	1666	1676	867.54	150	1585	10.525	3.396	1.56683e-110	8.02672e-109	0.0115	0.0137
AT3G29970.1	protein_coding	-	-	1	0	0	6	13	0	1	0	0	4	14	0	3.3	0	6	10.517	3.395	0.00671424	0.0122308	0.2841	0.2606
AT3G45860.1	protein_coding	CRK4	cysteine-rich RLK (RECEPTOR-like protein kinase) 4	6	9	9	83	107	119	8	10	10	58	118	116	53.23	9	97	10.508	3.393	4.08973e-21	2.42001e-20	0.0418	0.0463
at1g61226	miRNA	MIR846A	MIR846a; miRNA	1	0	3	19	28	11	1	0	3	13	31	11	9.91	1	18	10.483	3.39	2.44546e-05	5.92429e-05	0.1914	0.1659
AT2G35200.1	protein_coding	-	-	2	0	1	22	11	12	3	0	1	15	12	12	7.13	1	13	10.475	3.389	2.12289e-05	5.17377e-05	0.1521	0.1896
AT2G29990.1	protein_coding	NDA2	alternative NAD(P)H dehydrogenase 2	163	133	182	2373	1823	2106	208	143	199	1645	2016	2060	1045	183	1907	10.46	3.387	1.29025e-83	3.78696e-82	0.0162	0.0133
AT5G42380.1	protein_coding	AtCML37, CML37	calmodulin like 37	6	5	0	34	53	57	8	5	0	24	59	56	25.16	4	46	10.451	3.386	3.50705e-08	1.06672e-07	0.1409	0.0895
AT1G44180.1	protein_coding	-	-	11	0	4	51	67	57	14	0	4	35	74	56	30.6	6	55	10.429	3.383	8.97309e-07	2.4592e-06	0.1969	0.0759
AT5G22860.6	protein_coding	-	-	192	251	230	3670	2423	2822	245	270	251	2543	2679	2761	1458.16	255	2661	10.423	3.382	1.44306e-120	9.32189e-119	0.0112	0.0127
AT5G14130.2	protein_coding	-	-	13	6	6	100	103	128	17	6	7	69	114	125	56.33	10	103	10.412	3.38	2.8121e-15	1.28904e-14	0.0735	0.0438
AT2G29380.1	protein_coding	HAI3	highly ABA-induced PP2C gene 3	3	0	4	37	32	26	4	0	4	26	35	25	15.78	3	29	10.406	3.379	6.45761e-08	1.92935e-07	0.1216	0.1233
AT2G01422.1	ncRNA			0	1	2	8	9	22	0	1	2	6	10	22	6.71	1	13	10.396	3.378	3.88222e-05	9.22126e-05	0.1455	0.1999
AT5G38710.1	protein_coding	-	-	56	62	39	715	679	643	71	67	43	496	751	629	342.66	60	625	10.393	3.378	1.84812e-58	3.14822e-57	0.0204	0.0163
AT2G42440.1	protein_coding	LBD17, ASL15	ASYMMETRIC LEAVES 2-like 15, LOB domain-containing protein 17	0	0	1	6	4	6	0	0	1	4	4	6	2.59	0	5	10.365	3.374	0.00348486	0.00662284	0.258	0.273
AT5G44005.1	protein_coding	-	-	148	137	117	1960	1612	1687	189	147	128	1358	1782	1650	875.79	155	1597	10.37	3.374	1.18816e-75	2.91016e-74	0.0177	0.0137
AT1G63820.1	protein_coding	-	-	9	14	9	158	125	133	11	15	10	109	138	130	69.03	12	126	10.339	3.37	4.00978e-26	2.8294e-25	0.0346	0.0363
AT1G28370.1	protein_coding	ERF11, ATERF11	ERF DOMAIN PROTEIN 11, ERF domain protein 11	42	28	15	363	308	409	54	30	16	252	341	400	182.04	33	331	10.334	3.369	2.9066e-22	1.79669e-21	0.0589	0.0196
AT4G34860.2	protein_coding	A/N-InvB	alkaline/neutral invertase B	209	270	226	3861	2451	2970	266	290	247	2676	2710	2905	1515.8	268	2764	10.325	3.368	4.11651e-113	2.23145e-111	0.012	0.0127
AT2G15830.1	protein_coding	-	-	24	38	35	364	395	467	31	41	38	252	437	457	209.26	37	382	10.301	3.365	3.77439e-54	5.8457e-53	0.0189	0.0186
AT5G06705.1	lncRNA			0	1	1	7	12	8	0	1	1	5	13	8	4.69	1	9	10.303	3.365	0.00028277	0.000614988	0.1766	0.2313
AT5G18320.1	protein_coding	-	-	3	3	5	53	56	37	4	3	5	37	62	36	24.56	4	45	10.302	3.365	6.40869e-12	2.46945e-11	0.0707	0.0896
AT4G38000.1	protein_coding	DOF4.7	DNA binding with one finger 4.7	0	4	0	17	9	22	0	4	0	12	10	22	7.93	1	15	10.295	3.364	0.000325144	0.000702612	0.2856	0.182
AT1G58410.2	protein_coding	-	-	21	24	16	365	204	247	27	26	17	253	226	242	131.7	23	240	10.289	3.363	7.07397e-40	7.58689e-39	0.0247	0.0228
AT5G07475.1	protein_coding	-	-	35	38	17	403	324	431	45	41	19	279	358	422	193.86	35	353	10.287	3.363	1.42127e-30	1.16547e-29	0.0404	0.0191
AT4G14580.1	protein_coding	CIPK4, SnRK3.3	SNF1-RELATED PROTEIN KINASE 3.3, CBL-interacting protein kinase 4	111	132	123	1946	1303	1534	141	142	134	1349	1441	1501	784.63	139	1430	10.262	3.359	1.16393e-107	5.68173e-106	0.0114	0.0139
AT4G04510.2	protein_coding	CRK38	cysteine-rich RLK (RECEPTOR-like protein kinase) 38	0	0	2	6	8	11	0	0	2	4	9	11	4.33	1	8	10.229	3.355	0.000788198	0.00163019	0.2354	0.2372
AT2G34320.1	protein_coding	-	-	1	0	0	11	4	3	1	0	0	8	4	3	2.71	0	5	10.222	3.354	0.00346307	0.00658322	0.2441	0.2654
AT2G30140.1	protein_coding	UGT87A2	UDP-glucosyl transferase 87A2	316	324	267	4292	3711	3664	403	348	292	2974	4103	3584	1950.8	348	3554	10.221	3.353	3.16586e-83	9.24346e-82	0.0169	0.0125
AT3G23790.1	protein_coding	AAE16	acyl activating enzyme 16	134	216	186	3122	1618	2305	171	232	203	2164	1789	2255	1135.62	202	2069	10.22	3.353	1.45301e-87	4.6715e-86	0.0153	0.0131
AT1G73500.1	protein_coding	MKK9, ATMKK9	MAP kinase kinase 9	170	191	180	2379	2207	2351	217	205	197	1649	2440	2300	1167.92	206	2130	10.206	3.351	1.69565e-88	5.60626e-87	0.0151	0.0131
AT1G58390.1	protein_coding	-	-	2	0	0	9	8	12	3	0	0	6	9	12	4.9	1	9	10.198	3.35	0.000913508	0.00187522	0.2796	0.2261
AT1G73220.1	protein_coding	AtOCT1, OCT1	organic cation/carnitine transporter1	4	4	5	93	35	55	5	4	5	64	39	54	28.64	5	52	10.198	3.35	4.42411e-14	1.90997e-13	0.0566	0.0764
AT3G44300.1	protein_coding	AtNIT2, NIT2	nitrilase 2	369	370	397	4411	4900	5278	470	398	434	3057	5418	5163	2489.99	434	4546	10.195	3.35	7.19044e-63	1.37005e-61	0.0228	0.0126
AT5G09480.1	protein_coding	-	-	139	127	100	1513	1327	1884	177	136	109	1049	1467	1843	796.96	141	1453	10.187	3.349	7.08353e-45	8.65968e-44	0.0308	0.0139
AT1G63720.1	protein_coding	-	-	55	48	32	621	543	556	70	52	35	430	600	544	288.56	52	525	10.17	3.346	1.11386e-44	1.3546e-43	0.0271	0.017
AT5G02210.1	protein_coding	-	-	2	6	6	58	56	60	3	6	7	40	62	59	29.39	5	54	10.171	3.346	3.4285e-14	1.49119e-13	0.0574	0.0773
AT2G22630.2	protein_coding	AGL17	AGAMOUS-like 17	0	2	0	21	3	11	0	2	0	15	3	11	5.13	1	10	10.162	3.345	0.00112364	0.00228277	0.2813	0.2126
AT1G11190.1	protein_coding	ENDO1, BFN1	ENDONUCLEASE 1, bifunctional nuclease i	46	67	43	664	614	684	59	72	47	460	679	669	330.97	59	603	10.14	3.342	7.18794e-64	1.39138e-62	0.0176	0.0165
AT4G18330.1	protein_coding	-	-	0	0	3	27	9	8	0	0	3	19	10	8	6.63	1	12	10.126	3.34	0.000358605	0.000770691	0.2587	0.1921
AT1G80820.2	protein_coding	CCR2, ATCCR2	cinnamoyl coa reductase	53	18	24	473	307	381	68	19	26	328	339	373	192.18	38	347	10.104	3.337	7.85321e-26	5.49018e-25	0.049	0.0192
AT5G05110.1	protein_coding	-	-	216	241	240	3438	2537	2938	275	259	262	2383	2805	2874	1476.41	265	2687	10.096	3.336	7.76801e-109	3.85931e-107	0.0122	0.0127
AT5G43170.1	protein_coding	AZF3, ZF3	zinc-finger protein 3	51	51	49	605	602	713	65	55	54	419	666	697	325.96	58	594	10.096	3.336	5.05232e-55	8.0067e-54	0.0211	0.0165
AT2G22240.3	protein_coding	MIPS2, ATIPS2, ATMIPS2	myo-inositol-1-phosphate synthase 2, INOSITOL 3-PHOSPHATE SYNTHASE 2, MYO-INOSITOL-1-PHOSTPATE SYNTHASE 2	335	389	418	6903	3879	4175	427	418	457	4784	4289	4084	2409.83	434	4386	10.084	3.334	3.78835e-116	2.22613e-114	0.0119	0.0126
AT4G28490.1	protein_coding	HAE, RLK5	RECEPTOR-LIKE PROTEIN KINASE 5, HAESA	108	170	122	2546	1269	1439	138	183	133	1764	1403	1408	838.16	151	1525	10.064	3.331	5.91447e-83	1.71434e-81	0.0155	0.0138
AT4G34071.1	lncRNA		other RNA	1	3	1	17	24	21	1	3	1	12	27	21	10.74	2	20	10.059	3.33	6.29943e-07	1.74751e-06	0.1111	0.1588
AT5G20860.2	protein_coding	-	-	9	15	10	177	135	120	11	16	11	123	149	117	71.31	13	130	10.045	3.328	1.01569e-26	7.29958e-26	0.033	0.0353
AT1G05103.1	lncRNA			0	1	1	9	15	4	0	1	1	6	17	4	4.82	1	9	10.037	3.327	0.000459879	0.000975748	0.188	0.2286
AT1G28190.1	protein_coding	-	-	123	151	155	1802	1882	1688	157	162	169	1249	2081	1651	911.59	163	1660	10.018	3.324	1.05221e-87	3.39462e-86	0.0146	0.0136
AT3G09010.2	protein_coding	-	-	50	32	49	554	562	532	64	34	54	384	621	520	279.57	51	508	10.012	3.324	1.72101e-38	1.76589e-37	0.0319	0.0171
AT5G35688.2	protein_coding	-	-	0	0	1	16	5	1	0	0	1	11	6	1	3.11	0	6	10.015	3.324	0.00504347	0.00935235	0.2803	0.2514
AT4G17030.1	protein_coding	AT-EXPR, EXPR, ATHEXP BETA 3.1, ATEXPR1, ATEXLB1, EXLB1	expansin-like B1	88	133	134	1847	1209	1412	112	143	146	1280	1337	1381	733.27	134	1333	9.972	3.318	3.98911e-103	1.80257e-101	0.0116	0.0141
AT5G19490.1	protein_coding	-	-	14	19	7	189	154	153	18	20	8	131	170	150	82.81	15	150	9.973	3.318	2.28184e-25	1.56973e-24	0.0389	0.0313
AT3G03470.1	protein_coding	CYP89A9	"cytochrome P450, family 87, subfamily A, polypeptide 9"	312	386	391	5816	3849	4161	398	415	427	4031	4256	4071	2266.13	413	4119	9.966	3.317	1.95279e-123	1.35202e-121	0.011	0.0125
AT5G16770.2	protein_coding	AtMYB9, MYB9	myb domain protein 9	9	10	4	162	56	98	11	11	4	112	62	96	49.44	9	90	9.967	3.317	1.7935e-17	9.16942e-17	0.0539	0.0476
AT5G39330.1	protein_coding	-	-	1	3	0	21	11	22	1	3	0	15	12	22	8.79	1	16	9.958	3.316	2.11614e-05	5.15776e-05	0.1736	0.1726
AT5G66815.1	protein_coding	CEP5	C-TERMINALLY ENCODED PEPTIDE 5 (	4	3	3	48	31	52	5	3	3	33	34	51	21.67	4	39	9.936	3.313	3.57954e-11	1.32176e-10	0.0708	0.0978
AT2G09700.1	snoRNA			31	36	34	470	365	430	40	39	37	326	404	421	210.88	39	384	9.926	3.311	3.14872e-54	4.89293e-53	0.0186	0.0186
AT4G15120.1	protein_coding	-	-	10	7	1	69	67	84	13	8	1	48	74	82	37.57	7	68	9.901	3.308	2.79737e-10	9.81377e-10	0.1115	0.063
AT2G16890.1	protein_coding	-	-	35	29	21	632	222	303	45	31	23	438	245	296	179.76	33	326	9.888	3.306	4.68935e-47	6.0445e-46	0.0211	0.0196
AT5G35732.1	protein_coding	-	-	96	110	126	1445	1317	1344	122	118	138	1001	1456	1315	691.78	126	1257	9.892	3.306	1.11343e-89	3.76586e-88	0.0135	0.0143
AT4G39795.1	protein_coding	-	-	24	28	12	274	233	282	31	30	13	190	258	276	132.86	25	241	9.884	3.305	5.6328e-28	4.22853e-27	0.0399	0.0228
AT2G27180.1	protein_coding	-	-	8	3	8	82	68	88	10	3	9	57	75	86	40.04	7	73	9.876	3.304	3.24905e-15	1.48374e-14	0.0608	0.0591
AT3G04060.1	protein_coding	NAC046, anac046	NAC domain containing protein 46	39	33	39	560	382	458	50	35	43	388	422	448	231.05	43	419	9.876	3.304	2.6363e-55	4.20171e-54	0.0187	0.018
AT2G47000.6	protein_coding	AtABCB4, MDR4, ATPGP4, PGP4, ABCB4	P-GLYCOPROTEIN 4, MULTIDRUG RESISTANCE 4, ARABIDOPSIS P-GLYCOPROTEIN 4, ATP-binding cassette B4	461	458	361	6598	4286	5188	587	492	394	4573	4739	5075	2643.51	491	4796	9.861	3.302	3.82796e-87	1.21235e-85	0.0159	0.0126
AT3G48700.1	protein_coding	ATCXE13, CXE13	carboxyesterase 13	12	14	11	196	116	160	15	15	12	136	128	157	77.16	14	140	9.848	3.3	4.5243e-27	3.29298e-26	0.0333	0.0329
AT3G09640.1	protein_coding	APX1B, APX2	ASCORBATE PEROXIDASE 1B, ascorbate peroxidase 2	1	0	0	5	6	5	1	0	0	3	7	5	2.71	0	5	9.845	3.299	0.00448311	0.00837879	0.2815	0.2727
AT3G45540.1	protein_coding	-	-	1	0	0	5	6	5	1	0	0	3	7	5	2.71	0	5	9.845	3.299	0.00447989	0.00837334	0.2813	0.2727
AT1G08533.1	lncRNA			1	0	0	4	7	5	1	0	0	3	8	5	2.78	0	5	9.839	3.298	0.00488929	0.00908814	0.2911	0.2726
AT2G01520.1	protein_coding	MLP328, ZCE1	(Zusammen-CA)-enhanced 1, MLP-like protein 328	335	310	238	4109	2825	4088	427	333	260	2848	3124	3999	1831.76	340	3324	9.833	3.298	2.98344e-57	4.93786e-56	0.0243	0.0126
AT1G24580.1	protein_coding	-	-	8	13	3	167	74	71	10	14	3	116	82	69	49.08	9	89	9.827	3.297	1.93569e-17	9.88557e-17	0.0534	0.048
AT3G09390.1	protein_coding	MT2A, ATMT-1, ATMT-K	ARABIDOPSIS THALIANA METALLOTHIONEIN-1, ARABIDOPSIS THALIANA METALLOTHIONEIN-K, metallothionein 2A	4152	5535	4985	65940	49071	67085	5291	5948	5447	45698	54260	65626	30378.4	5562	55195	9.826	3.297	2.82811e-67	5.88579e-66	0.0217	0.0218
AT5G33290.1	protein_coding	XGD1	xylogalacturonan deficient 1	284	359	293	5037	3151	3577	362	386	320	3491	3484	3499	1923.67	356	3491	9.829	3.297	1.64726e-114	9.2336e-113	0.0116	0.0125
AT1G26558.1	ncRNA		other RNA	1	0	0	4	6	6	1	0	0	3	7	6	2.76	0	5	9.824	3.296	0.00478711	0.00890709	0.2898	0.2726
AT1G65570.1	protein_coding	-	-	2	0	1	23	4	17	3	0	1	16	4	17	6.77	1	12	9.816	3.295	5.12393e-05	0.000120176	0.1454	0.1918
AT1G73700.1	protein_coding	-	-	13	11	13	203	113	157	17	12	14	141	125	154	76.97	14	140	9.812	3.295	1.23826e-27	9.19683e-27	0.032	0.033
AT2G01660.2	protein_coding	PDLP6	plasmodesmata-located protein 6	95	124	101	1702	1042	1275	121	133	110	1180	1152	1247	657.28	121	1193	9.812	3.295	2.26664e-97	9.05716e-96	0.012	0.0144
AT3G27150.2	protein_coding	-	-	22	21	16	277	183	287	28	23	17	192	202	281	123.86	23	225	9.817	3.295	6.44059e-32	5.4974e-31	0.0321	0.0237
AT4G11890.2	protein_coding	ARCK1, CRK45	ABA- AND OSMOTIC-STRESS-INDUCIBLE RECEPTOR-LIKE CYTOSOLIC KINASE1, cysteine-rich receptor-like protein kinase 45	30	34	37	352	426	457	38	37	40	244	471	447	212.88	38	387	9.816	3.295	5.14192e-45	6.31086e-44	0.0237	0.0185
AT1G21400.3	protein_coding	-	-	276	383	384	5556	3535	3911	352	412	420	3850	3909	3826	2128.01	395	3862	9.809	3.294	4.40855e-116	2.57436e-114	0.0115	0.0125
AT2G19500.1	protein_coding	CKX2, ATCKX2	cytokinin oxidase 2	1	0	4	13	36	15	1	0	4	9	40	15	11.52	2	21	9.806	3.294	4.78217e-05	0.000112452	0.2082	0.1555
AT2G35343.1	protein_coding	-	-	1	5	4	42	41	37	1	5	4	29	45	36	20.28	3	37	9.809	3.294	1.0552e-10	3.79174e-10	0.0733	0.1036
AT4G13110.1	protein_coding	-	-	38	31	48	615	404	445	48	33	52	426	447	435	240.41	44	436	9.803	3.293	1.60529e-54	2.5169e-53	0.0193	0.0178
AT3G19090.1	protein_coding	LARP6c, AtLARP6c	La related protein 6c	0	0	2	8	9	8	0	0	2	6	10	8	4.25	1	8	9.778	3.29	0.00113416	0.00230265	0.2584	0.2374
AT3G13672.1	protein_coding	SINA2		60	73	66	1042	662	783	76	78	72	722	732	766	407.86	75	740	9.768	3.288	1.20123e-87	3.87093e-86	0.012	0.0158
AT4G12890.1	protein_coding	-	-	15	14	10	201	111	187	19	15	11	139	123	183	81.68	15	148	9.77	3.288	2.90044e-25	1.98843e-24	0.0379	0.0315
AT4G16600.1	protein_coding	PGSIP8	plant glycogenin-like starch initiation protein 8	18	3	4	162	52	89	23	3	4	112	57	87	47.89	10	85	9.749	3.285	2.43841e-14	1.06904e-13	0.0714	0.0491
at5g15833	miRNA	MIR865A	MIR865a; miRNA	1	1	1	11	8	22	1	1	1	8	9	22	6.91	1	13	9.745	3.285	4.08459e-05	9.6781e-05	0.1411	0.1962
AT1G68450.1	protein_coding	PDE337	PIGMENT DEFECTIVE 337	8	14	17	143	160	158	10	15	19	99	177	155	79.07	15	144	9.738	3.284	2.83501e-27	2.0775e-26	0.0325	0.0327
AT3G26830.1	protein_coding	PAD3, CYP71B15	PHYTOALEXIN DEFICIENT 3	138	112	72	808	1978	1223	176	120	79	560	2187	1196	719.74	125	1314	9.738	3.284	1.93624e-17	9.88658e-17	0.0791	0.0142
AT1G65510.2	protein_coding	-	-	18	10	16	137	163	251	23	11	17	95	180	246	95.31	17	174	9.736	3.283	1.20013e-19	6.70575e-19	0.0565	0.0284
AT5G58860.1	protein_coding	CYP86, HORST, CYP86A1	hydroxylase of root suberized tissue, "cytochrome P450, family 86, subfamily A, polypeptide 1"	226	195	93	2182	1714	2115	288	210	102	1512	1895	2069	1012.6	200	1825	9.724	3.282	6.22717e-31	5.15478e-30	0.0449	0.0133
AT4G26270.1	protein_coding	PFK3	phosphofructokinase 3	111	134	146	2116	1258	1497	141	144	160	1466	1391	1464	794.48	148	1440	9.704	3.279	2.56024e-105	1.19753e-103	0.0113	0.0139
AT1G32960.1	protein_coding	ATSBT3.3, SBT3.3		12	11	12	132	153	141	15	12	13	91	169	138	73.14	13	133	9.687	3.276	2.0406e-23	1.31606e-22	0.0398	0.0349
AT1G66465.1	protein_coding	-	-	11	5	0	52	61	60	14	5	0	36	67	59	30.26	6	54	9.679	3.275	3.81965e-07	1.07788e-06	0.1739	0.0764
AT2G24430.1	protein_coding	ANAC039, ANAC038, NAC038	NAC domain containing protein 38, Arabidopsis NAC domain containing protein 39	14	7	4	114	80	112	18	8	4	79	88	110	51.13	10	92	9.681	3.275	2.27162e-14	9.97637e-14	0.074	0.0474
AT1G24735.2	protein_coding	-	-	11	5	4	117	53	85	14	5	4	81	59	83	41.1	8	74	9.664	3.273	1.71167e-15	7.93586e-15	0.0585	0.0567
AT3G06515.1	lncRNA			1	0	0	5	4	7	1	0	0	3	4	7	2.67	0	5	9.665	3.273	0.00496885	0.00922376	0.2826	0.2728
AT4G04955.2	protein_coding	ALN, ATALN	allantoinase	349	365	512	6073	4226	4611	445	392	559	4209	4673	4511	2464.8	465	4464	9.669	3.273	1.72198e-97	6.90052e-96	0.0139	0.0126
AT1G02310.2	protein_coding	MAN1	endo-beta-mannanase 1	6	17	8	139	120	105	8	18	9	96	133	103	61.07	12	111	9.659	3.272	3.15184e-22	1.94479e-21	0.0397	0.0405
AT2G24130.2	protein_coding	-	-	1	1	0	8	6	15	1	1	0	6	7	15	4.87	1	9	9.652	3.271	0.000531839	0.00112044	0.2033	0.226
AT1G23070.1	protein_coding	-	-	1	0	0	4	9	3	1	0	0	3	10	3	2.82	0	5	9.648	3.27	0.00621923	0.0113787	0.297	0.2725
AT2G44590.3	protein_coding	DL1D, ADL1D	DYNAMIN-like 1D	0	1	1	6	10	9	0	1	1	4	11	9	4.36	1	8	9.644	3.27	0.000485848	0.00102796	0.1809	0.2371
AT4G18195.1	protein_coding	PUP8, ATPUP8	ARABIDOPSIS THALIANA PURINE PERMEASE 8, purine permease 8	3	4	1	27	32	39	4	4	1	19	35	38	16.91	3	31	9.637	3.269	1.59272e-08	4.97042e-08	0.0985	0.1193
AT2G36750.1	protein_coding	UGT73C1	UDP-glucosyl transferase 73C1	119	149	99	1873	1278	1327	152	160	108	1298	1413	1298	738.21	140	1336	9.628	3.267	2.37819e-91	8.36733e-90	0.0131	0.0141
AT1G64970.1	protein_coding	TMT1, G-TMT, VTE4	gamma-tocopherol methyltransferase, VITAMIN E DEFICIENT 4	177	231	230	3384	2047	2423	226	248	251	2345	2263	2370	1284.01	242	2326	9.62	3.266	4.45989e-113	2.40826e-111	0.0111	0.0129
AT5G09675.1	lncRNA			1	0	0	7	4	5	1	0	0	5	4	5	2.57	0	5	9.619	3.266	0.00466351	0.00869446	0.2672	0.2731
AT5G66630.1	protein_coding	DAR5	DA1-related protein 5	72	50	43	855	536	633	92	54	47	593	593	619	332.82	64	602	9.619	3.266	9.14541e-54	1.39632e-52	0.0213	0.0164
AT2G29670.2	protein_coding	-	-	2277	2279	2619	40886	22586	26121	2901	2449	2862	28335	24975	25553	14512.5	2737	26288	9.615	3.265	7.90393e-89	2.62255e-87	0.016	0.018
AT1G34410.1	protein_coding	ARF21	auxin response factor 21	0	0	1	6	4	5	0	0	1	4	4	5	2.43	0	4	9.61	3.264	0.00520306	0.00962914	0.2694	0.2773
AT5G13580.1	protein_coding	ABCG6	ATP-binding cassette G6	58	79	46	939	564	734	74	85	50	651	624	718	366.92	70	664	9.593	3.262	1.44271e-60	2.59846e-59	0.0186	0.0161
AT5G17030.1	protein_coding	UGT78D3	UDP-glucosyl transferase 78D3	1	4	0	29	14	19	1	4	0	20	15	19	9.96	2	18	9.592	3.262	1.13379e-05	2.83256e-05	0.1673	0.1603
AT5G23190.1	protein_coding	CYP86B1	"cytochrome P450, family 86, subfamily B, polypeptide 1"	59	38	47	727	434	610	75	41	51	504	480	597	291.31	56	527	9.581	3.26	4.51997e-55	7.16713e-54	0.0198	0.0169
AT1G77920.1	protein_coding	TGA7	TGACG sequence-specific binding protein 7	463	596	557	7398	5768	6294	590	641	609	5127	6378	6157	3250.2	613	5887	9.569	3.258	4.99779e-115	2.85292e-113	0.0117	0.0129
AT5G50260.1	protein_coding	CEP1	cysteine endopeptidase 1	44	35	42	522	432	509	56	38	46	362	478	498	246.16	47	446	9.561	3.257	2.31069e-48	3.08508e-47	0.0223	0.0177
AT1G74360.1	protein_coding	-	-	47	70	53	777	593	662	60	75	58	538	656	648	339.14	64	614	9.54	3.254	5.64801e-74	1.34223e-72	0.0139	0.0164
AT2G17500.2	protein_coding	PILS5	PIN-LIKES 5	528	495	530	6250	5684	6705	673	532	579	4331	6285	6559	3159.93	595	5725	9.522	3.251	1.00766e-67	2.12879e-66	0.0203	0.0128
AT3G05390.1	protein_coding	-	-	6	6	5	94	45	77	8	6	5	65	50	75	34.96	6	63	9.518	3.251	3.03687e-15	1.38957e-14	0.0531	0.0654
AT5G08790.1	protein_coding	ATAF2, anac081	Arabidopsis NAC domain containing protein 81	434	505	442	5253	5484	5775	553	543	483	3640	6064	5649	2822.08	526	5118	9.523	3.251	1.57851e-71	3.57801e-70	0.0191	0.0127
AT1G29020.2	protein_coding	-	-	39	41	32	493	336	541	50	44	35	342	372	529	228.52	43	414	9.511	3.25	6.74961e-43	7.7885e-42	0.0254	0.0181
AT3G22600.1	protein_coding	LTPG5	glycosylphosphatidylinositol-anchored lipid protein transfer 5	138	97	68	1144	1255	1114	176	104	74	793	1388	1090	604.12	118	1090	9.514	3.25	5.66017e-31	4.69516e-30	0.0428	0.0146
AT3G02205.1	snoRNA			3	11	3	43	67	77	4	12	3	30	74	75	33.02	6	60	9.505	3.249	1.67891e-12	6.66962e-12	0.071	0.0712
AT4G33050.5	protein_coding	AtIQM1, IQM1, EDA39	IQ-motif protein 1, embryo sac development arrest 39	397	422	390	5494	4542	4490	506	454	426	3807	5022	4392	2434.61	462	4407	9.508	3.249	1.62573e-94	6.13676e-93	0.0142	0.0126
AT3G29035.1	protein_coding	NAC3, ANAC059, ATNAC3, ORS1	Arabidopsis NAC domain containing protein 59, ORE1 SISTER1, NAC domain containing protein 3	121	125	111	1366	1365	1531	154	134	121	947	1509	1498	727.25	136	1318	9.485	3.246	1.06869e-60	1.93478e-59	0.0207	0.0141
AT5G26310.1	protein_coding	UGT72E3		21	16	2	180	91	181	27	17	2	125	101	177	74.76	15	134	9.485	3.246	6.07605e-11	2.21524e-10	0.1156	0.0338
AT2G15480.1	protein_coding	UGT73B5	UDP-glucosyl transferase 73B5	114	101	128	1551	1274	1275	145	109	140	1075	1409	1247	687.42	131	1244	9.466	3.243	4.56476e-75	1.10355e-73	0.0161	0.0143
AT2G26400.2	protein_coding	ARD3, ARD, ATARD3	ACIREDUCTONE DIOXYGENASE, acireductone dioxygenase 3	10	19	7	103	153	155	13	20	8	71	169	152	72.17	14	131	9.463	3.242	1.52875e-20	8.81843e-20	0.0467	0.0355
AT3G49760.1	protein_coding	bZIP5, AtbZIP5	basic leucine-zipper 5	18	8	4	148	83	123	23	9	4	103	92	120	58.43	12	105	9.463	3.242	1.15823e-14	5.1612e-14	0.0739	0.0418
AT4G37940.2	protein_coding	AGL21	AGAMOUS-like 21	2	5	2	31	38	35	3	5	2	21	42	34	17.97	3	32	9.461	3.242	1.35162e-09	4.52933e-09	0.0789	0.1142
at5g10945	miRNA	MIR156D	MIR156D; miRNA	0	3	2	24	17	19	0	3	2	17	19	19	9.9	2	18	9.462	3.242	2.84211e-06	7.47712e-06	0.1297	0.1625
AT5G27020.1	protein_coding	-	-	0	0	1	12	2	4	0	0	1	8	2	4	2.59	0	5	9.46	3.242	0.00580528	0.0106737	0.2637	0.2657
AT4G21980.1	protein_coding	APG8A, ATG8A	AUTOPHAGY-RELATED 8A, AUTOPHAGY 8A	354	403	422	4722	4225	5067	451	433	461	3272	4672	4957	2374.39	448	4300	9.451	3.241	8.73619e-90	2.96194e-88	0.0148	0.0125
AT1G76070.1	protein_coding	-	-	79	57	70	840	797	811	101	61	76	582	881	793	415.87	79	752	9.443	3.239	9.03199e-48	1.18943e-46	0.0252	0.0157
AT3G57510.1	protein_coding	ADPG1		2	5	0	35	38	8	3	5	0	24	42	8	13.67	3	25	9.432	3.238	1.96915e-07	5.67768e-07	0.0971	0.1358
AT1G69610.3	protein_coding	-	-	142	148	136	2077	1468	1571	181	159	149	1439	1623	1537	848.01	163	1533	9.428	3.237	9.39218e-97	3.69492e-95	0.0123	0.0137
AT5G22250.1	protein_coding	AtCAF1b, CAF1b	CCR4- associated factor 1b	67	64	80	784	766	946	85	69	87	543	847	925	426.22	80	772	9.425	3.236	3.34918e-62	6.27461e-61	0.0182	0.0157
AT1G23770.1	protein_coding	-	-	0	1	0	5	3	7	0	1	0	3	3	7	2.45	0	4	9.413	3.235	0.0063762	0.0116514	0.286	0.2772
AT1G78190.1	protein_coding	-	-	34	31	34	401	359	415	43	33	37	278	397	406	199.11	38	360	9.415	3.235	4.78644e-44	5.71654e-43	0.0233	0.0189
AT4G33820.1	protein_coding	-	-	1	1	1	15	12	12	1	1	1	10	13	12	6.47	1	12	9.416	3.235	3.74236e-05	8.90191e-05	0.1358	0.2006
AT3G21320.1	protein_coding	-	-	1	1	0	20	5	6	1	1	0	14	6	6	4.6	1	9	9.396	3.232	0.000471909	0.000999755	0.1746	0.2222
AT4G05020.1	protein_coding	NDB2	NAD(P)H dehydrogenase B2	286	314	257	3990	2789	3439	364	337	281	2765	3084	3364	1699.33	327	3071	9.388	3.231	1.83039e-87	5.87804e-86	0.0149	0.0126
AT5G39180.1	protein_coding	-	-	3	4	3	40	40	39	4	4	3	28	44	38	20.25	4	37	9.388	3.231	1.06605e-10	3.82977e-10	0.069	0.104
AT2G31930.1	protein_coding	-	-	0	1	0	5	2	9	0	1	0	3	2	9	2.59	0	5	9.38	3.23	0.00726892	0.0131769	0.2984	0.2729
AT1G18100.1	protein_coding	E12A11, MFT	MOTHER OF FT AND TFL1	13	5	5	105	67	103	17	5	5	73	74	101	45.84	9	83	9.363	3.227	4.10444e-14	1.7769e-13	0.0705	0.0521
AT1G17170.1	protein_coding	GST, ATGSTU24, GSTU24	glutathione S-transferase TAU 24, Arabidopsis thaliana Glutathione S-transferase (class tau) 24	135	306	177	2763	2188	2025	172	329	193	1915	2419	1981	1168.24	231	2105	9.35	3.225	6.32473e-88	2.06188e-86	0.0142	0.0131
AT4G11000.1	protein_coding	-	-	21	10	19	223	178	189	27	11	21	155	197	185	99.09	20	179	9.331	3.222	8.41941e-25	5.67878e-24	0.041	0.0274
AT1G66400.1	protein_coding	CML23	calmodulin like 23	62	90	89	795	919	1061	79	97	97	551	1016	1038	479.67	91	868	9.325	3.221	3.48907e-78	8.93706e-77	0.0138	0.0153
AT1G54160.1	protein_coding	NFYA5, NF-YA5	"nuclear factor Y, subunit A5", NUCLEAR FACTOR Y A5	32	39	38	623	344	362	41	42	42	432	380	354	215.08	42	389	9.318	3.22	4.00386e-54	6.19425e-53	0.0178	0.0184
AT1G06570.2	protein_coding	HPPD, PDS1, HPD	4-hydroxyphenylpyruvate dioxygenase, phytoene desaturation 1	478	429	507	7551	4328	5136	609	461	554	5233	4786	5024	2777.85	541	5014	9.311	3.219	4.89001e-111	2.53763e-109	0.0118	0.0127
AT5G39610.1	protein_coding	ANAC092, ATNAC2, NAC2, NAC6, ATNAC6, ORE1	NAC domain containing protein 6, NAC domain containing protein 2, ORESARA 1, Arabidopsis NAC domain containing protein 92	128	146	139	1514	1625	1684	163	157	152	1049	1797	1647	827.56	157	1498	9.31	3.219	2.97123e-69	6.46255e-68	0.0178	0.0138
AT1G66780.1	protein_coding	-	-	0	0	1	2	5	6	0	0	1	1	6	6	2.31	0	4	9.282	3.214	0.00816708	0.0147012	0.2845	0.2859
AT4G34135.2	protein_coding	UGT73B2	UDP-glucosyltransferase 73B2	118	179	98	2198	965	1597	150	192	107	1523	1067	1562	767.06	150	1384	9.276	3.214	3.1289e-45	3.86565e-44	0.0284	0.014
AT1G66930.2	protein_coding	LRK10L2	Leaf rust 10 disease-resistance locus receptor- like protein kinase-like2	4	1	2	37	16	35	5	1	2	26	18	34	14.32	3	26	9.254	3.21	8.70158e-08	2.57258e-07	0.1006	0.1298
AT1G21326.1	protein_coding	-	-	4	3	1	39	25	34	5	3	1	27	28	33	16.22	3	29	9.25	3.209	2.00332e-08	6.20611e-08	0.0965	0.1203
AT5G44350.1	protein_coding	-	-	20	17	9	190	157	189	25	18	10	132	174	185	90.63	18	164	9.237	3.207	6.67083e-22	4.07224e-21	0.0469	0.0293
AT1G15520.1	protein_coding	ATABCG40, ABCG40, PDR12, ATPDR12	pleiotropic drug resistance 12, ATP-binding cassette G40, PLEIOTROPIC DRUG RESISTANCE 12, Arabidopsis thaliana ATP-binding cassette G40	38	38	33	418	505	348	48	41	36	290	558	340	218.97	42	396	9.207	3.203	7.38431e-40	7.91063e-39	0.0267	0.0184
AT4G09605.1	lncRNA			2	2	5	20	31	50	3	2	5	14	34	49	17.87	3	32	9.204	3.202	4.86539e-09	1.57238e-08	0.0811	0.1157
AT4G19230.1	protein_coding	CYP707A1	"cytochrome P450, family 707, subfamily A, polypeptide 1"	82	98	86	1419	837	910	104	105	94	983	926	890	517.15	101	933	9.203	3.202	4.10131e-94	1.53161e-92	0.0112	0.0151
AT5G44360.1	protein_coding	AtBBE23		2	1	0	14	9	16	3	1	0	10	10	16	6.49	1	12	9.187	3.2	0.000133594	0.000300672	0.1823	0.2005
AT4G28330.1	protein_coding	-	-	30	14	23	257	243	270	38	15	25	178	269	264	131.56	26	237	9.182	3.199	3.6662e-23	2.34555e-22	0.0481	0.0229
AT1G67940.1	protein_coding	AtSTAR1, NAP3, ATNAP3, ABCI17	ARABIDOPSIS THALIANA NON-INTRINSIC ABC PROTEIN 3, non-intrinsic ABC protein 3, ATP-binding cassette I17	152	139	136	1694	1470	1778	194	149	149	1174	1625	1739	838.41	164	1513	9.164	3.196	1.37914e-61	2.54795e-60	0.0201	0.0138
AT1G04560.1	protein_coding	-	-	0	2	0	15	5	7	0	2	0	10	6	7	4.15	1	8	9.159	3.195	0.00175133	0.00347299	0.2704	0.2325
AT2G40200.1	protein_coding	-	-	13	25	7	208	161	133	17	27	8	144	178	130	83.89	17	151	9.16	3.195	1.46306e-24	9.80433e-24	0.038	0.0309
AT2G47800.1	protein_coding	ABCC4, ATMRP4, MRP4, EST3	multidrug resistance-associated protein 4, ATP-binding cassette C4	343	369	275	6381	2529	3314	437	397	300	4422	2796	3242	1932.44	378	3487	9.154	3.194	1.82492e-86	5.69698e-85	0.0149	0.0125
AT2G25000.1	protein_coding	WRKY60, ATWRKY60	WRKY DNA-binding protein 60	125	131	95	1455	1236	1330	159	141	104	1008	1367	1301	680	135	1225	9.125	3.19	7.48253e-64	1.4464e-62	0.0188	0.0143
AT3G24310.1	protein_coding	MYB305, ATMYB71	myb domain protein 305, MYB DOMAIN PROTEIN 71	3	1	1	37	11	18	4	1	1	26	12	18	10.23	2	19	9.118	3.189	1.72224e-06	4.624e-06	0.1101	0.1558
AT3G03675.1	lncRNA			0	0	1	5	5	4	0	0	1	3	6	4	2.33	0	4	9.092	3.185	0.00729791	0.0132244	0.2868	0.2816
AT1G67860.1	protein_coding	-	-	183	160	175	1994	1693	2278	233	172	191	1382	1872	2228	1013.12	199	1827	9.091	3.184	2.79076e-60	4.97834e-59	0.0209	0.0133
AT5G06090.1	protein_coding	GPAT7, ATGPAT7	GLYCEROL-3-PHOSPHATE sn-2-ACYLTRANSFERASE 7	5	6	7	96	44	77	6	6	8	67	49	75	35.16	7	64	9.073	3.182	2.84259e-15	1.3028e-14	0.0504	0.065
AT3G16900.1	protein_coding	-	-	3	7	7	50	80	56	4	8	8	35	88	55	32.81	7	59	9.067	3.181	7.9313e-14	3.37923e-13	0.0559	0.0716
AT3G15250.1	protein_coding	-	-	2	0	0	13	3	11	3	0	0	9	3	11	4.27	1	8	9.065	3.18	0.00165744	0.00329778	0.249	0.2323
AT1G04767.1	lncRNA			1	0	0	10	3	3	1	0	0	7	3	3	2.41	0	4	9.043	3.177	0.00671479	0.012231	0.2557	0.2735
AT2G01175.1	protein_coding	-	-	4	3	8	45	65	57	5	3	9	31	72	56	29.31	6	53	9.028	3.174	1.45755e-11	5.5019e-11	0.0734	0.0787
AT3G25640.2	protein_coding	-	-	36	28	22	348	278	356	46	30	24	241	307	348	166.14	33	299	9.008	3.171	1.06354e-30	8.74176e-30	0.0347	0.0204
AT3G59140.1	protein_coding	ATMRP14, MRP14, ABCC10	multidrug resistance-associated protein 14, ATP-binding cassette C10	551	994	737	12892	6165	7380	702	1068	805	8934	6817	7220	4257.76	858	7657	8.978	3.166	5.26185e-62	9.79236e-61	0.0214	0.0134
AT2G25600.1	protein_coding	SPIK, AKT6	Shaker pollen inward K+ channel	0	1	0	2	8	2	0	1	0	1	9	2	2.21	0	4	8.966	3.164	0.0123789	0.0216569	0.2853	0.2907
AT5G57910.2	protein_coding	-	-	61	85	82	893	800	845	78	91	90	619	885	827	431.46	86	777	8.956	3.163	5.81537e-83	1.68736e-81	0.0121	0.0156
AT4G01610.1	protein_coding	AtcathB3		1236	1350	1346	16947	12488	15166	1575	1451	1471	11745	13809	14836	7481	1499	13463	8.947	3.161	1.47298e-85	4.49788e-84	0.0156	0.0151
AT4G21020.1	protein_coding	-	-	1	1	1	19	9	11	1	1	1	13	10	11	6.22	1	11	8.947	3.161	5.92579e-05	0.000138194	0.1352	0.2011
AT5G25920.1	protein_coding	-	-	1	5	0	9	24	27	1	5	0	6	27	26	10.97	2	20	8.946	3.161	2.3652e-05	5.73532e-05	0.1675	0.1594
AT1G57943.2	protein_coding	ATPUP17, PUP17	purine permease 17	4	6	1	47	34	44	5	6	1	33	38	43	20.97	4	38	8.935	3.16	2.38989e-09	7.88018e-09	0.0909	0.1004
AT3G51430.1	protein_coding	YLS2, SSL5	YELLOW-LEAF-SPECIFIC GENE 2, STRICTOSIDINE SYNTHASE-LIKE 5	301	388	371	4137	3705	4014	384	417	405	2867	4097	3927	2016.08	402	3630	8.938	3.16	1.04977e-99	4.44895e-98	0.0126	0.0125
AT3G61630.1	protein_coding	CRF6	cytokinin response factor 6	120	143	139	1601	1376	1531	153	154	152	1110	1522	1498	764.54	153	1377	8.934	3.159	2.39415e-87	7.65334e-86	0.013	0.014
AT5G64800.1	protein_coding	CLE21	CLAVATA3/ESR-RELATED 21	21	11	8	165	114	172	27	12	9	114	126	168	76	16	136	8.913	3.156	8.75997e-17	4.32219e-16	0.0626	0.0336
AT1G48325.1	protein_coding	-	-	1	0	2	9	13	13	1	0	2	6	14	13	6.13	1	11	8.904	3.154	0.000198499	0.000439119	0.1807	0.2086
AT2G15390.2	protein_coding	atfut4, FUT4	fucosyltransferase 4	114	79	87	945	1018	1158	145	85	95	655	1126	1133	539.77	108	971	8.896	3.153	6.20993e-34	5.66345e-33	0.0364	0.015
AT2G20921.1	protein_coding	-	-	0	1	0	5	6	2	0	1	0	3	7	2	2.19	0	4	8.88	3.151	0.00958879	0.0170714	0.2784	0.2863
AT2G36295.1	protein_coding	-	-	3	1	3	35	19	29	4	1	3	24	21	28	13.63	3	24	8.88	3.151	8.15588e-08	2.41687e-07	0.0929	0.1343
AT1G21110.1	protein_coding	IGMT3	indole glucosinolate O-methyltransferase 3	188	164	169	2027	1789	2014	240	176	185	1405	1978	1970	992.27	200	1784	8.878	3.15	1.25756e-60	2.26937e-59	0.0203	0.0134
AT5G45880.1	protein_coding	-	-	0	0	1	9	0	7	0	0	1	6	0	7	2.36	0	4	8.877	3.15	0.01085	0.0191412	0.2646	0.2735
AT1G54470.1	protein_coding	RPP27	resistance to Peronospora parasitica 27	3	8	1	47	42	38	4	9	1	33	46	37	21.62	5	39	8.87	3.149	1.4008e-09	4.68739e-09	0.0875	0.0986
AT5G02200.1	protein_coding	FHL	far-red-elongated hypocotyl1-like	28	37	30	468	315	297	36	40	33	324	348	291	178.57	36	321	8.871	3.149	1.04954e-47	1.37695e-46	0.0189	0.0197
AT2G09515.1	lncRNA			0	0	2	5	10	7	0	0	2	3	11	7	3.93	1	7	8.865	3.148	0.0027997	0.00539663	0.2841	0.2465
AT4G20110.2	protein_coding	VSR7, BP80-3;1, VSR3;1	VACUOLAR SORTING RECEPTOR 7, VACUOLAR SORTING RECEPTOR 3;1, binding protein of 80 kDa 3;1	187	182	116	2096	1513	1779	238	196	127	1453	1673	1740	904.42	187	1622	8.867	3.148	8.03646e-55	1.26499e-53	0.0225	0.0136
AT1G59950.1	protein_coding	-	-	7	6	0	47	53	38	9	6	0	33	59	37	23.95	5	43	8.853	3.146	1.2656e-08	3.97351e-08	0.1119	0.092
AT1G53990.1	protein_coding	GLIP3	GDSL-motif lipase 3	4	6	1	58	29	41	5	6	1	40	32	40	20.83	4	37	8.844	3.145	2.46566e-09	8.11566e-09	0.0898	0.0995
AT3G45080.1	protein_coding	-	-	5	2	1	43	16	38	6	2	1	30	18	37	15.71	3	28	8.824	3.141	1.43421e-07	4.17661e-07	0.1088	0.1216
AT3G02895.1	lncRNA			1	2	4	26	27	24	1	2	4	18	30	23	13.19	2	24	8.811	3.139	2.03336e-07	5.85436e-07	0.1009	0.1394
AT5G25930.1	protein_coding	-	-	242	300	209	3000	2628	2596	308	322	228	2079	2906	2540	1397.28	286	2508	8.764	3.132	4.05856e-79	1.05602e-77	0.0155	0.0128
AT3G47210.1	protein_coding	-	-	17	10	8	152	113	125	22	11	9	105	125	122	65.62	14	117	8.761	3.131	8.36669e-19	4.5196e-18	0.0496	0.038
AT4G38540.1	protein_coding	-	-	349	371	318	4090	3587	3765	445	399	347	2834	3966	3683	1945.8	397	3494	8.759	3.131	5.17271e-75	1.24945e-73	0.0168	0.0125
AT1G71150.1	protein_coding	-	-	1	1	0	6	13	5	1	1	0	4	14	5	4.3	1	8	8.752	3.13	0.00118406	0.00239909	0.1957	0.24
AT1G68795.1	protein_coding	CLE12	CLAVATA3/ESR-RELATED 12	13	14	15	187	123	160	17	15	16	130	136	157	78.35	16	141	8.739	3.128	2.3474e-26	1.66859e-25	0.0312	0.0326
AT4G27900.1	protein_coding	-	-	275	371	436	4903	3402	3565	350	399	476	3398	3762	3487	1978.78	408	3549	8.732	3.126	4.49708e-97	1.79185e-95	0.0127	0.0125
AT1G16730.1	protein_coding	UP6	unknown protein 6	48	52	52	680	447	566	61	56	57	471	494	554	282.18	58	506	8.723	3.125	7.70118e-63	1.46537e-61	0.0151	0.0171
AT5G47635.1	protein_coding	-	-	7	16	6	115	94	100	9	17	7	80	104	98	52.36	11	94	8.724	3.125	9.25138e-18	4.79737e-17	0.0483	0.0464
AT1G09240.1	protein_coding	NAS3, ATNAS3	nicotianamine synthase 3, ARABIDOPSIS THALIANA NICOTIANAMINE SYNTHASE 3	493	517	545	6342	4963	5822	628	556	596	4395	5488	5695	2892.95	593	5193	8.713	3.123	4.58412e-90	1.56943e-88	0.014	0.0127
AT3G24420.1	protein_coding	DLK2		28	13	16	226	199	196	36	14	17	157	220	192	105.92	22	190	8.705	3.122	1.46573e-20	8.46017e-20	0.0511	0.0262
AT3G50940.1	protein_coding	-	-	16	4	8	128	81	96	20	4	9	89	90	94	50.94	11	91	8.699	3.121	2.81831e-14	1.2327e-13	0.0681	0.0474
AT5G49630.1	protein_coding	AAP6	amino acid permease 6	270	305	329	4207	2753	3079	344	328	360	2916	3044	3012	1667.17	344	2991	8.701	3.121	8.27497e-107	4.02538e-105	0.0113	0.0126
AT5G03490.1	protein_coding	-	-	51	34	55	574	440	518	65	37	60	398	487	507	258.78	54	464	8.686	3.119	2.03719e-44	2.46463e-43	0.0234	0.0174
AT1G76590.1	protein_coding	-	-	121	146	97	1816	1101	1138	154	157	106	1259	1217	1113	667.71	139	1196	8.68	3.118	3.26825e-87	1.03764e-85	0.0124	0.0144
AT2G13547.1	protein_coding	-	-	0	0	3	8	14	8	0	0	3	6	15	8	5.35	1	10	8.669	3.116	0.00199063	0.0039167	0.3086	0.2205
AT3G26220.1	protein_coding	CYP71B3	"cytochrome P450, family 71, subfamily B, polypeptide 3"	75	77	67	736	773	882	96	83	73	510	855	863	413.19	84	743	8.668	3.116	1.9994e-48	2.67584e-47	0.023	0.0158
AT5G48100.1	protein_coding	ATLAC15, AtTT10, TT10, LAC15	LACCASE-LIKE 15, TRANSPARENT TESTA 10	2	1	0	13	10	13	3	1	0	9	11	13	6.07	1	11	8.669	3.116	0.000225018	0.000495121	0.1861	0.2068
AT5G58780.1	protein_coding	HEPS, cPT5, AtcPT5, AtHEPS	cis -prenyltransferase 5, heptaprenyl diphosphate synthase	15	15	12	180	123	164	19	16	13	125	136	160	78.26	16	140	8.669	3.116	1.45388e-24	9.74517e-24	0.0348	0.0327
AT4G02950.1	protein_coding	-	-	0	1	0	7	2	6	0	1	0	5	2	6	2.33	0	4	8.65	3.113	0.00932659	0.0166353	0.2977	0.2775
AT3G01475.1	protein_coding	-	-	4	5	2	29	59	31	5	5	2	20	65	30	21.39	4	38	8.638	3.111	2.42973e-09	8.00385e-09	0.0811	0.1023
AT2G22880.1	protein_coding	VQ12		21	17	11	189	159	187	27	18	12	131	176	183	91.13	19	163	8.633	3.11	5.41533e-22	3.31594e-21	0.044	0.0292
at1g04993	miRNA			1	0	0	5	5	4	1	0	0	3	6	4	2.36	0	4	8.625	3.108	0.00876308	0.0157053	0.2953	0.2816
AT4G28350.1	protein_coding	LecRK-VII.2	L-type lectin receptor kinase VII.2	25	21	17	251	226	209	32	23	19	174	250	204	116.88	25	209	8.609	3.106	1.52377e-28	1.16579e-27	0.0329	0.0246
AT5G04980.3	protein_coding	-	-	75	70	54	879	648	647	96	75	59	609	717	633	364.74	77	653	8.601	3.105	1.10468e-61	2.0463e-60	0.0165	0.0161
AT2G21188.1	ncRNA		other RNA	20	4	24	154	146	187	25	4	26	107	161	183	84.52	18	150	8.598	3.104	6.08587e-14	2.61166e-13	0.0801	0.031
AT4G22217.1	protein_coding	-	-	1	0	1	8	4	13	1	0	1	6	4	13	4.18	1	8	8.599	3.104	0.00112695	0.00228901	0.1893	0.2375
AT5G38310.1	protein_coding	-	-	5	0	2	27	26	23	6	0	2	19	29	22	13.09	3	23	8.601	3.104	1.05002e-05	2.63315e-05	0.1732	0.1404
AT1G07128.1	lncRNA		Potential natural antisense gene, locus overlaps with AT1G07130	26	29	24	319	247	293	33	31	26	221	273	287	145.22	30	260	8.592	3.103	6.96498e-38	7.05349e-37	0.0236	0.0217
AT2G34655.1	protein_coding	-	-	5	6	2	51	38	55	6	6	2	35	42	54	24.36	5	44	8.592	3.103	2.61219e-10	9.17794e-10	0.079	0.0897
AT5G25450.1	protein_coding	-	-	22	27	31	306	244	310	28	29	34	212	270	303	146.01	30	262	8.586	3.102	1.44095e-40	1.57749e-39	0.0212	0.0217
AT2G36270.3	protein_coding	DPBF1, AtABI5, GIA1, ABI5	ABA INSENSITIVE 5, GROWTH-INSENSITIVITY TO ABA 1	10	11	17	206	101	122	13	12	19	143	112	119	69.49	15	125	8.565	3.099	8.12479e-23	5.13347e-22	0.0364	0.0357
AT3G02455.3	lncRNA			2	0	0	11	8	5	3	0	0	8	9	5	3.98	1	7	8.555	3.097	0.00237946	0.00463577	0.2672	0.2408
AT1G13510.1	protein_coding	-	-	10	4	12	99	69	112	13	4	13	69	76	110	47.44	10	85	8.55	3.096	3.7243e-16	1.78653e-15	0.0521	0.0507
AT5G63850.1	protein_coding	AAP4	amino acid permease 4	722	783	830	10037	7214	8067	920	841	907	6956	7977	7892	4248.79	889	7608	8.544	3.095	1.9419e-98	8.01135e-97	0.0128	0.0134
AT1G34180.4	protein_coding	anac016, NAC016	NAC domain containing protein 16	48	58	30	504	444	494	61	62	33	349	491	483	246.63	52	441	8.536	3.094	2.51641e-37	2.521e-36	0.0284	0.0177
AT5G04425.1	snoRNA			59	56	70	552	553	919	75	60	76	383	611	899	350.82	70	631	8.539	3.094	1.38197e-43	1.62895e-42	0.0248	0.0163
AT1G16160.1	protein_coding	WAKL5	wall associated kinase-like 5	3	4	0	34	17	28	4	4	0	24	19	27	12.98	3	23	8.504	3.088	2.22961e-06	5.92762e-06	0.1358	0.1382
AT4G05775.1	lncRNA			1	0	1	10	9	6	1	0	1	7	10	6	4.19	1	8	8.499	3.087	0.00109719	0.00223083	0.2014	0.2376
AT4G16620.2	protein_coding	UMAMIT8	Usually multiple acids move in and out Transporters 8	11	12	23	204	123	165	14	13	25	141	136	161	81.81	17	146	8.495	3.087	3.17603e-25	2.17397e-24	0.0335	0.0314
AT5G41380.1	protein_coding	-	-	9	5	7	100	54	80	11	5	8	69	60	78	38.63	8	69	8.498	3.087	3.55031e-15	1.61709e-14	0.0513	0.0603
AT4G03620.2	protein_coding	-	-	0	0	1	8	0	7	0	0	1	6	0	7	2.25	0	4	8.491	3.086	0.0134192	0.0233353	0.2702	0.2777
AT1G73410.2	protein_coding	ATMYB54, MYB54	ARABIDOPSIS THALIANA MYB DOMAIN PROTEIN 54, myb domain protein 54	3	7	11	79	65	73	4	8	12	55	72	71	36.9	8	66	8.486	3.085	2.51763e-14	1.10325e-13	0.0555	0.0634
AT1G20310.1	protein_coding	-	-	5	6	1	21	53	58	6	6	1	15	59	57	23.97	4	44	8.477	3.084	2.00914e-07	5.78701e-07	0.1283	0.0941
AT2G25890.2	protein_coding	-	-	3	2	4	74	19	23	4	2	4	51	21	22	17.52	3	31	8.481	3.084	1.06556e-08	3.36283e-08	0.08	0.1093
AT2G30840.3	protein_coding	-	-	35	32	42	414	342	407	45	34	46	287	378	398	198.02	42	354	8.481	3.084	4.23469e-44	5.07274e-43	0.0211	0.019
AT4G23493.1	protein_coding	-	-	10	20	8	144	92	172	13	21	9	100	102	168	68.79	14	123	8.453	3.079	1.39686e-16	6.83314e-16	0.0582	0.0364
AT1G74080.1	protein_coding	ATMYB122, MYB122	MYB DOMAIN PROTEIN 122, myb domain protein 122	6	4	5	49	69	45	8	4	5	34	76	44	28.61	6	51	8.435	3.076	6.45134e-11	2.34717e-10	0.0747	0.0802
AT3G02800.1	protein_coding	PFA-DSP3, AtPFA-DSP3	plant and fungi atypical dual-speci&#64257;city phosphatase 3	11	23	22	182	183	207	14	25	24	126	202	202	98.96	21	177	8.433	3.076	1.44029e-30	1.18038e-29	0.0265	0.0275
AT5G38344.1	protein_coding	-	-	8	12	4	78	69	109	10	13	4	54	76	107	44.07	9	79	8.427	3.075	4.09645e-13	1.67984e-12	0.0695	0.0545
AT1G62760.1	protein_coding	-	-	9	7	10	92	90	94	11	8	11	64	100	92	47.52	10	85	8.41	3.072	8.61993e-17	4.2546e-16	0.048	0.051
AT1G74460.1	protein_coding	-	-	136	126	75	1330	965	1242	173	135	82	922	1067	1215	599.07	130	1068	8.407	3.072	6.9446e-40	7.45386e-39	0.0296	0.0147
AT1G04490.4	protein_coding	-	-	15	9	12	143	129	114	19	10	13	99	143	112	65.86	14	118	8.405	3.071	3.26517e-19	1.79607e-18	0.0459	0.038
AT2G21590.4	protein_coding	APL4		292	380	348	6373	2458	2932	372	408	380	4417	2718	2868	1860.58	387	3334	8.398	3.07	1.07774e-67	2.2717e-66	0.018	0.0125
AT3G53230.1	protein_coding	AtCDC48B	cell division cycle 48B	214	247	201	3065	1732	2379	273	265	220	2124	1915	2327	1187.38	253	2122	8.398	3.07	4.96615e-84	1.47148e-82	0.0138	0.013
AT4G26060.1	protein_coding	-	-	73	66	94	867	785	798	93	71	103	601	868	781	419.36	89	750	8.399	3.07	8.35548e-58	1.39947e-56	0.0181	0.0157
AT5G13750.1	protein_coding	ZIFL1	zinc induced facilitator-like 1	347	455	307	4882	3267	3600	442	489	335	3383	3612	3522	1964.02	422	3506	8.385	3.068	9.89446e-88	3.19582e-86	0.0137	0.0125
AT1G16120.1	protein_coding	WAKL1	wall associated kinase-like 1	9	1	3	56	30	49	11	1	3	39	33	48	22.62	5	40	8.37	3.065	3.21486e-08	9.80818e-08	0.1125	0.0944
AT2G47710.1	protein_coding	-	-	765	824	839	9231	7628	8781	975	886	917	6397	8435	8590	4366.51	926	7807	8.37	3.065	1.25353e-80	3.39752e-79	0.0155	0.0134
AT3G05860.2	protein_coding	-	-	0	2	0	11	5	7	0	2	0	8	6	7	3.69	1	7	8.367	3.065	0.00319116	0.00609866	0.2819	0.2441
AT3G13610.1	protein_coding	F6'H1		189	164	101	1413	1645	1591	241	176	110	979	1819	1556	813.67	176	1451	8.368	3.065	9.31526e-29	7.18184e-28	0.0426	0.0138
AT5G65575.3	lncRNA		other RNA	1	2	0	17	7	12	1	2	0	12	8	12	5.78	1	11	8.361	3.064	0.000295844	0.000642074	0.1822	0.2074
AT1G65810.3	protein_coding	-	-	2	0	0	13	7	4	3	0	0	9	8	4	3.87	1	7	8.359	3.063	0.00250583	0.00486604	0.2497	0.2411
AT3G11010.1	protein_coding	RLP34, AtRLP34	receptor like protein 34	96	147	101	1662	932	1091	122	158	110	1152	1031	1067	606.72	130	1083	8.349	3.062	7.49279e-75	1.80829e-73	0.0142	0.0146
AT3G48300.2	protein_coding	CYP71A23	"cytochrome P450, family 71, subfamily A, polypeptide 23"	3	3	3	41	34	24	4	3	3	28	38	23	16.64	3	30	8.354	3.062	8.46999e-09	2.69496e-08	0.0778	0.1187
AT1G26420.1	protein_coding	AtBBE7		13	15	11	133	152	122	17	16	12	92	168	119	70.72	15	126	8.344	3.061	6.87321e-22	4.19303e-21	0.0377	0.0359
AT3G05080.1	protein_coding	-	-	0	0	2	9	3	10	0	0	2	6	3	10	3.59	1	6	8.342	3.06	0.00283374	0.00545661	0.2389	0.2472
AT4G21920.1	protein_coding	-	-	2	1	3	29	18	20	3	1	3	20	20	20	11.08	2	20	8.339	3.06	1.3395e-06	3.62633e-06	0.1073	0.1524
AT2G26692.1	lncRNA		other RNA	5	1	2	20	28	40	6	1	2	14	31	39	15.6	3	28	8.332	3.059	6.00807e-06	1.54063e-05	0.1618	0.1272
AT4G27745.1	protein_coding	-	-	81	139	121	1196	1011	1301	103	149	132	829	1118	1273	600.71	128	1073	8.331	3.059	9.95571e-85	2.99754e-83	0.0121	0.0147
AT1G22220.1	protein_coding	AUF2	auxin up-regulated f-box protein 2	14	22	15	198	148	188	18	24	16	137	164	184	90.44	19	162	8.33	3.058	4.36717e-27	3.18027e-26	0.0307	0.0292
AT5G05135.1	lncRNA			0	0	1	6	6	2	0	0	1	4	7	2	2.31	0	4	8.327	3.058	0.0118839	0.020843	0.3147	0.2817
AT1G28470.1	protein_coding	NAC010, SND3, ANAC010	NAC domain containing protein 10, SECONDARY WALL-ASSOCIATED NAC DOMAIN PROTEIN 3	15	26	19	208	186	222	19	28	21	144	206	217	105.8	23	189	8.309	3.055	1.36078e-30	1.1162e-29	0.0272	0.0262
AT5G09530.1	protein_coding	PRP10, PELPK1	Pro-Glu-Leu	245	194	191	2955	1702	2090	312	208	209	2048	1882	2045	1117.3	243	1992	8.313	3.055	2.53512e-82	7.1771e-81	0.0139	0.0131
AT5G24600.1	protein_coding	-	-	10	8	10	129	83	90	13	9	11	89	92	88	50.25	11	90	8.312	3.055	1.37771e-18	7.38658e-18	0.0414	0.0478
AT4G36830.2	protein_coding	HOS3-1		12	17	17	245	131	129	15	18	19	170	145	126	82.16	17	147	8.305	3.054	1.35025e-25	9.36008e-25	0.0319	0.0312
AT4G02940.1	protein_coding	-	-	668	856	708	10632	6082	7119	851	920	774	7368	6725	6964	3933.72	848	7019	8.286	3.051	1.37949e-97	5.54392e-96	0.0126	0.0132
AT5G43840.1	protein_coding	HSFA6A, AT-HSFA6A	heat shock transcription factor A6A	0	0	1	11	1	4	0	0	1	8	1	4	2.29	0	4	8.278	3.049	0.0122391	0.021427	0.2786	0.2738
AT5G64230.1	protein_coding	-	-	71	84	88	843	773	898	90	90	96	584	855	878	432.39	92	772	8.276	3.049	2.91336e-70	6.46743e-69	0.014	0.0156
AT3G60580.1	protein_coding	-	-	21	29	25	259	259	251	27	31	27	179	286	246	132.78	28	237	8.262	3.047	5.2454e-36	5.07152e-35	0.0234	0.0228
AT5G58540.3	protein_coding	-	-	21	33	13	318	174	212	27	35	14	220	192	207	116.1	25	206	8.263	3.047	7.70968e-26	5.39253e-25	0.0366	0.0245
AT4G15280.2	protein_coding	UGT71B5	UDP-glucosyl transferase 71B5	3	12	3	81	41	61	4	13	3	56	45	60	30.19	7	54	8.259	3.046	1.01318e-09	3.42557e-09	0.0956	0.0741
AT5G58680.1	protein_coding	-	-	4	9	2	68	35	56	5	10	2	47	39	55	26.26	6	47	8.26	3.046	1.10706e-09	3.7317e-09	0.0897	0.0833
AT5G09540.1	protein_coding	-	-	13	21	26	215	174	221	17	23	28	149	192	216	104.19	23	186	8.246	3.044	2.59511e-31	2.17524e-30	0.0258	0.0265
AT4G34590.1	protein_coding	BZIP11, ATB2, GBF6, AtbZIP11	Arabidopsis thaliana basic leucine-zipper 11, G-box binding factor 6	447	742	506	7191	4765	5485	570	797	553	4983	5269	5366	2923.01	640	5206	8.235	3.042	2.32139e-84	6.92972e-83	0.0144	0.0127
AT2G29490.1	protein_coding	GSTU1, ATGSTU1, GST19	GLUTATHIONE S-TRANSFERASE 19, glutathione S-transferase TAU 1	148	284	132	1879	1910	1753	189	305	144	1302	2112	1715	961.18	213	1710	8.22	3.039	4.01993e-65	8.04303e-64	0.0175	0.0135
AT5G37550.1	protein_coding	-	-	10	4	5	72	60	67	13	4	5	50	66	66	34.05	7	61	8.216	3.038	1.94999e-11	7.29966e-11	0.0765	0.0683
AT5G02420.1	protein_coding	SMR3		26	34	40	334	291	394	33	37	44	231	322	385	175.34	38	313	8.204	3.036	8.66057e-44	1.02516e-42	0.0195	0.0199
AT5G14640.1	protein_coding	SK13, ATSK13	shaggy-like kinase 13, SHAGGY-LIKE KINASE 13	362	496	508	6257	3884	4150	461	533	555	4336	4295	4060	2373.35	516	4230	8.201	3.036	4.78169e-98	1.95539e-96	0.0121	0.0125
AT5G37690.2	protein_coding	-	-	109	99	83	1168	866	991	139	106	91	809	958	969	512.08	112	912	8.201	3.036	5.73684e-61	1.04469e-59	0.0174	0.0151
AT1G23040.1	protein_coding	-	-	44	53	51	626	423	495	56	57	56	434	468	484	259.09	56	462	8.197	3.035	7.00763e-58	1.17724e-56	0.0154	0.0174
AT1G67623.1	protein_coding	-	-	0	1	2	12	9	11	0	1	2	8	10	11	5.38	1	10	8.187	3.033	0.000329922	0.000712386	0.1725	0.2162
AT3G51890.1	protein_coding	CLC3	clathrin light chain 3	109	81	86	989	920	930	139	87	94	685	1017	910	488.73	107	871	8.184	3.033	4.33701e-44	5.19086e-43	0.0251	0.0153
AT2G05075.1	lncRNA			1	0	1	6	8	9	1	0	1	4	9	9	4.03	1	7	8.179	3.032	0.00157632	0.00314451	0.2061	0.2434
AT2G05518.1	ncRNA		Unknown gene	29	13	32	270	215	266	37	14	35	187	238	260	128.49	29	228	8.179	3.032	5.25202e-24	3.45901e-23	0.0414	0.0232
AT3G23920.1	protein_coding	BMY7, AtBAM1, BAM1, TR-BAMY	beta-amylase 1, BETA-AMYLASE 7	561	673	684	9579	4679	6288	715	723	747	6638	5174	6151	3358.17	728	5988	8.174	3.031	1.29382e-95	4.94392e-94	0.0126	0.0129
AT1G74650.2	protein_coding	ATY13, MYB31, ATMYB31	ARABIDOPSIS THALIANA MYB DOMAIN PROTEIN 31, myb domain protein 31	67	84	67	997	616	673	85	90	73	691	681	658	379.88	83	677	8.164	3.029	4.17691e-74	9.97714e-73	0.0125	0.016
AT5G49340.1	protein_coding	TBL4	TRICHOME BIREFRINGENCE-LIKE 4	0	0	2	12	3	8	0	0	2	8	3	8	3.61	1	6	8.161	3.029	0.00325781	0.00621924	0.2518	0.2443
AT4G23700.2	protein_coding	ATCHX17, CHX17	cation/H+ exchanger 17	10	31	20	181	255	154	13	33	22	125	282	151	104.33	23	186	8.157	3.028	1.01308e-29	8.07314e-29	0.0269	0.0266
AT1G77570.1	protein_coding	REN1, AtREN1	restricted to nucleolus 1	37	62	35	496	367	495	47	67	38	344	406	484	230.97	51	411	8.132	3.024	1.71245e-39	1.81918e-38	0.0248	0.018
AT1G02770.1	protein_coding	-	-	18	16	25	265	159	192	23	17	27	184	176	188	102.46	22	183	8.127	3.023	8.60162e-30	6.87613e-29	0.0275	0.0266
AT3G02025.1	lncRNA			1	2	0	13	15	4	1	2	0	9	17	4	5.49	1	10	8.126	3.023	0.000396766	0.000848726	0.1597	0.216
AT5G41750.2	protein_coding	-	-	150	121	149	1487	1398	1405	191	130	163	1031	1546	1374	739.13	161	1317	8.122	3.022	3.83267e-51	5.48076e-50	0.0222	0.0141
AT1G49832.2	ncRNA			4	5	8	74	49	54	5	5	9	51	54	53	29.58	6	53	8.117	3.021	1.32415e-12	5.28958e-12	0.0578	0.076
AT1G61160.1	protein_coding	-	-	0	2	0	10	9	2	0	2	0	7	10	2	3.5	1	6	8.112	3.02	0.00394768	0.00744625	0.2439	0.2505
AT3G25290.1	protein_coding	-	-	155	144	120	1482	1245	1563	198	155	131	1027	1377	1529	736.02	161	1311	8.113	3.02	2.17577e-49	2.98765e-48	0.023	0.0141
AT4G14305.2	protein_coding	-	-	20	9	23	182	168	174	25	10	25	126	186	170	90.4	20	161	8.099	3.018	4.46325e-19	2.43688e-18	0.0506	0.0294
AT4G28110.2	protein_coding	MYB41, AtMYB41	myb domain protein 41	4	1	0	21	18	12	5	1	0	15	20	12	8.73	2	16	8.103	3.018	0.000109876	0.000249723	0.1928	0.1754
AT5G42010.2	protein_coding	-	-	59	67	79	844	626	631	75	72	86	585	692	617	354.65	78	631	8.098	3.018	1.80884e-67	3.7899e-66	0.0138	0.0162
AT4G20000.1	protein_coding	-	-	11	18	10	114	122	154	14	19	11	79	135	151	68.14	15	122	8.083	3.015	7.41341e-20	4.16554e-19	0.0418	0.0371
AT5G05320.1	protein_coding	-	-	23	25	26	315	199	248	29	27	28	218	220	243	127.59	28	227	8.026	3.005	1.56251e-35	1.48859e-34	0.0229	0.0232
AT3G52510.2	protein_coding	-	-	0	0	1	1	5	5	0	0	1	1	6	5	2.03	0	4	8.015	3.003	0.0177688	0.0302484	0.3132	0.2958
AT5G48175.1	protein_coding	-	-	6	0	1	26	26	14	8	0	1	18	29	14	11.53	3	20	8.017	3.003	0.000164791	0.000367543	0.2323	0.1517
AT1G11785.1	protein_coding	-	-	4	3	1	31	21	33	5	3	1	21	23	32	14.4	3	25	8.014	3.002	5.26702e-07	1.46937e-06	0.1106	0.131
AT3G18570.1	protein_coding	-	-	0	2	0	7	6	7	0	2	0	5	7	7	3.41	1	6	8.005	3.001	0.00420859	0.00790641	0.2786	0.2537
AT5G44550.1	protein_coding	CASPL1B1	CASP-like protein 1B1	218	172	170	2009	1641	1995	278	185	186	1392	1815	1952	967.8	216	1720	8.006	3.001	3.09929e-49	4.23914e-48	0.0234	0.0134
AT5G61850.2	protein_coding	LFY3, LFY	LEAFY, LEAFY 3	1	0	0	5	5	3	1	0	0	3	6	3	2.2	0	4	7.998	3	0.0127785	0.0223071	0.3043	0.2863
AT4G19720.1	protein_coding	-	-	16	13	11	123	124	160	20	14	12	85	137	157	70.88	15	126	7.992	2.999	7.90101e-18	4.10627e-17	0.0501	0.0358
AT5G13900.1	protein_coding	-	-	10	15	6	119	79	117	13	16	7	82	87	114	53.28	12	94	7.994	2.999	1.19001e-15	5.55598e-15	0.0549	0.0456
AT1G02405.1	protein_coding	-	-	0	1	4	14	13	19	0	1	4	10	14	19	8.02	2	14	7.99	2.998	6.75657e-05	0.000156876	0.1592	0.1833
at5g01745	miRNA			0	0	1	3	1	8	0	0	1	2	1	8	2.02	0	4	7.989	2.998	0.0185106	0.0314098	0.2891	0.2911
AT5G58910.2	protein_coding	LAC16	laccase 16	5	3	5	54	42	39	6	3	5	37	46	38	22.85	5	40	7.984	2.997	2.16979e-10	7.6582e-10	0.0683	0.0942
AT3G58150.1	protein_coding	-	-	5	8	6	65	61	63	6	9	7	45	67	62	32.61	7	58	7.969	2.994	1.51911e-13	6.37813e-13	0.0522	0.071
AT1G69870.1	protein_coding	NRT1.7, AtNPF2.13, NPF2.13	nitrate transporter 1.7, NRT1/ PTR family 2.13	1272	1887	1348	18928	12201	14109	1621	2028	1473	13117	13491	13802	7588.77	1707	13470	7.958	2.992	4.3656e-76	1.07871e-74	0.016	0.0152
AT2G27310.1	protein_coding	-	-	32	18	11	243	151	212	41	19	12	168	167	207	102.48	24	181	7.958	2.992	4.16674e-18	2.19199e-17	0.0555	0.0267
AT5G38910.1	protein_coding	-	-	1	1	0	8	6	9	1	1	0	6	7	9	3.89	1	7	7.957	2.992	0.00173794	0.00344741	0.2037	0.2437
AT1G61050.2	protein_coding	-	-	40	42	27	399	309	386	51	45	30	277	342	378	186.9	42	332	7.942	2.99	8.82567e-34	8.00203e-33	0.0282	0.0194
AT1G67365.1	lncRNA		other RNA	29	38	27	371	247	331	37	41	30	257	273	324	160.22	36	285	7.931	2.988	4.78798e-37	4.75584e-36	0.0235	0.0207
AT5G17460.3	protein_coding	-	-	105	139	134	1857	994	1068	134	149	146	1287	1099	1045	643.4	143	1144	7.936	2.988	6.68655e-81	1.8229e-79	0.0125	0.0145
at1g09817	miRNA			0	0	4	4	19	10	0	0	4	3	21	10	6.32	1	11	7.931	2.987	0.00382853	0.00723663	0.3322	0.2101
AT1G07600.1	protein_coding	MT-Q, MT1, ATMT-Q, ATMT-2, ATMT1, LSR4, MT1A	metallothionein 1A, ARABIDOPSIS METALLOTHIONEIN 1, METALLOTHIONEIN 1, LIGHT STRESS-REGULATED 4, METALLOTHIONEIN Q, METALLOTHIONEIN 2	568	557	411	5548	4505	5167	724	599	449	3845	4981	5055	2608.73	591	4627	7.914	2.984	1.35919e-53	2.06395e-52	0.0222	0.0126
AT3G57690.1	protein_coding	AGP23, ATAGP23	ARABINOGALACTAN-PROTEIN 23, arabinogalactan protein 23	0	1	0	3	7	1	0	1	0	2	8	1	1.98	0	4	7.914	2.984	0.0202516	0.0341218	0.2957	0.296
AT2G36090.1	protein_coding	-	-	17	22	13	236	130	167	22	24	14	164	144	163	88.36	20	157	7.903	2.982	4.02822e-25	2.74813e-24	0.0325	0.0296
AT3G14050.1	protein_coding	AT-RSH2, ATRSH2, RSH2	RELA-SPOT HOMOLOG 2, RELA/SPOT homolog 2, RELA/SPOT HOMOLOG 2	598	727	675	8931	5428	5965	762	781	738	6189	6002	5835	3384.59	760	6009	7.902	2.982	2.38587e-103	1.08337e-101	0.0113	0.0129
AT1G70800.1	protein_coding	EHB1, CAR6	C2-domain ABA-related6, ENHANCED BENDING 1	32	56	49	566	350	452	41	60	54	392	387	442	229.32	52	407	7.897	2.981	1.05222e-47	1.37982e-46	0.0187	0.018
AT1G03070.1	protein_coding	AtLFG4, LFG4	LIFEGUARD 4	3	9	5	95	37	50	4	10	5	66	41	49	29.1	6	52	7.891	2.98	8.60836e-11	3.1081e-10	0.0738	0.0755
AT2G30750.1	protein_coding	CYP71A12	cytochrome P450, family 71, subfamily A, polypeptide 12	8	13	12	145	138	60	10	14	13	100	153	59	58.18	12	104	7.892	2.98	3.65479e-17	1.84328e-16	0.0467	0.0423
AT3G03760.1	protein_coding	LBD20	LOB domain-containing protein 20	2	0	0	7	4	12	3	0	0	5	4	12	3.93	1	7	7.89	2.98	0.00579072	0.0106505	0.3251	0.2436
AT1G45145.1	protein_coding	TRX-h5, ATTRX5, LIV1, ATH5, TRX5	thioredoxin H-type 5, THIOREDOXIN H-TYPE 5, LOCUS OF INSENSITIVITY TO VICTORIN 1	256	184	140	1738	1816	2043	326	198	153	1204	2008	1999	981.33	226	1737	7.884	2.979	4.91164e-26	3.45619e-25	0.0454	0.0134
AT2G48140.1	protein_coding	EDA4	embryo sac development arrest 4	43	36	27	411	276	381	55	39	30	285	305	373	180.95	41	321	7.887	2.979	7.24424e-32	6.17394e-31	0.03	0.0196
AT4G36010.1	protein_coding	-	-	225	233	150	2605	1618	1857	287	250	164	1805	1789	1817	1018.67	234	1804	7.876	2.978	1.82959e-65	3.69499e-64	0.017	0.0133
AT4G38870.1	protein_coding	-	-	5	3	3	44	34	35	6	3	3	30	38	34	19.2	4	34	7.878	2.978	4.69694e-09	1.51988e-08	0.0782	0.1075
AT1G78780.1	protein_coding	-	-	49	50	38	506	391	469	62	54	42	351	432	459	233.25	53	414	7.875	2.977	2.23418e-41	2.5007e-40	0.0228	0.018
AT5G65230.1	protein_coding	MYB53, AtMYB53	myb domain protein 53	15	14	11	147	121	132	19	15	12	102	134	129	68.5	15	122	7.876	2.977	6.72418e-21	3.93889e-20	0.0382	0.0367
AT2G46440.2	protein_coding	ATCNGC11, CNGC11	CYCLIC NUCLEOTIDE-GATED CHANNEL 11, cyclic nucleotide-gated channel 11	275	279	283	3464	2339	2588	350	300	309	2401	2586	2532	1413.03	320	2506	7.848	2.972	5.51518e-92	1.9552e-90	0.012	0.0128
AT1G17030.1	protein_coding	-	-	8	18	10	126	103	117	10	19	11	87	114	114	59.36	13	105	7.818	2.967	3.42489e-19	1.88207e-18	0.0404	0.0416
AT3G54310.1	protein_coding	-	-	2	3	1	22	14	27	3	3	1	15	15	26	10.67	2	19	7.818	2.967	6.81682e-06	1.73734e-05	0.123	0.1569
AT2G35945.1	lncRNA		other RNA	41	33	18	369	250	284	52	35	20	256	276	278	152.89	36	270	7.809	2.965	1.02612e-26	7.37261e-26	0.0361	0.0212
AT5G18270.2	protein_coding	ANAC087	Arabidopsis NAC domain containing protein 87	87	89	80	926	724	879	111	96	87	642	801	860	432.68	98	768	7.803	2.964	5.65677e-61	1.03079e-59	0.016	0.0156
AT1G35330.1	protein_coding	-	-	17	7	1	82	50	91	22	8	1	57	55	89	38.57	10	67	7.777	2.959	4.70142e-07	1.31661e-06	0.1549	0.0611
AT4G06945.1	lncRNA			3	1	1	15	16	21	4	1	1	10	18	21	9.1	2	16	7.776	2.959	5.06148e-05	0.000118771	0.1581	0.1733
AT5G34780.1	protein_coding	-	-	8	6	1	61	36	52	10	6	1	42	40	51	25.11	6	44	7.771	2.958	1.01091e-08	3.19649e-08	0.0994	0.0871
AT5G39150.1	protein_coding	-	-	5	5	2	37	33	51	6	5	2	26	36	50	20.99	4	37	7.77	2.958	1.73693e-08	5.40718e-08	0.0922	0.1015
AT5G13820.1	protein_coding	TBP1, ATBP-1, ATBP1, ATTBP1, HPPBF-1	telomeric DNA binding protein 1, H-PROTEIN PROMOTE	106	95	108	1141	889	1007	135	102	118	791	983	985	519	118	920	7.764	2.957	2.49905e-65	5.02522e-64	0.0152	0.0151
AT2G36970.1	protein_coding	-	-	235	303	263	3512	2251	2204	299	326	287	2434	2489	2156	1331.91	304	2360	7.749	2.954	1.59602e-98	6.59412e-97	0.0109	0.0129
AT3G60690.1	protein_coding	SAUR59	SMALL AUXIN UPREGULATED RNA 59	175	211	188	2167	1637	1817	223	227	205	1502	1810	1777	957.43	218	1696	7.751	2.954	7.27335e-88	2.36561e-86	0.0119	0.0135
AT1G25370.2	protein_coding	-	-	51	52	58	621	458	503	65	56	63	430	506	492	268.85	61	476	7.746	2.953	3.78853e-54	5.86437e-53	0.0163	0.0173
AT1G28570.1	protein_coding	-	-	138	106	146	1688	1066	1120	176	114	160	1170	1179	1096	648.91	150	1148	7.742	2.953	2.19554e-69	4.79028e-68	0.0147	0.0144
AT1G52800.1	protein_coding	-	-	17	22	20	236	193	152	22	24	22	164	213	149	98.8	23	175	7.739	2.952	1.26969e-28	9.74599e-28	0.0271	0.0274
AT3G26500.1	protein_coding	PIRL2	plant intracellular ras group-related LRR 2	48	33	38	408	388	366	61	35	42	283	429	358	201.33	46	357	7.741	2.952	4.53294e-30	3.65919e-29	0.0326	0.0189
AT5G09210.1	protein_coding	-	-	0	0	2	10	3	8	0	0	2	7	3	8	3.38	1	6	7.736	2.952	0.00455945	0.0085118	0.2575	0.2507
AT1G67150.4	protein_coding	-	-	6	2	1	16	35	40	8	2	1	11	39	39	16.63	4	30	7.72	2.949	8.93297e-05	0.000205227	0.2191	0.1232
AT4G26390.1	protein_coding	-	-	1	0	1	7	8	7	1	0	1	5	9	7	3.82	1	7	7.722	2.949	0.00221404	0.00433373	0.21	0.2467
AT5G42050.1	protein_coding	-	-	1786	1961	1779	22468	15541	16401	2276	2107	1944	15571	17184	16044	9187.79	2109	16266	7.722	2.949	1.45647e-79	3.83606e-78	0.0149	0.0159
AT1G22065.1	protein_coding	-	-	21	19	7	173	121	160	27	20	8	120	134	157	77.51	18	137	7.714	2.947	5.6822e-16	2.69887e-15	0.0594	0.033
AT2G34720.1	protein_coding	NF-YA4	"nuclear factor Y, subunit A4"	301	312	368	4195	2691	2810	384	335	402	2907	2976	2749	1625.44	374	2877	7.711	2.947	2.54045e-89	8.5305e-88	0.0123	0.0126
AT5G58650.1	protein_coding	PSY1	plant peptide containing sulfated tyrosine 1	56	81	97	772	623	838	71	87	106	535	689	820	384.68	88	681	7.713	2.947	5.82285e-73	1.35839e-71	0.012	0.016
AT3G26770.1	protein_coding	-	-	23	15	17	187	142	213	29	16	19	130	157	208	93.16	21	165	7.702	2.945	2.39878e-21	1.43368e-20	0.0412	0.0287
AT1G69890.1	protein_coding	-	-	147	186	161	1707	1543	1502	187	200	176	1183	1706	1469	820.27	188	1453	7.678	2.941	4.87645e-80	1.29904e-78	0.0128	0.0138
AT4G20170.1	protein_coding	GALS3	galactan synthase 3	304	389	336	5265	2504	2730	387	418	367	3649	2769	2671	1710.12	391	3030	7.675	2.94	9.09399e-82	2.52349e-80	0.0136	0.0126
AT3G20250.2	protein_coding	APUM5, PUM5	pumilio 5	391	437	403	5807	2975	3574	498	470	440	4024	3290	3496	2036.41	469	3603	7.656	2.937	4.40808e-98	1.80525e-96	0.0113	0.0125
AT4G18210.1	protein_coding	PUP10, ATPUP10	purine permease 10	74	76	72	763	682	696	94	82	79	529	754	681	369.73	85	655	7.658	2.937	7.72867e-57	1.2694e-55	0.0165	0.0161
AT5G53110.1	protein_coding	-	-	47	46	34	468	349	416	60	49	37	324	386	407	210.61	49	372	7.656	2.937	7.17657e-38	7.26514e-37	0.0242	0.0186
AT3G48240.1	protein_coding	-	-	6	16	12	145	89	95	8	17	13	100	98	93	54.96	13	97	7.643	2.934	1.8146e-17	9.2756e-17	0.0445	0.0441
AT1G34420.1	protein_coding	-	-	41	38	37	439	319	369	52	41	40	304	353	361	191.91	44	339	7.63	2.932	3.1718e-41	3.5346e-40	0.0208	0.0192
AT5G24900.2	protein_coding	CYP714A2, ELA2	EUI-like p450 A2, cytochrome P450, family 714, subfamily A, polypeptide 2	0	1	2	16	12	5	0	1	2	11	13	5	5.42	1	10	7.633	2.932	0.000916944	0.001882	0.2075	0.2141
AT5G45080.1	protein_coding	PP2-A6, AtPP2-A6	phloem protein 2-A6	15	6	5	113	58	83	19	6	5	78	64	81	42.44	10	74	7.634	2.932	1.0686e-12	4.29266e-12	0.0661	0.0555
AT5G05280.1	protein_coding	DAF	DEFECTIVE IN ANTHER DEHISCENCE1- ( DAD1-) Activating Factor	0	0	1	3	3	5	0	0	1	2	3	5	1.9	0	3	7.626	2.931	0.0178809	0.0304299	0.3012	0.2962
AT5G17050.1	protein_coding	UGT78D2	UDP-glucosyl transferase 78D2	346	280	332	4269	2422	2756	441	301	363	2958	2678	2696	1572.88	368	2777	7.615	2.929	7.68742e-87	2.40789e-85	0.0126	0.0127
AT1G15670.1	protein_coding	KFB01, KMD2	Kelch repeat F-box 1, KISS ME DEADLY 2	217	252	158	1946	1939	2037	277	271	173	1349	2144	1993	1034.22	240	1829	7.612	2.928	1.78971e-45	2.2239e-44	0.0245	0.0133
AT5G01250.1	protein_coding	-	-	33	45	44	393	334	432	42	48	48	272	369	423	200.46	46	355	7.613	2.928	1.45568e-44	1.76416e-43	0.0187	0.0189
AT1G06830.1	protein_coding	-	-	183	232	178	2056	1613	2007	233	249	195	1425	1784	1963	974.8	226	1724	7.604	2.927	6.09812e-69	1.31918e-67	0.0154	0.0134
AT5G10946.2	protein_coding	-	-	39	31	29	354	274	328	50	33	32	245	303	321	163.98	38	290	7.604	2.927	1.09623e-31	9.30018e-31	0.0284	0.0205
AT3G04660.1	protein_coding	-	-	1	0	1	5	11	6	1	0	1	3	12	6	3.98	1	7	7.6	2.926	0.00324153	0.00618941	0.234	0.2464
AT5G40240.3	protein_coding	UMAMIT40	Usually multiple acids move in and out Transporters 40	288	336	332	3545	2634	3002	367	361	363	2457	2913	2937	1566.15	364	2769	7.592	2.925	1.03163e-90	3.58456e-89	0.0119	0.0127
AT4G16590.1	protein_coding	CSLA01, ATCSLA1, ATCSLA01	cellulose synthase-like A01, CELLULOSE SYNTHASE-LIKE A1	8	0	0	36	14	10	10	0	0	25	15	10	10.07	3	17	7.581	2.922	0.000450375	0.000957179	0.2455	0.1593
AT3G08860.1	protein_coding	PYD4	PYRIMIDINE 4	113	83	63	1288	536	773	144	89	69	893	593	756	423.92	101	747	7.576	2.921	1.03515e-55	1.66404e-54	0.0173	0.0157
AT1G05100.1	protein_coding	MAPKKK18	mitogen-activated protein kinase kinase kinase 18	5	2	9	61	37	54	6	2	10	42	41	53	25.73	6	45	7.569	2.92	2.37735e-10	8.36437e-10	0.0707	0.0854
AT1G67800.5	protein_coding	-	-	147	189	166	1869	1362	1566	187	203	181	1295	1506	1532	817.51	190	1444	7.566	2.92	3.08953e-86	9.62331e-85	0.0116	0.0138
AT3G53150.1	protein_coding	UGT73D1	UDP-glucosyl transferase 73D1	0	3	2	11	13	21	0	3	2	8	14	21	7.99	2	14	7.567	2.92	6.45655e-05	0.000150159	0.1409	0.1847
AT1G58420.1	protein_coding	-	-	17	10	15	141	144	119	22	11	16	98	159	116	70.36	16	124	7.564	2.919	3.42519e-17	1.72935e-16	0.0502	0.036
AT4G34990.1	protein_coding	AtMYB32, MYB32	myb domain protein 32	49	75	71	789	483	603	62	81	78	547	534	590	315.23	74	557	7.562	2.919	8.02095e-61	1.4559e-59	0.0143	0.0166
AT1G61230.1	protein_coding	-	-	2	2	2	32	12	20	3	2	2	22	13	20	10.32	2	18	7.554	2.917	3.75289e-06	9.78214e-06	0.1015	0.1566
AT2G40130.1	protein_coding	SMXL8	SMAX1-like 8	115	152	146	2245	1001	988	147	163	160	1556	1107	967	683.1	157	1210	7.554	2.917	8.27225e-61	1.49957e-59	0.0169	0.0143
AT1G07590.1	protein_coding	-	-	9962	9511	8435	89555	76174	100169	12694	10221	9217	62063	84230	97991	46069.3	10711	81428	7.546	2.916	1.37644e-34	1.27993e-33	0.0346	0.0242
AT5G54080.2	protein_coding	HGO, AtHGO	homogentisate 1,2-dioxygenase	352	415	376	4338	3082	3520	449	446	411	3006	3408	3443	1860.51	435	3286	7.544	2.915	1.26999e-91	4.47957e-90	0.0119	0.0125
AT5G15960.1	protein_coding	KIN1		103	53	60	872	560	608	131	57	66	604	619	595	345.35	85	606	7.534	2.913	2.53664e-37	2.54036e-36	0.0271	0.0163
AT2G46680.1	protein_coding	HB-7, ATHB7, ATHB-7	ARABIDOPSIS THALIANA HOMEOBOX 7, homeobox 7	137	204	154	1904	1340	1446	175	219	168	1320	1482	1415	796.31	187	1406	7.527	2.912	1.67363e-84	5.01211e-83	0.0118	0.0139
AT5G56795.1	protein_coding	MT1B	metallothionein 1B	412	383	331	3605	3156	3883	525	412	362	2498	3490	3799	1847.49	433	3262	7.509	2.909	4.78302e-47	6.1624e-46	0.024	0.0125
AT5G43450.1	protein_coding	-	-	242	361	307	2938	2647	2880	308	388	335	2036	2927	2817	1468.7	344	2593	7.487	2.904	7.11283e-89	2.36286e-87	0.0119	0.0127
AT5G52330.3	protein_coding	-	-	13	13	8	131	94	100	17	14	9	91	104	98	55.3	13	98	7.482	2.903	1.17039e-17	6.03115e-17	0.0427	0.0441
AT1G12805.1	protein_coding	-	-	1	4	0	26	4	28	1	4	0	18	4	27	9.23	2	16	7.477	2.902	0.00184486	0.00364683	0.3019	0.1658
AT1G67670.1	protein_coding	-	-	1	0	0	8	3	2	1	0	0	6	3	2	2.02	0	4	7.474	2.902	0.0171276	0.0292441	0.2847	0.2868
AT5G19410.1	protein_coding	ABCG23	ATP-binding cassette G23	22	18	14	215	132	174	28	19	15	149	146	170	87.97	21	155	7.477	2.902	3.13022e-23	2.00815e-22	0.0346	0.0298
AT1G79330.1	protein_coding	AMC6, MC5, MCP2b, ATMCP2b, ATMC5	metacaspase 5, metacaspase 2b	21	11	3	116	94	94	27	12	3	80	104	92	53.02	14	92	7.471	2.901	4.2819e-10	1.48321e-09	0.0985	0.0461
AT5G57010.1	protein_coding	-	-	8	4	6	62	62	49	10	4	7	43	69	48	30.08	7	53	7.468	2.901	1.23962e-10	4.43225e-10	0.0726	0.0762
AT2G23320.1	protein_coding	AtWRKY15, WRKY15	WRKY DNA-binding protein 15	297	336	312	3036	2741	3084	378	361	341	2104	3031	3017	1538.71	360	2717	7.454	2.898	2.69408e-68	5.78772e-67	0.0159	0.0127
AT1G67148.1	protein_coding	-	-	7	6	3	45	46	62	9	6	3	31	51	61	26.89	6	48	7.447	2.897	2.41945e-09	7.97295e-09	0.0851	0.084
AT2G16595.1	protein_coding	-	-	71	70	62	753	550	618	90	75	68	522	608	605	328	78	578	7.444	2.896	2.34016e-55	3.73398e-54	0.0161	0.0165
AT4G38060.1	protein_coding	CCI2	Clavata complex interactor 2	216	205	252	2584	1699	2096	275	220	275	1791	1879	2050	1081.79	257	1907	7.441	2.895	4.70414e-87	1.48175e-85	0.0118	0.0132
AT5G58350.1	protein_coding	ZIK2, WNK4	with no lysine (K) kinase 4	365	431	312	4069	3083	3228	465	463	341	2820	3409	3158	1775.99	423	3129	7.439	2.895	4.31523e-75	1.04413e-73	0.0145	0.0126
AT5G23850.1	protein_coding	-	-	110	128	105	1349	939	955	140	138	115	935	1038	934	549.98	131	969	7.421	2.892	9.39338e-81	2.55337e-79	0.0113	0.0149
AT2G03850.1	protein_coding	-	-	2	2	2	22	24	13	3	2	2	15	27	13	10.23	2	18	7.419	2.891	7.48792e-06	1.9018e-05	0.1097	0.162
AT1G03670.1	protein_coding	-	-	0	2	1	4	14	8	0	2	1	3	15	8	4.89	1	9	7.415	2.89	0.00104788	0.00213523	0.1684	0.2308
AT1G05680.1	protein_coding	UGT74E2	Uridine diphosphate glycosyltransferase 74E2	20	122	50	509	535	448	25	131	55	353	592	438	265.64	70	461	7.411	2.89	4.75722e-29	3.70756e-28	0.0342	0.0173
AT5G01345.1	lncRNA			0	0	1	3	5	3	0	0	1	2	6	3	1.94	0	4	7.401	2.888	0.0206136	0.03469	0.3253	0.2961
AT3G30305.1	protein_coding	-	-	3	0	1	24	11	7	4	0	1	17	12	7	6.76	2	12	7.398	2.887	0.000266632	0.000581428	0.1659	0.1935
AT5G48180.1	protein_coding	NSP5, AtNSP5	nitrile specifier protein 5	288	318	300	3948	1766	3186	367	342	328	2736	1953	3117	1473.68	346	2602	7.399	2.887	7.52461e-68	1.59811e-66	0.0159	0.0127
AT2G30550.2	protein_coding	DALL3	DAD1-Like Lipase 3	263	241	261	2286	2360	2468	335	259	285	1584	2610	2414	1247.91	293	2203	7.391	2.886	1.69361e-48	2.27094e-47	0.0225	0.013
AT2G39490.1	protein_coding	-	-	2	2	4	39	14	28	3	2	4	27	15	27	13.16	3	23	7.391	2.886	4.69049e-07	1.31369e-06	0.0884	0.1357
AT3G20300.1	protein_coding	-	-	268	288	360	3859	2278	2560	341	310	393	2674	2519	2504	1457	348	2566	7.391	2.886	3.35731e-86	1.04341e-84	0.0122	0.0127
AT2G37360.1	protein_coding	ABCG2	ATP-binding cassette G2	92	92	66	1070	602	716	117	99	72	742	666	700	399.31	96	703	7.388	2.885	3.30512e-61	6.04232e-60	0.0148	0.0159
AT4G38340.1	protein_coding	NLP3	NIN-like protein 3	14	19	15	222	110	136	18	20	16	154	122	133	77.2	18	136	7.389	2.885	5.09983e-23	3.24937e-22	0.0324	0.0328
AT3G50930.1	protein_coding	OM66, BCS1, AtBCS1, AtOM66	cytochrome BC1 synthesis, Outer Mitochondrial membrane protein of 66 kDa	141	95	92	1057	992	963	180	102	101	733	1097	942	525.63	128	924	7.382	2.884	1.81072e-33	1.62749e-32	0.0316	0.015
AT4G33565.1	protein_coding	-	-	254	257	296	2673	2322	2497	324	276	323	1852	2568	2443	1297.66	308	2288	7.38	2.884	3.67256e-70	8.13343e-69	0.0151	0.0129
AT2G03505.3	protein_coding	-	-	18	26	15	151	177	213	23	28	16	105	196	208	96	22	170	7.376	2.883	2.49495e-21	1.48989e-20	0.0394	0.0282
AT1G22760.1	protein_coding	PAB3	poly(A) binding protein 3	0	0	2	9	0	12	0	0	2	6	0	12	3.36	1	6	7.369	2.882	0.00746582	0.0135145	0.221	0.2507
AT5G53870.1	protein_coding	ENODL1, AtENODL1	early nodulin-like protein 1	2	3	2	42	13	20	3	3	2	29	14	20	11.83	3	21	7.369	2.882	1.92359e-06	5.14238e-06	0.0987	0.1433
AT3G27884.3	ncRNA		other RNA	2	3	3	33	14	33	3	3	3	23	15	32	13.28	3	23	7.36	2.88	5.64144e-07	1.57043e-06	0.0904	0.1362
AT1G54100.2	protein_coding	ALDH7B4	aldehyde dehydrogenase 7B4	1279	1616	1444	18953	9980	12537	1630	1737	1578	13135	11035	12264	6896.48	1648	12145	7.355	2.879	1.82325e-78	4.70028e-77	0.0145	0.0148
AT5G53120.6	protein_coding	ATSPDS3, SPDS3, SPMS	SPERMIDINE SYNTHASE 3, spermidine synthase 3	343	372	325	3854	2694	3177	437	400	355	2671	2979	3108	1658.28	397	2919	7.355	2.879	1.92572e-79	5.06245e-78	0.0135	0.0126
AT5G55560.1	protein_coding	-	-	53	45	24	374	358	371	68	48	26	259	396	363	193.35	47	339	7.349	2.878	2.94059e-22	1.81731e-21	0.0449	0.0192
AT4G17840.1	protein_coding	-	-	596	613	721	7268	5220	5506	759	659	788	5037	5772	5386	3066.87	735	5398	7.348	2.877	5.54803e-85	1.67404e-83	0.013	0.0128
AT1G01640.2	protein_coding	-	-	30	53	40	422	308	396	38	57	44	292	341	387	193.22	46	340	7.341	2.876	5.76674e-41	6.38818e-40	0.0202	0.0191
AT4G27260.1	protein_coding	WES1, GH3.5		347	456	409	4438	3220	3576	442	490	447	3076	3561	3498	1918.92	460	3378	7.341	2.876	3.76963e-95	1.43261e-93	0.0112	0.0125
AT5G47980.1	protein_coding	-	-	27	30	16	267	157	269	34	32	17	185	174	263	117.65	28	207	7.34	2.876	4.29928e-21	2.54078e-20	0.0432	0.0244
AT1G34750.3	protein_coding	-	-	88	88	79	918	651	811	112	95	86	636	720	793	407.07	98	716	7.333	2.874	1.46474e-59	2.54789e-58	0.0153	0.0158
AT1G49800.1	protein_coding	-	-	1	2	3	13	22	19	1	2	3	9	24	19	9.77	2	17	7.332	2.874	1.28231e-05	3.18821e-05	0.1131	0.1683
AT4G22758.2	protein_coding	-	-	20	28	25	254	209	208	25	30	27	176	231	203	115.58	27	203	7.33	2.874	3.30294e-31	2.76193e-30	0.0242	0.0247
AT2G09460.1	snoRNA			0	1	0	4	3	4	0	1	0	3	3	4	1.85	0	3	7.316	2.871	0.0203358	0.0342555	0.3147	0.2963
AT2G35345.1	protein_coding	-	-	5	7	2	71	33	33	6	8	2	49	36	32	22.34	5	39	7.313	2.87	1.42107e-09	4.75124e-09	0.0707	0.0938
AT3G21380.1	protein_coding	-	-	6	5	3	68	32	38	8	5	3	47	35	37	22.66	5	40	7.312	2.87	4.31663e-10	1.49505e-09	0.0641	0.0931
AT3G48340.1	protein_coding	CEP2	cysteine endopeptidase 2	98	58	35	802	329	655	125	62	38	556	364	641	297.63	75	520	7.31	2.87	1.16088e-22	7.28213e-22	0.0461	0.0168
AT4G13190.1	protein_coding	-	-	8	12	9	122	80	72	10	13	10	85	88	70	46.06	11	81	7.308	2.87	1.1657e-16	5.7193e-16	0.0408	0.0517
AT5G10090.1	protein_coding	TPR13	tetratricopeptide repeat 13	0	3	0	11	10	4	0	3	0	8	11	4	4.3	1	8	7.308	2.869	0.00309329	0.00592417	0.2485	0.2347
AT3G20160.1	protein_coding	PPPS2	Polyprenyl Pyrophosphate Synthase 2	1	0	0	9	0	5	1	0	0	6	0	5	2.07	0	4	7.3	2.868	0.022912	0.0382245	0.2822	0.2823
AT3G28100.2	protein_coding	UMAMIT45	Usually multiple acids move in and out Transporters 45	226	272	256	2717	2017	2221	288	292	280	1883	2230	2173	1190.99	287	2095	7.293	2.867	4.86475e-89	1.6199e-87	0.0114	0.013
AT1G29100.2	protein_coding	-	-	0	6	2	25	21	20	0	6	2	17	23	20	11.46	3	20	7.286	2.865	1.67928e-05	4.1286e-05	0.1443	0.1507
AT4G00870.1	protein_coding	-	-	12	24	5	141	111	102	15	26	5	98	123	100	61.13	15	107	7.278	2.864	2.42832e-15	1.11641e-14	0.0546	0.0405
AT5G48650.1	protein_coding	-	-	15	13	16	261	84	109	19	14	17	181	93	107	71.83	17	127	7.279	2.864	3.03668e-21	1.80875e-20	0.034	0.0344
AT1G72910.1	protein_coding	-	-	214	219	225	1794	2091	2148	273	235	246	1243	2312	2101	1068.43	251	1885	7.276	2.863	3.55173e-46	4.49324e-45	0.0231	0.0132
AT5G63580.1	protein_coding	ATFLS2, FLS2	flavonol synthase 2	16	13	15	181	116	118	20	14	16	125	128	115	69.98	17	123	7.271	2.862	2.28652e-21	1.36776e-20	0.0341	0.0358
AT4G11655.2	protein_coding	CASPL4A4	CASP-like protein 4A4	0	1	6	21	16	18	0	1	7	15	18	18	9.58	3	17	7.264	2.861	0.000162052	0.000361782	0.1973	0.1664
AT1G30040.2	protein_coding	ATGA2OX2, GA2OX2	gibberellin 2-oxidase, GIBBERELLIN 2-OXIDASE 2	18	34	21	280	171	219	23	37	23	194	189	214	113.3	28	199	7.258	2.86	6.9618e-27	5.03955e-26	0.03	0.025
AT3G11410.1	protein_coding	PP2CA, ATPP2CA, AHG3	ARABIDOPSIS THALIANA PROTEIN PHOSPHATASE 2CA, protein phosphatase 2CA	502	632	550	6961	3965	4841	640	679	601	4824	4384	4736	2644	640	4648	7.263	2.86	4.76705e-91	1.66883e-89	0.0118	0.0126
AT1G02980.1	protein_coding	CUL2, ATCUL2	cullin 2	0	2	1	9	7	12	0	2	1	6	8	12	4.83	1	9	7.255	2.859	0.00105926	0.00215731	0.187	0.2261
AT5G06115.1	snoRNA			162	313	249	1525	2114	2914	206	336	272	1057	2338	2851	1176.66	271	2082	7.237	2.855	3.11894e-52	4.55798e-51	0.0202	0.0131
AT1G62045.1	protein_coding	-	-	31	34	30	274	281	306	40	37	33	190	311	299	151.46	37	267	7.228	2.854	5.99823e-31	4.96968e-30	0.0269	0.0213
AT5G41040.1	protein_coding	ASFT, RWP1, HHT	hydroxycinnamoyl- CoA:&omega;-hydroxyacid O-hydroxycinnamoyltransferase, aliphatic suberin feruloyl-transferase, REDUCED LEVELS OF WALL-BOUND PHENOLICS 1	315	338	218	3132	2143	2649	401	363	238	2171	2370	2591	1355.73	334	2377	7.23	2.854	3.70682e-52	5.40581e-51	0.0206	0.0128
AT1G72800.1	protein_coding	-	-	119	161	111	1122	1056	1358	152	173	121	778	1168	1328	619.94	149	1091	7.222	2.852	7.37704e-48	9.75157e-47	0.021	0.0146
AT4G06135.1	lncRNA			0	0	1	4	4	3	0	0	1	3	4	3	1.87	0	3	7.215	2.851	0.0213703	0.0358513	0.3211	0.2963
AT1G62422.1	protein_coding	-	-	106	83	94	771	831	968	135	89	103	534	919	947	454.52	109	800	7.204	2.849	5.89299e-33	5.20799e-32	0.0309	0.0155
AT3G53235.1	protein_coding	-	-	3	6	7	54	44	46	4	6	8	37	49	45	24.83	6	44	7.201	2.848	1.09136e-10	3.91716e-10	0.0604	0.0884
AT4G36052.1	lncRNA		other RNA	0	1	0	7	3	2	0	1	0	5	3	2	1.87	0	3	7.183	2.845	0.0219431	0.0367351	0.3106	0.2916
AT1G14110.1	protein_coding	FUT9, ATFUT9	fucosyltransferase 9	7	6	2	50	45	41	9	6	2	35	50	40	23.68	6	42	7.18	2.844	4.39849e-09	1.42644e-08	0.0808	0.0923
AT2G43720.2	protein_coding	-	-	32	26	34	283	239	311	41	28	37	196	264	304	145.08	35	255	7.169	2.842	5.72426e-30	4.60361e-29	0.0276	0.0218
AT2G38740.1	protein_coding	-	-	473	498	515	5150	3789	4550	603	535	563	3569	4190	4451	2318.41	567	4070	7.159	2.84	3.54101e-82	9.97439e-81	0.0129	0.0125
AT5G38010.1	protein_coding	-	-	51	36	28	503	263	303	65	39	31	349	291	296	178.35	45	312	7.155	2.839	3.9749e-35	3.75488e-34	0.0238	0.0197
AT4G38080.1	protein_coding	-	-	69	67	46	656	498	491	88	72	50	455	551	480	282.63	70	495	7.152	2.838	3.22995e-44	3.88413e-43	0.02	0.0171
AT5G35110.1	protein_coding	-	-	14	1	7	59	53	68	18	1	8	41	59	67	32.1	9	56	7.15	2.838	9.22519e-07	2.52557e-06	0.1476	0.0724
AT1G05450.2	protein_coding	-	-	1	1	2	16	8	15	1	1	2	11	9	15	6.52	1	12	7.139	2.836	0.000140219	0.0003149	0.129	0.1987
AT5G17860.1	protein_coding	CAX7	calcium exchanger 7	332	436	421	4457	2927	3402	423	469	460	3089	3237	3328	1834.16	451	3218	7.143	2.836	6.82201e-94	2.5274e-92	0.011	0.0125
AT2G43660.2	protein_coding	-	-	1	1	2	15	7	17	1	1	2	10	8	17	6.55	1	12	7.134	2.835	0.000151209	0.000338601	0.1288	0.1986
AT4G11370.1	protein_coding	RHA1A	RING-H2 finger A1A	24	24	33	213	242	264	31	26	36	148	268	258	127.65	31	225	7.137	2.835	4.97378e-27	3.61261e-26	0.0301	0.0234
AT4G22270.1	protein_coding	MRB1, ATMRB1	ARABIDOPSIS MEMBRANE RELATED BIGGER1, MEMBRANE RELATED BIGGER1	48	40	51	607	339	352	61	43	56	421	375	344	216.62	53	380	7.137	2.835	6.7095e-44	7.96906e-43	0.0185	0.0184
AT3G09225.1	snoRNA			35	30	26	266	236	323	45	32	28	184	261	316	144.42	35	254	7.128	2.834	2.79382e-24	1.85752e-23	0.0366	0.0218
AT4G13180.1	protein_coding	-	-	210	222	231	2291	1803	1883	268	239	252	1588	1994	1842	1030.34	253	1808	7.127	2.833	1.44815e-77	3.68909e-76	0.0128	0.0133
AT1G15790.3	protein_coding	-	-	72	85	78	685	686	721	92	91	85	475	759	705	367.82	89	646	7.116	2.831	2.2101e-53	3.32538e-52	0.0166	0.0161
AT4G23230.1	protein_coding	CRK15	cysteine-rich RLK (RECEPTOR-like protein kinase) 15	19	18	16	172	143	163	24	19	17	119	158	159	82.97	20	145	7.116	2.831	4.86063e-22	2.98282e-21	0.0345	0.0314
AT1G10690.1	protein_coding	SMR8		25	31	28	314	221	226	32	33	31	218	244	221	129.81	32	228	7.11	2.83	2.18932e-33	1.96274e-32	0.0223	0.023
AT1G52080.1	protein_coding	AR791		171	166	172	2006	1235	1417	218	178	188	1390	1366	1386	787.7	195	1381	7.109	2.83	6.14683e-82	1.72105e-80	0.0115	0.0139
AT3G21560.1	protein_coding	BRT1, UGT84A2	UDP-glucosyl transferase 84A2, Bright Trichomes 1	523	544	559	7461	3469	4409	666	585	611	5171	3836	4313	2530.24	621	4440	7.11	2.83	4.6503e-92	1.65699e-90	0.0115	0.0126
AT5G44565.1	protein_coding	-	-	19	8	12	134	118	99	24	9	13	93	130	97	61.02	15	107	7.108	2.829	4.45808e-14	1.92434e-13	0.0605	0.0407
AT2G04345.1	lncRNA			5	0	0	20	7	12	6	0	0	14	8	12	6.62	2	11	7.103	2.828	0.00212593	0.00416884	0.2867	0.197
AT4G15093.1	protein_coding	LigB, AtLigB		169	158	153	1583	1248	1482	215	170	167	1097	1380	1450	746.52	184	1309	7.099	2.828	5.52707e-58	9.30751e-57	0.0171	0.0141
AT4G18580.2	protein_coding	-	-	73	93	98	812	655	877	93	100	107	563	724	858	407.5	100	715	7.084	2.825	2.55765e-66	5.21809e-65	0.0128	0.0158
AT2G35585.2	protein_coding	-	-	39	31	31	342	252	317	50	33	34	237	279	310	157.11	39	275	7.082	2.824	1.05872e-30	8.70473e-30	0.0272	0.0209
AT4G16050.1	protein_coding	-	-	0	0	1	2	2	6	0	0	1	1	2	6	1.76	0	3	7.075	2.823	0.0276446	0.0454611	0.3119	0.3015
AT5G17040.2	protein_coding	-	-	13	7	3	103	46	62	17	8	3	71	51	61	35.04	9	61	7.07	2.822	5.32253e-11	1.94737e-10	0.0702	0.0653
AT4G22770.1	protein_coding	AHL2	AT-hook motif nuclear localized protein 2	76	85	90	1003	612	670	97	91	98	695	677	655	385.63	95	676	7.066	2.821	2.97122e-68	6.36356e-67	0.0122	0.016
AT1G24575.1	protein_coding	-	-	83	74	81	713	659	746	106	80	89	494	729	730	371.06	92	651	7.06	2.82	8.87717e-45	1.0824e-43	0.0206	0.0161
AT3G48450.1	protein_coding	-	-	9	13	4	86	60	85	11	14	4	60	66	83	39.82	10	70	7.051	2.818	1.44395e-11	5.45204e-11	0.0686	0.0593
AT2G35555.1	protein_coding	-	-	0	2	0	14	2	7	0	2	0	10	2	7	3.49	1	6	7.04	2.816	0.0128868	0.0224737	0.3676	0.2446
AT2G23540.1	protein_coding	-	-	218	169	128	1785	1227	1531	278	182	140	1237	1357	1498	781.8	200	1364	7.036	2.815	3.42461e-40	3.70704e-39	0.0257	0.0139
AT1G73330.1	protein_coding	ATDR4, DR4	drought-repressed 4	1393	1365	1215	14071	9051	12581	1775	1467	1328	9751	10008	12307	6106.1	1523	10689	7.027	2.813	1.2248e-58	2.09535e-57	0.0187	0.0144
AT3G04000.1	protein_coding	-	-	114	174	108	1249	1016	1187	145	187	118	866	1123	1161	600.08	150	1050	7.026	2.813	1.07755e-57	1.80048e-56	0.0165	0.0147
AT4G09110.1	protein_coding	-	-	0	3	1	19	6	14	0	3	1	13	7	14	6.3	1	11	7.029	2.813	0.000934573	0.00191691	0.2174	0.1992
AT4G22950.1	protein_coding	GL19, AGL19	AGAMOUS-like 19	14	6	1	69	56	44	18	6	1	48	62	43	29.69	8	51	7.02	2.812	1.64152e-07	4.75803e-07	0.1215	0.0768
AT1G72830.1	protein_coding	ATHAP2C, NF-YA3, HAP2C	"nuclear factor Y, subunit A3"	145	158	119	1664	1003	1137	185	170	130	1153	1109	1112	643.19	162	1125	7.012	2.81	1.28417e-72	2.96365e-71	0.0127	0.0145
AT5G03495.1	protein_coding	-	-	7	23	18	119	122	157	9	25	20	82	135	154	70.71	18	124	7.011	2.81	4.59663e-20	2.6069e-19	0.0358	0.0359
AT3G30842.1	protein_coding	PDR10, ABCG38, ATPDR10	ATP-binding cassette G38, pleiotropic drug resistance 10	6	5	2	50	34	34	8	5	2	35	38	33	20.12	5	35	7.009	2.809	1.30107e-08	4.08167e-08	0.078	0.1035
AT3G20340.1	protein_coding	-	-	40	66	52	457	437	467	51	71	57	317	483	457	239.25	60	419	6.996	2.807	4.01084e-47	5.17947e-46	0.0169	0.0178
AT1G11700.1	protein_coding	-	-	218	214	261	2414	1660	2078	278	230	285	1673	1836	2033	1055.71	264	1847	6.994	2.806	3.86363e-81	1.05951e-79	0.012	0.0133
AT1G31080.1	protein_coding	-	-	1	0	0	2	8	2	1	0	0	1	9	2	2.24	0	4	6.995	2.806	0.0304609	0.0497356	0.3726	0.2907
AT4G23010.3	protein_coding	ATUTR2, UTR2	UDP-galactose transporter 2	748	803	766	7169	5992	7302	953	863	837	4968	6626	7143	3565.04	884	6246	6.993	2.806	1.30099e-63	2.5062e-62	0.0169	0.013
AT1G13550.1	protein_coding	-	-	0	1	3	23	8	9	0	1	3	16	9	9	6.32	1	11	6.989	2.805	0.000740889	0.00153689	0.2009	0.1975
AT5G57550.1	protein_coding	XTH25, XTR3	xyloglucan endotransglucosylase/hydrolase 25, xyloglucan endotransglycosylase 3	64	37	41	408	383	443	82	40	45	283	424	433	217.62	56	380	6.984	2.804	1.09202e-21	6.61143e-21	0.0449	0.0184
AT3G14630.1	protein_coding	CYP72A9	"cytochrome P450, family 72, subfamily A, polypeptide 9"	1	0	1	7	7	6	1	0	1	5	8	6	3.47	1	6	6.98	2.803	0.00407202	0.00766322	0.2143	0.2536
AT4G16000.1	protein_coding	-	-	25	24	37	236	218	292	32	26	40	164	241	286	131.39	33	230	6.975	2.802	2.41231e-29	1.9007e-28	0.0264	0.023
AT5G63900.1	protein_coding	-	-	0	1	1	7	7	5	0	1	1	5	8	5	3.28	1	6	6.973	2.802	0.004132	0.00777191	0.2008	0.2573
AT4G15393.2	protein_coding	CYP702A5	"cytochrome P450, family 702, subfamily A, polypeptide 5"	70	50	19	561	256	380	89	54	21	389	283	372	201.21	55	348	6.962	2.799	6.00232e-19	3.25875e-18	0.0522	0.0188
AT1G30475.4	protein_coding	-	-	11	7	15	116	53	130	14	8	16	80	59	127	50.68	13	89	6.956	2.798	2.01468e-16	9.77495e-16	0.0406	0.0475
AT5G20230.1	protein_coding	ATBCB, BCB, SAG14	blue-copper-binding protein, BLUE COPPER BINDING PROTEIN, SENESCENCE ASSOCIATED GENE 14	77	91	122	680	955	873	98	98	133	471	1056	854	451.75	110	794	6.956	2.798	2.99427e-42	3.4143e-41	0.0223	0.0155
AT1G50400.1	protein_coding	-	-	13	22	28	215	160	169	17	24	31	149	177	165	93.67	24	164	6.95	2.797	1.73258e-24	1.1591e-23	0.0302	0.0285
AT1G67820.1	protein_coding	-	-	46	66	59	588	467	438	59	71	64	407	516	428	257.73	65	450	6.948	2.797	1.32553e-51	1.91313e-50	0.0152	0.0175
AT1G33960.2	protein_coding	AIG1	AVRRPT2-INDUCED GENE 1	31	45	16	276	261	237	40	48	17	191	289	232	136.18	35	237	6.947	2.796	5.2795e-24	3.47629e-23	0.0357	0.0225
AT1G56170.2	protein_coding	HAP5B, ATHAP5B, NF-YC2	"nuclear factor Y, subunit C2"	45	54	69	617	376	491	57	58	75	428	416	480	252.41	63	441	6.944	2.796	1.72344e-50	2.42853e-49	0.0156	0.0176
AT2G31585.1	ncRNA		other RNA	34	46	56	395	331	445	43	49	61	274	366	435	204.84	51	358	6.946	2.796	1.50451e-43	1.76967e-42	0.0177	0.0188
AT3G56730.6	protein_coding	-	-	17	12	14	118	130	130	22	13	15	82	144	127	67.09	17	118	6.946	2.796	4.85117e-16	2.31241e-15	0.0498	0.0377
AT1G24405.1	protein_coding	-	-	7	1	4	37	29	39	9	1	4	26	32	38	18.37	5	32	6.94	2.795	1.02091e-06	2.78649e-06	0.1195	0.1117
AT2G28755.2	protein_coding	-	-	2	2	1	18	16	12	3	2	1	12	18	12	7.95	2	14	6.938	2.795	5.61994e-05	0.000131313	0.1217	0.1835
AT4G16215.1	protein_coding	-	-	0	1	0	4	2	5	0	1	0	3	2	5	1.82	0	3	6.938	2.795	0.0259702	0.0428789	0.3352	0.2964
AT5G50240.2	protein_coding	PIMT2, AtPIMT2	Arabidopsis thaliana protein-l-isoaspartate methyltransferase 2, protein-l-isoaspartate methyltransferase 2	44	46	67	611	345	441	56	49	73	423	381	431	235.84	59	412	6.942	2.795	7.44683e-46	9.36159e-45	0.0175	0.0179
AT2G29750.1	protein_coding	UGT71C1	UDP-glucosyl transferase 71C1	152	131	97	1462	809	1119	194	141	106	1013	895	1095	573.81	147	1001	6.937	2.794	3.37163e-49	4.60937e-48	0.0195	0.0148
AT1G49960.1	protein_coding	-	-	28	30	23	275	174	274	36	32	25	191	192	268	124.01	31	217	6.924	2.792	4.36193e-26	3.07401e-25	0.0307	0.0237
AT4G23880.1	protein_coding	-	-	38	45	33	368	289	356	48	48	36	255	320	348	175.95	44	308	6.919	2.79	3.84557e-34	3.5267e-33	0.0237	0.0199
AT1G72900.1	protein_coding	-	-	337	353	301	2637	2967	2992	429	379	329	1827	3281	2927	1528.81	379	2678	6.904	2.787	1.32405e-42	1.51908e-41	0.0245	0.0127
AT3G45638.2	ncRNA		other RNA	1	2	1	8	13	14	1	2	1	6	14	14	6.36	1	11	6.902	2.787	0.000279101	0.000607338	0.1399	0.2062
AT3G49980.2	protein_coding	-	-	0	0	1	3	3	4	0	0	1	2	3	4	1.73	0	3	6.902	2.787	0.0266647	0.0439608	0.3223	0.3016
AT2G27830.1	protein_coding	-	-	202	230	202	1728	1790	1973	257	247	221	1198	1979	1930	972.04	242	1702	6.892	2.785	1.30777e-51	1.88848e-50	0.0194	0.0134
AT3G57740.2	protein_coding	-	-	10	15	6	91	76	100	13	16	7	63	84	98	46.72	12	82	6.894	2.785	2.63434e-13	1.09131e-12	0.0569	0.0517
AT5G55460.1	protein_coding	AtLTP4.5		16	11	3	68	97	82	20	12	3	47	107	80	45.01	12	78	6.891	2.785	3.36954e-08	1.02691e-07	0.1154	0.0543
AT5G64450.1	protein_coding	-	-	9	9	3	57	59	65	11	10	3	40	65	64	32.12	8	56	6.892	2.785	1.26302e-09	4.24103e-09	0.0818	0.0724
AT1G75450.1	protein_coding	ATCKX6, ATCKX5, CKX5	ARABIDOPSIS THALIANA CYTOKININ OXIDASE 5, CYTOKININ OXIDASE 6, cytokinin oxidase 5	36	61	51	485	403	378	46	66	56	336	446	370	219.78	56	384	6.883	2.783	1.40884e-45	1.75687e-44	0.0169	0.0183
AT2G40095.2	protein_coding	-	-	61	63	88	579	589	644	78	68	96	401	651	630	320.69	81	561	6.882	2.783	1.25637e-45	1.56744e-44	0.0189	0.0166
AT2G38390.1	protein_coding	-	-	366	292	203	2715	2084	2523	466	314	222	1882	2304	2468	1276.01	334	2218	6.878	2.782	7.50021e-34	6.82682e-33	0.031	0.0129
AT3G53690.1	protein_coding	-	-	13	16	23	167	136	143	17	17	25	116	150	140	77.48	20	135	6.879	2.782	1.6785e-21	1.01075e-20	0.0334	0.0331
AT4G26220.1	protein_coding	CCoAOMT7	caffeoyl coenzyme A ester O-methyltransferase 7	50	38	40	416	283	428	64	41	44	288	313	419	194.7	50	340	6.871	2.781	2.28348e-31	1.91748e-30	0.0272	0.0191
AT5G13200.2	protein_coding	GER5	GEm-Related 5	143	160	122	1581	1078	1068	182	172	133	1096	1192	1045	636.65	162	1111	6.871	2.781	2.97717e-75	7.23497e-74	0.0119	0.0145
AT2G35550.1	protein_coding	BPC7, ATBPC7, BBR	BASIC PENTACYSTEINE 7, basic pentacysteine 7	12	18	16	139	118	137	15	19	17	96	130	134	68.82	17	120	6.869	2.78	5.5246e-21	3.2464e-20	0.0323	0.0366
AT1G56165.1	lncRNA		other RNA	14	10	14	118	97	116	18	11	15	82	107	113	57.73	15	101	6.864	2.779	1.02898e-16	5.0636e-16	0.0432	0.0427
AT5G43980.1	protein_coding	PDLP1A, PDLP1	plasmodesmata-located protein 1, PLASMODESMATA-LOCATED PROTEIN 1A	30	26	33	305	203	271	38	28	36	211	224	265	133.86	34	233	6.857	2.778	1.45345e-31	1.22712e-30	0.0236	0.0227
AT3G50910.1	protein_coding	-	-	321	379	332	3592	2574	2801	409	407	363	2489	2846	2740	1542.46	393	2692	6.848	2.776	4.39791e-83	1.27873e-81	0.0119	0.0127
AT4G15530.7	protein_coding	PPDK	pyruvate orthophosphate dikinase	950	1141	1084	13100	6960	8279	1211	1226	1185	9079	7696	8099	4749.13	1207	8291	6.852	2.776	7.75657e-83	2.23209e-81	0.0127	0.0137
AT1G15410.2	protein_coding	-	-	344	381	401	4588	2625	2796	438	409	438	3180	2903	2735	1683.89	428	2939	6.844	2.775	2.16393e-86	6.74775e-85	0.0115	0.0126
AT1G31820.1	protein_coding	PUT1	POLYAMINE UPTAKE TRANSPORTER 1	145	208	200	1854	1318	1584	185	224	219	1285	1457	1550	819.77	209	1431	6.845	2.775	3.964e-83	1.15377e-81	0.011	0.0138
AT2G10440.1	protein_coding	MED15_2	MEDIATOR 15_2	2	10	5	86	35	35	3	11	5	60	39	34	25.22	6	44	6.846	2.775	2.60642e-08	8.00266e-08	0.0925	0.0847
AT2G47245.1	protein_coding	-	-	1	1	0	12	5	4	1	1	0	8	6	4	3.35	1	6	6.844	2.775	0.00423123	0.00794467	0.1938	0.2508
AT2G28710.1	protein_coding	-	-	17	7	7	111	82	74	22	8	8	77	91	72	46.14	13	80	6.839	2.774	4.60437e-12	1.78998e-11	0.0662	0.0521
AT4G15417.2	protein_coding	ATRTL1, RTL1	RNAse II-like 1	6	7	5	45	57	52	8	8	5	31	63	51	27.62	7	48	6.836	2.773	2.32557e-10	8.18633e-10	0.0636	0.0825
AT1G27045.3	protein_coding	HB54, ATHB54	homeobox protein 54	8	7	10	77	71	68	10	8	11	53	79	67	37.84	10	66	6.831	2.772	6.50894e-13	2.64624e-12	0.0527	0.0624
AT4G01070.1	protein_coding	UGT72B1, GT72B1	UDP-GLUCOSE-DEPENDENT GLUCOSYLTRANSFERASE 72 B1	1091	1093	1129	11889	8331	8644	1390	1175	1234	8239	9212	8456	4950.97	1266	8636	6.829	2.772	4.16553e-76	1.0311e-74	0.0139	0.0138
AT2G23110.2	protein_coding	-	-	0	1	0	6	3	2	0	1	0	4	3	2	1.75	0	3	6.82	2.77	0.0270729	0.044597	0.3181	0.2966
AT5G56200.1	protein_coding	-	-	4	4	8	44	44	47	5	4	9	30	49	46	23.88	6	42	6.812	2.768	1.22904e-09	4.12992e-09	0.0667	0.0921
AT1G23200.1	protein_coding	HMS	HIGHLY METHYL ESTERIFIED SEEDS	57	62	75	777	442	492	73	67	82	538	489	481	288.29	74	503	6.805	2.767	6.41139e-53	9.48852e-52	0.015	0.017
AT2G08580.1	snoRNA			67	98	69	638	581	771	85	105	75	442	642	754	350.82	88	613	6.807	2.767	3.19557e-44	3.84444e-43	0.0199	0.0163
AT5G22290.2	protein_coding	NAC089, FSQ6, anac089	fructose-sensing quantitative trait locus 6, NAC domain containing protein 89	148	157	168	1711	1228	1167	189	169	184	1186	1358	1142	704.35	181	1229	6.798	2.765	1.48127e-73	3.49641e-72	0.0123	0.0142
AT2G08585.1	snoRNA			41	63	36	391	351	437	52	68	39	271	388	427	207.65	53	362	6.794	2.764	7.25787e-32	6.18367e-31	0.0267	0.0187
AT3G08700.1	protein_coding	UBC12	ubiquitin-conjugating enzyme 12	6	2	3	63	21	22	8	2	3	44	23	22	16.91	4	30	6.794	2.764	8.35814e-08	2.47497e-07	0.076	0.1138
AT3G47200.2	protein_coding	-	-	9	9	5	81	43	83	11	10	5	56	48	81	35.25	9	62	6.793	2.764	4.89274e-11	1.79435e-10	0.0661	0.0656
AT1G23440.2	protein_coding	-	-	292	389	358	3249	2634	2958	372	418	391	2252	2913	2894	1539.86	394	2686	6.786	2.763	2.97561e-83	8.69705e-82	0.0118	0.0127
AT3G01970.1	protein_coding	WRKY45, ATWRKY45	WRKY DNA-BINDING PROTEIN 45, WRKY DNA-binding protein 45	65	49	34	325	473	449	83	53	37	225	523	439	226.69	58	396	6.787	2.763	1.30664e-15	6.09034e-15	0.0638	0.0182
AT5G15180.1	protein_coding	PRX56	peroxidase 56	19	24	27	252	142	217	24	26	30	175	157	212	103.91	27	181	6.788	2.763	1.41612e-27	1.05067e-26	0.0255	0.0264
AT5G04760.1	protein_coding	-	-	89	137	123	1016	911	1003	113	147	134	704	1007	981	514.61	131	897	6.783	2.762	4.96993e-74	1.1831e-72	0.0113	0.0151
AT5G05255.1	lncRNA			1	0	0	4	3	4	1	0	0	3	3	4	1.88	0	3	6.786	2.762	0.0252076	0.0417431	0.3266	0.2963
AT4G31860.2	protein_coding	-	-	323	429	383	3851	2855	2999	412	461	419	2669	3157	2934	1675.11	431	2920	6.777	2.761	2.12852e-88	7.01258e-87	0.0111	0.0126
AT4G14630.1	protein_coding	GLP9	germin-like protein 9	15	6	12	117	128	55	19	6	13	81	142	54	52.52	13	92	6.775	2.76	3.05478e-10	1.0694e-09	0.0852	0.0467
AT4G23060.1	protein_coding	IQD22	IQ-domain 22	149	176	182	1876	1217	1298	190	189	199	1300	1346	1270	748.91	193	1305	6.77	2.759	1.91981e-80	5.16336e-79	0.0111	0.0141
AT3G27185.1	protein_coding	-	-	16	16	24	165	131	178	20	17	26	114	145	174	82.86	21	144	6.765	2.758	1.1236e-22	7.05457e-22	0.0309	0.0314
AT3G26210.1	protein_coding	CYP71B23	"cytochrome P450, family 71, subfamily B, polypeptide 23"	193	203	153	1546	1489	1614	246	218	167	1071	1646	1579	821.34	210	1432	6.761	2.757	2.13995e-43	2.50656e-42	0.0228	0.0138
AT4G14010.1	protein_coding	RALFL32	ralf-like 32	168	213	172	1671	1334	1701	214	229	188	1158	1475	1664	821.34	210	1432	6.756	2.756	1.08445e-61	2.01014e-60	0.0153	0.0138
AT5G54040.1	protein_coding	-	-	60	46	24	436	302	348	76	49	26	302	334	340	188.11	50	325	6.755	2.756	1.26199e-22	7.90573e-22	0.0405	0.0193
AT1G18710.1	protein_coding	AtMYB47, MYB47	myb domain protein 47	14	8	8	110	74	77	18	9	9	76	82	75	44.76	12	78	6.752	2.755	9.97436e-14	4.22524e-13	0.0518	0.0533
AT5G09765.1	lncRNA			1	0	0	3	3	5	1	0	0	2	3	5	1.93	0	3	6.746	2.754	0.0271639	0.0447205	0.3428	0.2962
AT3G16390.2	protein_coding	NSP3	nitrile specifier protein 3	12	12	14	153	81	102	15	13	15	106	90	100	56.48	14	99	6.742	2.753	3.63916e-18	1.91624e-17	0.0361	0.043
AT3G04570.1	protein_coding	AHL19	AT-hook motif nuclear-localized protein 19	58	39	27	398	269	380	74	42	30	276	297	372	181.72	49	315	6.734	2.752	4.3716e-21	2.58297e-20	0.0437	0.0196
AT5G41890.1	protein_coding	-	-	1	0	0	8	3	1	1	0	0	6	3	1	1.85	0	3	6.735	2.752	0.0283237	0.0464958	0.2973	0.2917
AT2G28110.1	protein_coding	IRX7, FRA8	IRREGULAR XYLEM 7, FRAGILE FIBER 8	73	52	62	538	483	564	93	56	68	373	534	552	279.22	72	486	6.73	2.751	4.34867e-31	3.61691e-30	0.0292	0.0171
AT3G53510.1	protein_coding	ABCG20	ATP-binding cassette G20	52	47	24	429	260	357	66	51	26	297	287	349	179.51	48	311	6.731	2.751	2.04586e-23	1.31915e-22	0.0383	0.0197
AT5G40010.1	protein_coding	AATP1, ASD	AAA-ATPase 1, ATPase-in-Seed-Development	3	4	2	34	25	20	4	4	2	24	28	20	13.51	3	24	6.72	2.749	6.64799e-07	1.84037e-06	0.0848	0.136
AT1G32690.1	protein_coding	-	-	77	65	78	623	595	642	98	70	85	432	658	628	328.49	84	573	6.717	2.748	1.02634e-38	1.06089e-37	0.0229	0.0165
AT4G36510.1	protein_coding	-	-	0	2	0	2	7	6	0	2	0	1	8	6	2.86	1	5	6.717	2.748	0.0129299	0.0225402	0.2821	0.2723
AT3G50350.2	protein_coding	-	-	61	57	46	553	431	412	78	61	50	383	477	403	242.02	63	421	6.708	2.746	4.15554e-40	4.48782e-39	0.0204	0.0178
AT4G36795.1	protein_coding	-	-	3	8	2	50	29	31	4	9	2	35	32	30	18.61	5	32	6.706	2.746	1.36089e-07	3.96888e-07	0.0907	0.1087
AT1G73190.1	protein_coding	TIP3;1, ALPHA-TIP	ALPHA-TONOPLAST INTRINSIC PROTEIN	4	2	0	42	7	12	5	2	0	29	8	12	9.31	2	16	6.706	2.745	7.96798e-05	0.000183858	0.1303	0.1616
AT1G44160.1	protein_coding	-	-	24	11	14	146	137	128	31	12	15	101	151	125	72.6	19	126	6.701	2.744	7.7973e-14	3.32366e-13	0.0616	0.0351
AT2G39210.1	protein_coding	-	-	169	210	174	1563	1451	1629	215	226	190	1083	1604	1594	818.73	210	1427	6.7	2.744	8.54891e-60	1.49825e-58	0.0157	0.0138
AT3G47220.1	protein_coding	PLC9, ATPLC9	phosphatidylinositol-specific phospholipase C9	11	10	2	100	41	60	14	11	2	69	45	59	33.38	9	58	6.693	2.743	1.23356e-09	4.1441e-09	0.0807	0.0679
AT4G10380.1	protein_coding	NLM8, NIP5;1, AtNIP5;1, NLM6	NOD26-LIKE MIP 6, NOD26-like intrinsic protein 5;1, NOD26-LIKE MIP 8	164	172	131	1471	1105	1377	209	185	143	1019	1222	1347	687.55	179	1196	6.695	2.743	9.54522e-51	1.35184e-49	0.0186	0.0143
AT3G04210.2	protein_coding	-	-	853	924	964	7967	7199	7905	1087	993	1053	5521	7960	7733	4058	1044	7071	6.69	2.742	1.00426e-62	1.90055e-61	0.0165	0.0133
AT3G48115.2	ncRNA		other RNA	96	132	133	978	882	1143	122	142	145	678	975	1118	530.12	136	924	6.675	2.739	2.76832e-67	5.76564e-66	0.0126	0.015
AT5G46140.1	protein_coding	-	-	14	14	10	147	97	85	18	15	11	102	107	83	56.02	15	97	6.675	2.739	1.3916e-17	7.14995e-17	0.0375	0.0435
AT2G32610.1	protein_coding	CSLB01, ATCSLB1, ATCSLB01	cellulose synthase-like B1, CELLULOSE SYNTHASE LIKE B1	17	3	12	107	54	104	22	3	13	74	60	102	45.6	13	79	6.673	2.738	2.85526e-11	1.05992e-10	0.0706	0.0524
AT1G21010.1	protein_coding	-	-	100	100	102	942	656	971	127	107	111	653	725	950	445.74	115	776	6.659	2.735	3.61204e-55	5.74374e-54	0.0156	0.0155
AT1G72930.1	protein_coding	TN10, AtTN10, TIR	toll/interleukin-1 receptor-like, TIR-nucleotide binding site family 10	747	824	759	5557	6729	7282	952	886	829	3851	7441	7124	3513.69	889	6139	6.651	2.734	8.56671e-40	9.15277e-39	0.0261	0.013
AT3G04050.1	protein_coding	-	-	5	1	0	22	14	12	6	1	0	15	15	12	8.32	2	14	6.652	2.734	0.000511461	0.00107978	0.2099	0.1788
AT3G44700.1	protein_coding	-	-	2	1	5	18	18	29	3	1	5	12	20	28	11.64	3	20	6.654	2.734	9.4627e-06	2.38301e-05	0.111	0.1513
AT4G29340.1	protein_coding	PRF4, AtPRF4	profilin 4	5	2	0	19	12	31	6	2	0	13	13	30	10.88	3	19	6.651	2.734	0.000524396	0.00110568	0.2301	0.1565
AT3G47100.1	protein_coding	-	-	3	2	1	13	21	18	4	2	1	9	23	18	9.48	2	17	6.638	2.731	9.37137e-05	0.00021477	0.1475	0.1713
AT2G03200.1	protein_coding	-	-	64	52	60	571	384	537	82	56	66	396	425	525	258.11	68	449	6.634	2.73	5.09863e-41	5.65927e-40	0.0199	0.0175
AT1G31490.1	protein_coding	-	-	1	4	1	23	10	20	1	4	1	16	11	20	8.87	2	16	6.623	2.727	0.000140601	0.000315731	0.1588	0.1712
AT2G28850.1	protein_coding	CYP710A3	cytochrome P450, family 710, subfamily A, polypeptide 3	2	1	0	11	11	5	3	1	0	8	12	5	4.72	1	8	6.622	2.727	0.00205265	0.0040325	0.195	0.2289
AT5G46350.1	protein_coding	ATWRKY8, WRKY8	ARABIDOPSIS THALIANA WRKY DNA-BINDING PROTEIN 8, WRKY DNA-binding protein 8	11	3	8	65	57	61	14	3	9	45	63	60	32.29	9	56	6.623	2.727	4.74776e-09	1.53561e-08	0.0876	0.0718
AT1G46768.1	protein_coding	RAP2.1	related to AP2 1	24	30	26	253	175	245	31	32	28	175	194	240	116.62	30	203	6.615	2.726	1.74258e-27	1.2881e-26	0.0263	0.0246
AT4G15490.1	protein_coding	UGT84A3		520	667	568	6496	3795	4604	663	717	621	4502	4196	4504	2533.69	667	4401	6.605	2.724	1.72766e-83	5.06014e-82	0.0119	0.0126
AT1G66020.2	protein_coding	-	-	9	13	3	90	48	72	11	14	3	62	53	70	35.77	9	62	6.605	2.723	9.13565e-10	3.10264e-09	0.0804	0.0646
AT2G30210.1	protein_coding	LAC3	laccase 3	153	136	125	1437	1027	1021	195	146	137	996	1136	999	601.33	159	1044	6.601	2.723	8.05707e-61	1.46151e-59	0.0146	0.0147
AT4G16160.2	protein_coding	ATOEP16-2, ATOEP16-S		0	0	1	6	2	3	0	0	1	4	2	3	1.73	0	3	6.604	2.723	0.0296548	0.0484987	0.3225	0.2967
AT5G38030.1	protein_coding	-	-	93	83	55	746	486	706	119	89	60	517	537	691	335.47	89	582	6.605	2.723	3.71164e-31	3.09628e-30	0.0294	0.0164
AT4G29770.2	protein_coding	HTT1	HEAT-INDUCED TAS1 TARGET 1	1	2	3	17	17	16	1	2	3	12	19	16	8.82	2	16	6.596	2.722	3.99807e-05	9.48275e-05	0.1167	0.1751
AT2G46130.2	protein_coding	WRKY43, ATWRKY43	WRKY DNA-binding protein 43, WRKY DNA-BINDING PROTEIN 43	8	10	6	86	49	71	10	11	7	60	54	69	35.12	9	61	6.592	2.721	5.14596e-12	1.9947e-11	0.055	0.0657
AT5G46080.1	protein_coding	-	-	22	34	30	264	209	235	28	37	33	183	231	230	123.55	33	215	6.594	2.721	3.74213e-30	3.02956e-29	0.0233	0.0238
AT3G50400.1	protein_coding	-	-	24	23	12	198	131	165	31	25	13	137	145	161	85.32	23	148	6.588	2.72	1.96588e-18	1.04759e-17	0.0423	0.0306
AT5G45690.1	protein_coding	-	-	2	0	3	31	9	9	3	0	3	21	10	9	7.68	2	13	6.585	2.719	0.000294638	0.000639605	0.1599	0.18
AT1G30100.1	protein_coding	NCED5, ATNCED5	nine-cis-epoxycarotenoid dioxygenase 5, NINE-CIS-EPOXYCAROTENOID DIOXYGENASE 5	1	9	3	39	30	30	1	10	3	27	33	29	17.3	5	30	6.581	2.718	8.97073e-07	2.4588e-06	0.1065	0.1156
AT5G23000.1	protein_coding	ATMYB37, RAX1, MYB37	myb domain protein 37, REGULATOR OF AXILLARY MERISTEMS 1	11	17	22	170	113	131	14	18	24	118	125	128	71.21	19	124	6.577	2.717	5.75731e-20	3.24739e-19	0.0342	0.0353
AT1G64065.1	protein_coding	-	-	28	18	22	192	215	161	36	19	24	133	238	157	101.23	26	176	6.57	2.716	2.19626e-17	1.11795e-16	0.0479	0.0272
AT4G13880.1	protein_coding	AtRLP48, RLP48	receptor like protein 48	14	17	22	175	140	125	18	18	24	121	155	122	76.42	20	133	6.568	2.715	1.95957e-20	1.12572e-19	0.034	0.0334
AT4G04620.3	protein_coding	ATG8B	autophagy 8b	164	205	240	1767	1477	1739	209	220	262	1225	1633	1701	875.08	230	1520	6.562	2.714	2.99083e-77	7.57073e-76	0.0116	0.0137
AT2G37430.1	protein_coding	ZAT11	zinc finger of Arabidopsis thaliana 11	2	1	7	18	26	32	3	1	8	12	29	31	13.97	4	24	6.557	2.713	7.97261e-06	2.02013e-05	0.1202	0.1366
AT5G17000.1	protein_coding	-	-	438	484	413	4472	3184	3452	558	520	451	3099	3521	3377	1921.06	510	3332	6.549	2.711	1.23796e-76	3.08619e-75	0.0127	0.0125
AT4G24110.1	protein_coding	-	-	11	7	5	68	61	62	14	8	5	47	67	61	33.71	9	58	6.543	2.71	3.72448e-10	1.29558e-09	0.0722	0.0692
AT5G67080.1	protein_coding	MAPKKK19	mitogen-activated protein kinase kinase kinase 19	26	10	14	92	147	167	33	11	15	64	163	163	74.81	20	130	6.545	2.71	2.11008e-08	6.52168e-08	0.1138	0.0346
AT4G27830.1	protein_coding	AtBGLU10, BGLU10	beta glucosidase 10	712	1037	951	9687	6096	6643	907	1114	1039	6713	6741	6499	3835.56	1020	6651	6.537	2.709	2.08911e-80	5.6133e-79	0.0125	0.0132
AT1G57590.1	protein_coding	-	-	235	274	233	3140	1653	1611	299	294	255	2176	1828	1576	1071.39	283	1860	6.534	2.708	9.06652e-82	2.51837e-80	0.0111	0.0132
AT1G15385.1	protein_coding	-	-	1	7	0	9	28	15	1	8	0	6	31	15	10.11	3	17	6.53	2.707	0.00016789	0.000374128	0.1571	0.1677
AT2G41230.1	protein_coding	ARL2, OSR1	ARGOS-Like2, ORGAN SIZE RELATED 1	48	48	41	297	430	406	61	52	45	206	475	397	206	53	359	6.527	2.707	1.86743e-22	1.16127e-21	0.0395	0.0188
AT3G21710.1	protein_coding	VUP1	VASCULAR-RELATED UNKNOWN PROTEIN 1	46	55	54	469	345	466	59	59	59	325	381	456	223.18	59	387	6.529	2.707	1.22184e-41	1.37584e-40	0.0182	0.0182
AT5G43690.1	protein_coding	-	-	22	14	12	135	111	152	28	15	13	94	123	149	70.2	19	122	6.53	2.707	3.4422e-14	1.49669e-13	0.0571	0.0361
AT5G60470.2	protein_coding	-	-	9	11	8	143	56	56	11	12	9	99	62	55	41.31	11	72	6.529	2.707	8.47005e-14	3.60055e-13	0.0455	0.0559
AT3G16030.2	protein_coding	RFO3, CES101	CALLUS EXPRESSION OF RBCS 101, RESISTANCE TO FUSARIUM OXYSPORUM 3	67	88	94	930	561	598	85	95	103	645	620	585	355.42	94	617	6.527	2.706	3.52635e-58	5.95985e-57	0.0135	0.0162
AT3G19150.3	protein_coding	AtKRP6, ICK4, ACK1, KRP6	ARABIDOPSIS CDK INHIBITOR 1, KIP-related protein 6	67	91	121	981	619	694	85	98	132	680	684	679	393.1	105	681	6.522	2.705	5.49006e-54	8.45608e-53	0.0153	0.0159
AT3G50200.1	protein_coding	-	-	2	8	3	33	31	37	3	9	3	23	34	36	17.96	5	31	6.517	2.704	2.08111e-07	5.98814e-07	0.0884	0.1137
AT3G55470.2	protein_coding	-	-	108	118	123	971	905	977	138	127	134	673	1001	956	504.7	133	877	6.514	2.704	7.67621e-57	1.26152e-55	0.015	0.0152
AT1G01360.1	protein_coding	PYL9, RCAR1	regulatory component of ABA receptor 1, PYRABACTIN RESISTANCE 1-LIKE 9	164	120	161	1601	1016	1094	209	129	176	1110	1123	1070	636.17	171	1101	6.513	2.703	1.95559e-58	3.32724e-57	0.0152	0.0145
AT2G32020.1	protein_coding	-	-	8	8	4	34	58	78	10	9	4	24	64	76	31.19	8	55	6.505	2.702	7.06718e-08	2.10428e-07	0.1009	0.0753
AT2G09905.1	lncRNA			0	3	0	12	4	8	0	3	0	8	4	8	3.96	1	7	6.498	2.7	0.0125111	0.0218772	0.3764	0.238
AT2G23790.1	protein_coding	-	-	402	504	453	4843	2955	3492	512	542	495	3356	3267	3416	1931.45	516	3346	6.483	2.697	3.85853e-85	1.16804e-83	0.0112	0.0125
AT3G11570.1	protein_coding	TBL8	TRICHOME BIREFRINGENCE-LIKE 8	25	22	17	191	177	156	32	24	19	132	196	153	92.46	25	160	6.481	2.696	1.34913e-20	7.80648e-20	0.036	0.0289
AT3G20940.1	protein_coding	CYP705A30	"cytochrome P450, family 705, subfamily A, polypeptide 30"	27	28	12	240	95	255	34	30	13	166	105	249	99.74	26	173	6.48	2.696	2.00487e-12	7.94086e-12	0.0727	0.0271
AT5G53970.1	protein_coding	TAT7	tyrosine aminotransferase 7	300	372	441	3740	2509	2856	382	400	482	2592	2774	2794	1570.68	421	2720	6.478	2.696	3.67298e-80	9.82189e-79	0.0118	0.0127
AT1G51890.2	protein_coding	-	-	66	74	61	593	574	471	84	80	67	411	635	461	289.45	77	502	6.472	2.694	2.01205e-44	2.43527e-43	0.0179	0.017
AT2G38890.3	protein_coding	-	-	3	0	0	14	5	6	4	0	0	10	6	6	4.15	1	7	6.472	2.694	0.00604338	0.0110795	0.2743	0.2351
AT3G50810.1	protein_coding	CASPL5C2	CASP-like protein 5C2	20	16	33	198	167	187	25	17	36	137	185	183	97.26	26	168	6.47	2.694	3.67061e-21	2.17661e-20	0.0353	0.0278
AT5G09470.1	protein_coding	DIC3	dicarboxylate carrier 3	11	12	17	116	95	113	14	13	19	80	105	111	56.91	15	99	6.473	2.694	3.52759e-17	1.77976e-16	0.0379	0.0433
AT4G22530.1	protein_coding	-	-	97	103	70	724	696	761	124	111	76	502	770	744	387.76	104	672	6.461	2.692	3.00258e-35	2.84213e-34	0.0253	0.016
AT5G63790.1	protein_coding	NAC102, ANAC102	NAC domain containing protein 102	576	632	667	5700	4738	4838	734	679	729	3950	5239	4733	2677.34	714	4641	6.461	2.692	4.86386e-72	1.11149e-70	0.0136	0.0126
AT1G53790.3	protein_coding	-	-	81	105	84	875	621	709	103	113	92	606	687	694	382.41	103	662	6.455	2.69	7.47242e-60	1.31288e-58	0.0131	0.016
AT1G66480.1	protein_coding	-	-	37	46	37	364	304	305	47	49	40	252	336	298	170.63	45	295	6.451	2.689	8.96197e-36	8.61427e-35	0.0202	0.0201
AT5G09978.1	protein_coding	PEP7	elicitor peptide 7 precursor	14	18	4	89	70	135	18	19	4	62	77	132	52.12	14	90	6.447	2.689	2.04317e-08	6.32605e-08	0.1078	0.047
AT5G27940.1	protein_coding	WPP3	WPP domain protein 3	6	1	2	26	23	24	8	1	2	18	25	23	12.97	4	22	6.448	2.689	4.19805e-05	9.92677e-05	0.1553	0.1414
AT1G30700.1	protein_coding	AtBBE8		115	60	91	803	704	626	147	64	99	556	778	612	376.3	103	649	6.446	2.688	7.15234e-26	5.01147e-25	0.0362	0.016
AT1G55265.1	protein_coding	-	-	39	44	35	410	246	323	50	47	38	284	272	316	167.89	45	291	6.444	2.688	3.48477e-34	3.20212e-33	0.0215	0.0203
AT2G18780.1	protein_coding	-	-	23	28	36	257	197	247	29	30	39	178	218	242	122.72	33	213	6.444	2.688	2.78072e-29	2.18482e-28	0.0236	0.0239
AT2G21180.1	protein_coding	-	-	87	77	96	652	634	828	111	83	105	452	701	810	376.9	100	654	6.443	2.688	2.32031e-38	2.3756e-37	0.0227	0.016
AT2G32790.1	protein_coding	-	-	3	1	1	16	16	11	4	1	1	11	18	11	7.59	2	13	6.444	2.688	0.000275331	0.000599695	0.1572	0.1887
AT5G55490.2	protein_coding	ATGEX1, GEX1	gamete expressed protein 1, GAMETE EXPRESSED PROTEIN 1	6	0	1	28	6	22	8	0	1	19	7	22	9.38	3	16	6.439	2.687	0.000431948	0.000920071	0.1912	0.1657
AT1G62530.2	protein_coding	-	-	1	1	0	7	4	8	1	1	0	5	4	8	3.24	1	6	6.434	2.686	0.00682996	0.0124262	0.2237	0.2573
AT3G60640.1	protein_coding	ATG8G	AUTOPHAGY 8G	109	96	119	976	764	893	139	103	130	676	845	874	461.14	124	798	6.432	2.685	2.85012e-54	4.44126e-53	0.0155	0.0154
AT1G66800.1	protein_coding	-	-	38	29	16	267	155	258	48	31	17	185	171	252	117.65	32	203	6.419	2.682	2.11414e-16	1.02469e-15	0.0527	0.0244
AT3G23910.1	protein_coding	-	-	213	267	261	2687	1718	1701	271	287	285	1862	1900	1664	1044.9	281	1809	6.418	2.682	1.08736e-80	2.95286e-79	0.0111	0.0133
AT2G28570.1	protein_coding	-	-	22	34	24	222	217	196	28	37	26	154	240	192	112.72	30	195	6.414	2.681	2.7247e-27	1.99981e-26	0.0251	0.0252
AT1G29000.1	protein_coding	-	-	3	1	1	21	11	12	4	1	1	15	12	12	7.41	2	13	6.41	2.68	0.000181404	0.000402767	0.1369	0.1875
AT5G61010.1	protein_coding	EXO70E2, ATEXO70E2	exocyst subunit exo70 family protein E2	321	440	368	3706	2552	2890	409	473	402	2568	2822	2827	1583.56	428	2739	6.407	2.68	4.15305e-81	1.13776e-79	0.0115	0.0127
AT1G33540.1	protein_coding	scpl18	serine carboxypeptidase-like 18	2	1	0	11	6	10	3	1	0	8	7	10	4.61	1	8	6.405	2.679	0.00257721	0.00499564	0.2083	0.2291
AT3G52970.2	protein_coding	CYP76G1	"cytochrome P450, family 76, subfamily G, polypeptide 1"	3	0	2	16	13	13	4	0	2	11	14	13	7.36	2	13	6.393	2.677	0.000463267	0.000982563	0.1791	0.1906
AT3G22620.1	protein_coding	-	-	140	107	85	994	716	958	178	115	93	689	792	937	467.34	129	806	6.387	2.675	1.63402e-32	1.42206e-31	0.0282	0.0154
AT3G16720.1	protein_coding	TL2, ATL2	TOXICOS EN LEVADURA 2	225	257	224	1866	1878	1912	287	276	245	1293	2077	1870	1007.98	269	1747	6.384	2.674	2.64392e-53	3.96106e-52	0.0175	0.0134
AT4G26470.3	protein_coding	-	-	37	17	26	214	205	215	47	18	28	148	227	210	113.19	31	195	6.381	2.674	2.15149e-15	9.92239e-15	0.0563	0.0252
AT5G52710.2	protein_coding	-	-	3	0	0	17	6	3	4	0	0	12	7	3	4.2	1	7	6.38	2.674	0.00601128	0.0110286	0.2464	0.2326
AT5G05365.1	protein_coding	-	-	52	69	82	554	483	566	66	74	90	384	534	554	283.62	77	491	6.373	2.672	5.64807e-50	7.87941e-49	0.0149	0.0171
AT1G02070.1	protein_coding	-	-	8	6	6	56	48	59	10	6	7	39	53	58	28.8	8	50	6.367	2.671	4.47365e-10	1.54848e-09	0.0641	0.0789
AT2G36630.1	protein_coding	-	-	473	608	769	5683	4102	4904	603	653	840	3938	4536	4797	2561.33	699	4424	6.369	2.671	1.11358e-81	3.08092e-80	0.0117	0.0126
AT5G18780.2	protein_coding	-	-	72	63	55	670	423	463	92	68	60	464	468	453	267.42	73	462	6.369	2.671	6.95938e-44	8.26234e-43	0.0176	0.0173
AT1G12130.1	protein_coding	-	-	2	1	0	10	8	8	3	1	0	7	9	8	4.54	1	8	6.364	2.67	0.00267374	0.00516843	0.2076	0.2317
AT5G24090.1	protein_coding	ATCHIA, CHIA	chitinase A	18	11	17	154	92	131	23	12	19	107	102	128	64.99	18	112	6.365	2.67	9.39193e-18	4.86575e-17	0.0379	0.0382
AT1G07460.2	protein_coding	-	-	0	2	0	5	6	4	0	2	0	3	7	4	2.69	1	5	6.361	2.669	0.0141479	0.024508	0.2843	0.2728
AT3G48840.1	protein_coding	-	-	2	0	1	8	8	10	3	0	1	6	9	10	4.64	1	8	6.357	2.668	0.00318289	0.00608452	0.225	0.2314
AT2G14095.1	protein_coding	-	-	6	8	10	70	78	46	8	9	11	49	86	45	34.49	9	60	6.352	2.667	6.40761e-11	2.33278e-10	0.0604	0.068
AT1G76520.2	protein_coding	PILS3	PIN-LIKES 3	735	923	962	7798	6249	6836	937	992	1051	5404	6910	6687	3663.5	993	6334	6.349	2.666	2.84671e-80	7.62693e-79	0.0121	0.0131
AT5G44610.2	protein_coding	MAP18, PCAP2	PLASMA MEMBRANE ASSOCIATED CA2+-BINDING PROTEIN-2, microtubule-associated protein 18	94	42	37	478	369	452	120	45	40	331	408	442	231.13	68	394	6.347	2.666	5.46309e-16	2.59878e-15	0.0587	0.018
AT1G49900.1	protein_coding	-	-	13	14	11	89	93	123	17	15	12	62	103	120	54.74	15	95	6.341	2.665	4.24606e-14	1.83552e-13	0.0499	0.0451
AT4G05018.1	protein_coding	-	-	0	2	0	7	3	7	0	2	0	5	3	7	2.86	1	5	6.344	2.665	0.0180026	0.030624	0.3545	0.265
AT5G26340.1	protein_coding	MSS1, ATSTP13, STP13	SUGAR TRANSPORT PROTEIN 13	627	774	618	5772	4961	5324	799	832	675	4000	5486	5208	2833.33	769	4898	6.339	2.664	7.70277e-65	1.52696e-63	0.015	0.0127
AT5G67600.1	protein_coding	WIH1	WINDHOSE 1	317	317	310	2418	2398	2717	404	341	339	1676	2652	2658	1344.76	361	2329	6.335	2.663	3.32271e-45	4.10148e-44	0.0211	0.0128
AT2G21187.2	lncRNA		other RNA	13	10	13	119	77	97	17	11	14	82	85	95	50.67	14	87	6.321	2.66	1.70884e-15	7.92405e-15	0.0413	0.0477
AT5G26120.1	protein_coding	ASD2, ATASD2	alpha-L-arabinofuranosidase 2, ARABIDOPSIS THALIANA ALPHA-L-ARABINOFURANOSIDASE 2	0	3	0	6	5	10	0	3	0	4	6	10	3.78	1	7	6.315	2.659	0.0138571	0.024034	0.3636	0.2468
AT5G65550.1	protein_coding	-	-	0	1	1	5	4	8	0	1	1	3	4	8	2.98	1	5	6.315	2.659	0.00773486	0.0139766	0.2051	0.2647
AT4G03470.1	protein_coding	-	-	2	0	0	6	6	5	3	0	0	4	7	5	3.04	1	5	6.311	2.658	0.0167341	0.0286229	0.3547	0.2646
AT4G01540.4	protein_coding	NTM1, ANAC068	Arabidopsis NAC domain containing protein 68, NAC with transmembrane motif1	68	72	78	784	493	497	87	77	85	543	545	486	303.99	83	525	6.305	2.657	5.91334e-53	8.7793e-52	0.014	0.0168
AT1G69840.3	protein_coding	-	-	477	502	472	4015	3505	4012	608	539	516	2782	3876	3925	2040.99	554	3528	6.305	2.656	1.4805e-56	2.42312e-55	0.0169	0.0125
AT2G31585.2	ncRNA		other RNA	31	38	30	295	224	269	40	41	33	204	248	263	138.07	38	238	6.3	2.655	1.2746e-29	1.01111e-28	0.0239	0.0223
AT1G16510.1	protein_coding	SAUR41	SMALL AUXIN UPREGULATED 41	27	37	22	289	193	205	34	40	24	200	213	201	118.74	33	205	6.295	2.654	1.45586e-26	1.04041e-25	0.0264	0.0243
AT5G28237.2	protein_coding	-	-	7	2	2	48	27	17	9	2	2	33	30	17	15.5	4	27	6.29	2.653	1.93741e-06	5.17735e-06	0.0996	0.1232
AT1G04187.1	snoRNA			7	9	2	48	33	66	9	10	2	33	36	65	25.85	7	45	6.284	2.652	4.55424e-07	1.27642e-06	0.1115	0.086
AT3G54950.1	protein_coding	PLA IIIA, pPLAIIIbeta, PLP7	patatin-related phospholipase IIIbeta, patatin-like protein 6, PATATIN-LIKE PROTEIN 7	205	271	228	2284	1613	1707	261	291	249	1583	1784	1670	972.98	267	1679	6.286	2.652	8.96613e-80	2.37492e-78	0.0109	0.0134
AT4G19390.1	protein_coding	-	-	196	227	252	2138	1531	1697	250	244	275	1482	1693	1660	933.96	256	1612	6.283	2.651	4.90523e-77	1.23719e-75	0.0112	0.0135
AT5G03435.2	protein_coding	-	-	2	2	3	23	21	14	3	2	3	16	23	14	10.14	3	18	6.279	2.651	2.48478e-05	6.01226e-05	0.1105	0.1621
AT1G80730.1	protein_coding	ATZFP1, ZFP1	zinc-finger protein 1, ARABIDOPSIS THALIANA ZINC-FINGER PROTEIN 1	7	11	4	74	43	60	9	12	4	51	48	59	30.44	8	53	6.277	2.65	8.20325e-10	2.79378e-09	0.069	0.0743
AT5G51160.1	protein_coding	-	-	7	6	4	47	44	45	9	6	4	33	49	44	24.16	6	42	6.279	2.65	6.55093e-09	2.09941e-08	0.071	0.0912
AT1G49405.1	protein_coding	CASPL5C3	CASP-like protein 5C3	9	15	7	106	61	82	11	16	8	73	67	80	42.73	12	73	6.27	2.649	1.20403e-12	4.82215e-12	0.053	0.0553
AT3G04070.1	protein_coding	NAC047, SHYG, SHG, ANAC047	NAC domain containing protein 47, SPEEDY HYPONASTIC GROWTH	125	132	136	1024	926	1157	159	142	149	710	1024	1132	552.53	150	955	6.271	2.649	7.50812e-51	1.06658e-49	0.0168	0.0149
AT5G26731.1	protein_coding	-	-	40	55	35	327	346	337	51	59	38	227	383	330	181.2	49	313	6.273	2.649	9.77397e-31	8.04318e-30	0.0247	0.0197
AT3G08485.1	snoRNA			152	170	160	1063	919	2079	194	183	175	737	1016	2034	722.98	184	1262	6.263	2.647	1.6599e-26	1.18502e-25	0.0357	0.0142
AT3G25870.1	protein_coding	-	-	74	90	108	829	584	731	94	97	118	575	646	715	374.07	103	645	6.263	2.647	2.07347e-61	3.80559e-60	0.0121	0.0161
AT2G23810.1	protein_coding	TET8	tetraspanin8	626	644	615	4371	4966	5551	798	692	672	3029	5491	5430	2685.4	721	4650	6.259	2.646	9.31399e-38	9.4153e-37	0.0259	0.0126
AT5G07390.1	protein_coding	ATRBOHA, RBOHA	respiratory burst oxidase homolog A	14	19	3	115	69	89	18	20	3	80	76	87	47.43	14	81	6.261	2.646	1.03808e-09	3.50761e-09	0.0848	0.0506
AT1G17180.1	protein_coding	GSTU25, ATGSTU25	glutathione S-transferase TAU 25	14	12	4	68	74	91	18	13	4	47	82	89	42.18	12	73	6.251	2.644	1.25597e-08	3.94374e-08	0.0961	0.0572
AT2G29420.1	protein_coding	GST25, ATGSTU7, GSTU7	glutathione S-transferase tau 7, GLUTATHIONE S-TRANSFERASE 25	174	211	175	1690	1249	1486	222	227	191	1171	1381	1454	774.28	213	1335	6.25	2.644	8.61385e-65	1.70515e-63	0.0133	0.014
AT4G21680.1	protein_coding	AtNPF7.2, NPF7.2, NRT1.8	NRT1/ PTR family 7.2, NITRATE TRANSPORTER 1.8	344	474	253	3145	2521	2571	438	509	276	2180	2788	2515	1451.07	408	2494	6.249	2.644	7.3788e-50	1.02734e-48	0.0189	0.0127
AT5G40720.1	protein_coding	-	-	73	89	80	757	607	550	93	96	87	525	671	538	334.99	92	578	6.253	2.644	4.49082e-55	7.12494e-54	0.0135	0.0164
AT1G67340.1	protein_coding	-	-	254	279	278	2329	1877	2186	324	300	304	1614	2075	2138	1125.88	309	1942	6.245	2.643	5.13553e-67	1.06562e-65	0.0134	0.0131
AT1G75810.1	protein_coding	-	-	94	115	103	879	688	892	120	124	113	609	761	873	433.07	119	748	6.248	2.643	8.60463e-56	1.38481e-54	0.0143	0.0156
AT1G10220.2	protein_coding	-	-	2	3	3	29	14	24	3	3	3	20	15	23	11.35	3	19	6.241	2.642	7.10409e-06	1.80792e-05	0.0954	0.15
AT5G18310.3	protein_coding	-	-	209	301	303	2299	1898	2118	266	323	331	1593	2099	2072	1114.13	307	1921	6.242	2.642	6.00967e-82	1.68433e-80	0.0106	0.0132
AT1G66440.1	protein_coding	-	-	7	12	4	75	43	65	9	13	4	52	48	64	31.55	9	55	6.236	2.641	1.8048e-09	5.99549e-09	0.0743	0.0721
AT3G02940.2	protein_coding	MYB107, AtMYB107	myb domain protein 107	9	4	5	75	30	46	11	4	5	52	33	45	25.23	7	43	6.233	2.64	1.53326e-09	5.1147e-09	0.0625	0.0857
AT1G49832.1	ncRNA			5	9	11	80	50	67	6	10	12	55	55	66	34.06	9	59	6.228	2.639	8.69019e-12	3.32795e-11	0.0518	0.0676
AT4G14400.1	protein_coding	ACD6	ACCELERATED CELL DEATH 6	93	166	101	953	907	880	119	178	110	660	1003	861	488.58	136	841	6.231	2.639	1.90143e-60	3.41366e-59	0.0132	0.0153
AT2G39710.1	protein_coding	-	-	197	250	224	1867	1578	1796	251	269	245	1294	1745	1757	926.69	255	1599	6.225	2.638	3.31256e-68	7.08376e-67	0.0128	0.0135
AT1G48260.2	protein_coding	CIPK17, SnRK3.21	SNF1-RELATED PROTEIN KINASE 3.21, CBL-interacting protein kinase 17	83	70	135	751	701	743	106	75	148	520	775	727	391.82	110	674	6.222	2.637	1.3718e-35	1.30913e-34	0.0242	0.0159
AT1G67030.1	protein_coding	ZFP6	zinc finger protein 6	75	60	36	555	317	479	96	64	39	385	351	469	233.85	66	402	6.221	2.637	2.78512e-23	1.78963e-22	0.0373	0.0179
AT5G05085.1	protein_coding	-	-	3	2	1	21	20	9	4	2	1	15	22	9	8.76	2	15	6.219	2.637	9.84913e-05	0.000225037	0.1246	0.1753
AT1G17250.1	protein_coding	RFO2, AtRLP3, RLP3	RESISTANCE TO FUSARIUM OXYSPORUM 2, receptor like protein 3	20	35	23	278	179	162	25	38	25	193	198	158	106.22	29	183	6.218	2.636	2.73057e-25	1.87382e-24	0.0266	0.026
AT3G04065.1	lncRNA			0	7	1	16	15	18	0	8	1	11	17	18	8.98	3	15	6.217	2.636	0.000757157	0.00156912	0.2183	0.1734
AT3G15670.1	protein_coding	LEA76	Late Embryogenesis Accumulating 76	5	2	5	44	20	35	6	2	5	30	22	34	16.81	4	29	6.216	2.636	1.9422e-07	5.60287e-07	0.0767	0.1168
AT5G42210.1	protein_coding	-	-	42	29	50	423	224	322	54	31	55	293	248	315	165.86	47	285	6.218	2.636	2.52413e-33	2.25784e-32	0.0212	0.0203
AT4G05100.1	protein_coding	MYB74, AtMYB74	myb domain protein 74	24	16	10	193	100	110	31	17	11	134	111	108	68.44	20	118	6.21	2.635	5.67759e-17	2.83231e-16	0.0406	0.0364
AT2G25460.2	protein_coding	-	-	10	11	6	88	63	63	13	12	7	61	70	62	37.23	11	64	6.204	2.633	3.85514e-12	1.50435e-11	0.0518	0.0629
AT2G32030.1	protein_coding	-	-	16	7	11	75	82	110	20	8	12	52	91	108	48.36	13	84	6.202	2.633	8.65856e-10	2.94382e-09	0.0818	0.0506
AT1G80660.2	protein_coding	HA9, AHA9	H(+)-ATPase 9	1	6	1	15	14	30	1	6	1	10	15	29	10.67	3	18	6.197	2.631	0.000273022	0.000594943	0.1806	0.1589
AT1G29050.1	protein_coding	TBL38	TRICHOME BIREFRINGENCE-LIKE 38	263	268	238	2251	1785	1974	335	288	260	1560	1974	1931	1058	294	1822	6.183	2.628	1.41586e-58	2.41629e-57	0.0153	0.0133
at1g07243	miRNA			6	5	8	53	40	56	8	5	9	37	44	55	26.25	7	45	6.17	2.625	6.22136e-10	2.13519e-09	0.0588	0.0849
AT4G13510.1	protein_coding	AMT1;1, ATAMT1, ATAMT1;1	ammonium transporter 1;1, ARABIDOPSIS THALIANA AMMONIUM TRANSPORT 1	809	1003	844	7750	6168	6698	1031	1078	922	5371	6820	6552	3629.09	1010	6248	6.165	2.624	7.27222e-71	1.6299e-69	0.0134	0.013
AT2G40790.1	protein_coding	CXXS2, ATCXXS2	C-terminal cysteine residue is changed to a serine 2	1	0	4	17	10	11	1	0	4	12	11	11	6.54	2	11	6.159	2.623	0.00123331	0.00249345	0.2074	0.1987
[truncated: 15,138 more rows]

## Sheet: OXRSH1-N vs WT-N
Id				wt_1	wt_2	wt_3	oxrsh1_1	oxrsh1_2	oxrsh1_3	norm.wt_1	norm.wt_2	norm.wt_3	norm.oxrsh1_1	norm.oxrsh1_2	norm.oxrsh1_3	baseMean	WT	OXRSH1	FC	log2FoldChange	pvalue	padj	tagwise.dispersion	trended.dispersion
AT4G02260.3	protein_coding	RSH1, ATRSH1, AT-RSH1	RELA/SPOT homolog 1, RELA-SPOT HOMOLOG 1, RELA/SPOT HOMOLOG 1	2642	1407	1459	184098	151948	130913	1725	1454	1338	203984	202084	173201	97297.7	1506	193090	128.579	7.007	8.73344e-174	2.42606e-169	0.0264	0.0302
AT5G44567.1	protein_coding	-	-	0	0	0	13	0	6	0	0	0	14	0	8	3.72	0	7	67.039	6.067	5.11814e-06	0.000190331	0.2046	0.2464
AT1G14550.1	protein_coding	-	-	0	1	0	34	6	2	0	1	0	38	8	3	8.22	0	16	40.569	5.342	3.33124e-08	2.15708e-06	0.1303	0.1404
AT2G40990.1	protein_coding	-	-	1	0	0	13	9	11	1	0	0	14	12	15	6.93	0	14	35.543	5.151	1.18919e-08	8.44869e-07	0.1365	0.1677
AT4G07526.2	protein_coding	-	-	0	0	0	5	1	3	0	0	0	6	1	4	1.81	0	4	31.698	4.986	0.000604598	0.0103546	0.3147	0.3474
AT4G12860.1	protein_coding	UNE14	unfertilized embryo sac 14	0	0	0	4	0	3	0	0	0	4	0	4	1.4	0	3	24.695	4.626	0.00270385	0.0322916	0.3657	0.3772
AT4G10950.2	protein_coding	-	-	0	0	0	3	2	2	0	0	0	3	3	3	1.44	0	3	24.421	4.61	0.00190502	0.0248682	0.3679	0.3771
AT3G23245.1	protein_coding	-	-	0	0	0	4	3	0	0	0	0	4	4	0	1.4	0	3	23.617	4.562	0.00315618	0.0362595	0.37	0.3772
AT3G22100.1	protein_coding	-	-	0	0	0	2	4	1	0	0	0	2	5	1	1.48	0	3	22.904	4.518	0.00264801	0.0318576	0.374	0.377
AT3G02015.1	lncRNA			0	0	0	0	4	3	0	0	0	0	5	4	1.55	0	3	21.067	4.397	0.00428216	0.0447701	0.3805	0.3767
AT2G16520.1	protein_coding	-	-	0	0	0	2	2	2	0	0	0	2	3	3	1.25	0	3	20.763	4.376	0.00378352	0.0409596	0.3984	0.3938
AT2G30766.1	protein_coding	-	-	0	0	0	2	2	2	0	0	0	2	3	3	1.25	0	3	20.763	4.376	0.00377713	0.0409063	0.3978	0.3938
AT5G45180.1	protein_coding	-	-	1	0	2	21	7	7	1	0	2	23	9	9	7.39	1	14	15.161	3.922	8.25755e-07	3.80117e-05	0.1389	0.1546
AT2G44240.1	protein_coding	-	-	1	1	2	22	16	6	1	1	2	24	21	8	9.52	1	18	13.998	3.807	5.12299e-08	3.19801e-06	0.1092	0.1282
AT1G61120.1	protein_coding	GES, TPS4, TPS04	terpene synthase 04, GERANYLLINALOOL SYNTHASE, TERPENE SYNTHASE 4	19	15	6	236	78	72	12	16	6	261	104	95	82.32	11	153	13.602	3.766	2.90352e-32	4.74453e-29	0.0346	0.0233
AT4G17565.1	protein_coding	-	-	1	0	0	2	4	7	1	0	0	2	5	9	2.91	0	5	12.936	3.693	0.00129816	0.0184836	0.2794	0.2889
AT1G66870.1	protein_coding	-	-	0	0	1	4	4	4	0	0	1	4	5	5	2.66	0	5	12.877	3.687	0.00112298	0.0165961	0.2671	0.299
AT5G53230.1	protein_coding	-	-	1	2	0	6	9	15	1	2	0	7	12	20	6.86	1	13	12.35	3.626	7.76142e-06	0.000274306	0.1578	0.1712
AT3G44785.1	protein_coding	-	-	0	0	1	3	6	3	0	0	1	3	8	4	2.7	0	5	12.183	3.607	0.00163688	0.0219905	0.2786	0.2989
AT3G49340.1	protein_coding	-	-	17	7	4	80	73	65	11	7	4	89	97	86	48.95	7	91	11.923	3.576	1.40795e-25	1.26166e-22	0.037	0.0331
AT2G39030.1	protein_coding	NATA1	N-acetyltransferase activity 1	1	2	2	23	4	18	1	2	2	25	5	24	9.86	2	18	11.545	3.529	3.09472e-07	1.60989e-05	0.1145	0.124
AT1G33950.2	protein_coding	-	-	0	0	2	9	9	2	0	0	2	10	12	3	4.4	1	8	11.39	3.51	0.0013188	0.0186894	0.3501	0.2257
AT5G46950.1	protein_coding	-	-	1	13	3	48	16	49	1	13	3	53	21	65	26.02	6	46	10.672	3.416	4.7949e-06	0.000180485	0.2223	0.0546
AT2G24850.1	protein_coding	TAT, TAT3	TYROSINE AMINOTRANSFERASE, tyrosine aminotransferase 3	76	46	59	531	428	255	50	48	54	588	569	337	274.37	51	498	9.659	3.272	2.97862e-58	2.75811e-54	0.019	0.0144
AT1G58300.1	protein_coding	HO4	heme oxygenase 4	2	0	0	8	2	3	1	0	0	9	3	4	2.8	0	5	9.501	3.248	0.00221691	0.027803	0.2365	0.2802
AT1G58330.1	protein_coding	ZW2		0	1	1	8	6	2	0	1	1	9	8	3	3.57	1	7	9.228	3.206	0.00117967	0.0171445	0.2247	0.2539
AT4G04510.2	protein_coding	CRK38	cysteine-rich RLK (RECEPTOR-like protein kinase) 38	6	8	11	47	65	31	4	8	10	52	86	41	33.64	7	60	8.002	3	1.46425e-14	2.82467e-12	0.0512	0.0442
AT4G12490.1	protein_coding	AZI3		16	12	4	59	63	43	10	12	4	65	84	57	38.76	9	69	7.76	2.956	9.7102e-18	2.96417e-15	0.0384	0.0392
AT5G64790.1	protein_coding	-	-	3	0	3	8	27	4	2	0	3	9	36	5	9.13	2	17	7.206	2.849	0.00046305	0.00833099	0.2157	0.135
AT5G24540.1	protein_coding	BGLU31	beta glucosidase 31	1	1	6	12	16	9	1	1	6	13	21	12	8.95	3	15	6.893	2.785	0.000115336	0.00267303	0.1791	0.1351
ATCG01020.1	protein_coding	RPL32	ribosomal protein L32	3589	3136	4617	19607	11108	22832	2343	3241	4234	21725	14773	30207	12754	3273	22235	6.711	2.746	4.74843e-39	1.31907e-35	0.0274	0.0193
AT1G14880.1	protein_coding	PCR1, AtPCR1	PLANT CADMIUM RESISTANCE 1	502	696	918	3450	3074	2611	328	719	842	3823	4088	3454	2209.06	630	3788	6.448	2.689	4.16202e-30	5.50556e-27	0.0337	0.0131
AT3G60470.1	protein_coding	-	-	10	1	4	23	24	15	7	1	4	25	32	20	14.75	4	26	6.446	2.688	3.65475e-07	1.85604e-05	0.0906	0.0867
AT3G57260.2	protein_coding	AtBG2, PR-2, AtPR2, BG2, PR2, BGL2	"beta-1,3-glucanase 2", PATHOGENESIS-RELATED PROTEIN 2, BETA-1,3-GLUCANASE 2	553	636	587	2728	3016	2128	361	657	538	3023	4011	2815	1900.99	519	3283	6.437	2.686	2.05013e-63	2.84753e-59	0.0154	0.0128
AT3G46090.1	protein_coding	ZAT7		2	13	7	28	50	19	1	13	6	31	66	25	23.97	7	41	6.383	2.674	2.25896e-09	1.87319e-07	0.0678	0.0589
AT1G26410.1	protein_coding	AtBBE6		9	1	2	22	14	10	6	1	2	24	19	13	10.83	3	19	6.203	2.633	3.69373e-06	0.000142899	0.0907	0.1106
ATCG00870.1	protein_coding	ORF77.1		118	94	118	503	333	567	77	97	108	557	443	750	338.8	94	583	6.162	2.623	3.11729e-52	2.16488e-48	0.0149	0.0138
AT5G42325.1	protein_coding	-	-	2	0	1	6	4	3	1	0	1	7	5	4	3.03	1	5	6.086	2.606	0.00491397	0.0495842	0.1876	0.2711
AT2G38255.1	protein_coding	-	-	3	1	1	6	5	11	2	1	1	7	7	15	5.29	1	10	6.066	2.601	0.000722431	0.0118328	0.149	0.1983
AT5G52390.1	protein_coding	-	-	201	71	77	591	469	281	131	73	71	655	624	372	320.93	92	550	5.984	2.581	7.60118e-46	3.51922e-42	0.0167	0.0139
AT1G04370.1	protein_coding	ATERF14, ERF97, ERF14	Ethylene-responsive element binding factor 14	0	7	1	10	12	6	0	7	1	11	16	8	7.19	3	12	5.951	2.573	0.00143695	0.0200286	0.2292	0.1608
ATCG01270.1	protein_coding	ORF77.2		104	93	119	449	318	516	68	96	109	498	423	683	312.71	91	535	5.895	2.56	4.20359e-48	2.33543e-44	0.0155	0.014
AT5G52770.1	protein_coding	-	-	5	1	2	11	14	6	3	1	2	12	19	8	7.48	2	13	5.592	2.483	0.000166014	0.00360773	0.1185	0.1521
AT3G15536.1	ncRNA		Unknown gene	49	52	44	257	148	138	32	54	40	285	197	183	131.71	42	222	5.316	2.41	3.25618e-22	1.84599e-19	0.0299	0.0184
ATCG00590.1	protein_coding	ORF31		875	921	1800	3424	1742	10156	571	952	1651	3794	2317	13437	3786.87	1058	6516	5.133	2.36	4.84035e-18	1.51079e-15	0.0454	0.0144
AT1G52130.1	protein_coding	-	-	6	1	5	21	10	10	4	1	5	23	13	13	9.89	3	16	5.11	2.353	3.16009e-05	0.000901274	0.0879	0.1191
ATCG00210.1	protein_coding	YCF6		8163	6356	6289	30581	21122	20604	5329	6570	5768	33884	28091	27260	17816.9	5889	29745	5.046	2.335	2.32234e-37	4.96249e-34	0.0217	0.0209
AT5G15480.1	protein_coding	-	-	2	3	0	6	7	4	1	3	0	7	9	5	4.28	1	7	4.914	2.297	0.0044782	0.0462797	0.1645	0.2263
AT3G12230.1	protein_coding	scpl14	serine carboxypeptidase-like 14	7	3	9	28	14	20	5	3	8	31	19	26	15.34	5	25	4.843	2.276	8.78362e-07	4e-05	0.0626	0.083
AT3G14030.1	protein_coding	-	-	15	9	8	38	33	33	10	9	7	42	44	44	26.01	9	43	4.822	2.27	3.01104e-10	3.00877e-08	0.0396	0.0534
AT5G63225.1	protein_coding	-	-	8	14	21	67	48	30	5	14	19	74	64	40	36.12	13	59	4.802	2.264	3.17816e-07	1.63929e-05	0.0894	0.0409
AT5G42290.1	protein_coding	-	-	5	0	2	9	6	6	3	0	2	10	8	8	5.16	2	9	4.801	2.263	0.00263754	0.0317866	0.158	0.1943
AT2G29110.2	protein_coding	GLR2.8, ATGLR2.8	glutamate receptor 2.8	9	4	9	22	34	18	6	4	8	24	45	24	18.61	6	31	4.789	2.26	7.15722e-07	3.35279e-05	0.0705	0.0715
AT4G31970.1	protein_coding	CYP82C2	"cytochrome P450, family 82, subfamily C, polypeptide 2"	3	10	0	6	45	0	2	10	0	7	60	0	13.13	4	22	4.783	2.258	0.000208326	0.00436013	0.0756	0.1004
AT5G39720.2	protein_coding	AIG2L	avirulence induced gene 2 like protein	6	5	8	16	36	15	4	5	7	18	48	20	16.98	5	29	4.776	2.256	1.91882e-06	8.03966e-05	0.0715	0.0783
AT3G11480.1	protein_coding	BSMT1, ATBSMT1		4	3	7	36	3	15	3	3	6	40	4	20	12.64	4	21	4.747	2.247	0.000338851	0.00647535	0.1306	0.0965
ATCG00600.1	protein_coding	PETG		1799	1672	2559	6799	3756	10150	1174	1728	2347	7533	4995	13429	5201.14	1750	8652	4.748	2.247	1.703e-26	1.57692e-23	0.0283	0.0155
AT3G44350.2	protein_coding	anac061, NAC061	NAC domain containing protein 61	17	16	24	80	64	44	11	17	22	89	85	58	46.94	17	77	4.74	2.245	1.73009e-11	2.03645e-09	0.0465	0.0336
AT2G33020.1	protein_coding	RLP24, AtRLP24	receptor like protein 24	4	2	2	12	14	2	3	2	2	13	19	3	6.85	2	12	4.662	2.221	0.00101769	0.0153978	0.116	0.1617
AT3G45860.1	protein_coding	CRK4	cysteine-rich RLK (RECEPTOR-like protein kinase) 4	83	107	119	349	348	280	54	111	109	387	463	370	248.98	91	407	4.629	2.211	2.29416e-27	2.27605e-24	0.0223	0.0148
AT5G52670.1	protein_coding	-	-	3	4	1	10	8	7	2	4	1	11	11	9	6.33	2	10	4.504	2.171	0.00114538	0.0167992	0.118	0.1723
AT3G41768.1	rRNA		rRNA	18	5	11	67	15	24	12	5	10	74	20	32	25.49	9	42	4.494	2.168	2.74003e-08	1.80368e-06	0.048	0.0526
ATCG00630.1	protein_coding	PSAJ		12572	9751	11007	43213	27365	31700	8207	10079	10095	47881	36394	41940	25765.8	9460	42072	4.439	2.15	1.95053e-28	2.16735e-25	0.0248	0.0228
AT1G52857.2	protein_coding	-	-	3	2	3	14	3	8	2	2	3	16	4	11	6.14	2	10	4.292	2.102	0.00209037	0.0266003	0.1197	0.1727
AT2G19500.1	protein_coding	CKX2, ATCKX2	cytokinin oxidase 2	13	36	15	49	72	60	8	37	14	54	96	79	48.15	20	76	4.288	2.1	1.08751e-10	1.17549e-08	0.0443	0.0333
ATCG00050.1	protein_coding	RPS16	ribosomal protein S16	364	272	266	1039	708	880	238	281	244	1151	942	1164	669.97	254	1086	4.271	2.095	5.02203e-44	1.99296e-40	0.0132	0.0126
AT4G04500.3	protein_coding	CRK37	cysteine-rich RLK (RECEPTOR-like protein kinase) 37	118	100	68	274	404	174	77	103	62	304	537	230	218.98	81	357	4.258	2.09	2.03648e-32	3.5357e-29	0.0148	0.0153
AT1G58225.1	protein_coding	-	-	80	115	99	299	336	210	52	119	91	331	447	278	219.65	87	352	4.161	2.057	1.01252e-23	7.03171e-21	0.0222	0.0153
AT5G24110.1	protein_coding	WRKY30, ATWRKY30	WRKY DNA-binding protein 30, ARABIDOPSIS THALIANA WRKY DNA-BINDING PROTEIN 30	24	22	20	51	81	58	16	23	18	57	108	77	49.62	19	81	4.138	2.049	1.09512e-13	1.85496e-11	0.0266	0.0324
AT2G13810.1	protein_coding	AtALD1, EDTS5, ALD1	eds two suppressor 5, AGD2-like defense response protein 1	44	79	49	168	160	149	29	82	45	186	213	197	125.23	52	199	4.128	2.045	1.31632e-16	3.41738e-14	0.0309	0.0188
AT5G59580.1	protein_coding	UGT76E1	UDP-glucosyl transferase 76E1	3	1	7	16	6	8	2	1	6	18	8	11	7.62	3	12	4.112	2.04	0.0029074	0.0341067	0.1563	0.1465
AT5G38250.1	protein_coding	-	-	35	35	36	88	104	105	23	36	33	98	138	139	77.8	31	125	4.081	2.029	1.03202e-18	3.58355e-16	0.0201	0.0241
AT1G09080.1	protein_coding	BIP3	binding protein 3	66	27	44	120	164	87	43	28	40	133	218	115	96.25	37	155	4.003	2.001	6.34673e-13	9.47881e-11	0.0385	0.0213
AT4G23140.1	protein_coding	CRK6	cysteine-rich RLK (RECEPTOR-like protein kinase) 6	274	285	222	772	841	530	179	295	204	855	1118	701	558.69	226	891	3.976	1.991	6.21366e-42	1.91788e-38	0.0122	0.0128
AT2G29100.2	protein_coding	GLR2.9, ATGLR2.9	GLUTAMATE RECEPTOR 2.9, glutamate receptor 2.9	13	5	10	35	22	18	8	5	9	39	29	24	19.11	7	31	3.974	1.99	1.25653e-06	5.49688e-05	0.0528	0.0679
AT3G24900.2	protein_coding	AtRLP39, RLP39	receptor like protein 39	103	39	58	172	268	104	67	40	53	191	356	138	140.89	53	228	3.942	1.979	1.51844e-11	1.79492e-09	0.0467	0.0178
AT3G53232.1	protein_coding	RTFL1, DVL20	DEVIL 20, ROTUNDIFOLIA like 1	10	11	15	35	26	36	7	11	14	39	35	48	25.44	11	41	3.928	1.974	7.8057e-08	4.69339e-06	0.0451	0.0543
AT3G28890.2	protein_coding	AtRLP43, RLP43	receptor like protein 43	67	48	51	178	147	113	44	50	47	197	196	150	113.73	47	181	3.866	1.951	3.44233e-21	1.70758e-18	0.0183	0.0196
ATCG00100.1	tRNA	TRNG.1	tRNA-Gly	3678	2905	2940	11138	7039	7304	2401	3003	2696	12341	9362	9663	6577.65	2700	10455	3.858	1.948	1.59455e-29	1.92587e-26	0.0197	0.0164
AT3G25010.2	protein_coding	AtRLP41, RLP41	receptor like protein 41	652	476	416	1424	1746	882	426	492	382	1578	2322	1167	1060.99	433	1689	3.775	1.916	4.47311e-38	1.03549e-34	0.0136	0.0123
AT2G30190.1	tRNA		pre-tRNA	2	3	4	9	5	10	1	3	4	10	7	13	6.32	3	10	3.761	1.911	0.00338607	0.0378517	0.1121	0.1723
AT4G10500.1	protein_coding	DLO1	DMR6-LIKE OXYGENASE 1	204	180	152	495	516	363	133	186	139	548	686	480	362.27	153	571	3.747	1.906	2.88942e-38	7.29684e-35	0.0114	0.0136
AT2G23170.1	protein_coding	GH3.3		163	203	155	444	474	400	106	210	142	492	630	529	351.66	153	550	3.714	1.893	9.46441e-32	1.46062e-28	0.0142	0.0137
AT2G32200.2	protein_coding	-	-	1	8	12	16	19	14	1	8	11	18	25	19	13.57	7	21	3.666	1.874	0.00114889	0.0168239	0.1346	0.0936
AT1G65130.3	protein_coding	-	-	4	3	4	5	16	9	3	3	4	6	21	12	8.02	3	13	3.636	1.863	0.00219624	0.027606	0.1017	0.146
AT4G25110.1	protein_coding	MCP1c, AtMCP1c, MC2, AtMC2	metacaspase 1c, metacaspase 2	5	10	9	14	24	23	3	10	8	16	32	30	16.62	7	26	3.629	1.86	1.07853e-05	0.000365818	0.0499	0.0792
AT1G66960.1	protein_coding	LUP5		13	5	6	22	23	13	8	5	6	24	31	17	15.22	6	24	3.606	1.85	2.98818e-05	0.000861086	0.0588	0.0826
AT1G24147.1	protein_coding	-	-	90	131	166	331	319	283	59	135	152	367	424	374	251.97	115	388	3.594	1.846	3.00156e-16	7.58002e-14	0.0293	0.0147
AT5G46960.1	protein_coding	-	-	44	82	47	196	101	129	29	85	43	217	134	171	113.12	52	174	3.593	1.845	4.83104e-08	3.02938e-06	0.0628	0.0196
AT2G01010.1	rRNA		rRNA	23	5	13	63	12	25	15	5	12	70	16	33	25.16	11	40	3.59	1.844	9.29951e-07	4.16663e-05	0.0443	0.0526
AT1G17615.1	protein_coding	-	-	12	9	10	32	29	16	8	9	9	35	39	21	20.25	9	32	3.567	1.835	3.44856e-06	0.000134547	0.0495	0.0651
AT2G45760.1	protein_coding	BAP2, BAL	BON ASSOCIATION PROTEIN 1-LIKE, BON association protein 2	29	76	64	181	121	105	19	79	59	201	161	139	109.43	52	167	3.566	1.834	5.41452e-07	2.61128e-05	0.0743	0.02
AT5G10760.1	protein_coding	AED1	APOPLASTIC, EDS1-DEPENDENT 1	1780	1718	1562	5042	4351	3120	1162	1776	1433	5587	5787	4128	3311.89	1457	5167	3.56	1.832	1.88502e-28	2.16735e-25	0.018	0.014
AT1G23201.2	protein_coding	-	-	4	7	5	17	14	9	3	7	5	19	19	12	10.63	5	17	3.551	1.828	0.000587183	0.0101376	0.0864	0.1135
ATCG00450.1	tRNA	TRNV.1	tRNA-Val	1300	1056	992	3299	2386	2356	849	1091	910	3655	3173	3117	2132.59	950	3315	3.503	1.808	3.31681e-34	6.14252e-31	0.0143	0.013
AT1G16950.1	protein_coding	-	-	11	9	12	28	18	31	7	9	11	31	24	41	20.58	9	32	3.497	1.806	2.58165e-06	0.000104848	0.0451	0.0645
ATCG00890.1	protein_coding	NDHB.1		10045	5713	5741	18711	14507	15945	6557	5905	5265	20732	19294	21096	13141.5	5909	20374	3.459	1.79	8.74257e-28	8.99481e-25	0.0181	0.0194
AT1G44542.1	protein_coding	CYCLASE3	CYCLASE3	7	12	13	26	21	29	5	12	12	29	28	38	20.67	10	32	3.456	1.789	1.12155e-05	0.000377187	0.0578	0.0647
ATCG01040.1	protein_coding	YCF5		2728	2314	2564	7105	4333	6853	1781	2392	2351	7872	5763	9067	4870.98	2175	7567	3.454	1.788	3.29393e-23	2.12795e-20	0.0215	0.0152
AT4G23150.1	protein_coding	CRK7	cysteine-rich RLK (RECEPTOR-like protein kinase) 7	168	198	130	440	407	316	110	205	119	488	541	418	313.41	145	482	3.447	1.785	4.29281e-25	3.40715e-22	0.0164	0.014
ATCG01250.1	protein_coding	NDHB.2		9887	5850	5906	18509	14832	15679	6454	6047	5416	20508	19726	20744	13149.2	5972	20326	3.411	1.77	4.66617e-28	4.98545e-25	0.0175	0.0194
AT3G45130.4	protein_coding	LAS1	lanosterol synthase 1	8	2	2	12	7	7	5	2	2	13	9	9	6.83	3	10	3.395	1.763	0.00372735	0.0404461	0.0944	0.1562
AT3G13500.1	protein_coding	-	-	6	7	10	19	11	24	4	7	9	21	15	32	14.63	7	23	3.371	1.753	0.00012201	0.00279892	0.0638	0.0867
ATCG01120.1	protein_coding	RPS15	chloroplast ribosomal protein S15	693	319	400	1113	942	1030	452	330	367	1233	1253	1363	832.95	383	1283	3.363	1.75	9.53323e-35	1.8916e-31	0.0124	0.0124
ATCG00080.1	protein_coding	PSBI	photosystem II reaction center protein I	1690	1369	2065	3875	2266	6470	1103	1415	1894	4294	3014	8560	3379.88	1471	5289	3.356	1.747	3.61036e-19	1.37387e-16	0.025	0.0141
ATCG00380.1	protein_coding	RPS4	chloroplast ribosomal protein S4	6060	3224	3538	11016	8406	8803	3956	3332	3245	12206	11180	11647	7594.19	3511	11678	3.336	1.738	2.89879e-31	4.23819e-28	0.015	0.017
AT5G26690.1	protein_coding	-	-	134	169	163	382	345	333	87	175	149	423	459	441	289.05	137	441	3.334	1.737	5.23456e-21	2.55107e-18	0.0191	0.0142
AT2G43570.1	protein_coding	CHI	"chitinase, putative"	228	226	256	534	500	577	149	234	235	592	665	763	439.54	206	673	3.325	1.734	6.18617e-31	8.59229e-28	0.0127	0.0132
AT1G73010.1	protein_coding	PS2, ATPS2, AtPPsPase1, PPsPase1	pyrophosphate-specific phosphatase1, phosphate starvation-induced gene 2	120	90	72	169	327	163	78	93	66	187	435	216	179.2	79	279	3.318	1.73	5.73212e-17	1.5611e-14	0.0221	0.0163
AT1G57630.1	protein_coding	-	-	104	256	202	465	362	384	68	265	185	515	481	508	337.08	173	501	3.299	1.722	3.8306e-09	3.05777e-07	0.0516	0.0138
AT5G45890.1	protein_coding	SAG12, AtSAG12	senescence-associated gene 12	14603	9276	13929	29777	24149	29774	9533	9588	12774	32993	32117	39392	22732.9	10632	34834	3.294	1.72	1.66623e-24	1.25098e-21	0.0193	0.0222
AT4G18253.1	protein_coding	-	-	73	74	85	168	182	170	48	76	78	186	242	225	142.53	67	218	3.282	1.715	5.95677e-20	2.54574e-17	0.016	0.0177
ATCG01130.1	protein_coding	YCF1.2, TIC214	TRANSLOCON AT THE INNER ENVELOPE MEMBRANE OF CHLOROPLASTS 214	4333	2187	2825	6059	6008	8228	2829	2260	2591	6713	7990	10886	5544.93	2560	8530	3.279	1.713	2.19156e-22	1.26832e-19	0.0207	0.0157
AT2G33080.1	protein_coding	RLP28, AtRLP28	receptor like protein 28	38	28	19	56	75	57	25	29	17	62	100	75	51.4	24	79	3.272	1.71	5.16097e-10	4.87641e-08	0.0296	0.0313
AT1G70080.1	protein_coding	-	-	90	74	91	188	185	194	59	76	83	208	246	257	154.95	73	237	3.27	1.709	9.07601e-22	5.04245e-19	0.0144	0.0172
AT2G04515.1	protein_coding	-	-	30	55	37	126	81	69	20	57	34	140	108	91	74.83	37	113	3.264	1.707	1.70647e-07	9.40555e-06	0.0551	0.0245
ATCG00510.1	protein_coding	PSAI	photsystem I subunit I	4804	3776	6807	11529	6436	17426	3136	3903	6243	12774	8560	23055	9611.77	4427	14796	3.212	1.683	2.01857e-18	6.92269e-16	0.0247	0.018
AT5G43650.2	protein_coding	BHLH92		1	11	7	3	22	19	1	11	6	3	29	25	12.69	6	19	3.21	1.682	0.000933786	0.0144029	0.0672	0.1019
AT3G20110.1	protein_coding	CYP705A20	"cytochrome P450, family 705, subfamily A, polypeptide 20"	58	58	43	101	134	114	38	60	39	112	178	151	96.37	46	147	3.206	1.681	3.02697e-15	6.34879e-13	0.0192	0.0213
AT4G13395.1	protein_coding	DVL10, RTFL12	ROTUNDIFOLIA like 12, DEVIL 10	12	35	31	71	59	39	8	36	28	79	78	52	46.86	24	70	3.206	1.681	3.377e-05	0.00095822	0.0828	0.0334
ATCG00700.1	protein_coding	PSBN	photosystem II reaction center protein N	61265	43882	67931	143663	112903	117845	39994	45356	62300	159181	150156	155912	102150	49217	155083	3.207	1.681	3.03967e-15	6.34879e-13	0.0308	0.0305
AT1G65240.1	protein_coding	-	-	2	6	7	9	12	12	1	6	6	10	16	16	9.29	4	14	3.199	1.678	0.00236091	0.0291844	0.0879	0.1286
ATCG00300.1	protein_coding	YCF9		3022	1008	1551	4111	3455	3455	1973	1042	1422	4555	4595	4571	3026.36	1479	4574	3.193	1.675	1.62556e-21	8.68394e-19	0.0205	0.0138
AT2G04495.1	protein_coding	-	-	107	144	133	289	242	302	70	149	122	320	322	400	230.38	114	347	3.179	1.669	1.38804e-16	3.57023e-14	0.0227	0.0151
ATCG01280.1	protein_coding	YCF2.2		10568	4327	4767	14653	13059	11603	6899	4472	4372	16236	17368	15351	10783	5248	16318	3.178	1.668	1.69635e-20	7.85383e-18	0.0218	0.0185
ATCG00070.1	protein_coding	PSBK	photosystem II reaction center protein K precursor	6366	4660	4948	14173	9153	11431	4156	4817	4538	15704	12173	15124	9418.44	4504	14334	3.17	1.665	2.65638e-23	1.75694e-20	0.0189	0.0179
AT1G65500.1	protein_coding	-	-	254	278	329	682	607	548	166	287	302	756	807	725	507.14	252	763	3.127	1.645	9.2923e-21	4.45053e-18	0.0188	0.0129
AT5G60800.1	protein_coding	HIPP3	HEAVY METAL-ASSOCIATED ISOPRENYLATED PLANT PROTEIN3	26	22	33	55	82	41	17	23	30	61	109	54	49.04	23	75	3.128	1.645	1.57049e-07	8.77798e-06	0.0434	0.0324
ATCG00860.1	protein_coding	YCF2.1		10697	4283	4795	14405	12770	11444	6983	4427	4398	15961	16983	15141	10648.8	5269	16028	3.114	1.639	1.38684e-19	5.58333e-17	0.0221	0.0185
AT3G24982.1	protein_coding	ATRLP40, RLP40	receptor like protein 40	373	145	134	426	575	290	243	150	123	472	765	384	356.11	172	540	3.11	1.637	1.65086e-13	2.73694e-11	0.0295	0.0136
AT4G28420.2	protein_coding	-	-	11	6	6	18	15	15	7	6	6	20	20	20	13.1	6	20	3.099	1.632	0.000240528	0.00489497	0.0533	0.0934
AT5G44585.1	protein_coding	-	-	8	11	5	22	13	16	5	11	5	24	17	21	14	7	21	3.1	1.632	0.000776129	0.0124816	0.0829	0.0889
AT3G53160.1	protein_coding	UGT73C7	UDP-glucosyl transferase 73C7	63	34	30	85	76	99	41	35	28	94	101	131	71.67	35	109	3.097	1.631	3.32753e-10	3.24335e-08	0.0304	0.0251
AT1G13470.1	protein_coding	-	-	123	168	160	323	351	278	80	174	147	358	467	368	265.53	134	398	3.093	1.629	8.4922e-19	2.98614e-16	0.0188	0.0145
AT3G17690.2	protein_coding	ATCNGC19, CNGC19	CYCLIC NUCLEOTIDE-GATED CHANNEL 19, cyclic nucleotide gated channel 19	24	17	18	37	54	35	16	18	17	41	72	46	34.81	17	53	3.092	1.628	2.00853e-07	1.08974e-05	0.035	0.0418
ATCG00020.1	protein_coding	PSBA	photosystem II reaction center protein A	11245438	8312708	8480469	25317960	16382551	17927371	7341068	8591999	7777452	28052789	21788021	23718367	1.62116e+07	7903506	24519726	3.092	1.628	7.02532e-08	4.27038e-06	0.0622	0.0686
AT2G25510.1	protein_coding	-	-	1300	1843	1932	3496	3607	3450	849	1905	1772	3874	4797	4564	2960.1	1509	4412	3.088	1.627	6.98136e-20	2.93841e-17	0.0211	0.0137
ATCG00110.1	tRNA	TRNR.1	tRNA-Arg	12	4	9	16	11	25	8	4	8	18	15	33	14.28	7	22	3.087	1.626	0.000284197	0.00563103	0.0588	0.0872
AT2G41810.1	protein_coding	-	-	7	3	4	12	7	10	5	3	4	13	9	13	7.86	4	12	3.076	1.621	0.00324496	0.036872	0.0736	0.1416
AT3G47380.1	protein_coding	-	-	8	5	7	18	11	13	5	5	6	20	15	17	11.43	5	17	3.074	1.62	0.000626969	0.0106069	0.0601	0.1047
ATCG00140.1	protein_coding	ATPH		39039	23440	25373	73799	50847	54475	25485	24228	23270	81771	67624	72072	49074.8	24328	73822	3.027	1.598	2.24964e-18	7.4396e-16	0.0229	0.0263
AT4G02950.1	protein_coding	-	-	7	2	6	17	3	11	5	2	6	19	4	15	8.25	4	13	3.017	1.593	0.00482443	0.0490189	0.0816	0.1344
AT2G26400.2	protein_coding	ARD3, ARD, ATARD3	ACIREDUCTONE DIOXYGENASE, acireductone dioxygenase 3	103	153	155	385	234	241	67	158	142	427	311	319	237.36	122	352	3.008	1.589	4.62053e-09	3.60309e-07	0.0437	0.0149
AT5G44575.1	protein_coding	-	-	44	34	44	86	79	84	29	35	40	95	105	111	69.28	35	104	3.006	1.588	7.10431e-12	8.88966e-10	0.0209	0.0257
AT5G55460.1	protein_coding	AtLTP4.5		68	97	82	176	189	140	44	100	75	195	251	185	141.91	73	210	2.986	1.578	4.93226e-14	8.67173e-12	0.0221	0.0178
ATCG00240.1	tRNA	TRNY	tRNA-Tyr	13	4	9	24	18	10	8	4	8	27	24	13	14.11	7	21	2.971	1.571	0.000795607	0.0127115	0.0727	0.0865
ATCG00420.1	protein_coding	NDHJ	NADH dehydrogenase subunit J	8628	5682	5468	15767	11395	12397	5632	5873	5015	17470	15155	16402	10924.4	5507	16342	2.969	1.57	3.56931e-23	2.25345e-20	0.0171	0.0186
AT3G22910.1	protein_coding	ACA13	auto-inhibited Ca2+ ATPase 13	82	61	66	142	165	116	54	63	61	157	219	153	117.89	59	176	2.96	1.566	2.41605e-15	5.16273e-13	0.0174	0.0192
AT1G09932.2	protein_coding	-	-	192	218	198	443	457	335	125	225	182	491	608	443	345.68	177	514	2.954	1.563	2.76863e-21	1.42425e-18	0.0154	0.0137
AT5G22380.1	protein_coding	NAC090, anac090	NAC domain containing protein 90	19	24	17	47	37	37	12	25	16	52	49	49	33.84	18	50	2.946	1.559	2.20836e-06	9.08829e-05	0.042	0.0425
ATCG00040.1	protein_coding	MATK	maturase K	17315	11409	13155	30151	20646	33814	11303	11792	12064	33408	27458	44737	23460.5	11720	35201	2.944	1.558	7.56373e-17	2.00108e-14	0.0238	0.0223
AT1G17310.2	protein_coding	-	-	8	12	9	31	17	13	5	12	8	34	23	17	16.67	8	25	2.941	1.556	0.000959204	0.014697	0.0844	0.0761
AT3G59765.2	ncRNA		other RNA	7	5	12	16	14	17	5	5	11	18	19	22	13.26	7	20	2.914	1.543	0.000765162	0.0123649	0.063	0.0932
AT2G32680.1	protein_coding	AtRLP23, RLP23	receptor like protein 23	443	404	361	899	1030	534	289	418	331	996	1370	706	685.05	346	1024	2.9	1.536	2.14537e-22	1.26832e-19	0.0153	0.0125
AT3G18250.1	protein_coding	-	-	248	309	259	629	458	532	162	319	238	697	609	704	454.79	240	670	2.896	1.534	5.27546e-15	1.06969e-12	0.0236	0.0131
AT3G23120.1	protein_coding	AtRLP38, RLP38	receptor like protein 38	338	320	305	701	739	486	221	331	280	777	983	643	538.94	277	801	2.892	1.532	4.30553e-24	3.06675e-21	0.0136	0.0128
AT4G23810.1	protein_coding	ATWRKY53, WRKY53		225	208	229	487	435	383	147	215	210	540	579	507	366.12	191	542	2.881	1.526	9.79438e-22	5.33487e-19	0.0144	0.0136
AT5G64905.1	protein_coding	PROPEP3	elicitor peptide 3 precursor	9	5	16	17	20	20	6	5	15	19	27	26	16.27	9	24	2.875	1.524	0.000571015	0.00990152	0.0671	0.0783
ATCG01050.1	protein_coding	NDHD		35362	24328	27420	63227	43318	64644	23084	25145	25147	70057	57611	85526	47761.7	24459	71065	2.871	1.521	4.96641e-15	1.02194e-12	0.0259	0.0261
AT1G33610.1	protein_coding	-	-	10	7	16	25	23	16	7	7	15	28	31	21	17.98	10	27	2.866	1.519	0.000633894	0.010698	0.0751	0.0714
AT4G11655.2	protein_coding	CASPL4A4	CASP-like protein 4A4	21	16	18	28	36	45	14	17	17	31	48	60	30.87	16	46	2.866	1.519	2.905e-06	0.000115617	0.0367	0.046
AT3G53150.1	protein_coding	UGT73D1	UDP-glucosyl transferase 73D1	11	13	21	35	31	22	7	13	19	39	41	29	24.83	13	36	2.861	1.516	0.00018175	0.0038927	0.0679	0.0546
AT3G60966.1	protein_coding	-	-	162	250	252	469	353	464	106	258	231	520	469	614	366.38	198	534	2.858	1.515	1.00417e-11	1.21282e-09	0.0303	0.0136
AT4G03450.1	protein_coding	-	-	113	122	107	247	267	163	74	126	98	274	355	216	190.4	99	282	2.853	1.513	5.12725e-16	1.22784e-13	0.018	0.0159
AT3G56220.1	protein_coding	-	-	14	4	13	27	15	16	9	4	12	30	20	21	16.04	8	24	2.85	1.511	0.000490959	0.00873693	0.0616	0.0774
ATCG00400.1	tRNA	TRNL.1	tRNA-Leu	1704	1622	1726	4055	2701	3198	1112	1676	1583	4493	3592	4231	2781.34	1457	4105	2.849	1.51	4.15515e-18	1.32674e-15	0.0202	0.0136
AT1G69050.1	protein_coding	-	-	8	7	8	23	10	13	5	7	7	25	13	17	12.63	6	18	2.846	1.509	0.00173937	0.0231518	0.0742	0.0957
AT1G03980.2	protein_coding	PCS2, ATPCS2	phytochelatin synthase 2	6	8	10	15	17	15	4	8	9	17	23	20	13.41	7	20	2.838	1.505	0.000854769	0.0134378	0.0598	0.093
AT1G20350.1	protein_coding	ATTIM17-1, TIM17-1	translocase inner membrane subunit 17-1	39	39	42	88	76	69	25	40	39	98	101	91	65.69	35	97	2.835	1.504	1.35942e-09	1.18011e-07	0.0258	0.0265
AT3G01830.1	protein_coding	-	-	130	182	179	394	263	299	85	188	164	437	350	396	269.84	146	394	2.832	1.502	1.97234e-10	2.04439e-08	0.0333	0.0144
ATCG00440.1	protein_coding	NDHC		4891	3045	2995	7842	5921	6908	3193	3147	2747	8689	7875	9139	5798.35	3029	8568	2.829	1.5	1.79767e-23	1.21798e-20	0.0154	0.0159
AT4G21840.1	protein_coding	MSRB8, ATMSRB8	methionine sulfoxide reductase B8	90	79	110	207	174	156	59	82	101	229	231	206	151.41	81	222	2.825	1.498	5.45642e-13	8.23771e-11	0.0223	0.0173
AT5G47850.1	protein_coding	CCR4	CRINKLY4 related 4	14	16	23	42	39	23	9	17	21	47	52	30	29.27	16	43	2.825	1.498	9.97504e-05	0.00236431	0.0634	0.0477
AT5G05340.1	protein_coding	PRX52	peroxidase 52	292	210	184	488	385	427	191	217	169	541	512	565	365.68	192	539	2.817	1.494	1.06852e-22	6.5961e-20	0.013	0.0136
AT5G50790.1	protein_coding	SWEET10, AtSWEET10		160	230	154	456	259	338	104	238	141	505	344	447	296.72	161	432	2.814	1.493	8.84811e-09	6.43434e-07	0.0408	0.0141
AT5G64120.1	protein_coding	AtPRX71, PRX71	peroxidase 71	314	452	334	793	602	680	205	467	306	879	801	900	592.9	326	860	2.781	1.476	9.36444e-13	1.33403e-10	0.0269	0.0127
ATCG00430.1	protein_coding	PSBG	photosystem II reaction center protein G	10010	6884	6346	16297	12335	14871	6535	7115	5820	18057	16405	19675	12267.8	6490	18046	2.782	1.476	2.2883e-18	7.47844e-16	0.0195	0.0191
AT1G35230.1	protein_coding	AGP5	arabinogalactan protein 5	94	111	115	243	202	165	61	115	105	269	269	218	172.96	94	252	2.766	1.468	1.46191e-11	1.73549e-09	0.0259	0.0164
AT3G46080.1	protein_coding	-	-	10	19	14	28	48	12	7	20	13	31	64	16	24.96	13	37	2.764	1.467	0.000307463	0.00598529	0.0644	0.055
AT2G04190.1	protein_coding	-	-	19	8	11	24	31	16	12	8	10	27	41	21	19.96	10	30	2.755	1.462	0.000296579	0.00583062	0.0578	0.065
AT1G55230.1	protein_coding	-	-	46	68	55	115	120	84	30	70	50	127	160	111	91.48	50	133	2.751	1.46	1.32143e-09	1.15072e-07	0.0277	0.0219
ATCG00780.1	protein_coding	RPL14	ribosomal protein L14	3974	1775	1815	4931	4248	4040	2594	1835	1665	5464	5650	5345	3758.62	2031	5486	2.75	1.459	2.93702e-20	1.31593e-17	0.0169	0.0144
ATCG00160.1	protein_coding	RPS2	ribosomal protein S2	1544	524	590	1695	1569	1192	1008	542	541	1878	2087	1577	1272.08	697	1847	2.746	1.458	6.67622e-16	1.58512e-13	0.0212	0.0124
ATCG00660.1	protein_coding	RPL20	ribosomal protein L20	6855	3923	4120	9864	7850	9394	4475	4055	3778	10930	10440	12429	7684.39	4103	11266	2.744	1.457	1.41519e-20	6.66313e-18	0.0168	0.017
AT1G65483.1	protein_coding	-	-	48	54	37	105	70	85	31	56	34	116	93	112	73.83	40	107	2.735	1.452	5.48092e-08	3.40614e-06	0.0341	0.0246
AT1G17600.1	protein_coding	-	-	42	40	35	53	113	62	27	41	32	59	150	82	65.32	33	97	2.734	1.451	9.61011e-09	6.88039e-07	0.0265	0.0267
ATCG00130.1	protein_coding	ATPF		35180	21412	23081	57188	38988	50609	22966	22131	21168	63365	51852	66957	41406.6	22088	60725	2.735	1.451	4.86639e-15	1.00883e-12	0.0237	0.0253
AT5G20230.1	protein_coding	ATBCB, BCB, SAG14	blue-copper-binding protein, BLUE COPPER BINDING PROTEIN, SENESCENCE ASSOCIATED GENE 14	680	955	873	1900	1376	1404	444	987	801	2105	1830	1858	1337.4	744	1931	2.723	1.445	1.21977e-11	1.46051e-09	0.0297	0.0124
ATCG00170.1	protein_coding	RPOC2		7100	1766	2427	6567	6555	4511	4635	1825	2226	7276	8718	5968	5108.07	2895	7321	2.715	1.441	2.36085e-09	1.94605e-07	0.0384	0.0154
AT5G50915.4	protein_coding	-	-	6	5	9	14	11	12	4	5	8	16	15	16	10.56	6	16	2.711	1.439	0.00380586	0.0411214	0.0712	0.1123
ATCG00760.1	protein_coding	RPL36	ribosomal protein L36	1014	542	489	1270	1205	1109	662	560	448	1407	1603	1467	1024.6	557	1492	2.702	1.434	2.17409e-22	1.26832e-19	0.0139	0.0123
ATCG00740.1	protein_coding	RPOA	RNA polymerase subunit alpha	4683	2023	2250	5168	4699	5486	3057	2091	2063	5726	6249	7258	4407.56	2404	6411	2.701	1.433	1.34697e-15	2.9823e-13	0.0217	0.0149
AT2G44290.1	protein_coding	-	-	251	301	229	550	494	398	164	311	210	609	657	527	412.99	228	598	2.698	1.432	4.97725e-17	1.36894e-14	0.0174	0.0133
AT1G76480.2	protein_coding	-	-	29	32	42	56	47	90	19	33	39	62	63	119	55.69	30	81	2.696	1.431	9.04487e-08	5.3459e-06	0.0292	0.0296
AT2G12905.1	protein_coding	-	-	4022	2314	2241	6138	4661	4524	2626	2392	2055	6801	6199	5985	4342.97	2358	6328	2.693	1.429	6.81555e-25	5.25914e-22	0.0131	0.0148
ATCG00560.1	protein_coding	PSBL	photosystem II reaction center protein L	15477	10951	11855	28868	18931	22765	10103	11319	10872	31986	25177	30119	19929.5	10765	29094	2.692	1.429	3.88481e-16	9.55009e-14	0.0212	0.0215
ATCG00290.1	tRNA	TRNS.2	tRNA-Ser	1106	314	361	1164	937	720	722	325	331	1290	1246	953	811.02	459	1163	2.684	1.424	9.21005e-15	1.80173e-12	0.0215	0.0124
ATCG00150.1	protein_coding	ATPI		13763	8387	9049	22368	16545	17278	8985	8669	8299	24784	22004	22859	15933.3	8651	23216	2.682	1.423	5.65874e-19	2.06834e-16	0.0177	0.0204
ATCG00220.1	protein_coding	PSBM	photosystem II reaction center protein M	1890	1901	2827	4019	1857	8059	1234	1965	2593	4453	2470	10662	3896.07	1931	5862	2.677	1.421	1.07684e-07	6.28433e-06	0.0462	0.0145
AT5G28237.2	protein_coding	-	-	48	27	17	61	52	47	31	28	16	68	69	62	45.63	25	66	2.676	1.42	6.19187e-07	2.93522e-05	0.0323	0.0335
AT5G01900.1	protein_coding	WRKY62, ATWRKY62	WRKY DNA-binding protein 62, ARABIDOPSIS THALIANA WRKY DNA-BINDING PROTEIN 62	23	20	15	48	28	30	15	21	14	53	37	40	29.93	17	43	2.665	1.414	2.61508e-05	0.00076791	0.042	0.0463
ATCG01000.1	protein_coding	YCF1.1		751	451	553	1030	959	1139	490	466	507	1141	1275	1507	897.86	488	1308	2.662	1.413	1.54052e-26	1.47565e-23	0.0109	0.0124
ATCG00570.1	protein_coding	PSBF	photosystem II reaction center protein F	15371	10118	10433	26899	18944	18682	10034	10458	9568	29805	25195	24717	18296	10020	26572	2.644	1.403	3.07758e-17	8.63556e-15	0.0191	0.0211
ATCG00580.1	protein_coding	PSBE	photosystem II reaction center protein E	22215	14727	15449	39551	27268	27520	14502	15222	14168	43823	36265	36410	26731.7	14631	38833	2.645	1.403	7.54073e-16	1.76029e-13	0.0209	0.023
ATCG01060.1	protein_coding	PSAC		18203	12198	12366	30604	21516	24479	11883	12608	11341	33910	28615	32386	21790.5	11944	31637	2.645	1.403	2.82207e-16	7.19213e-14	0.0203	0.0219
ATCG00470.1	protein_coding	ATPE	ATP synthase epsilon chain	12928	7520	7636	19589	15540	14208	8439	7773	7003	21705	20667	18798	14064.2	7738	20390	2.638	1.399	4.71307e-19	1.75329e-16	0.017	0.0198
ATCG00840.1	protein_coding	RPL23.1, RPL23	ribosomal protein L23.1, RIBOSOMAL PROTEIN L23	940	527	495	1244	1142	1011	614	545	454	1378	1519	1338	974.51	538	1412	2.636	1.399	3.90269e-25	3.18861e-22	0.0115	0.0123
AT4G18350.1	protein_coding	ATNCED2, NCED2	NINE-CIS-EPOXYCAROTENOID DIOXYGENASE 2, nine-cis-epoxycarotenoid dioxygenase 2	249	184	77	426	213	233	163	190	71	472	283	308	247.82	141	354	2.635	1.398	4.63048e-09	3.60309e-07	0.0337	0.0147
AT1G04600.1	protein_coding	XIA, ATXIA	myosin XI A	20	22	17	43	38	26	13	23	16	48	51	34	30.66	17	44	2.628	1.394	2.05741e-05	0.000634326	0.0389	0.0457
AT1G31580.1	protein_coding	ECS1, CXC750		1250	1700	1912	3094	2598	2908	816	1757	1753	3428	3455	3847	2509.57	1442	3577	2.62	1.39	7.22128e-13	1.06702e-10	0.025	0.0133
AT3G07600.1	protein_coding	-	-	99	102	126	208	212	165	65	105	116	230	282	218	169.39	95	243	2.616	1.388	4.45e-12	5.7496e-10	0.0213	0.0166
ATCG00530.1	protein_coding	YCF10		9489	5133	6840	12821	9563	15462	6194	5305	6273	14206	12718	20457	10859	5924	15794	2.617	1.388	6.24148e-17	1.68332e-14	0.0189	0.0185
ATCG00550.1	protein_coding	PSBJ	photosystem II reaction center protein J	17083	13369	14139	32860	22267	25066	11152	13818	12967	36410	29614	33163	22853.9	12646	33062	2.616	1.387	2.65277e-14	4.91276e-12	0.0228	0.0222
AT1G10340.2	protein_coding	-	-	176	194	152	324	355	253	115	201	139	359	472	335	270.11	152	389	2.605	1.381	3.11257e-18	1.00539e-15	0.0134	0.0144
AT4G39830.2	protein_coding	-	-	44	47	50	91	90	71	29	49	46	101	120	94	72.94	41	105	2.605	1.381	9.59663e-09	6.88039e-07	0.0253	0.0248
ATCG01070.1	protein_coding	NDHE		5928	3853	4726	9552	6551	9607	3870	3982	4334	10584	8713	12710	7365.52	4062	10669	2.599	1.378	4.73369e-19	1.75329e-16	0.0164	0.0168
ATCG00280.1	protein_coding	PSBC	photosystem II reaction center protein C	175617	69779	88911	214549	180069	155642	114643	72123	81540	237724	239483	205918	158572	89435	227708	2.59	1.373	4.10058e-10	3.90102e-08	0.0333	0.0332
ATCG00540.1	protein_coding	PETA	photosynthetic electron transfer A	24420	13280	13171	32457	27712	26147	15941	13726	12079	35963	36856	34593	24859.8	13915	35804	2.589	1.372	2.03148e-15	4.37461e-13	0.0207	0.0226
AT3G60540.2	protein_coding	-	-	44	74	52	116	102	81	29	76	48	129	136	107	87.37	51	124	2.584	1.37	2.58913e-07	1.36736e-05	0.0359	0.0224
AT3G59765.1	ncRNA		other RNA	5	11	10	14	15	17	3	11	9	16	20	22	13.63	8	19	2.582	1.369	0.00297708	0.0346979	0.068	0.0918
AT5G03350.1	protein_coding	-	-	47	41	37	80	72	67	31	42	34	89	96	89	63.34	36	91	2.574	1.364	8.37008e-09	6.10269e-07	0.022	0.027
AT3G48840.1	protein_coding	-	-	8	8	10	18	14	14	5	8	9	20	19	19	13.29	7	19	2.572	1.363	0.00235058	0.0291243	0.0603	0.0922
AT1G67980.1	protein_coding	CCOAMT	caffeoyl-CoA 3-O-methyltransferase	16	42	30	45	49	56	10	43	28	50	65	74	45.08	27	63	2.567	1.36	3.78557e-05	0.00106221	0.0502	0.0344
AT4G30430.1	protein_coding	TET9	tetraspanin9	11	13	12	30	21	14	7	13	11	33	28	19	18.55	10	27	2.566	1.36	0.00127883	0.0182552	0.0652	0.0691
ATCG00010.1	tRNA	TRNH	A chloroplast gene encoding a histidine-accepting tRNA.	288	146	158	396	310	293	188	151	145	439	412	388	287.09	161	413	2.562	1.358	1.45222e-19	5.76303e-17	0.0118	0.0142
ATCG00770.1	protein_coding	RPS8	ribosomal protein S8	3093	1272	1414	3224	3132	2948	2019	1315	1297	3572	4165	3900	2711.43	1544	3879	2.563	1.358	5.00781e-15	1.02288e-12	0.0202	0.0135
ATCG01010.1	protein_coding	NDHF		2527	1818	2152	3832	2620	5204	1650	1879	1974	4246	3484	6885	3352.96	1834	4872	2.555	1.354	6.99929e-15	1.3988e-12	0.0204	0.014
AT1G09877.1	snoRNA			13	4	7	16	11	13	8	4	6	18	15	17	11.43	6	17	2.554	1.353	0.00380864	0.0411354	0.0605	0.1026
AT1G66465.1	protein_coding	-	-	52	61	60	125	90	89	34	63	55	139	120	118	87.99	51	126	2.55	1.35	7.31114e-08	4.42475e-06	0.0311	0.0222
AT3G13433.1	protein_coding	-	-	17	20	22	51	17	41	11	21	20	57	23	54	30.88	17	45	2.549	1.35	0.000812169	0.0129143	0.0738	0.0453
ATCG00750.1	protein_coding	RPS11	ribosomal protein S11	3256	1347	1329	3367	3266	2789	2126	1392	1219	3731	4344	3690	2750.14	1579	3922	2.549	1.35	8.63803e-15	1.70181e-12	0.0203	0.0135
ATCG01300.1	protein_coding	RPL23.2	ribosomal protein L23	926	554	509	1245	1126	984	604	573	467	1379	1498	1302	970.46	548	1393	2.549	1.35	3.61572e-25	3.04367e-22	0.0107	0.0123
AT4G17660.1	protein_coding	-	-	58	83	107	151	137	136	38	86	98	167	182	180	125.2	74	176	2.546	1.349	3.19023e-08	2.08031e-06	0.0321	0.0187
AT5G55450.1	protein_coding	AtLTP4.4		218	189	212	425	341	313	142	195	194	471	454	414	311.77	177	446	2.544	1.347	3.62688e-16	8.99563e-14	0.0155	0.014
AT1G74590.1	protein_coding	GSTU10, ATGSTU10	GLUTATHIONE S-TRANSFERASE TAU 10, glutathione S-transferase TAU 10	328	288	336	600	519	529	214	298	308	665	690	700	479.15	273	685	2.54	1.345	7.71297e-20	3.19789e-17	0.0128	0.013
ATCG00730.1	protein_coding	PETD	photosynthetic electron transfer D	77497	49211	54606	129099	89094	93837	50590	50864	50079	143044	118491	124149	89536.3	50511	128561	2.537	1.343	4.69082e-12	6.0327e-10	0.0262	0.0297
AT1G27890.1	protein_coding	-	-	9	5	13	21	12	13	6	5	12	23	16	17	13.23	8	19	2.535	1.342	0.00478748	0.0487148	0.0766	0.0914
AT1G33960.2	protein_coding	AIG1	AVRRPT2-INDUCED GENE 1	276	261	237	464	537	352	180	270	217	514	714	466	393.55	222	565	2.535	1.342	1.3455e-19	5.49655e-17	0.0125	0.0134
AT5G42830.1	protein_coding	-	-	91	135	119	223	208	165	59	140	109	247	277	218	175.02	103	247	2.53	1.339	1.44509e-09	1.24282e-07	0.0274	0.0164
AT5G39160.1	protein_coding	-	-	230	285	277	511	331	546	150	295	254	566	440	722	404.59	233	576	2.527	1.338	4.08628e-10	3.90079e-08	0.0283	0.0133
ATCG01110.1	protein_coding	NDHH	NAD(P)H dehydrogenase subunit H	4982	2187	2107	5229	5058	4443	3252	2260	1932	5794	6727	5878	4307.34	2481	6133	2.527	1.337	1.24465e-14	2.41784e-12	0.0204	0.0148
AT5G09290.1	protein_coding	-	-	125	124	126	229	222	196	82	128	116	254	295	259	188.94	109	269	2.524	1.336	2.30267e-14	4.32202e-12	0.0156	0.016
ATCG00650.1	protein_coding	RPS18	ribosomal protein S18	1372	1076	1386	2585	1374	2902	896	1112	1271	2864	1827	3839	1968.32	1093	2843	2.521	1.334	1.75392e-13	2.86602e-11	0.0218	0.0129
AT5G26170.1	protein_coding	WRKY50, ATWRKY50	WRKY DNA-binding protein 50, ARABIDOPSIS THALIANA WRKY DNA-BINDING PROTEIN 50	68	87	113	156	168	133	44	90	104	173	223	176	135.03	79	191	2.519	1.333	4.9319e-09	3.80565e-07	0.0277	0.0181
AT5G22530.1	protein_coding	-	-	26	60	48	78	70	76	17	62	44	86	93	101	67.18	41	93	2.517	1.332	1.65707e-05	0.000526078	0.0489	0.0262
AT1G13310.1	protein_coding	-	-	32	31	35	80	45	47	21	32	32	89	60	62	49.28	28	70	2.513	1.329	1.18135e-05	0.000393487	0.0415	0.0318
AT4G23220.1	protein_coding	CRK14	cysteine-rich RLK (RECEPTOR-like protein kinase) 14	289	247	294	506	516	404	189	255	270	561	686	535	415.83	238	594	2.513	1.329	1.31351e-17	3.88172e-15	0.0142	0.0133
AT3G09400.2	protein_coding	PLL3	pol-like 3	14	10	10	22	16	20	9	10	9	24	21	26	16.79	9	24	2.51	1.328	0.000781652	0.0125392	0.046	0.075
AT1G13400.1	protein_coding	NUB, JGL	JAGGED-LIKE, NUBBIN	61	37	43	90	63	85	40	38	39	100	84	112	68.91	39	99	2.507	1.326	9.32473e-09	6.74562e-07	0.0215	0.0256
AT4G14390.2	protein_coding	-	-	117	103	136	230	181	196	76	106	125	255	241	259	177.07	102	252	2.504	1.324	1.74297e-12	2.38513e-10	0.0184	0.0163
AT3G02840.1	protein_coding	-	-	20	25	17	26	58	27	13	26	16	29	77	36	32.69	18	47	2.501	1.323	2.74491e-05	0.000798439	0.034	0.044
AT1G33720.3	protein_coding	CYP76C6	"cytochrome P450, family 76, subfamily C, polypeptide 6"	123	100	103	195	203	158	80	103	94	216	270	209	162.2	92	232	2.499	1.322	3.99532e-14	7.20688e-12	0.0146	0.0168
AT4G37390.1	protein_coding	BRU6, YDK1, GH3-2, GH3.2, AUR3	YADOKARI 1, AUXIN UPREGULATED 3	458	734	482	926	825	1045	299	759	442	1026	1097	1383	834.25	500	1169	2.497	1.32	1.8084e-10	1.90287e-08	0.0277	0.0124
AT3G55970.2	protein_coding	ATJRG21, JRG21	jasmonate-regulated gene 21	49	32	44	111	54	53	32	33	40	123	72	70	61.72	35	88	2.487	1.315	2.13404e-06	8.8348e-05	0.0351	0.0272
AT5G22545.1	protein_coding	-	-	31	49	59	75	75	83	20	51	54	83	100	110	69.61	42	98	2.488	1.315	6.05673e-07	2.89089e-05	0.0324	0.0256
ATCG00360.1	protein_coding	YCF3		13115	8920	9212	21321	15577	15788	8562	9220	8448	23624	20717	20888	15243	8743	21743	2.484	1.313	5.06924e-16	1.22451e-13	0.0182	0.0202
ATCG01080.1	protein_coding	NDHG		8192	5065	5837	11563	8378	12157	5348	5235	5353	12812	11142	16084	9329.08	5312	13346	2.484	1.312	3.51541e-16	8.7977e-14	0.0179	0.0178
AT3G00970.1	lncRNA			7	12	8	17	16	13	5	12	7	19	21	17	13.6	8	19	2.478	1.309	0.0041139	0.0435698	0.0668	0.091
ATCG01240.1	protein_coding	RPS7.2	ribosomal protein S7	833	540	469	1110	1026	899	544	558	430	1230	1365	1189	885.98	511	1261	2.478	1.309	4.15387e-24	3.03659e-21	0.0104	0.0124
AT3G47342.1	snoRNA		snoRNA	23	13	28	42	35	29	15	13	26	47	47	38	30.93	18	44	2.474	1.307	0.000154211	0.00339716	0.0482	0.045
ATCG00790.1	protein_coding	RPL16	ribosomal protein L16	3985	1883	1950	4593	4087	3756	2601	1946	1788	5089	5436	4969	3638.33	2112	5165	2.475	1.307	1.08373e-17	3.23709e-15	0.0158	0.0143
AT1G14540.1	protein_coding	PER4	peroxidase 4	29	27	4	55	29	13	19	28	4	61	39	17	27.87	17	39	2.469	1.304	0.000744778	0.0121161	0.0584	0.0483
AT1G05880.3	protein_coding	ARI12, ATARI12	ARIADNE 12, ARABIDOPSIS ARIADNE 12	9	22	26	39	38	19	6	23	24	43	51	25	28.56	18	40	2.468	1.303	0.00423654	0.0444546	0.0997	0.0486
AT5G39670.1	protein_coding	-	-	747	1095	1319	1891	1572	1754	488	1132	1210	2095	2091	2321	1555.94	943	2169	2.467	1.303	4.00596e-10	3.8373e-08	0.0287	0.0126
AT5G41280.1	protein_coding	-	-	25	24	27	49	48	32	16	25	25	54	64	42	37.73	22	53	2.457	1.297	2.41924e-05	0.00071876	0.0372	0.0388
AT5G20940.1	protein_coding	-	-	32	25	32	46	51	51	21	26	29	51	68	67	43.72	25	62	2.44	1.287	1.8876e-06	7.93294e-05	0.0263	0.0348
AT5G24206.1	ncRNA		other RNA	14	18	37	42	32	36	9	19	34	47	43	48	33.07	21	46	2.44	1.287	0.000623678	0.0105641	0.0642	0.043
AT5G39190.1	protein_coding	GER2, ATGER2, GLP2A	germin-like protein 2, A. THALIANA GERMIN LIKE PROTEIN 2, GERMIN-LIKE PROTEIN 2A	250	325	376	611	437	533	163	336	345	677	581	705	467.89	281	654	2.439	1.286	7.46709e-10	6.86849e-08	0.0274	0.0131
AT1G35710.1	protein_coding	-	-	1471	933	880	1773	2307	1357	960	964	807	1965	3068	1795	1593.29	910	2276	2.436	1.285	1.63924e-17	4.74338e-15	0.0151	0.0126
ATCG01220.1	tRNA	TRNV.3	tRNA-Val	14	9	8	18	18	15	9	9	7	20	24	20	14.92	8	21	2.433	1.282	0.00181227	0.0239433	0.0476	0.0829
AT1G76470.1	protein_coding	-	-	91	114	97	162	144	197	59	118	89	179	192	261	149.64	89	211	2.429	1.281	1.40521e-09	1.21606e-07	0.0237	0.0174
AT5G64810.1	protein_coding	ATWRKY51, WRKY51	WRKY DNA-binding protein 51, ARABIDOPSIS THALIANA WRKY DNA-BINDING PROTEIN 51	178	187	222	377	271	328	116	193	204	418	360	434	287.53	171	404	2.426	1.279	1.04673e-11	1.25875e-09	0.0207	0.0142
ATCG00480.1	protein_coding	PB, ATPB	ATP synthase subunit beta	41612	22947	22285	52263	44402	41358	27164	23718	20438	57908	59053	54718	40499.8	23773	57226	2.422	1.276	1.72549e-12	2.37289e-10	0.0228	0.0252
AT2G32190.2	protein_coding	-	-	104	96	99	180	150	161	68	99	91	199	199	213	144.98	86	204	2.406	1.267	1.32812e-11	1.58343e-09	0.0171	0.0175
AT1G68765.1	protein_coding	IDA	INFLORESCENCE DEFICIENT IN ABSCISSION	34	40	47	94	54	55	22	41	43	104	72	73	59.23	35	83	2.398	1.262	5.62841e-05	0.00147131	0.0489	0.0281
AT5G52720.2	protein_coding	-	-	13	40	42	54	49	44	8	41	39	60	65	58	45.26	29	61	2.392	1.259	0.00119439	0.0172718	0.0772	0.0341
ATCG00905.1	protein_coding	RPS12, RPS12C	RIBOSOMAL PROTEIN S12, ribosomal protein S12C	2018	1330	1167	2681	2265	2236	1317	1375	1070	2971	3012	2958	2117.25	1254	2980	2.389	1.256	2.08013e-20	9.4728e-18	0.0123	0.013
AT1G30190.1	protein_coding	-	-	28	13	11	47	21	16	18	13	10	52	28	21	23.83	14	34	2.385	1.254	0.000371444	0.00698601	0.04	0.0545
AT4G09780.1	protein_coding	-	-	6	15	14	17	24	16	4	16	13	19	32	21	17.36	11	24	2.382	1.252	0.00338085	0.0378086	0.0641	0.0744
AT5G52730.1	protein_coding	-	-	21	20	21	28	41	33	14	21	19	31	55	44	30.48	18	43	2.377	1.249	6.42784e-05	0.00163665	0.0328	0.0461
AT4G18980.1	protein_coding	AtS40-3	AtS40-3	267	340	436	594	431	662	174	351	400	658	573	876	505.47	308	702	2.375	1.248	2.16488e-10	2.22734e-08	0.0243	0.0129
AT1G75040.1	protein_coding	PR-5, PR5	pathogenesis-related gene 5	312	208	226	458	408	331	204	215	207	507	543	438	352.32	209	496	2.371	1.245	4.6816e-18	1.47784e-15	0.0114	0.0137
ATCG00900.1	protein_coding	RPS7, RPS7.1	CHLOROPLAST RIBOSOMAL PROTEIN S7	835	564	498	1076	983	936	545	583	457	1192	1307	1238	887.11	528	1246	2.366	1.242	1.73e-21	9.06751e-19	0.0107	0.0124
ATCG00330.1	protein_coding	RPS14	chloroplast ribosomal protein S14	61097	20739	24224	61764	50363	41288	39884	21436	22216	68436	66980	54625	45596.2	27845	63347	2.363	1.241	2.73169e-09	2.22533e-07	0.03	0.0259
ATCG01230.1	protein_coding	RPS12B, RPS12	RIBOSOMAL PROTEIN S12, ribosomal protein S12B	2085	1303	1184	2598	2338	2215	1361	1347	1086	2879	3109	2931	2118.71	1265	2973	2.36	1.239	5.65102e-20	2.45281e-17	0.0123	0.013
AT1G30660.3	protein_coding	-	-	16	7	13	19	10	29	10	7	12	21	13	38	17.05	10	24	2.349	1.232	0.0025941	0.031413	0.0521	0.0738
AT2G39518.1	protein_coding	CASPL4D2	CASP-like protein 4D2	36	61	42	94	68	61	24	63	39	104	90	81	66.73	42	92	2.347	1.231	5.02267e-05	0.00134158	0.047	0.0261
ATCG00520.1	protein_coding	YCF4		12884	6818	7369	15221	12953	13455	8411	7047	6758	16865	17227	17801	12351.5	7405	17298	2.346	1.23	2.49167e-14	4.64538e-12	0.0181	0.0191
AT1G66600.1	protein_coding	WRKY63, ABO3, ATWRKY63	ABA overly sensitive mutant 3, WRKY DNA-binding protein 63	67	145	107	168	175	152	44	150	98	186	233	201	151.95	97	207	2.343	1.228	7.59172e-07	3.53843e-05	0.035	0.0173
AT1G36622.1	protein_coding	-	-	54	66	38	113	69	71	35	68	35	125	92	94	74.87	46	104	2.342	1.227	1.29512e-05	0.000424257	0.0401	0.0243
ATCG00180.1	protein_coding	RPOC1		6738	2810	2866	6767	6042	5365	4399	2904	2628	7498	8036	7098	5427.17	3310	7544	2.335	1.224	5.2925e-13	8.03391e-11	0.0197	0.0156
AT2G41850.1	protein_coding	PGAZAT, ADPG2	ARABIDOPSIS DEHISCENCE ZONE POLYGALACTURONASE 2, polygalacturonase abscission zone A. thaliana	43	144	8	85	128	28	28	149	7	94	170	37	80.95	61	100	2.332	1.222	0.000333719	0.00639777	0.0576	0.0233
AT2G38250.1	protein_coding	-	-	20	14	21	38	29	21	13	14	19	42	39	28	25.87	15	36	2.33	1.22	0.000703973	0.0116126	0.0495	0.0519
AT3G23250.1	protein_coding	MYB15, ATY19, ATMYB15	MYB DOMAIN PROTEIN 15, myb domain protein 15	73	106	103	153	160	133	48	110	94	170	213	176	134.99	84	186	2.324	1.217	1.60905e-08	1.10913e-06	0.0242	0.0181
AT5G56510.1	protein_coding	APUM12, PUM12	pumilio 12	41	37	35	64	57	58	27	38	32	71	76	77	53.43	32	75	2.325	1.217	1.43645e-06	6.21543e-05	0.0247	0.0301
ATCG00190.1	protein_coding	RPOB	RNA polymerase subunit beta	5048	1716	2007	4665	4512	3284	3295	1774	1841	5169	6001	4345	3737.35	2303	5172	2.32	1.214	1.69932e-10	1.80173e-08	0.0245	0.0144
AT1G30900.1	protein_coding	BP80-3;3, VSR6, VSR3;3	VACUOLAR SORTING RECEPTOR 6, binding protein of 80 kDa 3;3, VACUOLAR SORTING RECEPTOR 3;3	333	276	280	514	491	402	217	285	257	570	653	532	418.97	253	585	2.319	1.213	1.78063e-17	5.09939e-15	0.0117	0.0133
AT1G59730.1	protein_coding	TH7, ATH7	thioredoxin H-type 7	116	107	138	207	173	189	76	111	127	229	230	250	170.4	105	236	2.317	1.212	5.78778e-11	6.43115e-09	0.0176	0.0165
AT1G02450.1	protein_coding	NIMIN1, NIMIN-1	NIM1-interacting 1	134	185	198	297	239	276	87	191	182	329	318	365	245.4	153	337	2.314	1.21	9.55358e-09	6.88039e-07	0.0263	0.0148
AT3G12220.1	protein_coding	scpl16	serine carboxypeptidase-like 16	112	122	100	173	183	170	73	126	92	192	243	225	158.48	97	220	2.31	1.208	1.87233e-11	2.19457e-09	0.0159	0.017
AT5G48543.1	protein_coding	LCR1	low-molecular-weight cysteine-rich 1	103	43	38	103	87	79	67	44	35	114	116	105	80.15	49	112	2.305	1.205	4.28123e-07	2.11616e-05	0.0261	0.0232
ATCG00820.1	protein_coding	RPS19	ribosomal protein S19	2168	1193	1393	2687	2041	2550	1415	1233	1278	2977	2714	3374	2165.21	1309	3022	2.303	1.204	5.77227e-19	2.08244e-16	0.0123	0.013
AT4G25000.1	protein_coding	ATAMY1, AMY1	alpha-amylase-like	444	352	450	686	599	662	290	364	413	760	797	876	583.16	356	811	2.302	1.203	6.98835e-19	2.48884e-16	0.011	0.0127
AT3G50470.1	protein_coding	MLA10, HR3	INTRACELLULAR MILDEW A 10, homolog of RPW8 3	165	254	213	367	319	299	108	263	195	407	424	396	298.68	189	409	2.3	1.201	9.57036e-09	6.88039e-07	0.0265	0.0141
AT4G20000.1	protein_coding	-	-	114	122	154	222	197	190	74	126	141	246	262	251	183.52	114	253	2.297	1.2	1.26203e-09	1.10245e-07	0.0213	0.0161
ATCG00065.1	protein_coding	RPS12, RPS12A	RIBOSOMAL PROTEIN S12, ribosomal protein S12A	3783	2222	2274	4740	3751	4098	2470	2297	2085	5252	4989	5422	3752.35	2284	5221	2.289	1.195	1.02461e-17	3.09377e-15	0.0133	0.0144
AT4G18170.1	protein_coding	ATWRKY28, WRKY28	WRKY DNA-binding protein 28	27	11	37	39	38	33	18	11	34	43	51	44	33.39	21	46	2.286	1.193	0.000977906	0.0148851	0.0585	0.0423
AT1G52770.1	protein_coding	-	-	19	21	6	18	36	17	12	22	6	20	48	22	21.65	13	30	2.274	1.185	0.00208314	0.0265447	0.0512	0.0611
AT5G52760.1	protein_coding	-	-	513	721	728	1006	1045	961	335	745	668	1115	1390	1271	920.61	583	1259	2.272	1.184	1.88173e-12	2.54988e-10	0.0184	0.0124
AT3G20340.1	protein_coding	-	-	457	437	467	832	700	584	298	452	428	922	931	773	633.96	393	875	2.258	1.175	3.0904e-13	4.86866e-11	0.0164	0.0126
AT1G32960.1	protein_coding	ATSBT3.3, SBT3.3		132	153	141	207	226	223	86	158	129	229	301	295	199.76	124	275	2.255	1.173	6.10947e-12	7.74954e-10	0.015	0.0157
AT2G25470.3	protein_coding	RLP21, AtRLP21	receptor like protein 21	15	19	26	33	32	27	10	20	24	37	43	36	28.02	18	39	2.255	1.173	0.000972141	0.0148461	0.0504	0.0491
AT2G34810.1	protein_coding	AtBBE16		1178	785	702	1558	1122	1353	769	811	644	1726	1492	1790	1205.46	741	1669	2.256	1.173	4.36425e-16	1.06346e-13	0.0137	0.0124
AT1G21240.1	protein_coding	WAK3	wall associated kinase 3	1202	1247	1095	1745	2102	1625	785	1289	1004	1933	2796	2150	1659.46	1026	2293	2.253	1.172	1.83662e-19	7.08606e-17	0.0112	0.0126
AT1G51670.2	protein_coding	HTT5	HEAT-INDUCED TAS1 TARGET 5	27	22	14	29	46	23	18	23	13	32	61	30	29.49	18	41	2.254	1.172	0.000288535	0.00570072	0.0361	0.047
AT1G28480.1	protein_coding	GRXC9, roxy19, GRX480		24	29	40	64	47	34	16	30	37	71	63	45	43.45	28	60	2.252	1.171	0.000883573	0.0137429	0.0604	0.0348
AT3G44300.1	protein_coding	AtNIT2, NIT2	nitrilase 2	4411	4900	5278	7528	7059	7725	2880	5065	4840	8341	9388	10220	6789.05	4262	9316	2.246	1.167	1.14494e-12	1.62272e-10	0.0186	0.0165
ATCG00720.1	protein_coding	PETB	photosynthetic electron transfer B	104592	63582	68997	147770	103526	107235	68278	65718	63277	163732	137685	141875	106761	65758	147764	2.242	1.165	2.3311e-09	1.92725e-07	0.0267	0.0308
AT1G14260.2	protein_coding	-	-	18	20	21	42	25	25	12	21	19	47	33	33	27.42	17	38	2.239	1.163	0.00150639	0.0207982	0.055	0.0495
AT5G38900.1	protein_coding	-	-	348	570	411	656	604	729	227	589	377	727	803	964	614.65	398	831	2.233	1.159	7.34857e-09	5.41475e-07	0.0257	0.0126
ATCG00270.1	protein_coding	PSBD	photosystem II reaction center protein D	176167	57477	69944	159176	144517	108901	115003	59408	64146	176370	192201	144079	125201	79519	170883	2.234	1.159	1.17579e-06	5.16807e-05	0.0391	0.0318
ATCG00830.1	protein_coding	RPL2.1	ribosomal protein L2	3807	2164	2270	4668	3901	3632	2485	2237	2082	5172	5188	4805	3661.56	2268	5055	2.233	1.159	1.35646e-17	3.96644e-15	0.0126	0.0143
AT1G80840.1	protein_coding	ATWRKY40, WRKY40	WRKY DNA-binding protein 40	248	399	338	565	470	450	162	412	310	626	625	595	455.13	295	615	2.23	1.157	8.00375e-08	4.78142e-06	0.0294	0.0131
AT3G12910.1	protein_coding	-	-	24	15	34	48	32	29	16	16	31	53	43	38	32.74	21	45	2.229	1.157	0.00115304	0.016858	0.0553	0.0428
AT2G29480.1	protein_coding	ATGSTU2, GSTU2, GST20	GLUTATHIONE S-TRANSFERASE 20, glutathione S-transferase tau 2	103	96	74	134	148	131	67	99	68	148	197	173	125.49	78	173	2.227	1.155	7.66437e-10	7.02668e-08	0.0162	0.0186
AT3G21080.1	protein_coding	-	-	81	73	119	159	123	127	53	75	109	176	164	168	124.21	79	169	2.223	1.152	4.27238e-07	2.11555e-05	0.0275	0.0187
AT3G25020.1	protein_coding	AtRLP42, RBPG1, RLP42	response to Botrytis polygalacturonases 1, receptor like protein 42	426	201	208	476	444	297	278	208	191	527	590	393	364.58	226	503	2.222	1.152	2.54513e-13	4.06328e-11	0.0143	0.0136
AT4G25380.1	protein_coding	AtSAP10, SAP10	stress-associated protein 10, Arabidopsis thaliana stress-associated protein 10	16	10	23	23	29	21	10	10	21	25	39	28	22.29	14	31	2.218	1.149	0.00339754	0.0379494	0.0598	0.0591
AT4G23170.1	protein_coding	CRK9, EP1	CYSTEINE-RICH RLK (RECEPTOR-LIKE PROTEIN KINASE) 9	331	287	340	558	466	427	216	297	312	618	620	565	437.92	275	601	2.215	1.147	3.38035e-13	5.24596e-11	0.0149	0.0132
ATCG01310.1	protein_coding	RPL2.2	ribosomal protein L2	3874	2225	2272	4696	3906	3674	2529	2300	2084	5203	5195	4861	3695.2	2304	5086	2.213	1.146	3.29801e-17	9.16153e-15	0.0127	0.0143
AT1G53100.1	protein_coding	-	-	64	35	33	75	57	61	42	36	30	83	76	81	57.97	36	80	2.21	1.144	3.0289e-06	0.000119882	0.0239	0.0283
AT4G17950.1	protein_coding	AHL13	AT-hook motif nuclear localized protein 13	753	359	466	916	713	665	492	371	427	1015	948	880	688.83	430	948	2.21	1.144	2.26718e-17	6.42654e-15	0.0112	0.0125
AT3G61930.1	protein_coding	-	-	154	194	144	238	198	311	101	201	132	264	263	411	228.6	145	313	2.208	1.143	2.24737e-07	1.20289e-05	0.0288	0.0151
AT3G10930.1	protein_coding	-	-	47	68	94	99	84	128	31	70	86	110	112	169	96.32	62	130	2.207	1.142	2.87298e-06	0.000114667	0.0301	0.0212
AT3G25655.1	protein_coding	IDL1	inflorescence deficient in abscission (IDA)-like 1	16	18	24	44	21	25	10	19	22	49	28	33	26.8	17	37	2.207	1.142	0.00417993	0.0440494	0.0698	0.0503
AT1G80165.1	protein_coding	-	-	132	126	186	252	174	240	86	130	171	279	231	318	202.52	129	276	2.204	1.14	6.61631e-09	4.94071e-07	0.0216	0.0156
AT2G05380.3	protein_coding	GRP3S	glycine-rich protein 3 short isoform	119	161	139	221	264	154	78	166	127	245	351	204	195.22	124	267	2.199	1.137	8.99217e-09	6.52202e-07	0.0217	0.0158
AT5G40420.1	protein_coding	OLEO2, OLE2	OLEOSIN 2, oleosin 2	67	18	19	107	29	21	44	19	17	119	39	28	44.11	27	62	2.199	1.137	0.000102461	0.00241619	0.0311	0.0334
ATCG00120.1	protein_coding	ATPA	ATP synthase subunit alpha	76032	34453	34399	76082	65122	61368	49634	35611	31547	84300	86609	81191	61482.2	38931	84033	2.2	1.137	1.37484e-08	9.64434e-07	0.028	0.0276
AT2G23830.1	protein_coding	PVA31		15	17	21	18	37	27	10	18	19	20	49	36	25.25	16	35	2.197	1.136	0.00102553	0.0154996	0.0402	0.054
AT5G24200.2	protein_coding	-	-	684	654	526	898	1051	842	447	676	482	995	1398	1114	851.94	535	1169	2.198	1.136	1.62327e-19	6.3511e-17	0.0099	0.0124
AT3G47480.1	protein_coding	-	-	949	1567	1536	2180	1706	2084	620	1620	1409	2415	2269	2757	1848.23	1216	2480	2.196	1.135	3.23412e-07	1.66064e-05	0.0328	0.0128
AT2G27660.1	protein_coding	-	-	74	73	120	128	131	133	48	75	110	142	174	176	120.97	78	164	2.192	1.132	1.14328e-07	6.64416e-06	0.023	0.019
ATMG00370.1	protein_coding	ORF199		148	84	94	168	174	135	97	87	86	186	231	179	144.3	90	199	2.189	1.13	9.02554e-10	8.14028e-08	0.0165	0.0175
AT3G23010.1	protein_coding	RLP36, AtRLP36	receptor like protein 36	103	101	102	182	150	127	67	104	94	202	199	168	139.06	88	190	2.182	1.126	1.88704e-08	1.28095e-06	0.0204	0.0178
AT4G14365.1	protein_coding	XBAT34	XB3 ortholog 4 in Arabidopsis thaliana	1276	1507	1531	2150	2289	1977	833	1558	1404	2382	3044	2616	1972.8	1265	2681	2.182	1.126	1.06043e-13	1.80722e-11	0.0155	0.0129
AT2G47130.1	protein_coding	SDR3, AtSDR3	short-chain dehydrogenase/reductase 2	378	326	451	663	517	534	247	337	414	735	688	706	521	333	710	2.181	1.125	5.99025e-12	7.63317e-10	0.0166	0.0129
AT4G23230.1	protein_coding	CRK15	cysteine-rich RLK (RECEPTOR-like protein kinase) 15	172	143	163	226	257	227	112	148	149	250	342	300	217.02	136	297	2.179	1.124	1.28982e-12	1.8096e-10	0.0127	0.0153
AT5G54610.1	protein_coding	BDA1, ANK	ankyrin, bian da 2 (becoming big in Chinese)	397	409	489	641	595	686	259	423	448	710	791	908	589.92	377	803	2.18	1.124	1.54338e-14	2.93655e-12	0.0132	0.0127
AT3G60120.1	protein_coding	BGLU27	beta glucosidase 27	86	109	35	105	112	101	56	113	32	116	149	134	99.97	67	133	2.175	1.121	5.19229e-05	0.00138025	0.0418	0.0208
AT1G05575.1	protein_coding	-	-	84	120	160	210	147	175	55	124	147	233	196	232	164.22	109	220	2.17	1.118	1.5835e-05	0.000505609	0.0392	0.0167
AT1G61470.1	protein_coding	-	-	37	40	53	73	74	47	24	41	49	81	98	62	59.26	38	80	2.167	1.116	0.000119851	0.00275836	0.0404	0.0281
AT5G40000.1	protein_coding	-	-	23	17	19	29	25	33	15	18	17	32	33	44	26.51	17	36	2.166	1.115	0.000690573	0.0114146	0.0362	0.051
AT4G11890.2	protein_coding	ARCK1, CRK45	ABA- AND OSMOTIC-STRESS-INDUCIBLE RECEPTOR-LIKE CYTOSOLIC KINASE1, cysteine-rich receptor-like protein kinase 45	352	426	457	645	544	632	230	440	419	715	723	836	560.59	363	758	2.165	1.114	8.18449e-11	8.95106e-09	0.0185	0.0128
AT4G02520.1	protein_coding	ATGSTF2, GSTF2, ATPM24.1, GST2, ATPM24	glutathione S-transferase PHI 2	2033	3055	2897	3679	3784	4165	1327	3158	2657	4076	5033	5510	3626.83	2381	4873	2.164	1.113	2.9406e-10	2.94899e-08	0.0213	0.0143
ATCG00670.1	protein_coding	PCLPP, CLPP1	plastid-encoded CLP P, CASEINOLYTIC PROTEASE P 1	74608	56273	61189	116724	78217	90192	48704	58164	56117	129332	104025	119326	85944.7	54328	117561	2.161	1.112	3.75556e-08	2.42055e-06	0.0286	0.0295
AT5G24530.1	protein_coding	AtDMR6, DMR6	DOWNY MILDEW RESISTANT 6	1919	1755	1685	2866	2716	2333	1253	1814	1545	3176	3612	3087	2414.39	1537	3292	2.161	1.111	7.45741e-16	1.75559e-13	0.0129	0.0132
AT5G42530.1	protein_coding	-	-	1074	1740	2139	2189	2212	2668	701	1798	1962	2425	2942	3530	2226.4	1487	2966	2.16	1.111	5.56296e-09	4.21072e-07	0.0245	0.0131
AT2G04450.1	protein_coding	ATNUDX6, NUDX6, ATNUDT6, NUDT6	Arabidopsis thaliana nucleoside diphosphate linked to some moiety X 6, nudix hydrolase homolog 6, nucleoside diphosphates linked to some moiety X 6	211	250	186	360	332	261	138	258	171	399	442	345	292.08	189	395	2.154	1.107	1.29452e-10	1.38844e-08	0.0171	0.0142
AT4G23160.2	protein_coding	CRK8	cysteine-rich RLK (RECEPTOR-like protein kinase) 8	156	106	108	211	180	148	102	110	99	234	239	196	163.24	104	223	2.153	1.106	1.00808e-10	1.09818e-08	0.0141	0.0167
AT3G51660.1	protein_coding	-	-	490	463	443	880	623	575	320	479	406	975	829	761	628.18	402	855	2.149	1.103	3.73187e-11	4.28378e-09	0.0177	0.0126
ATCG01260.1	tRNA	TRNL.4	tRNA-Leu	39	51	42	64	57	73	25	53	39	71	76	97	60	39	81	2.148	1.103	3.24889e-05	0.000923757	0.0316	0.028
AT2G26692.1	lncRNA		other RNA	20	28	40	50	46	32	13	29	37	55	61	42	39.6	26	53	2.145	1.101	0.00201981	0.0259521	0.0607	0.0373
AT1G69920.1	protein_coding	GSTU12, ATGSTU12	glutathione S-transferase TAU 12, ARABIDOPSIS THALIANA GLUTATHIONE S-TRANSFERASE TAU 12	16	29	28	44	26	37	10	30	26	49	35	49	33.06	22	44	2.14	1.097	0.00416962	0.0440083	0.0689	0.0429
AT4G31230.1	protein_coding	-	-	13	15	12	18	23	18	8	16	11	20	31	24	18.22	12	25	2.137	1.096	0.00378723	0.0409838	0.0427	0.0704
AT1G80440.1	protein_coding	KFB20, KMD1	KISS ME DEADLY 1, Kelch repeat F-box 20	21	19	17	29	27	27	14	20	16	32	36	36	25.45	17	35	2.135	1.094	0.0010201	0.0154259	0.0369	0.0527
AT5G27060.2	protein_coding	AtRLP53, RLP53	receptor like protein 53	123	87	100	155	173	123	80	90	92	172	230	163	137.75	87	188	2.135	1.094	4.31179e-09	3.39312e-07	0.0167	0.0179
AT1G17180.1	protein_coding	GSTU25, ATGSTU25	glutathione S-transferase TAU 25	68	74	91	113	109	116	44	76	83	125	145	153	104.66	68	141	2.133	1.093	2.08347e-07	1.1282e-05	0.0209	0.0203
AT3G07520.1	protein_coding	GLR1.4, ATGLR1.4	glutamate receptor 1.4	305	185	196	379	341	263	199	191	180	420	454	348	298.58	190	407	2.131	1.092	2.07298e-13	3.36756e-11	0.012	0.0141
AT2G01818.1	protein_coding	-	-	40	32	61	68	59	62	26	33	56	75	78	82	58.5	38	78	2.13	1.091	4.79249e-05	0.00129253	0.0322	0.0283
AT5G39150.1	protein_coding	-	-	37	33	51	61	58	55	24	34	47	68	77	73	53.75	35	73	2.126	1.088	4.58827e-05	0.0012447	0.0304	0.03
AT5G42380.1	protein_coding	AtCML37, CML37	calmodulin like 37	34	53	57	68	104	44	22	55	52	75	138	58	66.85	43	90	2.125	1.087	0.000284921	0.00564136	0.0452	0.0262
AT4G37990.1	protein_coding	ELI3-2, ATCAD8, ELI3, CAD-B2	elicitor-activated gene 3-2, CINNAMYL-ALCOHOL DEHYDROGENASE B2, ARABIDOPSIS THALIANA CINNAMYL-ALCOHOL DEHYDROGENASE 8, ELICITOR-ACTIVATED GENE 3	740	812	652	1081	925	1186	483	839	598	1198	1230	1569	986.23	640	1332	2.122	1.086	7.23078e-11	7.97079e-09	0.0182	0.0123
AT5G52740.2	protein_coding	-	-	303	363	365	563	477	456	198	375	335	624	634	603	461.54	303	620	2.123	1.086	1.12603e-09	9.9302e-08	0.0198	0.0131
AT2G34600.1	protein_coding	TIFY5B, JAZ7	jasmonate-zim-domain protein 7	18	29	40	38	48	38	12	30	37	42	64	50	39.1	26	52	2.12	1.084	0.000784829	0.01257	0.0452	0.0379
AT2G09695.1	snoRNA			1515	1032	1973	2418	1677	2294	989	1067	1809	2679	2230	3035	1968.28	1288	2648	2.117	1.082	1.33661e-12	1.86581e-10	0.0157	0.0129
ATCG00640.1	protein_coding	RPL33	ribosomal protein L33	1245	962	910	1791	1294	1410	813	994	835	1984	1721	1865	1368.75	881	1857	2.116	1.081	1.49248e-14	2.85928e-12	0.0131	0.0124
AT2G30420.1	protein_coding	ETC2	ENHANCER OF TRY AND CPC 2	13	13	23	22	26	22	8	13	21	24	35	29	21.85	14	29	2.113	1.079	0.00427272	0.0447158	0.0517	0.0602
AT5G58840.2	protein_coding	-	-	207	167	195	277	268	271	135	173	179	307	356	359	251.41	162	341	2.111	1.078	1.2814e-12	1.80691e-10	0.012	0.0147
AT2G31880.1	protein_coding	EVR, SOBIR1	SUPPRESSOR OF BIR1 1, EVERSHED	4957	4642	4827	7147	7385	6256	3236	4798	4427	7919	9822	8277	6413.05	4154	8673	2.108	1.076	5.55756e-13	8.34505e-11	0.0155	0.0163
AT2G42360.1	protein_coding	-	-	49	54	57	98	61	74	32	56	52	109	81	98	71.28	47	96	2.108	1.076	5.53806e-05	0.00145408	0.0348	0.025
AT4G37010.2	protein_coding	CEN2	centrin 2	187	174	194	308	230	263	122	180	178	341	306	348	245.83	160	332	2.108	1.076	7.72486e-10	7.05885e-08	0.0171	0.0148
AT5G02220.1	protein_coding	SMR4	SIAMESE-RELATED 4	26	28	21	47	27	35	17	29	19	52	36	46	33.24	22	45	2.109	1.076	0.00143564	0.0200233	0.0481	0.0424
AT2G14610.1	protein_coding	PR1, ATPR1, AtCAPE9, PR 1	PATHOGENESIS-RELATED GENE 1, pathogenesis-related gene 1	379	1158	541	1109	640	954	247	1197	496	1229	851	1262	880.43	647	1114	2.106	1.074	0.00403754	0.0430057	0.0842	0.0124
AT5G39330.1	protein_coding	-	-	21	11	22	31	22	23	14	11	20	34	29	30	23.22	15	31	2.105	1.074	0.00261699	0.0316214	0.0445	0.0563
AT5G22520.1	protein_coding	-	-	27	61	58	72	60	71	18	63	53	80	80	94	64.56	45	85	2.099	1.07	0.000779761	0.012528	0.0529	0.0267
AT1G23840.1	protein_coding	-	-	140	134	183	243	184	225	91	139	168	269	245	298	201.56	133	271	2.097	1.068	1.49633e-08	1.04154e-06	0.0196	0.0156
AT5G39130.1	protein_coding	-	-	152	171	194	238	207	298	99	177	178	264	275	394	231.19	151	311	2.095	1.067	2.22079e-09	1.84704e-07	0.0176	0.015
AT1G44130.1	protein_coding	-	-	27	40	24	42	38	49	18	41	22	47	51	65	40.48	27	54	2.09	1.064	0.000932593	0.0144005	0.0458	0.0368
AT1G66570.2	protein_coding	ATSUC7, SUC7	sucrose-proton symporter 7	101	200	160	213	213	214	66	207	147	236	283	283	203.63	140	267	2.091	1.064	4.00589e-06	0.000152857	0.0314	0.0156
ATCG00340.1	protein_coding	PSAB		286399	97010	99838	231599	204672	168763	186962	100269	91562	256616	272204	223278	188482	126264	250699	2.09	1.063	1.2763e-05	0.000419203	0.041	0.0343
AT4G18990.1	protein_coding	XTH29	xyloglucan endotransglucosylase/hydrolase 29	257	246	255	421	280	391	168	254	234	466	372	517	335.34	219	452	2.088	1.062	2.63804e-09	2.16811e-07	0.019	0.0138
AT1G26380.1	protein_coding	FOX1, FOX, AtBBE3	FAD-LINKED OXIDOREDUCTASE, FAD-LINKED OXIDOREDUCTASE 1	191	185	149	291	268	193	125	191	137	322	356	255	231.13	151	311	2.087	1.061	1.91747e-10	1.99496e-08	0.0149	0.015
AT2G03850.1	protein_coding	-	-	22	24	13	29	26	28	14	25	12	32	35	37	25.81	17	35	2.086	1.061	0.00281501	0.0333786	0.0479	0.0521
AT5G16170.1	protein_coding	-	-	92	89	72	123	123	113	60	92	66	136	164	150	111.24	73	150	2.086	1.061	6.68064e-08	4.07871e-06	0.0177	0.0197
AT1G47510.3	protein_coding	5PTASE11, AT5PTASE11	ARABIDOPSIS THALIANA INOSITOL POLYPHOSPHATE 5-PHOSPHATASE 11, inositol polyphosphate 5-phosphatase 11	258	285	286	374	334	482	168	295	262	414	444	638	370.27	242	499	2.084	1.06	3.03893e-10	3.02575e-08	0.0169	0.0135
AT3G18282.1	protein_coding	-	-	44	15	22	47	27	35	29	16	20	52	36	46	33.12	22	45	2.082	1.058	0.000461618	0.00831063	0.0322	0.0419
AT1G24145.1	protein_coding	-	-	177	208	240	304	308	272	116	215	220	337	410	360	276.16	184	369	2.08	1.057	2.70865e-09	2.21304e-07	0.0182	0.0144
AT3G23110.1	protein_coding	RLP37, EMB2800, AtRLP37	EMBRYO DEFECTIVE 2800, receptor like protein 37	609	379	388	736	719	482	398	392	356	816	956	638	592.43	382	803	2.08	1.056	4.28064e-14	7.62256e-12	0.0119	0.0127
AT2G07739.1	protein_coding	-	-	529	345	428	737	477	627	345	357	393	817	634	830	562.5	365	760	2.078	1.055	2.80362e-14	5.15773e-12	0.0116	0.0128
AT3G51450.1	protein_coding	-	-	72	51	49	89	86	67	47	53	45	99	114	89	74.38	48	101	2.078	1.055	1.29103e-06	5.63005e-05	0.0193	0.0243
AT2G37430.1	protein_coding	ZAT11	zinc finger of Arabidopsis thaliana 11	18	26	32	45	34	29	12	27	29	50	45	38	33.57	23	44	2.077	1.054	0.00378906	0.0409877	0.0606	0.0422
AT2G02580.1	protein_coding	CYP71B9	"cytochrome P450, family 71, subfamily B, polypeptide 9"	32	41	50	90	38	54	21	42	46	100	51	71	55.14	36	74	2.075	1.053	0.00293938	0.0343802	0.0653	0.0293
AT5G46050.1	protein_coding	AtNPF5.2, ATPTR3, PTR3, NPF5.2	ARABIDOPSIS THALIANA PEPTIDE TRANSPORTER 3, NRT1/ PTR family 5.2, peptide transporter 3	326	340	361	513	493	448	213	351	331	568	656	593	452.02	298	606	2.073	1.052	8.94999e-12	1.09525e-09	0.0143	0.0131
ATCG00810.1	protein_coding	RPL22	ribosomal protein L22	3243	1698	1832	3374	2865	2949	2117	1755	1680	3738	3810	3902	2833.77	1851	3817	2.071	1.051	6.5108e-14	1.1304e-11	0.0134	0.0136
ATCG00800.1	protein_coding	-	-	5860	3002	3499	6057	5313	5386	3825	3103	3209	6711	7066	7126	5173.39	3379	6968	2.07	1.049	9.1252e-13	1.31341e-10	0.015	0.0154
AT1G69930.1	protein_coding	GSTU11, ATGSTU11	glutathione S-transferase TAU 11	133	214	162	250	241	219	87	221	149	277	321	290	223.97	152	296	2.068	1.048	3.84128e-07	1.9349e-05	0.0249	0.0151
AT5G39180.1	protein_coding	-	-	40	40	39	55	45	69	26	41	36	61	60	91	52.55	34	71	2.062	1.044	9.99686e-05	0.00236746	0.0304	0.0305
AT1G52565.1	protein_coding	-	-	184	247	244	343	274	330	120	255	224	380	364	437	296.71	200	394	2.06	1.043	1.6494e-07	9.14546e-06	0.024	0.0141
AT4G13820.1	protein_coding	-	-	144	135	99	206	195	132	94	140	91	228	259	175	164.43	108	221	2.061	1.043	3.29676e-09	2.63922e-07	0.0154	0.0167
AT5G44990.4	protein_coding	-	-	24	47	36	52	42	54	16	49	33	58	56	71	47.03	33	62	2.053	1.038	0.00148926	0.0206438	0.0514	0.033
AT2G27690.1	protein_coding	CYP94C1	"cytochrome P450, family 94, subfamily C, polypeptide 1"	87	75	62	138	80	98	57	78	57	153	106	130	96.69	64	130	2.052	1.037	8.22466e-06	0.000287387	0.0269	0.021
ATCG01200.1	tRNA	TRNI.3	tRNA-Ile	1043	328	407	918	706	593	681	339	373	1017	939	785	688.97	464	914	2.043	1.031	6.62217e-10	6.13191e-08	0.0178	0.0125
ATCG01190.1	tRNA	TRNA.2	tRNA-Ala	638	159	235	497	426	316	416	164	216	551	567	418	388.61	265	512	2.042	1.03	1.92396e-06	8.04905e-05	0.0292	0.0134
ATCG00370.1	tRNA	TRNS.3	tRNA-Ser	158	75	103	171	135	146	103	78	94	189	180	193	139.55	92	187	2.041	1.029	1.02487e-08	7.31874e-07	0.0152	0.0178
AT4G23320.2	protein_coding	CRK24	cysteine-rich RLK (RECEPTOR-like protein kinase) 24	99	85	80	152	108	108	65	88	73	168	144	143	113.47	75	152	2.036	1.026	5.61325e-07	2.6931e-05	0.0203	0.0195
AT1G62760.1	protein_coding	-	-	92	90	94	135	134	115	60	93	86	150	178	152	119.87	80	160	2.035	1.025	1.41053e-07	7.99656e-06	0.0179	0.019
ATCG00710.1	protein_coding	PSBH	photosystem II reaction center protein H	20590	10197	10536	21659	17462	15593	13441	10540	9663	23999	23224	20630	16915.9	11215	22618	2.033	1.023	4.18519e-10	3.96793e-08	0.0188	0.0207
ATCG00350.1	protein_coding	PSAA		308908	103762	110553	248419	222528	169927	201656	107248	101388	275253	295952	224818	201053	136764	265341	2.031	1.022	2.63669e-05	0.000771809	0.0409	0.0347
AT3G50200.1	protein_coding	-	-	33	31	37	75	42	30	22	32	34	83	56	40	44.36	29	60	2.027	1.02	0.00284167	0.0335909	0.0562	0.034
AT2G47190.1	protein_coding	MYB2, ATMYB2	myb domain protein 2, MYB DOMAIN PROTEIN 2	1137	1450	1652	1995	1596	2261	742	1499	1515	2210	2123	2991	1846.75	1252	2441	2.026	1.019	1.74242e-08	1.18925e-06	0.022	0.0128
AT5G13170.1	protein_coding	SAG29, SWEET15, AtSWEET15	senescence-associated gene 29	270	185	132	489	177	194	176	191	121	542	235	257	253.74	163	345	2.025	1.018	3.87302e-06	0.000149095	0.0289	0.0146
AT2G30660.2	protein_coding	-	-	52	23	44	64	49	46	34	24	40	71	65	61	49.17	33	66	2.02	1.015	0.000182214	0.00389663	0.0304	0.0315
AT3G53650.1	protein_coding	-	-	86	70	91	120	101	118	56	72	83	133	134	156	105.89	70	141	2.021	1.015	3.34398e-07	1.71072e-05	0.0179	0.0201
ATCG00090.1	tRNA	TRNS.1	tRNA-Ser	2706	1696	1534	3391	2265	2401	1766	1753	1407	3757	3012	3177	2478.75	1642	3315	2.021	1.015	2.4437e-13	3.9239e-11	0.0131	0.0133
AT1G10585.1	protein_coding	-	-	196	309	274	302	337	430	128	319	251	335	448	569	341.72	233	451	2.018	1.013	1.44935e-08	1.01414e-06	0.0191	0.0137
ATCG00940.1	tRNA	TRNA.1	tRNA-Ala	619	203	246	519	447	357	404	210	226	575	594	472	413.56	280	547	2.017	1.013	2.53633e-08	1.68155e-06	0.0204	0.0133
AT4G06240.1	snoRNA			49	48	62	77	73	68	32	50	57	85	97	90	68.47	46	91	2.014	1.01	2.80922e-05	0.000813736	0.0256	0.0256
ATCG00030.1	tRNA	TRNK	Lysine tRNA	766	452	470	857	702	703	500	467	431	950	934	930	701.93	466	938	2.014	1.01	5.89645e-15	1.18694e-12	0.0103	0.0125
ATCG00930.1	tRNA	TRNI.2	tRNA-Ile	978	275	281	729	592	465	638	284	258	808	787	615	565.11	393	737	2.015	1.01	2.28686e-07	1.21932e-05	0.0243	0.0127
AT2G07757.1	tRNA		pre-tRNA	77	50	58	93	82	76	50	52	53	103	109	101	77.96	52	104	2.013	1.009	2.7833e-06	0.00011173	0.0193	0.0237
AT5G10380.1	protein_coding	ATRING1, RING1		871	810	820	1195	1218	1026	569	837	752	1324	1620	1357	1076.54	719	1434	2.011	1.008	2.2166e-14	4.18877e-12	0.0113	0.0123
AT3G07195.1	protein_coding	-	-	81	57	88	107	111	89	53	59	81	119	148	118	96.07	64	128	2.008	1.006	5.63246e-06	0.000207788	0.0236	0.0211
AT3G63470.1	protein_coding	scpl40	serine carboxypeptidase-like 40	62	29	63	65	60	79	40	30	58	72	80	105	64.09	43	86	2.005	1.003	2.85154e-05	0.000824276	0.0239	0.0266
AT4G19720.1	protein_coding	-	-	123	124	160	213	149	196	80	128	147	236	198	259	174.78	118	231	2.005	1.003	6.47006e-07	3.05666e-05	0.0224	0.0163
AT2G38830.1	protein_coding	-	-	31	23	13	27	38	25	20	24	12	30	51	33	28.24	19	38	2.001	1.001	0.002745	0.0326847	0.041	0.0482
AT4G18470.1	protein_coding	SNI1	SUPPRESSOR OF NPR1-1, INDUCIBLE 1	39	9	15	35	20	23	25	9	14	39	27	30	24.05	16	32	2.001	1.001	0.00488759	0.0493905	0.0447	0.0534
AT3G28340.1	protein_coding	GATL10, GolS8	galacturonosyltransferase-like 10, galactinol synthase 8	353	452	429	645	443	600	230	467	393	715	589	794	531.45	363	699	1.991	0.994	9.24981e-07	4.15778e-05	0.0263	0.0128
AT5G55410.2	protein_coding	-	-	121	77	91	182	95	118	79	80	83	202	126	156	121.03	81	161	1.99	0.993	9.15112e-07	4.12677e-05	0.02	0.0188
AT1G22400.1	protein_coding	UGT85A1, ATUGT85A1	ARABIDOPSIS THALIANA UDP-GLUCOSYL TRANSFERASE 85A1	942	1249	1073	1635	1441	1344	615	1291	984	1812	1916	1778	1399.36	963	1835	1.989	0.992	1.46815e-08	1.02471e-06	0.0206	0.0125
AT5G18470.1	protein_coding	-	-	729	743	783	1075	1047	941	476	768	718	1191	1392	1245	965.08	654	1276	1.989	0.992	2.82637e-12	3.72103e-10	0.0131	0.0123
AT5G64000.1	protein_coding	SAL2, ATSAL2		408	329	333	521	557	380	266	340	305	577	741	503	455.43	304	607	1.985	0.989	8.93246e-12	1.09525e-09	0.0125	0.0131
AT3G28510.1	protein_coding	-	-	408	277	358	485	557	370	266	286	328	537	741	490	441.44	293	589	1.982	0.987	1.74374e-09	1.47681e-07	0.0165	0.0132
ATCG00230.1	tRNA	TRND	tRNA-Asp	29	35	33	44	58	32	19	36	30	49	77	42	42.27	28	56	1.982	0.987	0.000614433	0.0104714	0.0332	0.0356
AT2G38860.2	protein_coding	DJ1E, YLS5, DJ-1e		387	267	249	488	416	309	253	276	228	541	553	409	376.63	252	501	1.978	0.984	4.99179e-12	6.39018e-10	0.0115	0.0135
AT1G21550.1	protein_coding	-	-	80	98	102	135	109	134	52	101	94	150	145	177	119.82	82	157	1.977	0.983	7.18849e-06	0.00025667	0.0249	0.019
AT3G51440.1	protein_coding	-	-	338	275	286	391	419	398	221	284	262	433	557	527	380.7	256	506	1.976	0.983	1.76522e-12	2.40372e-10	0.011	0.0135
AT4G01870.1	protein_coding	-	-	733	643	633	964	1013	744	479	665	581	1068	1347	984	853.89	575	1133	1.974	0.981	1.41046e-13	2.37461e-11	0.0112	0.0124
AT3G48850.1	protein_coding	MPT2, PHT3;2	phosphate transporter 3;2, mitochondrial phosphate transporter 2	761	576	840	1057	956	887	497	595	770	1171	1271	1174	913.11	621	1205	1.972	0.98	2.87771e-11	3.34477e-09	0.0141	0.0124
AT3G48080.1	protein_coding	-	-	244	256	300	363	392	321	159	265	275	402	521	425	341.21	233	449	1.971	0.979	1.80272e-09	1.52212e-07	0.0155	0.0137
AT1G29290.1	protein_coding	-	-	178	341	311	408	249	450	116	352	285	452	331	595	355.41	251	459	1.968	0.977	0.000565252	0.00981997	0.0502	0.0136
AT3G04220.3	protein_coding	-	-	181	172	126	234	209	194	118	178	116	259	278	257	200.9	137	265	1.964	0.974	1.8906e-08	1.28095e-06	0.0159	0.0156
AT4G01430.2	protein_coding	UMAMIT29	Usually multiple acids move in and out Transporters 29	465	273	400	502	477	514	304	282	367	556	634	680	470.54	318	623	1.964	0.974	2.32054e-12	3.09914e-10	0.0114	0.013
ATCG00320.1	tRNA	TRNFM	tRNA-Phe	28	35	30	47	36	42	18	36	28	52	48	56	39.58	27	52	1.964	0.974	0.00142238	0.0198854	0.0391	0.0372
AT5G22540.1	protein_coding	-	-	247	340	327	472	353	398	161	351	300	523	469	527	388.6	271	506	1.962	0.972	3.12753e-06	0.000123233	0.0273	0.0134
AT1G21520.1	protein_coding	-	-	3525	4370	6279	6248	5350	6957	2301	4517	5758	6923	7115	9204	5969.81	4192	7747	1.96	0.971	3.50174e-07	1.78814e-05	0.025	0.016
AT1G30040.2	protein_coding	ATGA2OX2, GA2OX2	gibberellin 2-oxidase, GIBBERELLIN 2-OXIDASE 2	280	171	219	323	263	295	183	177	201	358	350	390	276.39	187	366	1.959	0.97	2.38347e-11	2.78195e-09	0.0111	0.0143
AT3G51860.1	protein_coding	CAX1-LIKE, ATHCX1, ATCAX3, CAX3	cation exchanger 3	1830	1427	1457	2322	2299	1696	1195	1475	1336	2573	3058	2244	1980	1335	2625	1.958	0.969	7.76093e-13	1.13469e-10	0.0124	0.0129
AT4G21680.1	protein_coding	AtNPF7.2, NPF7.2, NRT1.8	NRT1/ PTR family 7.2, NITRATE TRANSPORTER 1.8	3145	2521	2571	4014	3713	3253	2053	2606	2358	4448	4938	4304	3451.02	2339	4563	1.957	0.969	1.38811e-12	1.92802e-10	0.0129	0.0141
AT4G35070.1	protein_coding	-	-	201	147	194	253	233	232	131	152	178	280	310	307	226.37	154	299	1.958	0.969	8.42453e-10	7.67295e-08	0.013	0.0151
AT5G22570.1	protein_coding	WRKY38, ATWRKY38	WRKY DNA-binding protein 38, ARABIDOPSIS THALIANA WRKY DNA-BINDING PROTEIN 38	648	678	678	1096	733	877	423	701	622	1214	975	1160	849.19	582	1116	1.954	0.967	4.13942e-08	2.63736e-06	0.0204	0.0124
AT5G61490.1	protein_coding	-	-	38	31	46	61	59	35	25	32	42	68	78	46	48.57	33	64	1.954	0.966	0.00158464	0.0215255	0.0437	0.032
AT3G11010.1	protein_coding	RLP34, AtRLP34	receptor like protein 34	1662	932	1091	1635	1958	1251	1085	963	1001	1812	2604	1655	1519.93	1016	2024	1.953	0.965	1.05238e-09	9.36985e-08	0.0168	0.0125
AT4G36950.1	protein_coding	MAPKKK21	mitogen-activated protein kinase kinase kinase 21	109	63	97	144	90	119	71	65	89	160	120	157	110.32	75	146	1.948	0.962	9.09279e-07	4.10713e-05	0.0175	0.0197
AT4G31500.1	protein_coding	RNT1, RED1, SUR2, ATR4, CYP83B1	RED ELONGATED 1, SUPERROOT 2, ALTERED TRYPTOPHAN REGULATION 4, RUNT 1, "cytochrome P450, family 83, subfamily B, polypeptide 1"	2891	2453	2661	3779	3541	3295	1887	2535	2440	4187	4709	4359	3353.17	2287	4418	1.945	0.96	4.2261e-12	5.48584e-10	0.0132	0.014
AT4G35180.2	protein_coding	LHT7	LYS/HIS transporter 7	2092	2066	2220	3166	2592	2706	1366	2135	2036	3508	3447	3580	2678.73	1846	3512	1.939	0.955	9.78959e-10	8.77242e-08	0.0167	0.0135
AT1G26420.1	protein_coding	AtBBE7		133	152	122	209	158	172	87	157	112	232	210	228	170.85	119	223	1.937	0.954	2.97402e-06	0.000118022	0.0231	0.0165
AT5G54490.1	protein_coding	PBP1	pinoid-binding protein 1	79	121	99	169	118	111	52	125	91	187	157	147	126.41	89	164	1.937	0.954	0.000316953	0.00613562	0.0399	0.0185
AT1G45145.1	protein_coding	TRX-h5, ATTRX5, LIV1, ATH5, TRX5	thioredoxin H-type 5, THIOREDOXIN H-TYPE 5, LOCUS OF INSENSITIVITY TO VICTORIN 1	1738	1816	2043	2989	2006	2484	1135	1877	1874	3312	2668	3286	2358.56	1629	3089	1.936	0.953	1.51188e-07	8.49358e-06	0.0224	0.0132
AT1G21140.1	protein_coding	AtVTL1, VTL1	Vacuolar Iron Transporter-Like 1	62	57	84	98	106	65	40	59	77	109	141	86	85.33	59	112	1.931	0.949	0.000327801	0.00629301	0.0362	0.0225
AT1G73805.1	protein_coding	SARD1	SAR Deficient 1	1403	1376	1406	1821	1895	1796	916	1422	1289	2018	2520	2376	1756.95	1209	2305	1.93	0.949	9.17745e-13	1.31413e-10	0.0119	0.0127
AT2G18690.1	protein_coding	-	-	900	1276	1328	1560	1358	1644	588	1319	1218	1729	1806	2175	1472.32	1042	1903	1.927	0.947	2.30948e-07	1.22902e-05	0.0225	0.0125
AT1G06520.1	protein_coding	sn-2-GPAT1, ATGPAT1, GPAT1	GLYCEROL-3-PHOSPHATE sn-2-ACYLTRANSFERASE 1	123	92	88	158	132	107	80	95	81	175	176	142	124.71	85	164	1.927	0.946	3.66431e-07	1.8575e-05	0.016	0.0186
AT3G61190.2	protein_coding	BAP1	BON association protein 1	122	146	146	225	174	151	80	151	134	249	231	200	174.16	122	227	1.927	0.946	1.71451e-05	0.000543073	0.0277	0.0164
AT1G62480.1	protein_coding	-	-	1389	1392	1800	2038	1644	2331	907	1439	1651	2258	2186	3084	1920.81	1332	2509	1.919	0.941	8.50425e-10	7.72025e-08	0.0159	0.0128
AT3G57950.1	protein_coding	-	-	395	312	353	516	457	413	258	322	324	572	608	546	438.34	301	575	1.92	0.941	4.56696e-11	5.19941e-09	0.012	0.0132
AT4G13890.2	protein_coding	SHM5, EDA36, EDA37	EMBRYO SAC DEVELOPMENT ARREST 36, EMBRYO SAC DEVELOPMENT ARREST 37, SERINE HYDROXYMETHYLTRANSFERASE 5	39	17	26	42	31	31	25	18	24	47	41	41	32.61	22	43	1.92	0.941	0.00179819	0.0237979	0.0324	0.0425
ATCG00310.1	tRNA	TRNG.2	tRNA-Gly	80	45	58	84	101	55	52	47	53	93	134	73	75.35	51	100	1.919	0.941	0.000176373	0.00379508	0.0301	0.0241
ATCG00690.1	protein_coding	PSBT, PSBTC	photosystem II reaction center protein T	4152	2980	4383	5326	3010	7526	2710	3080	4020	5901	4003	9957	4945.3	3270	6620	1.917	0.939	2.41252e-07	1.2814e-05	0.0228	0.0153
AT3G48580.1	protein_coding	XTH11	xyloglucan endotransglucosylase/hydrolase 11	138	173	133	212	157	212	90	179	122	235	209	280	185.84	130	241	1.915	0.937	2.12587e-05	0.000651097	0.0282	0.016
AT5G67420.2	protein_coding	ASL39, LBD37	ASYMMETRIC LEAVES2-LIKE 39, LOB domain-containing protein 37	29	34	60	55	53	48	19	35	55	61	70	64	50.67	36	65	1.915	0.937	0.00236496	0.0292112	0.0455	0.0311
AT1G08050.1	protein_coding	-	-	169	75	111	139	174	133	110	78	102	154	231	176	141.84	97	187	1.91	0.934	2.17081e-05	0.000659048	0.0264	0.0176
AT1G17610.1	protein_coding	CHS1	CHILLING SENSITIVE 1	40	67	40	57	82	53	26	69	37	63	109	70	62.4	44	81	1.911	0.934	0.00013303	0.00300039	0.0248	0.0273
AT1G76960.1	protein_coding	-	-	5272	4133	4506	7547	5161	5486	3442	4272	4132	8362	6864	7258	5721.69	3949	7495	1.9	0.926	5.59416e-09	4.22283e-07	0.0176	0.0158
AT5G05300.1	protein_coding	-	-	57	97	79	125	76	101	37	100	72	139	101	134	97.19	70	125	1.897	0.924	0.00216063	0.0272686	0.051	0.021
AT5G59820.1	protein_coding	ZAT12, RHL41, AtZAT12	RESPONSIVE TO HIGH LIGHT 41	101	156	164	235	171	143	66	161	150	260	227	189	175.76	126	225	1.898	0.924	0.000725483	0.0118758	0.0448	0.0163
AT1G01480.1	protein_coding	AT-ACC2, ACS2	1-amino-cyclopropane-1-carboxylate synthase 2	32	19	30	32	45	28	21	20	28	35	60	37	33.4	23	44	1.896	0.923	0.00484636	0.0491508	0.0441	0.0422
AT1G72240.1	protein_coding	-	-	77	56	93	107	91	90	50	58	85	119	121	119	92.02	64	120	1.895	0.922	3.76551e-05	0.00105766	0.0239	0.0216
AT5G67310.1	protein_coding	CYP81G1	"cytochrome P450, family 81, subfamily G, polypeptide 1"	472	481	595	744	584	671	308	497	546	824	777	888	639.96	450	830	1.893	0.921	1.97812e-08	1.33374e-06	0.0172	0.0126
AT1G47890.1	protein_coding	AtRLP7, RLP7	receptor like protein 7	591	401	480	697	698	501	386	414	440	772	928	663	600.65	413	788	1.892	0.92	3.4138e-10	3.31202e-08	0.0134	0.0127
AT1G56120.3	protein_coding	-	-	96	68	84	124	113	83	63	70	77	137	150	110	101.25	70	132	1.891	0.919	1.37904e-05	0.000445964	0.0212	0.0205
AT1G35910.1	protein_coding	AtTPPD, TPPD	trehalose-6-phosphate phosphatase D	364	350	318	492	392	448	238	362	292	545	521	593	425.04	297	553	1.889	0.918	6.93062e-09	5.16155e-07	0.0152	0.0132
AT2G29350.2	protein_coding	SAG13	senescence-associated gene 13	2487	1774	2954	3209	2869	3023	1624	1834	2709	3556	3816	4000	2922.84	2056	3791	1.888	0.917	1.213e-09	1.06297e-07	0.0156	0.0137
AT2G30750.1	protein_coding	CYP71A12	cytochrome P450, family 71, subfamily A, polypeptide 12	145	138	60	205	144	88	95	143	55	227	192	116	137.9	98	178	1.889	0.917	1.00345e-05	0.000342865	0.0222	0.0178
AT5G19240.1	protein_coding	-	-	254	287	252	344	351	326	166	297	231	381	467	431	328.81	231	426	1.888	0.917	3.86794e-09	3.07873e-07	0.0139	0.0138
AT3G17790.1	protein_coding	PAP17, ATACP5, ATPAP17	purple acid phosphatase 17	1419	1366	1764	2110	1594	2168	926	1412	1618	2338	2120	2868	1880.36	1319	2442	1.887	0.916	4.96771e-09	3.82266e-07	0.0167	0.0128
AT3G29034.1	protein_coding	-	-	323	319	441	519	410	456	211	330	404	575	545	603	444.78	315	574	1.885	0.915	1.51349e-07	8.49358e-06	0.0189	0.0131
ATMG00230.1	tRNA	TRNS.1	tRNA-Ser	60	52	65	88	87	55	39	54	60	98	116	73	73.08	51	96	1.882	0.913	0.000302922	0.00592179	0.0305	0.0246
AT1G08450.1	protein_coding	CRT3, AtCRT3, EBS2, PSL1	A. thaliana calreticulin 3, EMS-MUTAGENIZED BRI1 SUPPRESSOR 2, calreticulin 3, PRIORITY IN SWEET LIFE 1	2860	1846	2117	3161	3106	2403	1867	1908	1942	3502	4131	3179	2754.84	1906	3604	1.881	0.911	5.64459e-11	6.32262e-09	0.0133	0.0135
AT3G50480.1	protein_coding	HR4	homolog of RPW8 4	1098	1443	1392	1680	1686	1650	717	1491	1277	1861	2242	2183	1628.61	1162	2095	1.881	0.911	1.21718e-08	8.60358e-07	0.0173	0.0126
ATCG01090.1	protein_coding	NDHI		5036	2517	3007	4445	3694	4895	3288	2602	2758	4925	4913	6476	4160.17	2883	5438	1.879	0.91	5.49008e-09	4.16691e-07	0.0169	0.0147
ATCG00620.1	tRNA	TRNP	tRNA-Pro	39	24	30	61	26	34	25	25	28	68	35	45	37.49	26	49	1.877	0.908	0.00302855	0.0350689	0.0379	0.0381
AT3G17185.2	ncRNA	TASIR-ARF	TAS3/TASIR-ARF (TRANS-ACTING SIRNA3); other RNA	30	26	24	36	25	42	20	27	22	40	33	56	32.86	23	43	1.872	0.905	0.0047212	0.0481984	0.0406	0.0427
AT4G15417.2	protein_coding	ATRTL1, RTL1	RNAse II-like 1	45	57	52	72	64	61	29	59	48	80	85	81	63.6	45	82	1.872	0.905	0.000368925	0.00695275	0.0291	0.0268
AT2G32960.1	protein_coding	PFA-DSP2, AtPFA-DSP2	plant and fungi atypical dual-speci&#64257;city phosphatase 2	98	62	85	120	90	99	64	64	78	133	120	131	98.27	69	128	1.871	0.904	6.88492e-06	0.000246147	0.018	0.0208
AT1G21245.1	protein_coding	-	-	34	45	49	45	67	53	22	47	45	50	89	70	53.79	38	70	1.871	0.903	0.000369294	0.00695393	0.0256	0.03
AT1G01680.1	protein_coding	ATPUB54, PUB54	plant U-box 54, PLANT U-BOX 54	231	278	209	296	344	274	151	287	192	328	458	363	296.3	210	383	1.867	0.901	5.0264e-09	3.84998e-07	0.0132	0.0141
AT1G04580.1	protein_coding	AO4, AAO4, ATAO2, ATAO-4	ALDEHYDE OXIDASE 2, arabdopsis thaliana aldehyde oxidase 4, aldehyde oxidase 4	233	119	168	213	224	205	152	123	154	236	298	271	205.72	143	268	1.865	0.899	3.15452e-07	1.63488e-05	0.0167	0.0155
AT3G15518.1	protein_coding	-	-	168	213	261	306	230	274	110	220	239	339	306	363	262.77	190	336	1.859	0.895	2.16087e-05	0.000657467	0.0268	0.0145
AT5G65300.1	protein_coding	-	-	337	328	435	521	401	470	220	339	399	577	533	622	448.39	319	577	1.859	0.895	1.11864e-07	6.5146e-06	0.0176	0.0131
AT2G32210.3	protein_coding	-	-	139	129	138	208	171	140	91	133	127	230	227	185	165.62	117	214	1.858	0.894	3.89221e-06	0.000149339	0.0201	0.0166
AT4G13880.1	protein_coding	AtRLP48, RLP48	receptor like protein 48	175	140	125	187	214	156	114	145	115	207	285	206	178.63	125	233	1.859	0.894	5.75732e-08	3.55406e-06	0.0134	0.0162
AT4G00700.2	protein_coding	-	-	1939	1084	1354	1993	1909	1514	1266	1120	1242	2208	2539	2003	1729.7	1209	2250	1.853	0.89	2.44838e-10	2.47322e-08	0.0134	0.0127
AT1G66090.1	protein_coding	-	-	144	225	188	290	173	244	94	233	172	321	230	323	228.87	166	291	1.849	0.887	0.000770032	0.0124148	0.0426	0.015
AT2G08905.1	snoRNA			34	23	45	42	29	57	22	24	41	47	39	75	41.29	29	54	1.849	0.887	0.00123696	0.0177763	0.0273	0.0359
AT5G25250.1	protein_coding	FLOT1	flotillin 1	1140	1448	1378	1704	1630	1644	744	1497	1264	1888	2168	2175	1622.59	1168	2077	1.848	0.886	3.18609e-08	2.08031e-06	0.0173	0.0126
AT5G60950.1	protein_coding	COBL5	COBRA-like protein 5 precursor	69	55	60	75	77	79	45	57	55	83	102	105	74.49	52	97	1.847	0.885	4.26223e-05	0.00116851	0.0191	0.0243
AT2G20722.1	snoRNA		snoRNA	39	32	98	64	41	98	25	33	90	71	55	130	67.25	49	85	1.846	0.884	0.000629396	0.0106415	0.0299	0.0259
AT4G01895.1	protein_coding	-	-	47	56	55	85	57	59	31	58	50	94	76	78	64.51	46	83	1.844	0.883	0.00136382	0.0191785	0.0371	0.0265
AT4G19970.1	protein_coding	-	-	180	229	172	271	202	257	118	237	158	300	269	340	236.81	171	303	1.844	0.883	3.12186e-05	0.000894003	0.0268	0.0149
AT5G46350.1	protein_coding	ATWRKY8, WRKY8	ARABIDOPSIS THALIANA WRKY DNA-BINDING PROTEIN 8, WRKY DNA-binding protein 8	65	57	61	75	84	71	42	59	56	83	112	94	74.34	52	96	1.84	0.88	5.49507e-05	0.00144416	0.0196	0.0243
AT2G25460.2	protein_coding	-	-	88	63	63	72	114	84	57	65	58	80	152	111	87.14	60	114	1.838	0.878	8.909e-05	0.00216031	0.0233	0.0223
AT3G13100.1	protein_coding	ABCC7, ATMRP7, MRP7	multidrug resistance-associated protein 7, ATP-binding cassette C7	696	437	509	732	771	539	454	452	467	811	1025	713	653.74	458	850	1.836	0.877	1.1792e-09	1.03661e-07	0.0131	0.0126
AT4G23610.1	protein_coding	-	-	106	121	109	162	115	146	69	125	100	179	153	193	136.64	98	175	1.835	0.875	5.88572e-05	0.00152234	0.0257	0.0179
AT5G01195.1	snoRNA			31	25	26	34	40	29	20	26	24	38	53	38	33.19	23	43	1.835	0.875	0.00329152	0.0372433	0.0315	0.0423
AT2G14560.3	protein_coding	LURP1	LATE UPREGULATED IN RESPONSE TO HYALOPERONOSPORA PARASITICA	7907	8130	8914	11440	8964	10935	5162	8403	8175	12676	11922	14467	10134.1	7247	13022	1.833	0.874	8.64293e-07	3.94888e-05	0.0221	0.0182
AT4G08125.1	snoRNA			26	35	41	45	38	44	17	36	38	50	51	58	41.56	30	53	1.832	0.873	0.00364485	0.0398466	0.0385	0.0358
AT5G52900.1	protein_coding	MAKR6	MEMBRANE-ASSOCIATED KINASE REGULATOR 6	68	38	47	84	33	77	44	39	43	93	44	102	60.93	42	80	1.83	0.872	0.00097714	0.0148844	0.0315	0.0273
AT1G69880.1	protein_coding	ATH8, TH8	thioredoxin H-type 8	768	917	1013	1180	985	1187	501	948	929	1307	1310	1570	1094.35	793	1396	1.825	0.868	1.90347e-07	1.03883e-05	0.0185	0.0123
AT4G08785.1	lncRNA			247	140	184	303	211	190	161	145	169	336	281	251	223.74	158	289	1.824	0.867	1.46122e-07	8.26703e-06	0.0146	0.0151
AT1G61610.2	protein_coding	-	-	60	26	29	46	41	49	39	27	27	51	55	65	43.83	31	57	1.822	0.866	0.00266998	0.0320086	0.0349	0.034
AT5G03890.1	protein_coding	-	-	36	39	24	44	39	39	24	40	22	49	52	52	39.67	29	51	1.823	0.866	0.00327117	0.0371049	0.0351	0.037
AT1G74080.1	protein_coding	ATMYB122, MYB122	MYB DOMAIN PROTEIN 122, myb domain protein 122	49	69	45	59	72	71	32	71	41	65	96	94	66.61	48	85	1.821	0.865	0.000437116	0.00795718	0.0268	0.0261
AT3G26230.1	protein_coding	CYP71B24	"cytochrome P450, family 71, subfamily B, polypeptide 24"	81	79	59	71	98	105	53	82	54	79	130	139	89.43	63	116	1.822	0.865	0.000135012	0.00303685	0.0244	0.022
AT1G02460.1	protein_coding	-	-	109	63	84	104	110	98	71	65	77	115	146	130	100.75	71	130	1.819	0.863	2.37028e-05	0.000707999	0.0192	0.0206
AT1G73260.1	protein_coding	ATKTI1, KTI1	kunitz trypsin inhibitor 1, ARABIDOPSIS THALIANA KUNITZ TRYPSIN INHIBITOR 1	412	570	343	877	374	463	269	589	315	972	497	613	542.39	391	694	1.819	0.863	0.00259788	0.0314452	0.052	0.0128
AT4G17500.1	protein_coding	AtERF#100, ERF1A, ERF-1, ATERF-1	ethylene responsive element binding factor 1	150	100	181	206	184	137	98	103	166	228	245	181	170.25	122	218	1.819	0.863	0.000127727	0.00289406	0.0292	0.0165
AT5G42900.2	protein_coding	COR27	cold regulated gene 27	918	642	661	1244	770	770	599	664	606	1378	1024	1019	881.7	623	1140	1.818	0.862	1.73946e-09	1.47681e-07	0.0133	0.0124
AT5G24240.1	protein_coding	AtPI4K&#947;3		32	22	32	32	34	40	21	23	29	35	45	53	34.43	24	44	1.816	0.861	0.0032041	0.036568	0.0302	0.0411
AT4G39950.2	protein_coding	CYP79B2	"cytochrome P450, family 79, subfamily B, polypeptide 2"	1533	1222	1133	1808	1521	1462	1001	1263	1039	2003	2023	1934	1543.88	1101	1987	1.814	0.86	6.01758e-11	6.65986e-09	0.0116	0.0125
AT1G72930.1	protein_coding	TN10, AtTN10, TIR	toll/interleukin-1 receptor-like, TIR-nucleotide binding site family 10	5557	6729	7282	9051	7311	7833	3628	6955	6678	10029	9723	10363	7896.05	5754	10038	1.814	0.859	9.34563e-06	0.0003217	0.026	0.0171
AT5G05600.2	protein_coding	-	-	387	290	283	535	373	295	253	300	260	593	496	390	381.85	271	493	1.81	0.856	1.04057e-07	6.09831e-06	0.0155	0.0135
AT2G29490.1	protein_coding	GSTU1, ATGSTU1, GST19	GLUTATHIONE S-TRANSFERASE 19, glutathione S-transferase TAU 1	1879	1910	1753	2610	2294	1961	1227	1974	1608	2892	3051	2594	2224.29	1603	2846	1.805	0.852	1.82209e-08	1.24059e-06	0.0157	0.0131
AT3G25882.1	protein_coding	NIMIN-2	NIM1-interacting 2	702	775	792	1116	790	912	458	801	726	1237	1051	1207	913.24	662	1165	1.804	0.852	1.50399e-06	6.4774e-05	0.0207	0.0124
AT1G13340.1	protein_coding	ISTL6	IST1-LIKE 6	1425	1498	1514	2143	1590	1768	930	1548	1388	2374	2115	2339	1782.55	1289	2276	1.804	0.851	3.94071e-07	1.97241e-05	0.0191	0.0127
AT1G67000.1	protein_coding	-	-	50	33	33	57	51	34	33	34	30	63	68	45	45.5	32	59	1.801	0.849	0.00133705	0.0188825	0.0267	0.0332
AT2G06065.1	lncRNA			36	29	55	58	33	55	24	30	50	64	44	73	47.47	35	60	1.8	0.848	0.00303087	0.0350811	0.0353	0.0324
AT3G09525.1	lncRNA			61	28	56	74	59	41	40	29	51	82	78	54	55.8	40	71	1.796	0.845	0.00348439	0.0385476	0.0399	0.0288
AT2G40750.1	protein_coding	WRKY54, ATWRKY54	WRKY DNA-binding protein 54, WRKY DNA-BINDING PROTEIN 54	489	514	589	741	548	662	319	531	540	821	729	876	636.06	463	809	1.788	0.839	7.7863e-07	3.61698e-05	0.0186	0.0126
AT3G20760.1	protein_coding	-	-	733	655	1216	1244	787	1086	479	677	1115	1378	1047	1437	1022.09	757	1287	1.787	0.837	1.19078e-05	0.00039615	0.0243	0.0123
AT2G21187.2	lncRNA		other RNA	119	77	97	138	93	123	78	80	89	153	124	163	114.26	82	147	1.785	0.836	1.16601e-05	0.000389778	0.0167	0.0193
AT2G35382.1	snoRNA		snoRNA	28	30	64	39	26	89	18	31	59	43	35	118	50.59	36	65	1.786	0.836	0.0031896	0.0364917	0.0332	0.0313
AT3G48640.2	protein_coding	-	-	59	99	127	114	106	117	39	102	116	126	141	155	113.23	86	141	1.786	0.836	0.00104258	0.0157231	0.0359	0.0195
AT1G25550.2	protein_coding	-	-	182	184	190	241	221	215	119	190	174	267	294	284	221.44	161	282	1.784	0.835	7.85518e-07	3.64289e-05	0.0155	0.0152
AT1G74010.1	protein_coding	-	-	945	750	845	1254	835	1021	617	775	775	1389	1111	1351	1002.97	722	1284	1.781	0.833	1.34223e-08	9.43944e-07	0.0141	0.0123
AT4G18610.1	protein_coding	LSH9	LIGHT SENSITIVE HYPOCOTYLS 9	99	48	77	94	85	85	65	50	71	104	113	112	85.75	62	110	1.781	0.833	0.000112081	0.00260762	0.0208	0.0223
AT1G55775.1	protein_coding	-	-	77	81	96	114	99	95	50	84	88	126	132	126	100.95	74	128	1.778	0.83	0.000167621	0.00363492	0.0241	0.0206
AT3G48100.1	protein_coding	ARR5, RR5, ATRR2, IBC6	response regulator 5, ARABIDOPSIS THALIANA RESPONSE REGULATOR 2, INDUCED BY CYTOKININ 6	96	64	105	129	99	90	63	66	96	143	132	119	103.13	75	131	1.777	0.83	0.000207303	0.00434289	0.0252	0.0203
AT1G02230.1	protein_coding	ANAC004, NAC004	NAC domain containing protein 4	283	277	248	298	367	316	185	286	227	330	488	418	322.47	233	412	1.775	0.828	6.27568e-09	4.71974e-07	0.0112	0.0139
AT1G51890.2	protein_coding	-	-	593	574	471	687	724	572	387	593	432	761	963	757	648.87	471	827	1.775	0.828	3.11279e-10	3.06632e-08	0.0107	0.0126
AT4G18250.1	protein_coding	-	-	96	89	69	126	100	82	63	92	63	140	133	108	99.84	73	127	1.774	0.827	8.37685e-05	0.0020494	0.0208	0.0207
AT5G02490.1	protein_coding	AtHsp70-2, Hsp70-2		3957	3286	4370	5048	4648	4286	2583	3396	4008	5593	6182	5670	4572.11	3329	5815	1.773	0.827	9.88031e-08	5.80264e-06	0.0168	0.015
AT4G38560.1	protein_coding	-	-	372	316	272	396	413	346	243	327	249	439	549	458	377.45	273	482	1.772	0.826	3.16035e-09	2.53732e-07	0.011	0.0135
AT3G01313.1	snoRNA		snoRNA	56	68	142	86	73	157	37	70	130	95	97	208	106.19	79	133	1.771	0.825	0.000198018	0.00417349	0.0239	0.0201
AT5G09470.1	protein_coding	DIC3	dicarboxylate carrier 3	116	95	113	173	119	104	76	98	104	192	158	138	127.52	93	163	1.769	0.823	0.00011602	0.00268578	0.0239	0.0184
AT2G25297.2	protein_coding	-	-	89	142	146	153	123	175	58	147	134	170	164	232	150.57	113	189	1.768	0.822	0.00054488	0.00950767	0.0323	0.0173
AT4G37530.1	protein_coding	-	-	663	579	594	804	689	721	433	598	545	891	916	954	722.85	525	920	1.768	0.822	1.48206e-09	1.27068e-07	0.0117	0.0125
AT3G48520.1	protein_coding	CYP94B3	cytochrome P450, family 94, subfamily B, polypeptide 3	98	79	87	130	99	90	64	82	80	144	132	119	103.37	75	132	1.767	0.821	7.77335e-05	0.00192285	0.0205	0.0203
AT1G13750.1	protein_coding	ATPAP1, PAP1	PURPLE ACID PHOSPHATASE 1, ARABIDOPSIS THALIANA PURPLE ACID PHOSPHATASE 1	101	90	75	112	115	92	66	93	69	124	153	122	104.42	76	133	1.762	0.817	2.61932e-05	0.000768342	0.0168	0.0202
AT3G13130.1	protein_coding	-	-	112	116	137	158	106	181	73	120	126	175	141	239	145.69	106	185	1.762	0.817	0.000110697	0.00258192	0.0242	0.0175
AT5G20250.2	protein_coding	RS6, DIN10	raffinose synthase 6, DARK INDUCIBLE 10	269	164	172	260	225	226	176	170	158	288	299	299	231.53	168	295	1.76	0.816	1.18258e-07	6.82971e-06	0.0123	0.015
AT2G41100.3	protein_coding	TCH3, CML12, ATCAL4	ARABIDOPSIS THALIANA CALMODULIN LIKE 4, calmodulin-like 12, TOUCH 3	3198	4371	4435	4882	4683	4706	2088	4518	4067	5409	6228	6226	4756.09	3558	5954	1.759	0.815	6.18853e-06	0.00022531	0.0225	0.0151
AT1G51860.1	protein_coding	-	-	315	195	244	283	305	302	206	202	224	314	406	400	291.62	211	373	1.758	0.814	7.91326e-08	4.73755e-06	0.0127	0.0142
AT3G26470.1	protein_coding	-	-	684	565	732	993	808	605	447	584	671	1100	1075	800	779.52	567	992	1.758	0.814	4.01901e-06	0.000153147	0.0204	0.0124
AT5G08240.1	protein_coding	-	-	347	364	416	527	402	426	227	376	382	584	535	564	444.41	328	561	1.755	0.812	4.13645e-06	0.000157406	0.0195	0.0131
AT5G20950.1	protein_coding	-	-	1304	954	968	1417	1339	1090	851	986	888	1570	1781	1442	1253.01	908	1598	1.756	0.812	1.85047e-10	1.93249e-08	0.0107	0.0124
AT2G17040.1	protein_coding	NAC036, anac036	NAC domain containing protein 36	907	892	905	1152	1068	1019	592	922	830	1276	1420	1348	1064.84	781	1348	1.754	0.811	4.74094e-09	3.66848e-07	0.0126	0.0123
AT4G20830.1	protein_coding	AtBBE20, AtBBE19		2022	2516	2281	3005	2495	2653	1320	2601	2092	3330	3318	3510	2695.04	2004	3386	1.754	0.81	4.1462e-06	0.000157561	0.0213	0.0135
AT4G26200.1	protein_coding	ACS7, ATACS7, ACCS7	1-amino-cyclopropane-1-carboxylate synthase 7	84	112	88	142	104	96	55	116	81	157	138	127	112.33	84	141	1.753	0.81	0.000942408	0.0144834	0.0326	0.0195
AT3G47540.1	protein_coding	-	-	256	307	292	376	285	364	167	317	268	417	379	482	338.24	251	426	1.751	0.808	1.68873e-05	0.000535517	0.0216	0.0138
ATCG00990.1	tRNA	TRNN.1	tRNA-Asn	111	118	94	191	115	93	72	122	86	212	153	123	128.04	93	163	1.749	0.807	0.000837604	0.0132429	0.0324	0.0184
AT1G66400.1	protein_coding	CML23	calmodulin like 23	795	919	1061	1251	887	1187	519	950	973	1386	1180	1570	1096.36	814	1379	1.748	0.806	9.7636e-06	0.00033443	0.0222	0.0123
AT2G07605.1	snoRNA			290	196	471	353	321	409	189	203	432	391	427	541	363.84	275	453	1.748	0.806	2.87124e-06	0.000114667	0.0179	0.0136
AT1G07050.2	protein_coding	-	-	104	129	82	155	129	93	68	133	75	172	172	123	123.8	92	156	1.747	0.805	0.000231577	0.00475109	0.0251	0.0187
AT1G65790.3	protein_coding	ARK1, RK1	receptor kinase 1	447	426	326	502	523	401	292	440	299	556	696	531	468.9	344	594	1.748	0.805	4.16816e-09	3.30821e-07	0.0111	0.013
AT4G27740.1	protein_coding	-	-	139	155	136	163	172	178	91	160	125	181	229	235	170.09	125	215	1.748	0.805	4.84795e-06	0.000181498	0.0159	0.0165
AT1G05997.1	snoRNA			55	50	69	67	59	81	36	52	63	74	78	107	68.46	50	86	1.746	0.804	0.000456751	0.00824162	0.022	0.0256
AT5G47220.1	protein_coding	ATERF-2, ATERF2, ERF2	ETHYLENE RESPONSIVE ELEMENT BINDING FACTOR 2, ethylene responsive element binding factor 2, ETHYLENE RESPONSE FACTOR- 2	292	295	383	396	349	405	191	305	351	439	464	536	380.92	282	480	1.747	0.804	5.63027e-07	2.69661e-05	0.0155	0.0135
AT5G00755.1	snoRNA			32	17	82	42	28	74	21	18	75	47	37	98	49.22	38	61	1.745	0.803	0.00464304	0.0476113	0.0326	0.0316
AT1G66580.1	protein_coding	SAG24, RPL10C	senescence associated gene 24, ribosomal protein L10 C	10064	10289	10618	13947	11915	11135	6570	10635	9738	15454	15846	14732	12162.4	8981	15344	1.743	0.801	6.40276e-06	0.00023099	0.0221	0.0191
AT3G11150.2	protein_coding	-	-	56	24	61	58	41	62	37	25	56	64	55	82	53.02	39	67	1.742	0.801	0.00165022	0.0221349	0.0259	0.0299
AT4G04540.2	protein_coding	CRK39	cysteine-rich RLK (RECEPTOR-like protein kinase) 39	247	288	232	288	316	306	161	298	213	319	420	405	302.65	224	381	1.742	0.801	3.19745e-07	1.64485e-05	0.0139	0.0141
AT4G23885.1	protein_coding	-	-	621	531	605	756	628	703	405	549	555	838	835	930	685.34	503	868	1.742	0.801	6.49453e-09	4.86285e-07	0.012	0.0125
AT4G34131.1	protein_coding	UGT73B3	UDP-glucosyl transferase 73B3	531	242	382	479	530	328	347	250	350	531	705	434	436.11	316	557	1.742	0.801	5.28035e-05	0.00139965	0.0249	0.0132
AT5G45000.1	protein_coding	-	-	45	58	46	62	54	61	29	60	42	69	72	81	58.79	44	74	1.743	0.801	0.0023202	0.0288637	0.0312	0.0281
AT3G04070.1	protein_coding	NAC047, SHYG, SHG, ANAC047	NAC domain containing protein 47, SPEEDY HYPONASTIC GROWTH	1024	926	1157	1276	1103	1304	668	957	1061	1414	1467	1725	1215.44	895	1535	1.74	0.799	7.17279e-09	5.29928e-07	0.0127	0.0124
AT3G18260.1	protein_coding	-	-	49	33	62	74	35	62	32	34	57	82	47	82	55.59	41	70	1.74	0.799	0.00313508	0.0360938	0.0324	0.029
AT5G08515.1	snoRNA			156	72	157	156	137	143	102	74	144	173	182	189	144.08	107	181	1.736	0.796	7.93859e-05	0.00195502	0.0215	0.0175
AT2G37750.1	protein_coding	-	-	533	564	664	737	608	739	348	583	609	817	809	978	690.46	513	868	1.735	0.795	4.46222e-07	2.20171e-05	0.016	0.0125
AT1G16260.3	protein_coding	-	-	211	152	110	149	215	185	138	157	101	165	286	245	181.92	132	232	1.733	0.793	9.19257e-05	0.00220518	0.0231	0.0161
AT2G08860.1	snoRNA			243	153	509	344	234	398	159	158	467	381	311	527	333.75	261	406	1.732	0.792	5.82188e-05	0.00151005	0.0237	0.0138
AT3G46660.1	protein_coding	UGT76E12	UDP-glucosyl transferase 76E12	733	623	770	1051	735	748	479	644	706	1165	978	990	826.71	610	1044	1.731	0.792	8.32429e-07	3.81585e-05	0.0169	0.0124
AT4G01700.1	protein_coding	-	-	214	173	170	250	189	217	140	179	156	277	251	287	214.98	158	272	1.73	0.791	2.14035e-06	8.84775e-05	0.0149	0.0153
[truncated: 2,160 more rows]

## Sheet: OXRSH1+N vs WT+N
Id				wt_1	wt_2	wt_3	oxrsh1_1	oxrsh1_2	oxrsh1_3	norm.wt_1	norm.wt_2	norm.wt_3	norm.oxrsh1_1	norm.oxrsh1_2	norm.oxrsh1_3	baseMean	WT	OXRSH1	FC	log2FoldChange	pvalue	padj	tagwise.dispersion	trended.dispersion
[truncated: 144 more rows]

[truncated: 1 more sheets: OXRSH1-N vs OXRSH1+N]
