# Supplementary figures and images for: A guanosine tetraphosphate (ppGpp) mediated brake on photosynthesis is required for acclimation to nitrogen limitation in Arabidopsis
Source: eLife journal article supplement (doi:10.7554/elife.75041), 2022-02-14

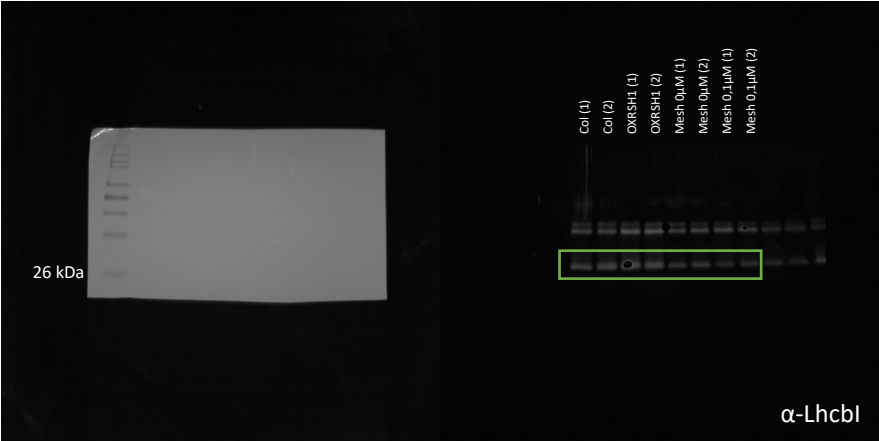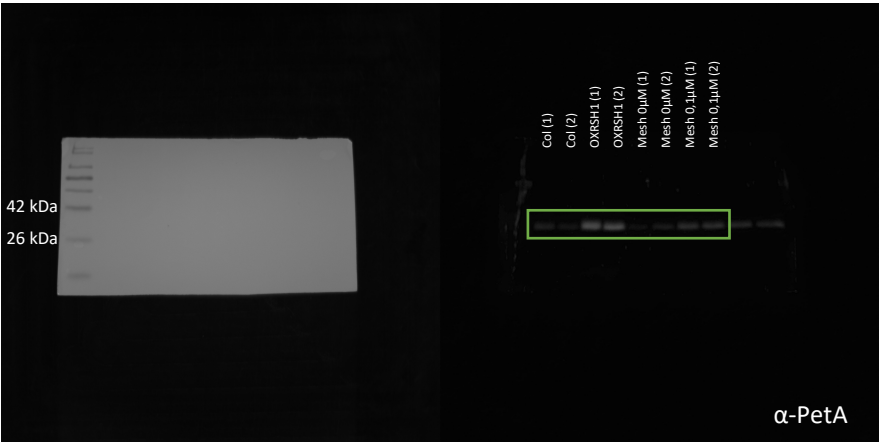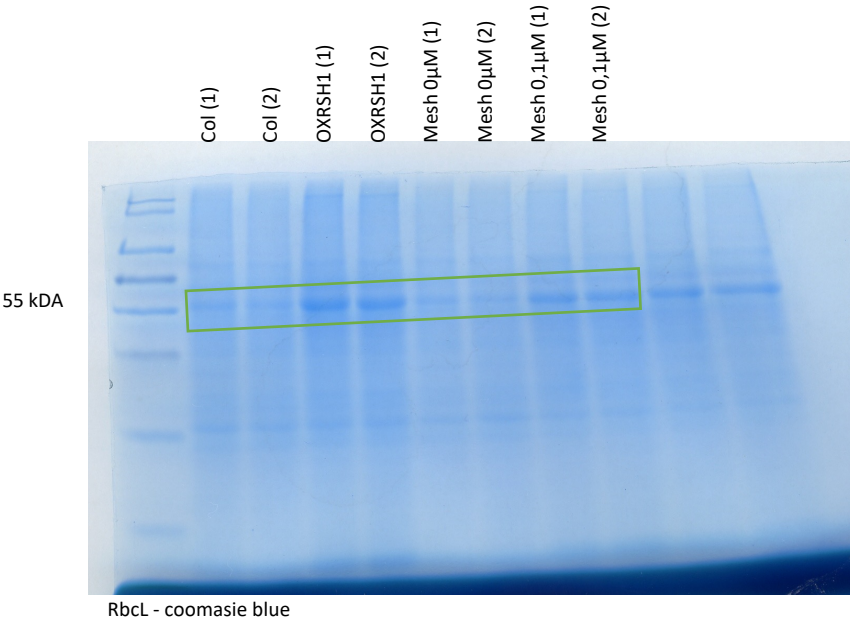

Fig. S5 source data : Full sized immune blots and coomassie blue.

Supplement: fig3-data3 [file elife-75041-fig3-data3-v2.zip]

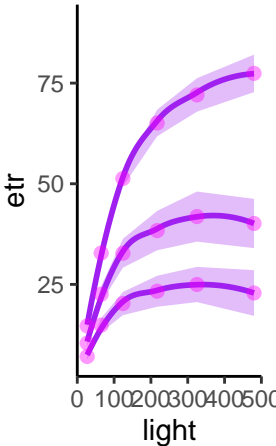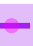

01\_qrt

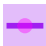

02\_QM

Supplement: supp3 [file elife-75041-supp3-v2.zip]

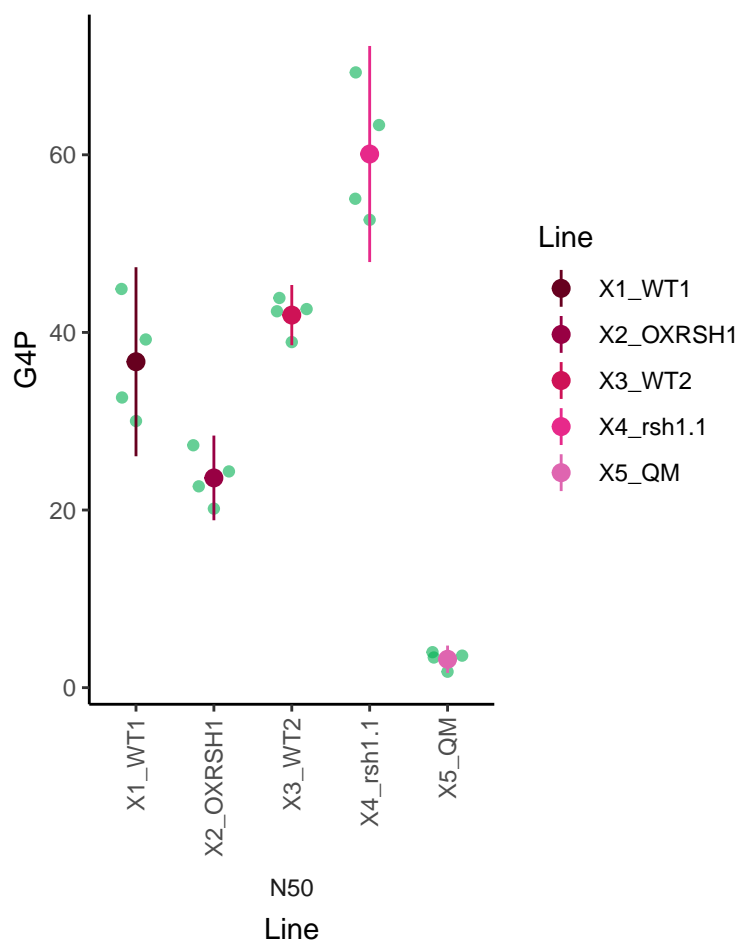

Supplement: supp3 [file elife-75041-supp3-v2.zip]

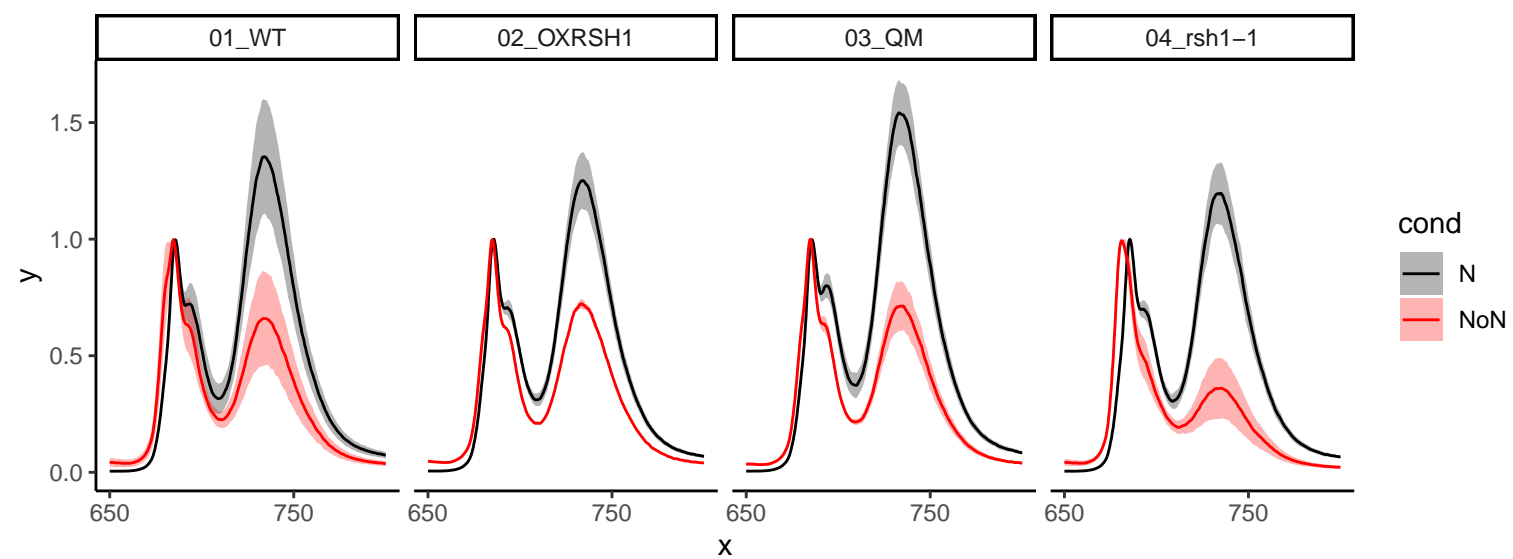

Supplement: supp3 [file elife-75041-supp3-v2.zip]

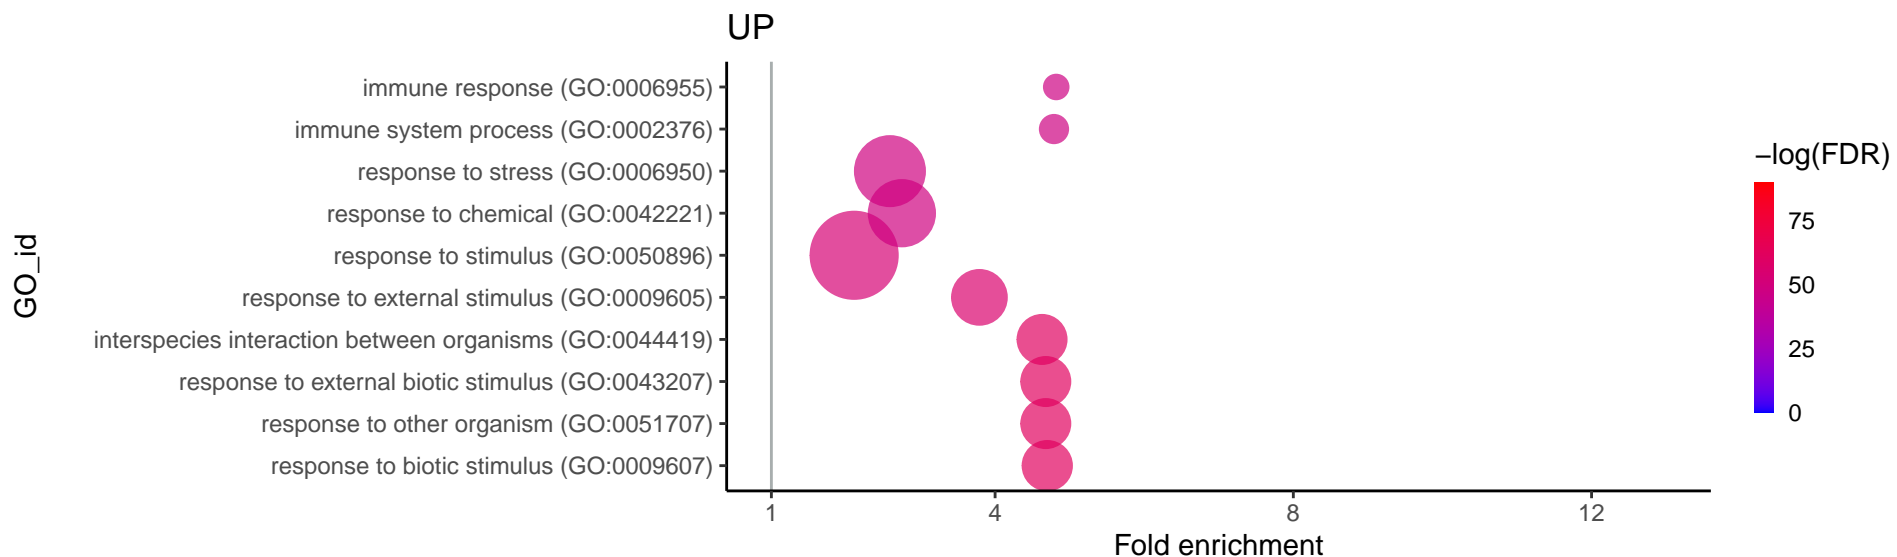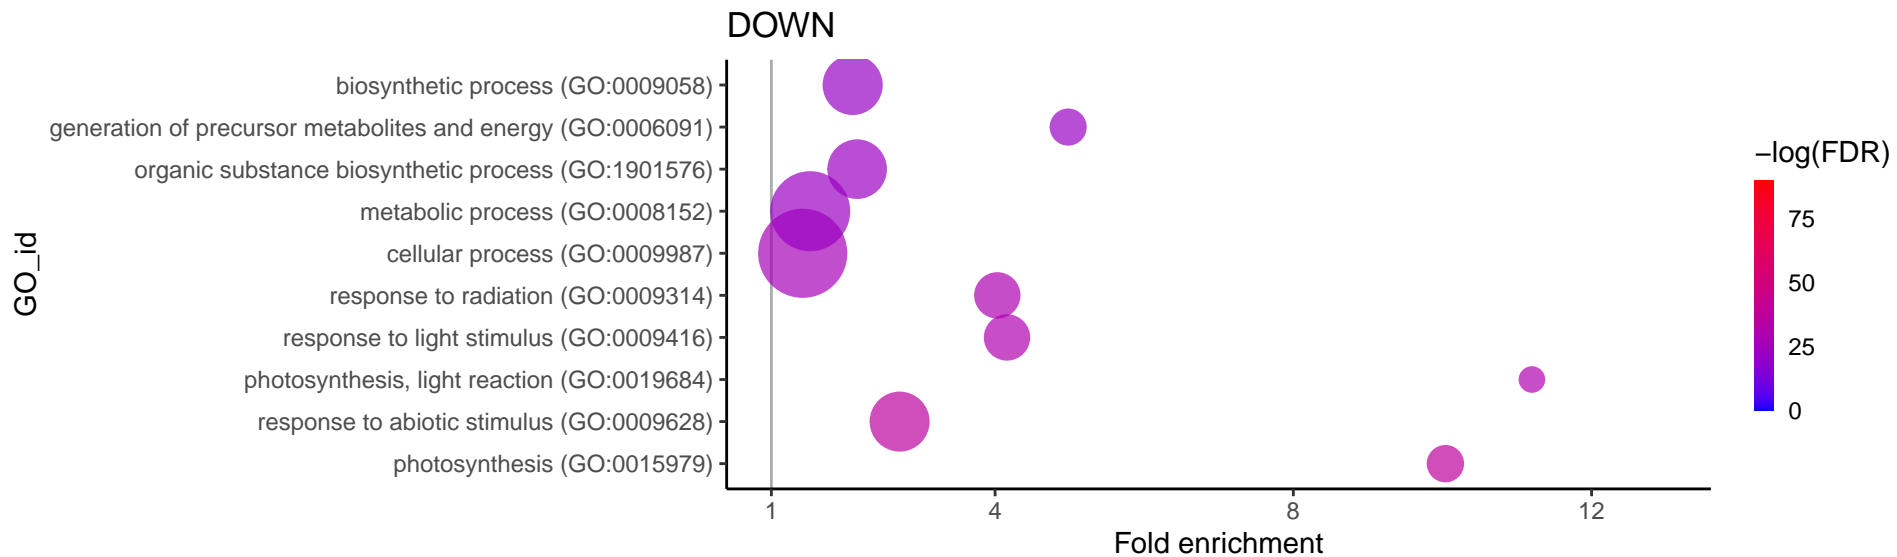

Supplement: supp3 [file elife-75041-supp3-v2.zip]

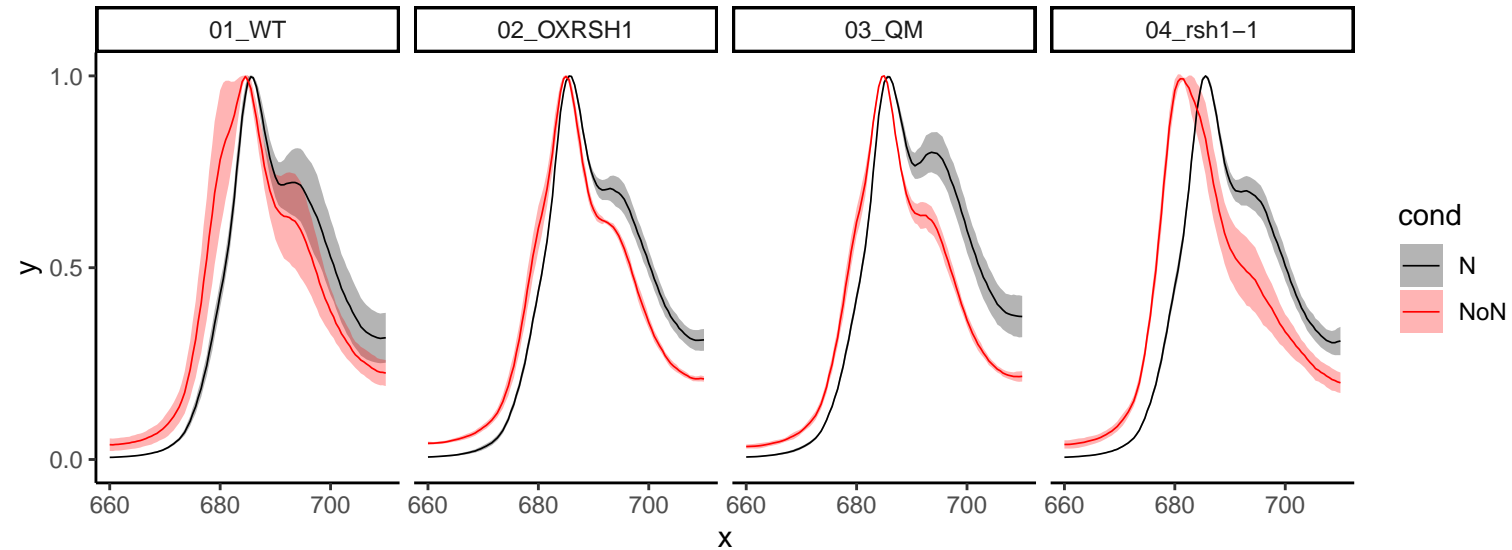

Supplement: supp3 [file elife-75041-supp3-v2.zip]

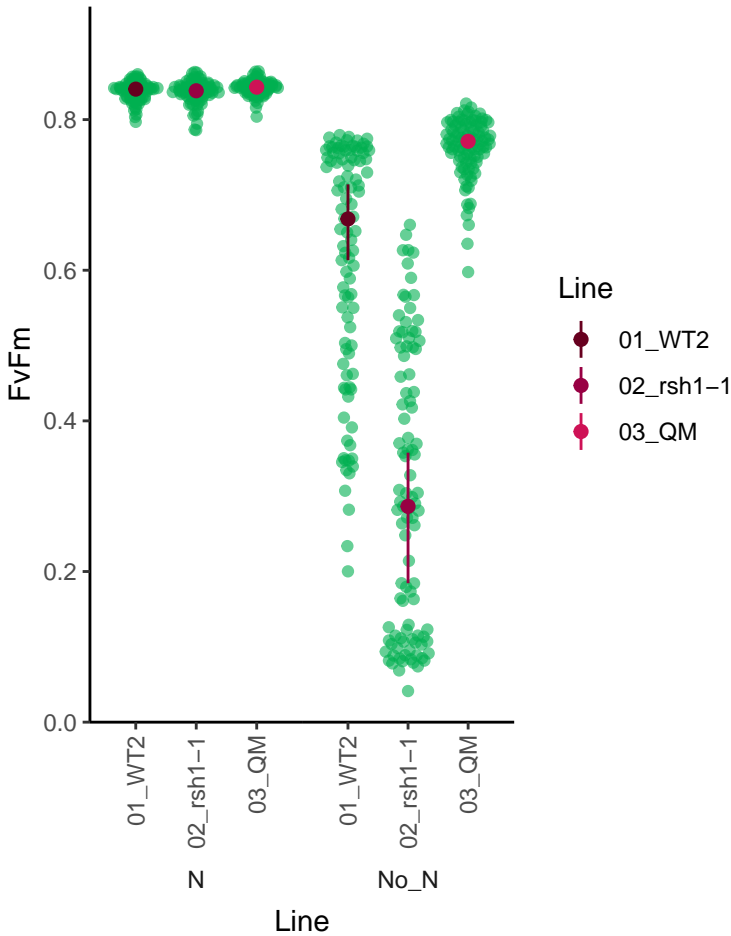

Supplement: supp3 [file elife-75041-supp3-v2.zip]

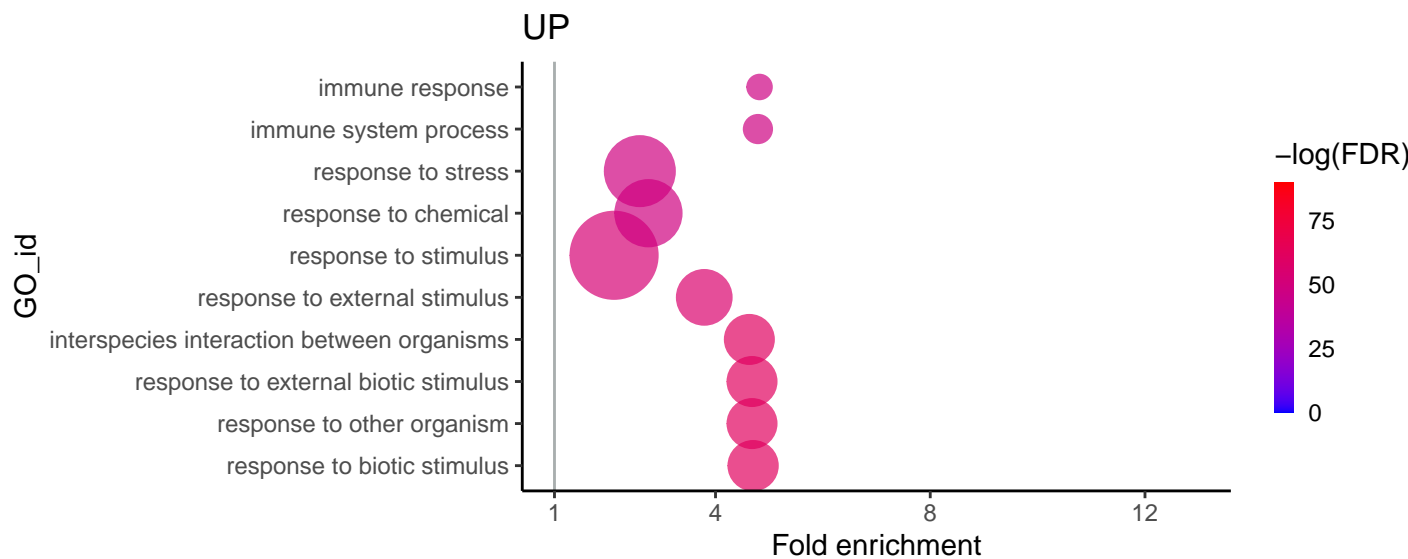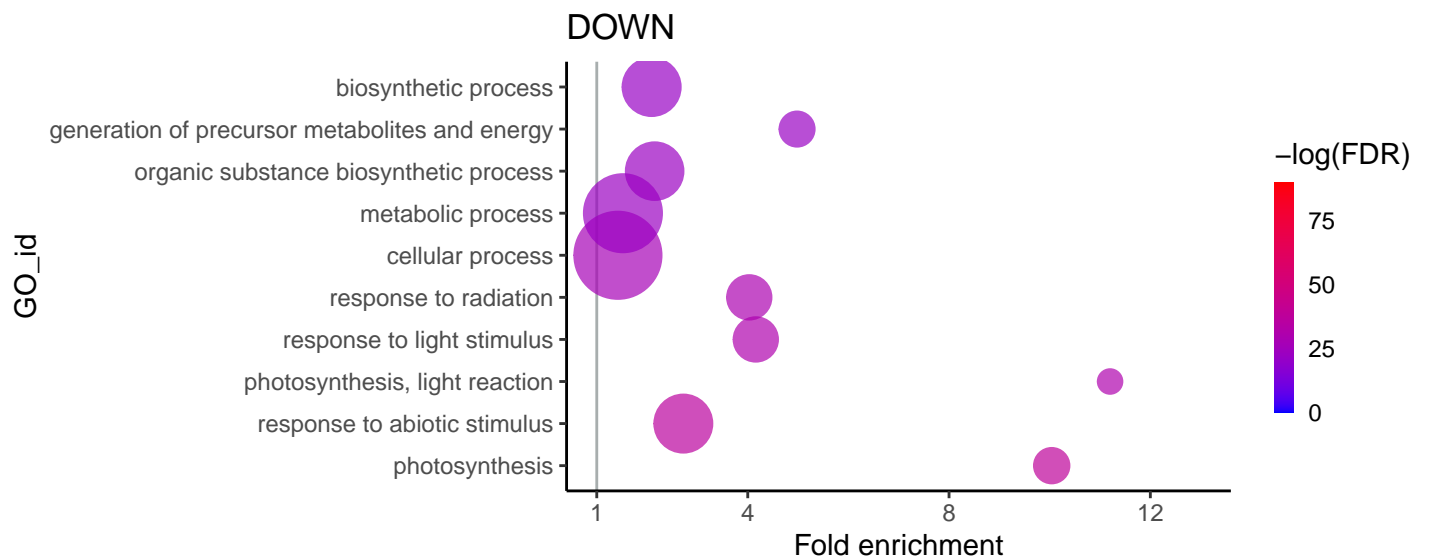

Supplement: supp3 [file elife-75041-supp3-v2.zip]
